# Supplementary material for: Heterogeneous Genomic Divergence Landscape in Two Commercially Important European Scallop Species
Source: MDPI journal article supplement (doi:10.3390/genes14010014), 2022-12-21

P. maximus - Chromosome 1

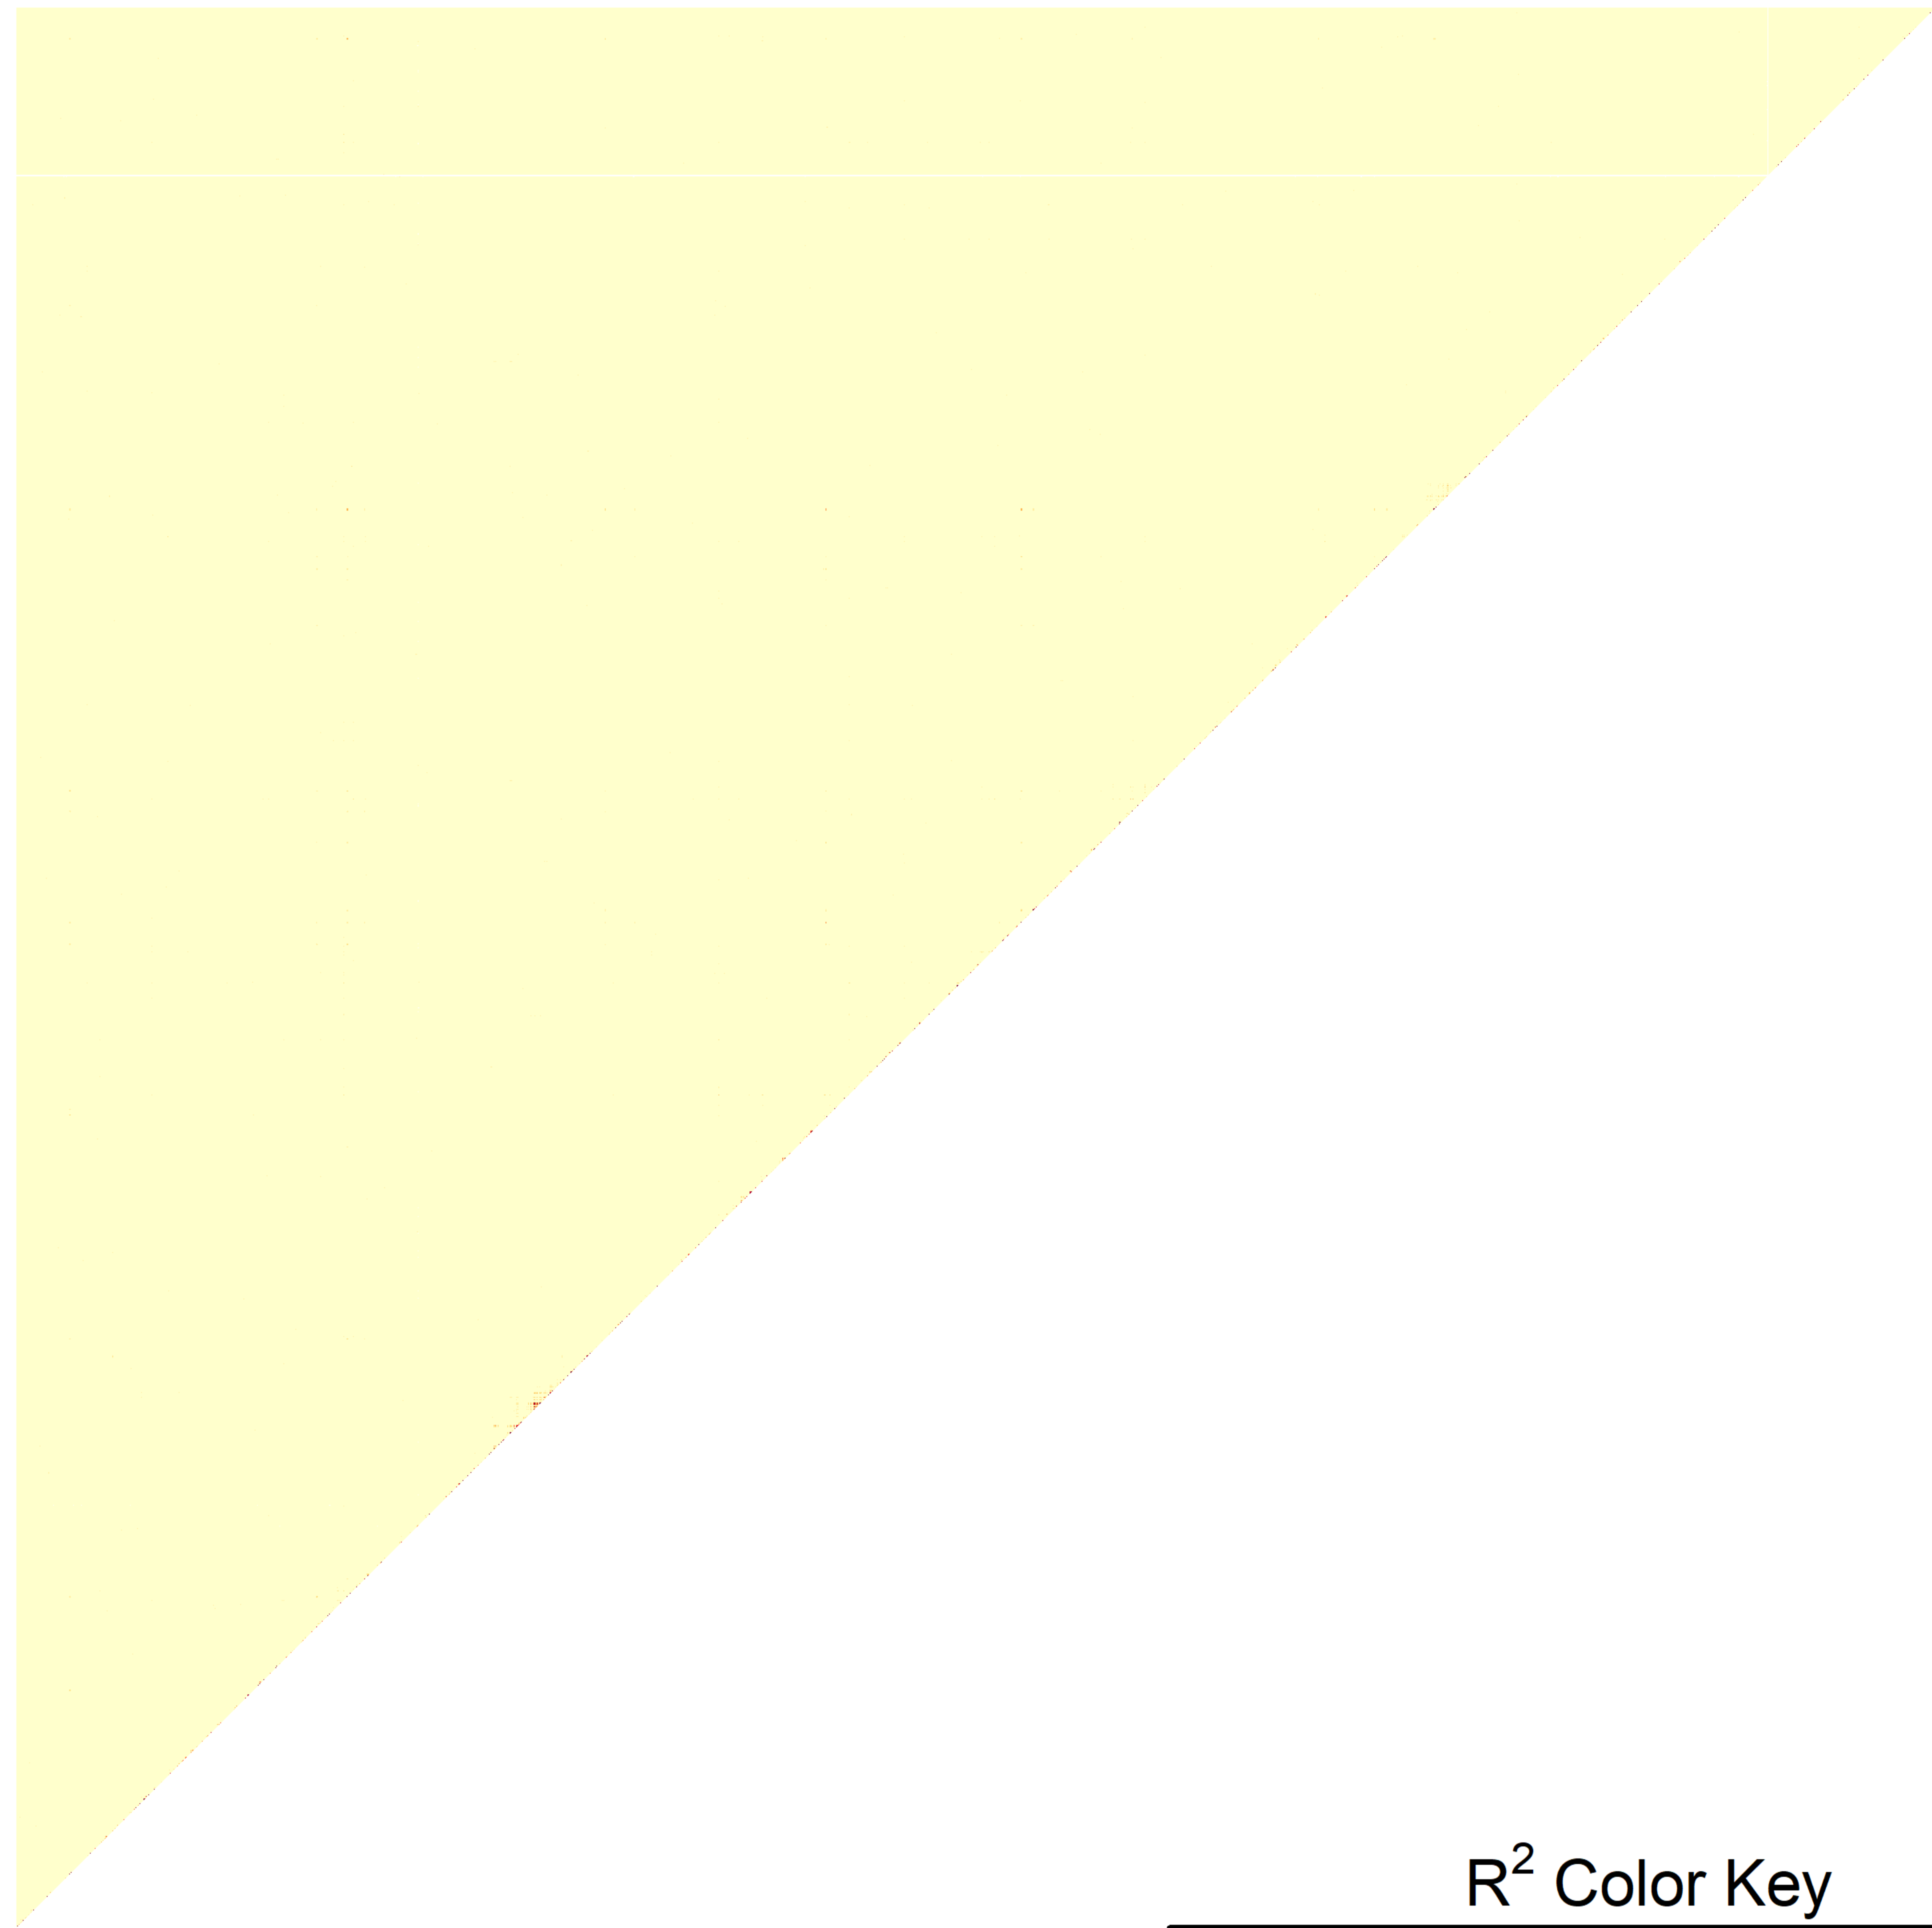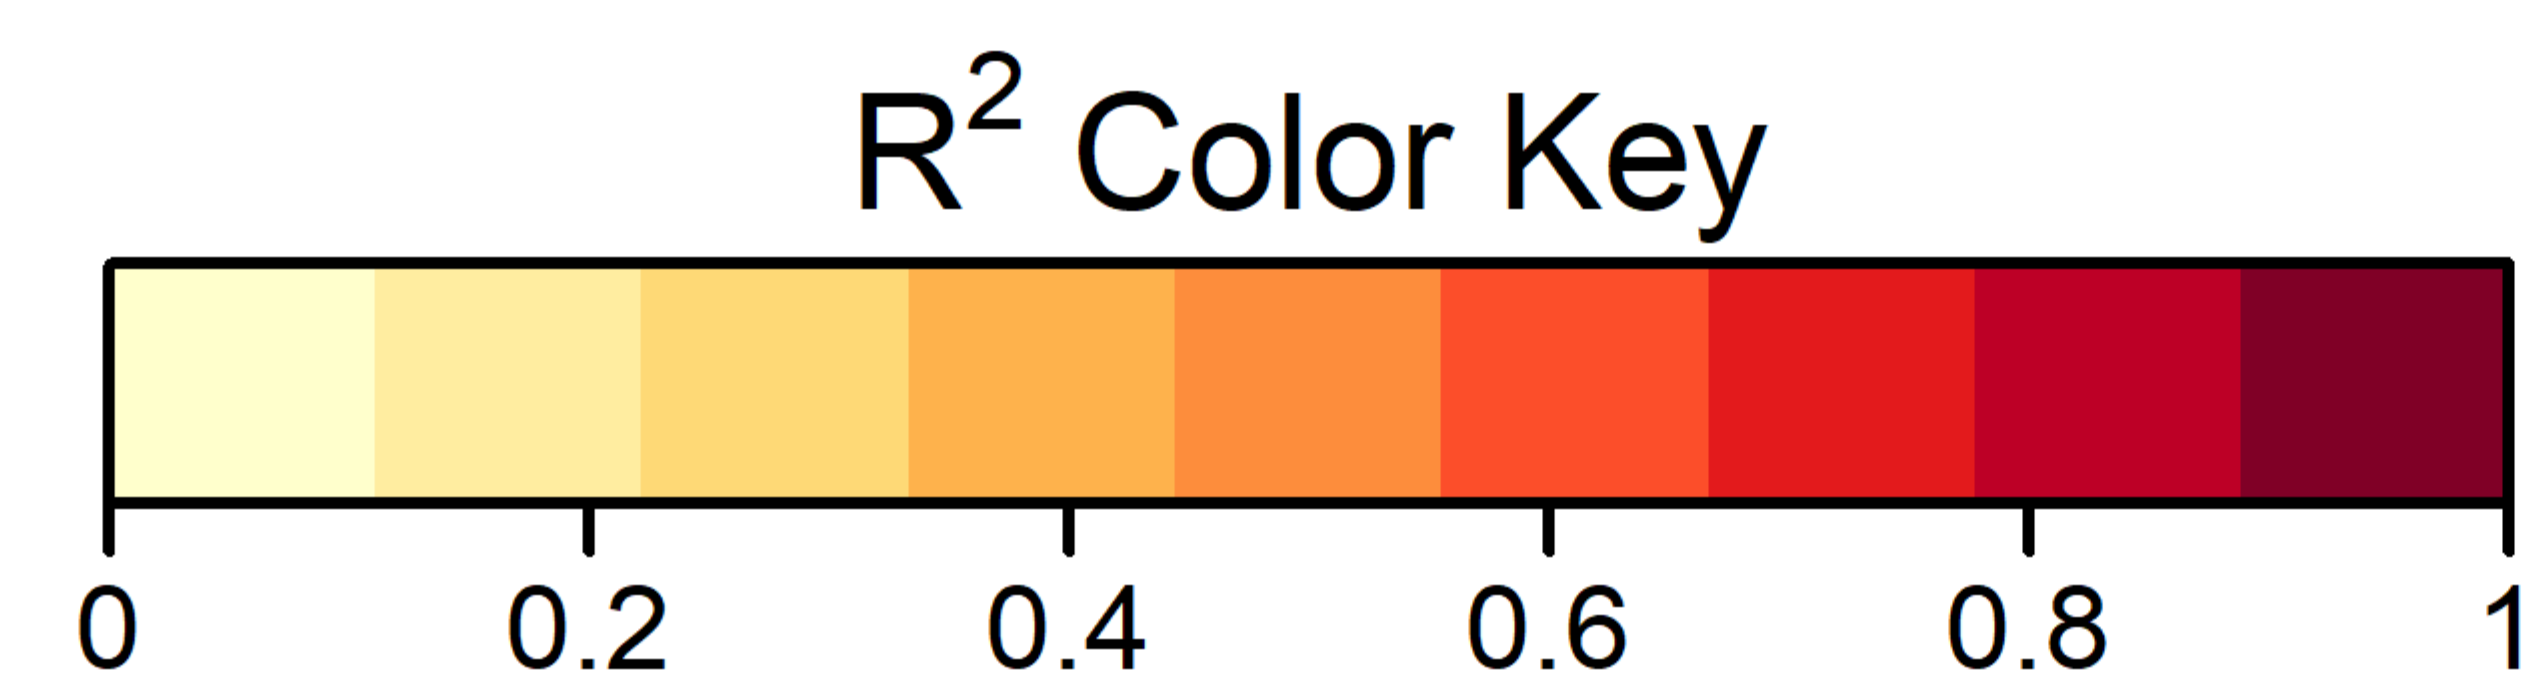

P. jacobaeus - Chromosome 1

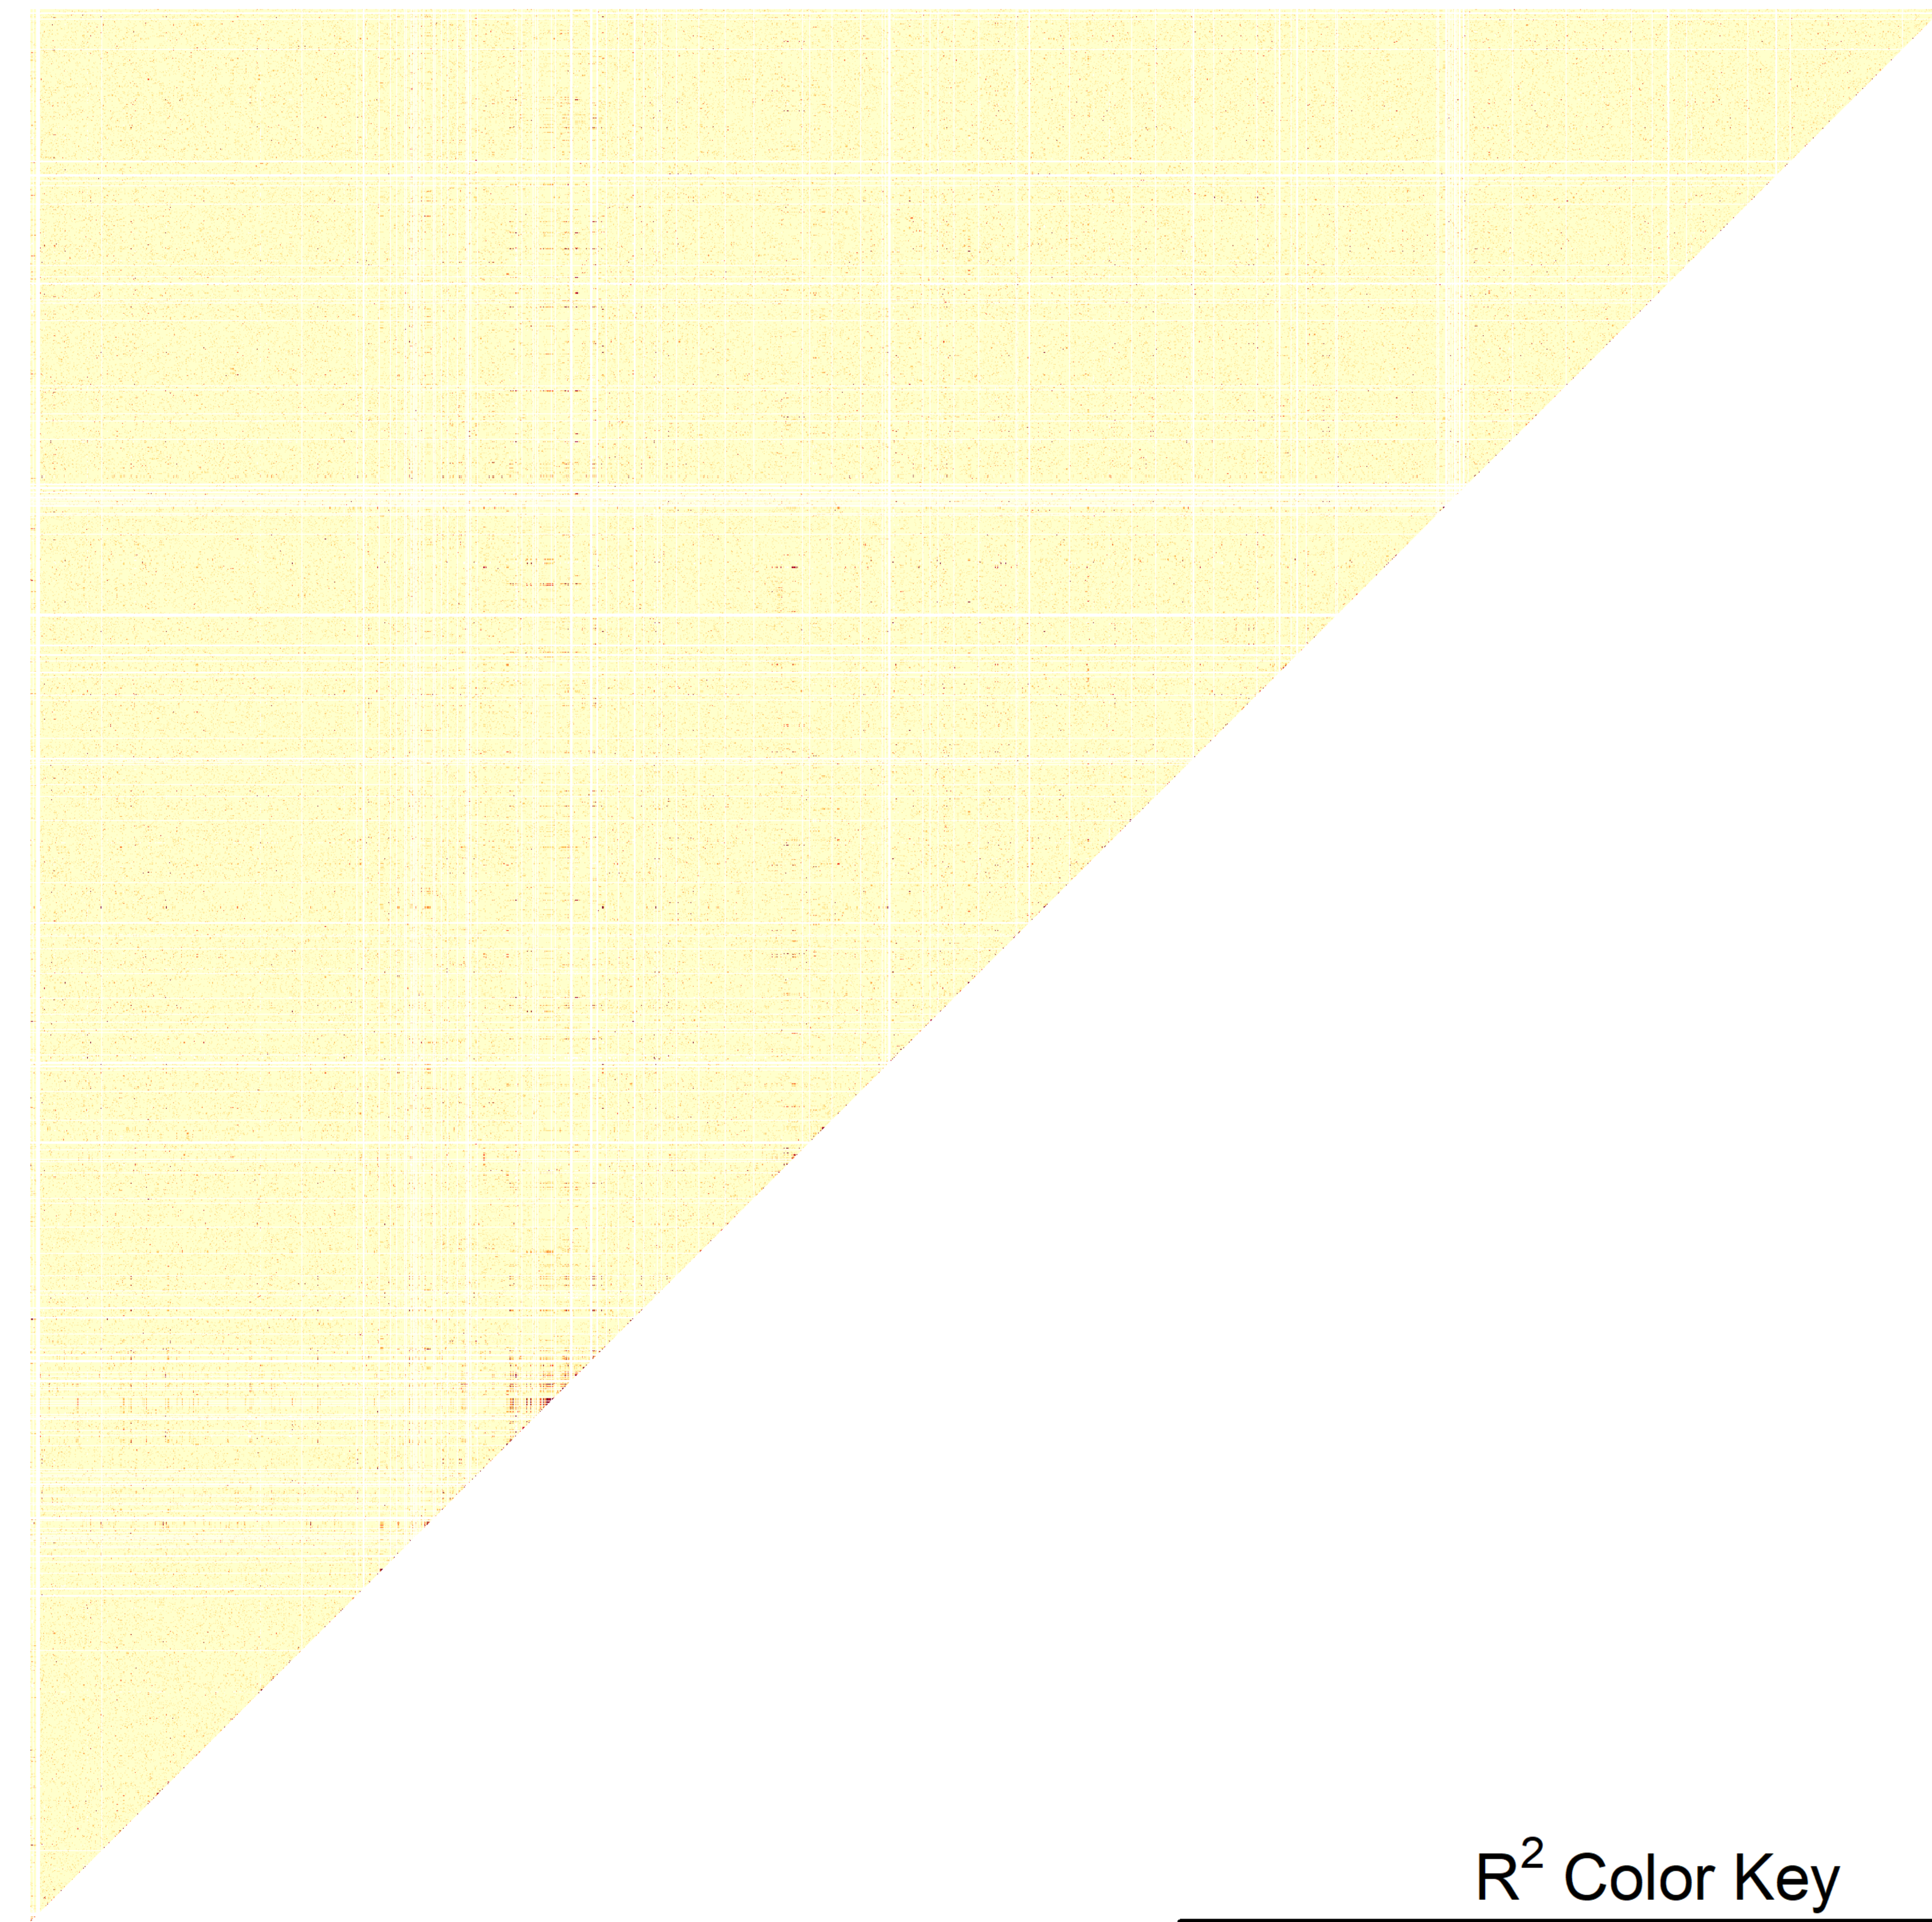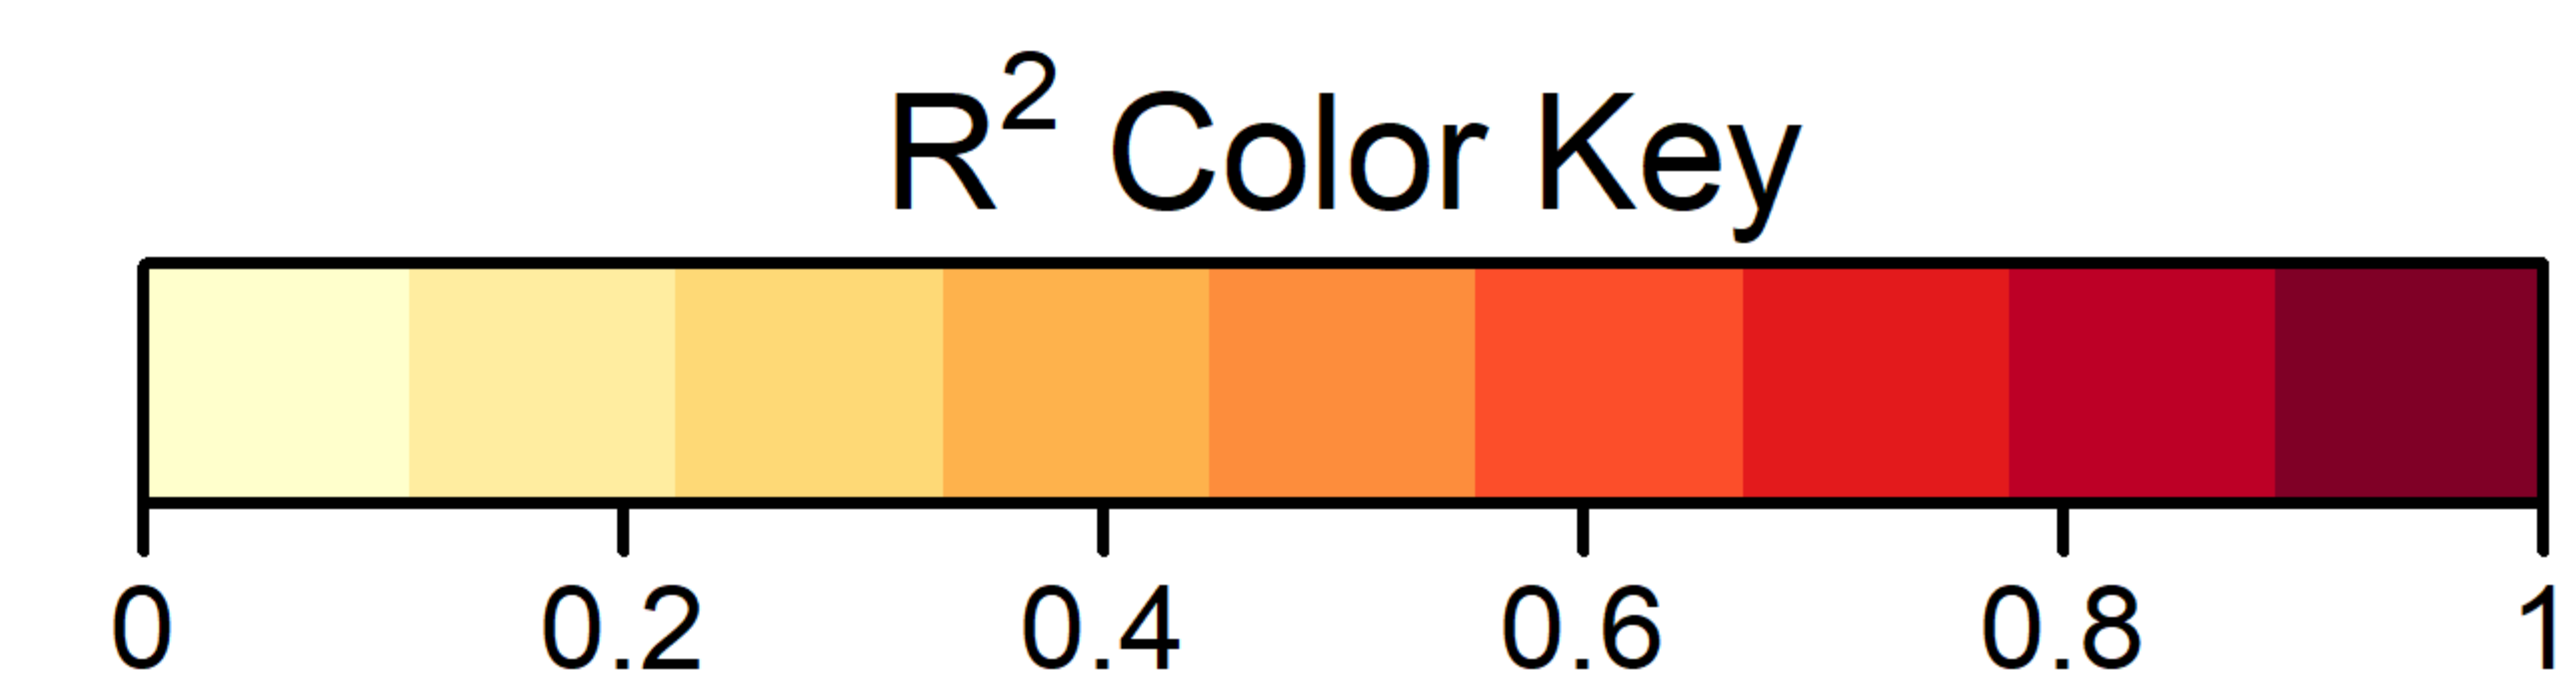



P. maximus - Chromosome 2

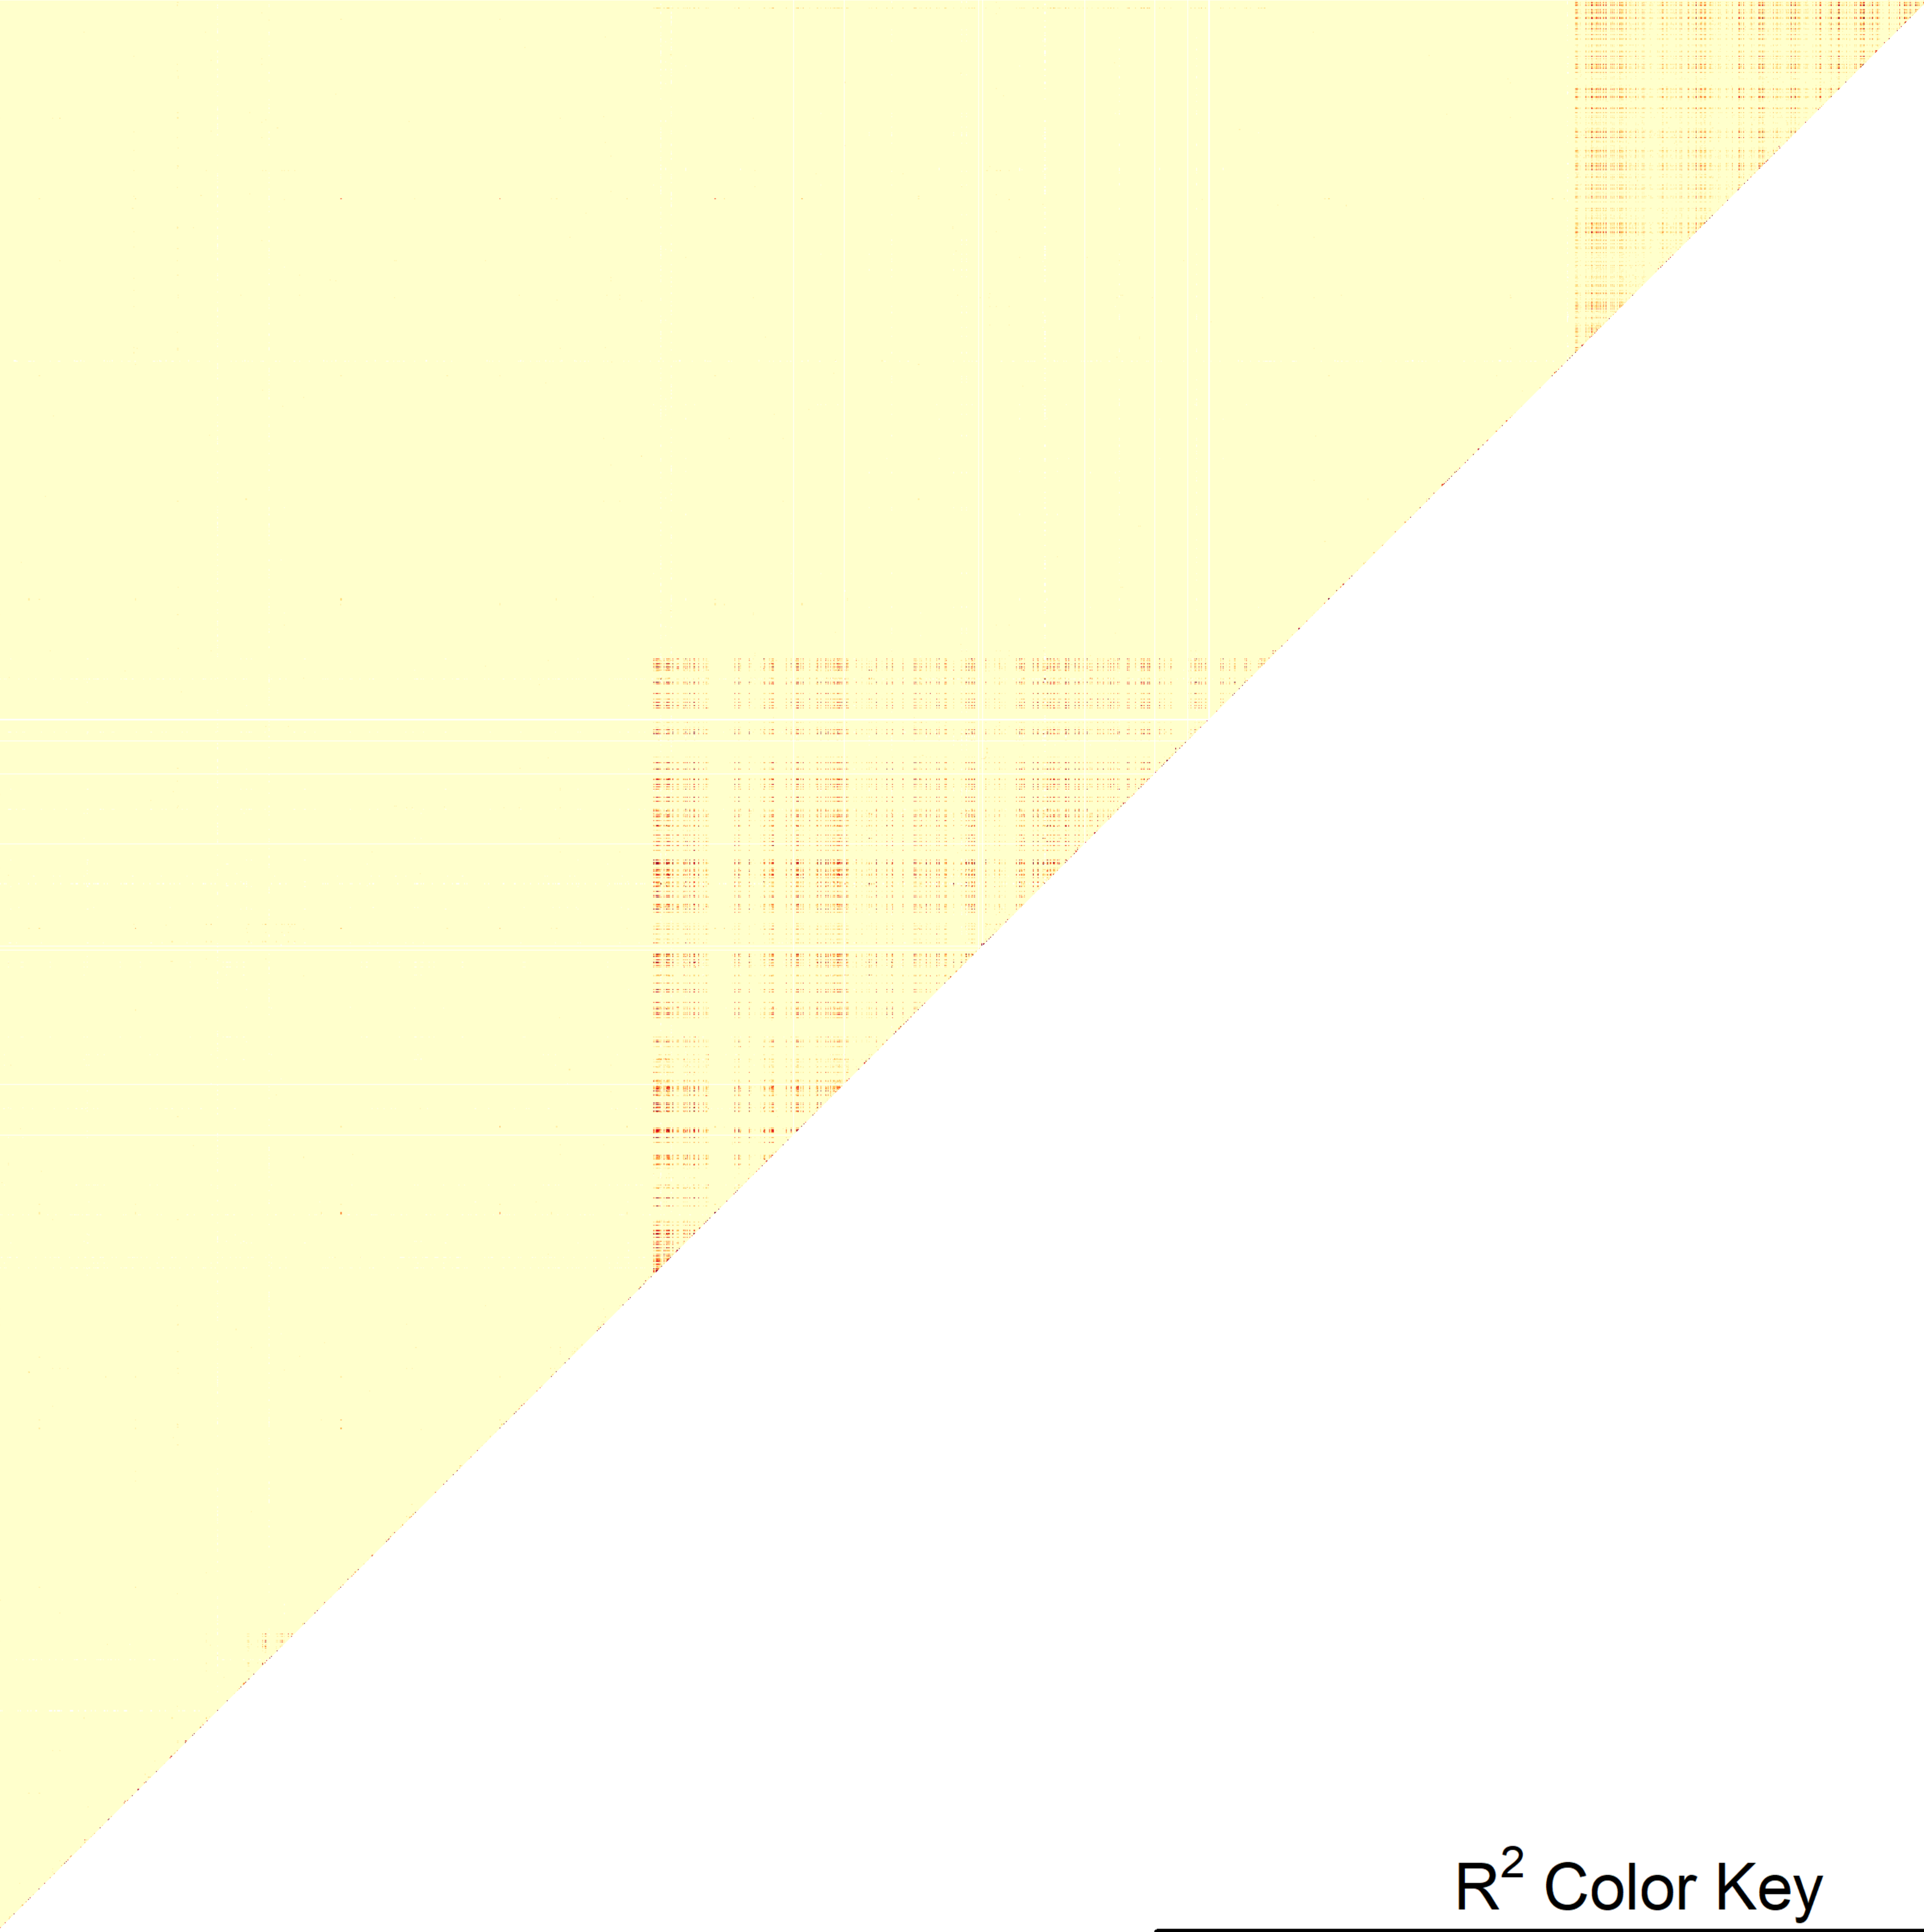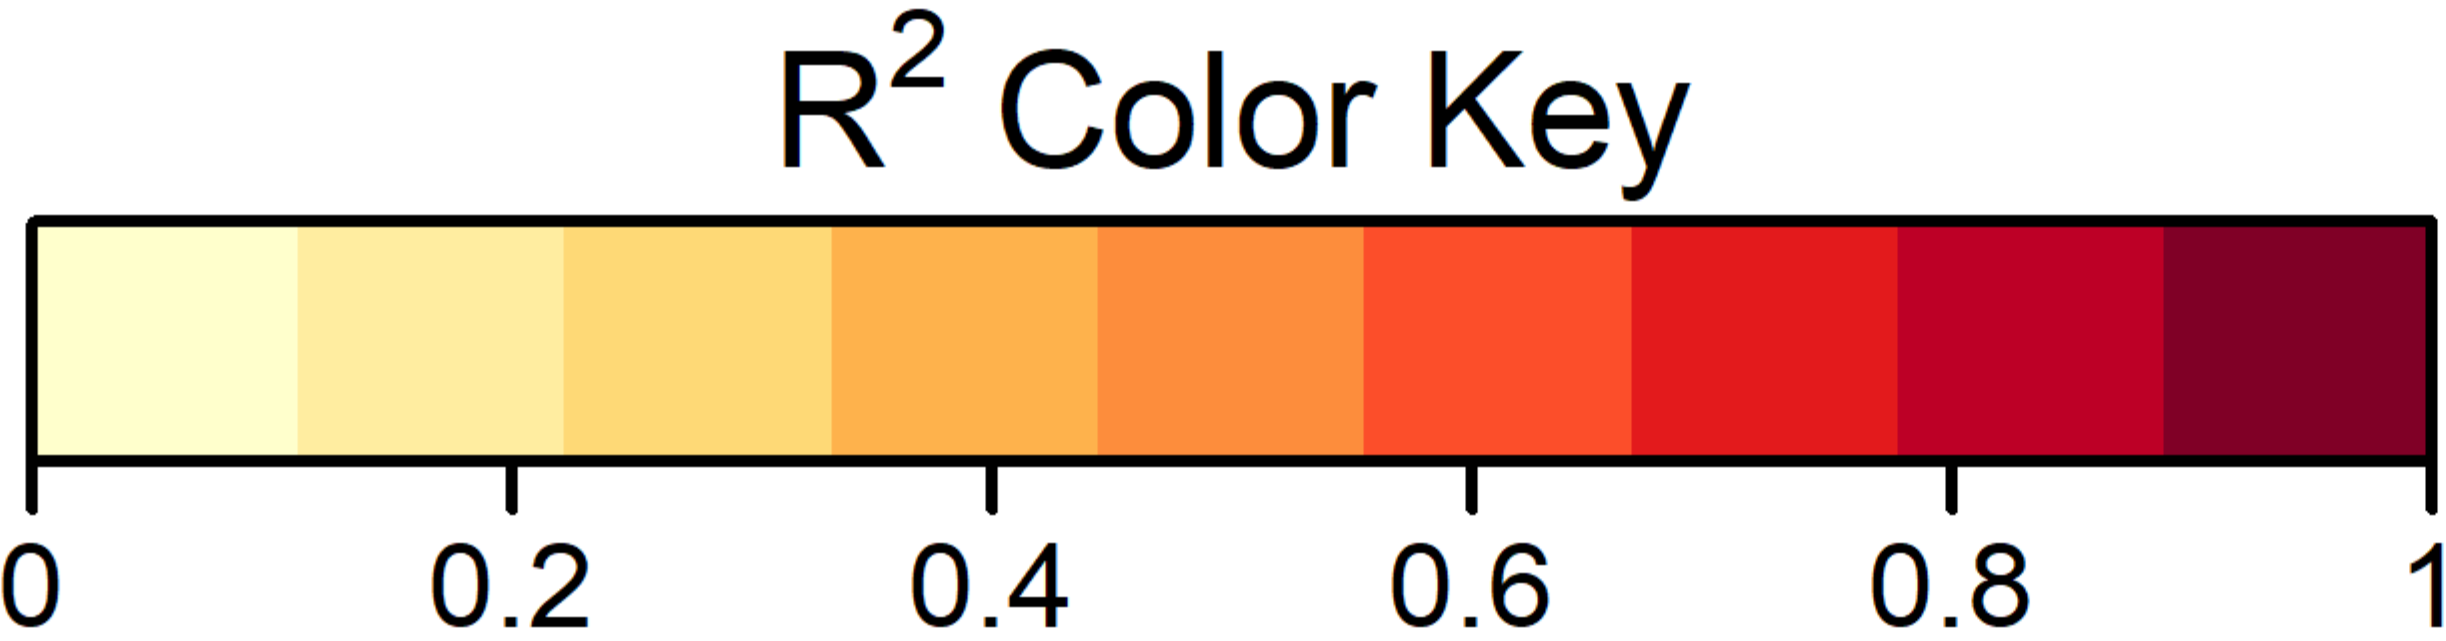

P. jacobaeus - Chromosome 2

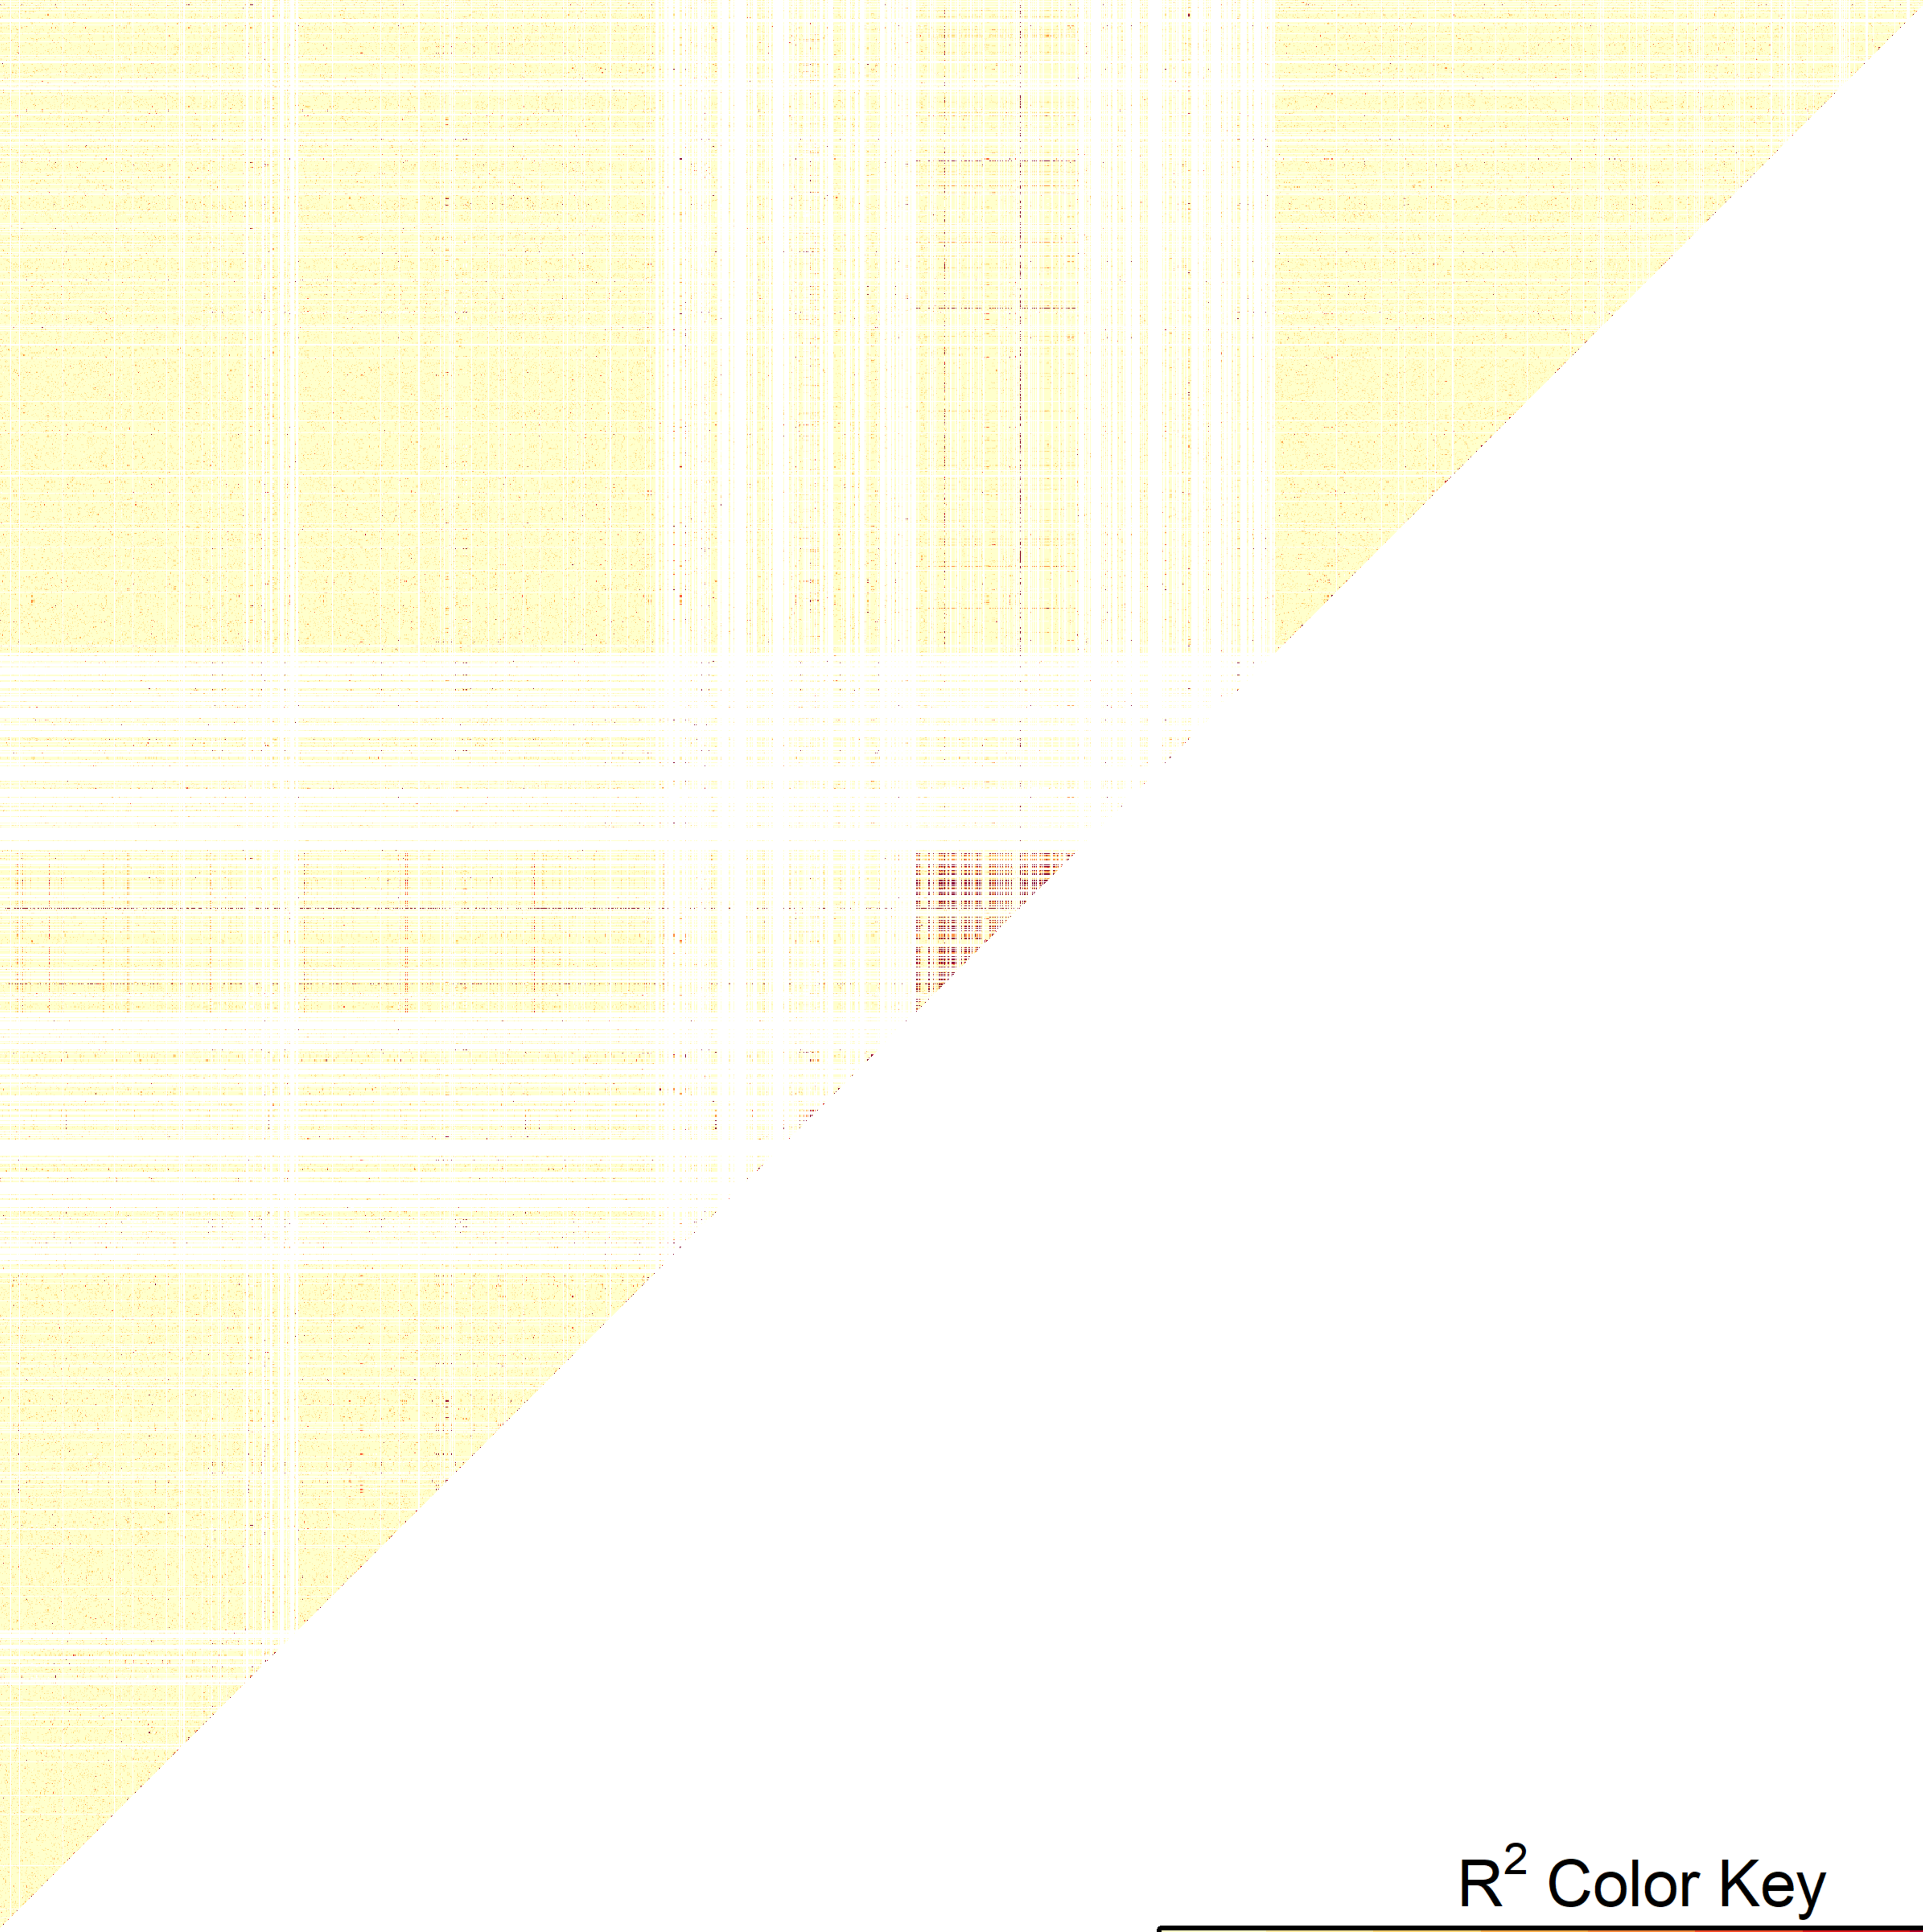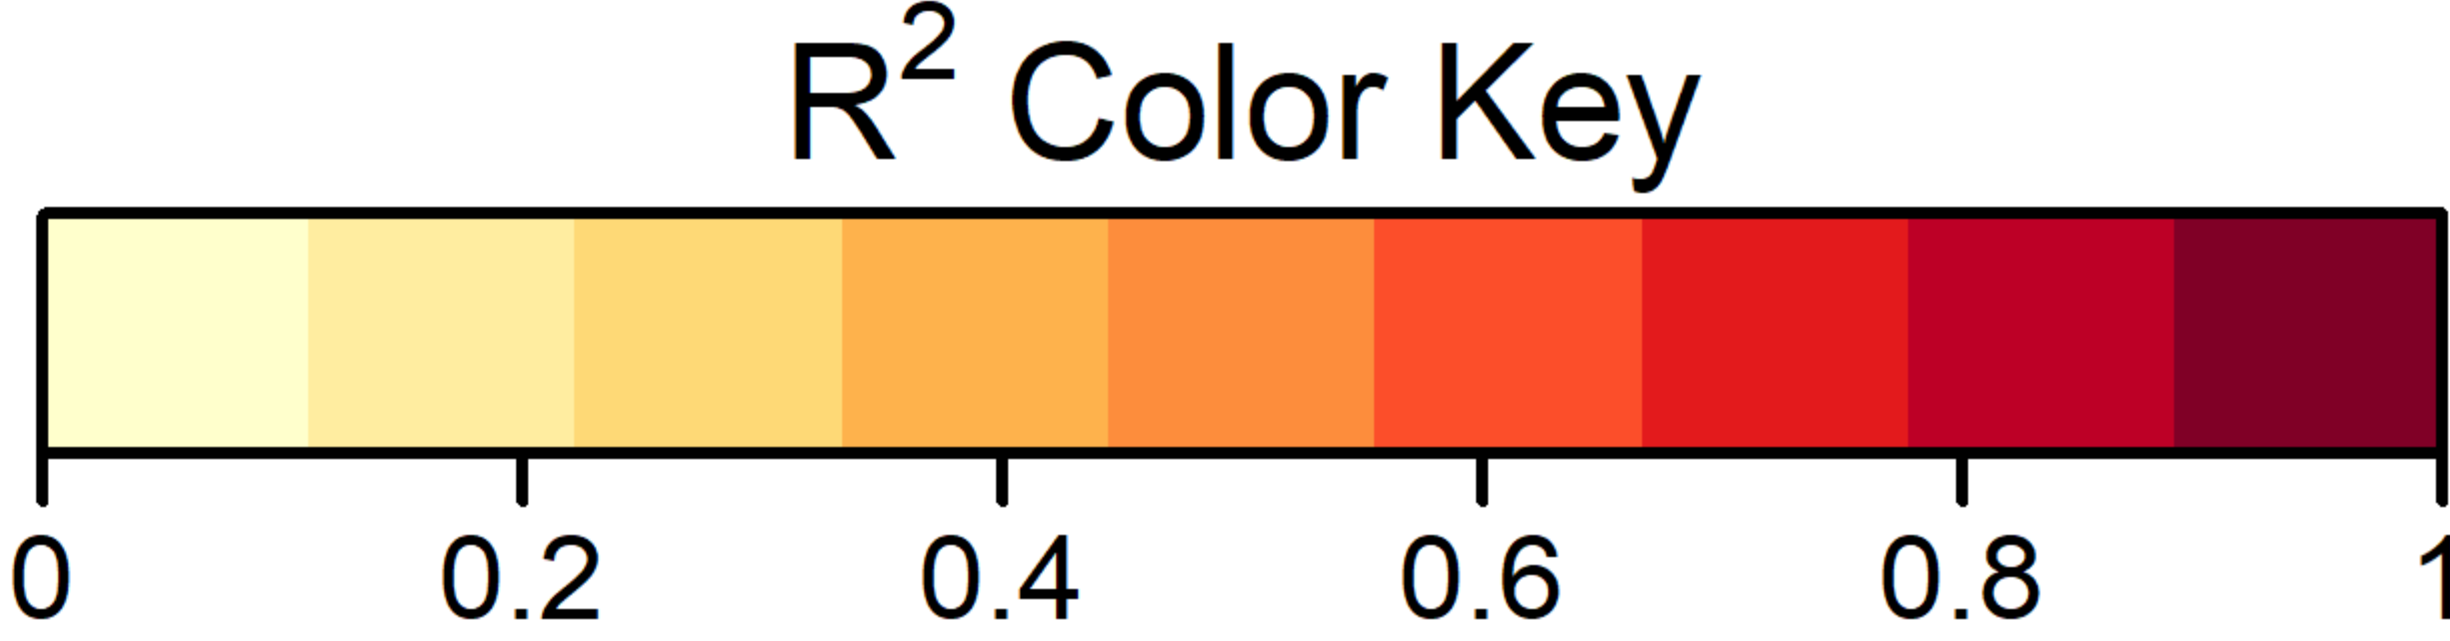



P. maximus - Chromosome 3

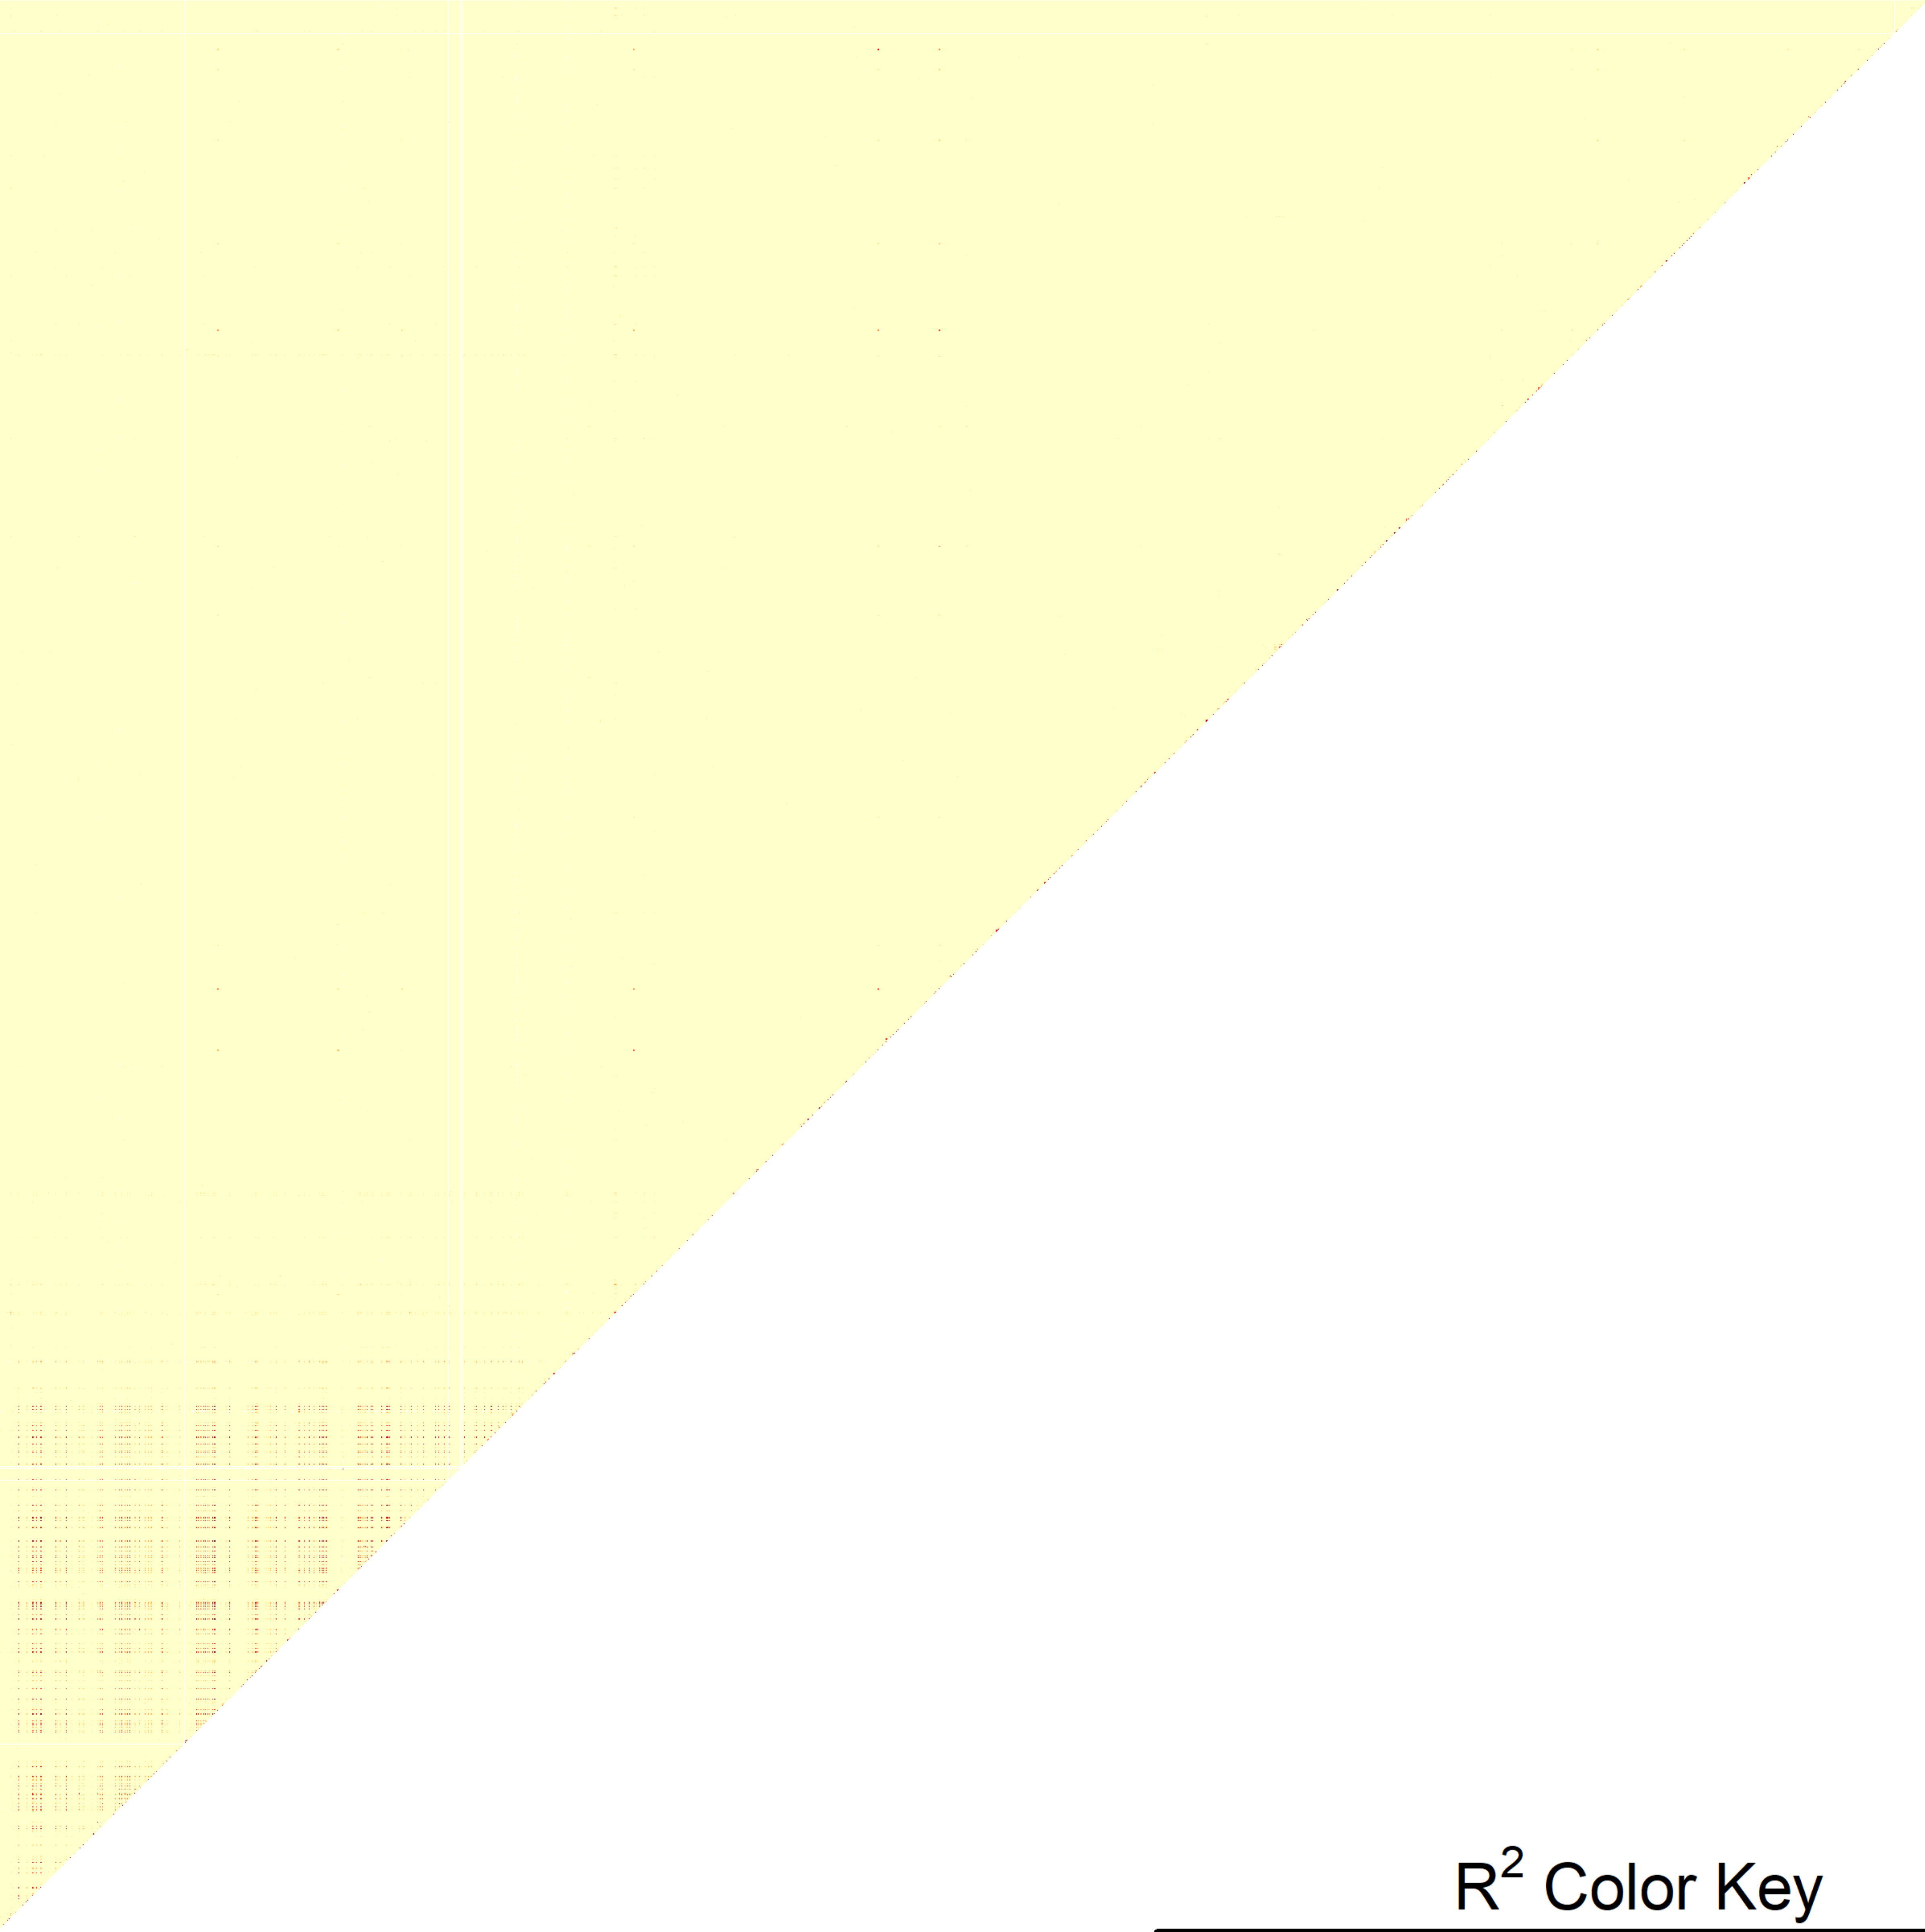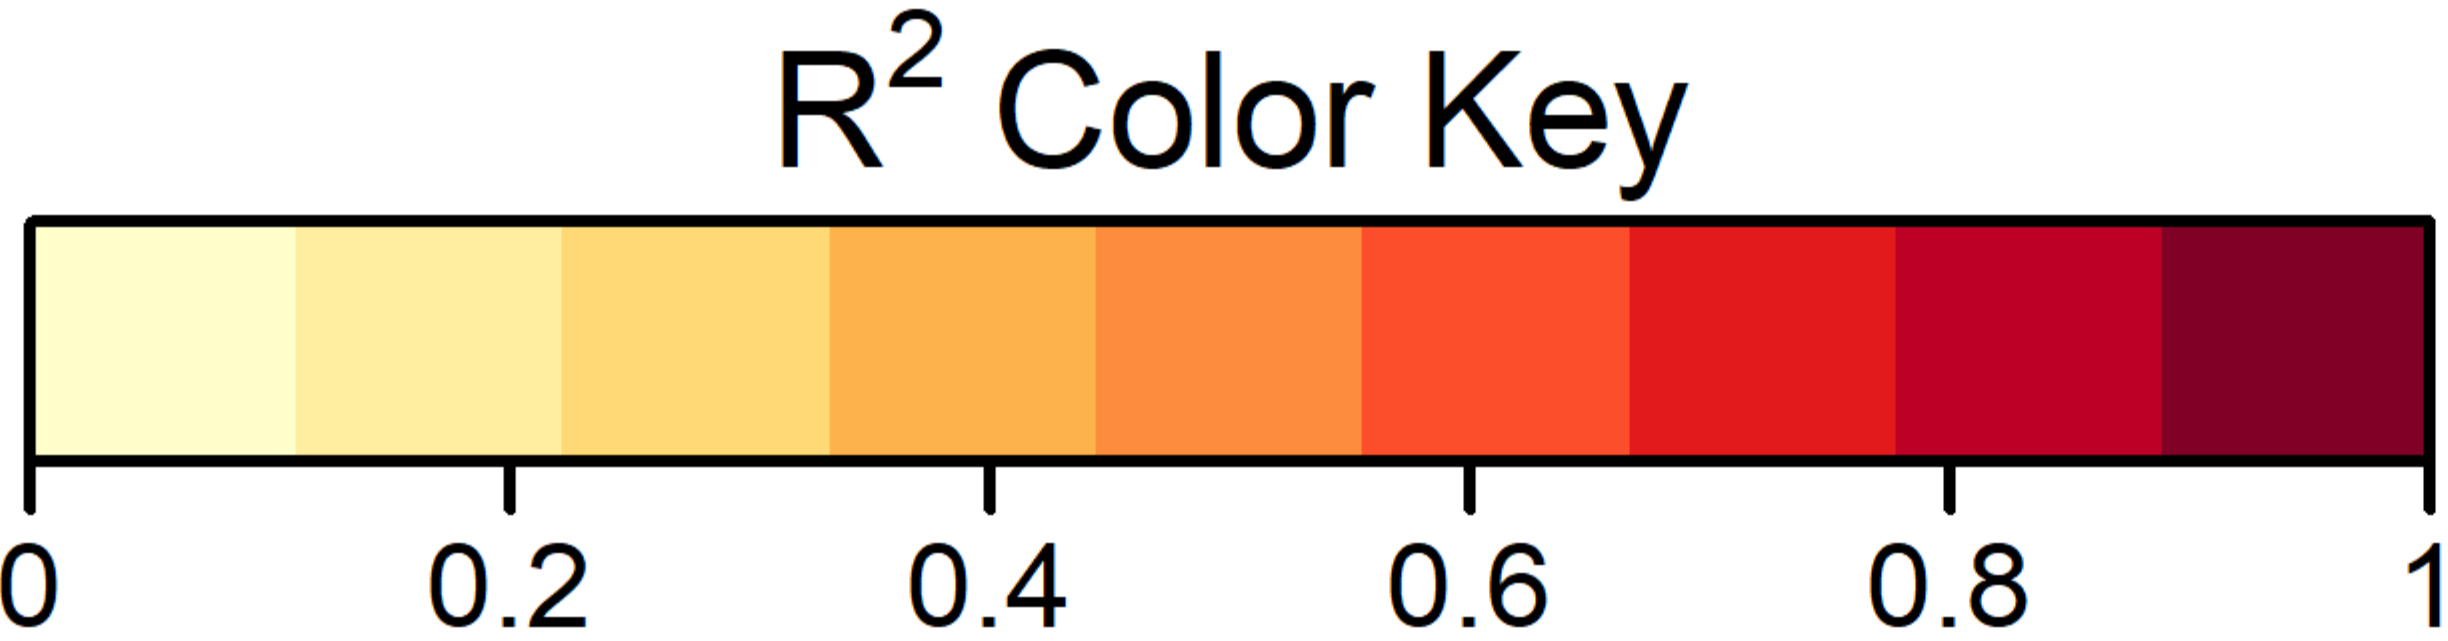

P. jacobaeus - Chromosome 3

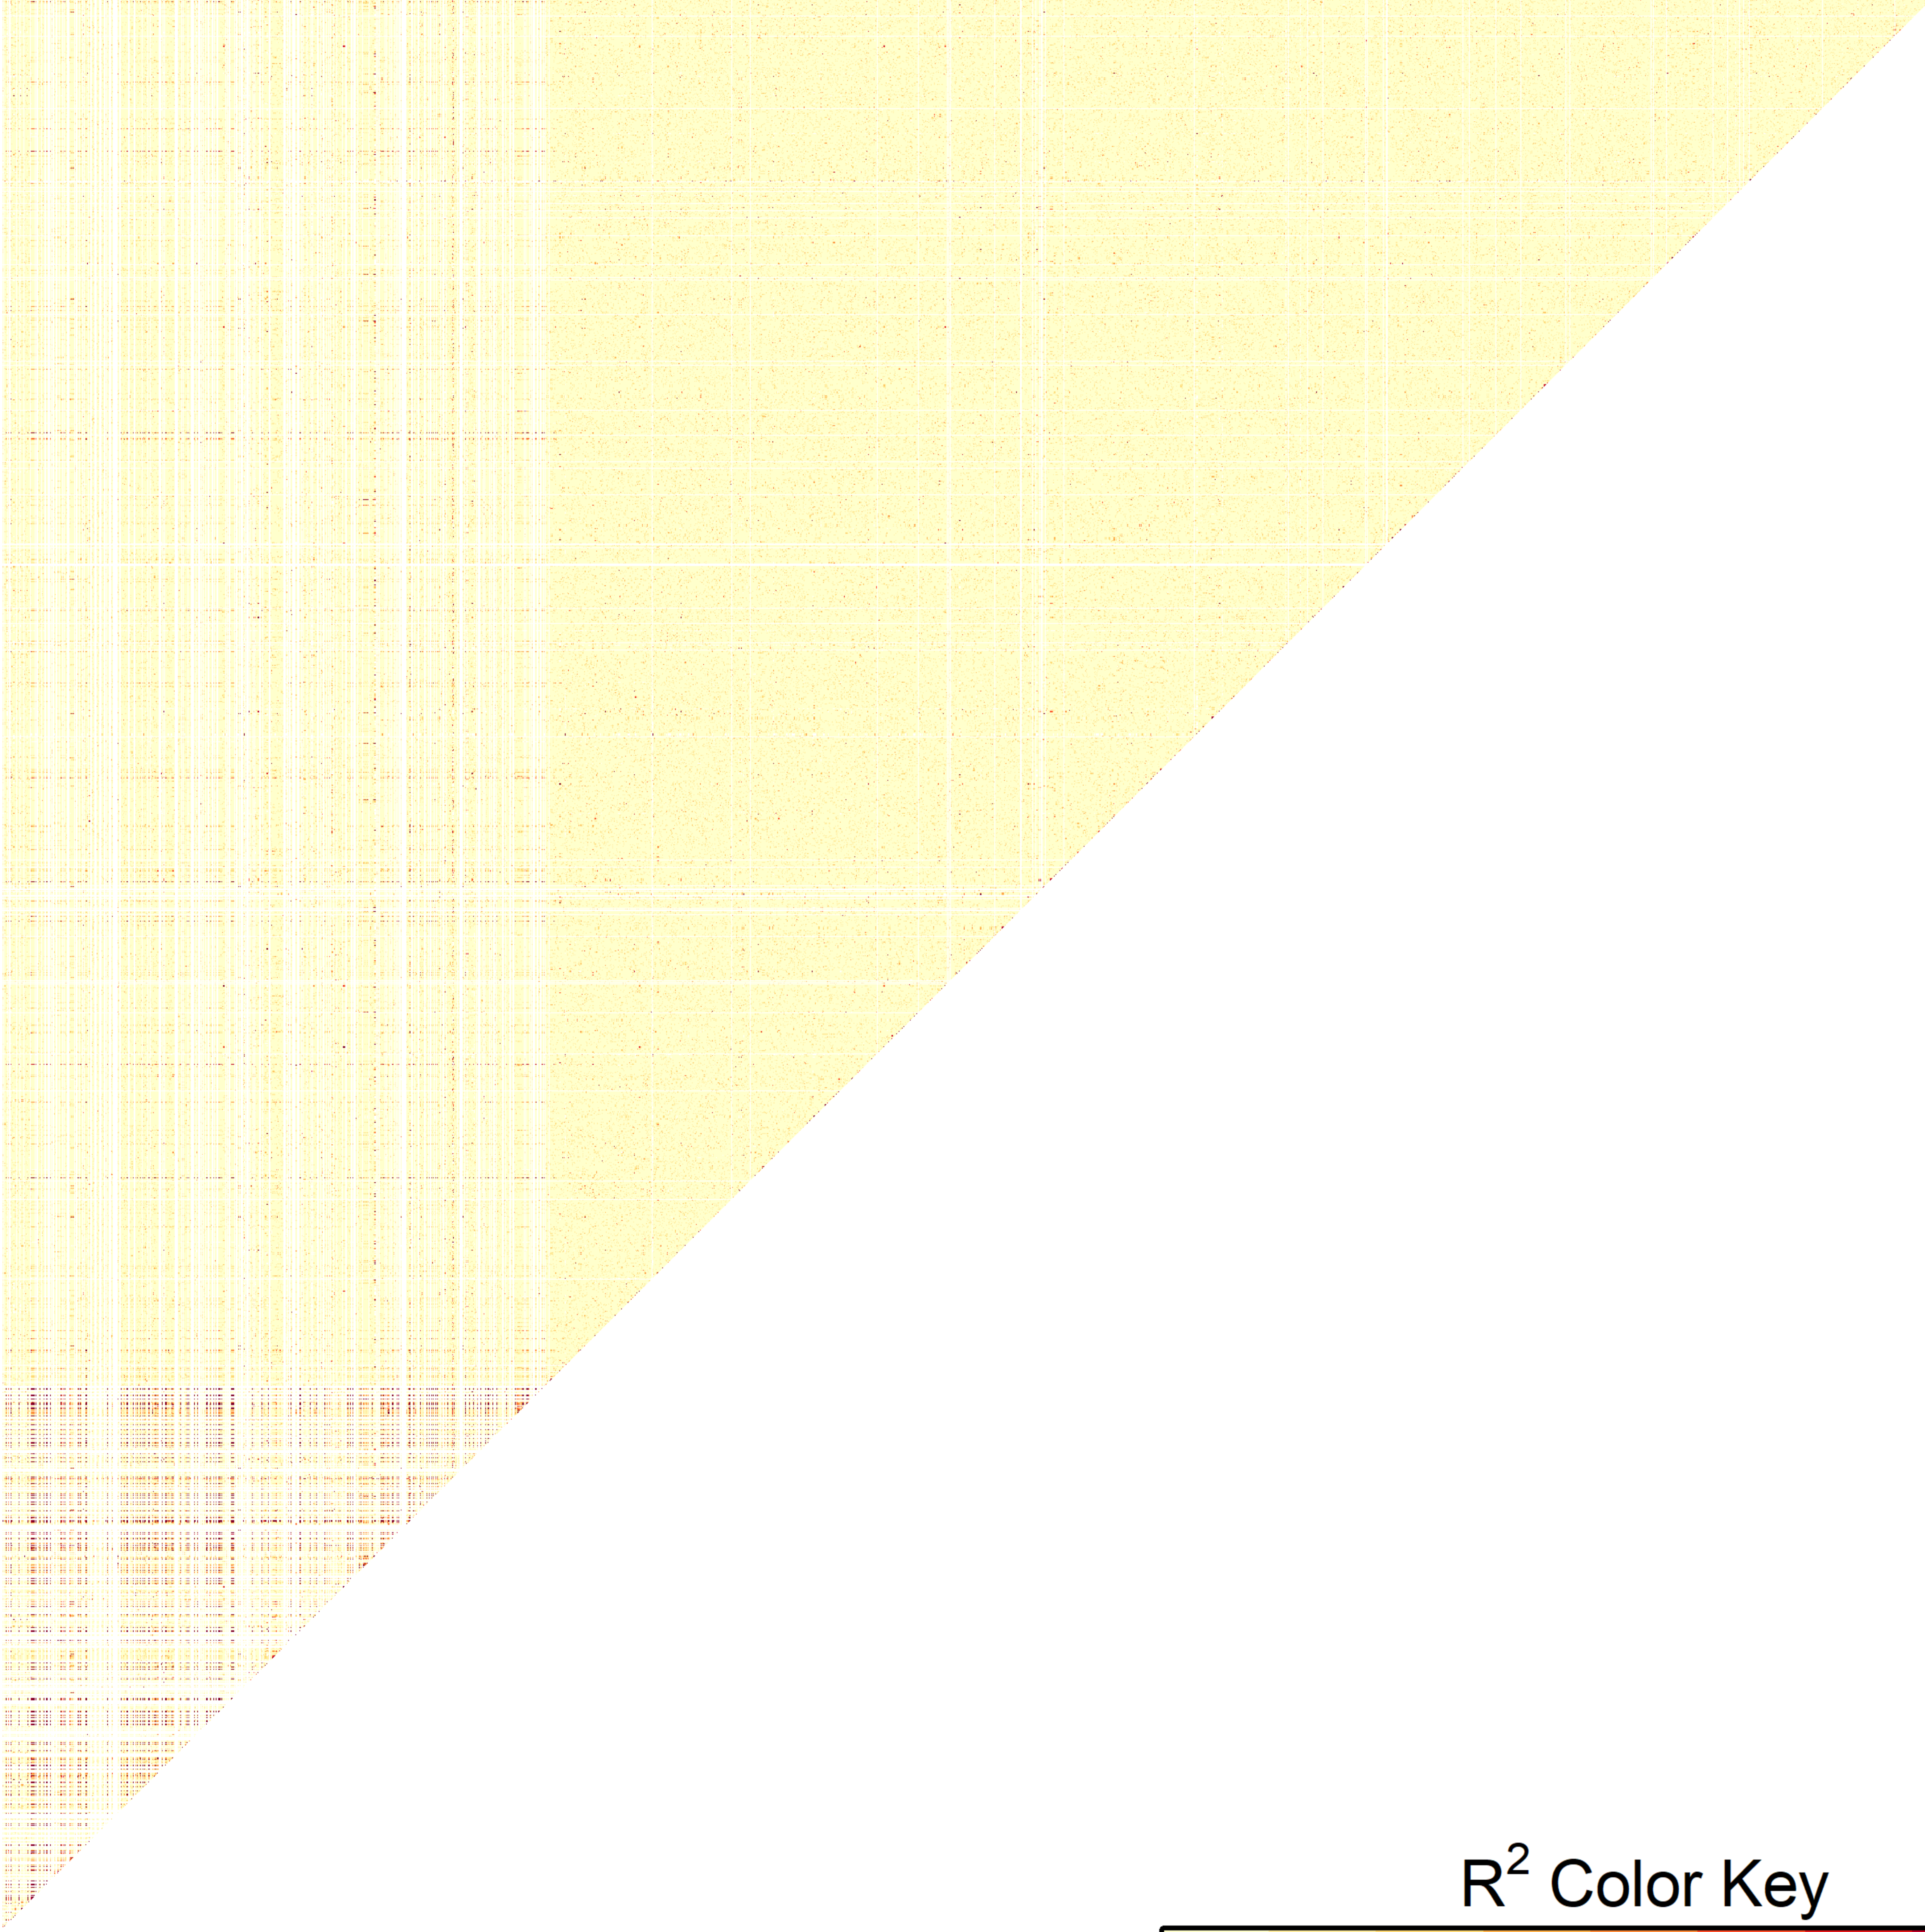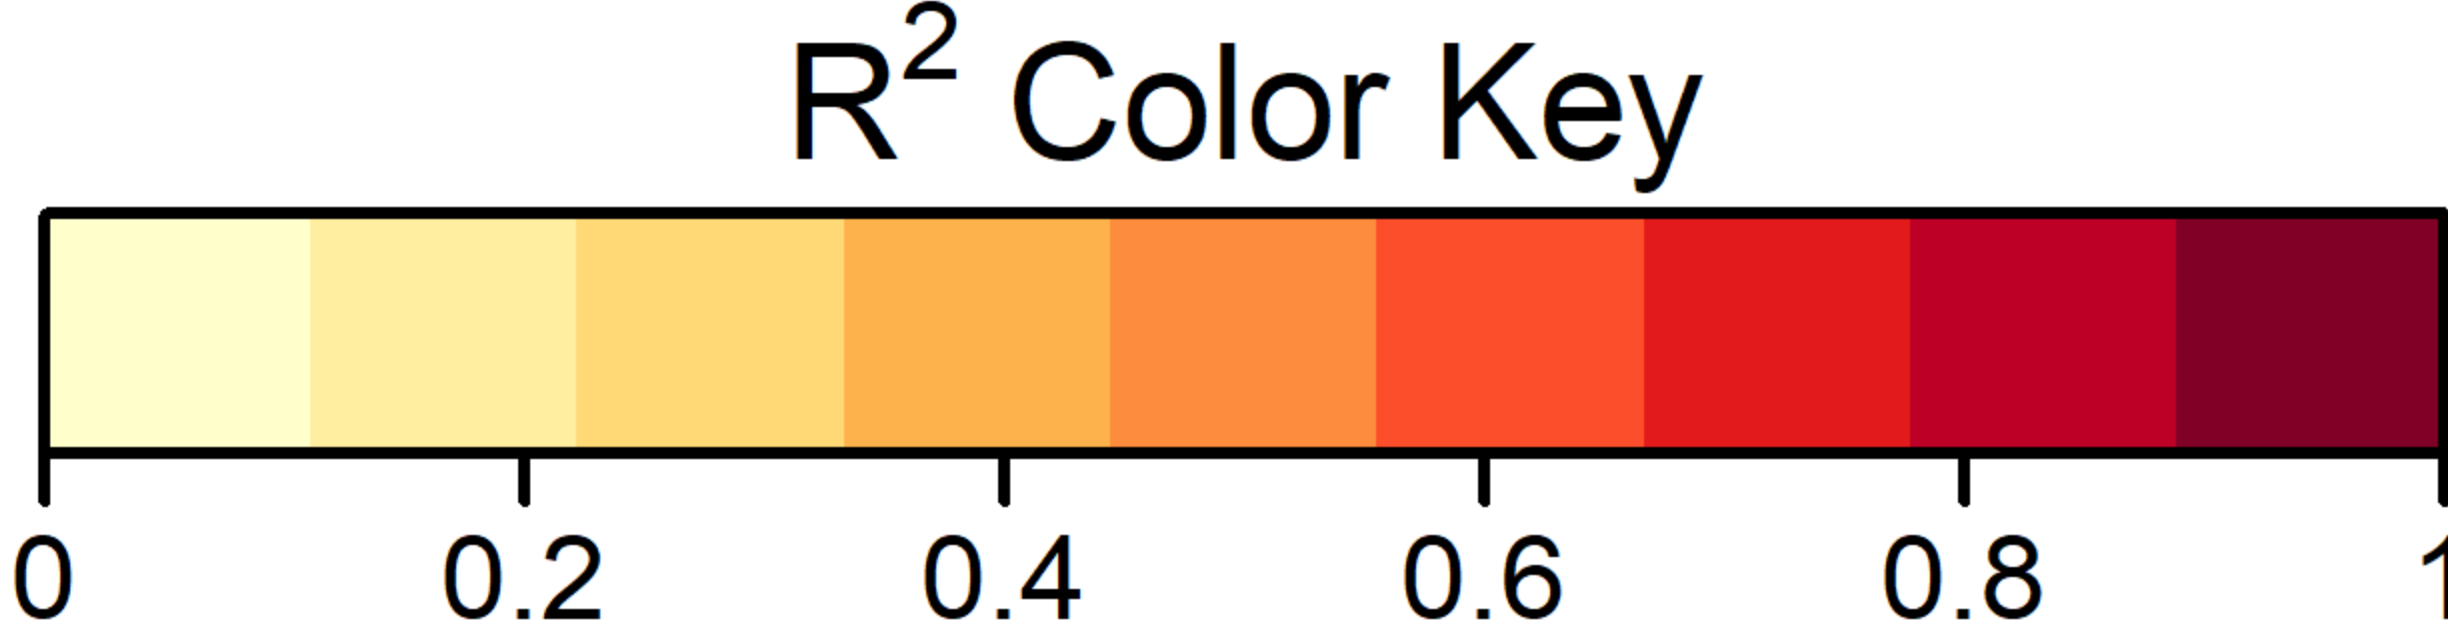



P. maximus - Chromosome 4

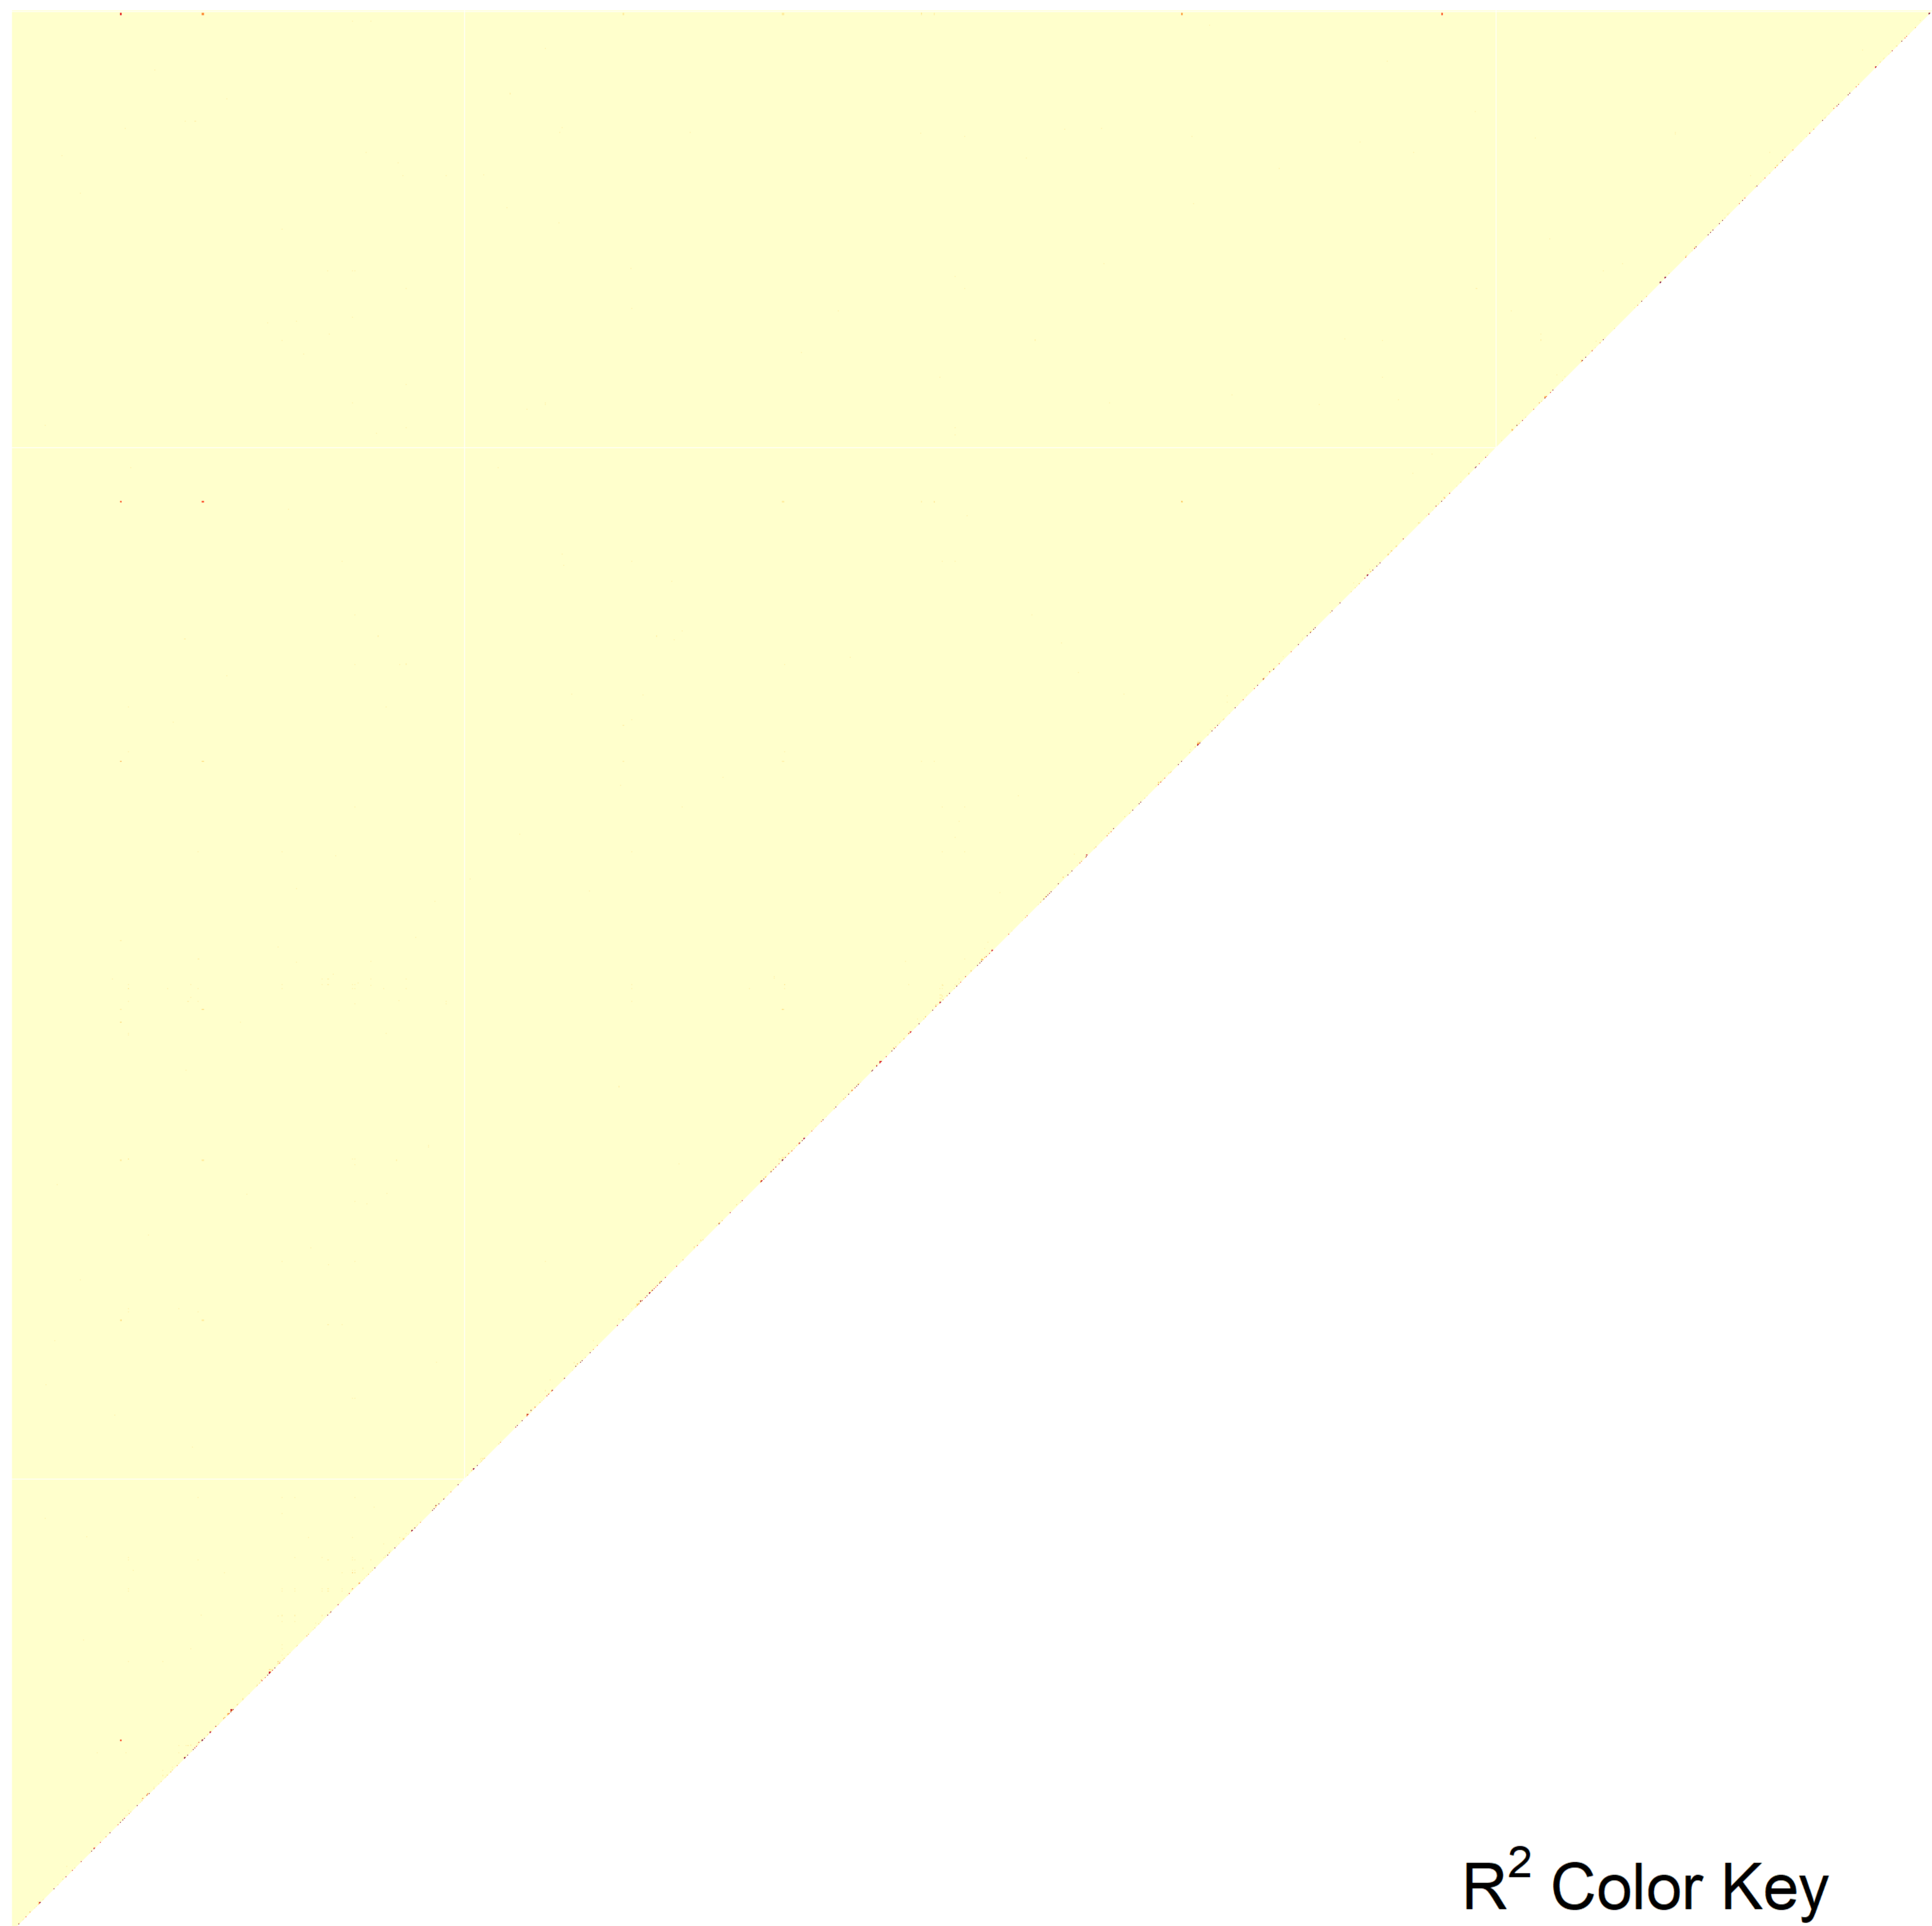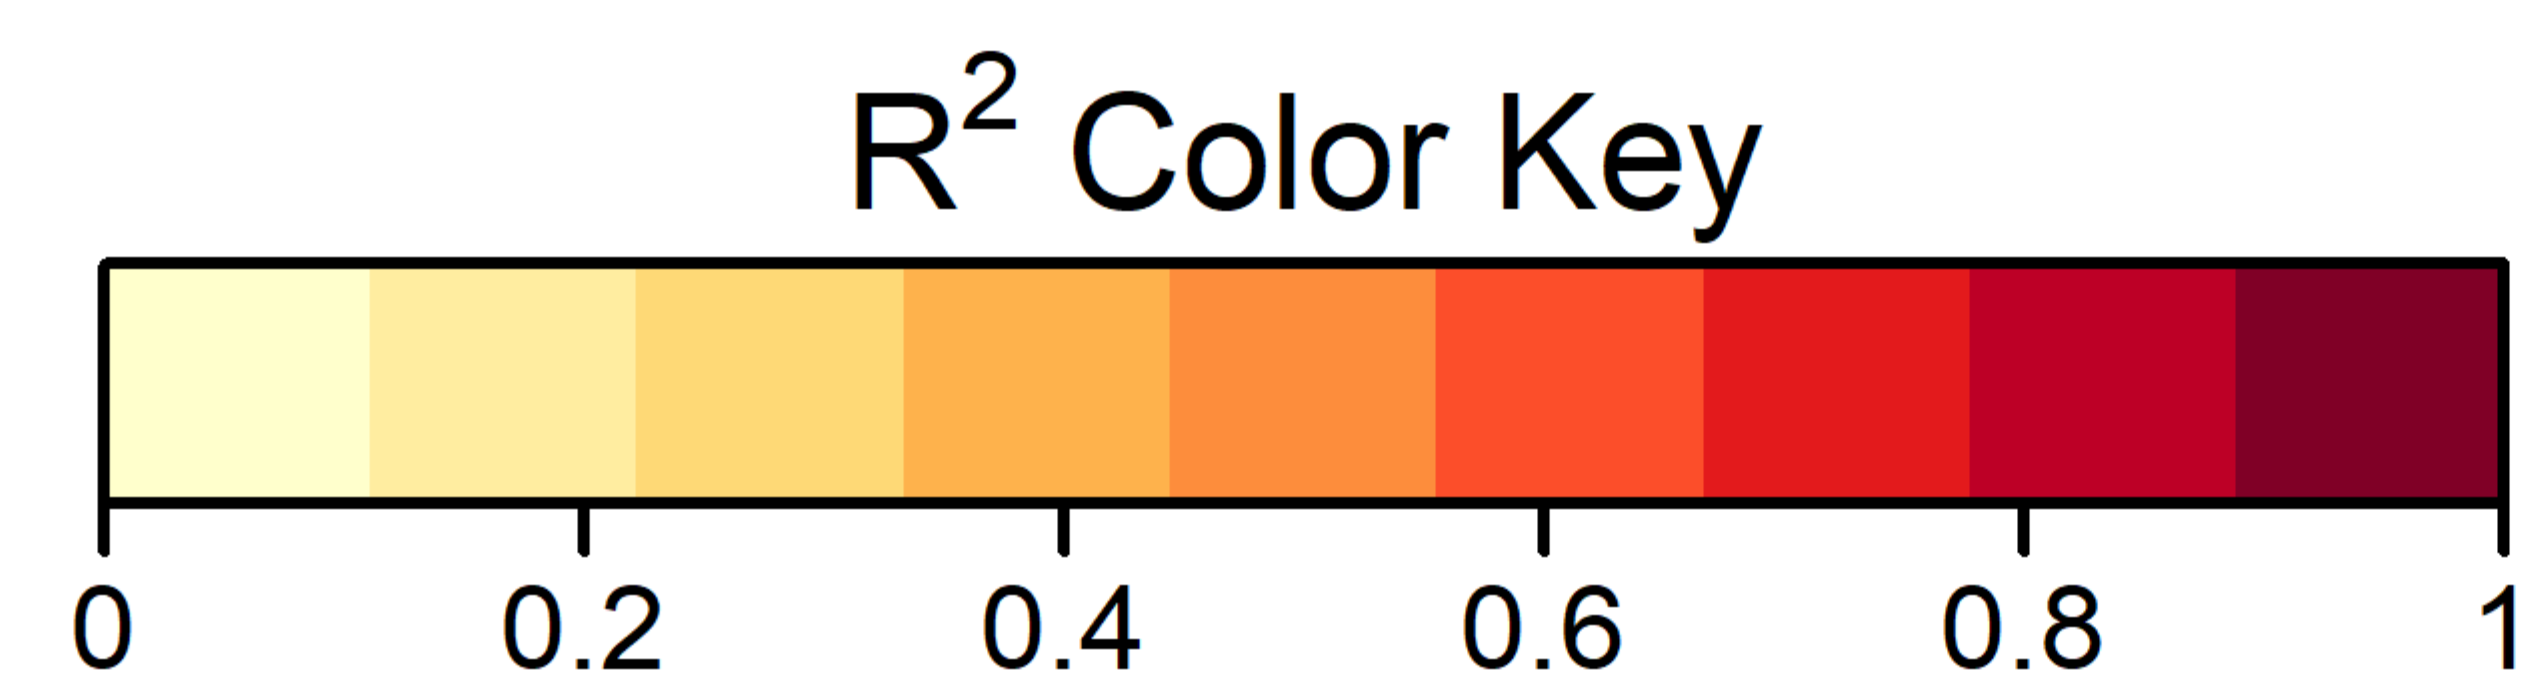

P. jacobaeus - Chromosome 4

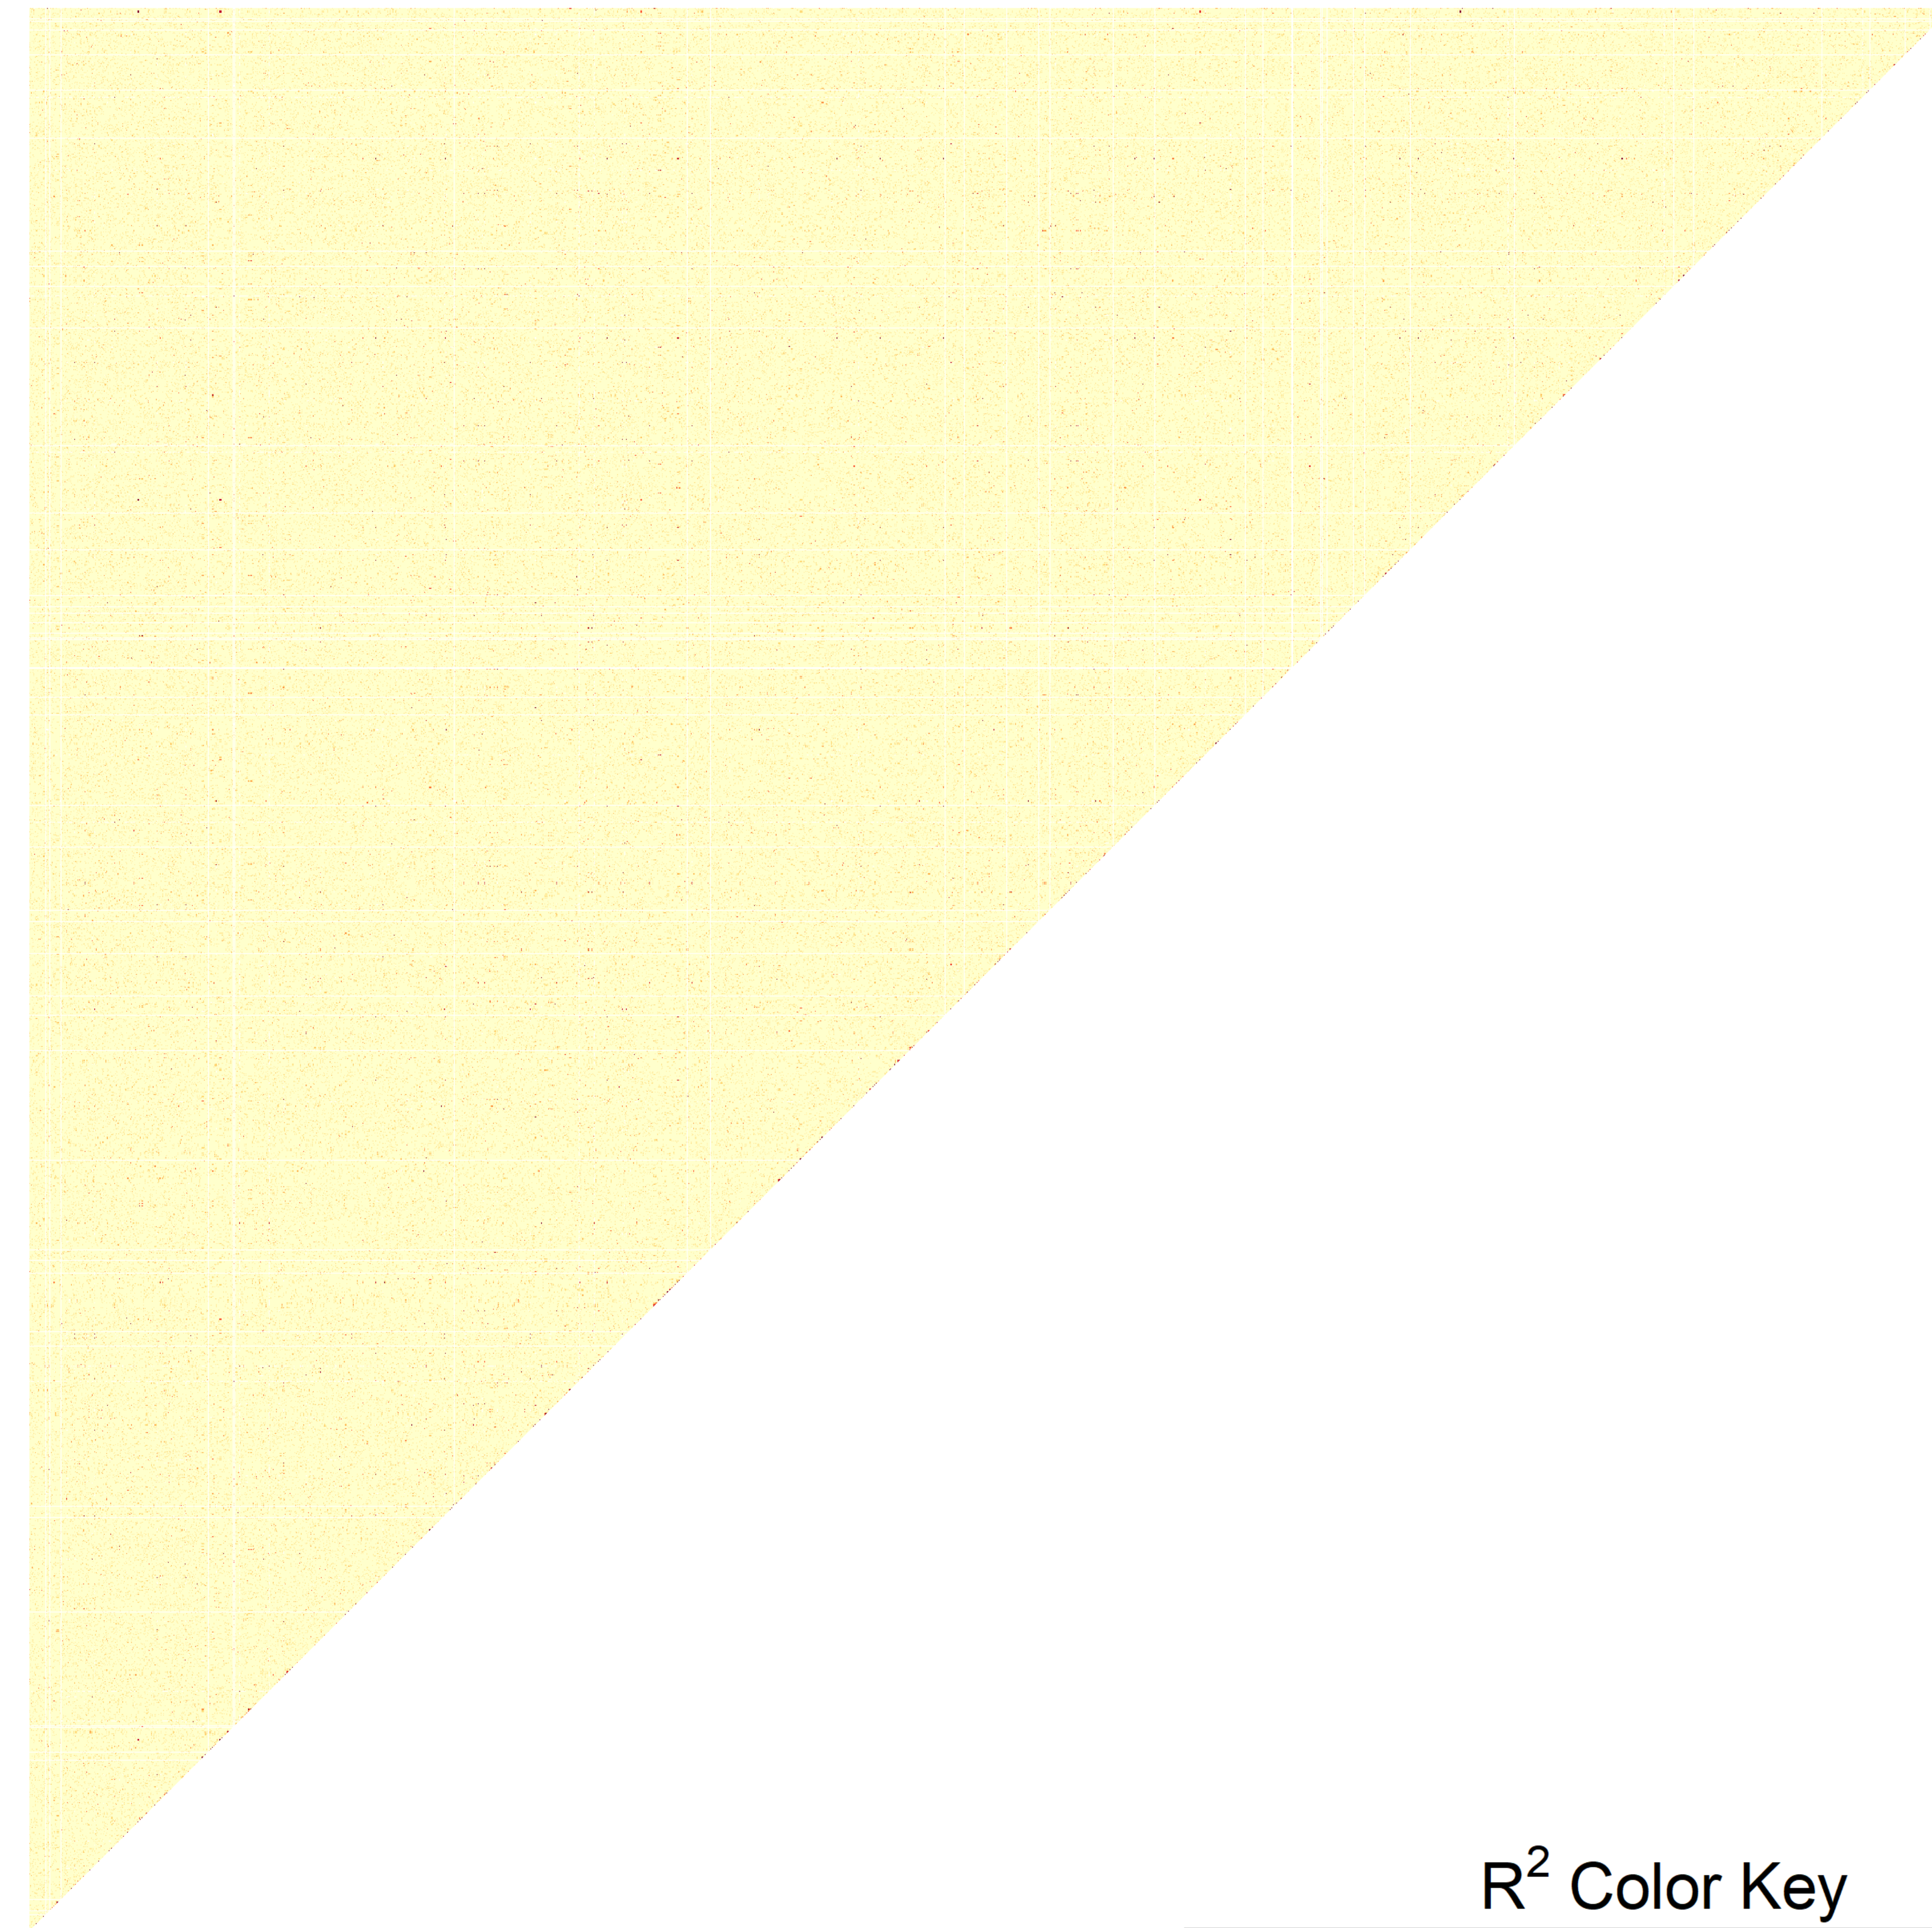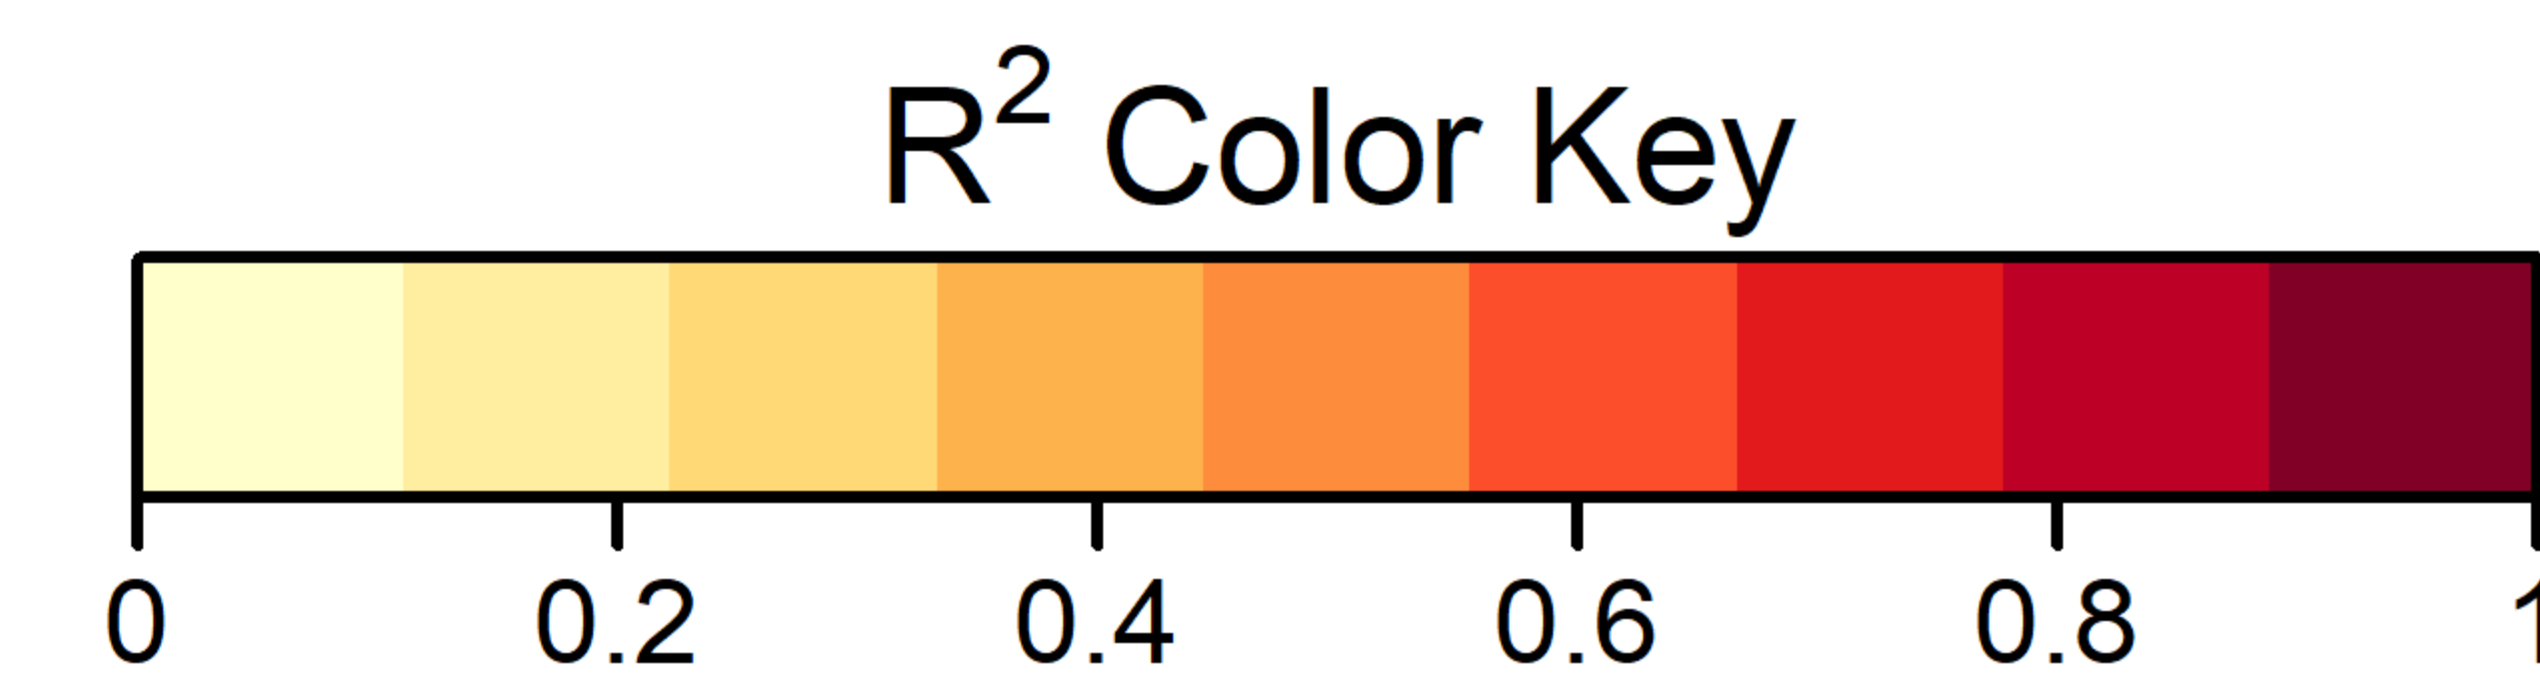



P. maximus - Chromosome 5

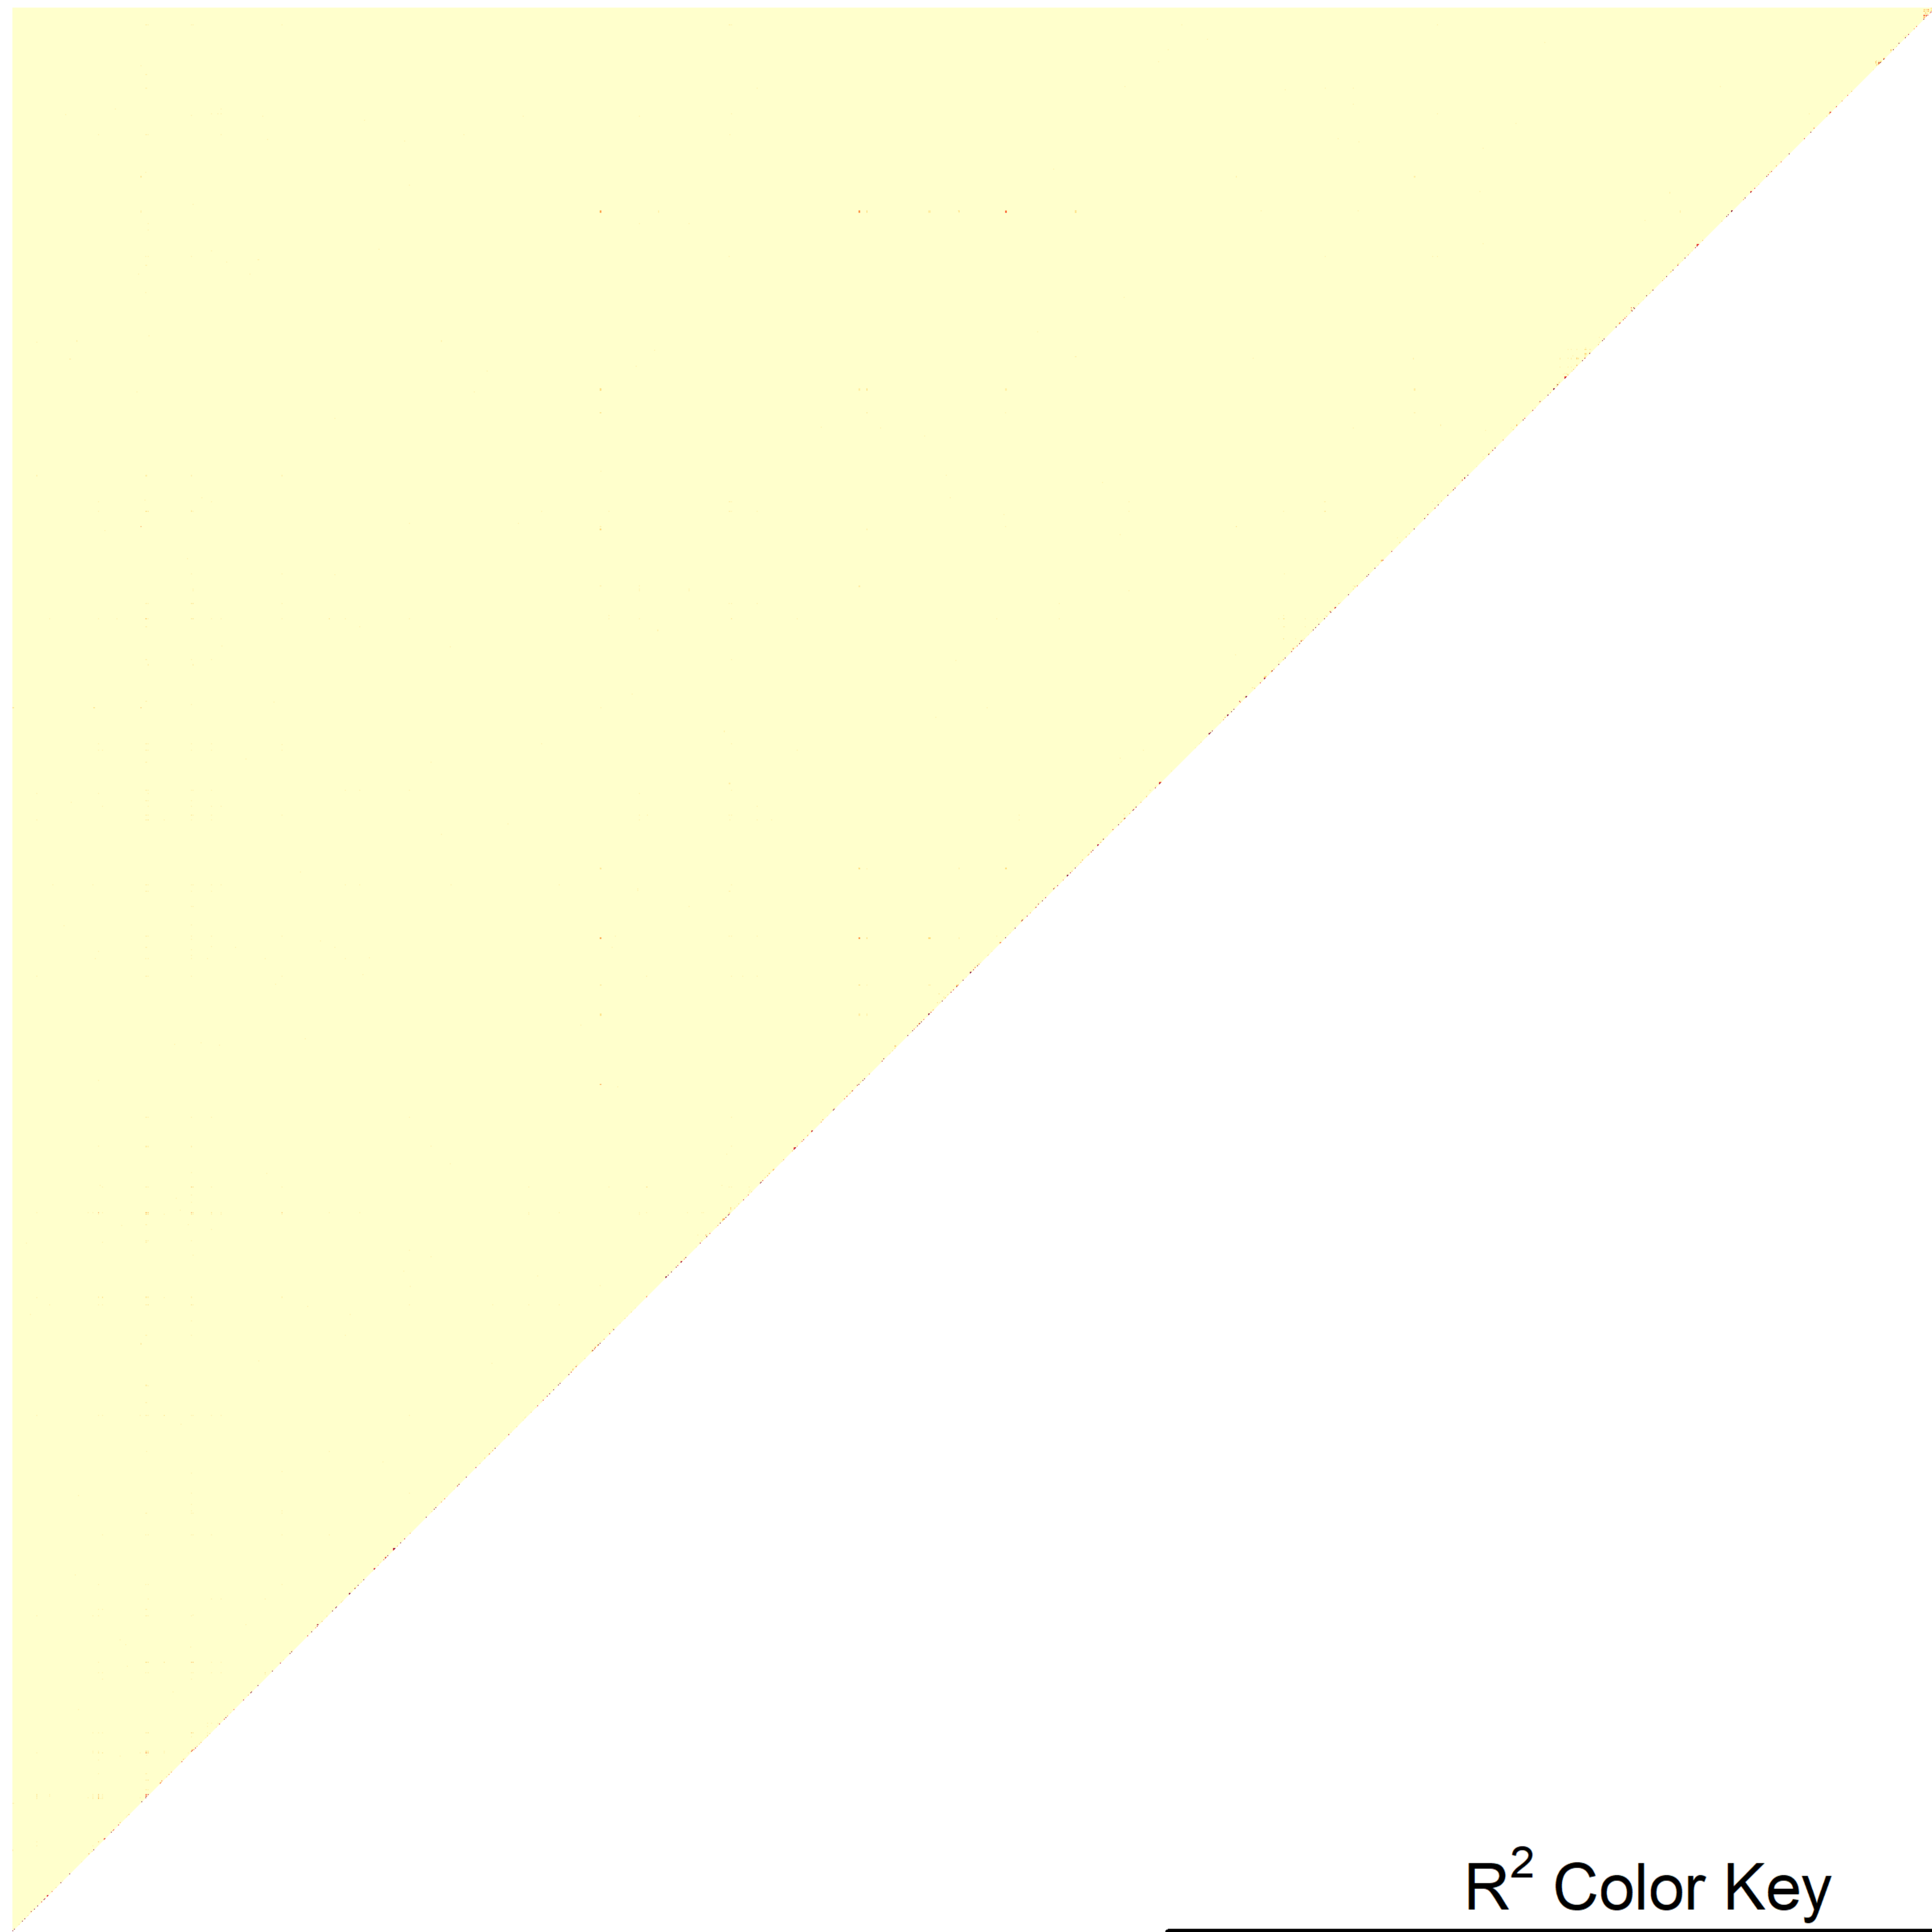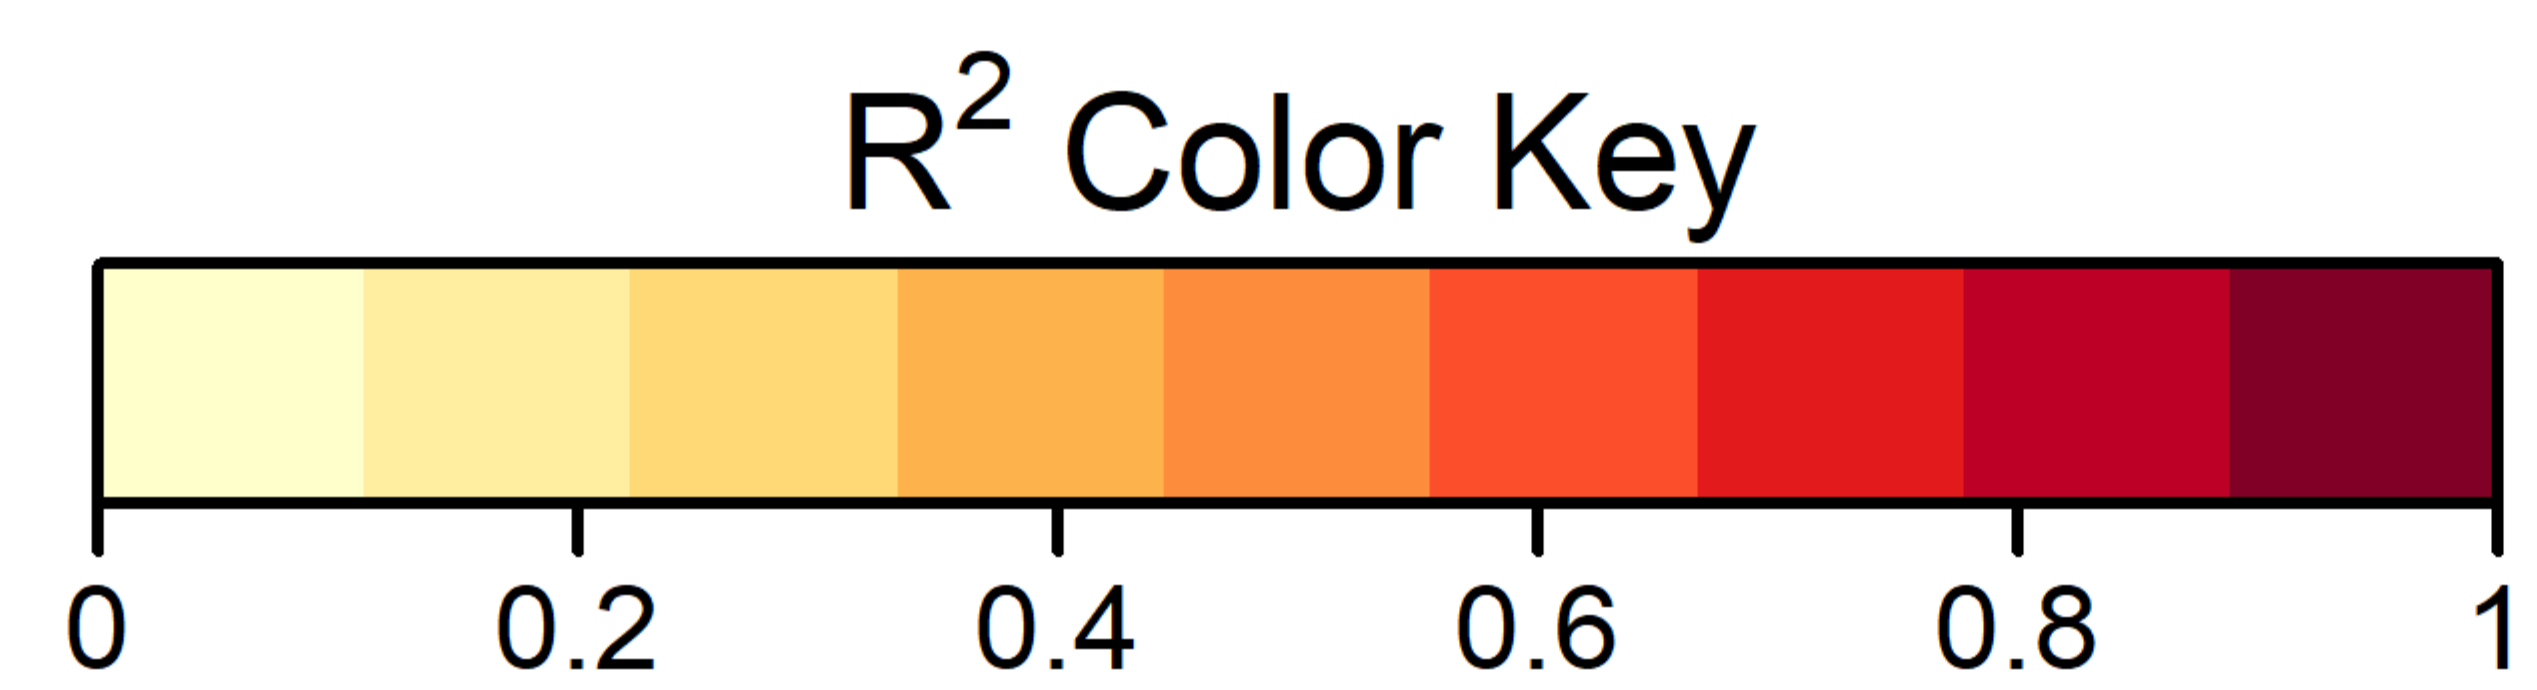

P. jacobaeus - Chromosome 5

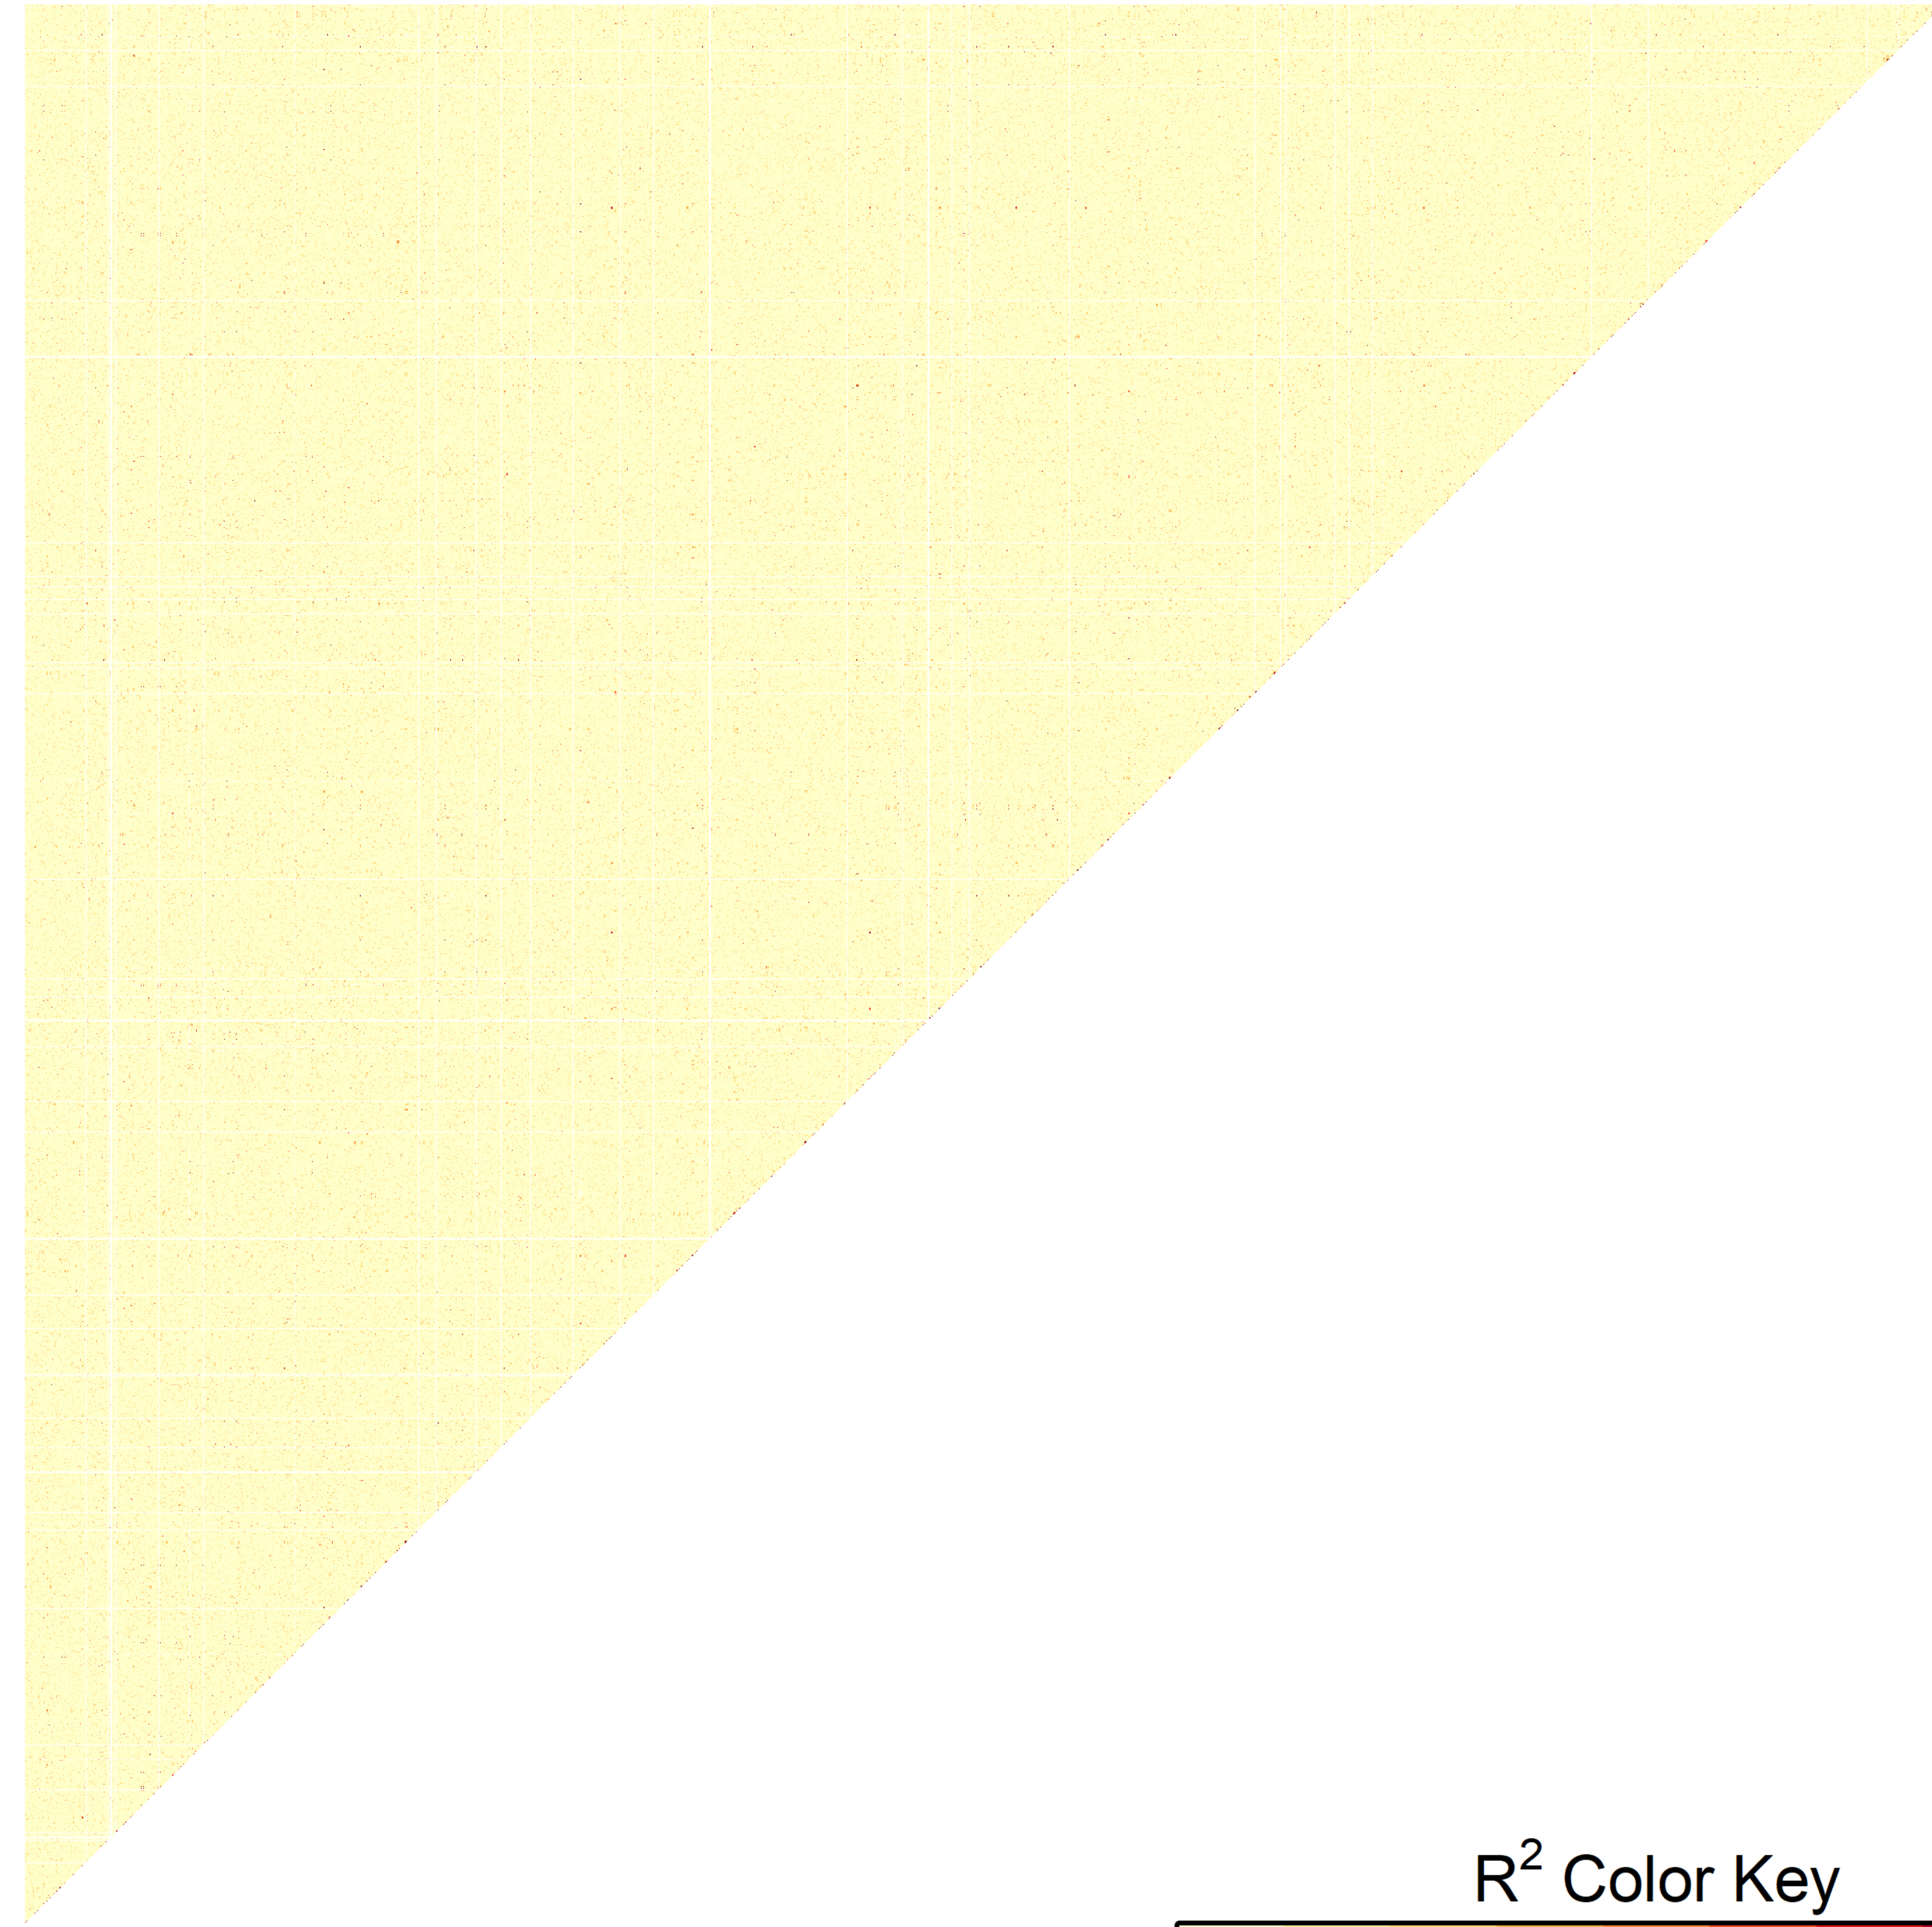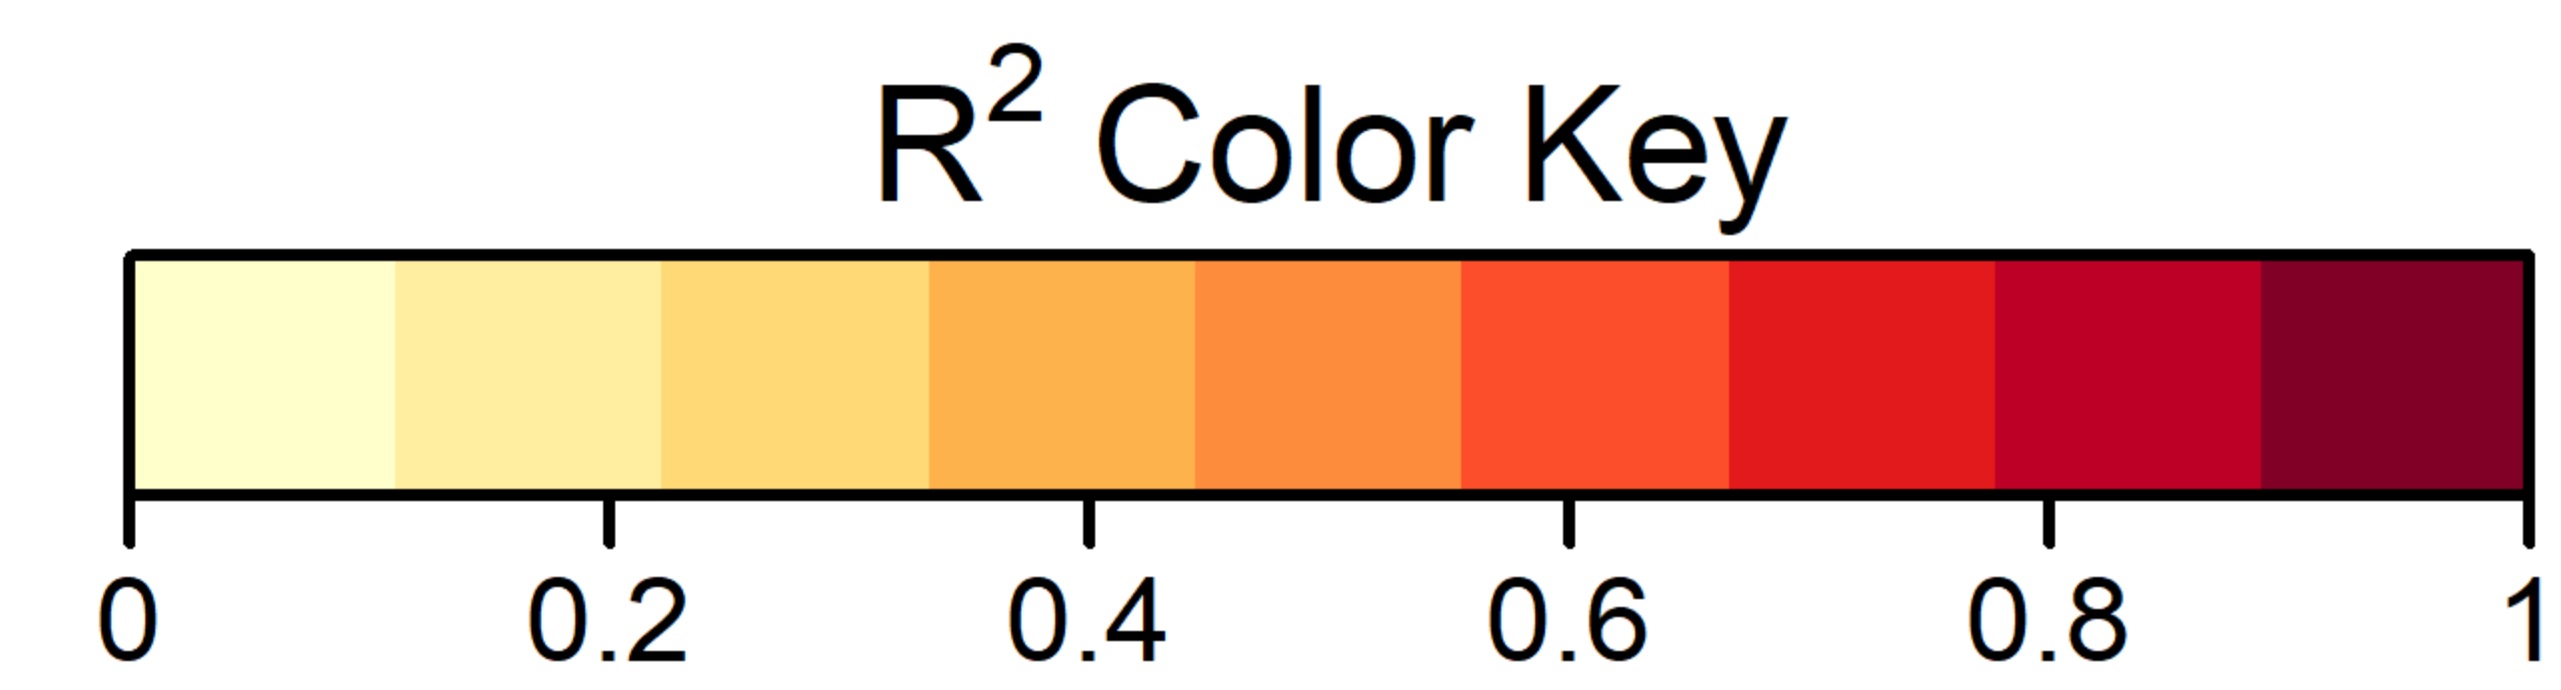



P. maximus - Chromosome 6

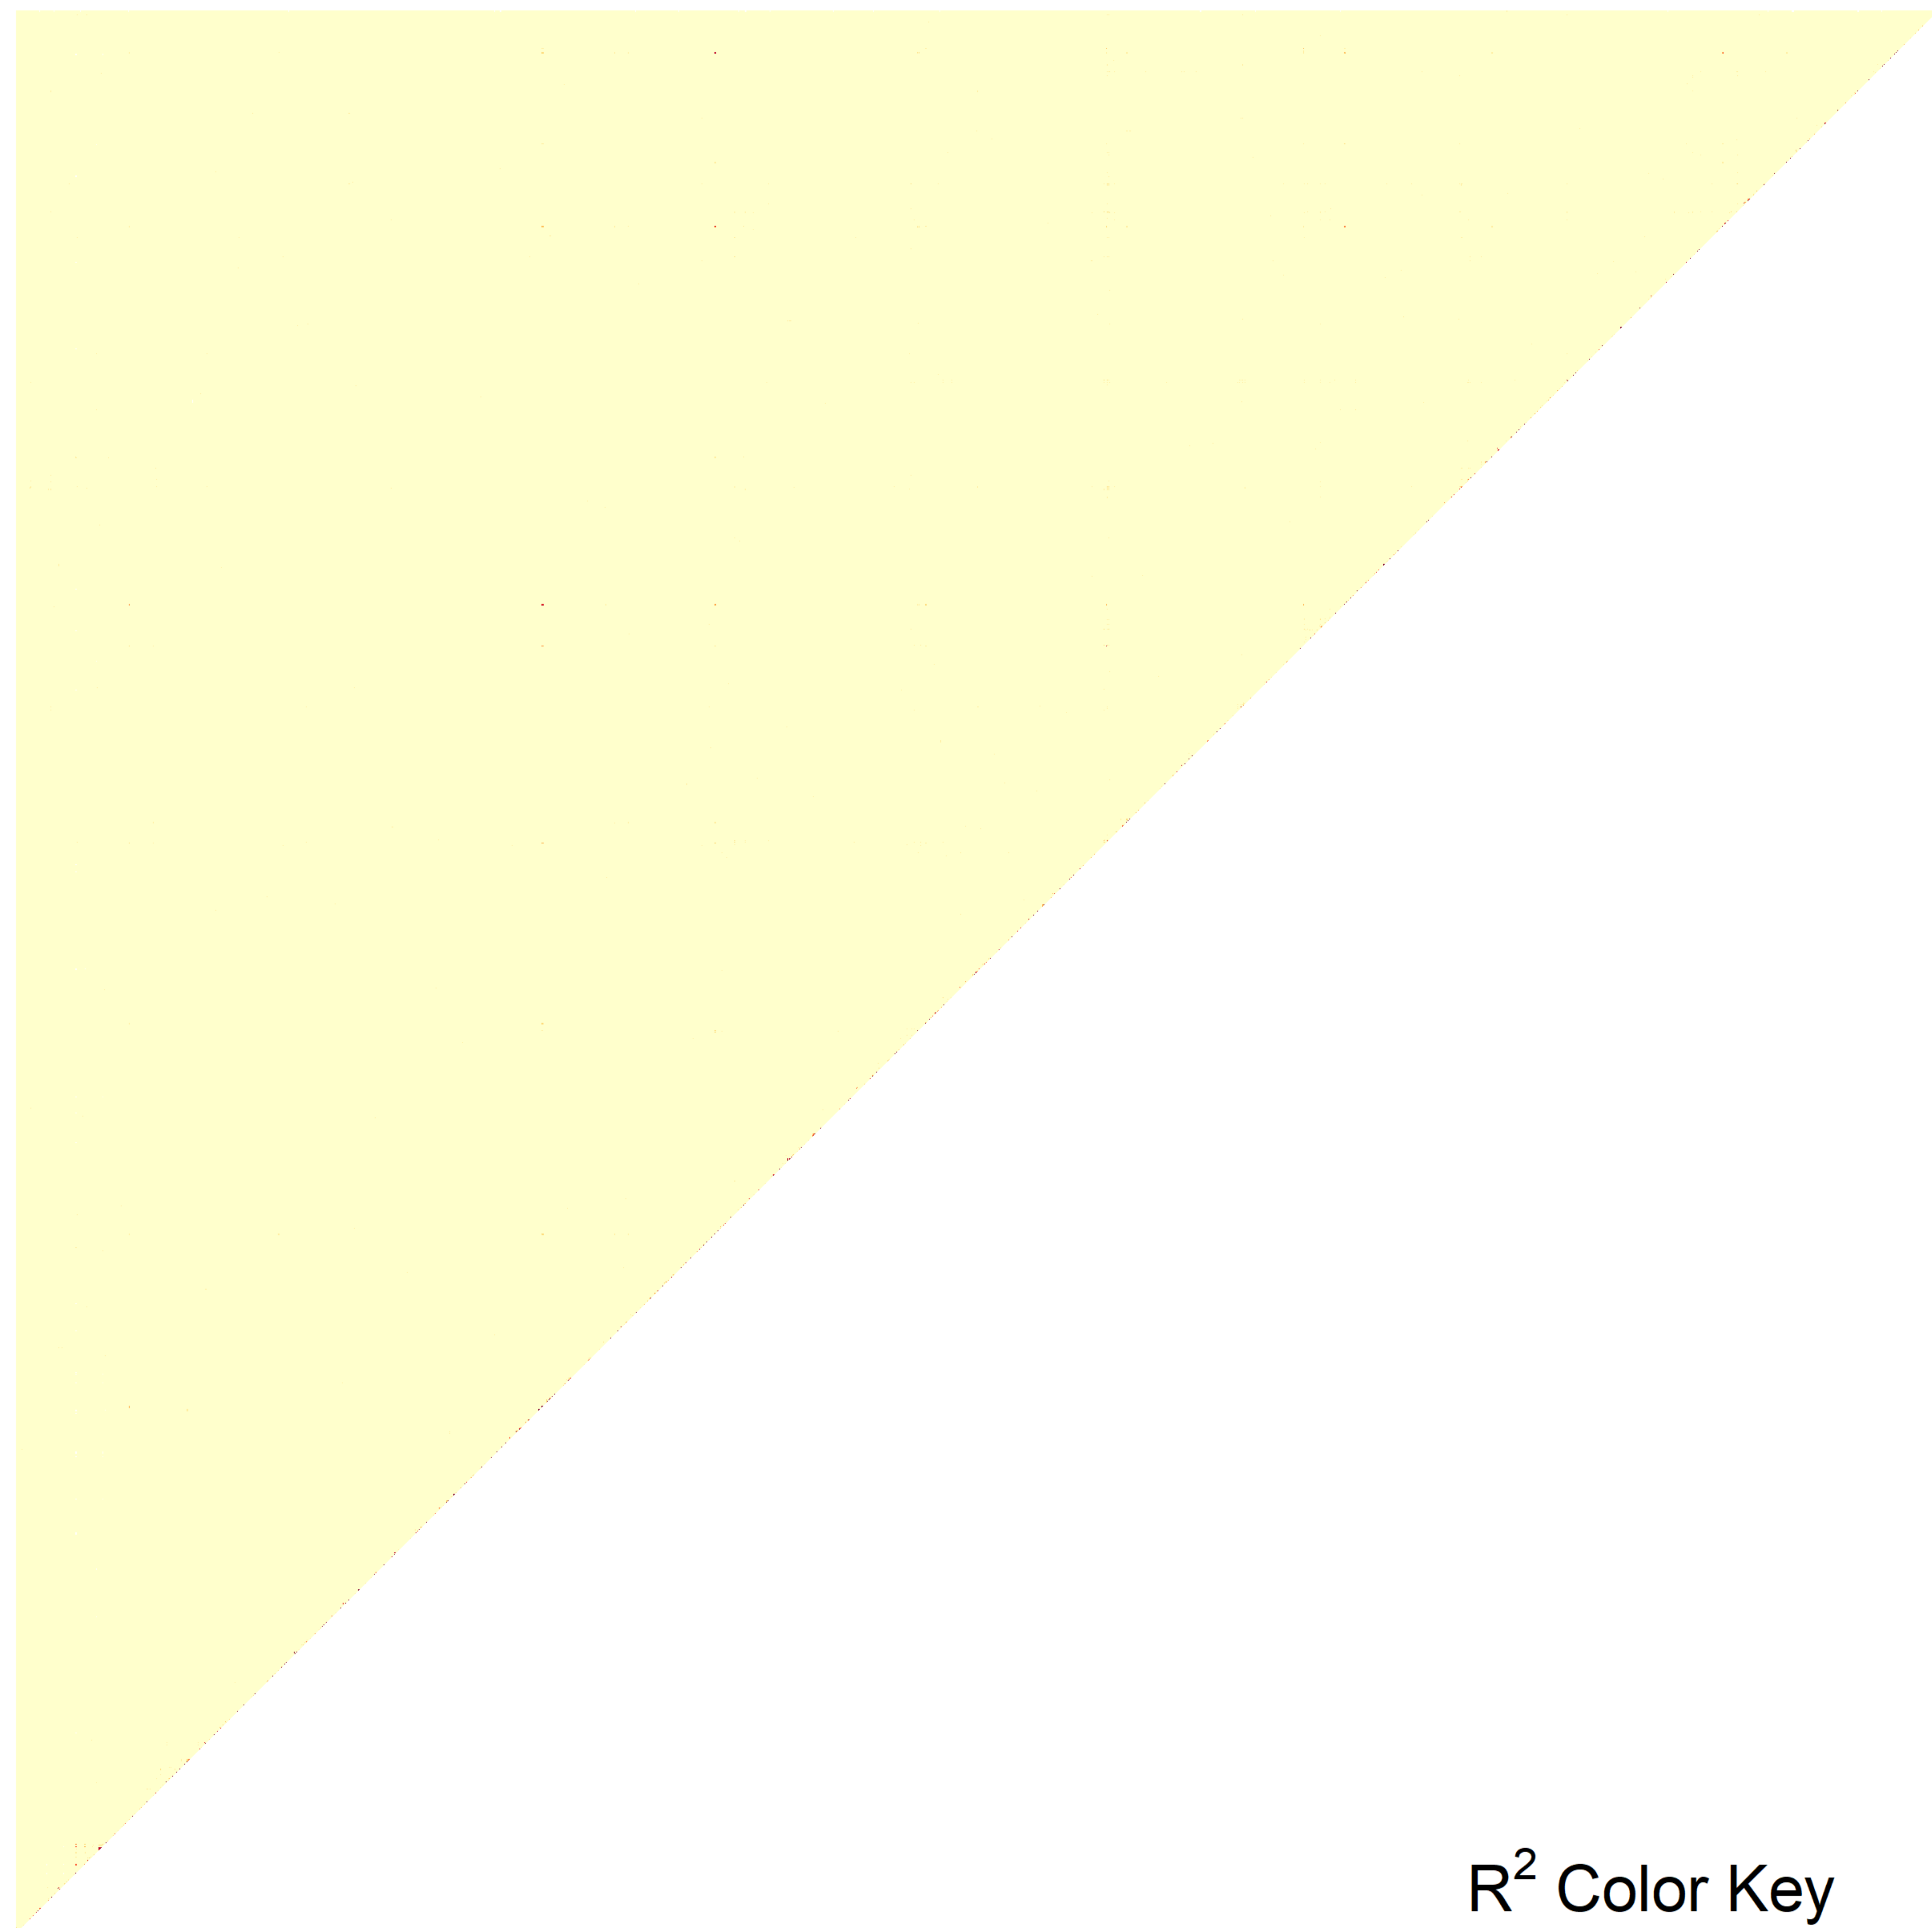

P. jacobaeus - Chromosome 6

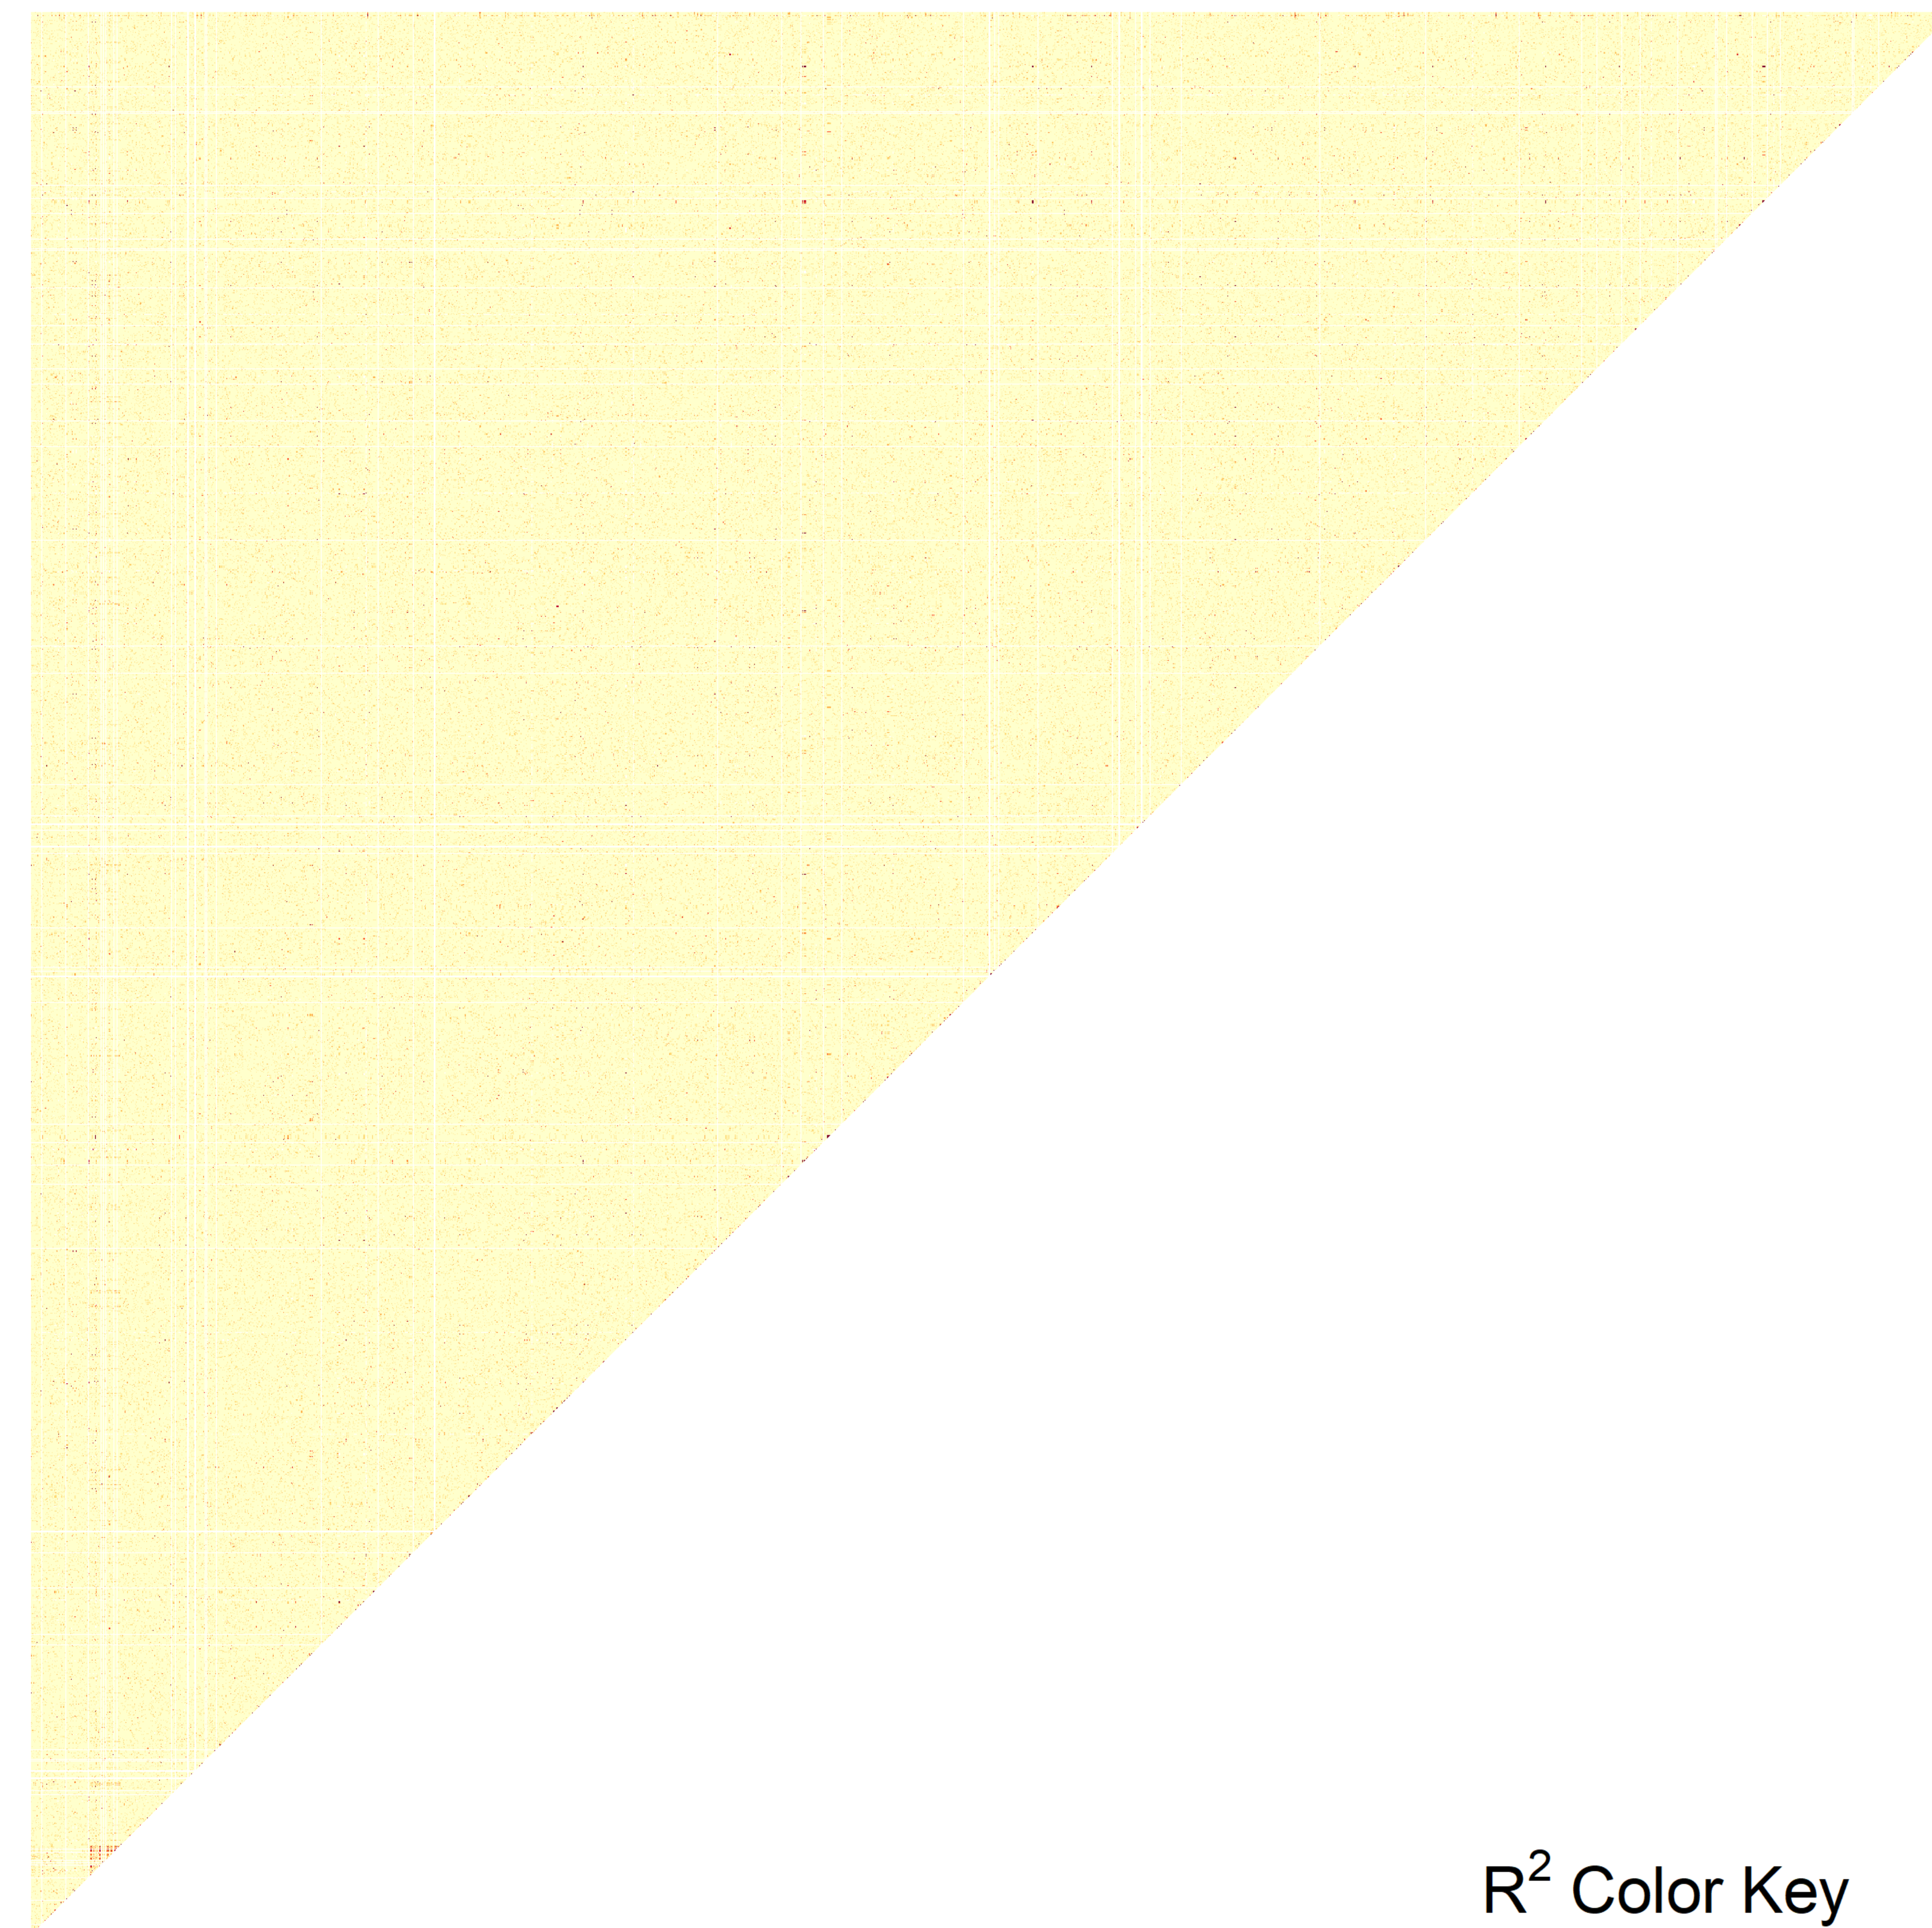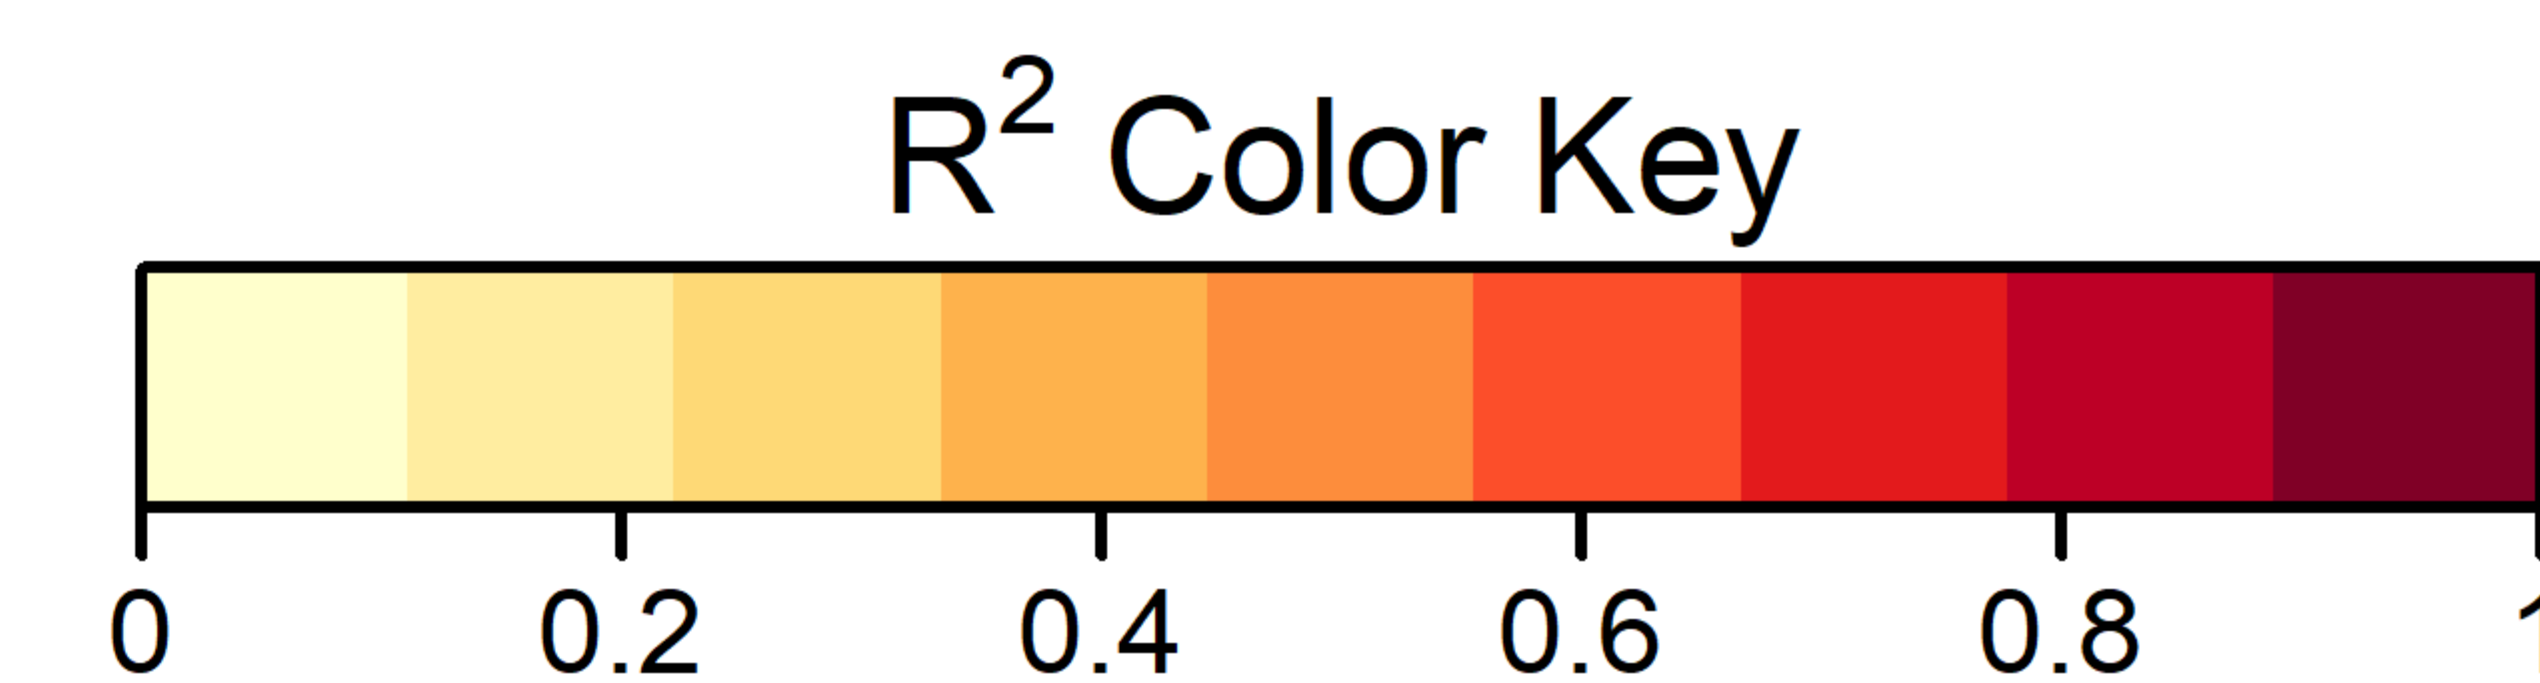



P. maximus - Chromosome 7

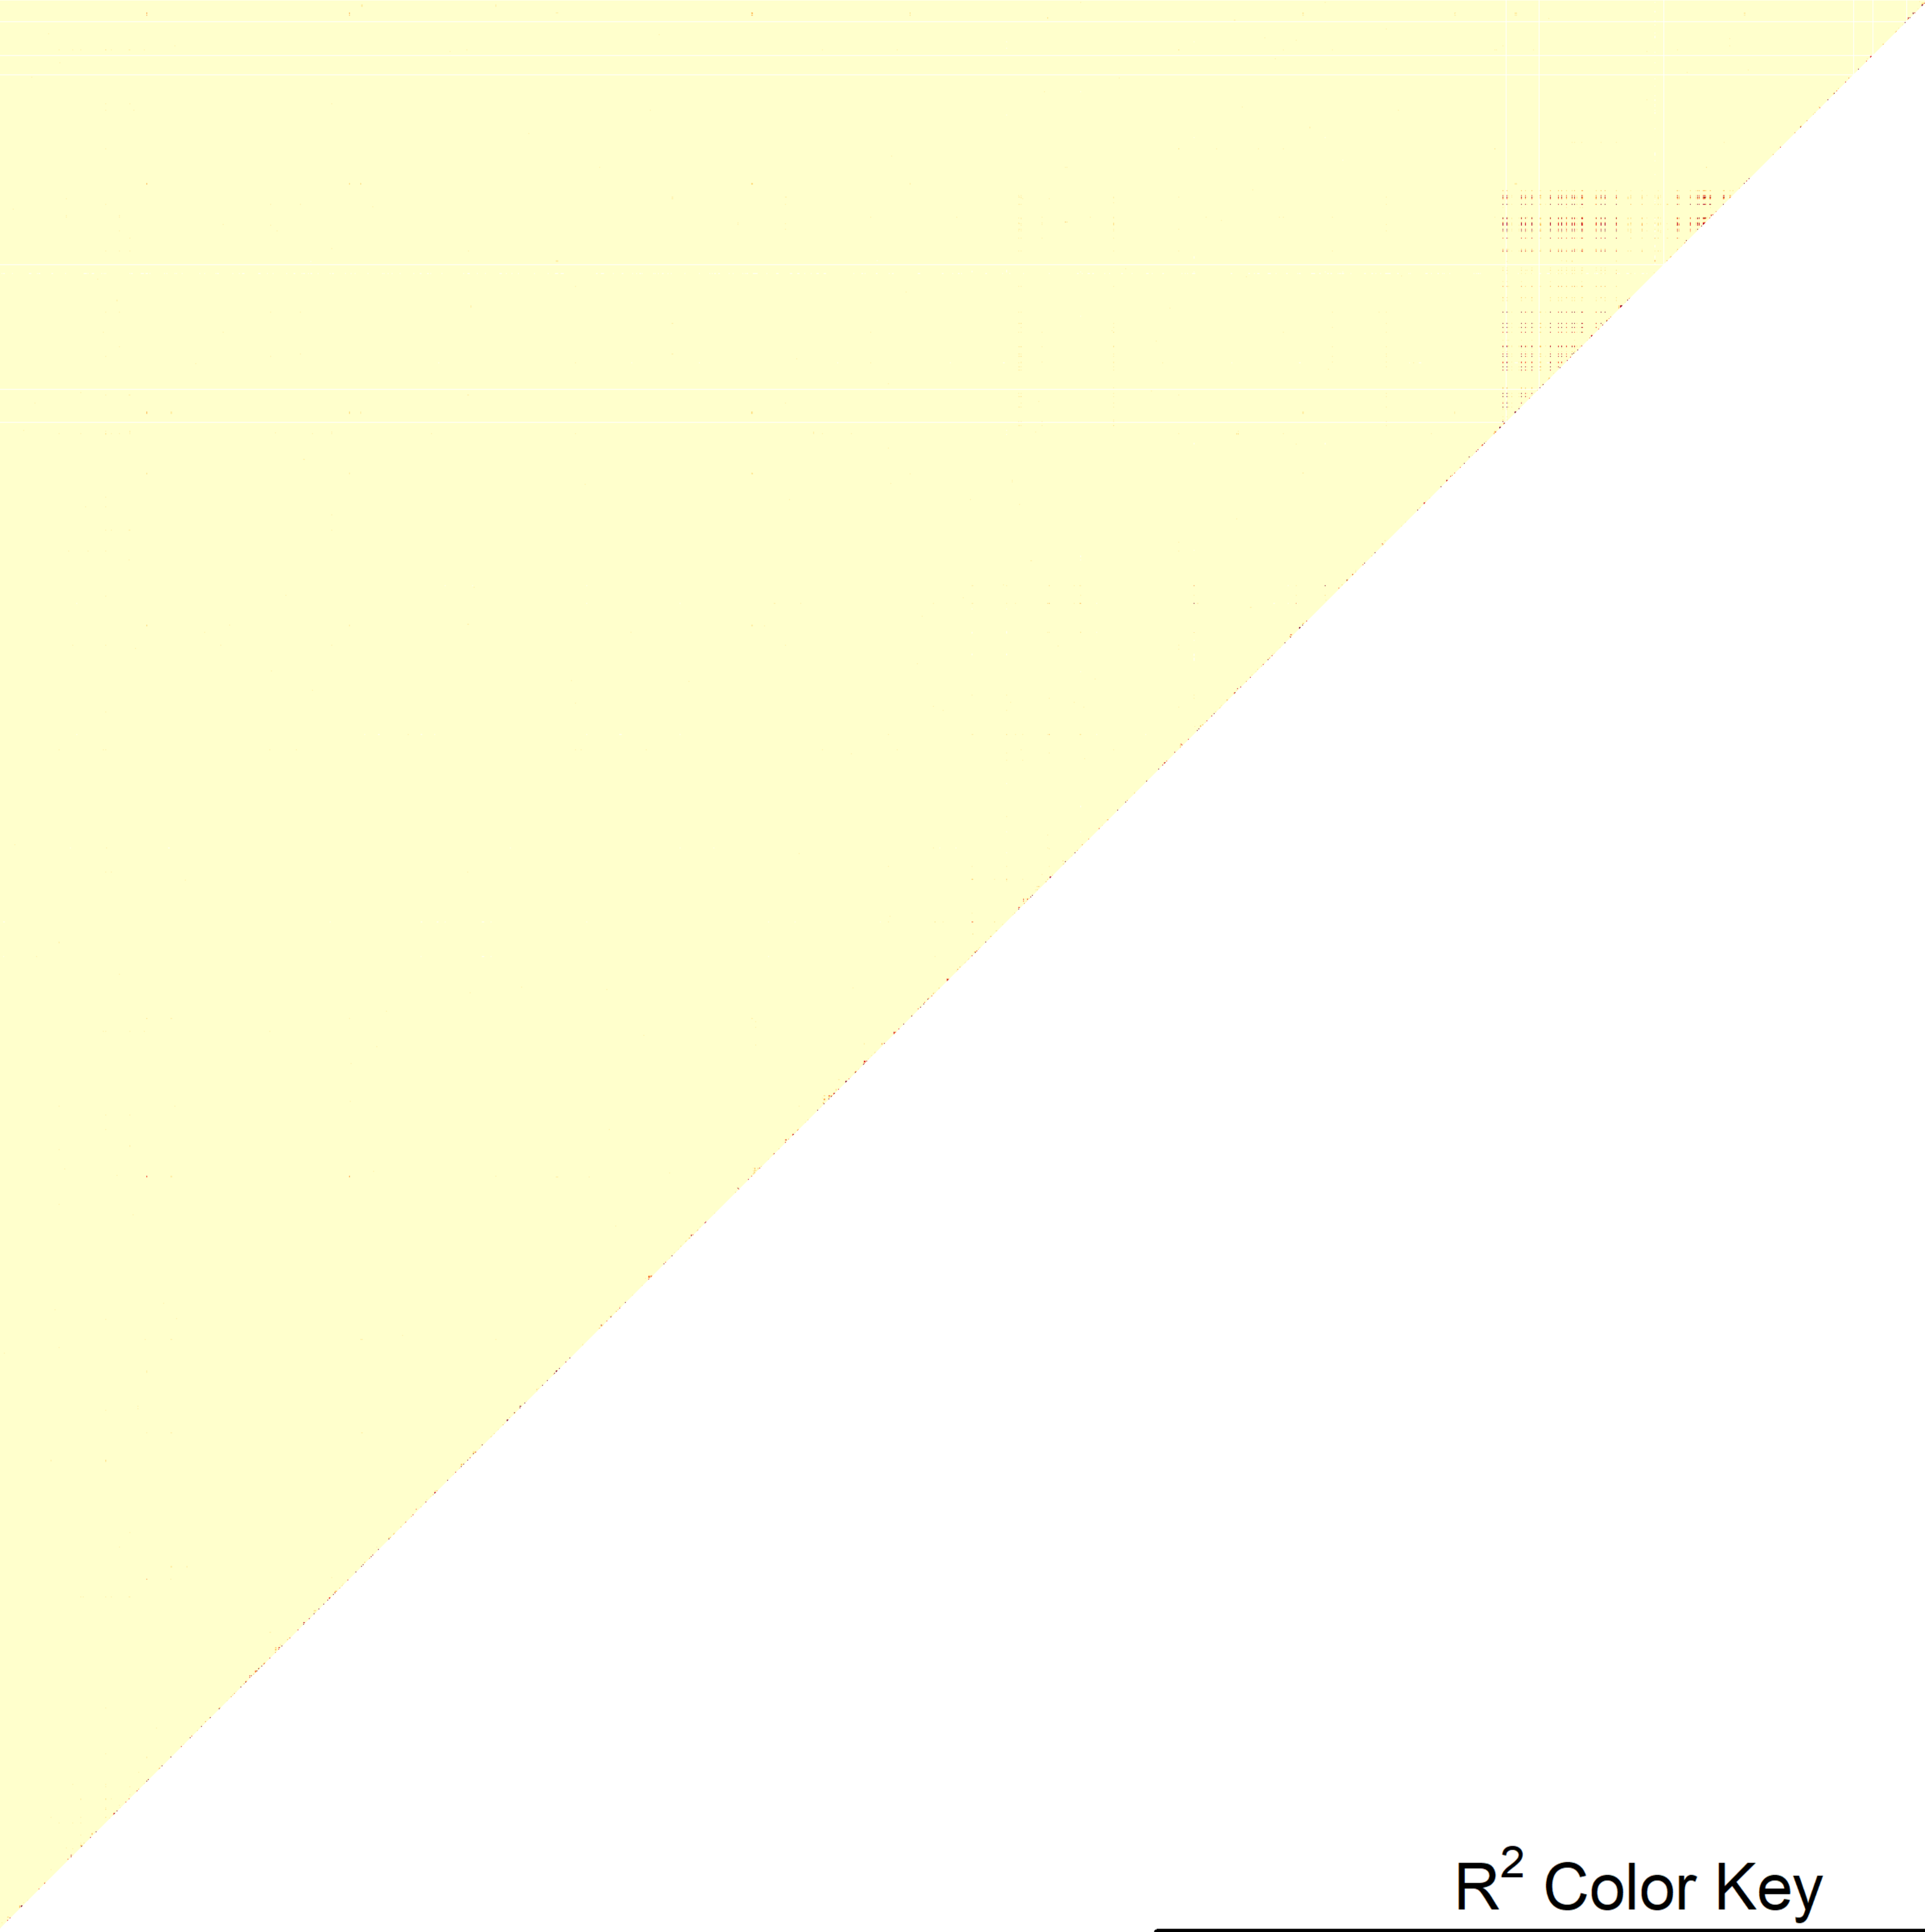

P. jacobaeus - Chromosome 7

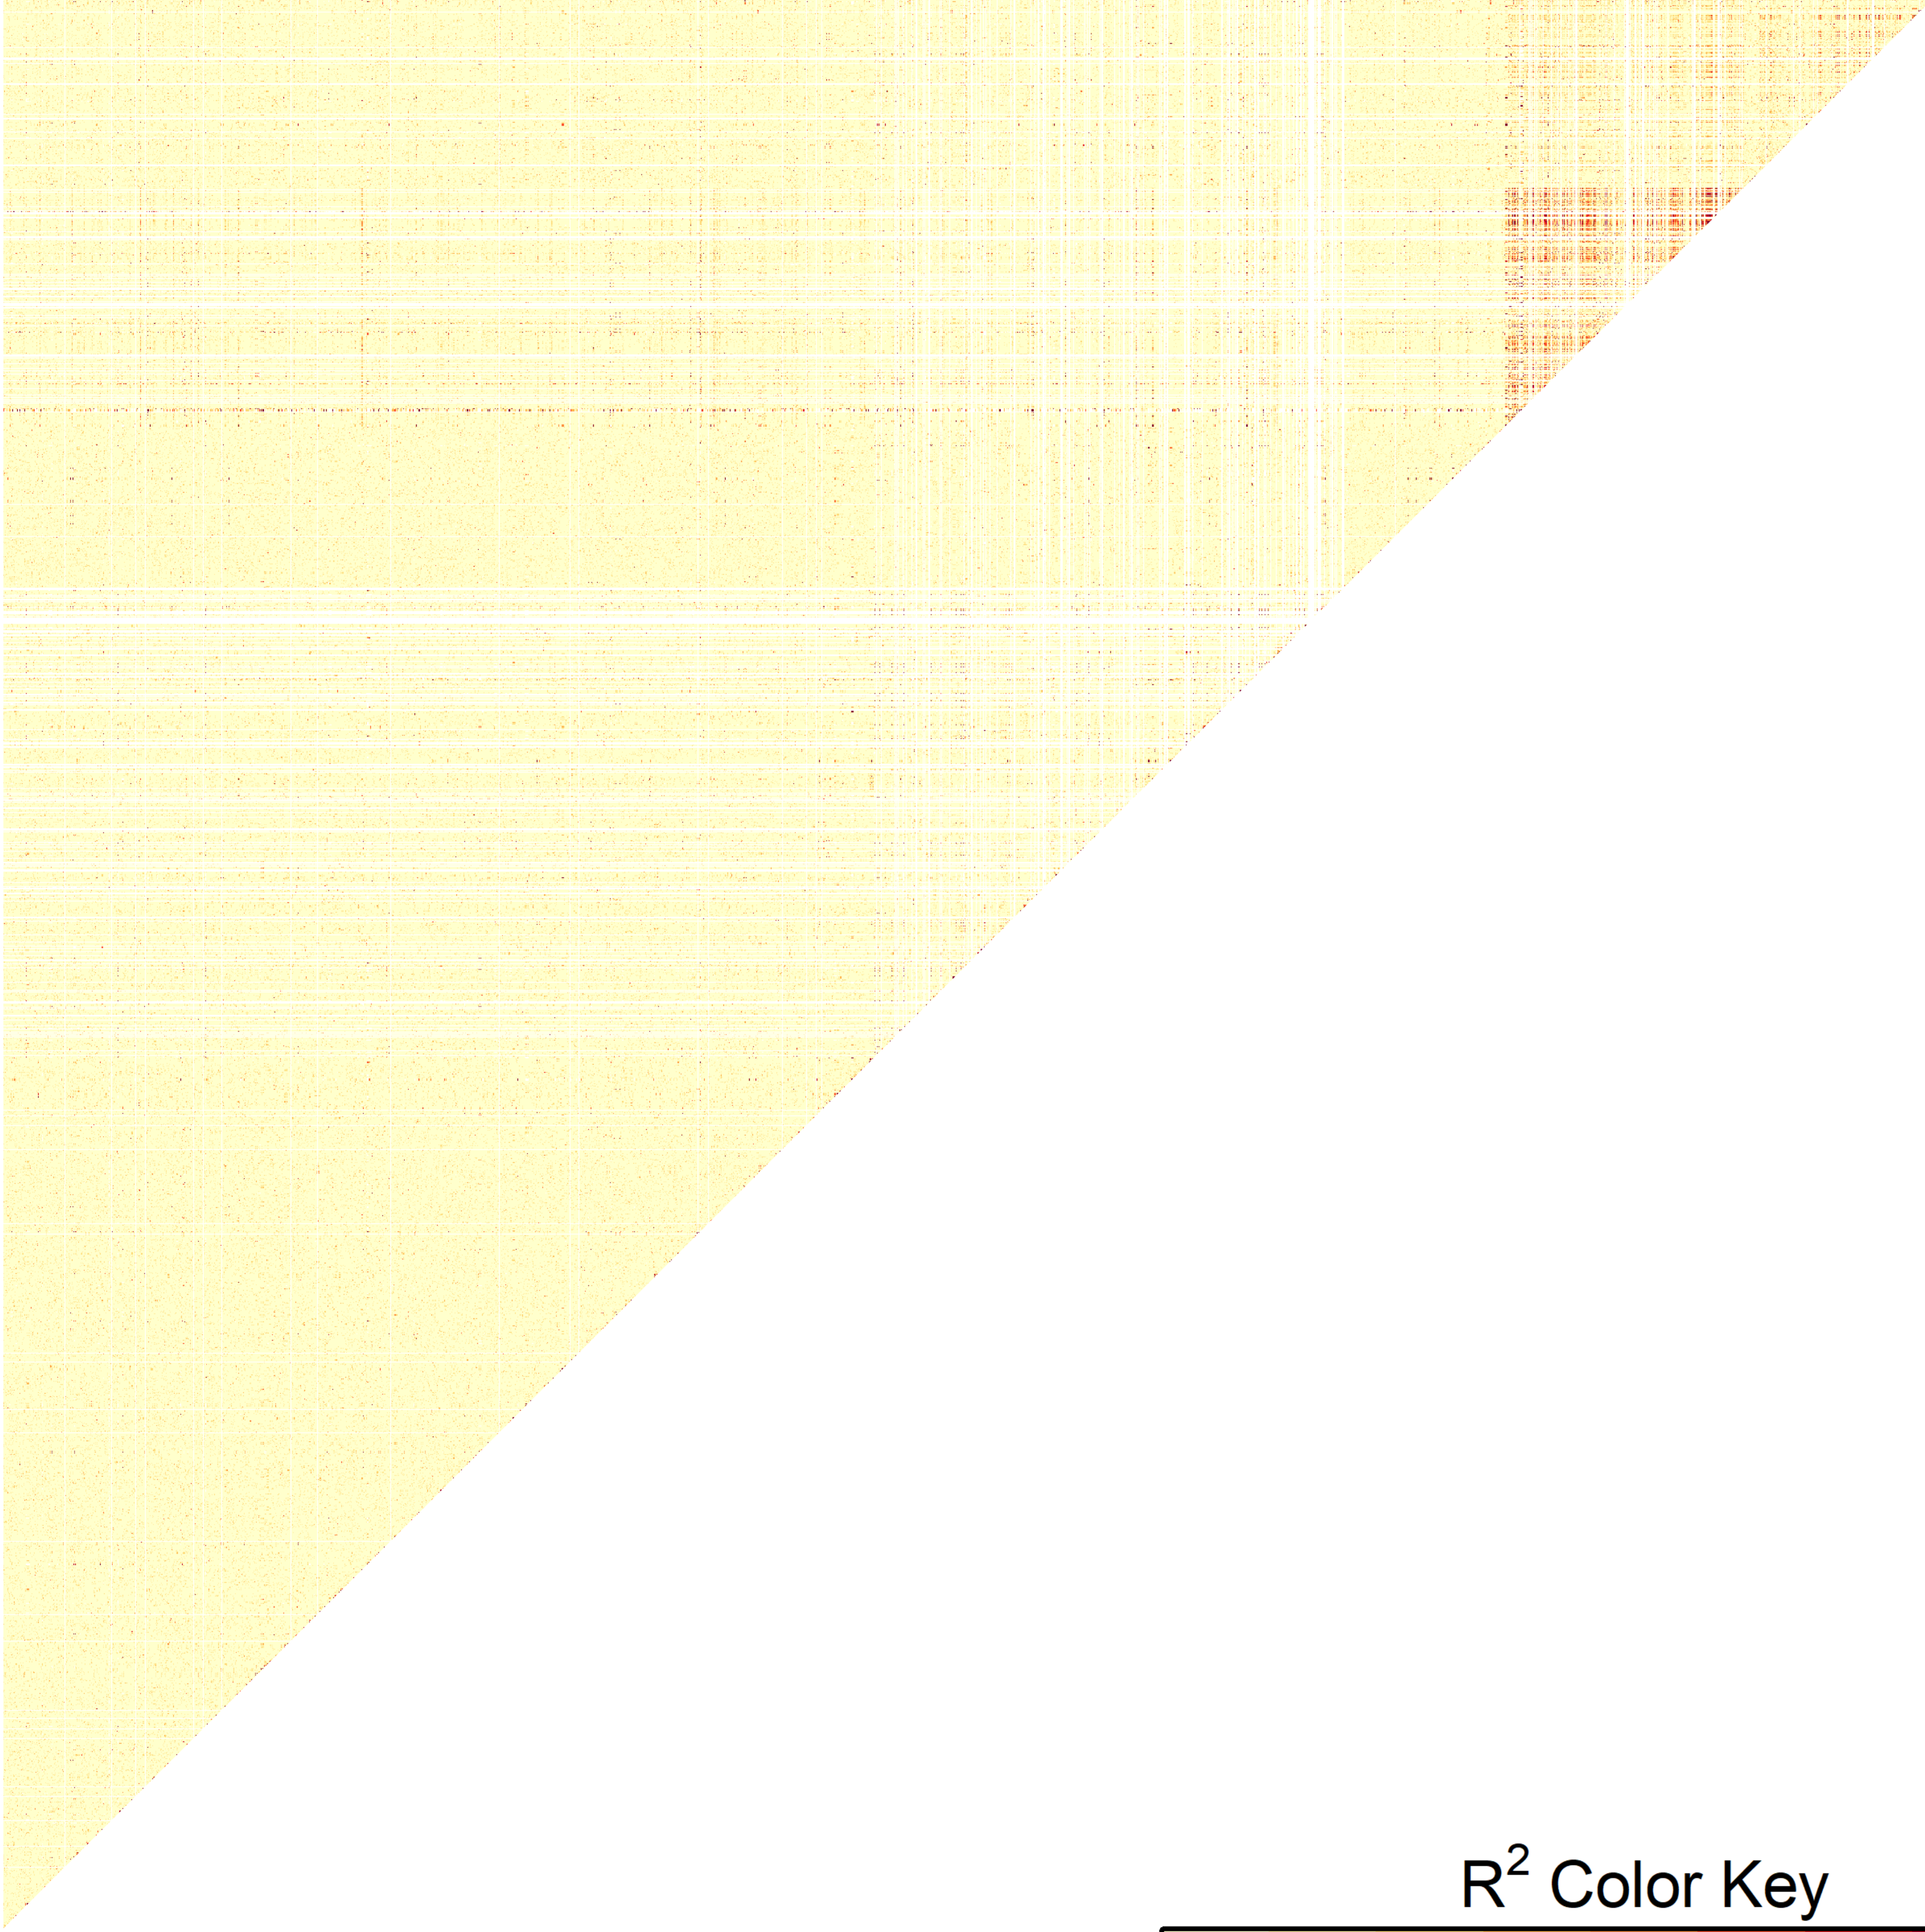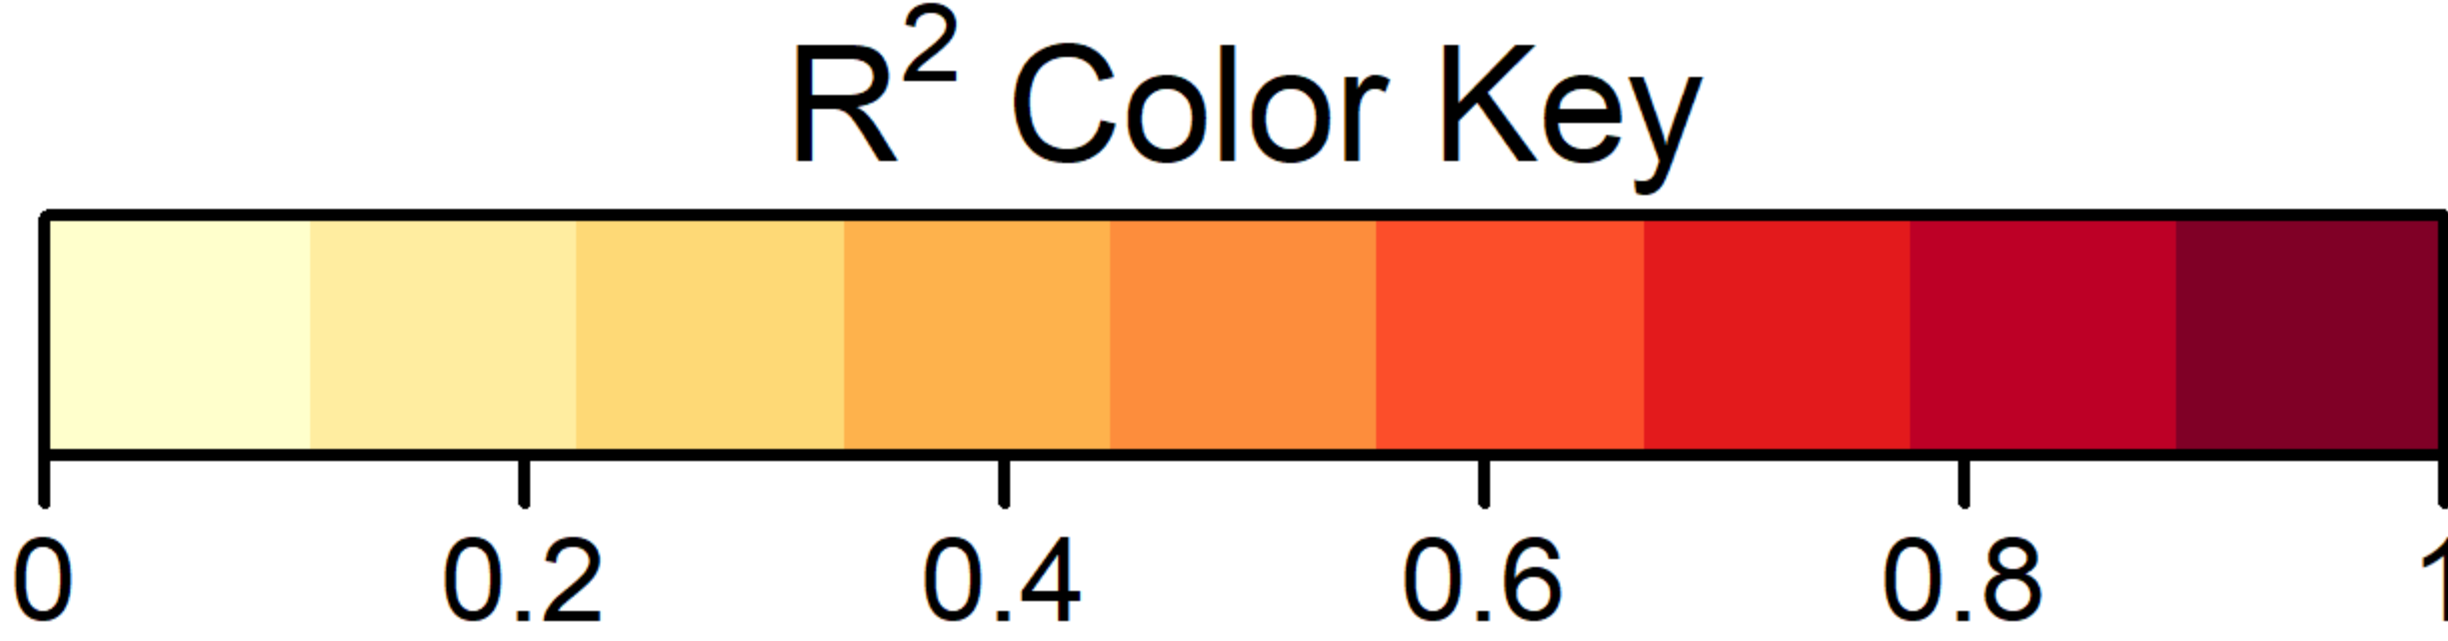



P. maximus - Chromosome 8

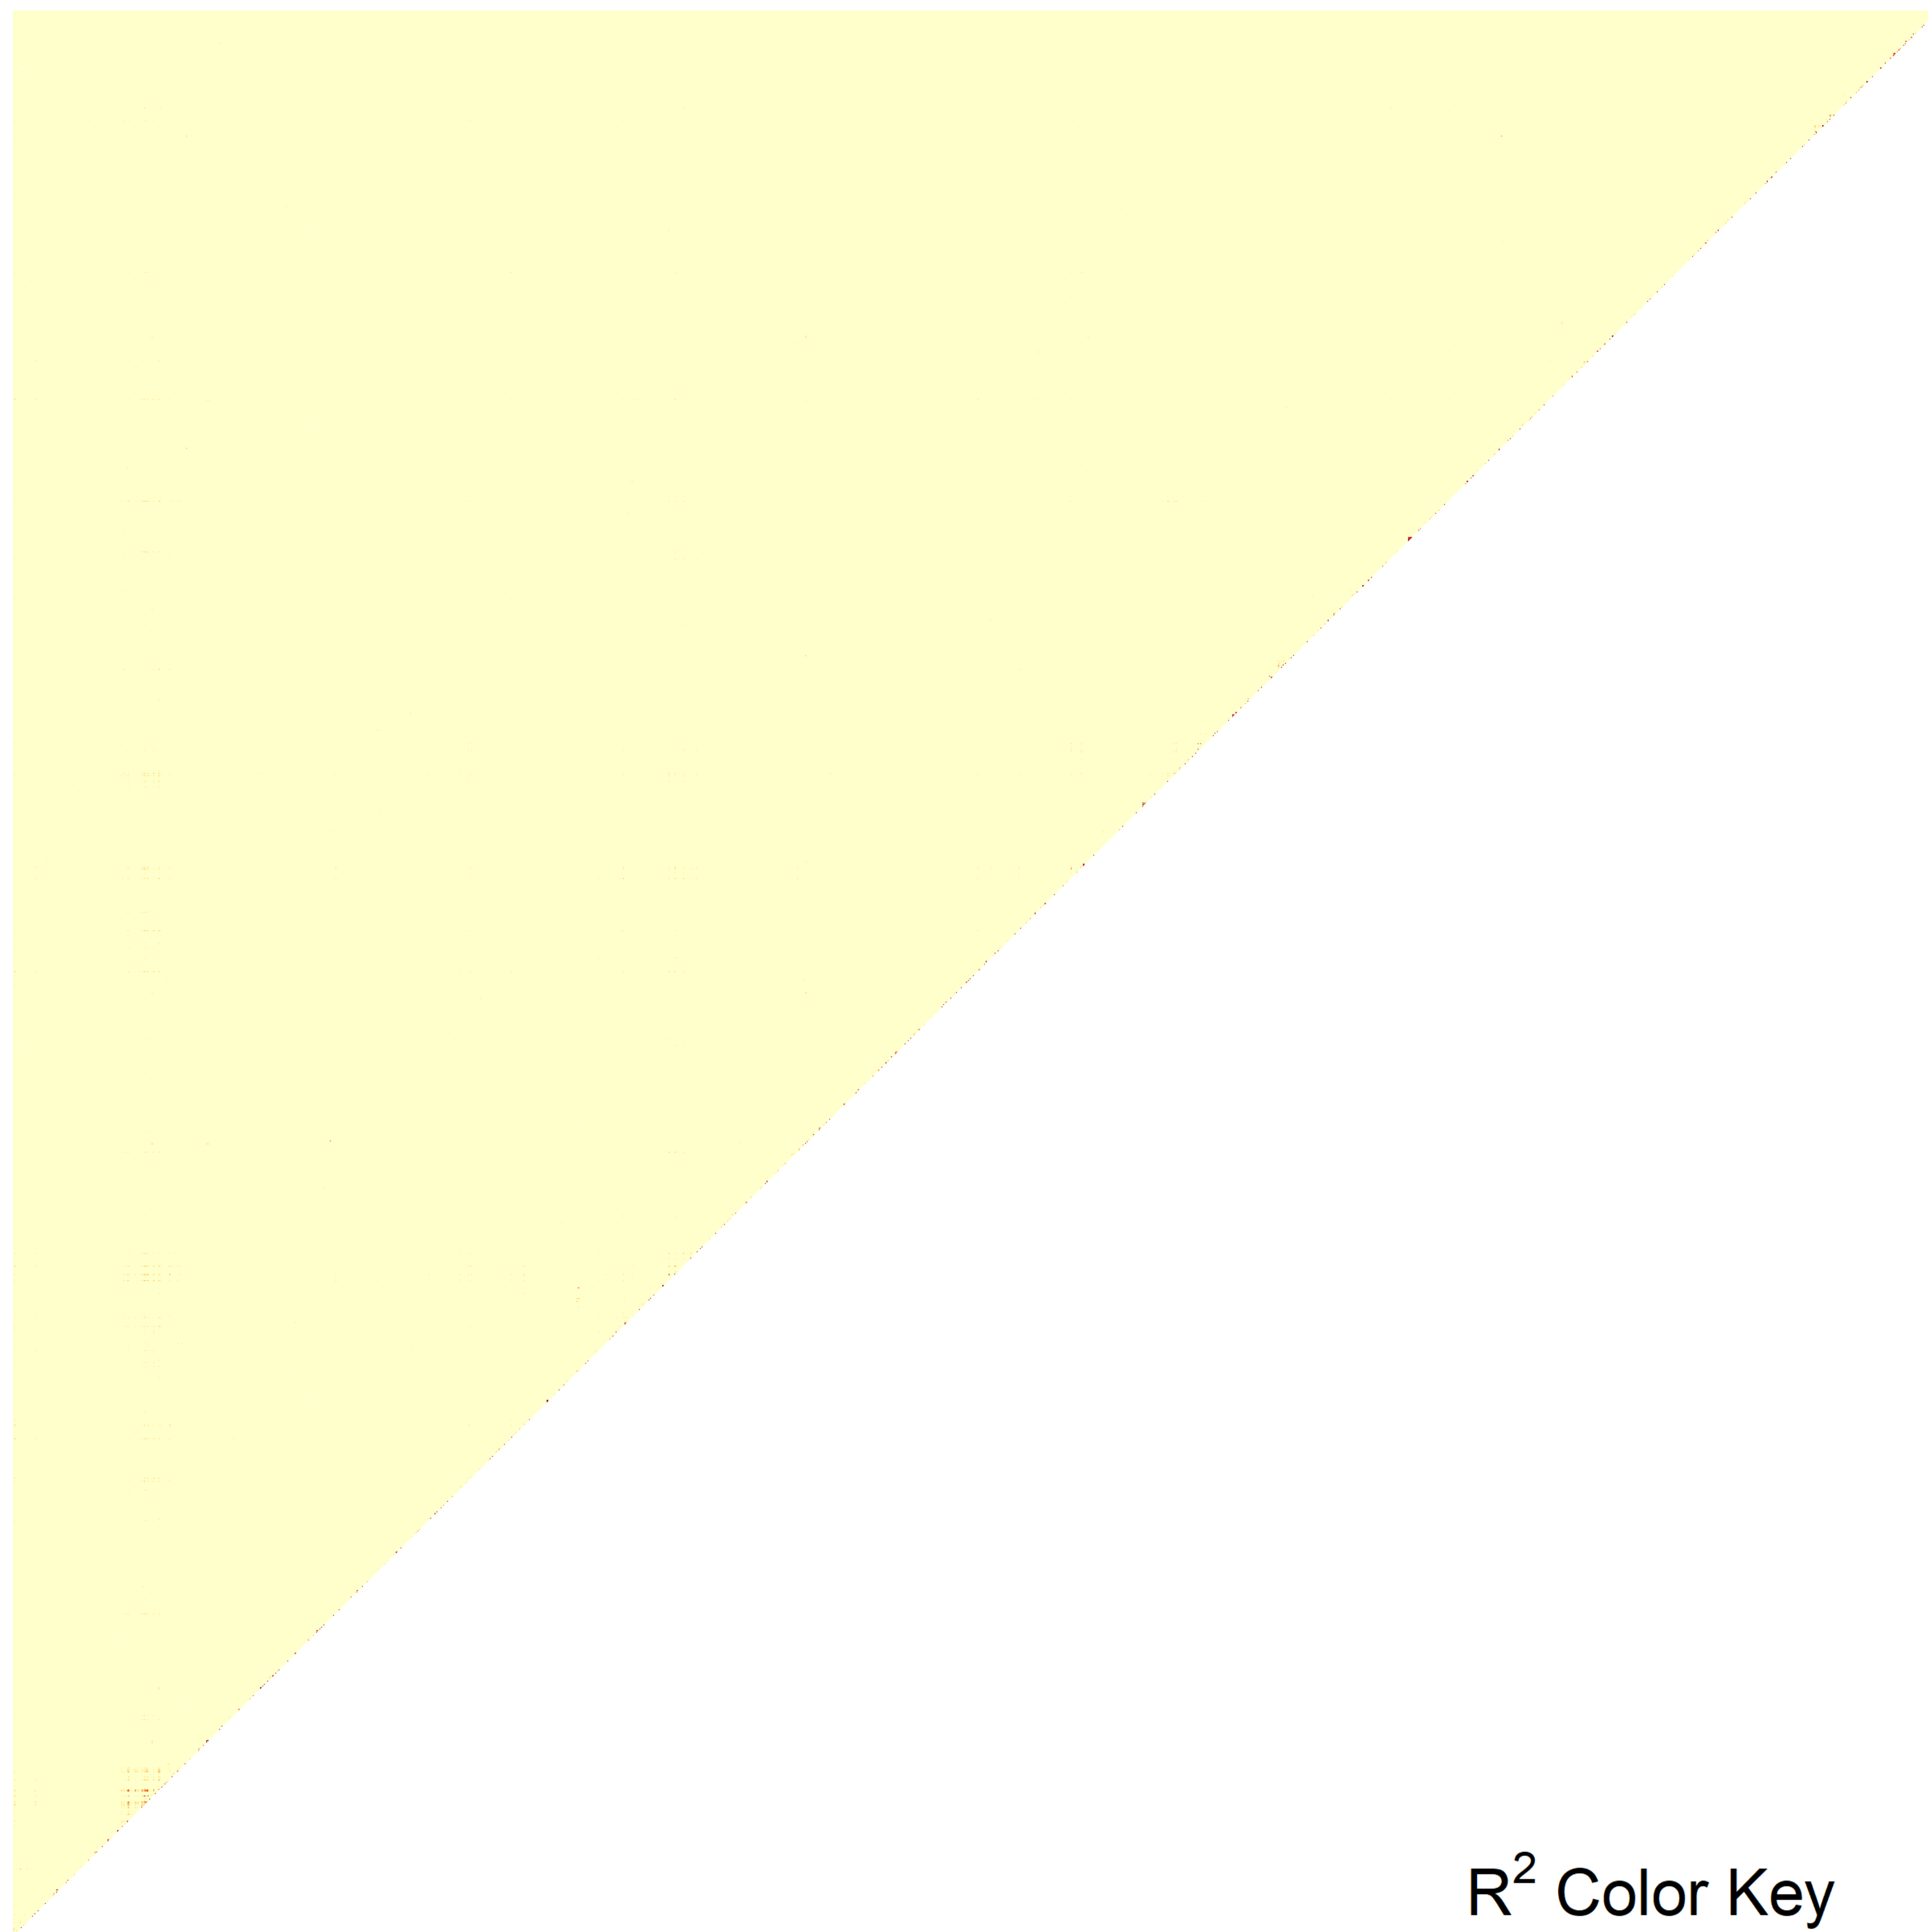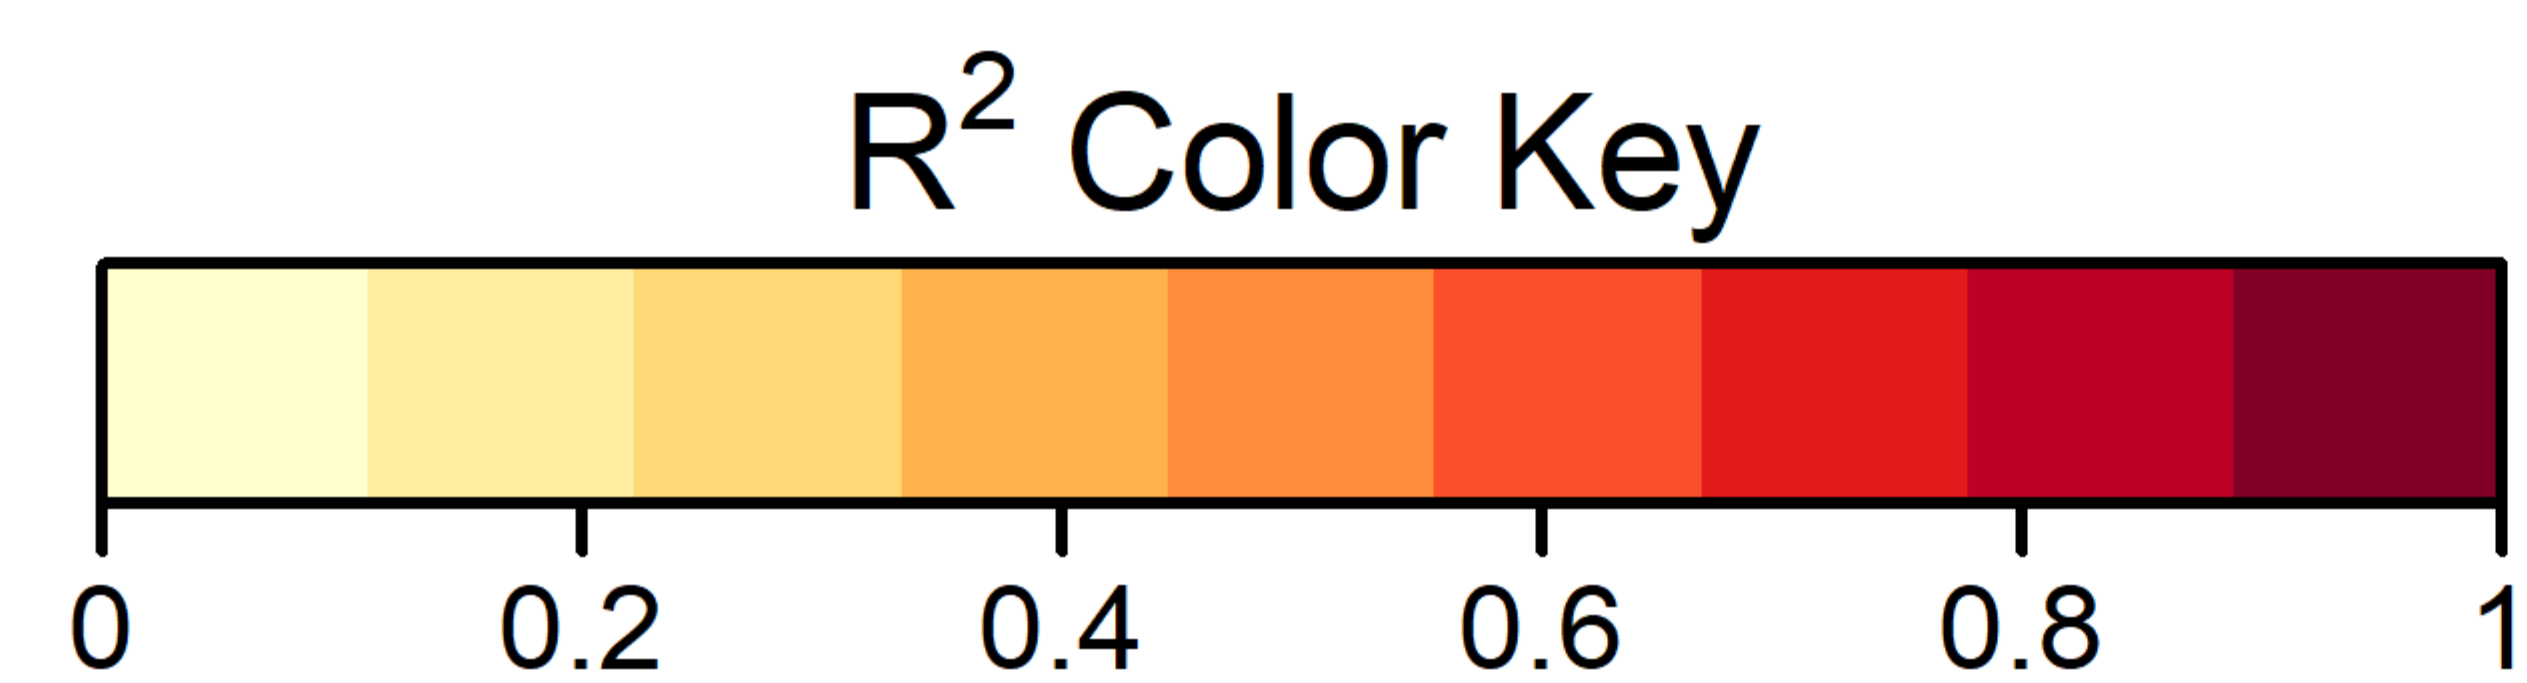

P. jacobaeus - Chromosome 8

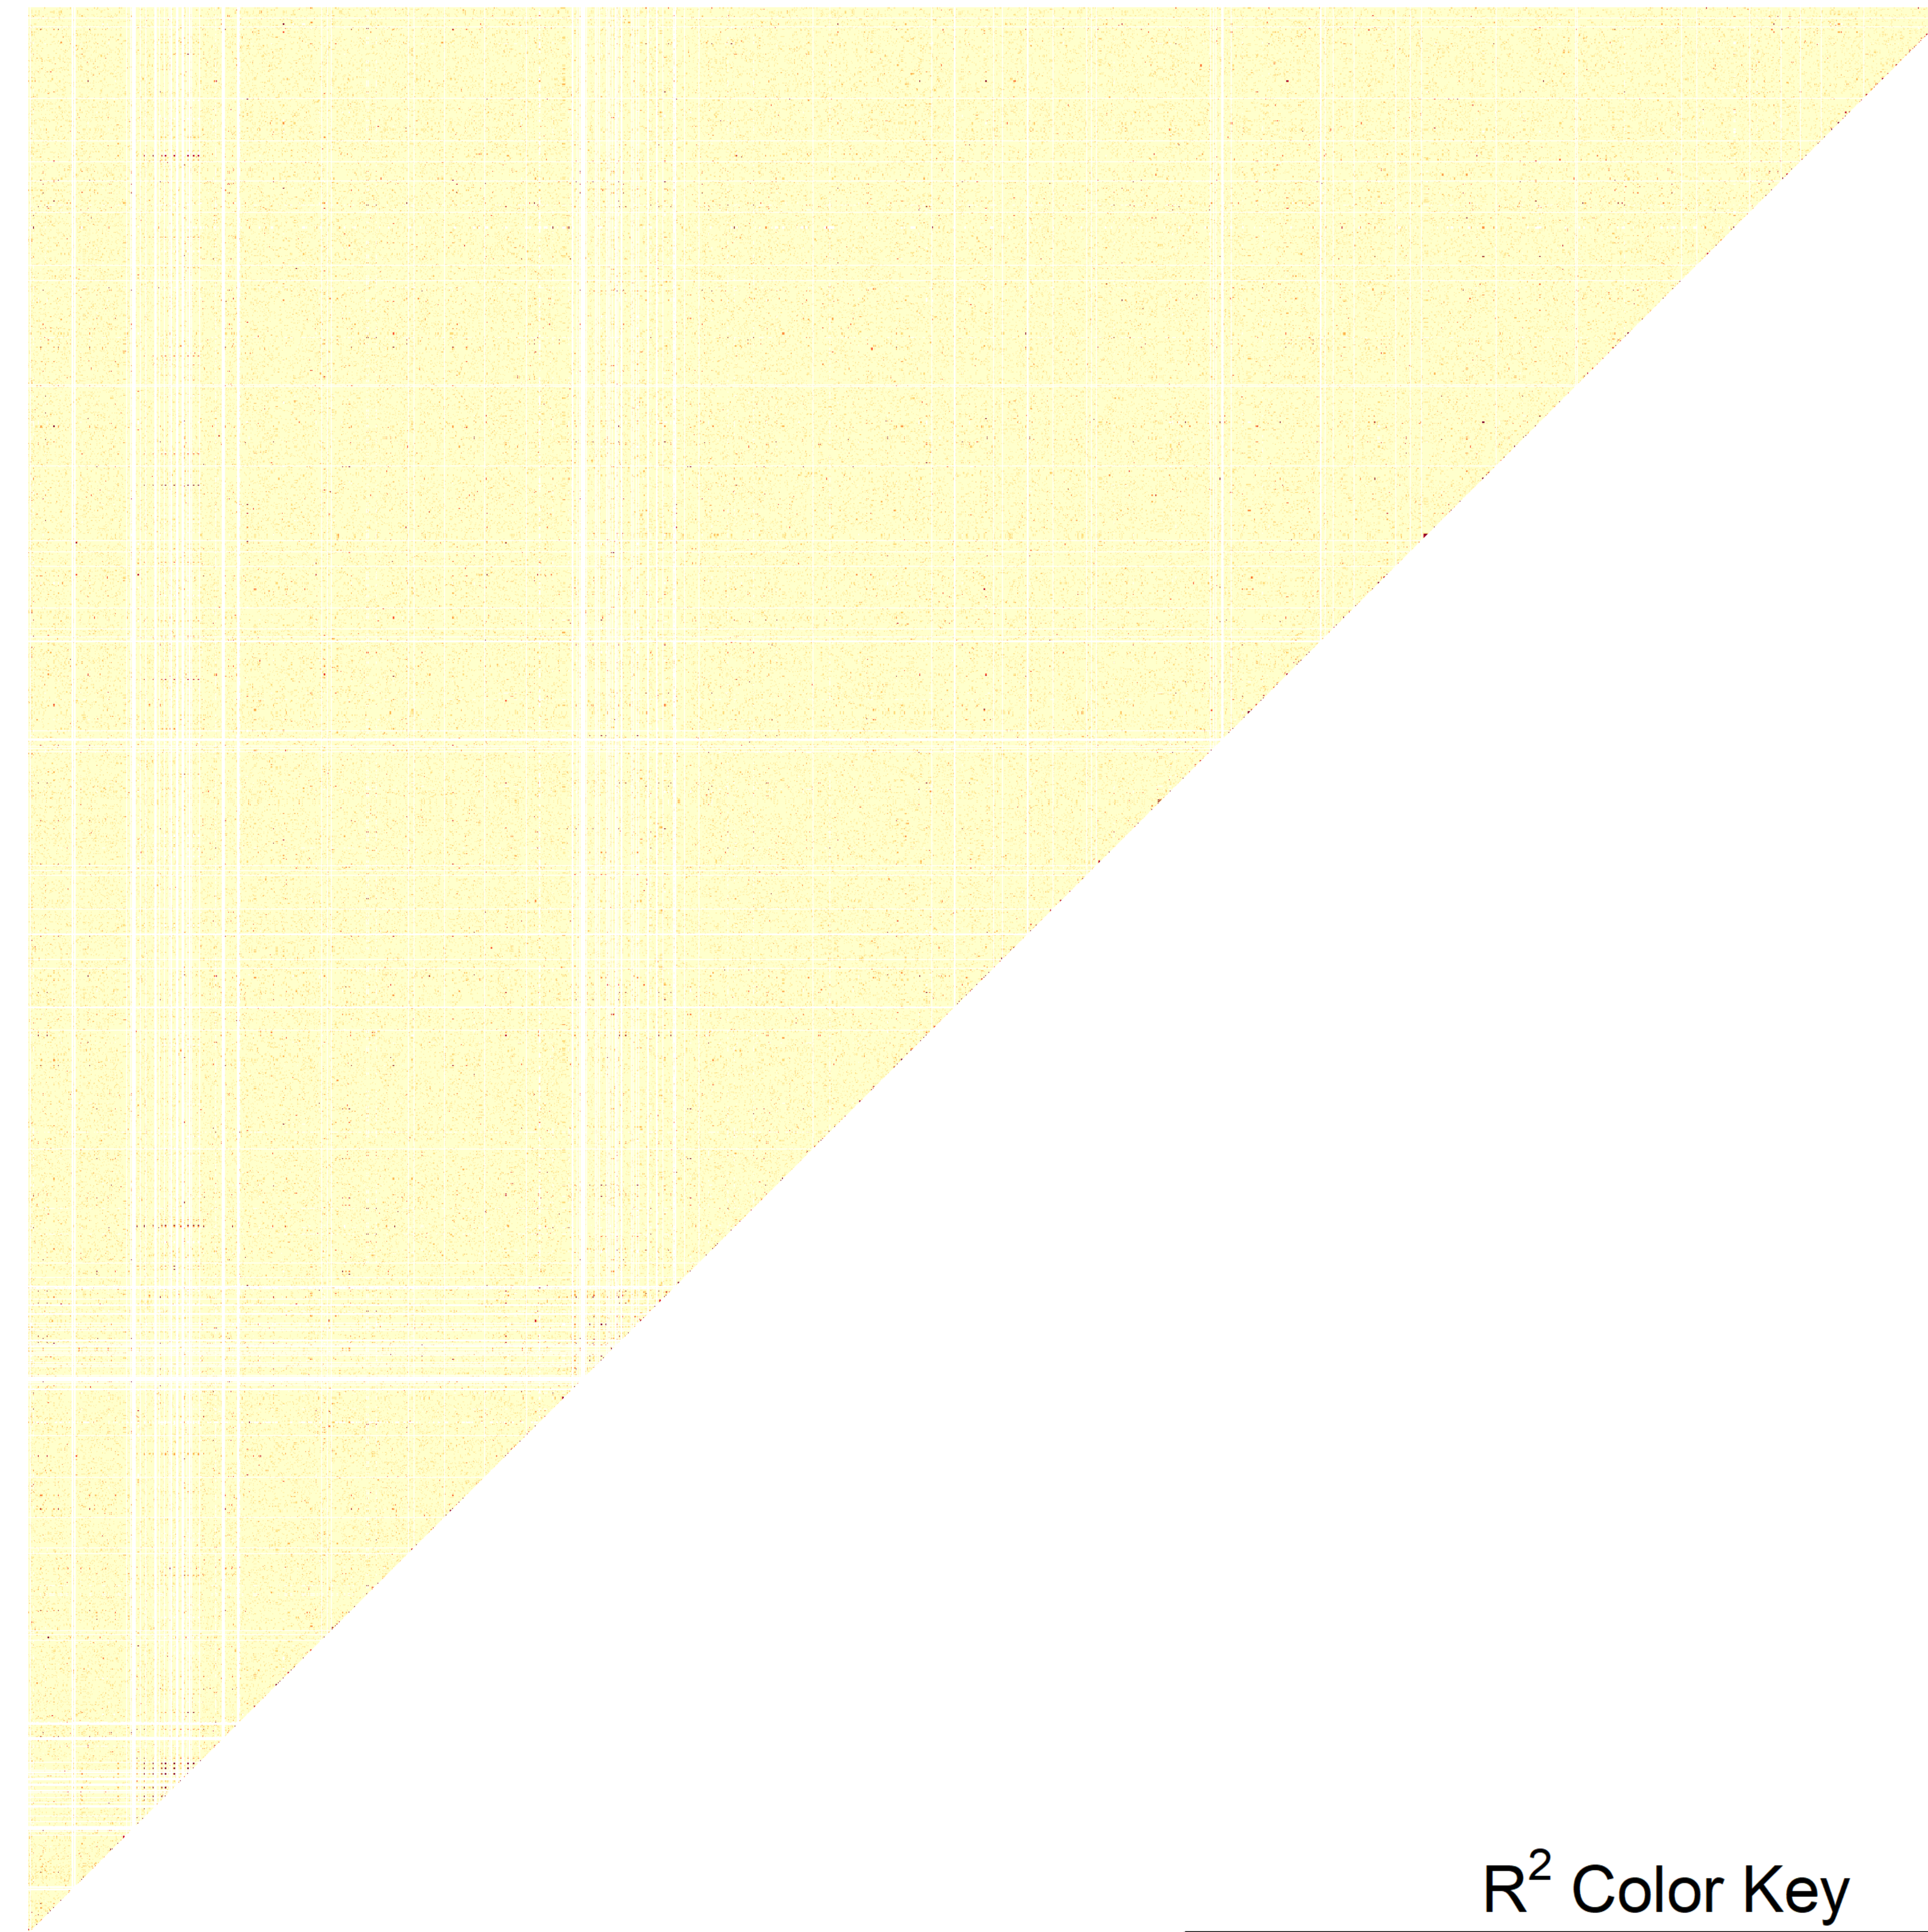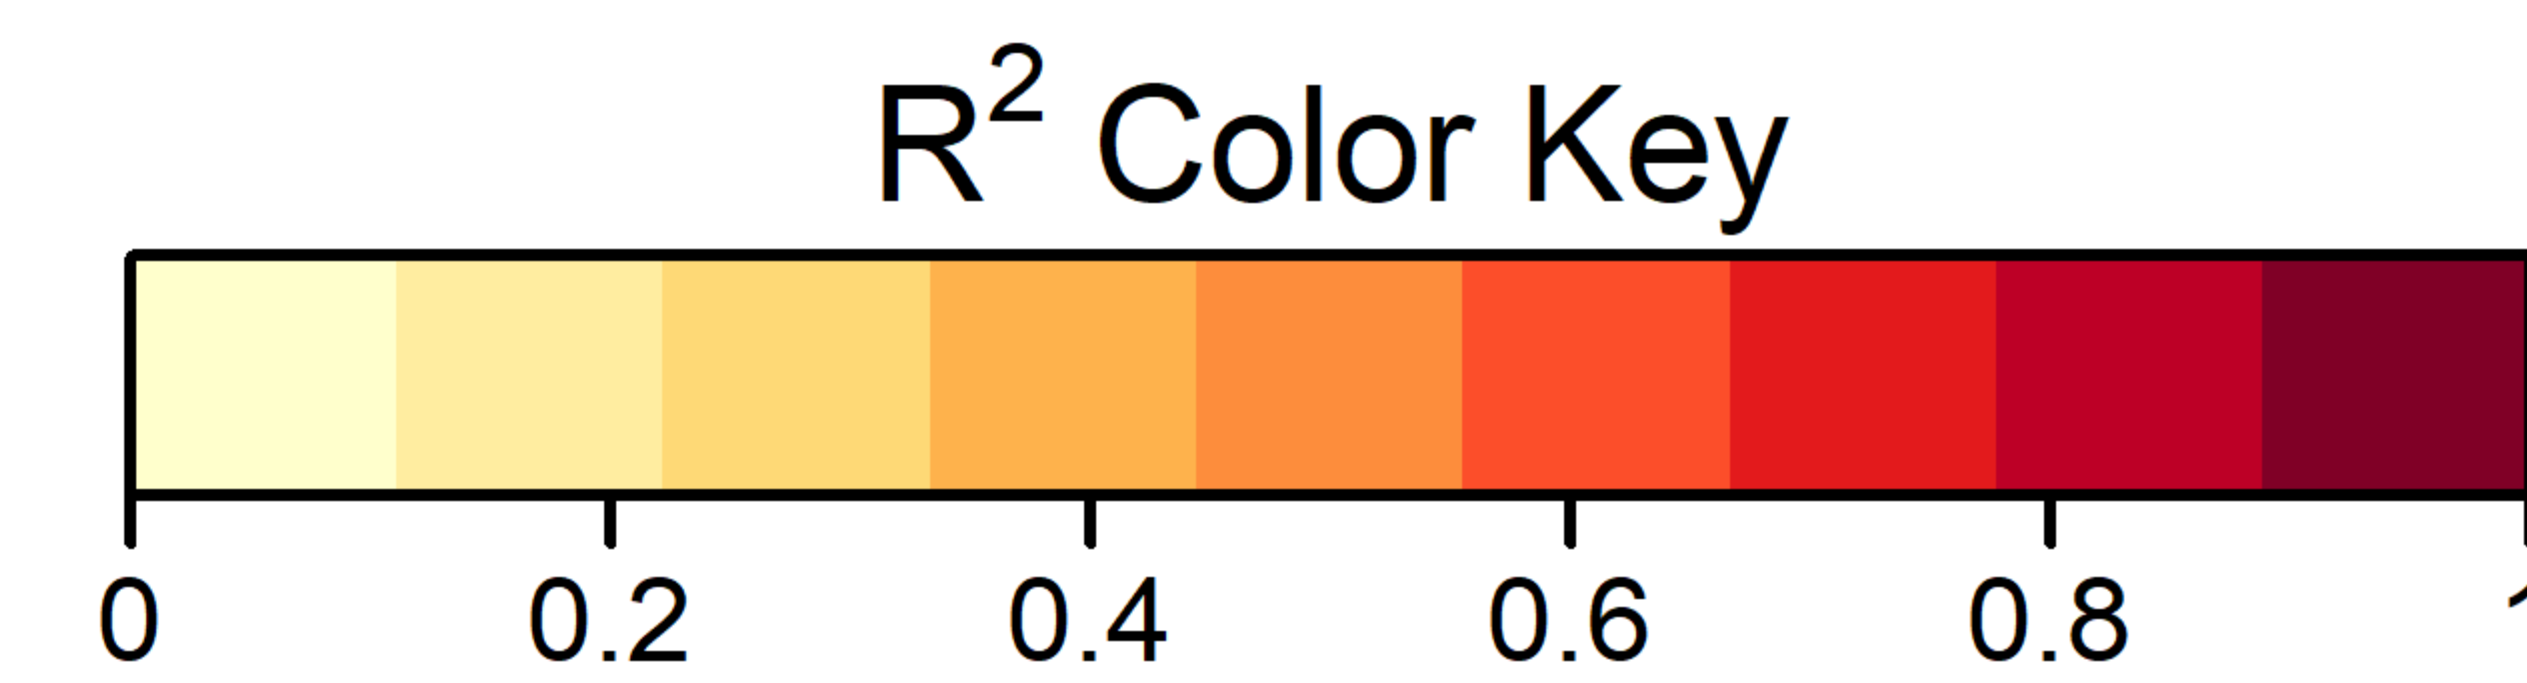



P. maximus - Chromosome 9

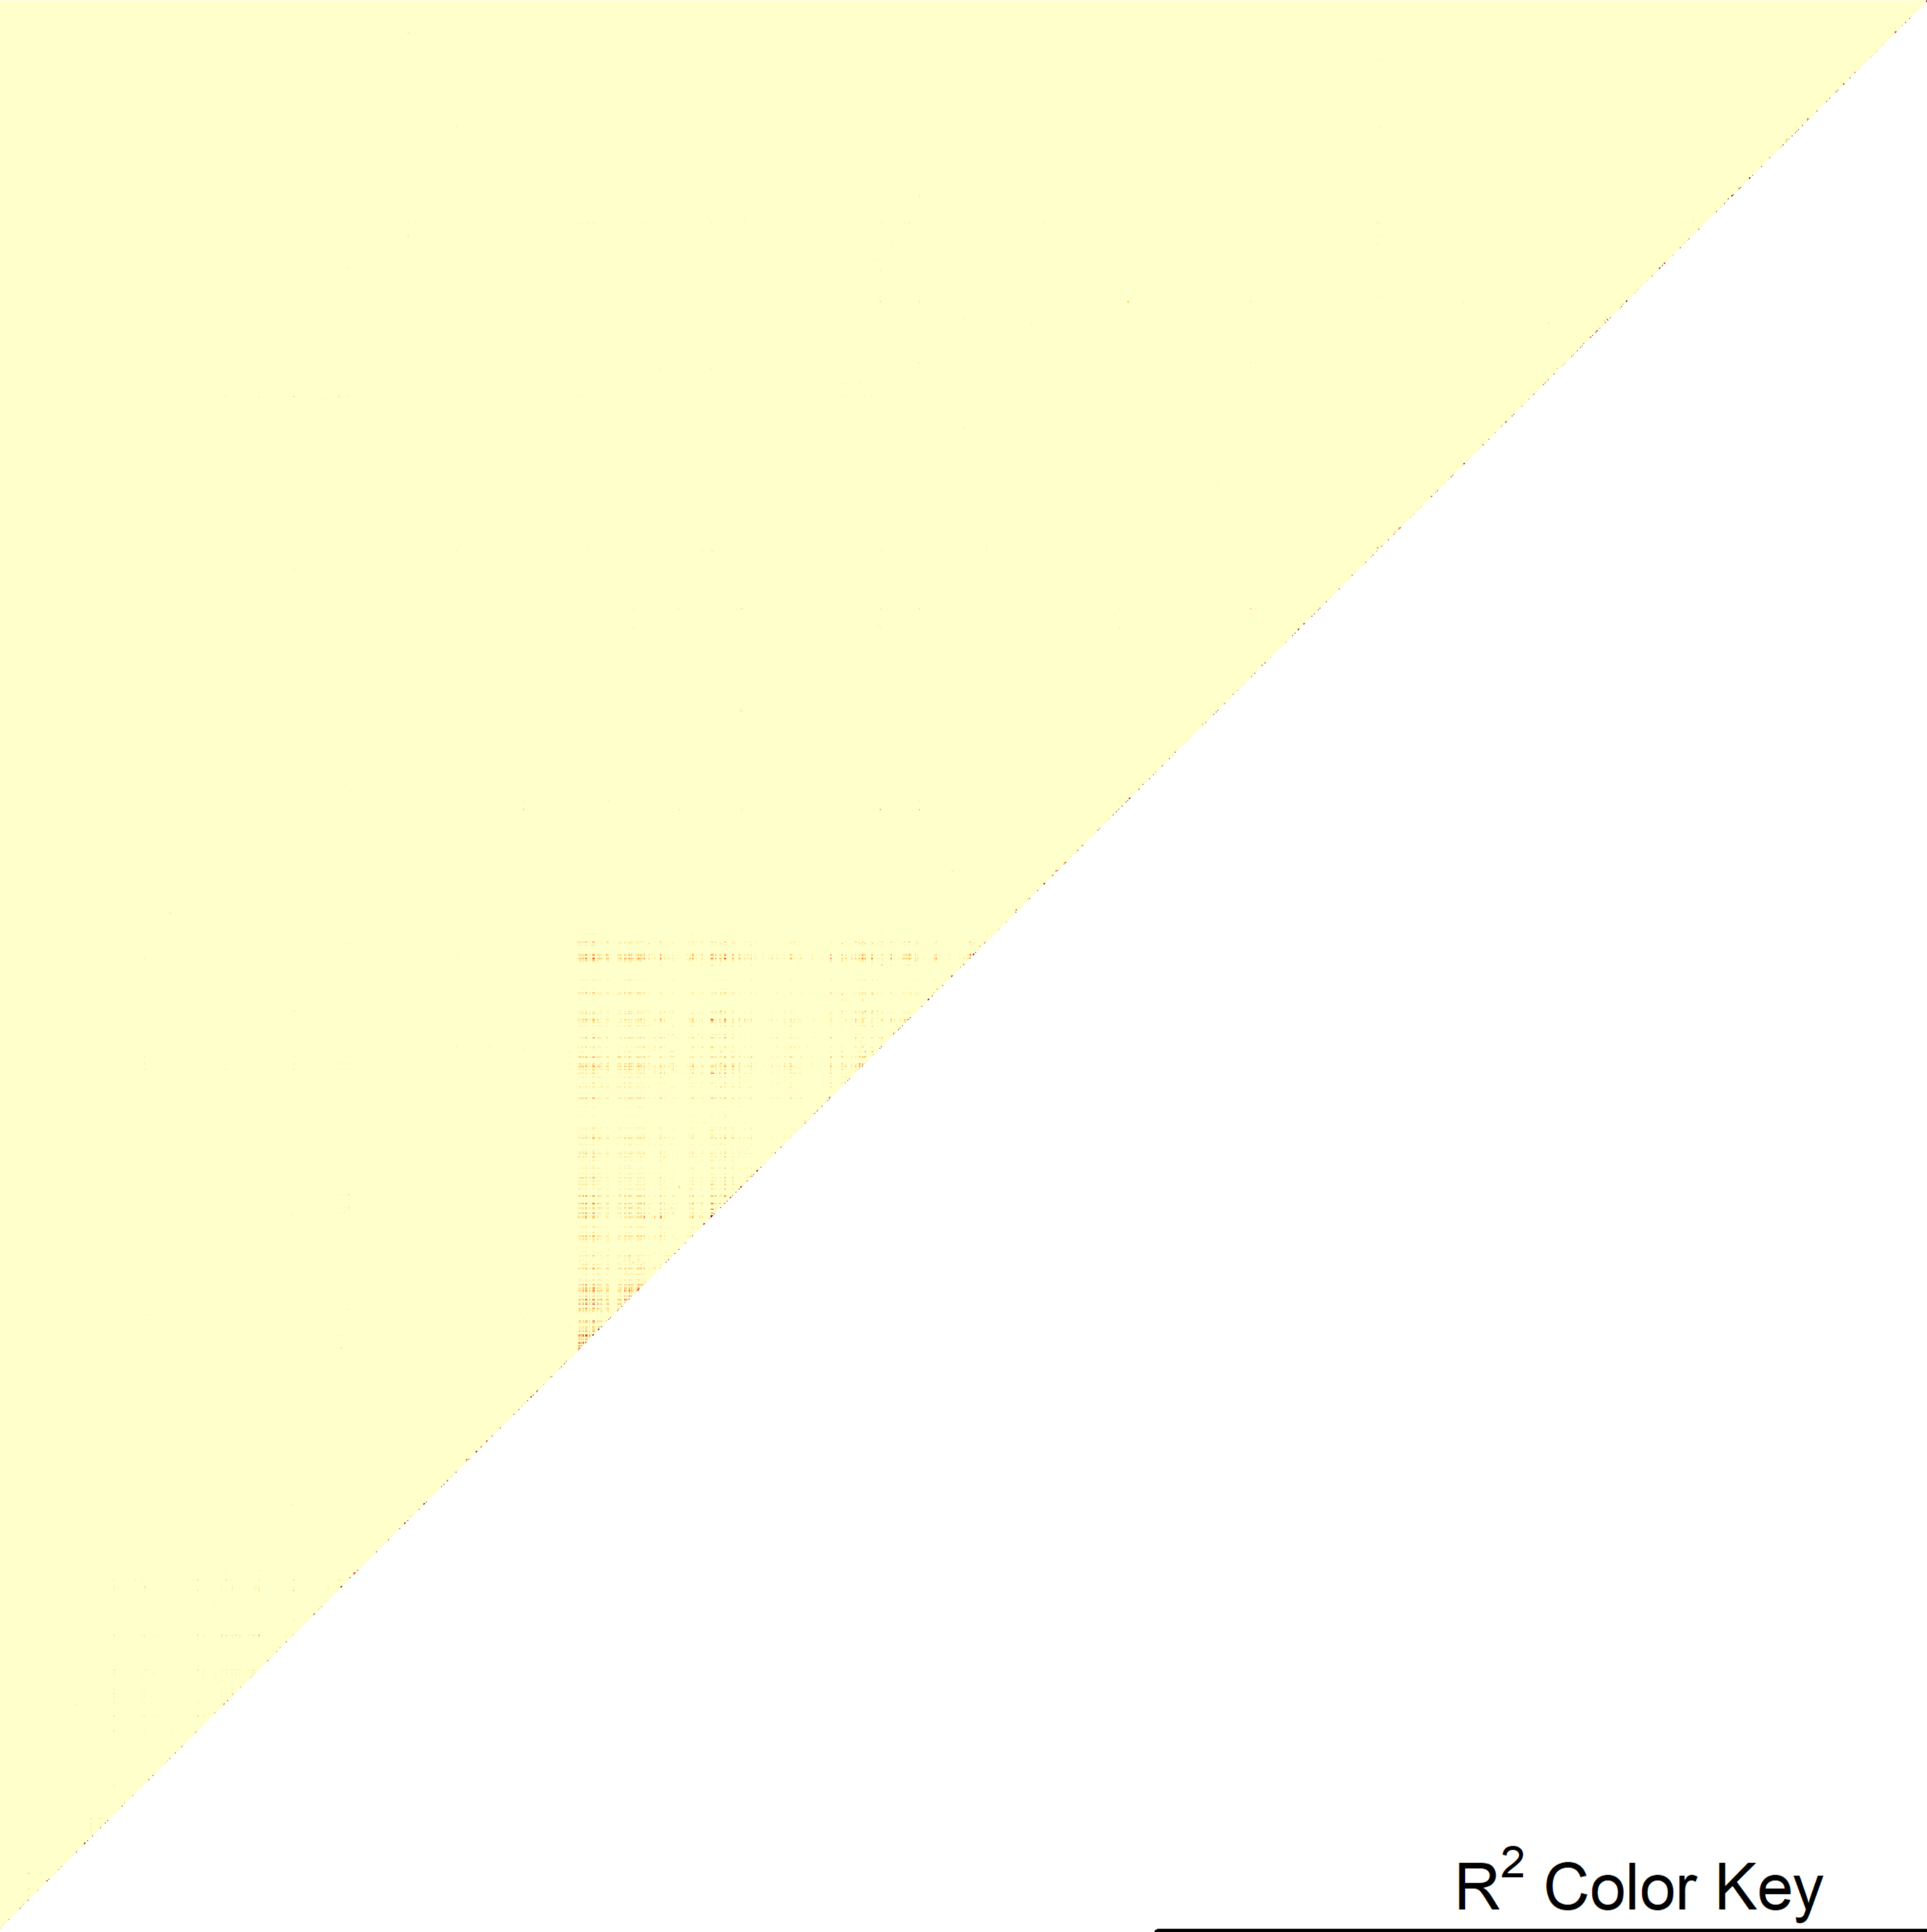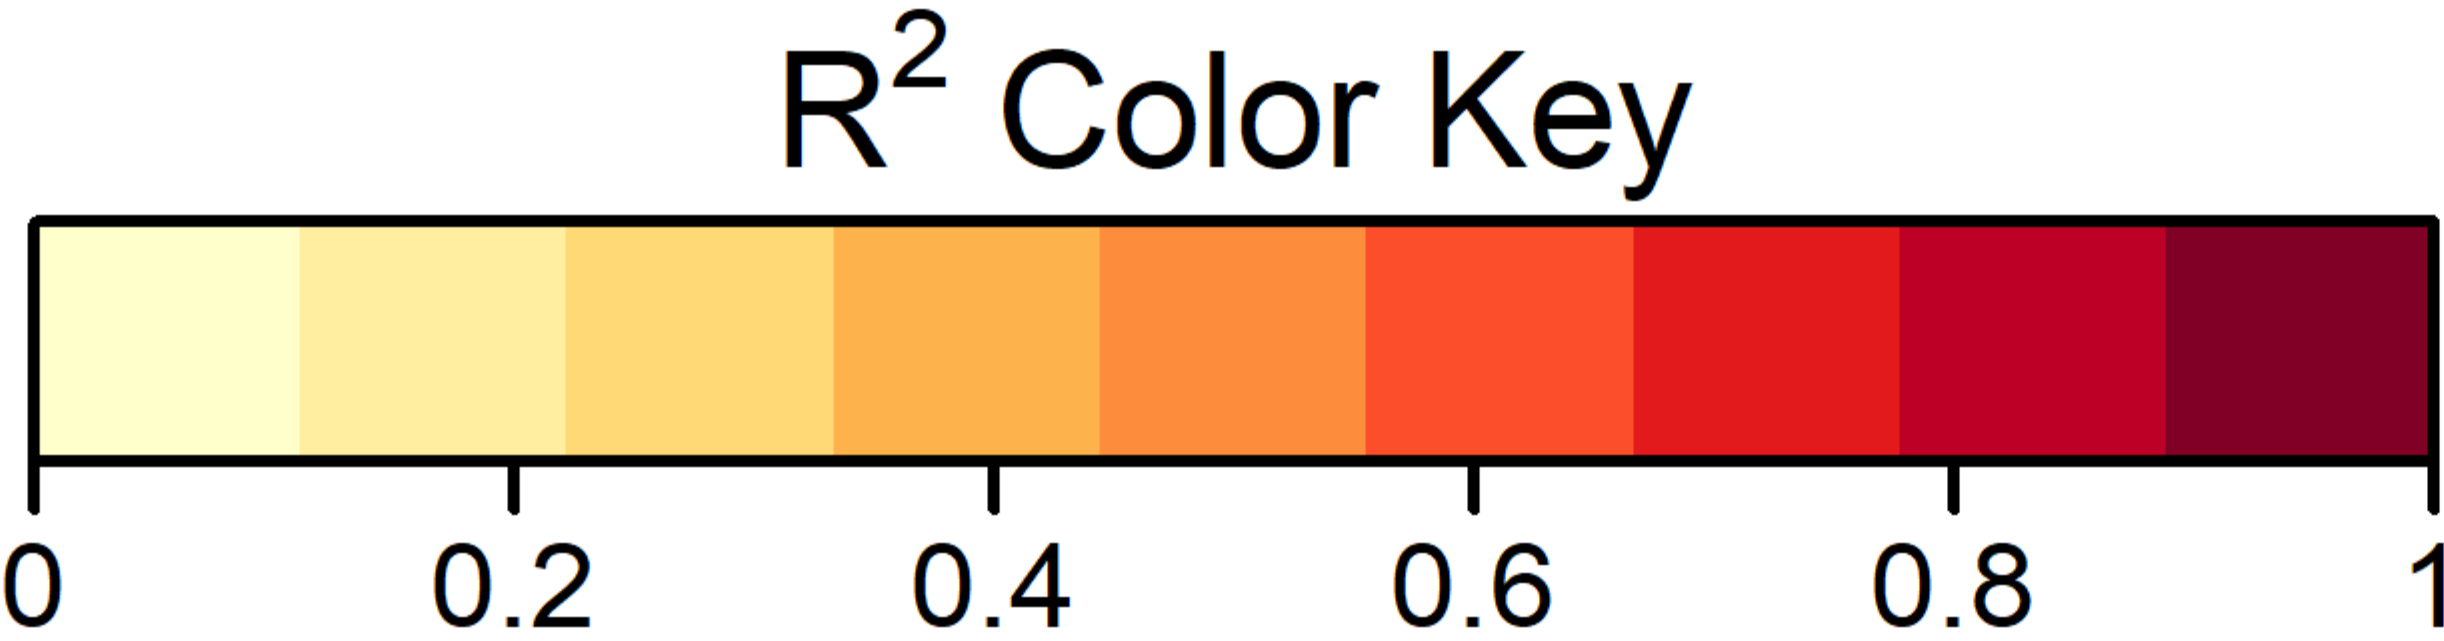

P. jacobaeus - Chromosome 9

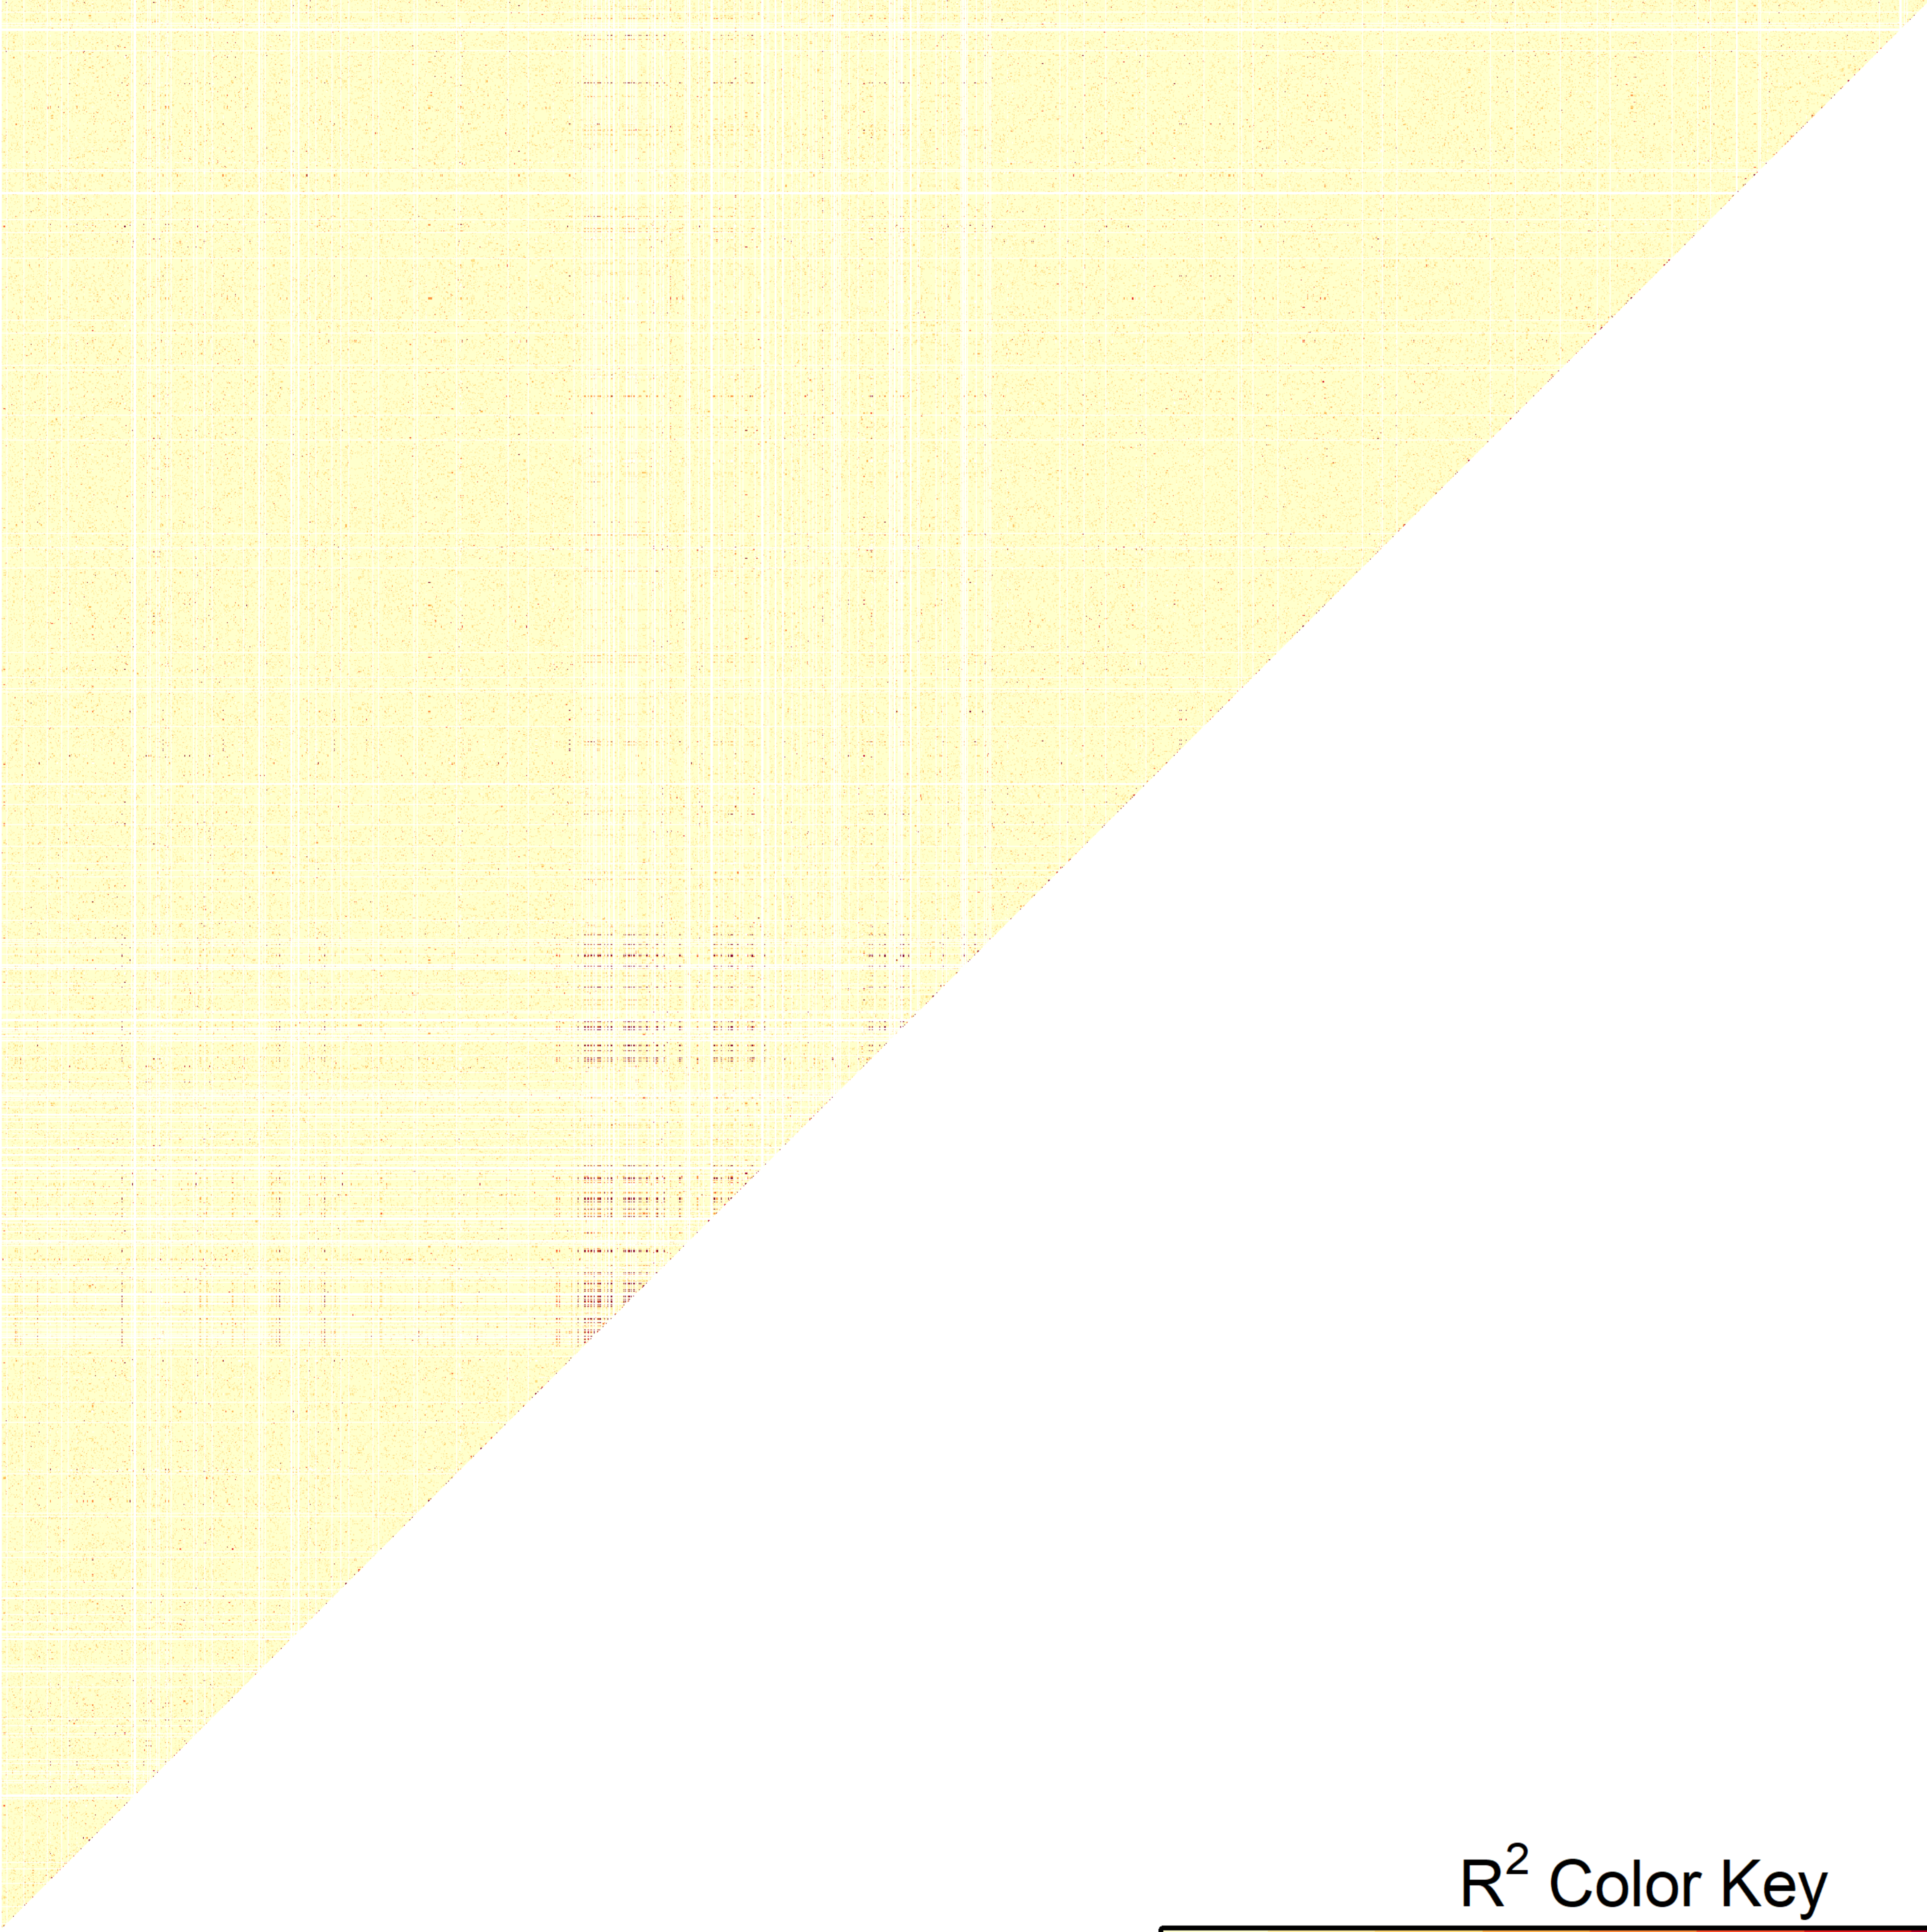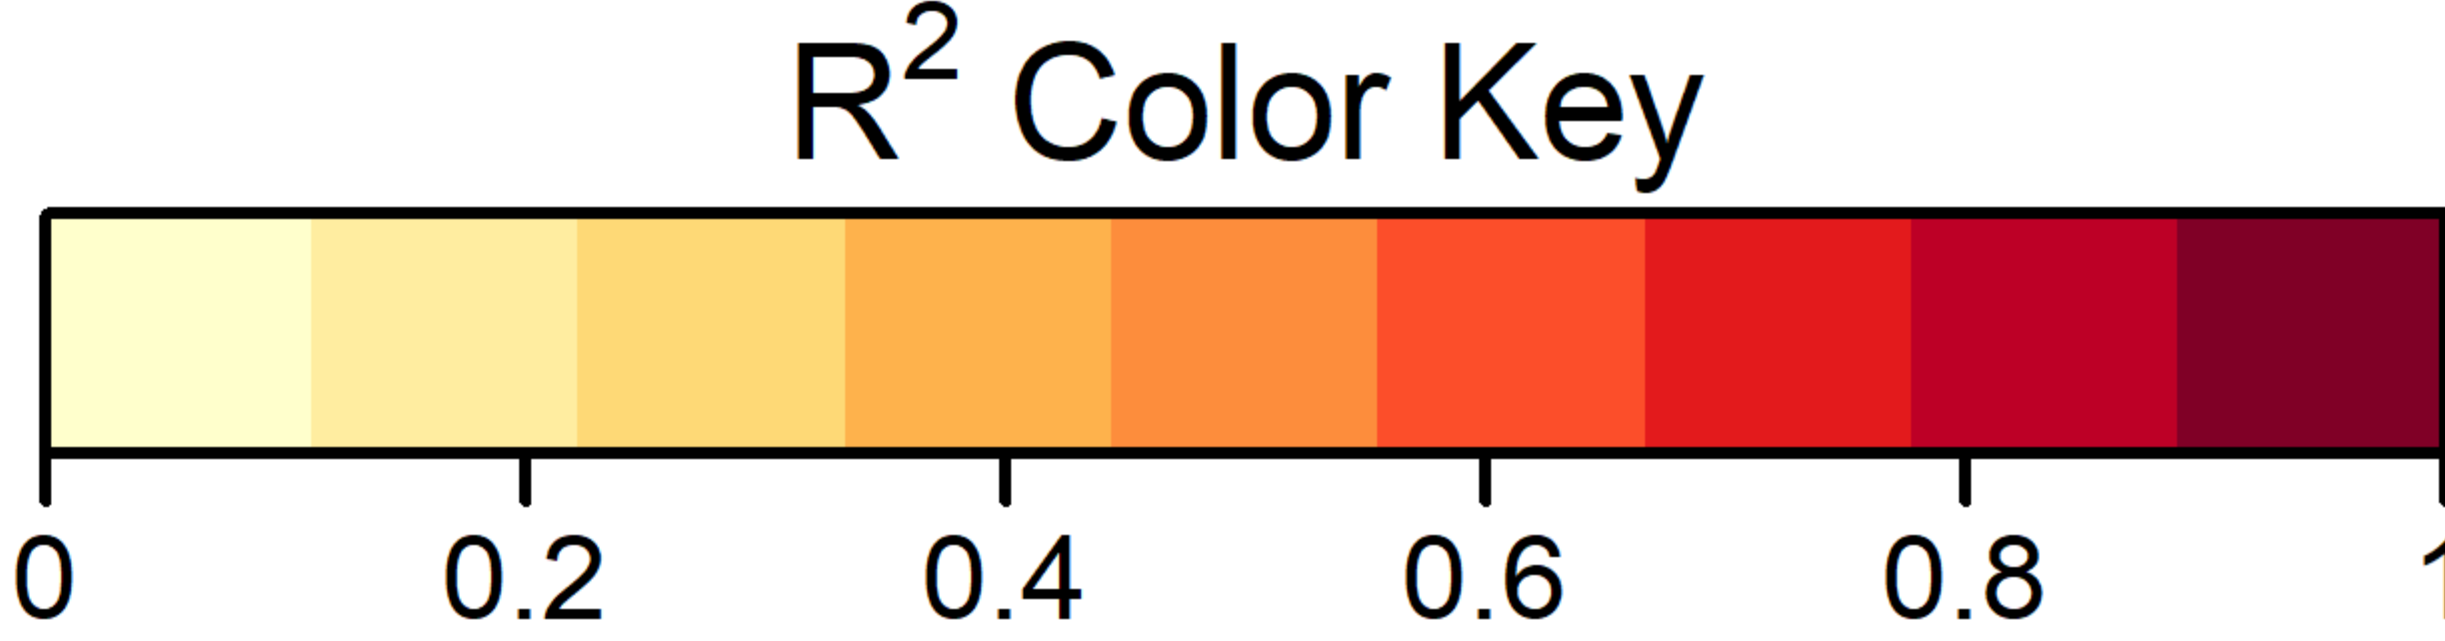



P. maximus - Chromosome 10

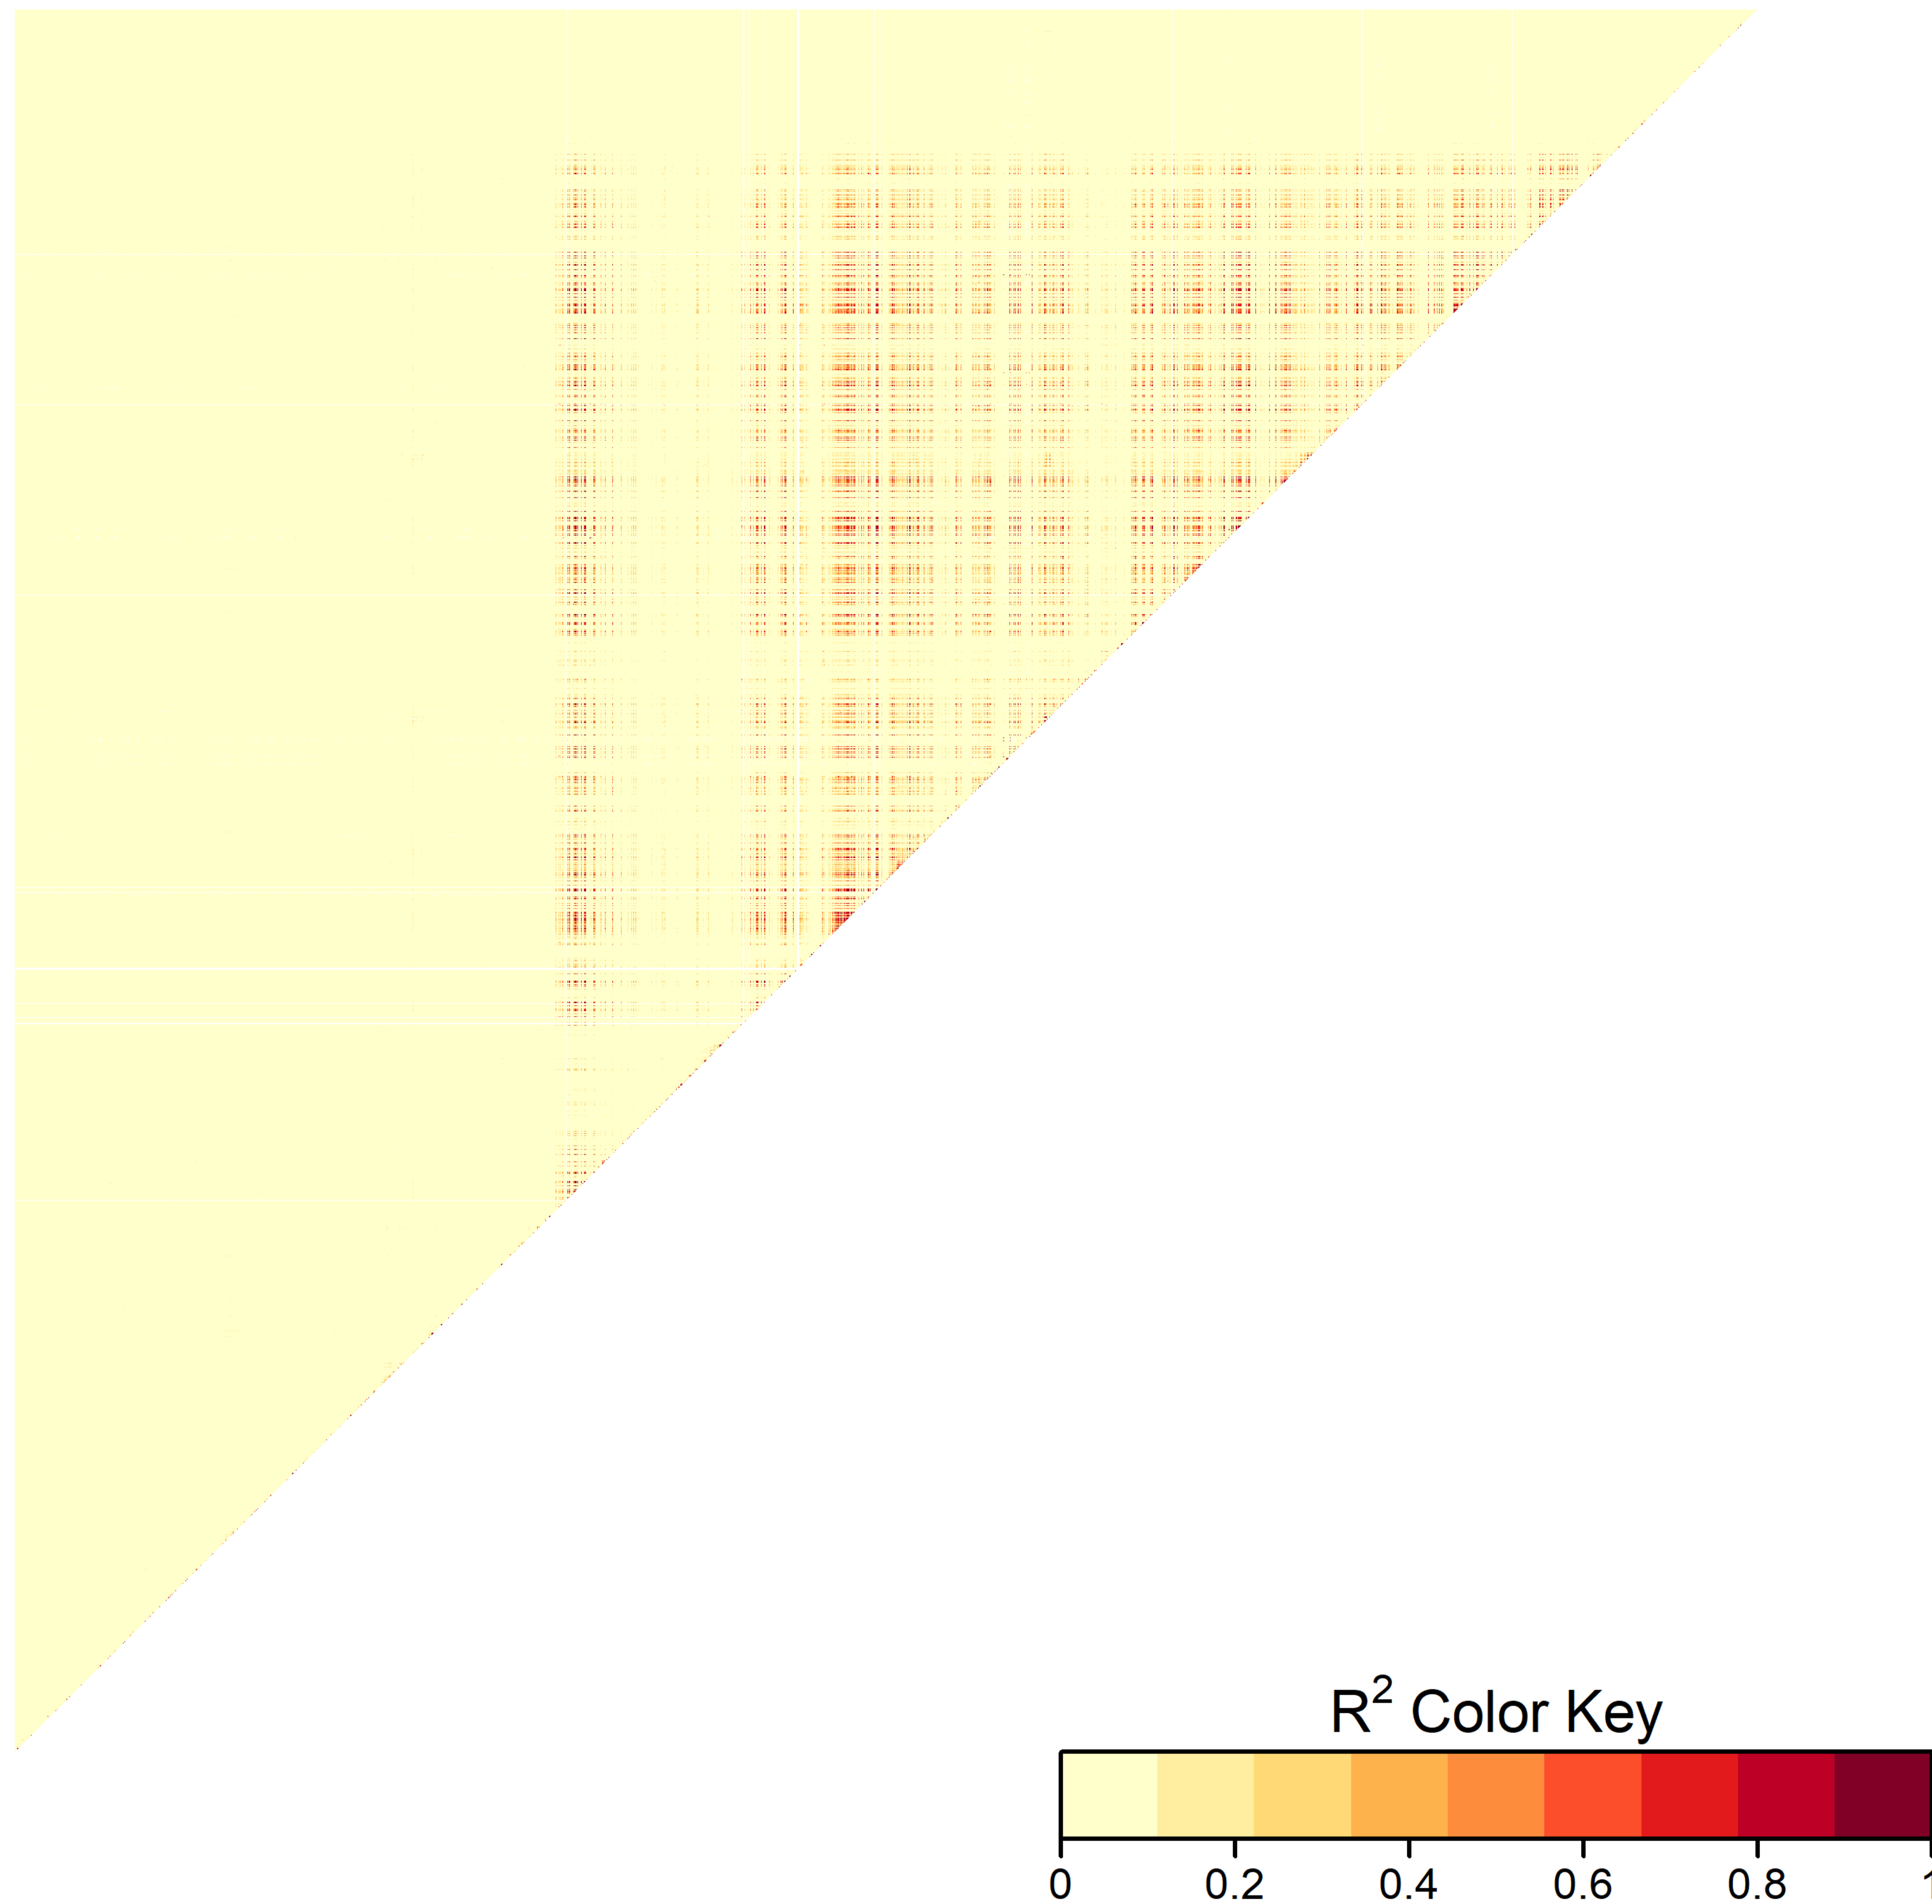

P. jacobaeus - Chromosome 10

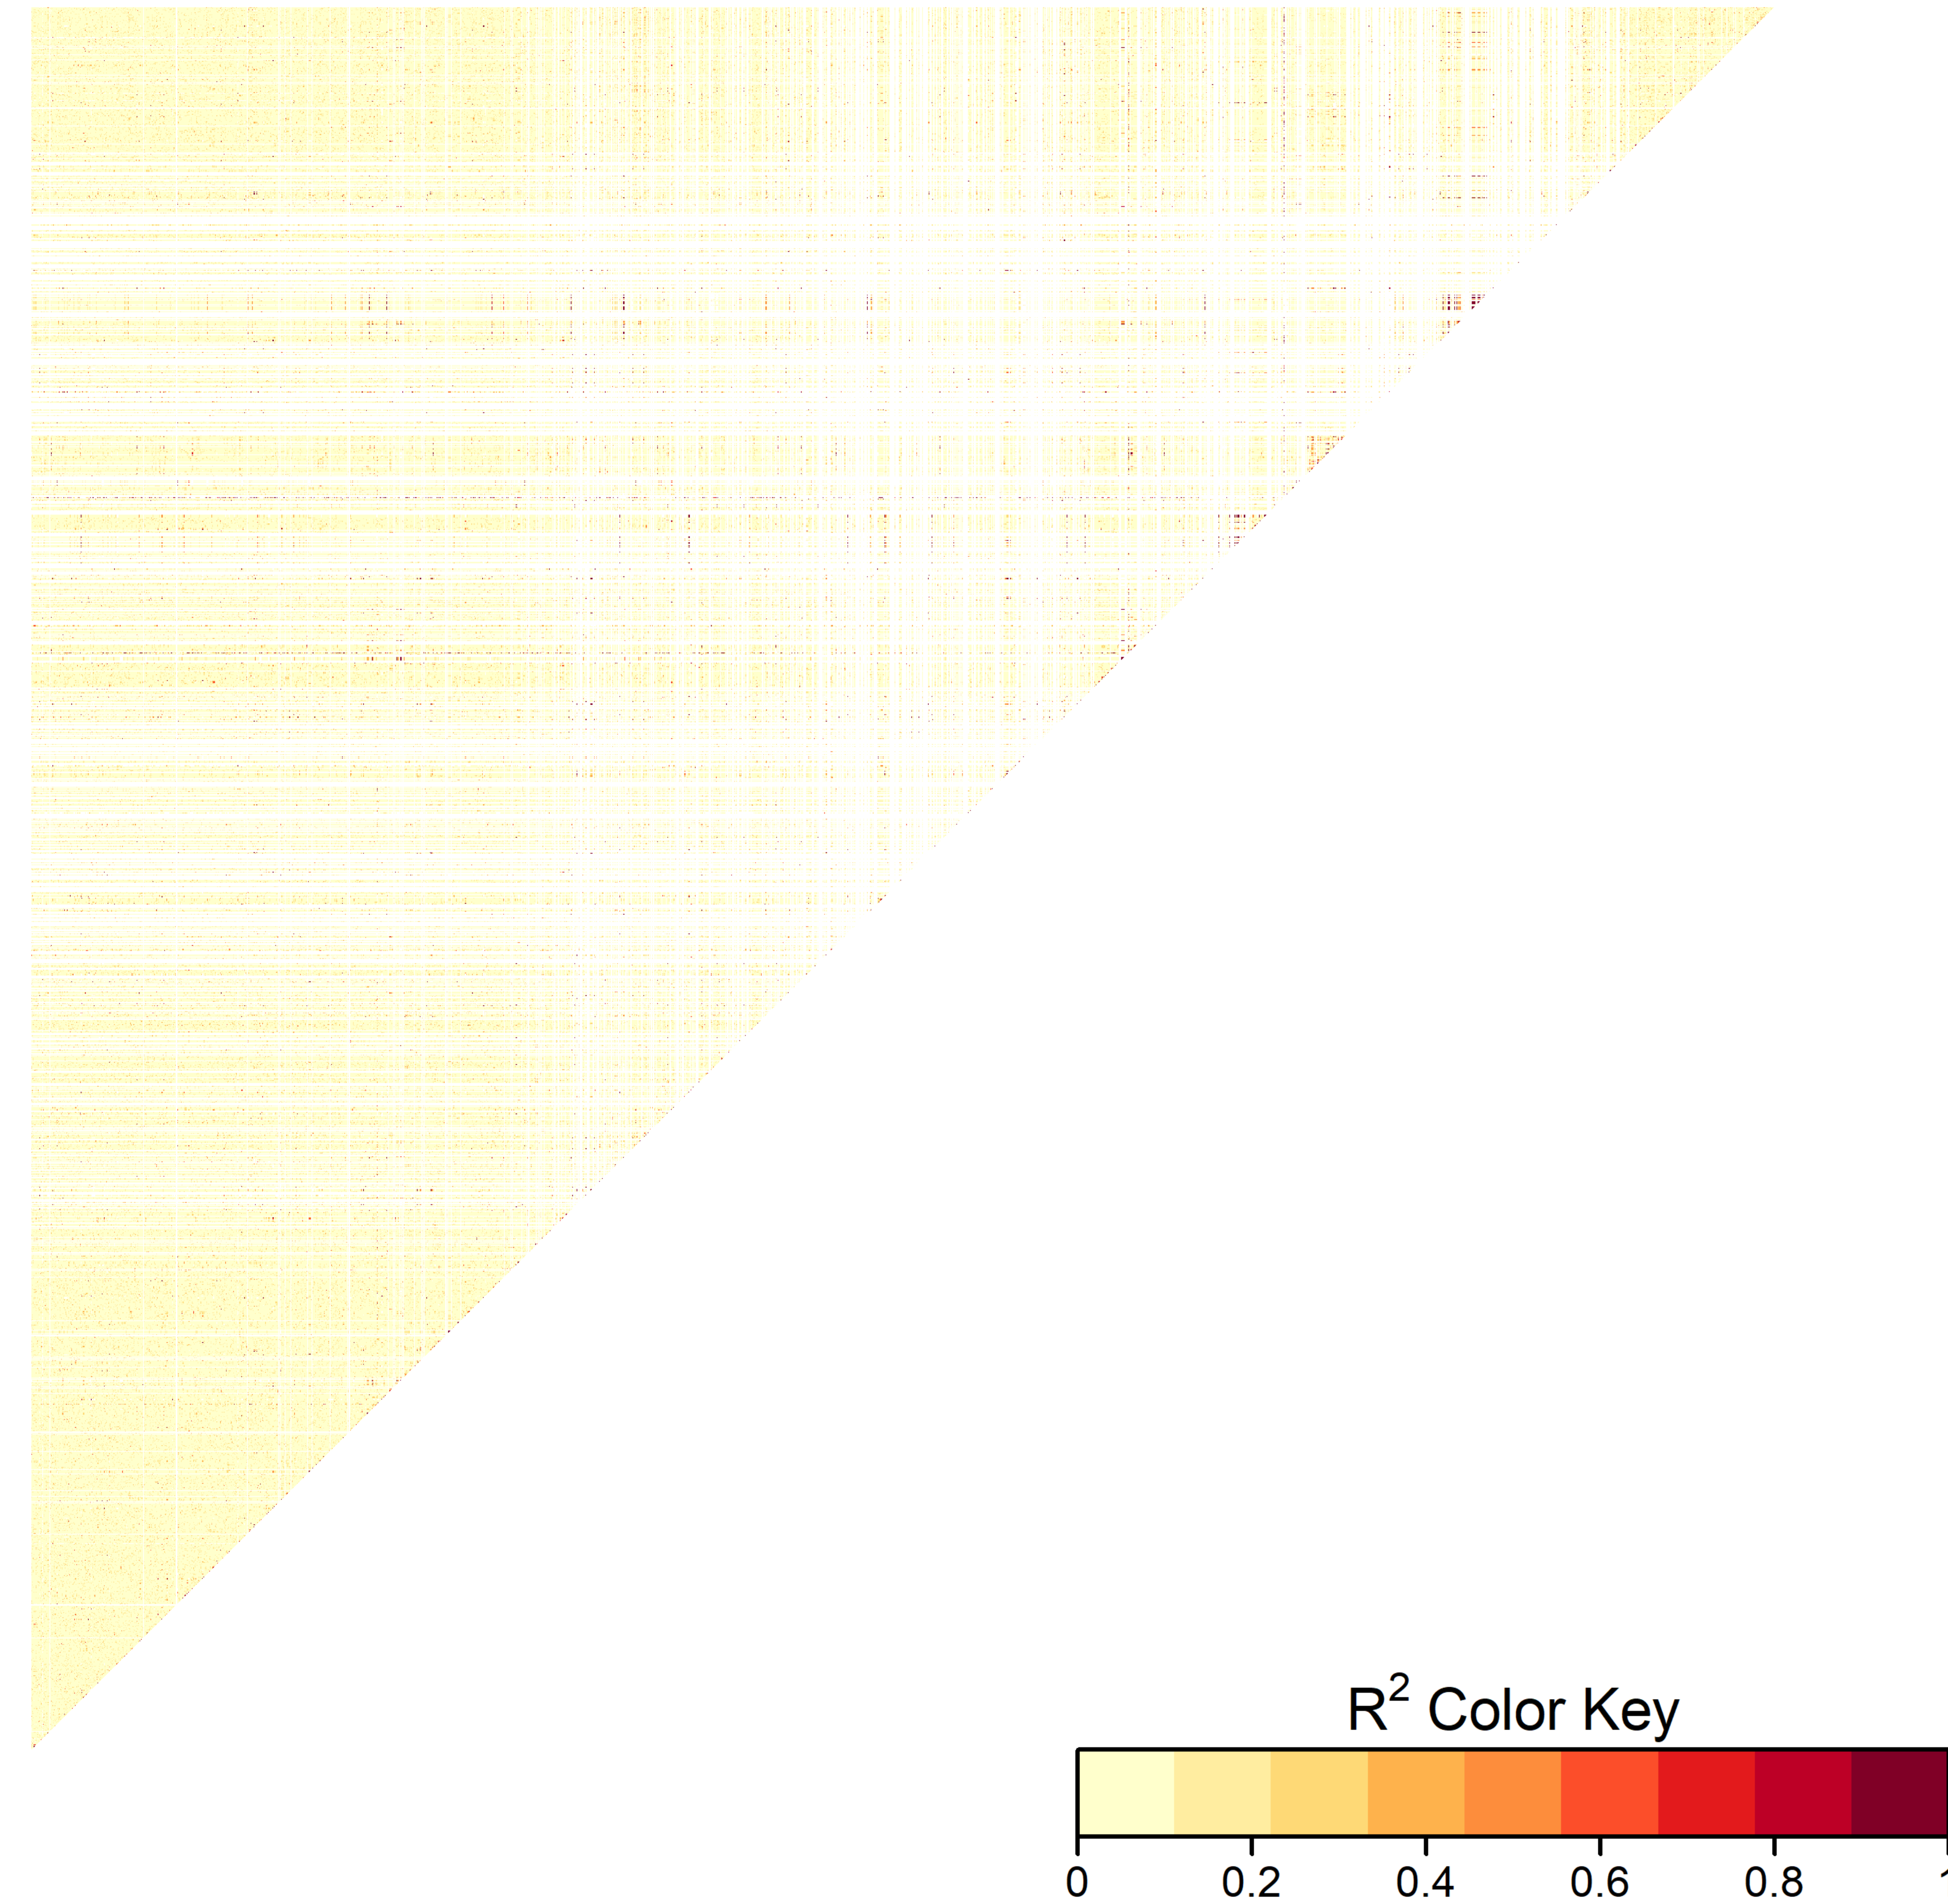



P. maximus - Chromosome 11

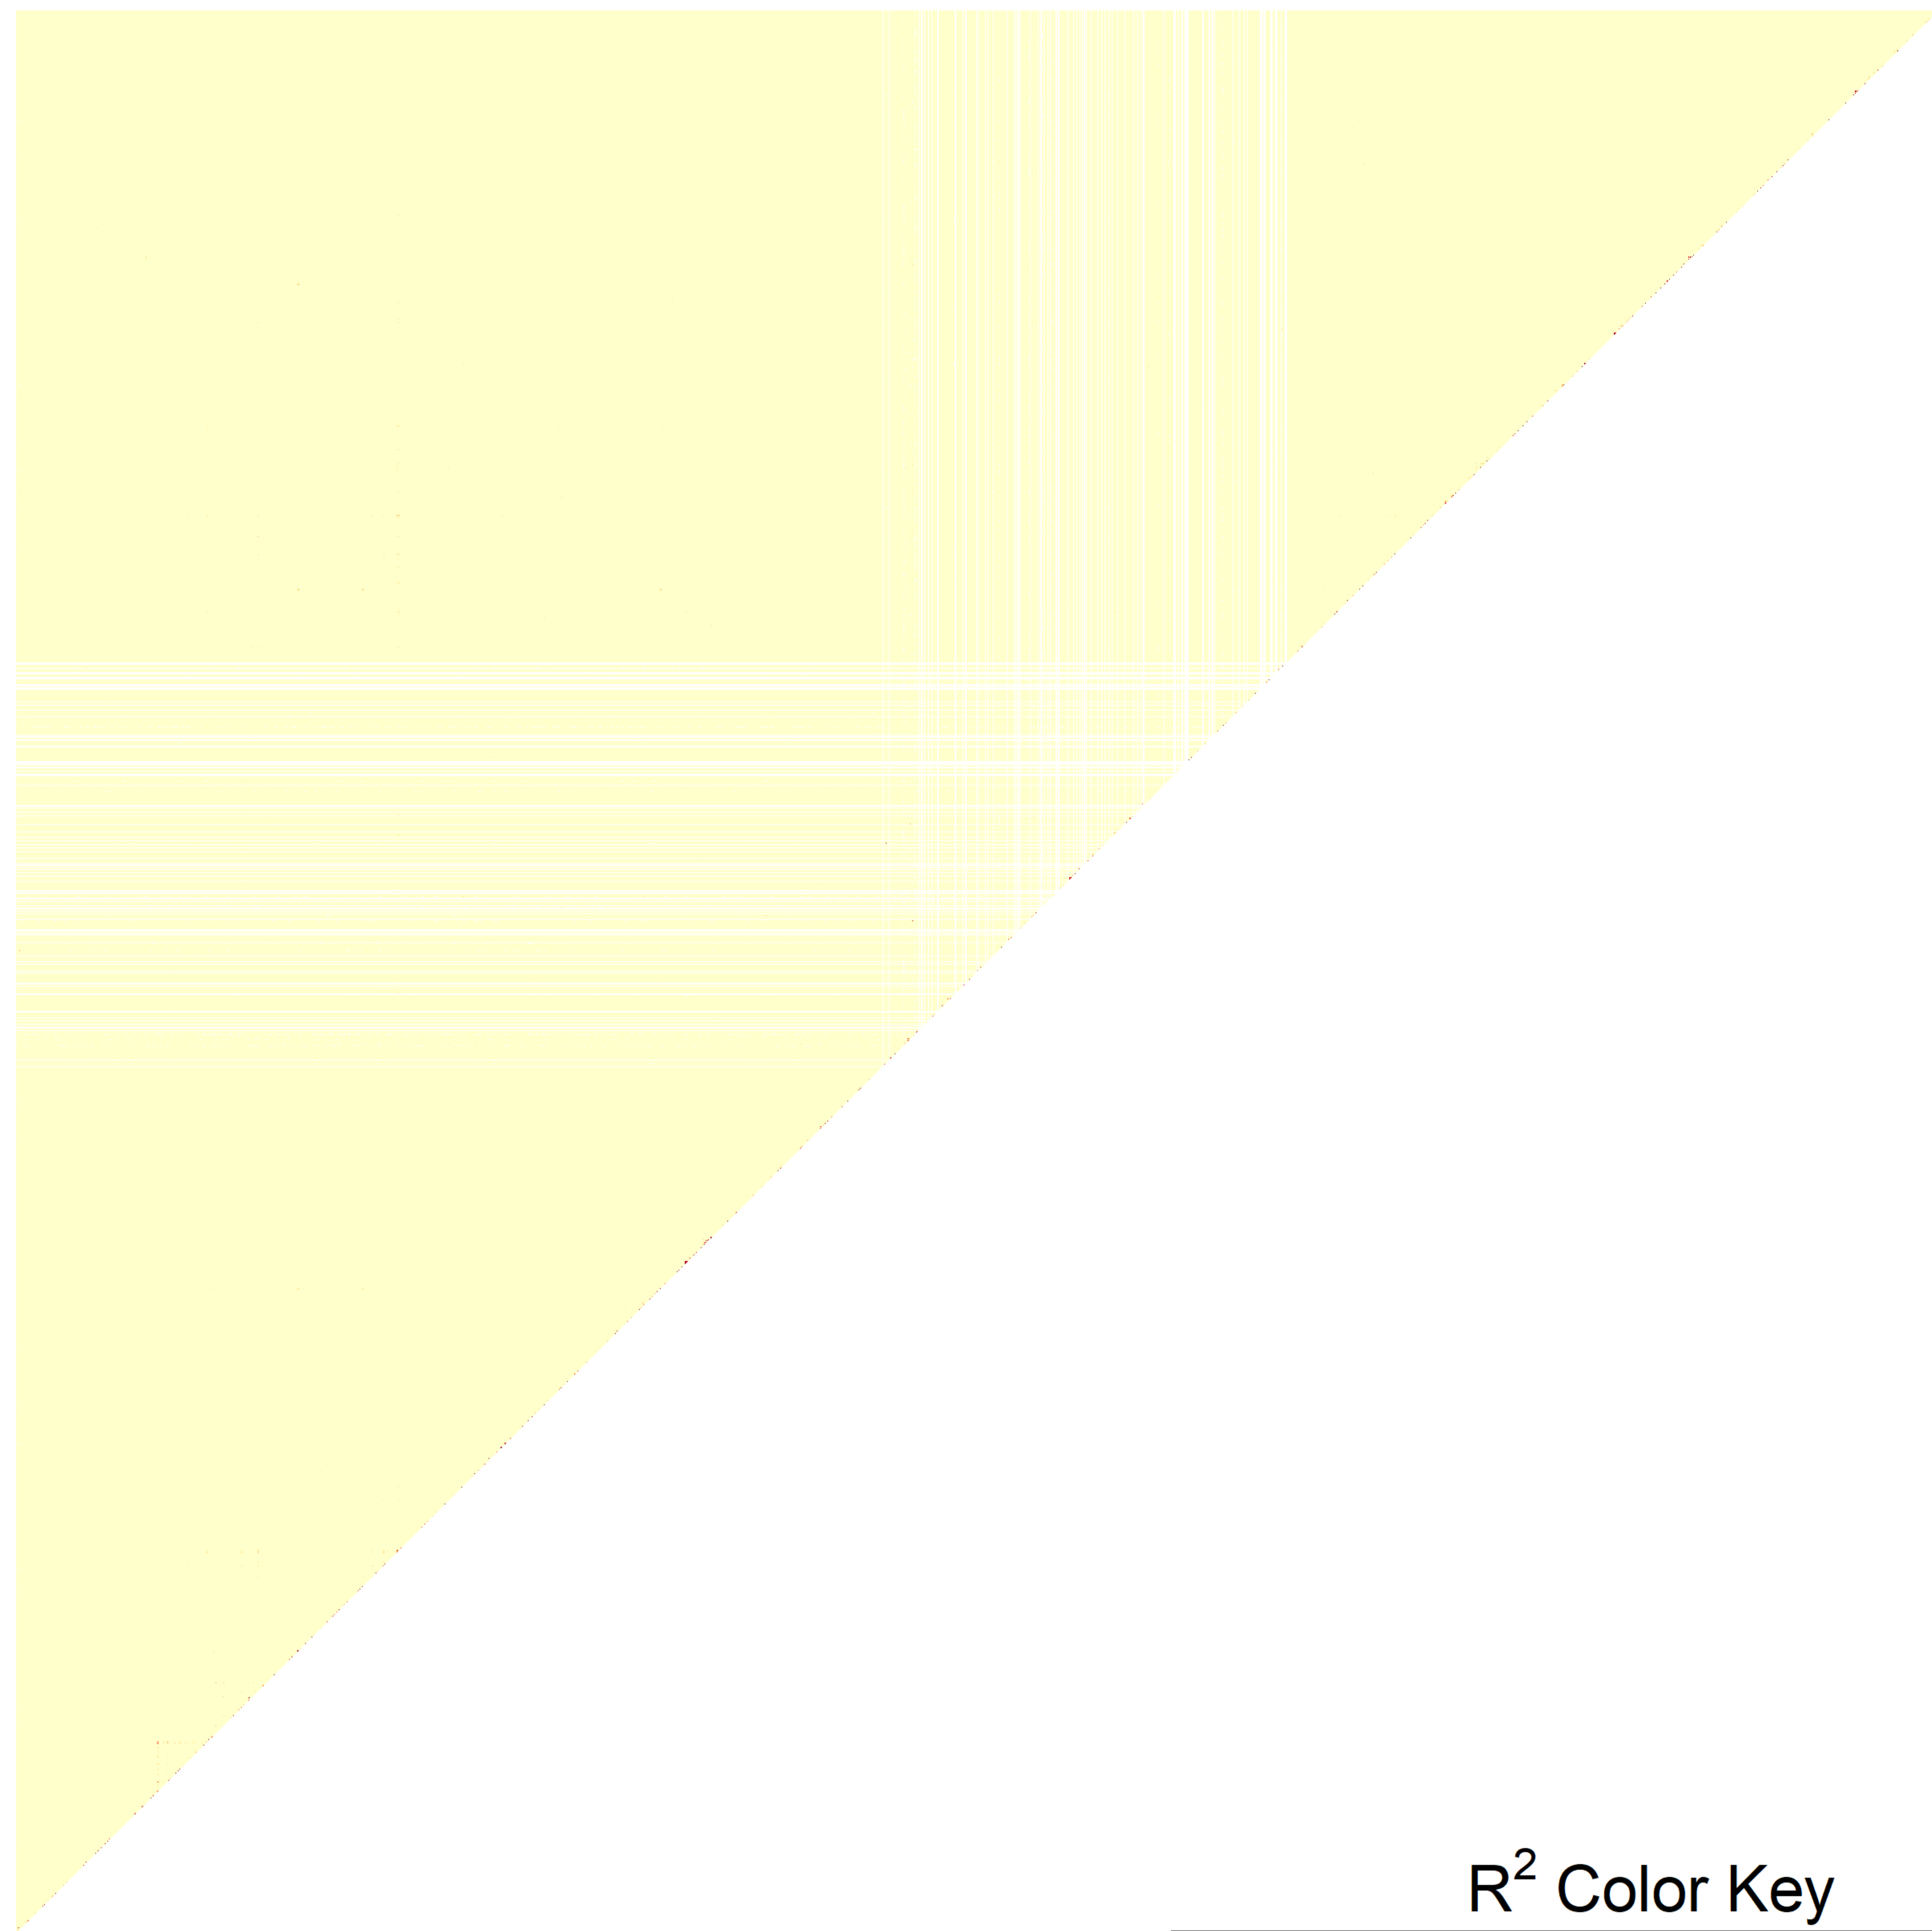

P. jacobaeus - Chromosome 11

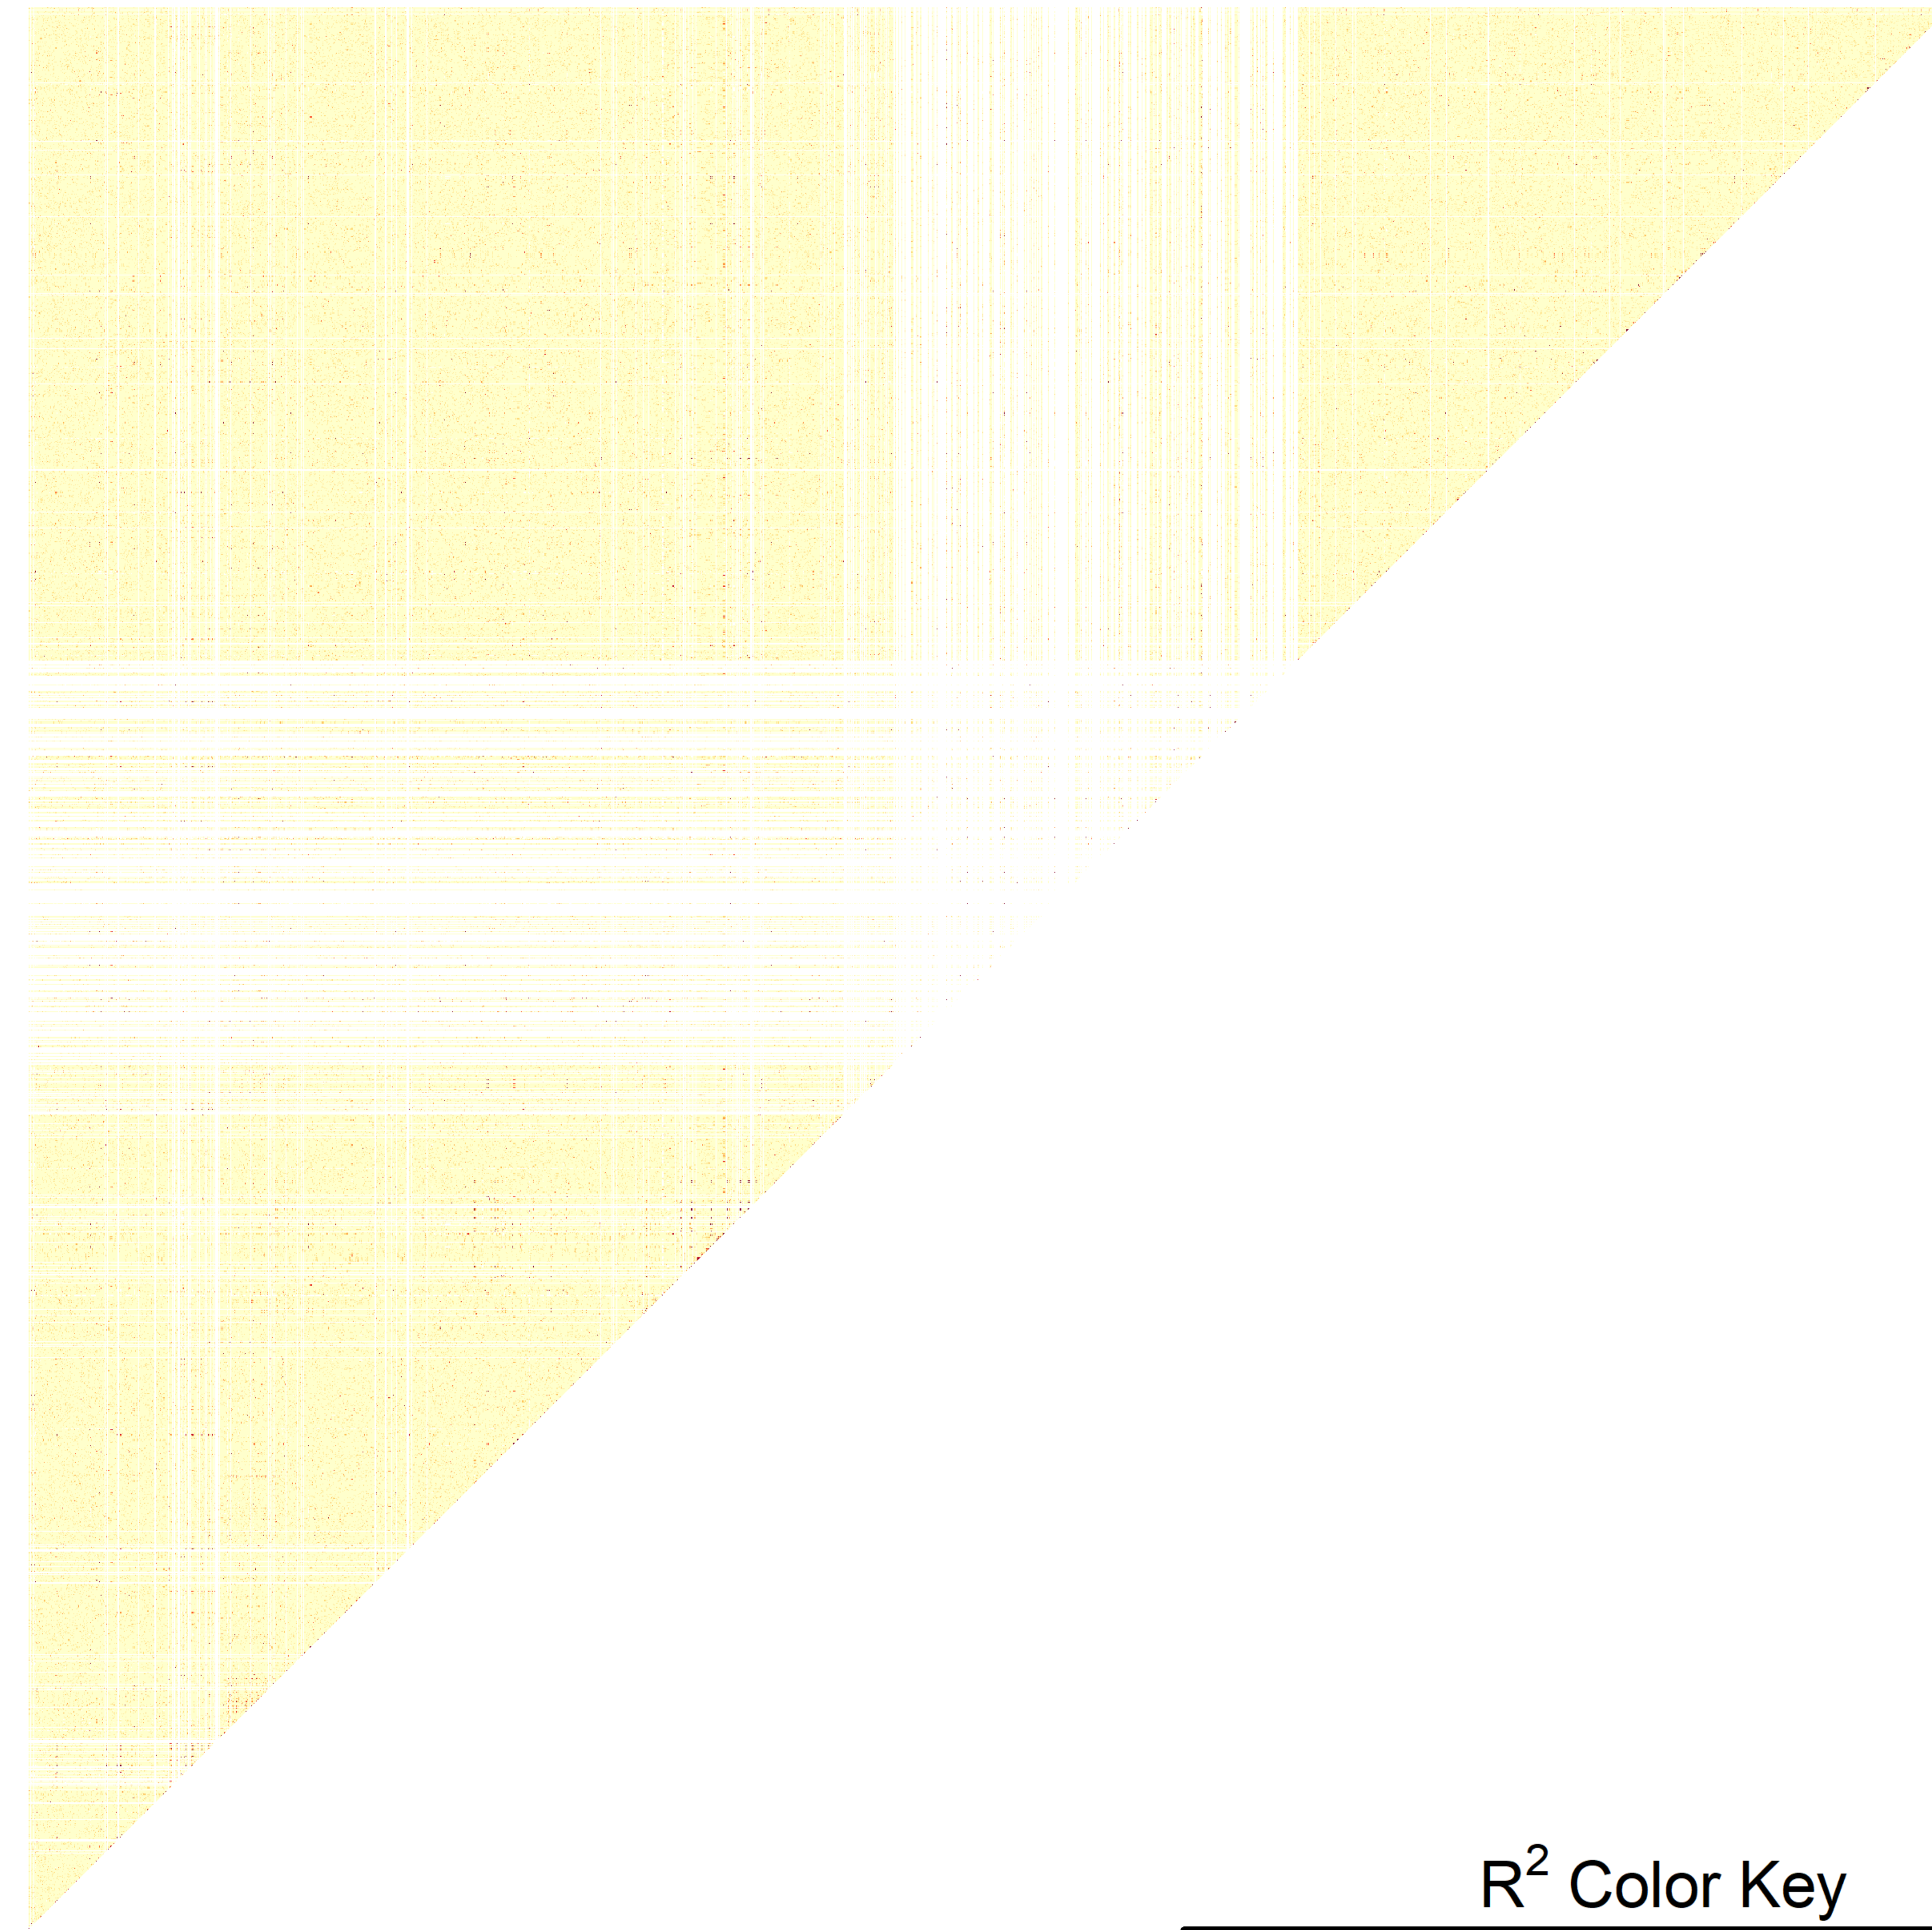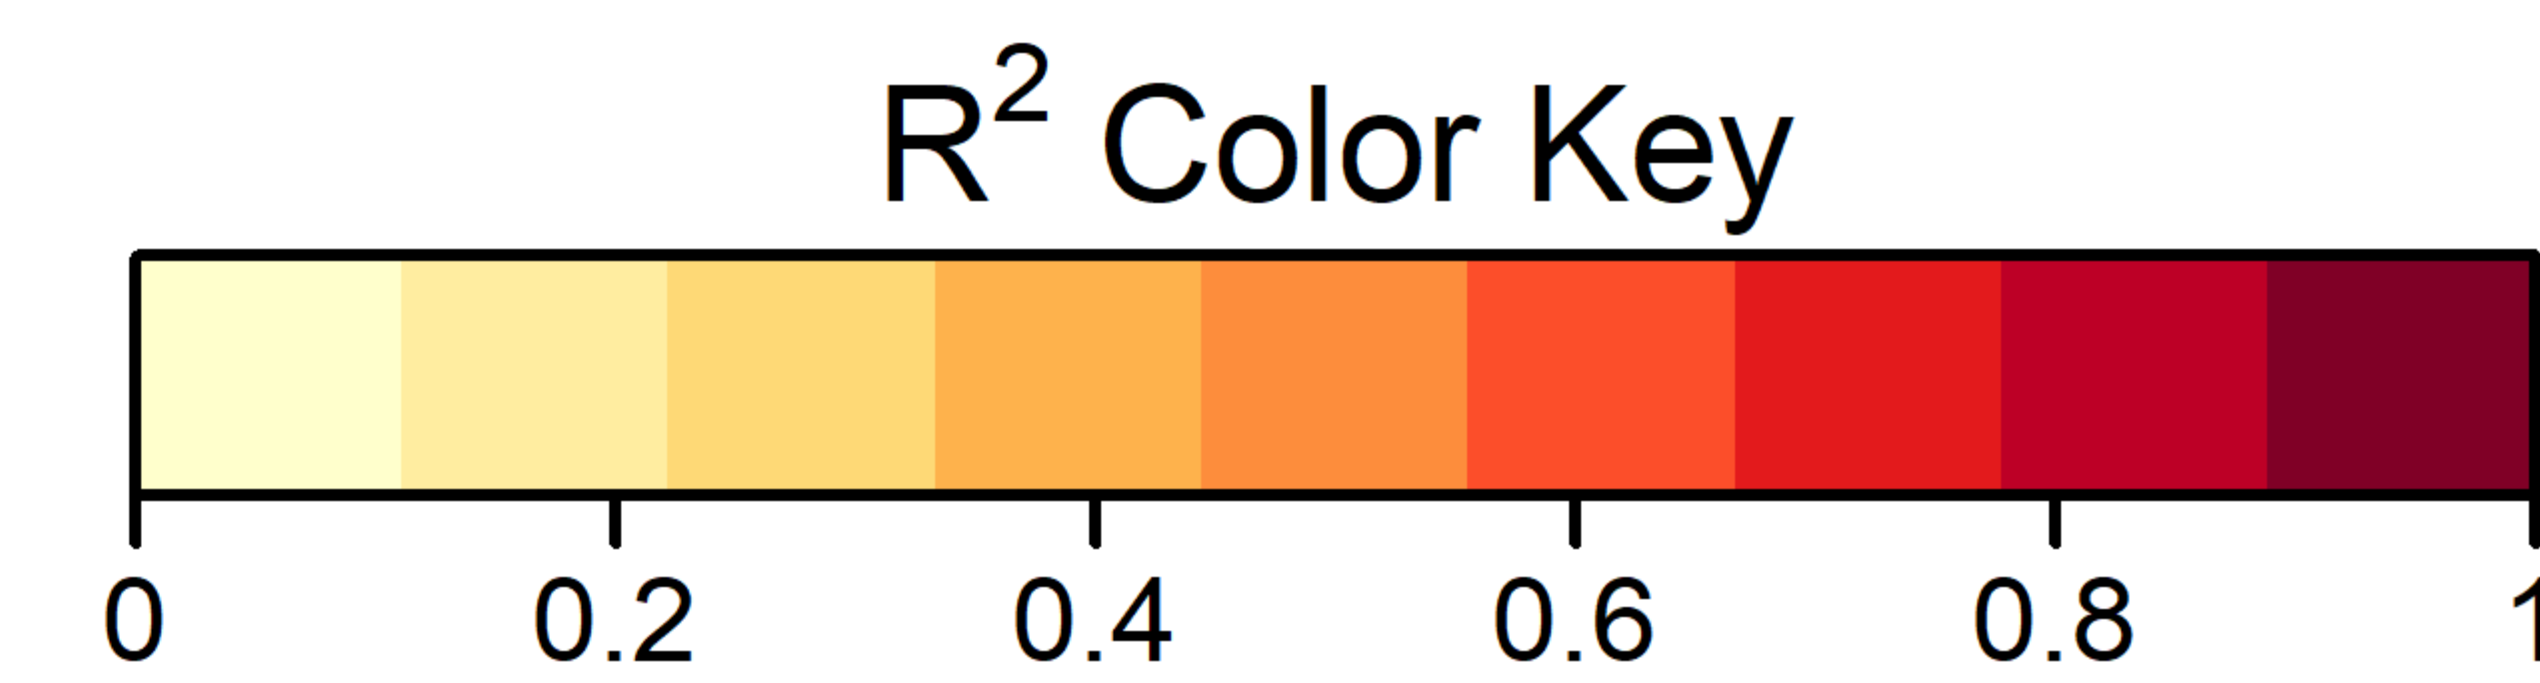



P. maximus - Chromosome 12

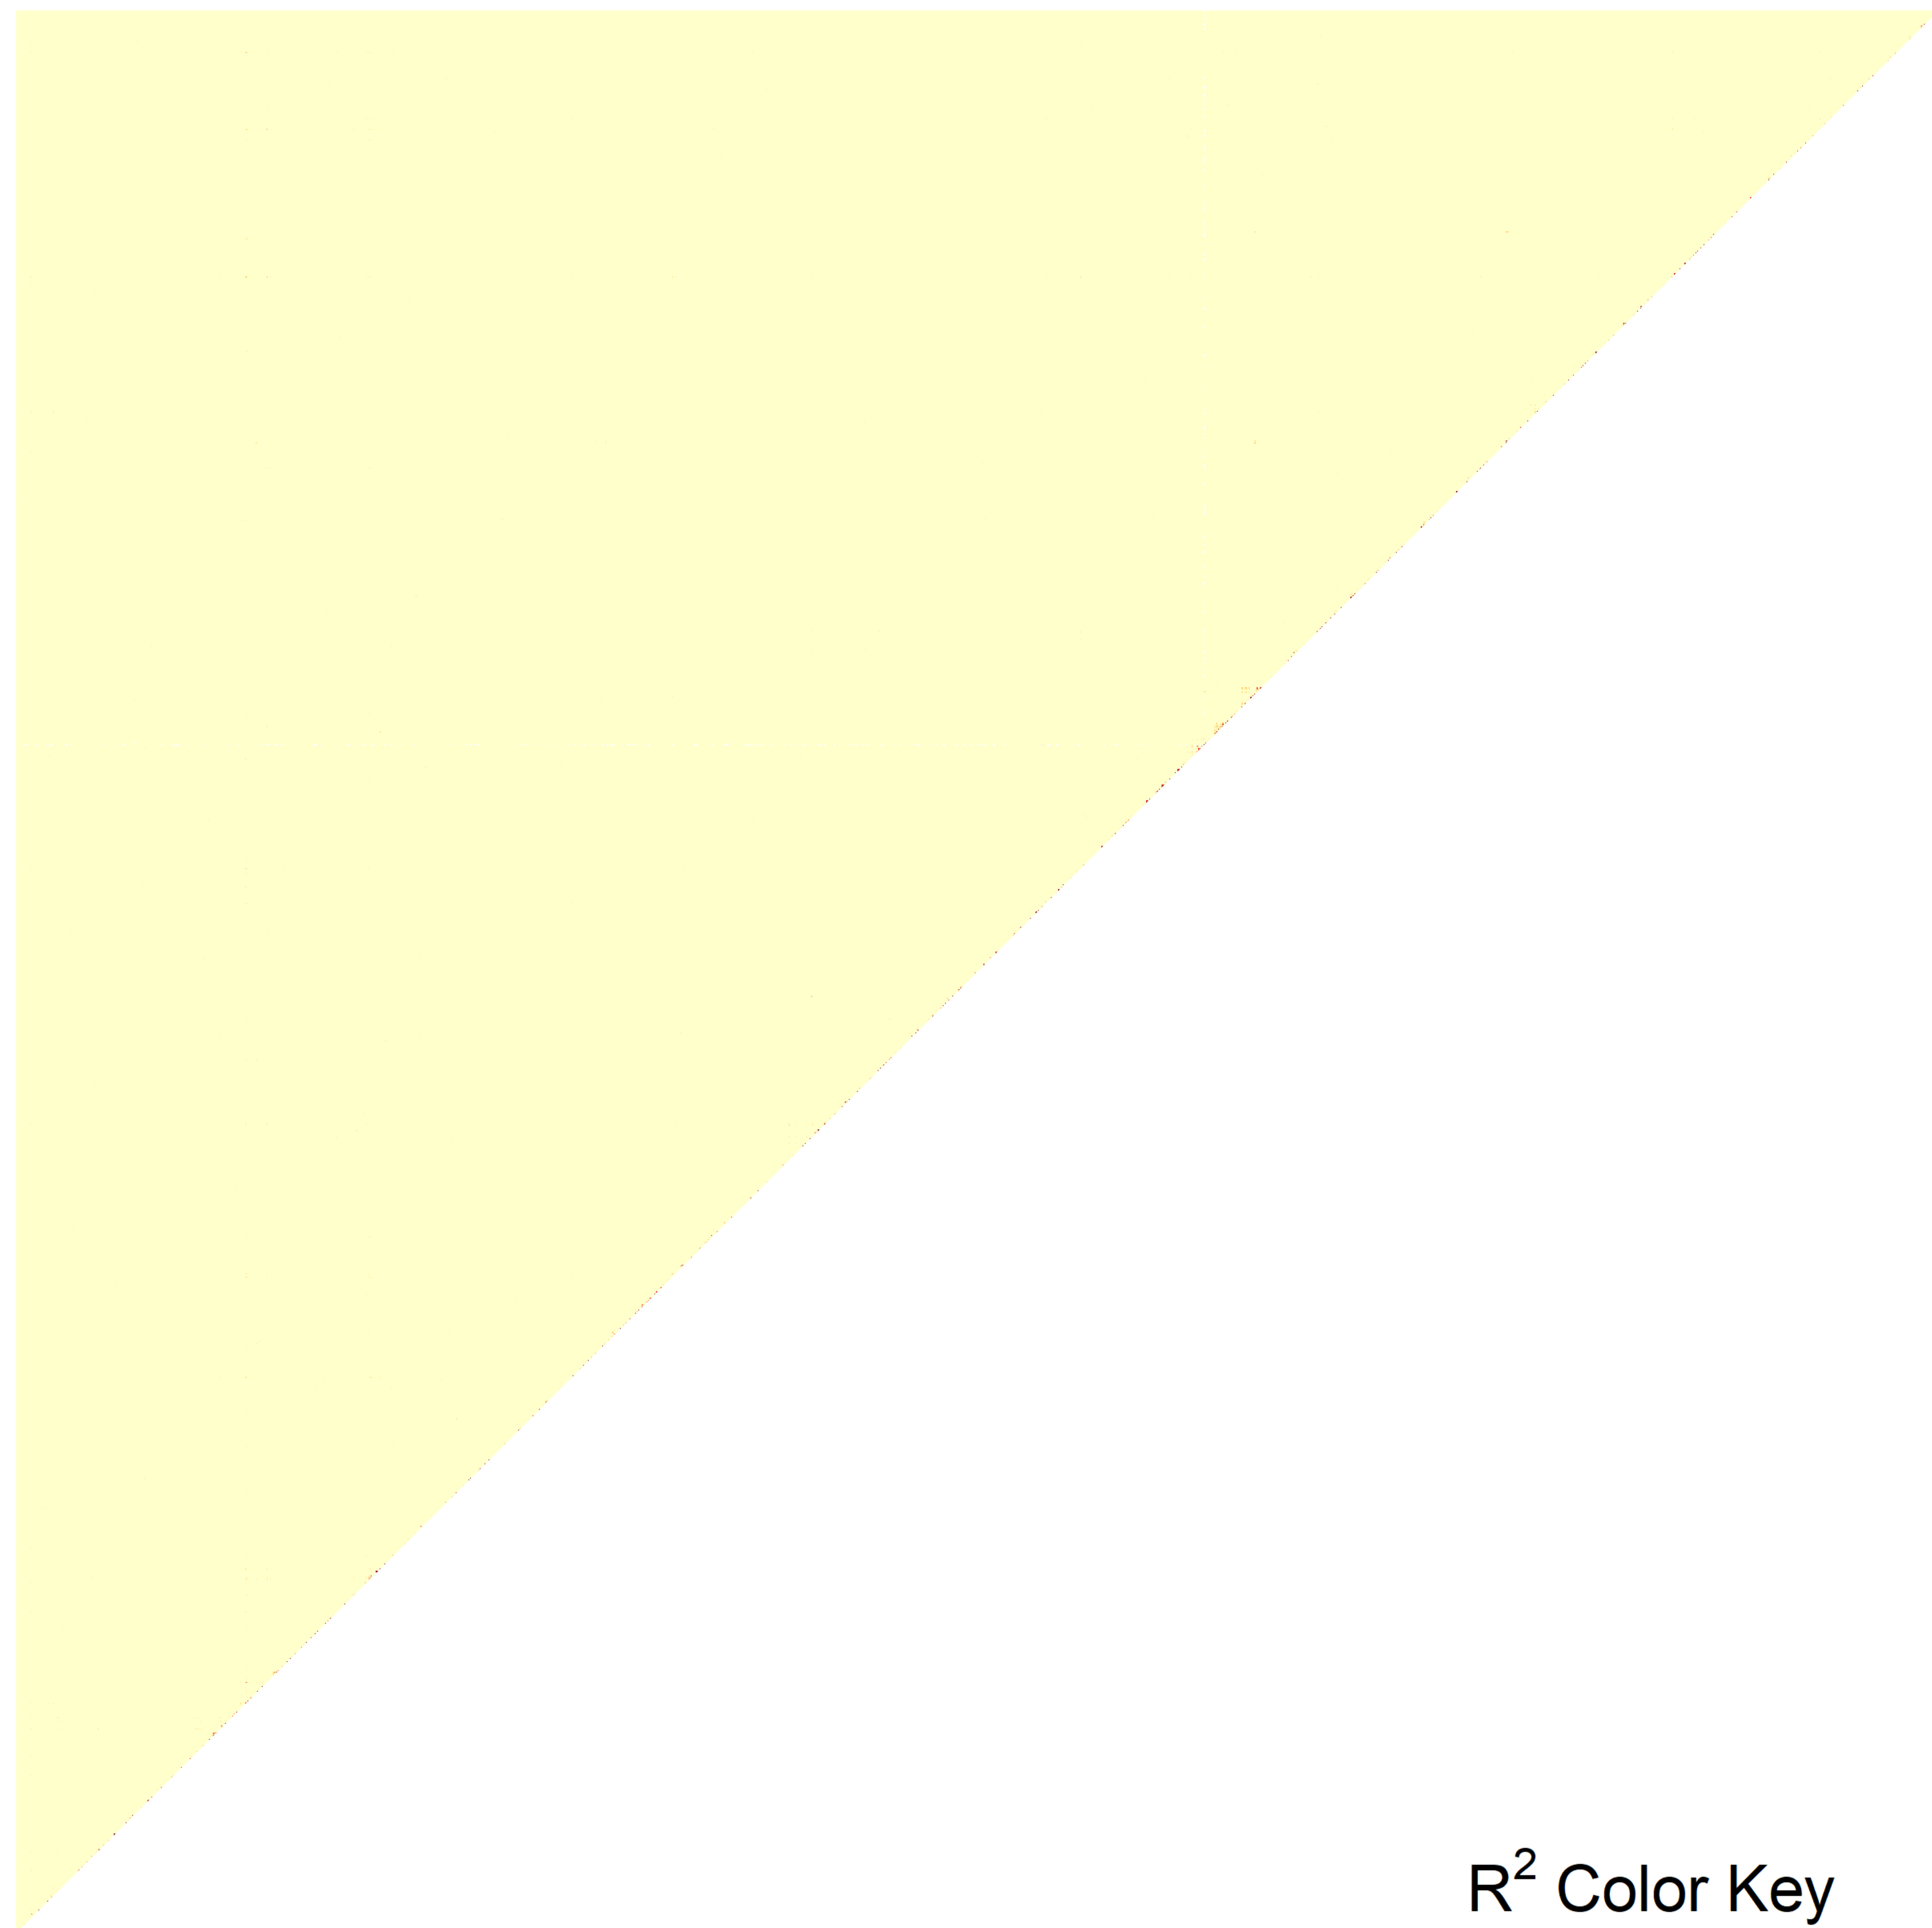

P. jacobaeus - Chromosome 12

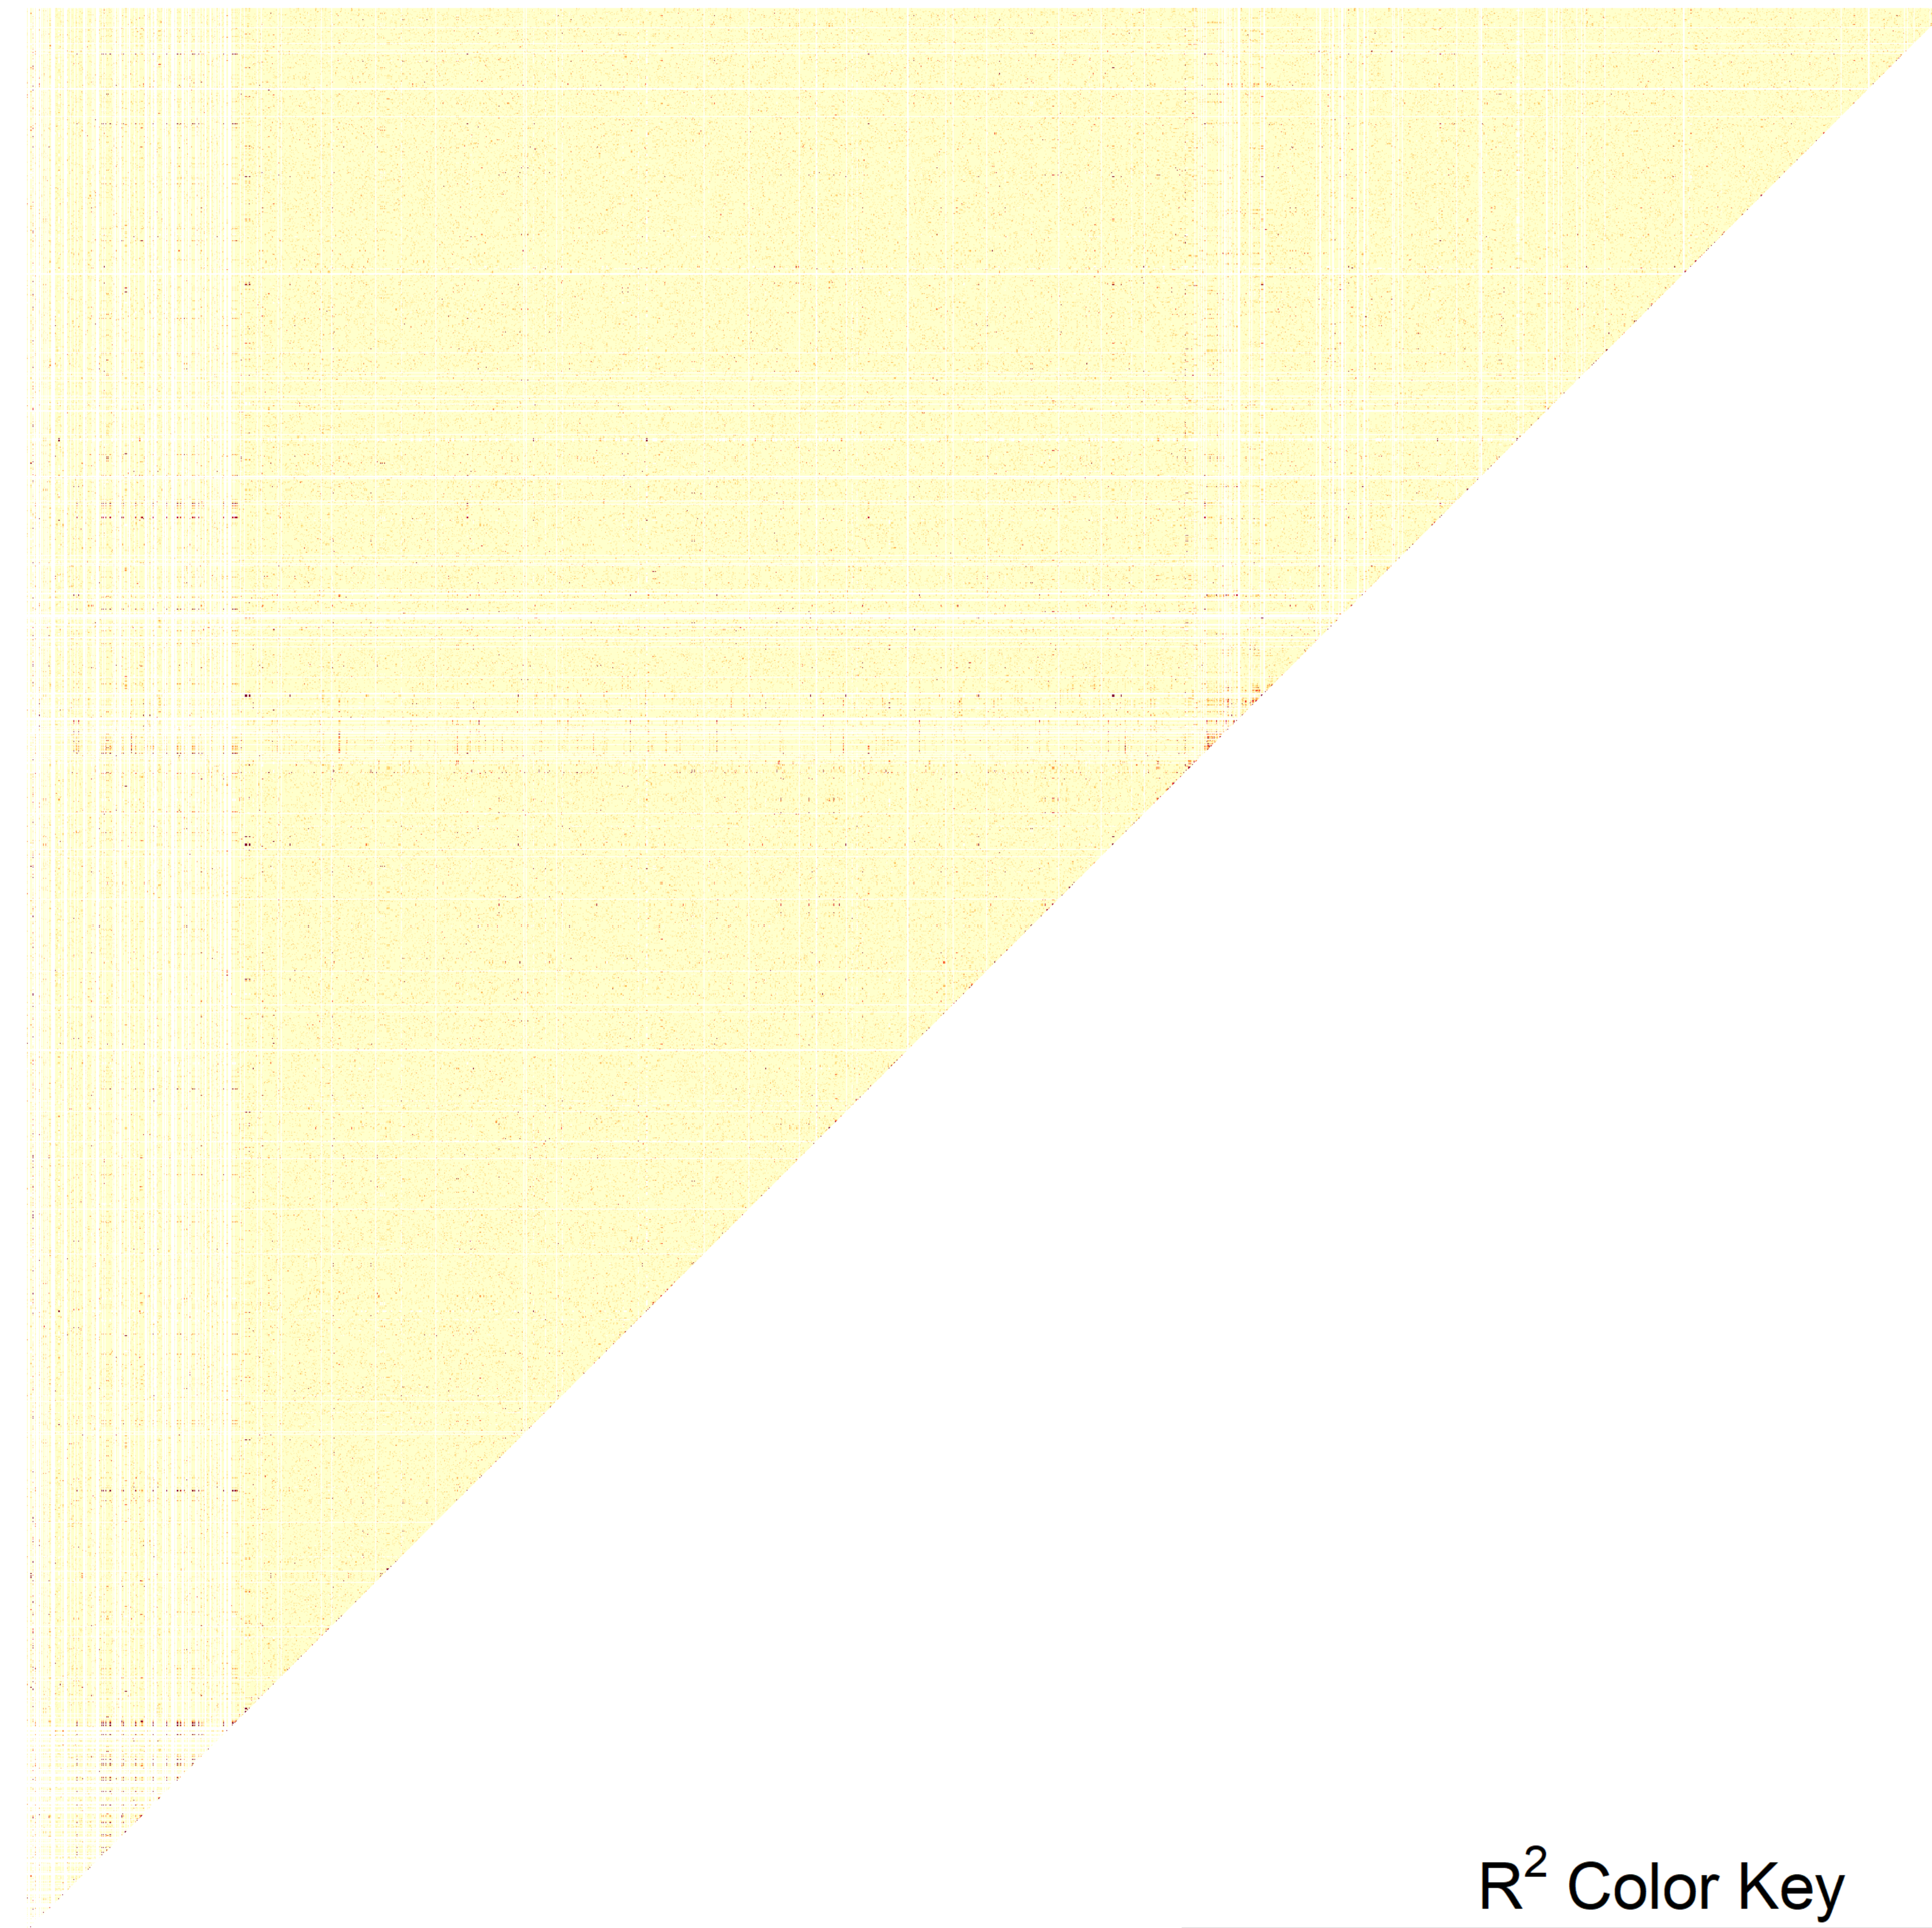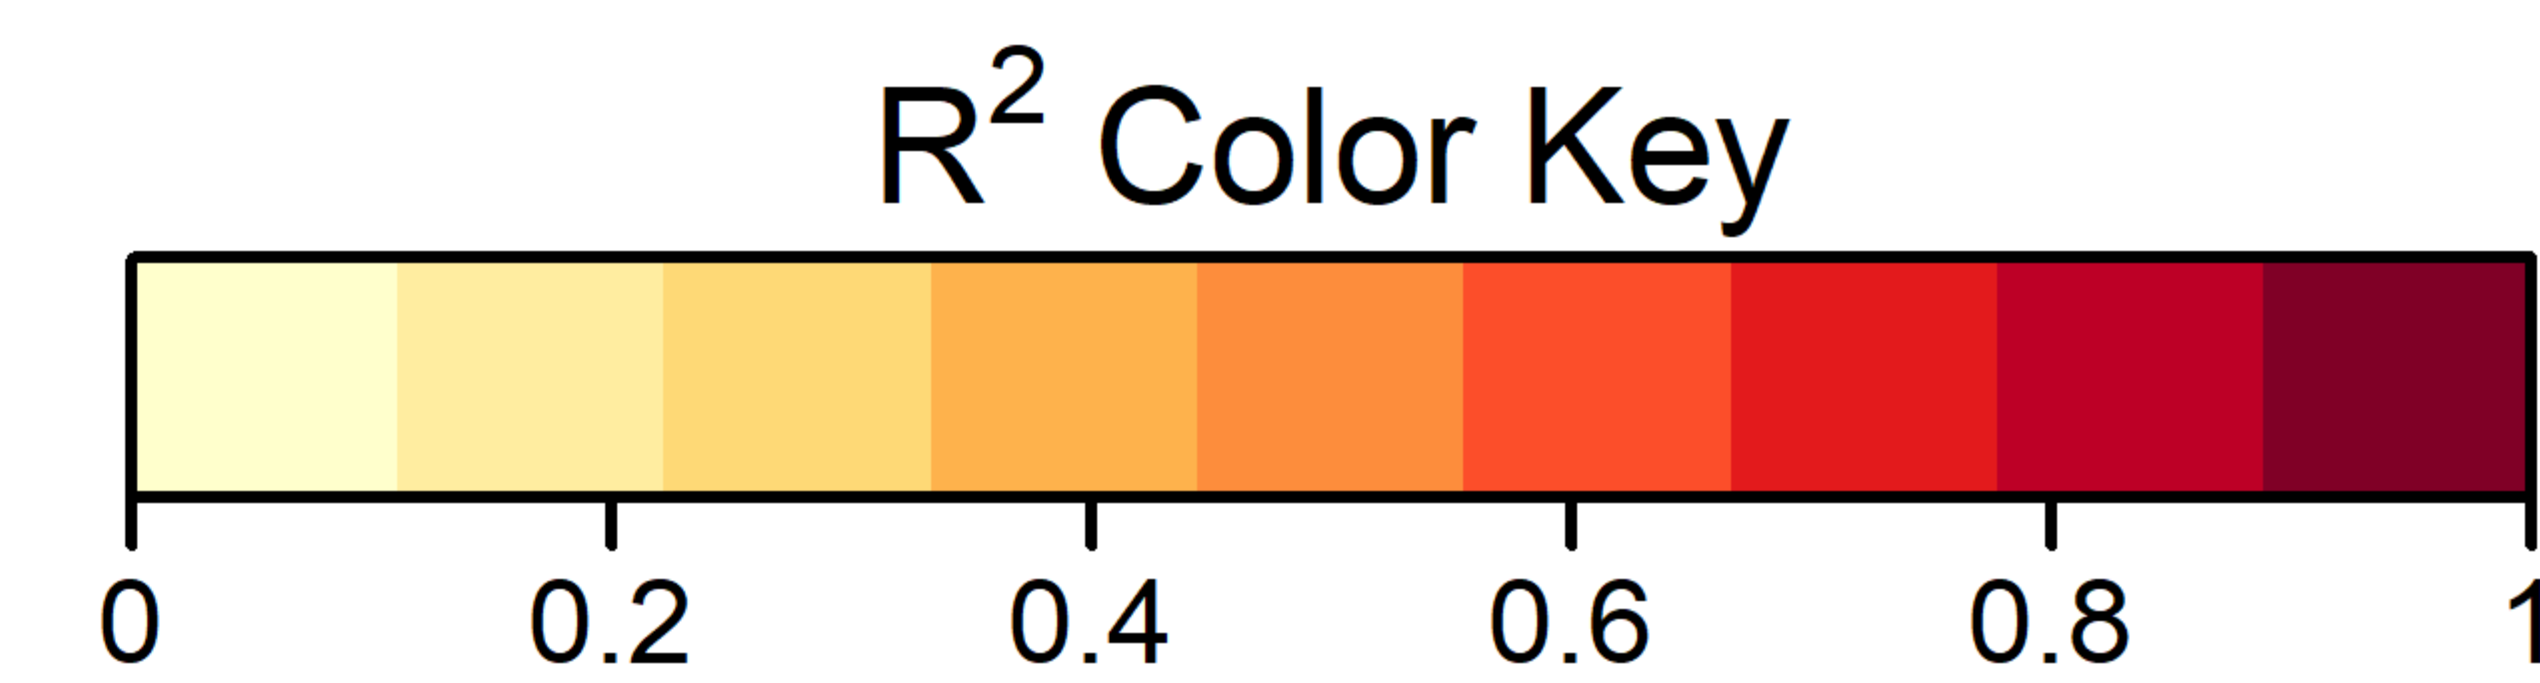



P. maximus - Chromosome 13

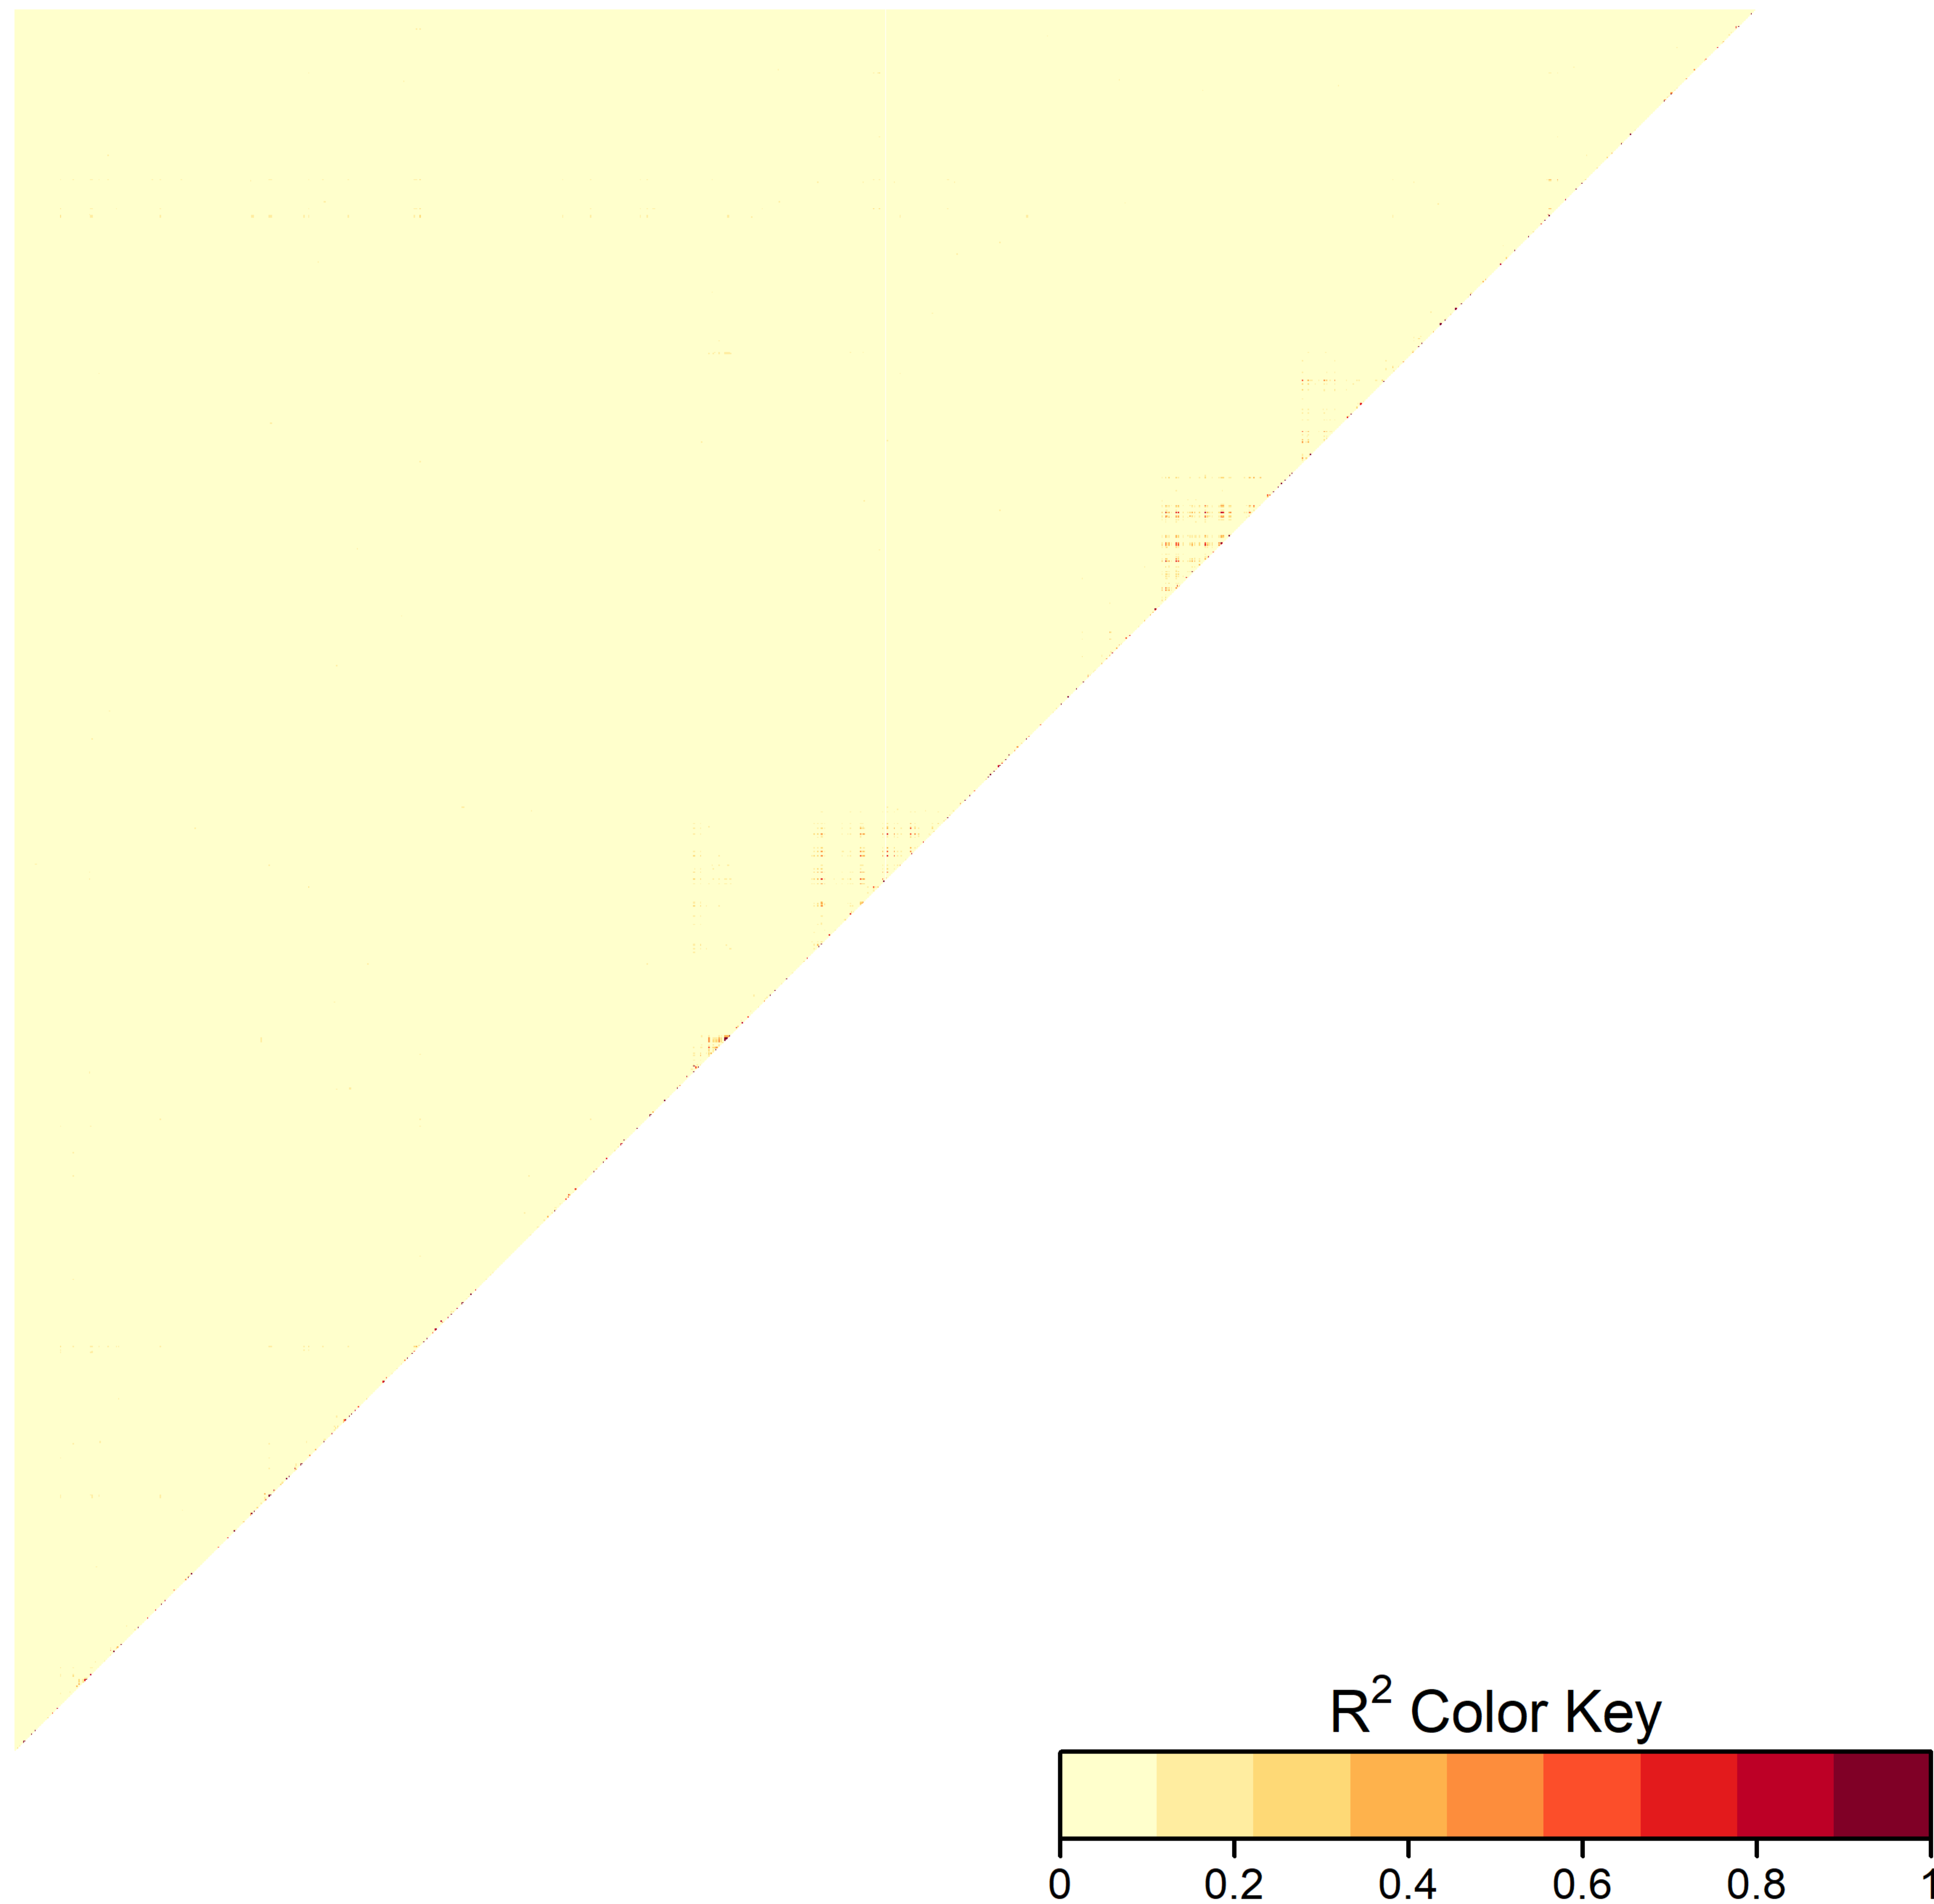

P. jacobaeus - Chromosome 13

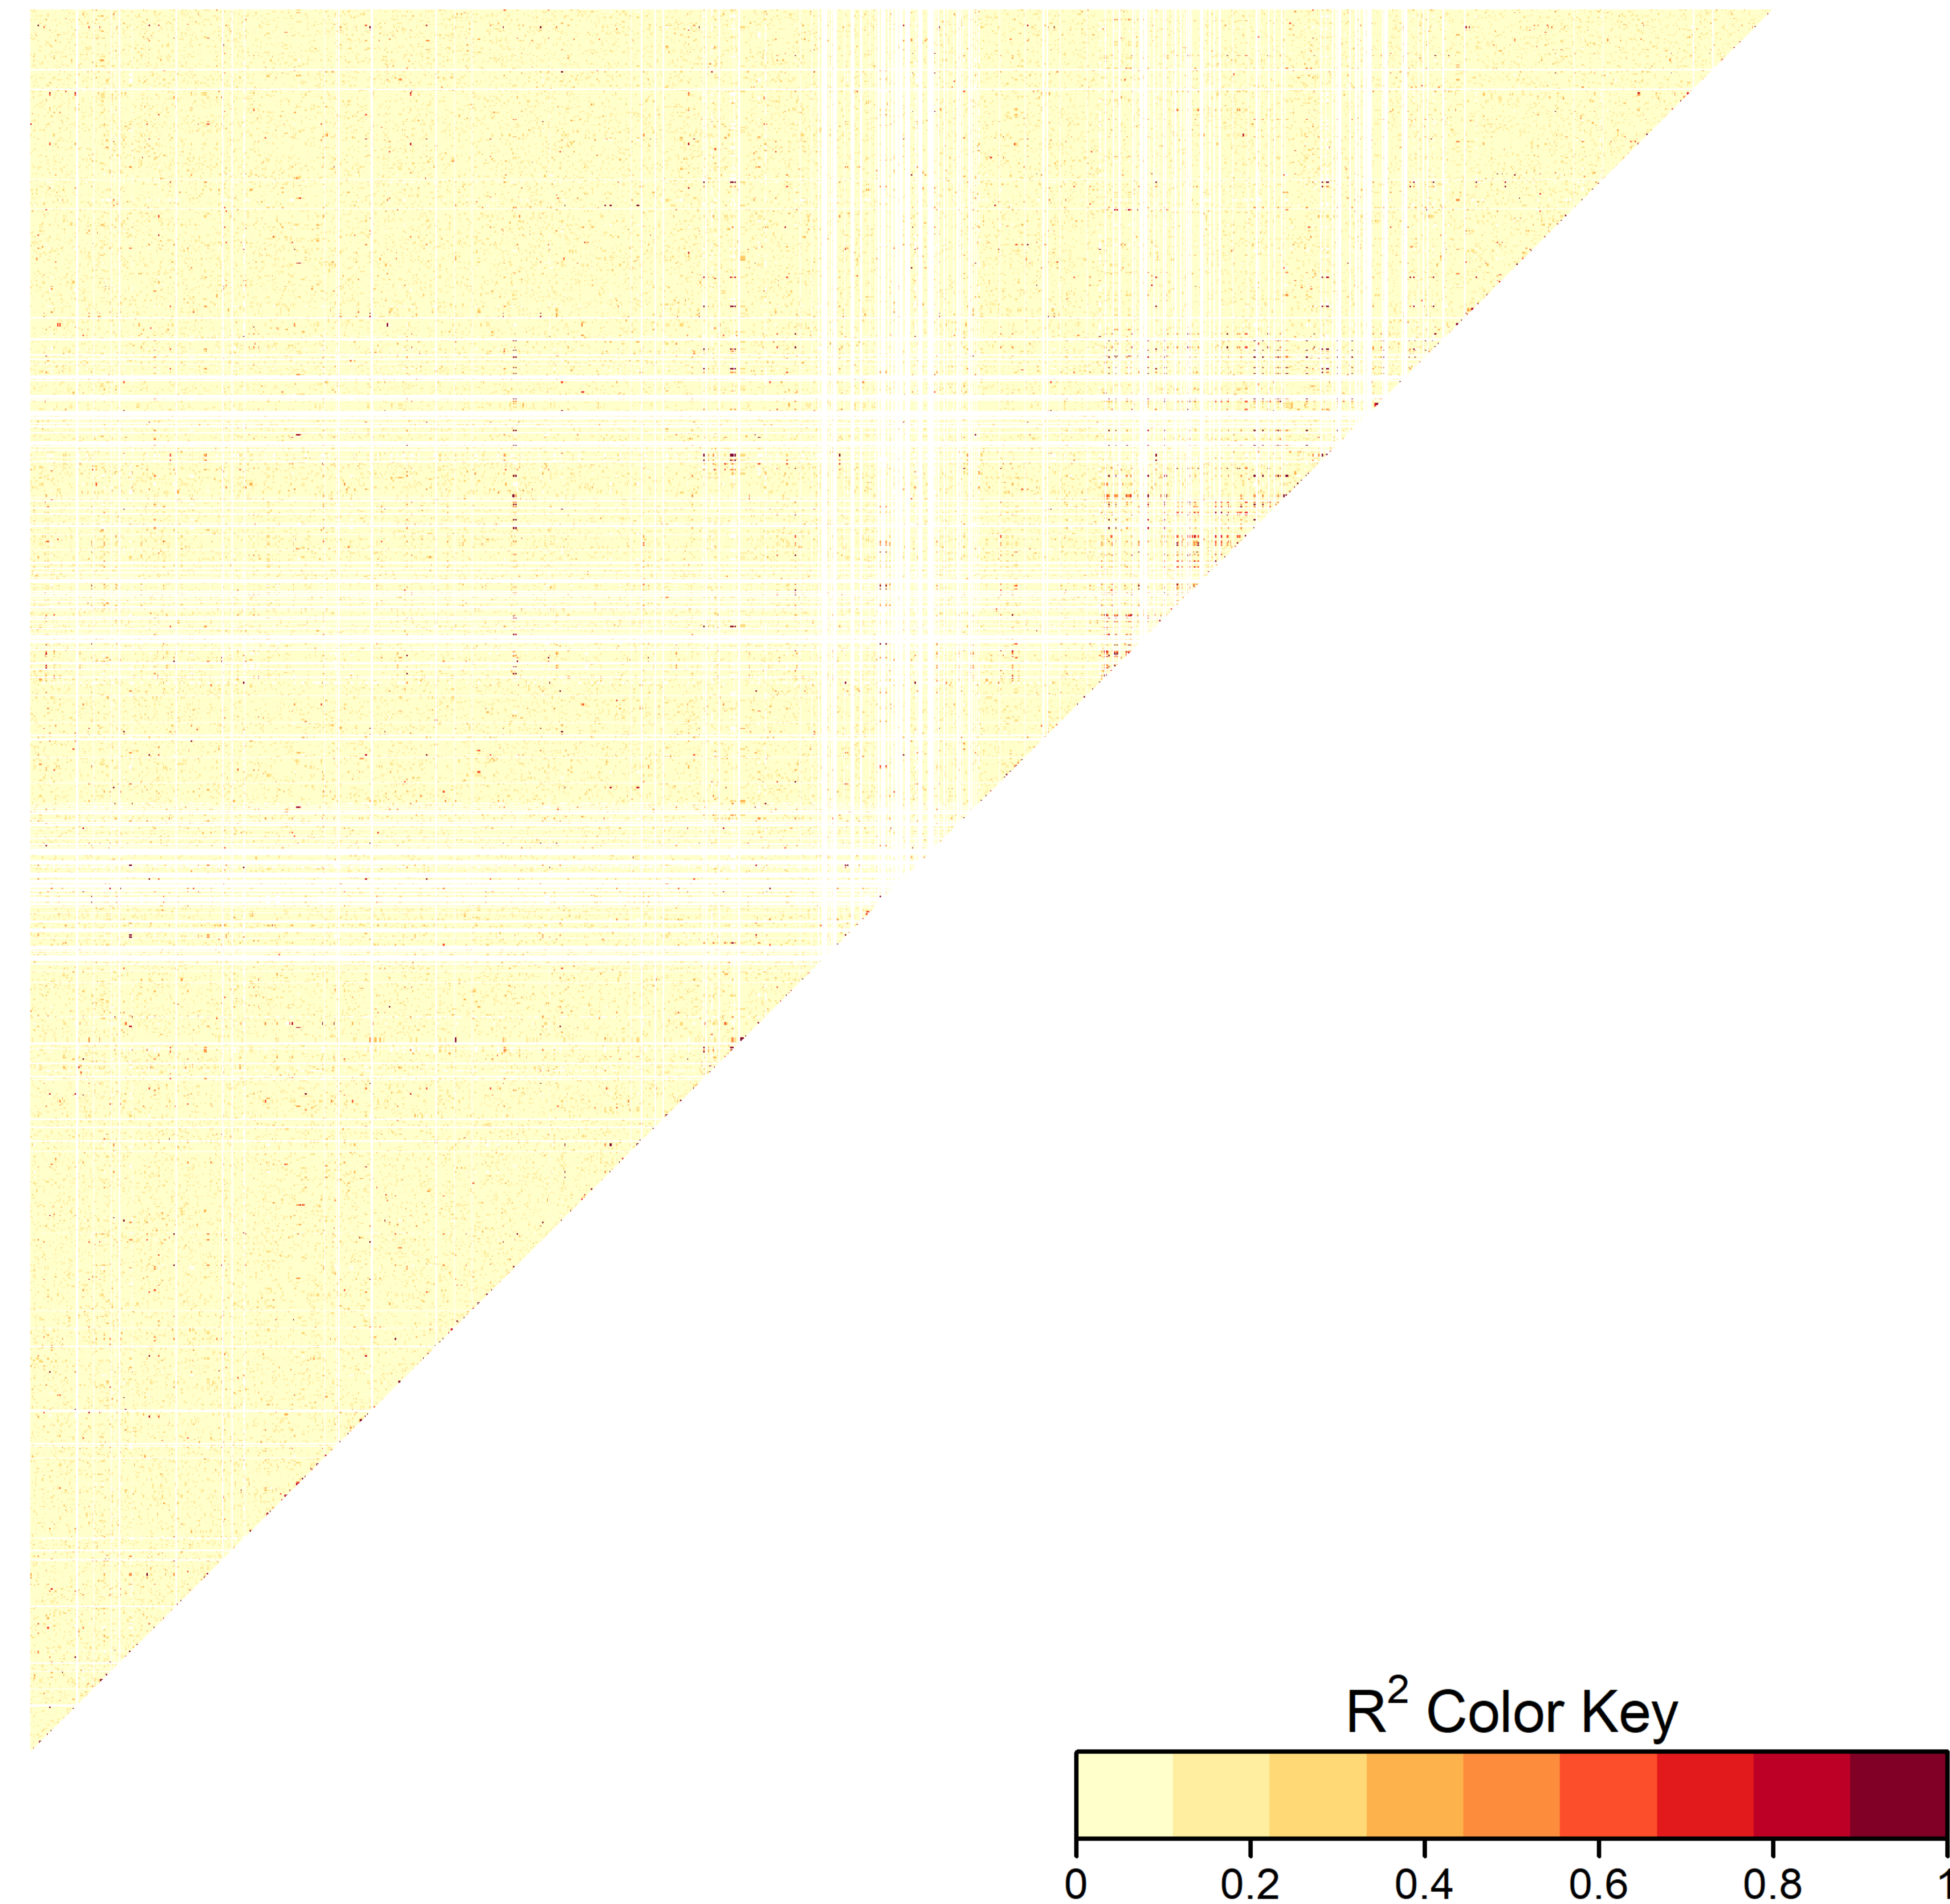



P. maximus - Chromosome 14

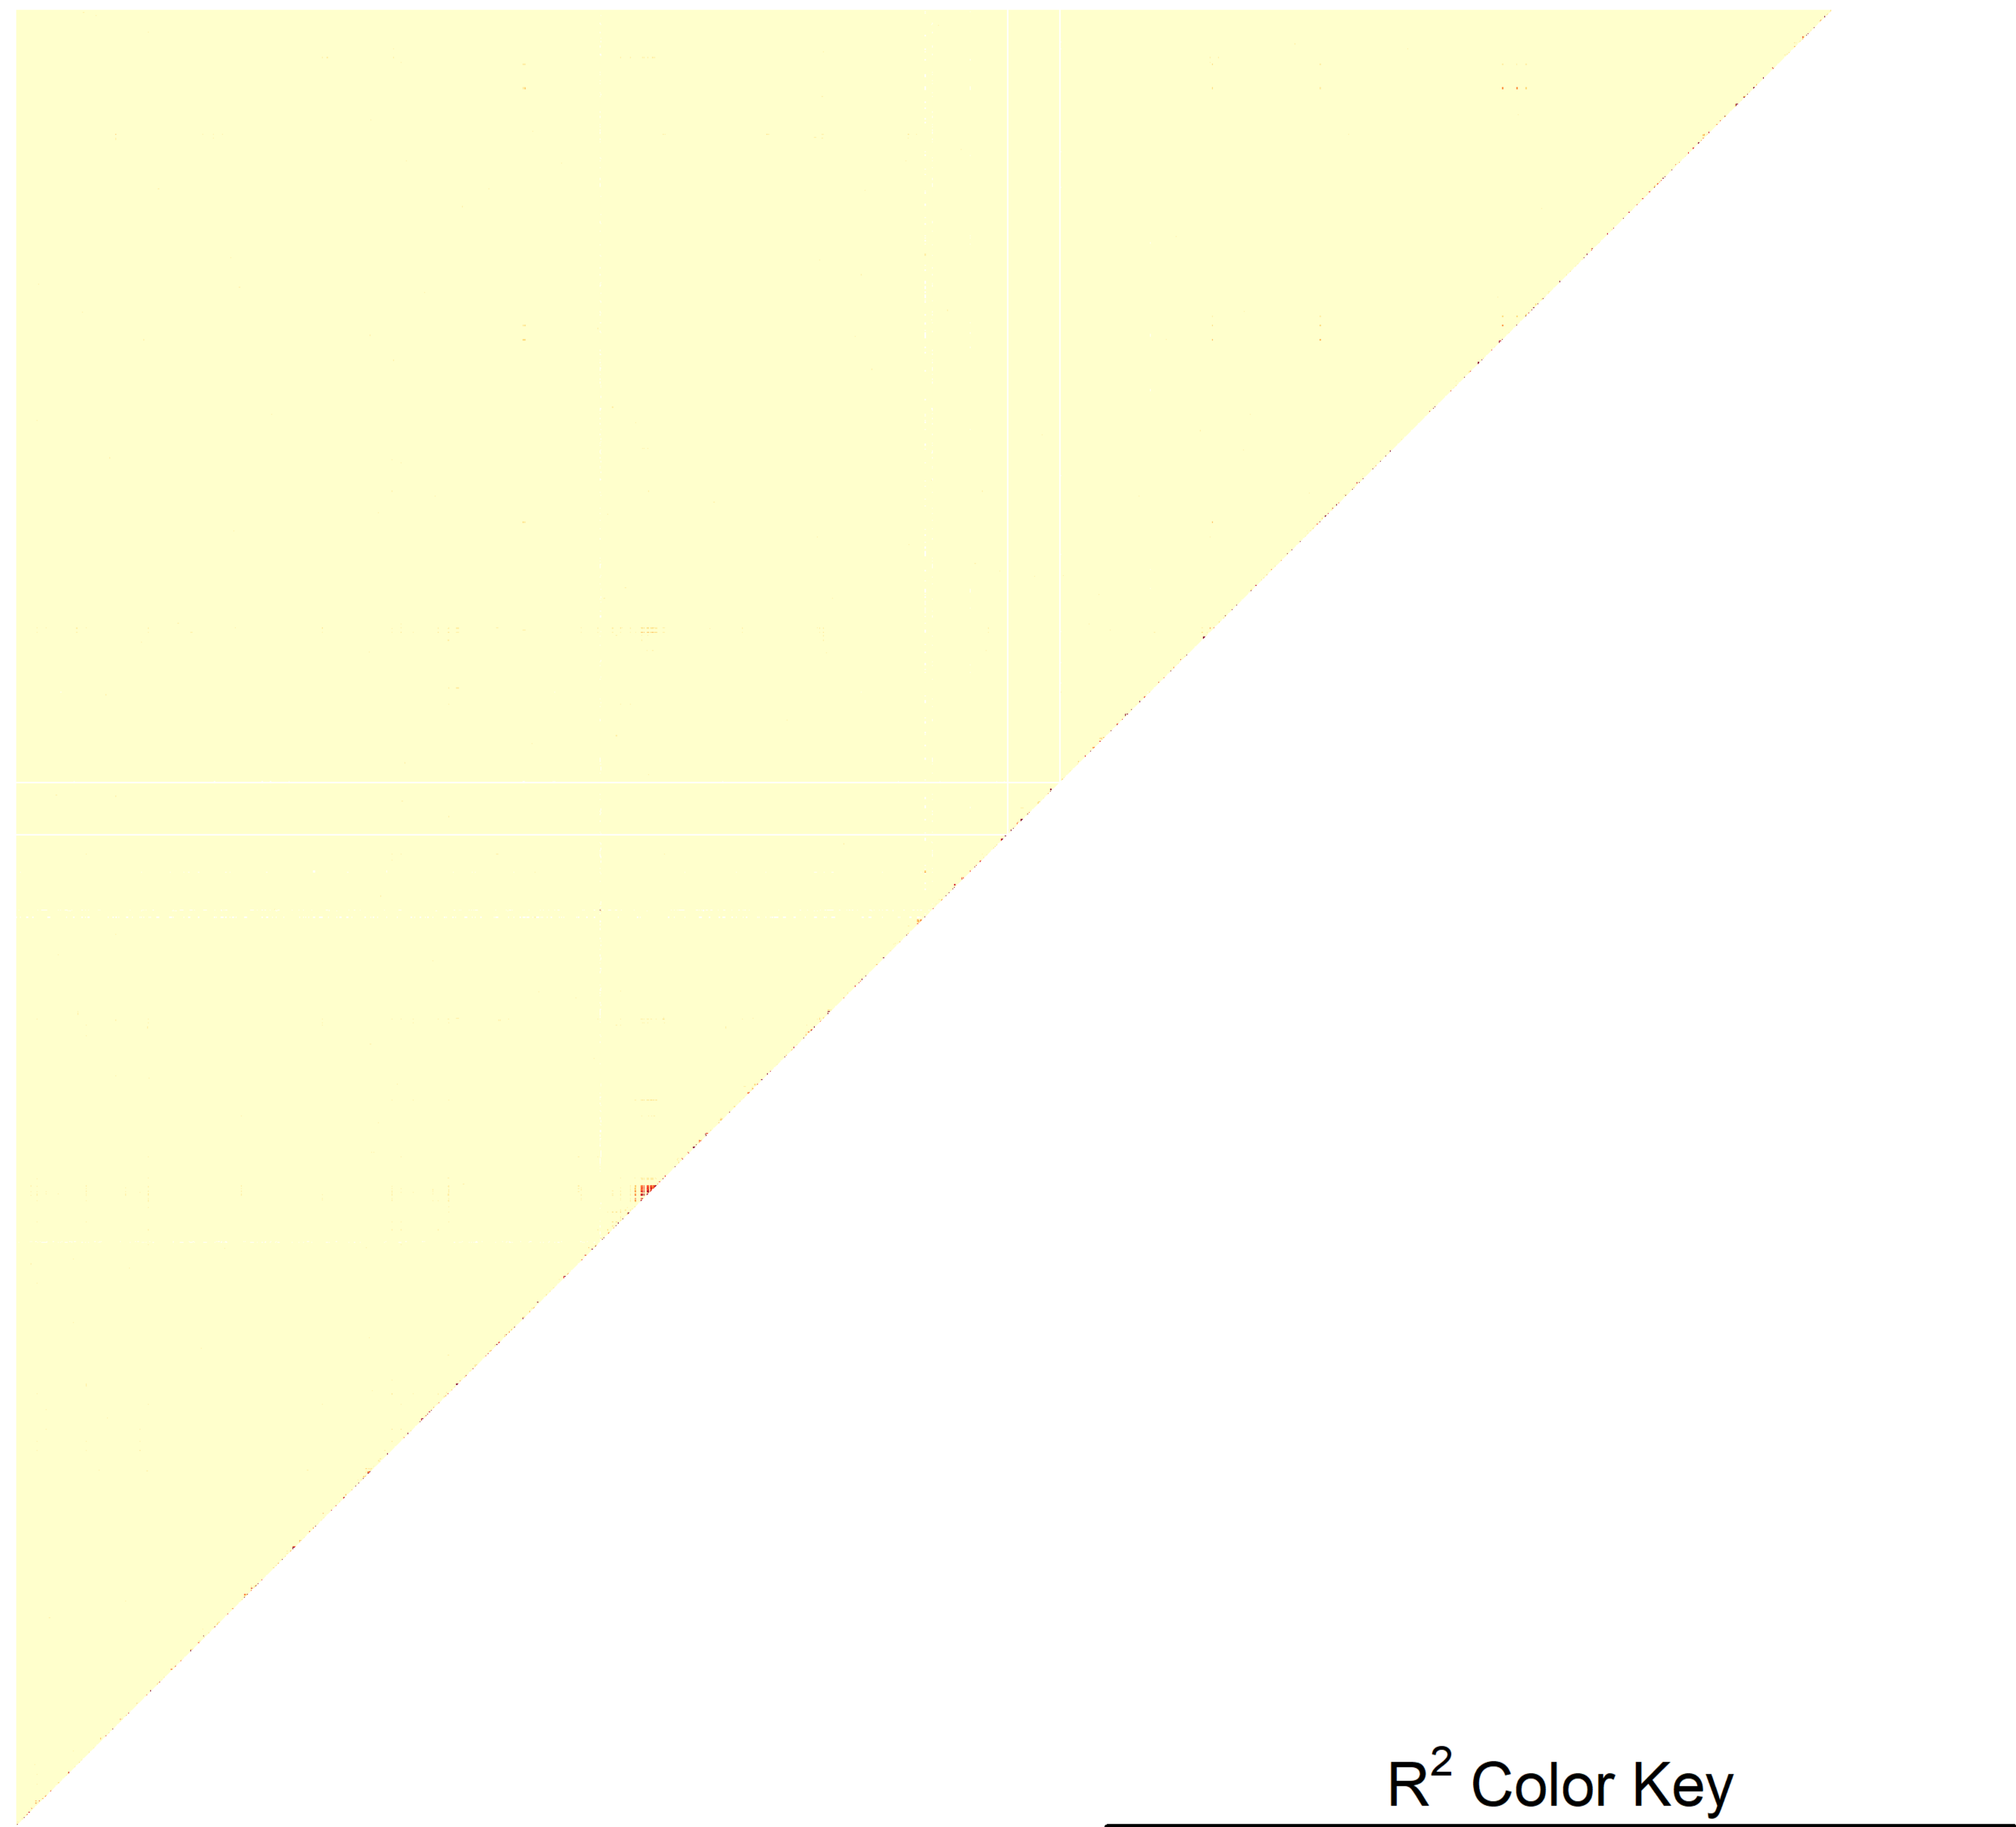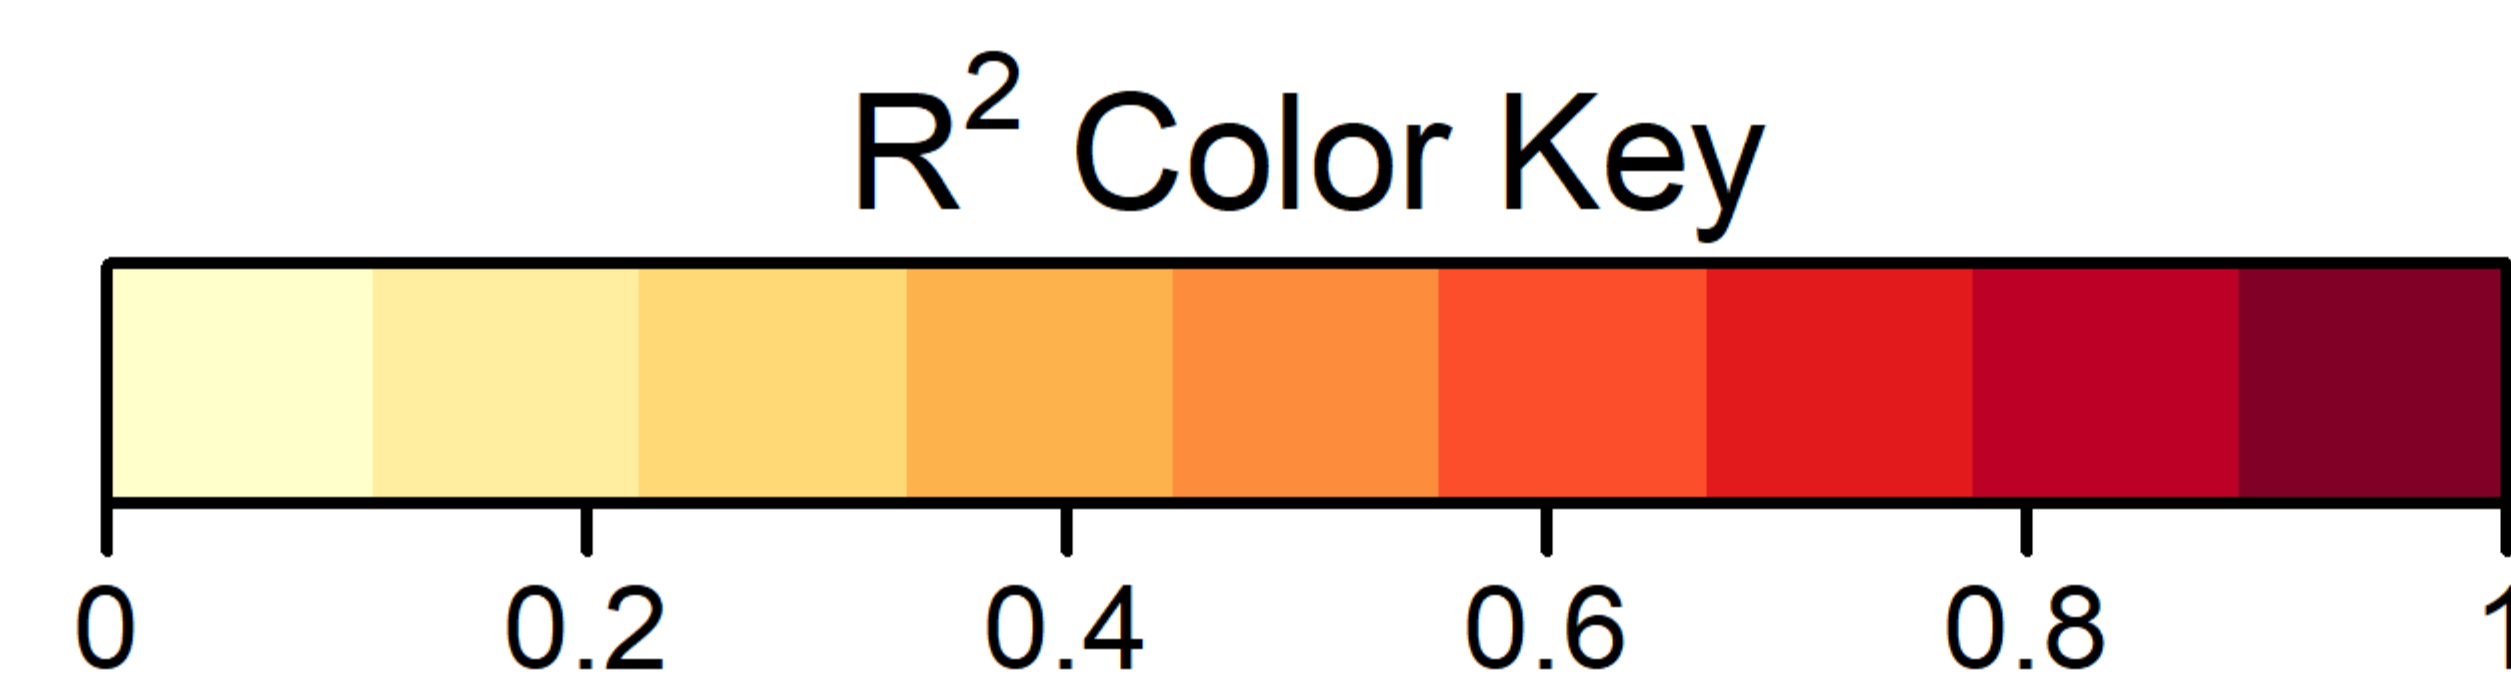

P. jacobaeus - Chromosome 14

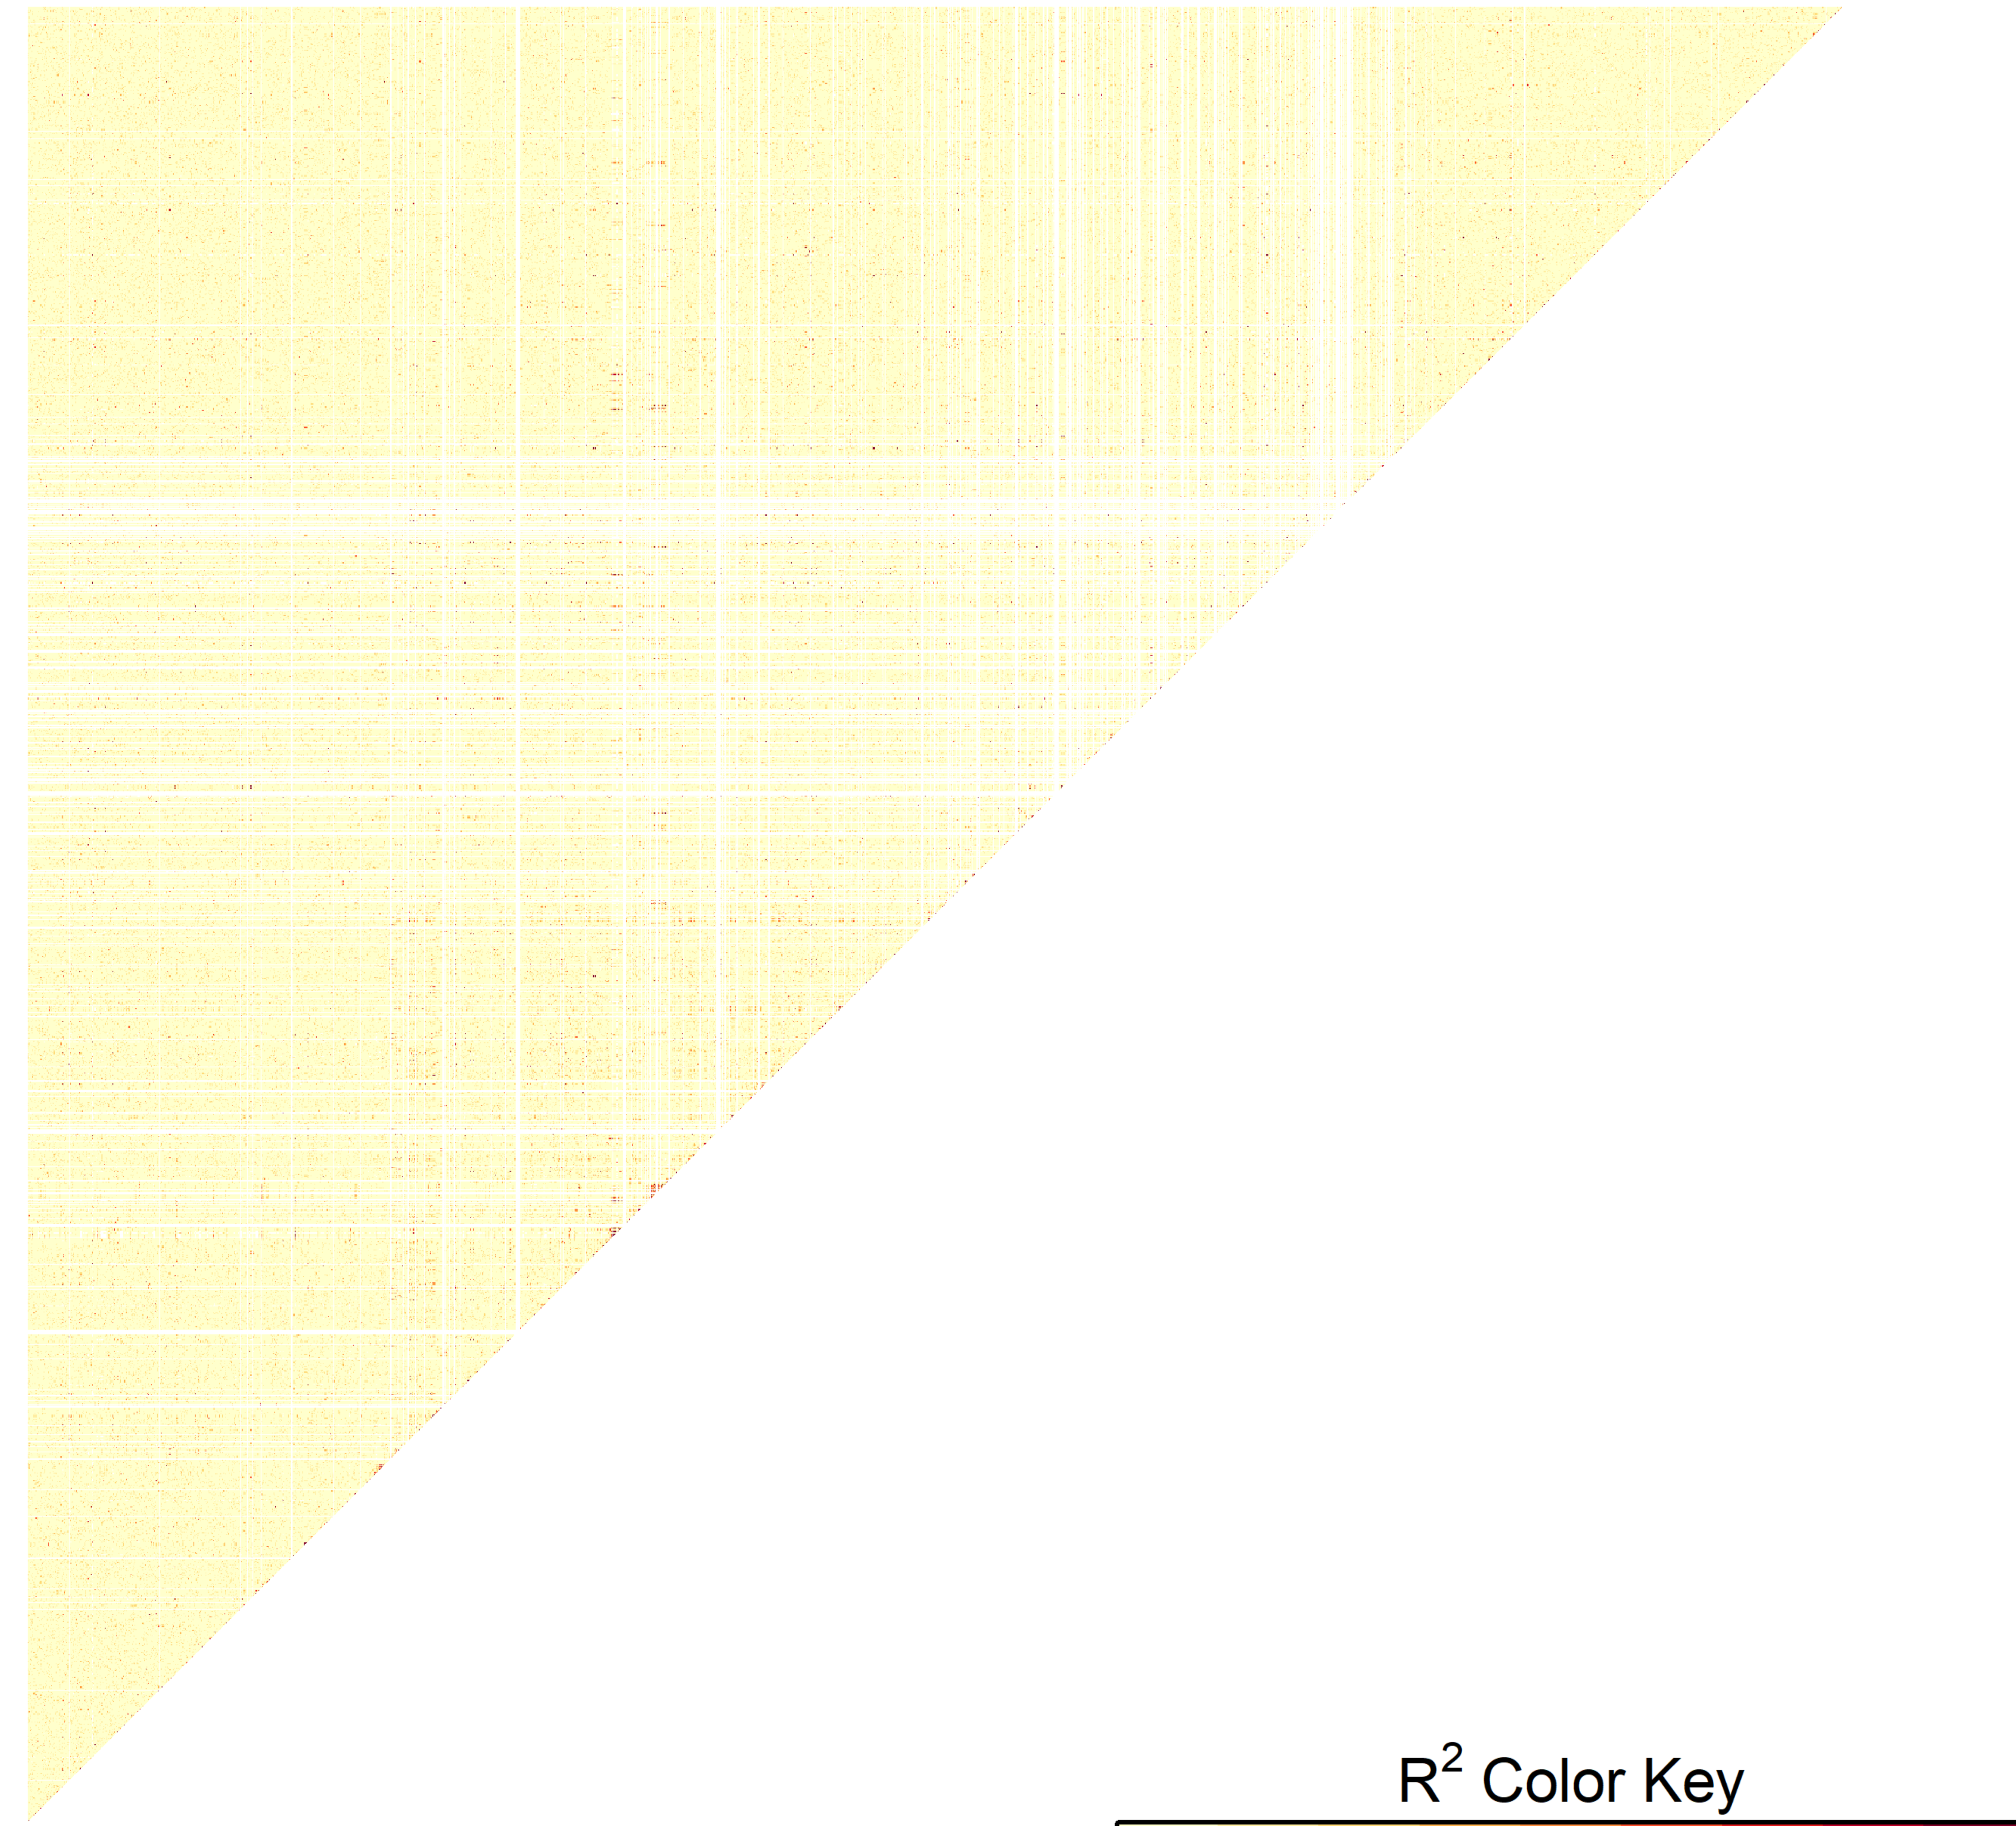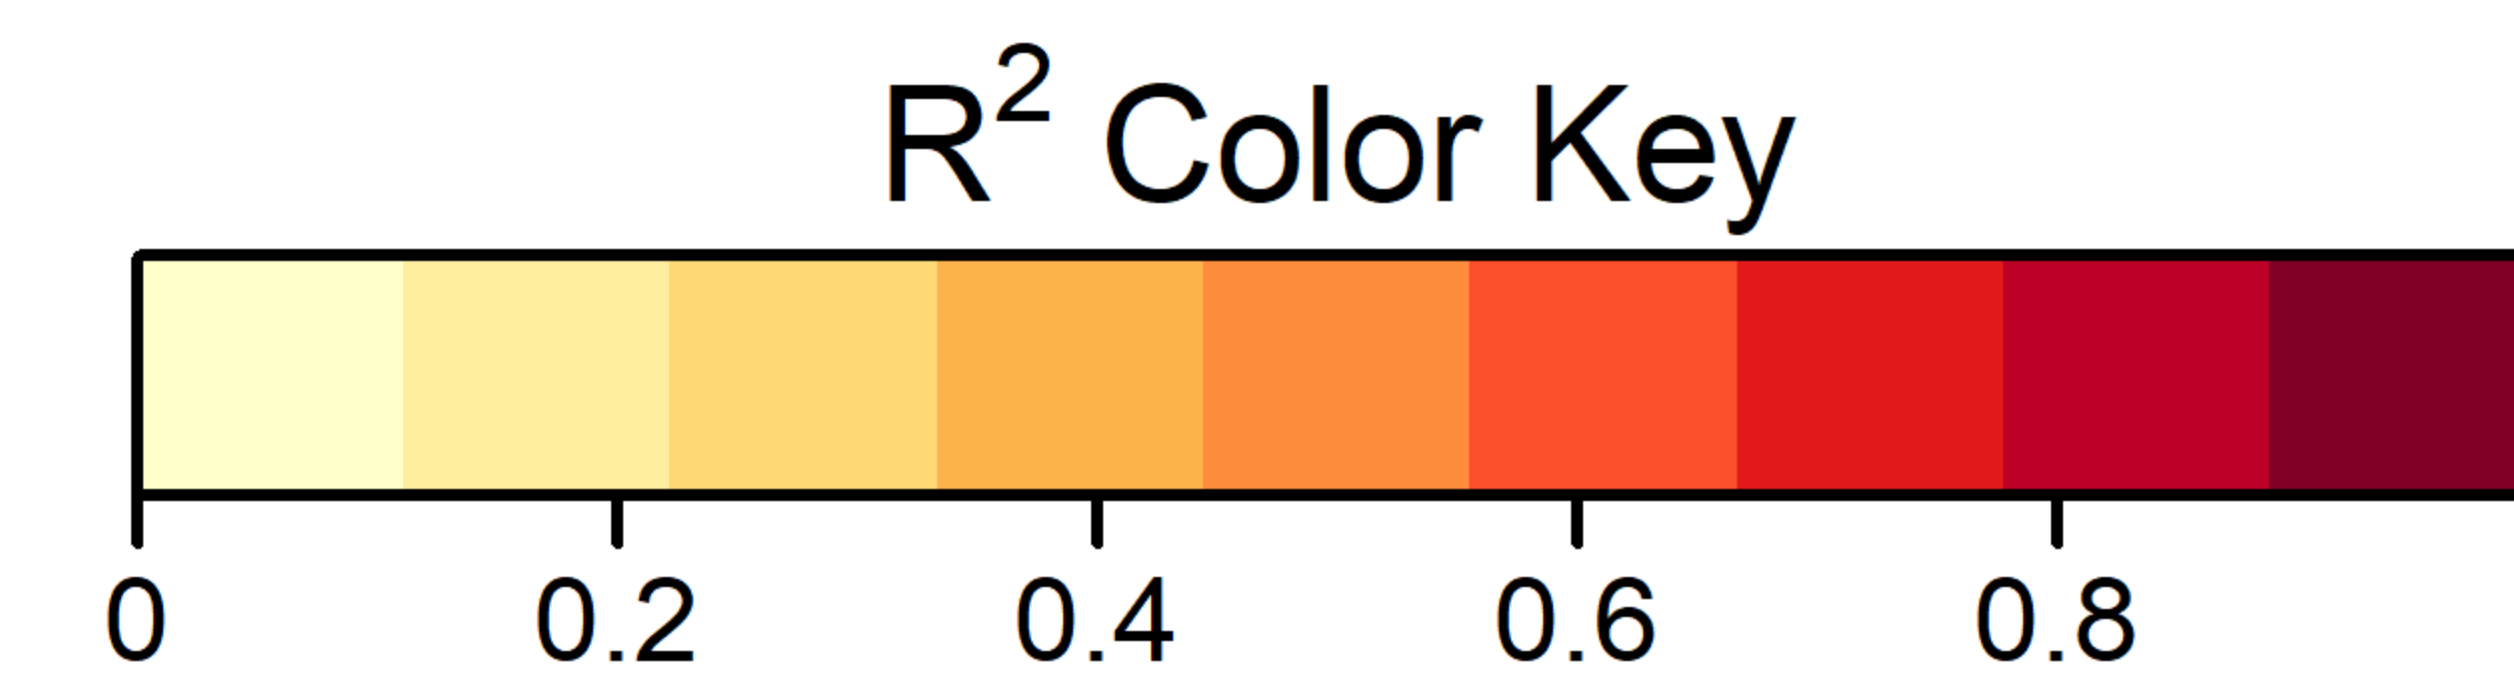



P. maximus - Chromosome 15

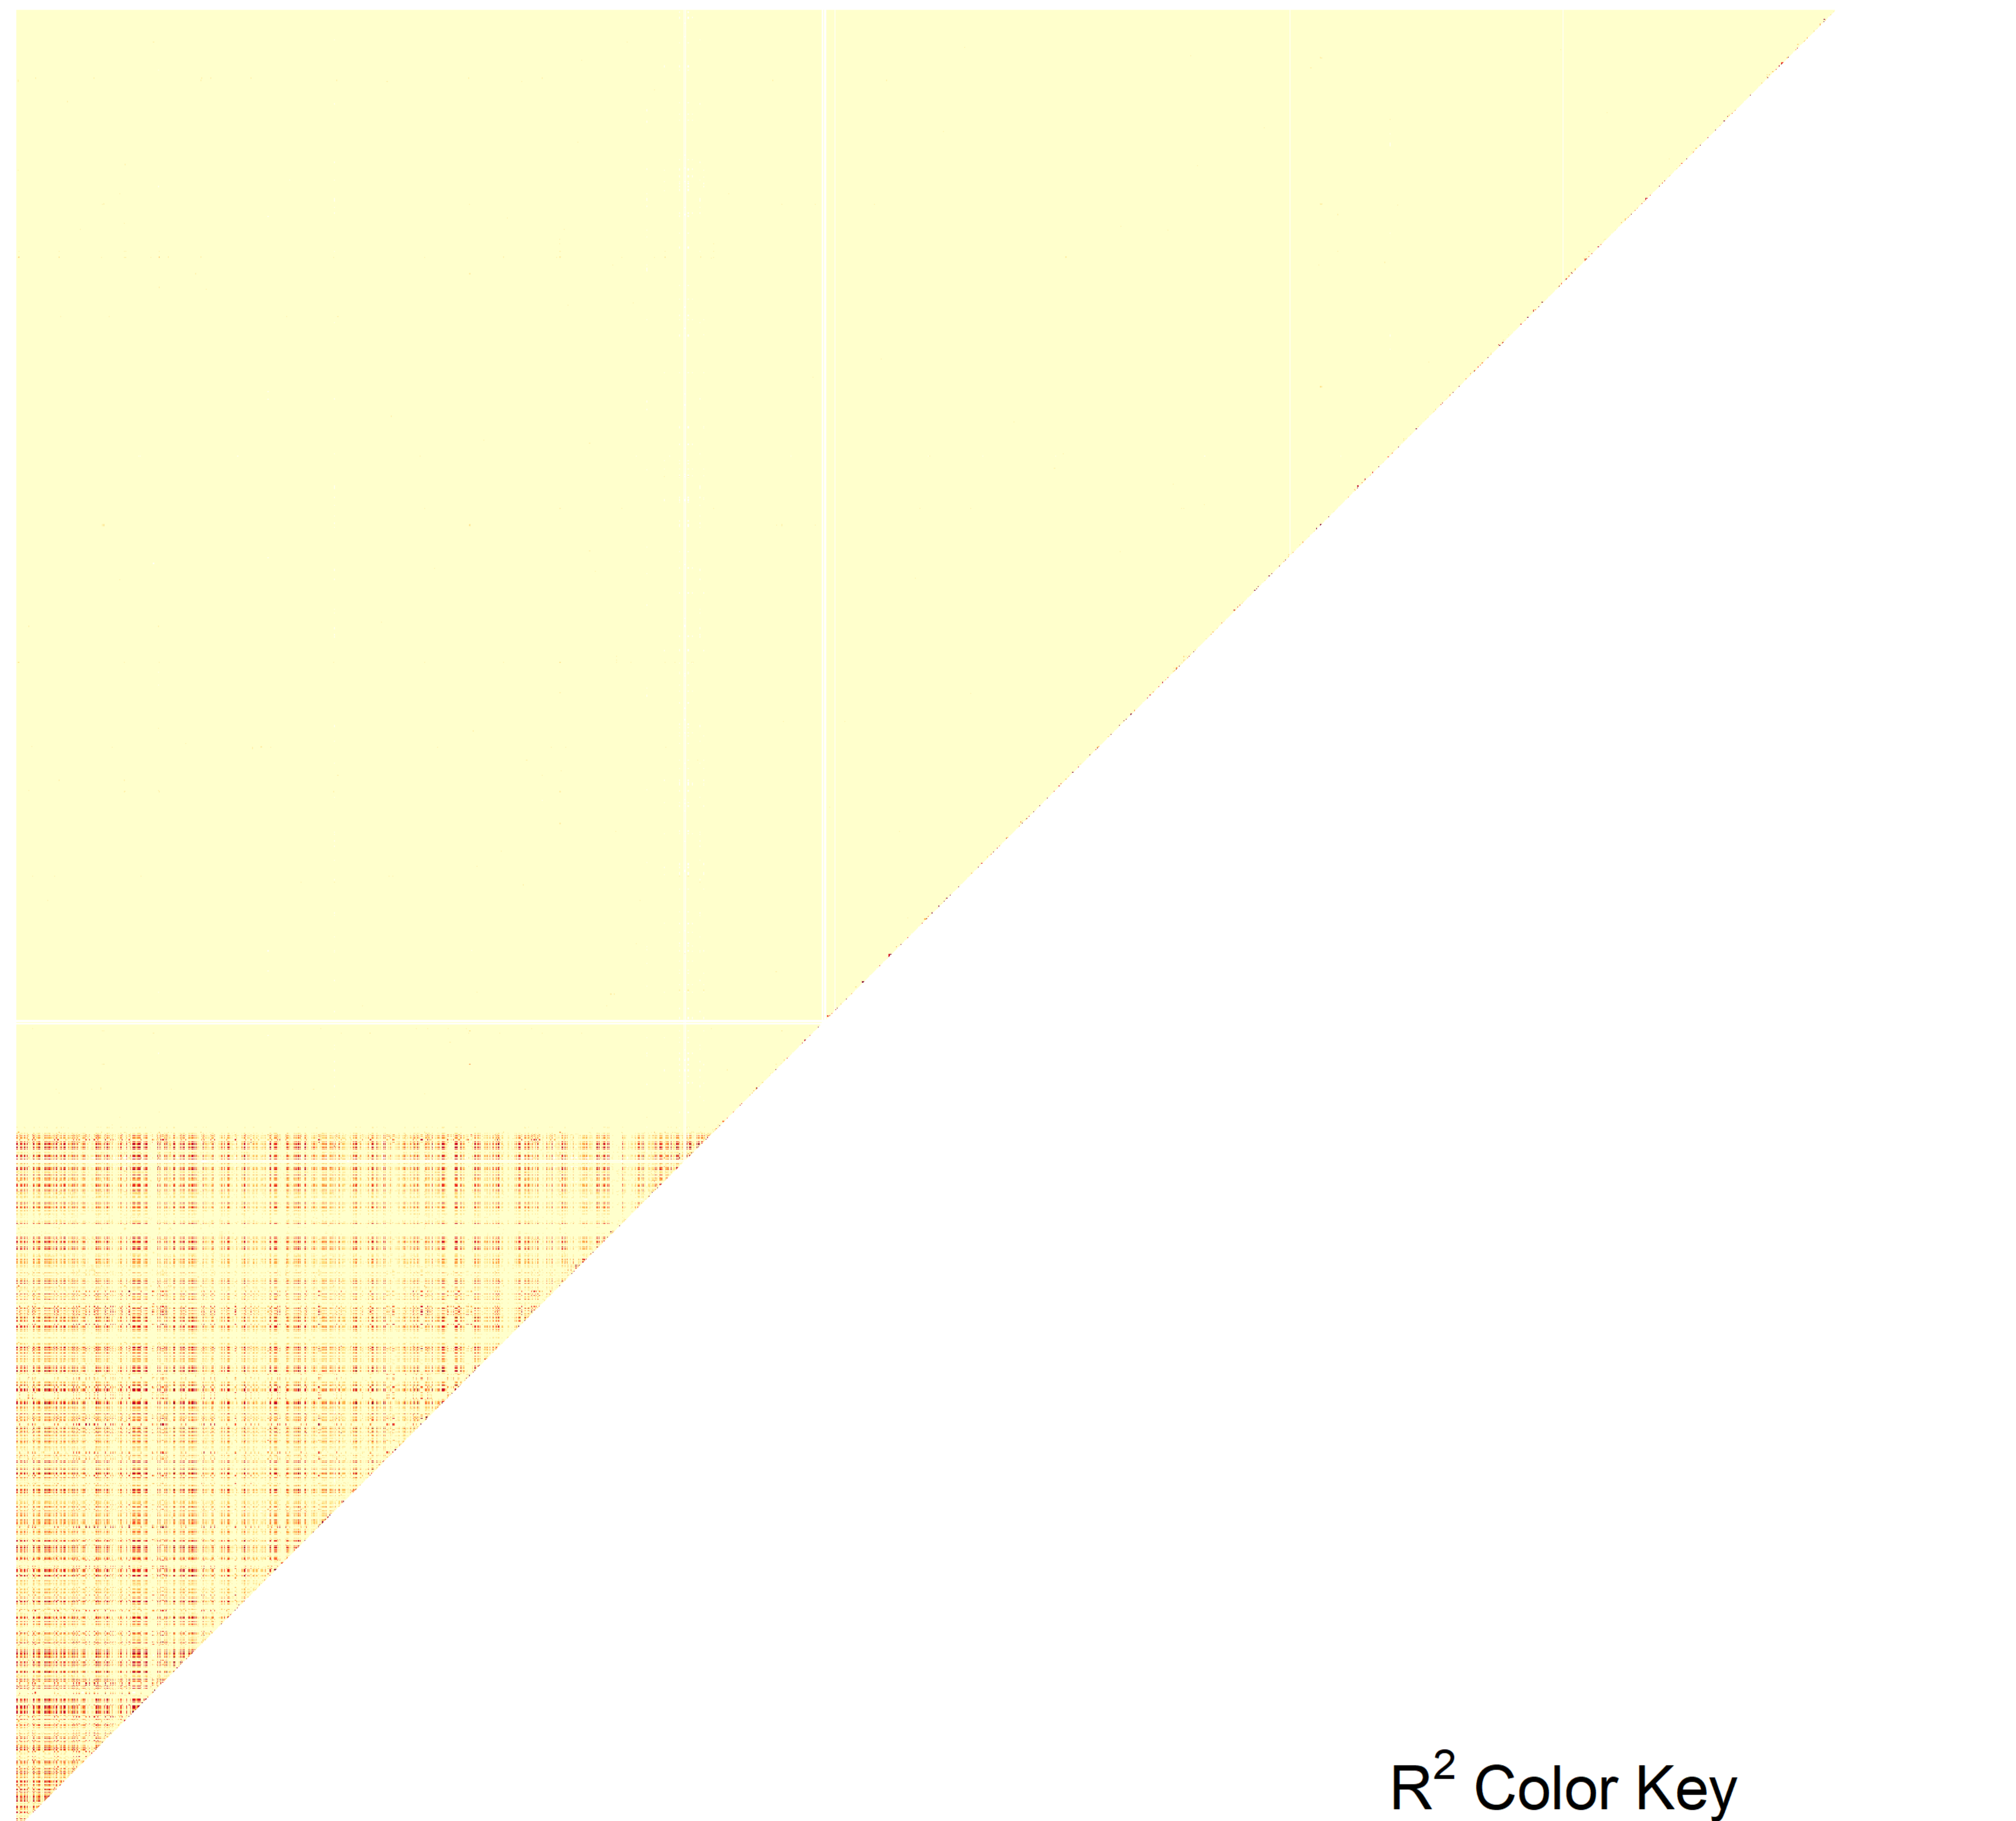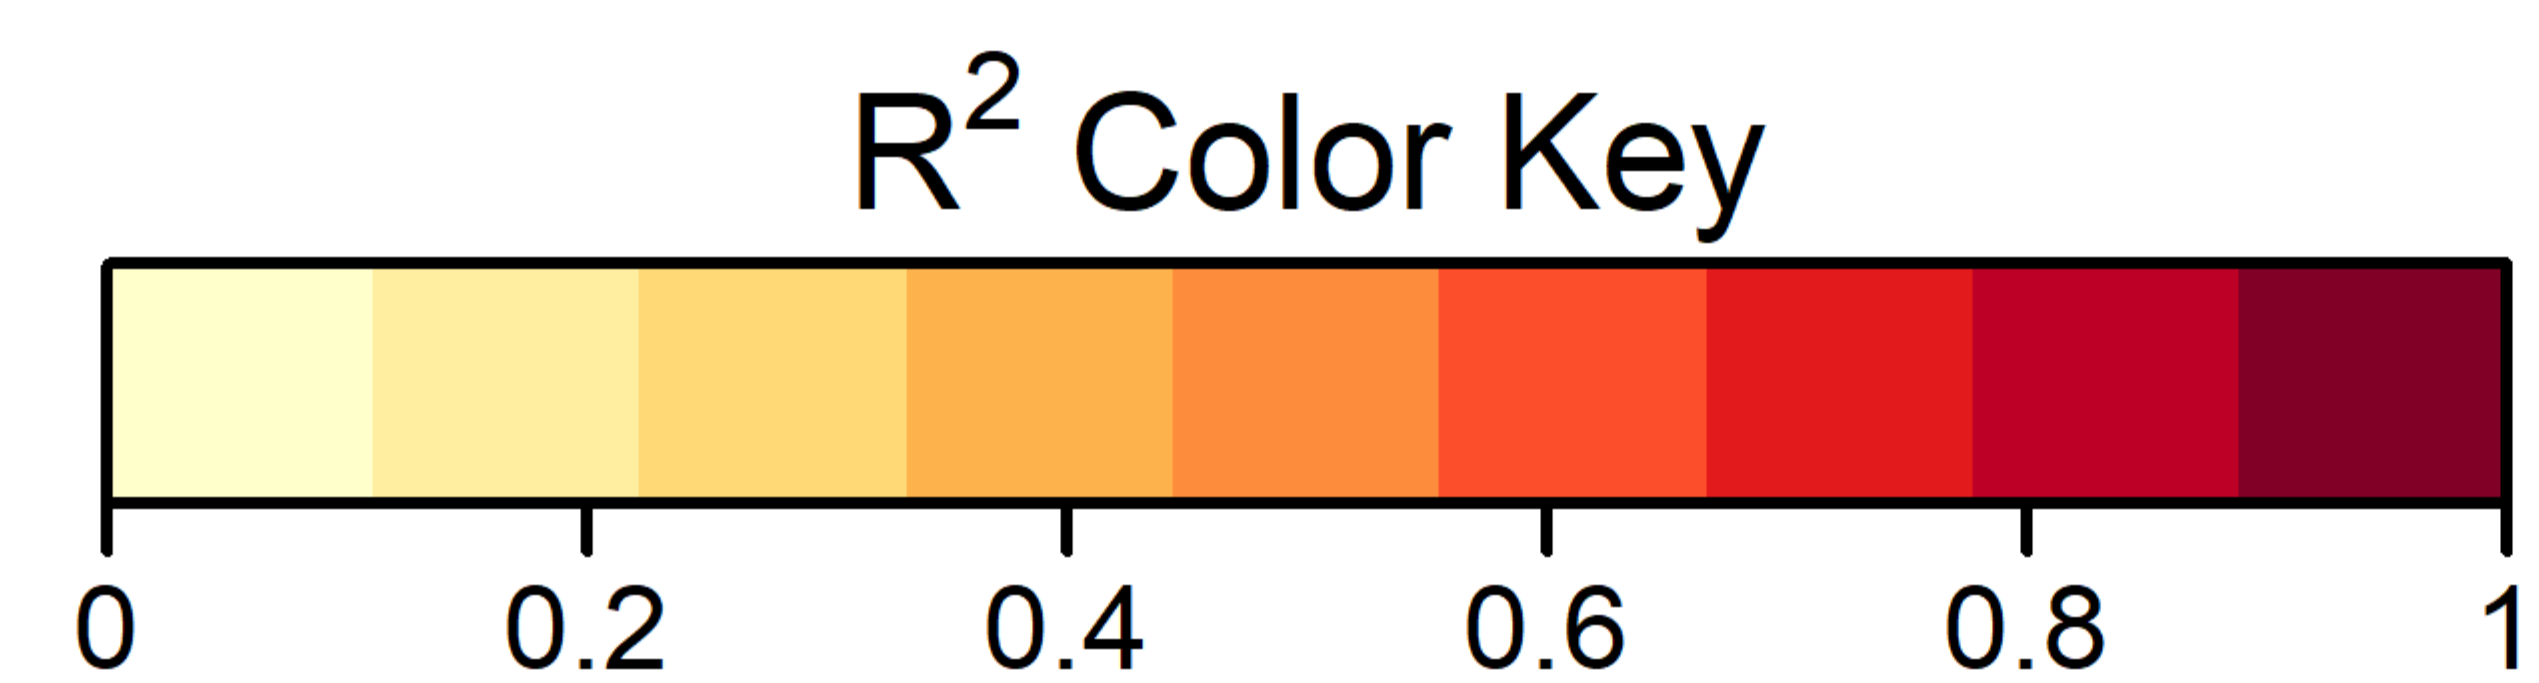

P. jacobaeus - Chromosome 15

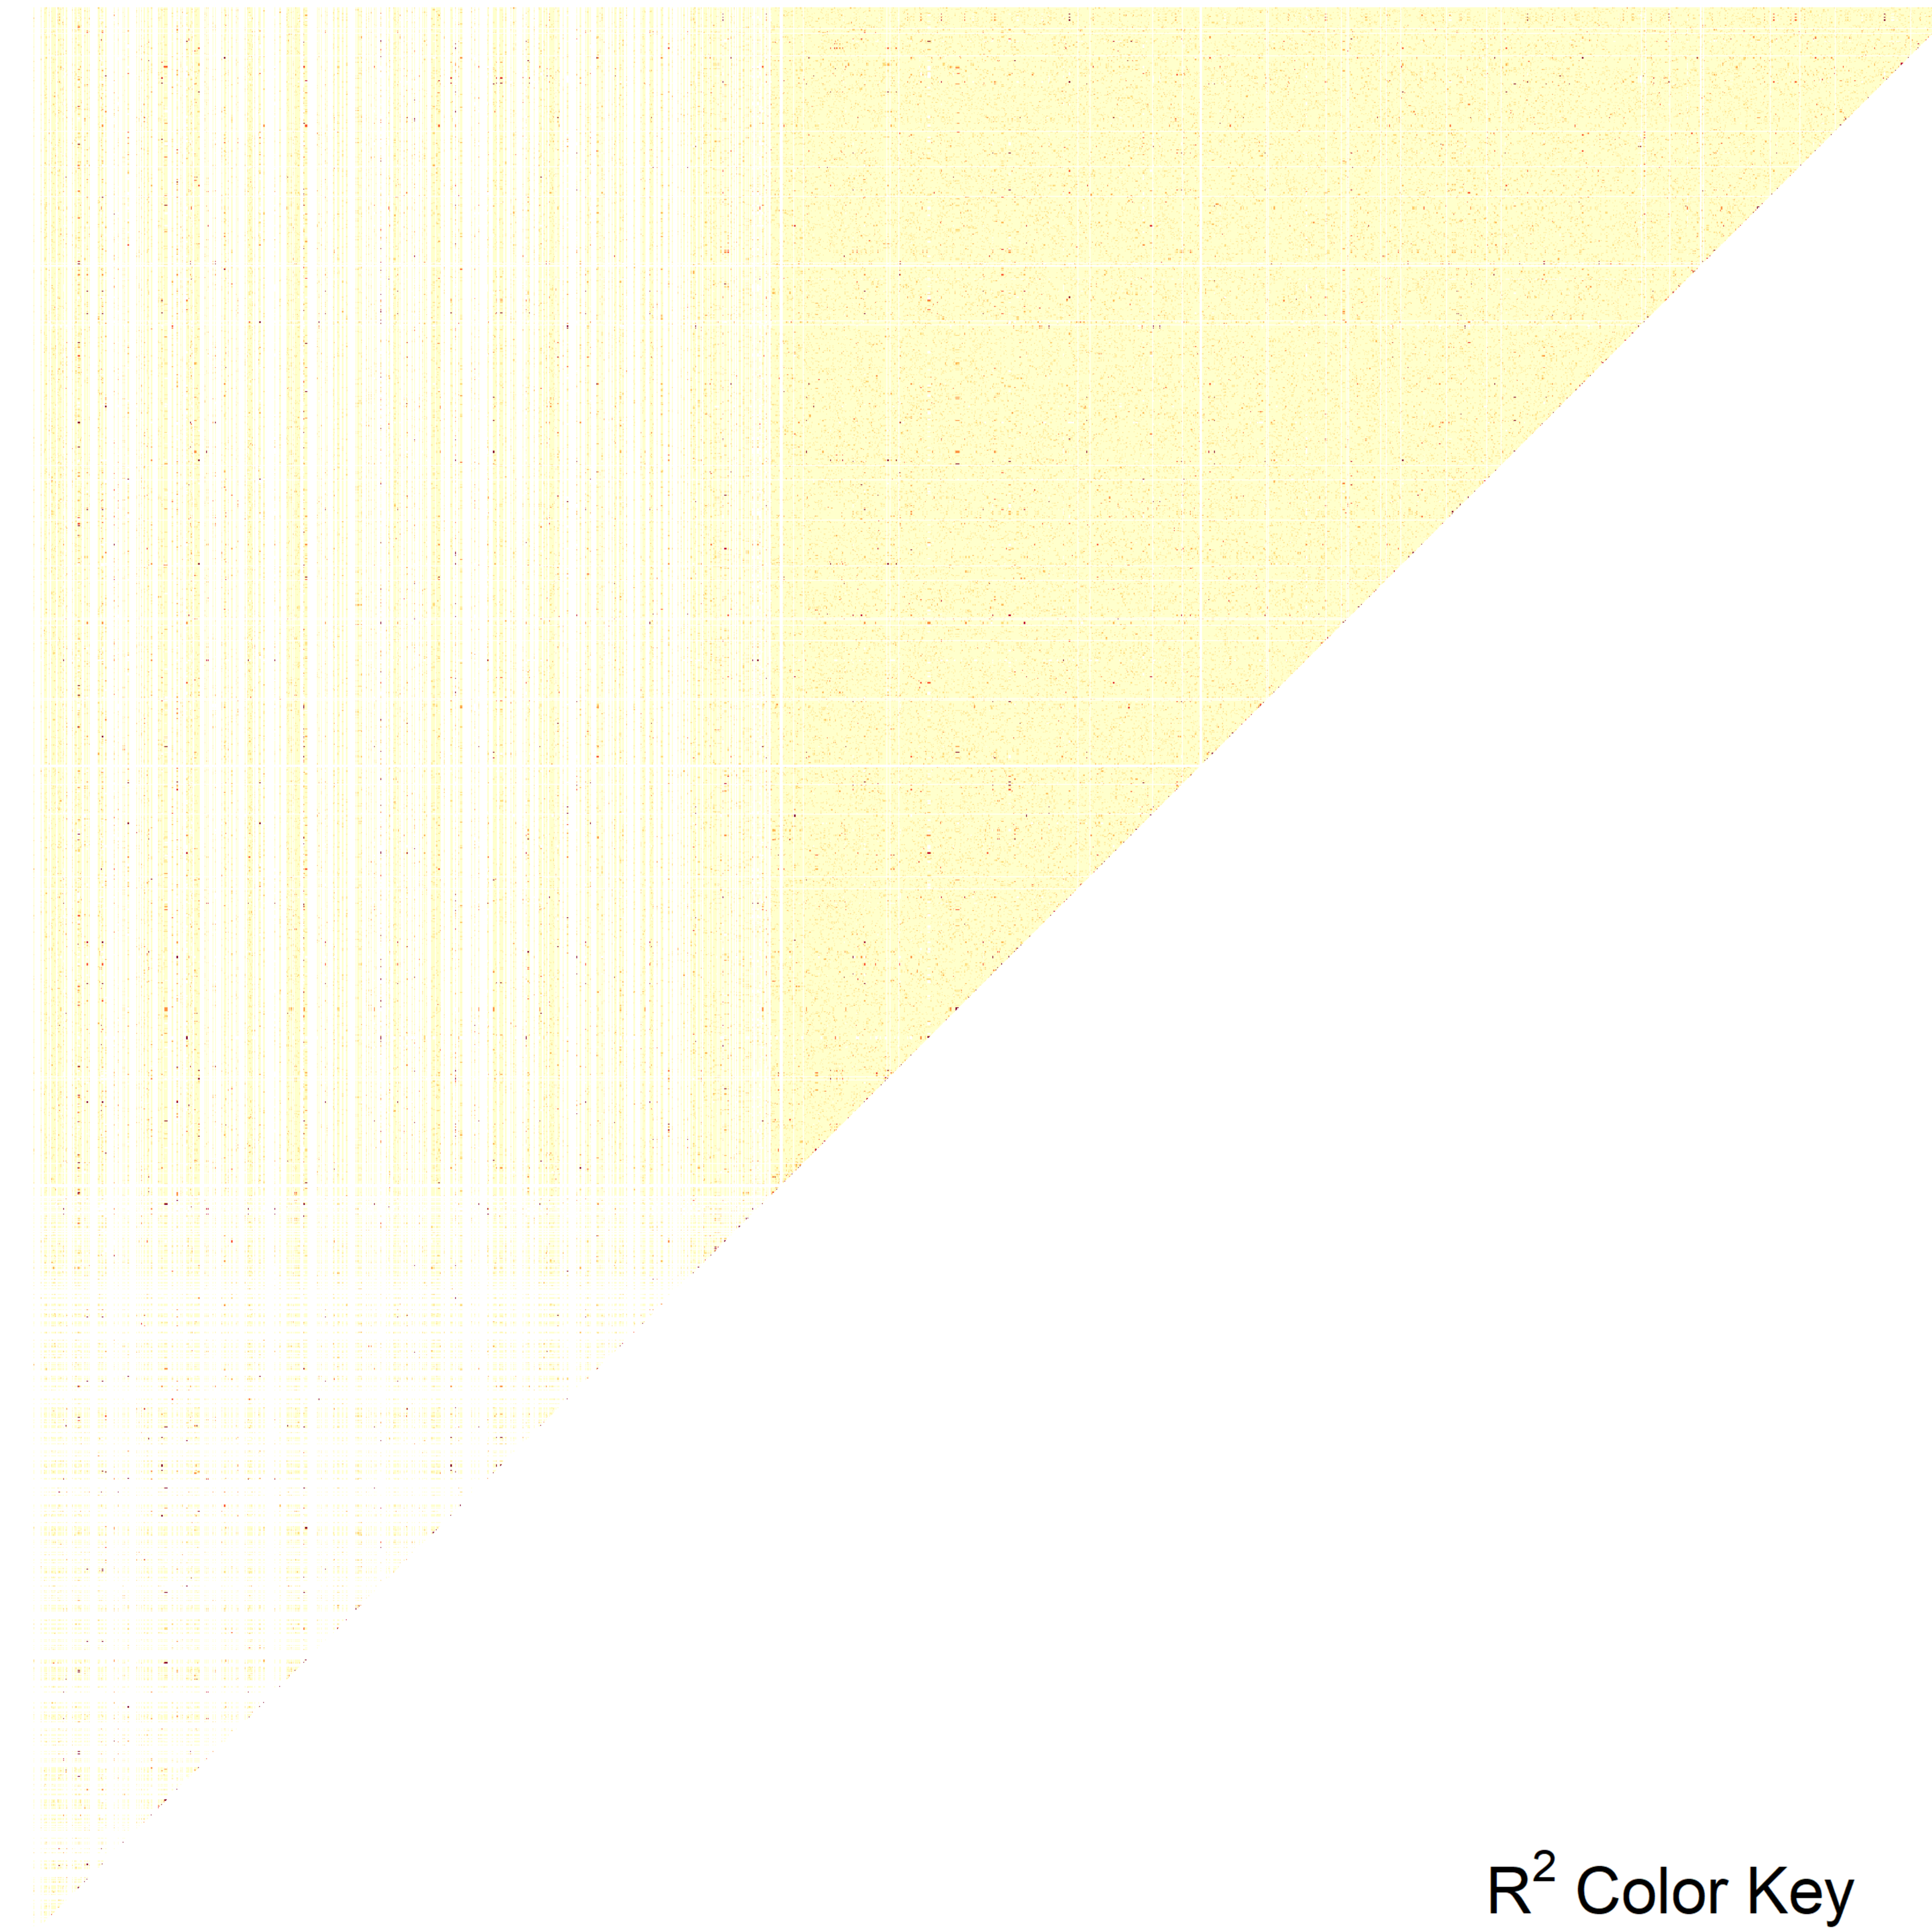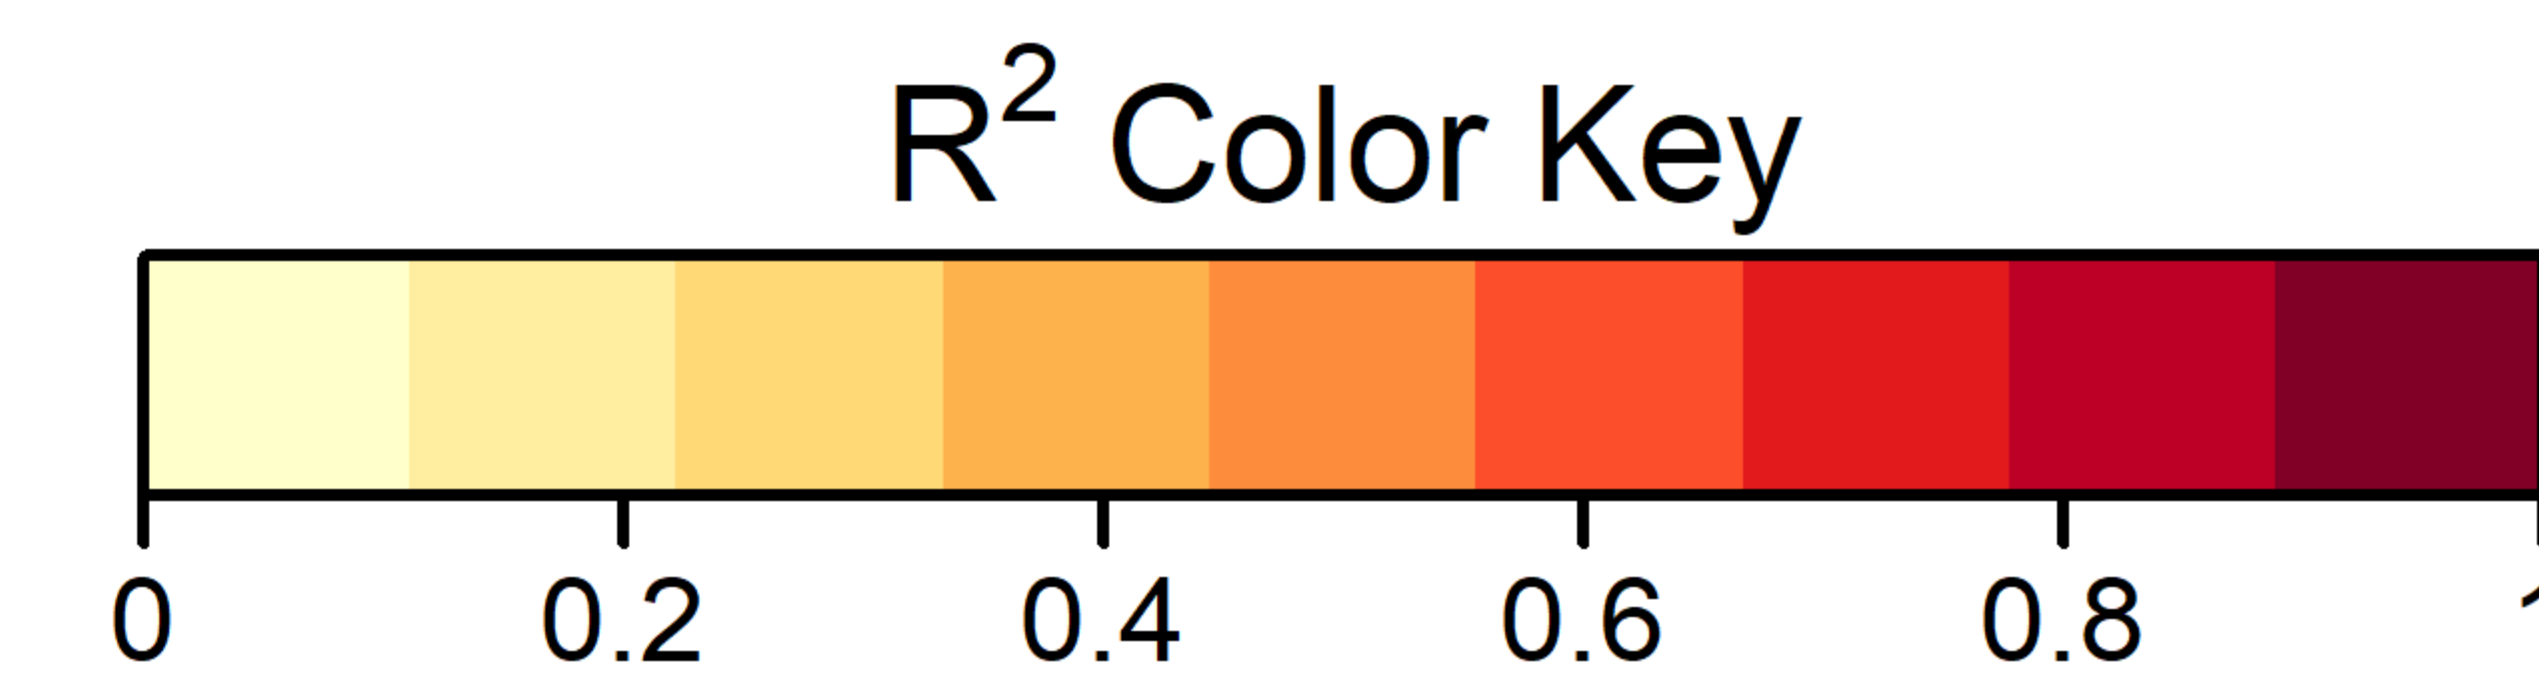



P. maximus - Chromosome 16

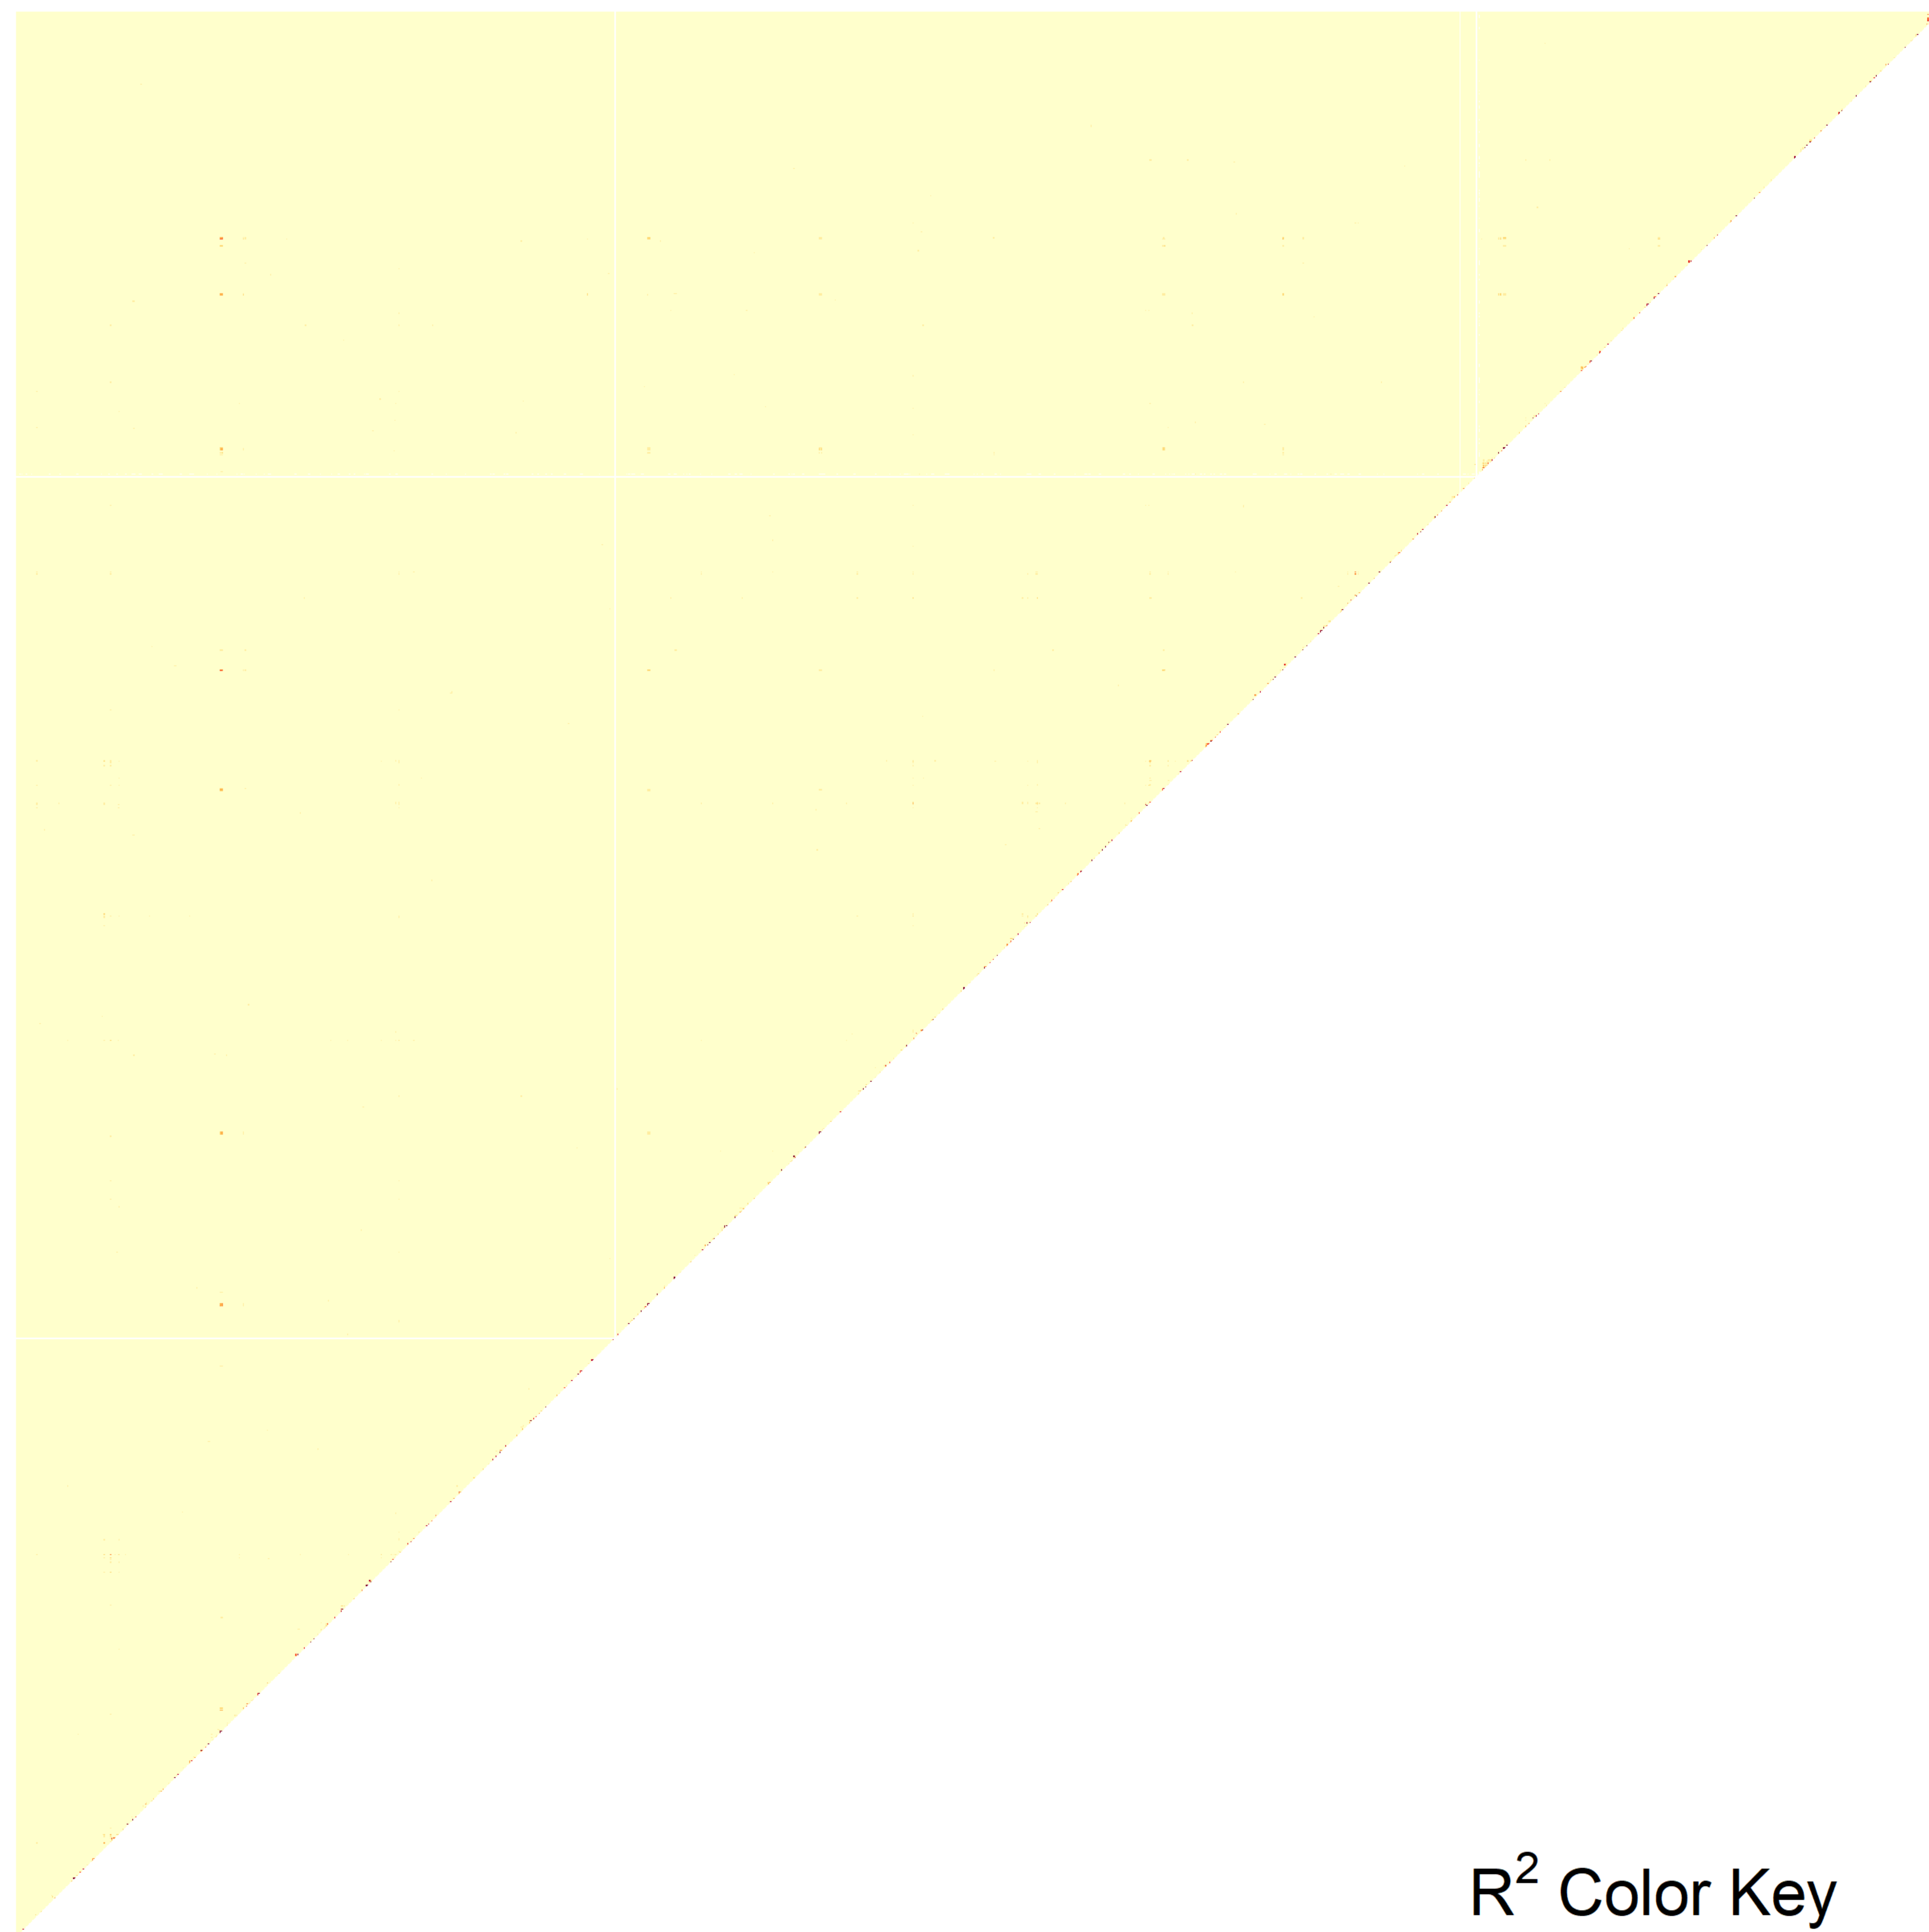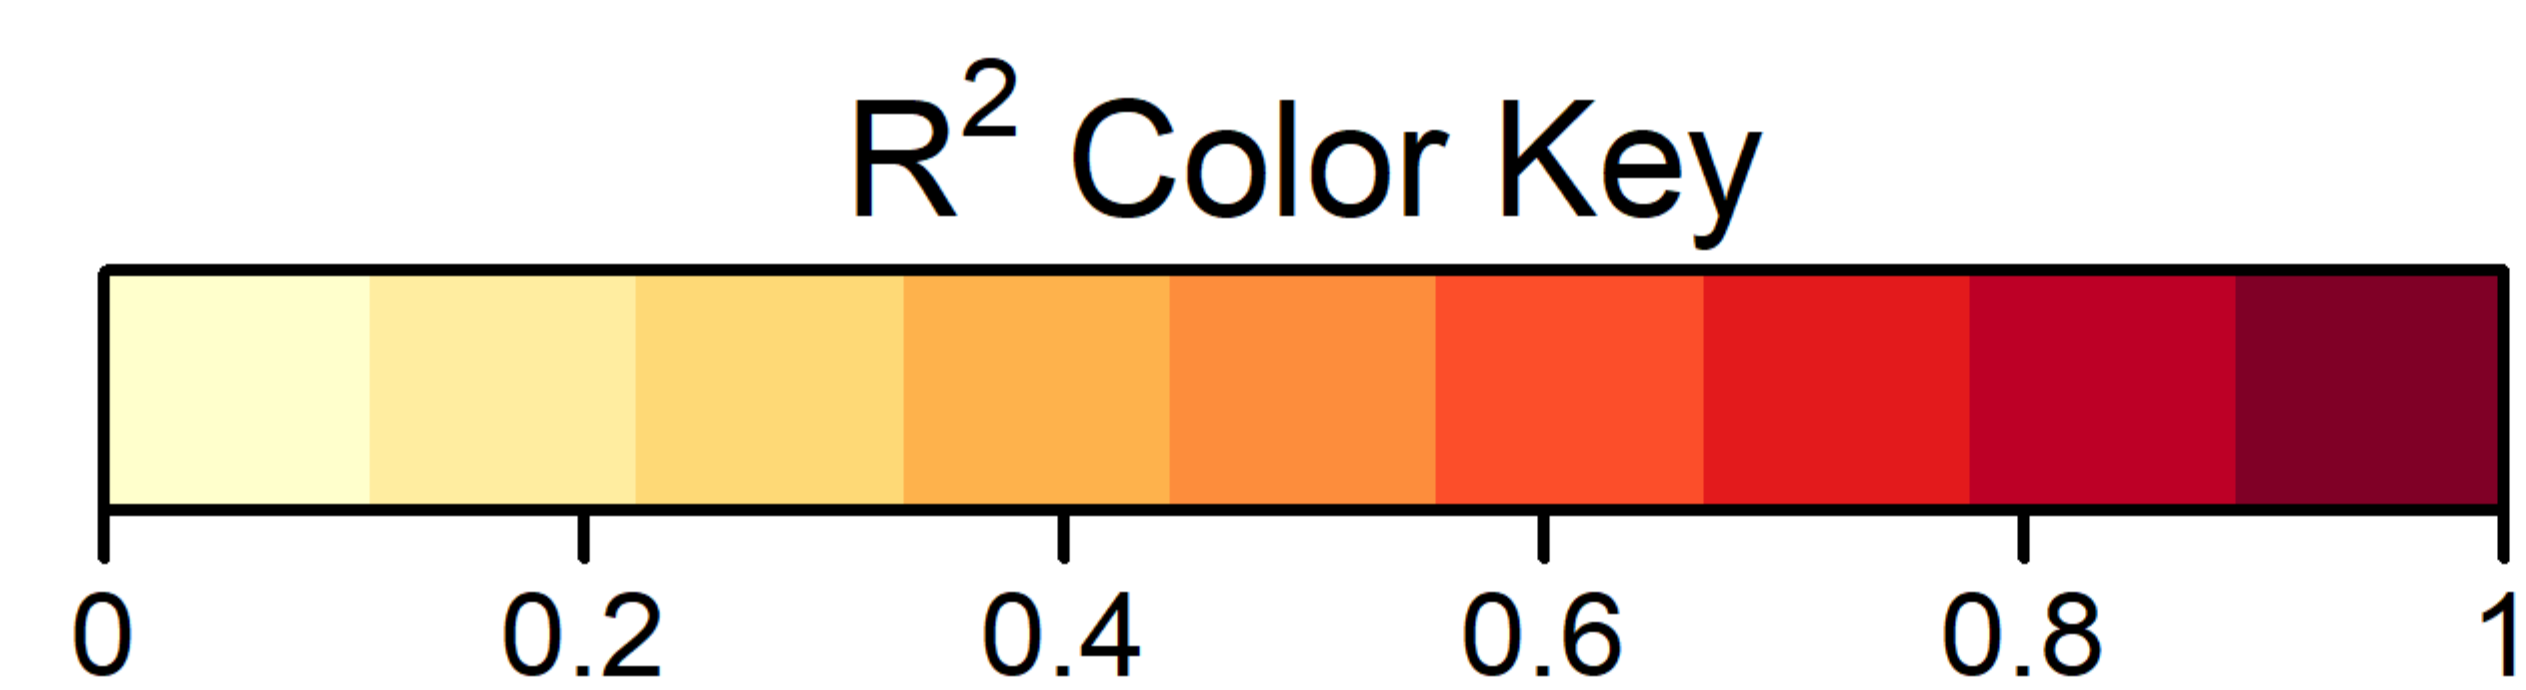

P. jacobaeus - Chromosome 16

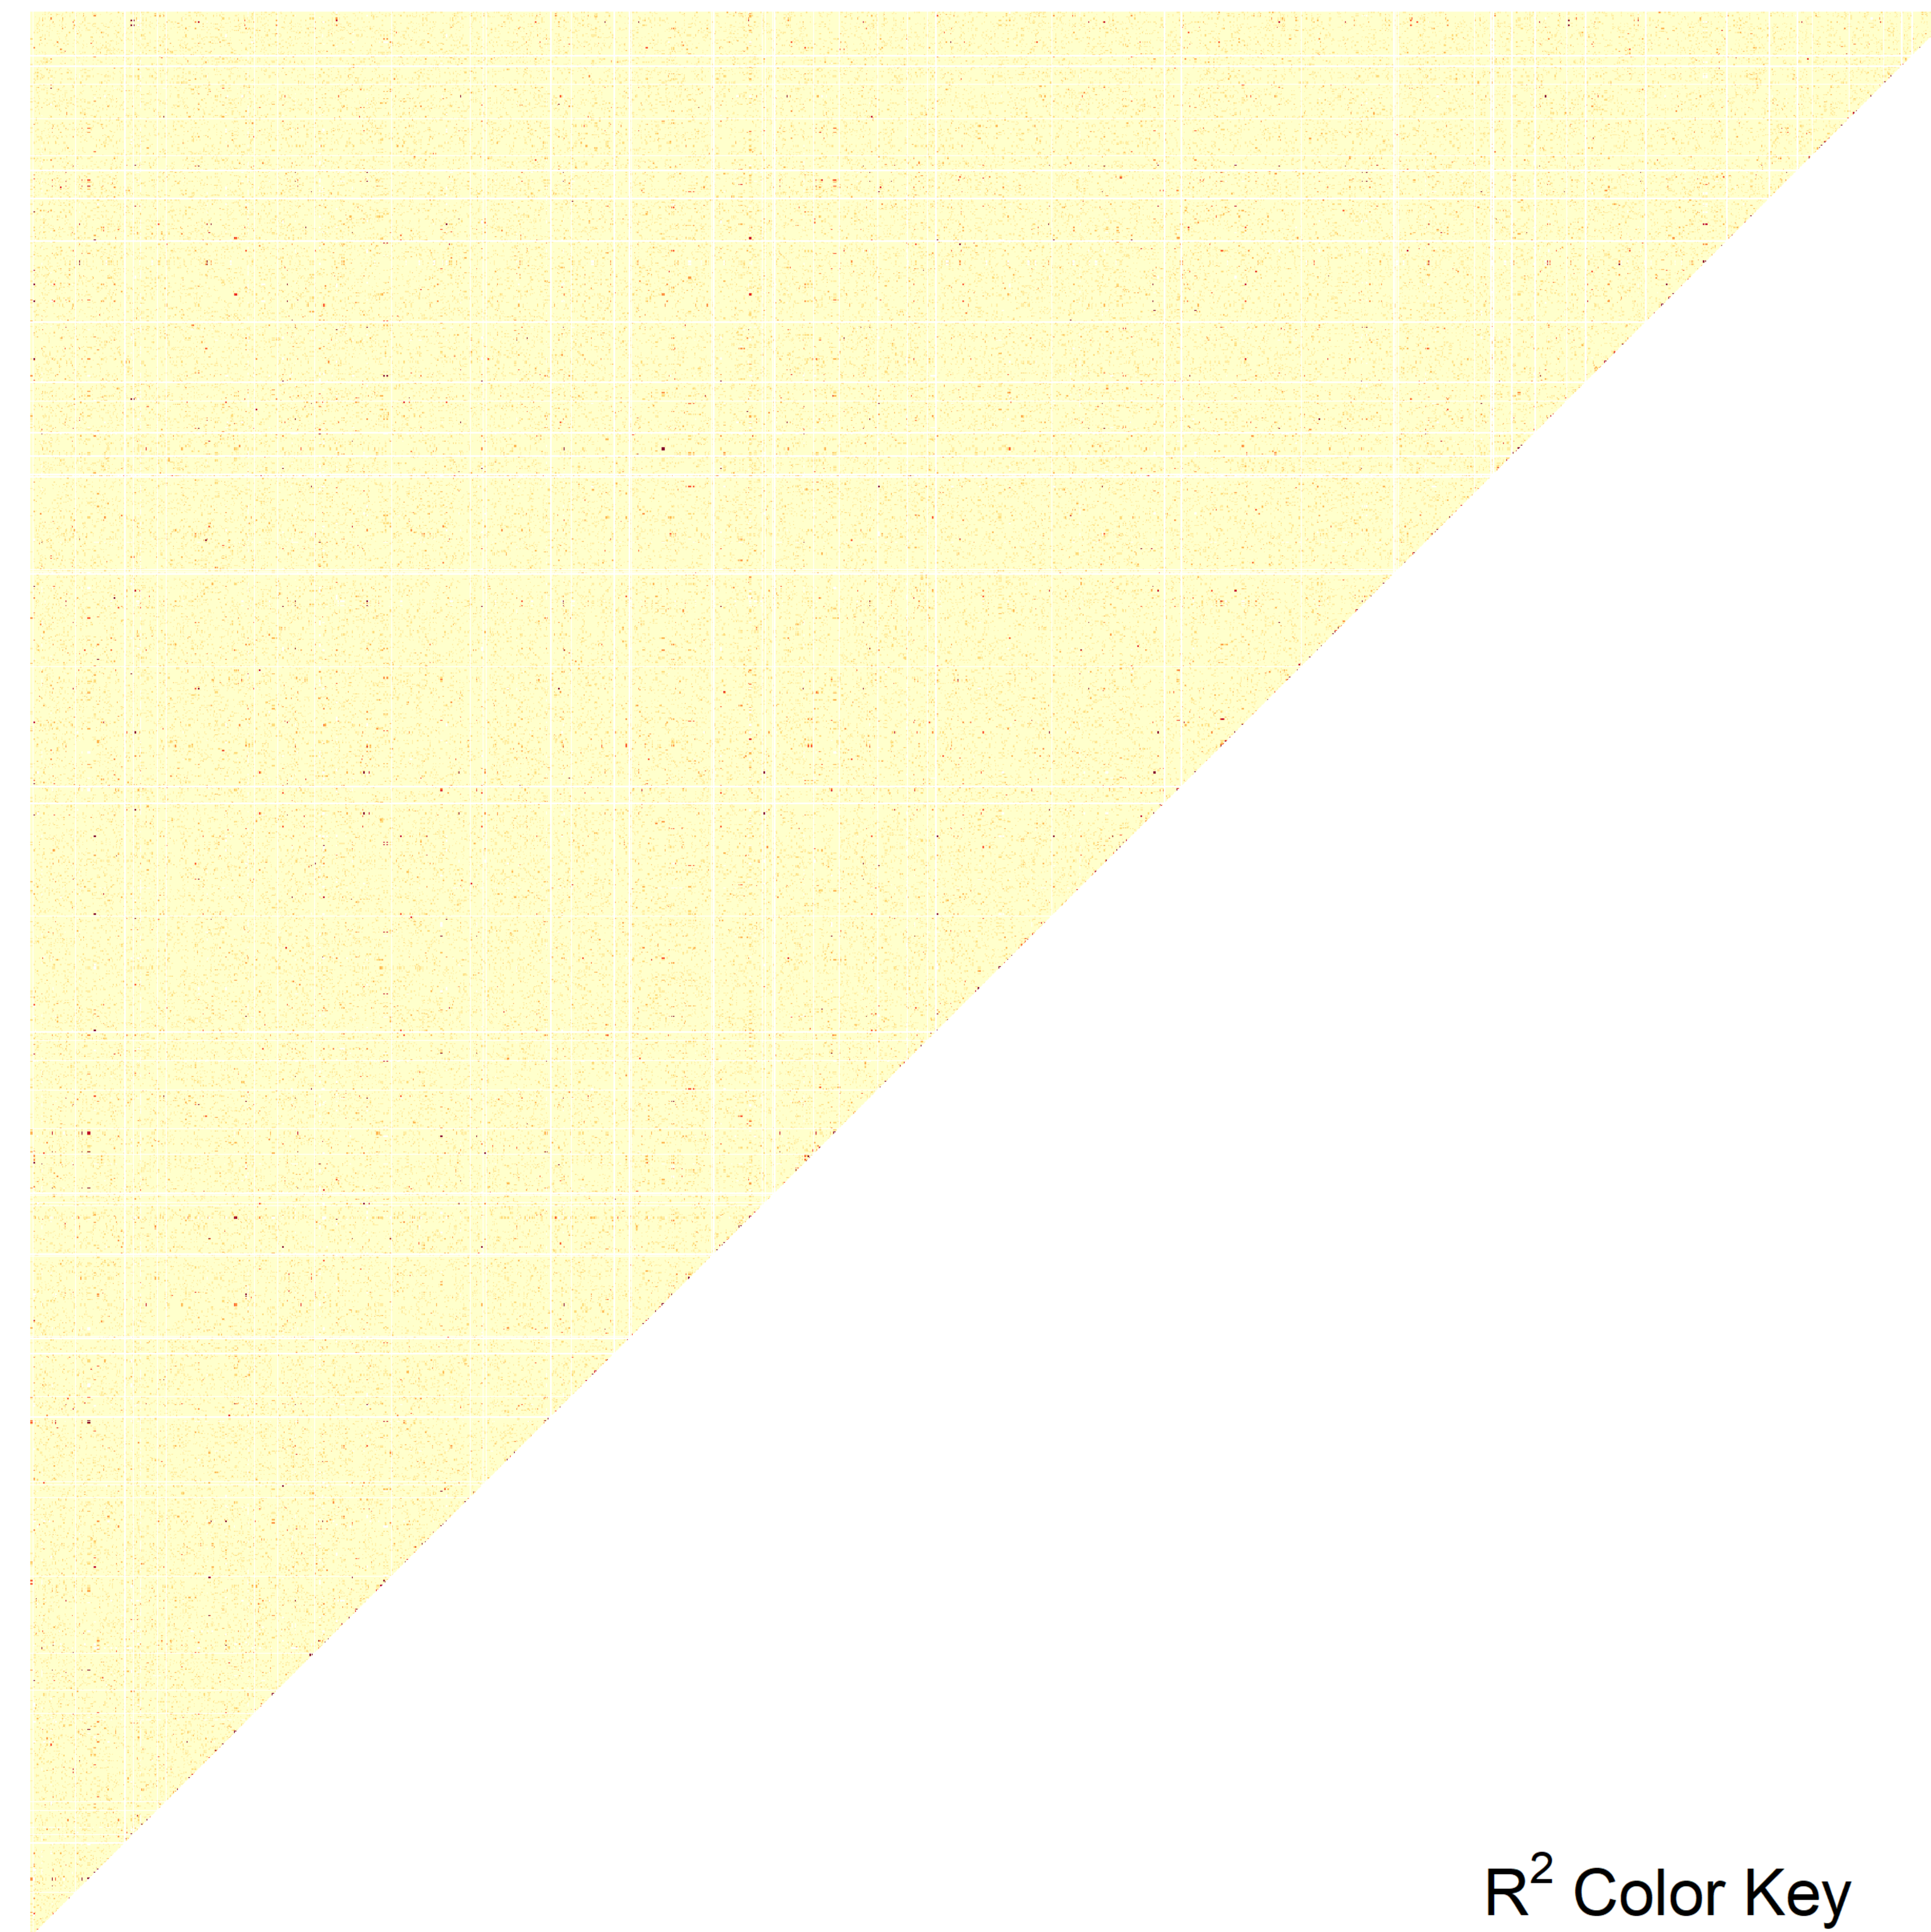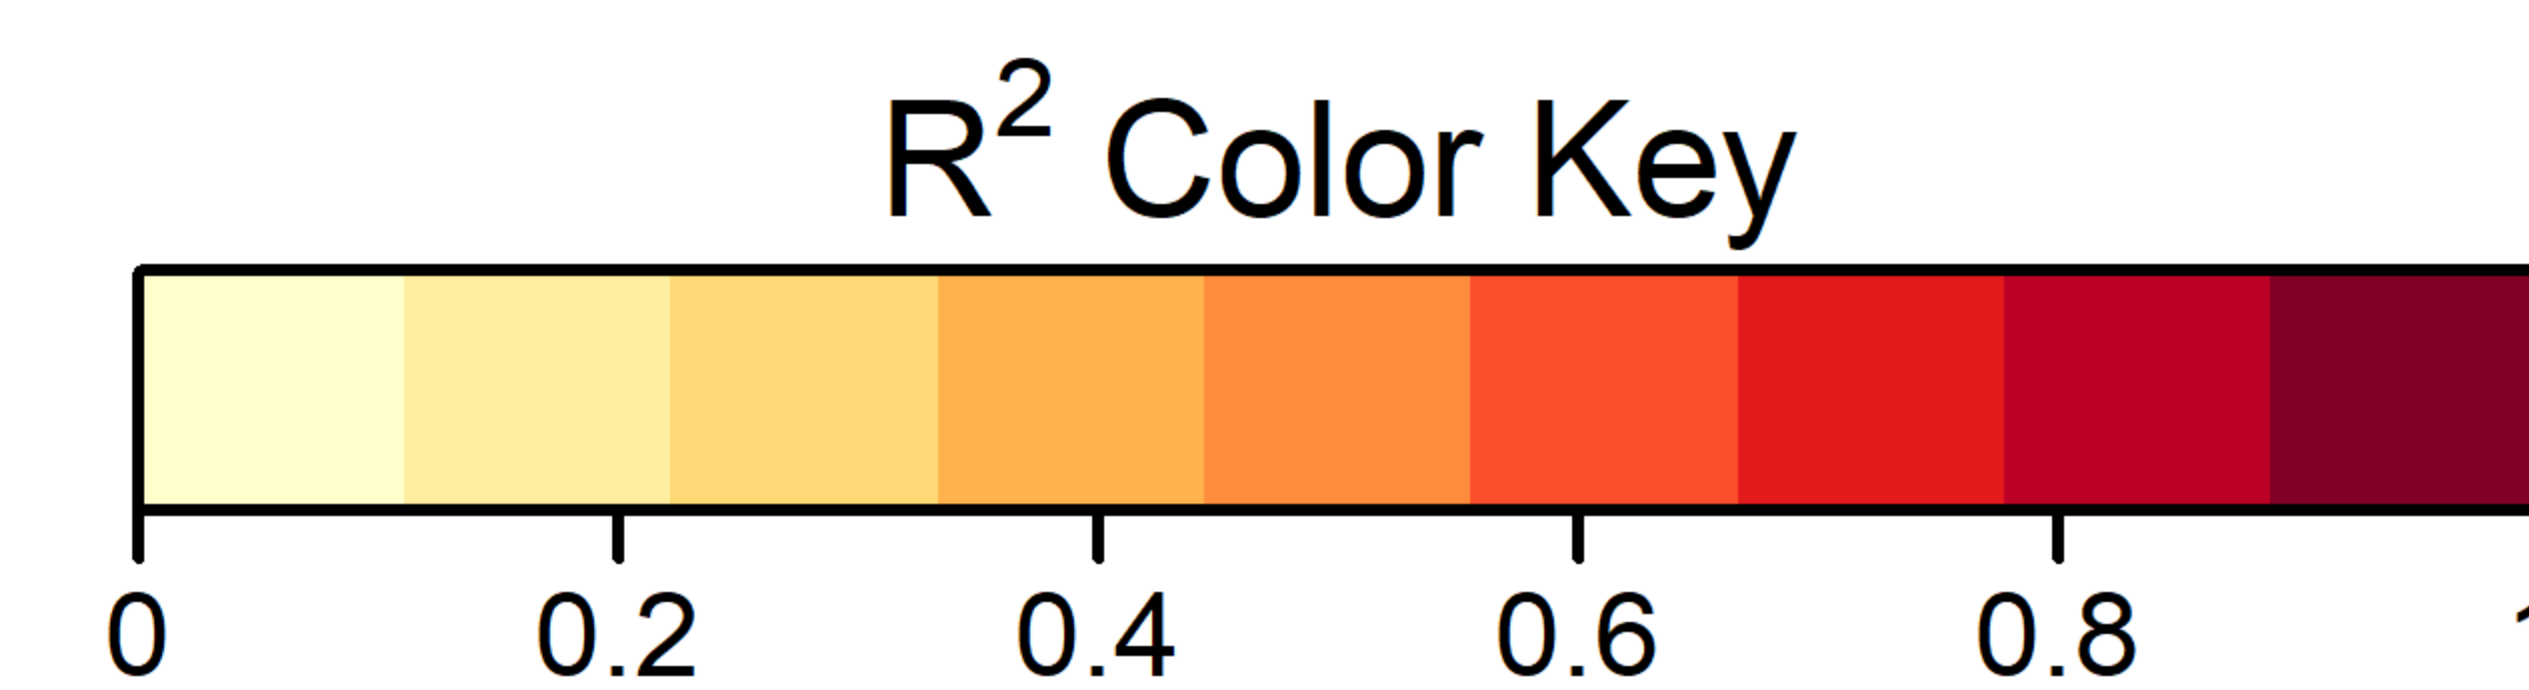



P. maximus - Chromosome 17

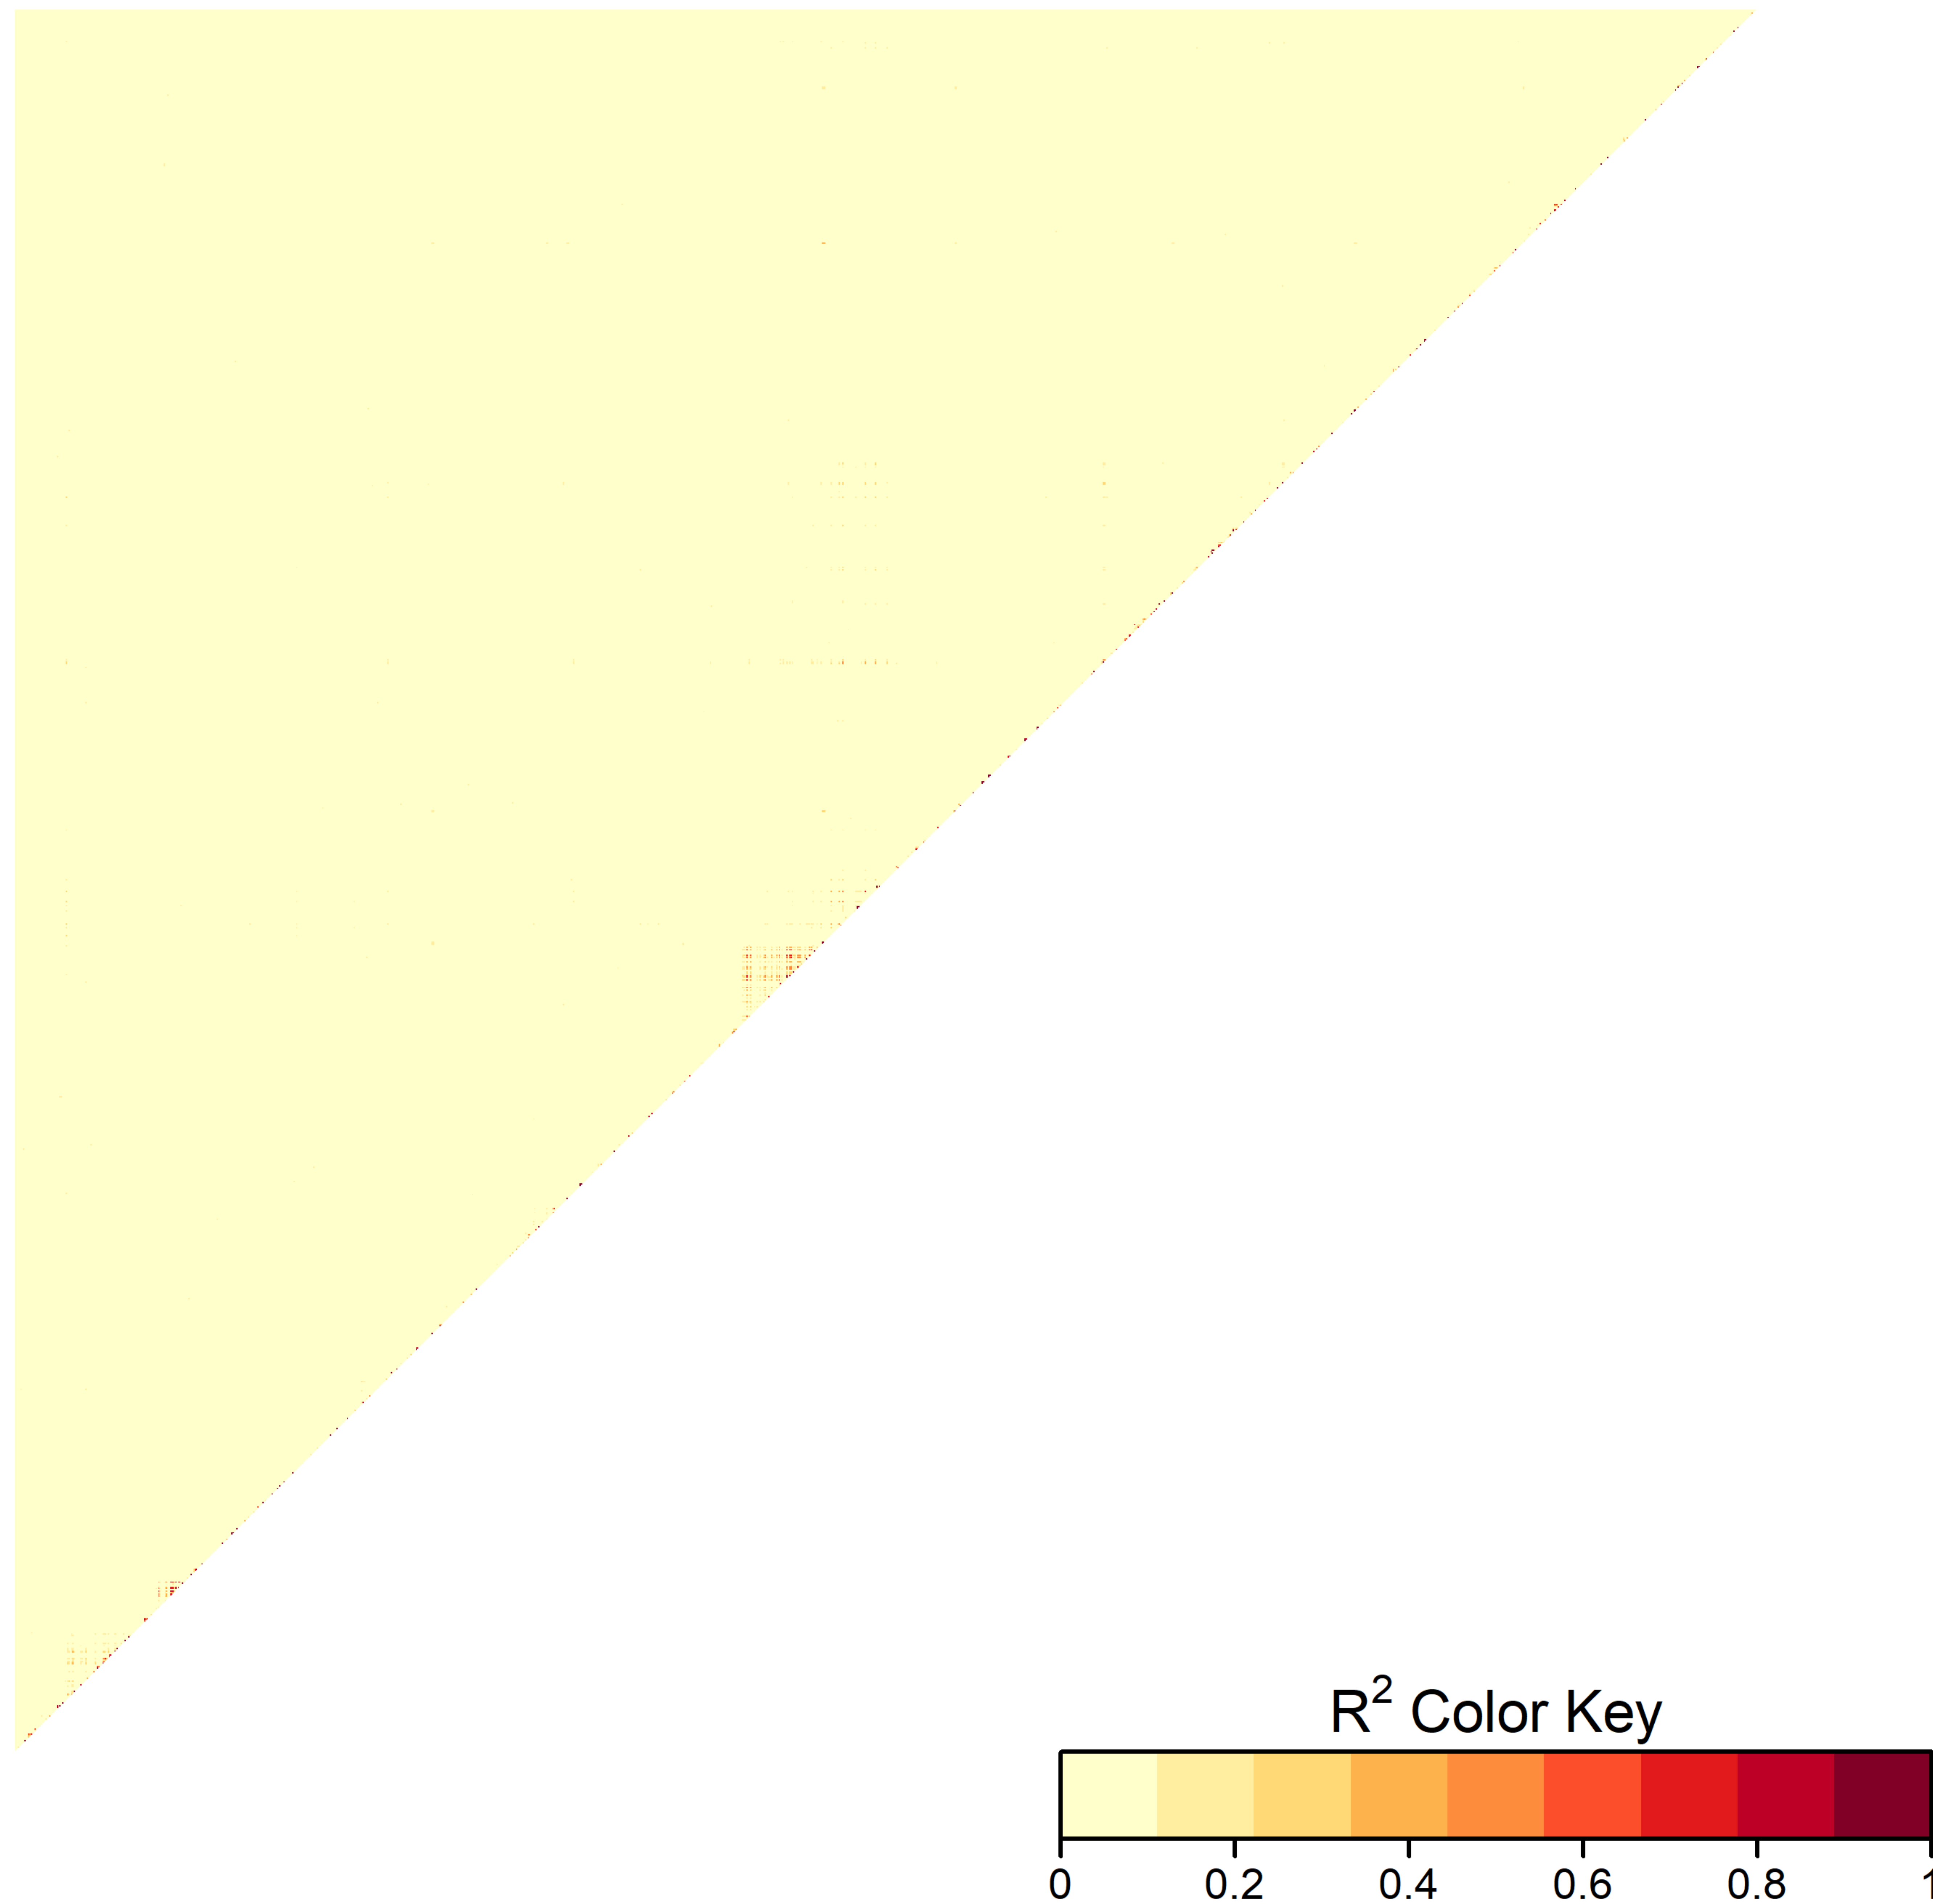

P. jacobaeus - Chromosome 17

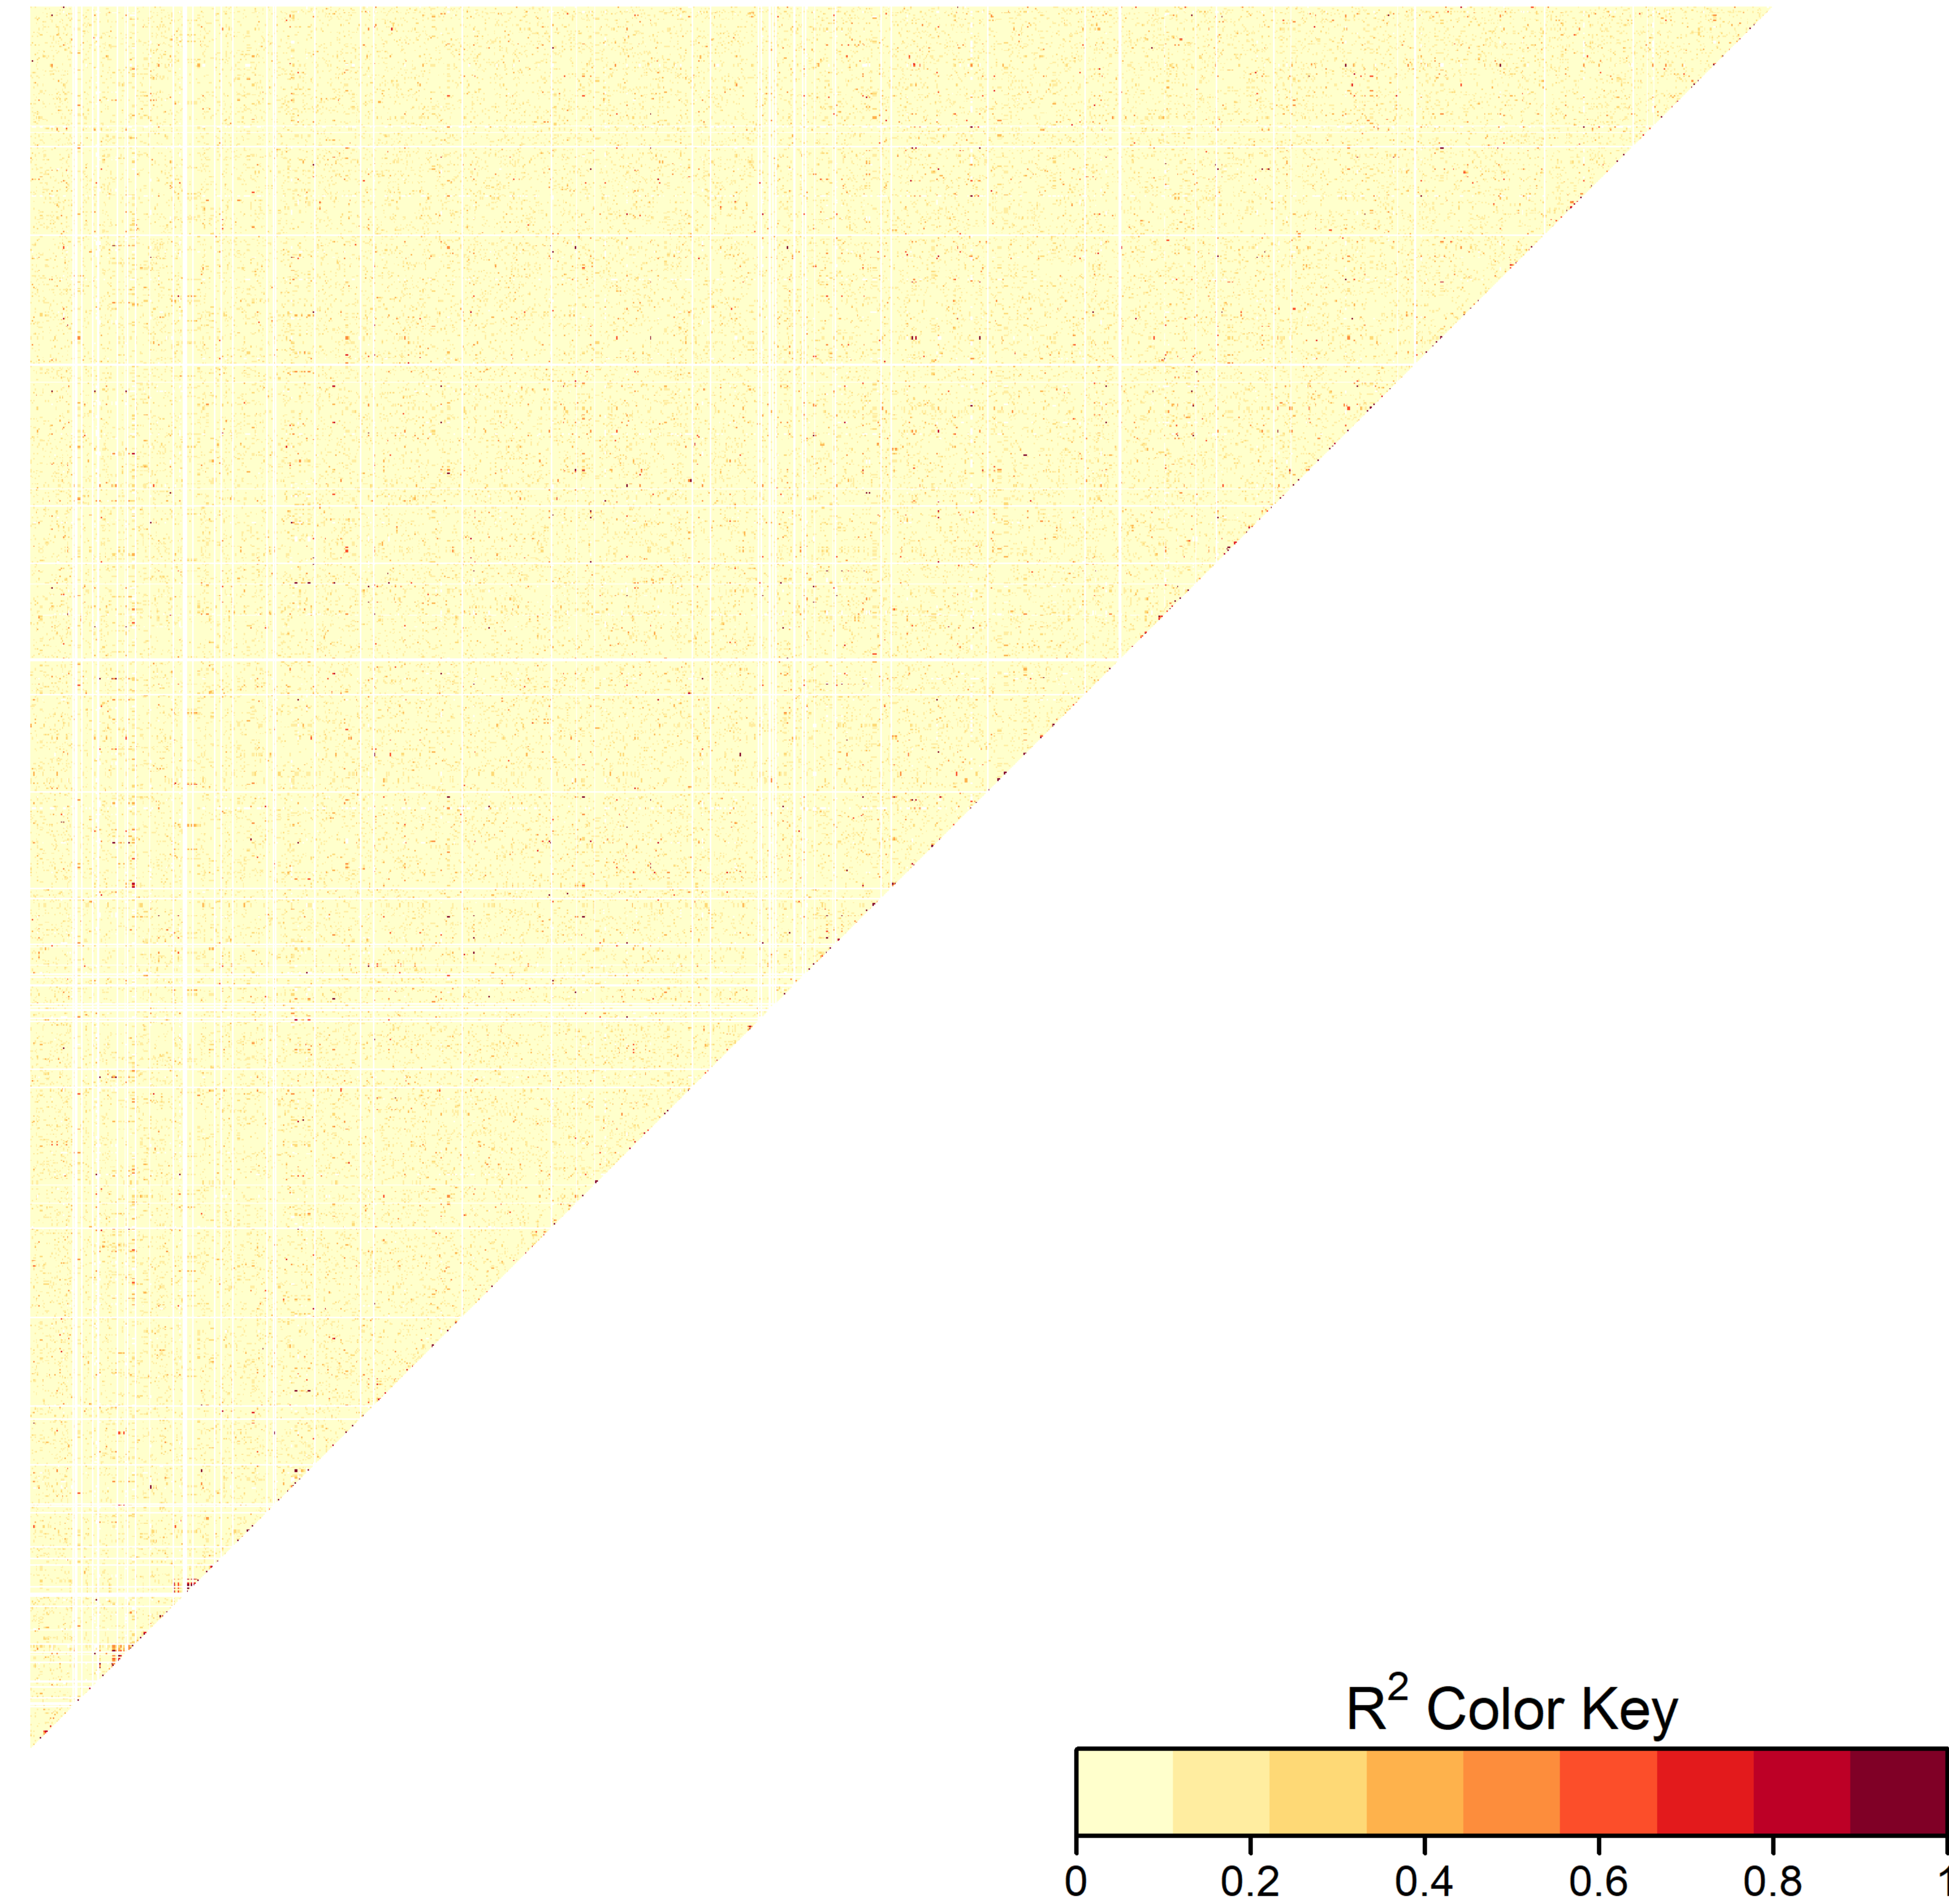



P. maximus - Chromosome 18

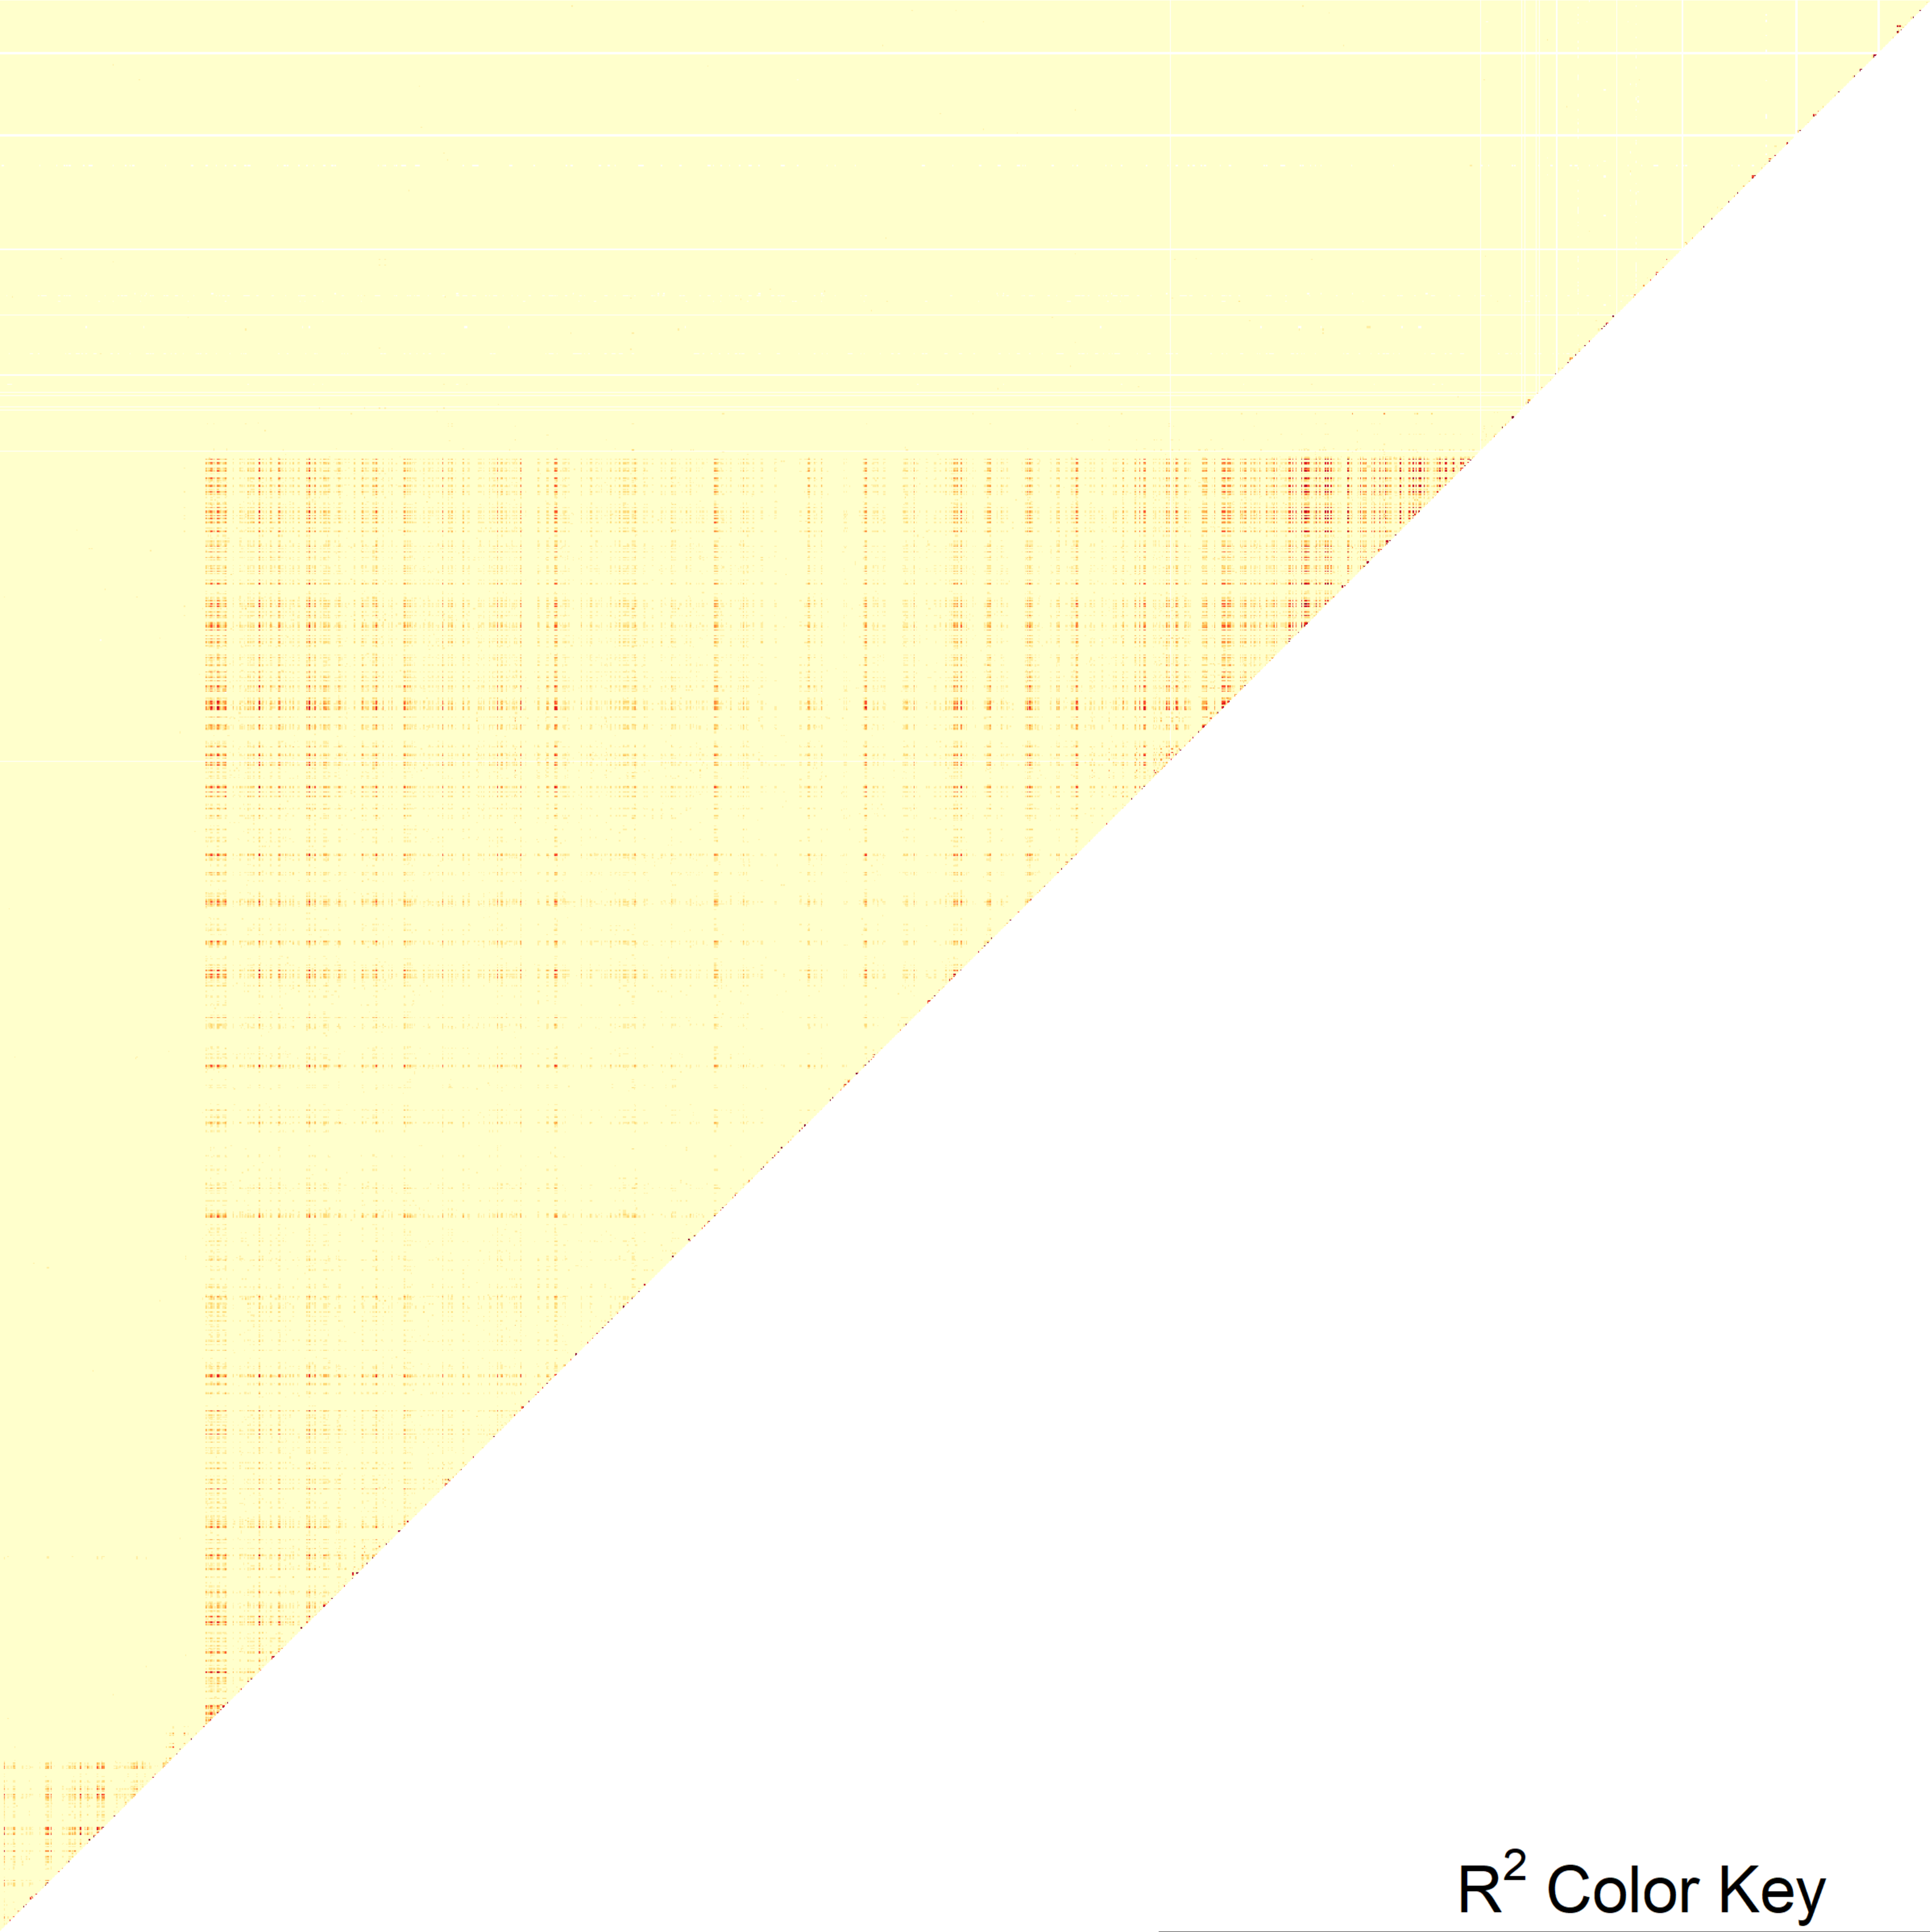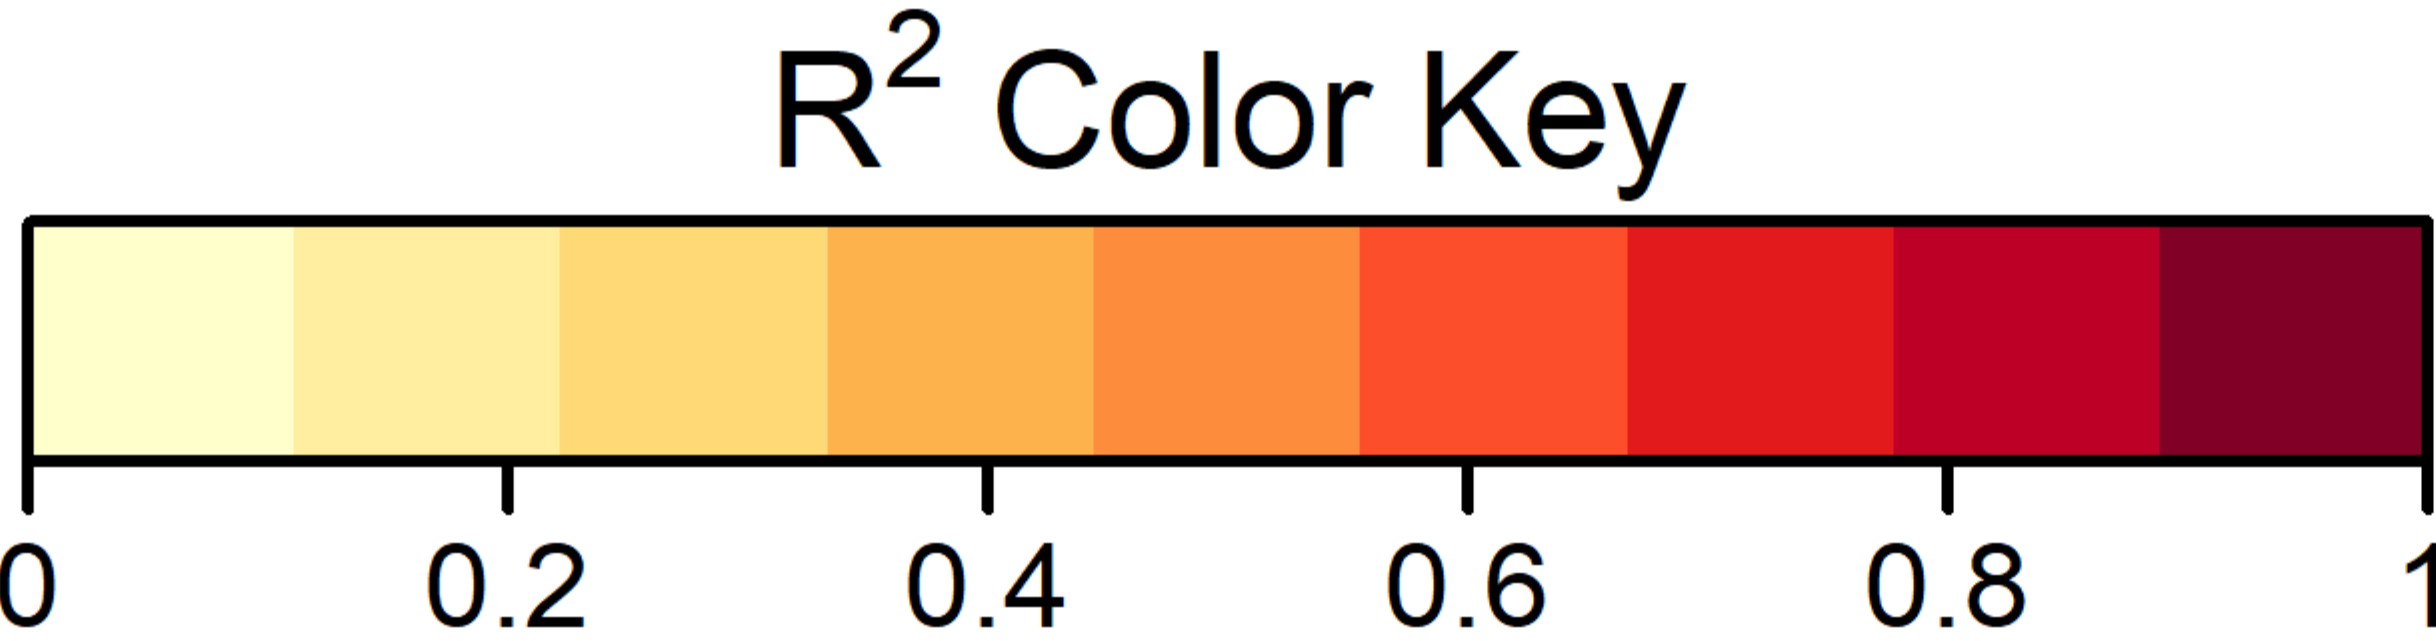

P. jacobaeus - Chromosome 18

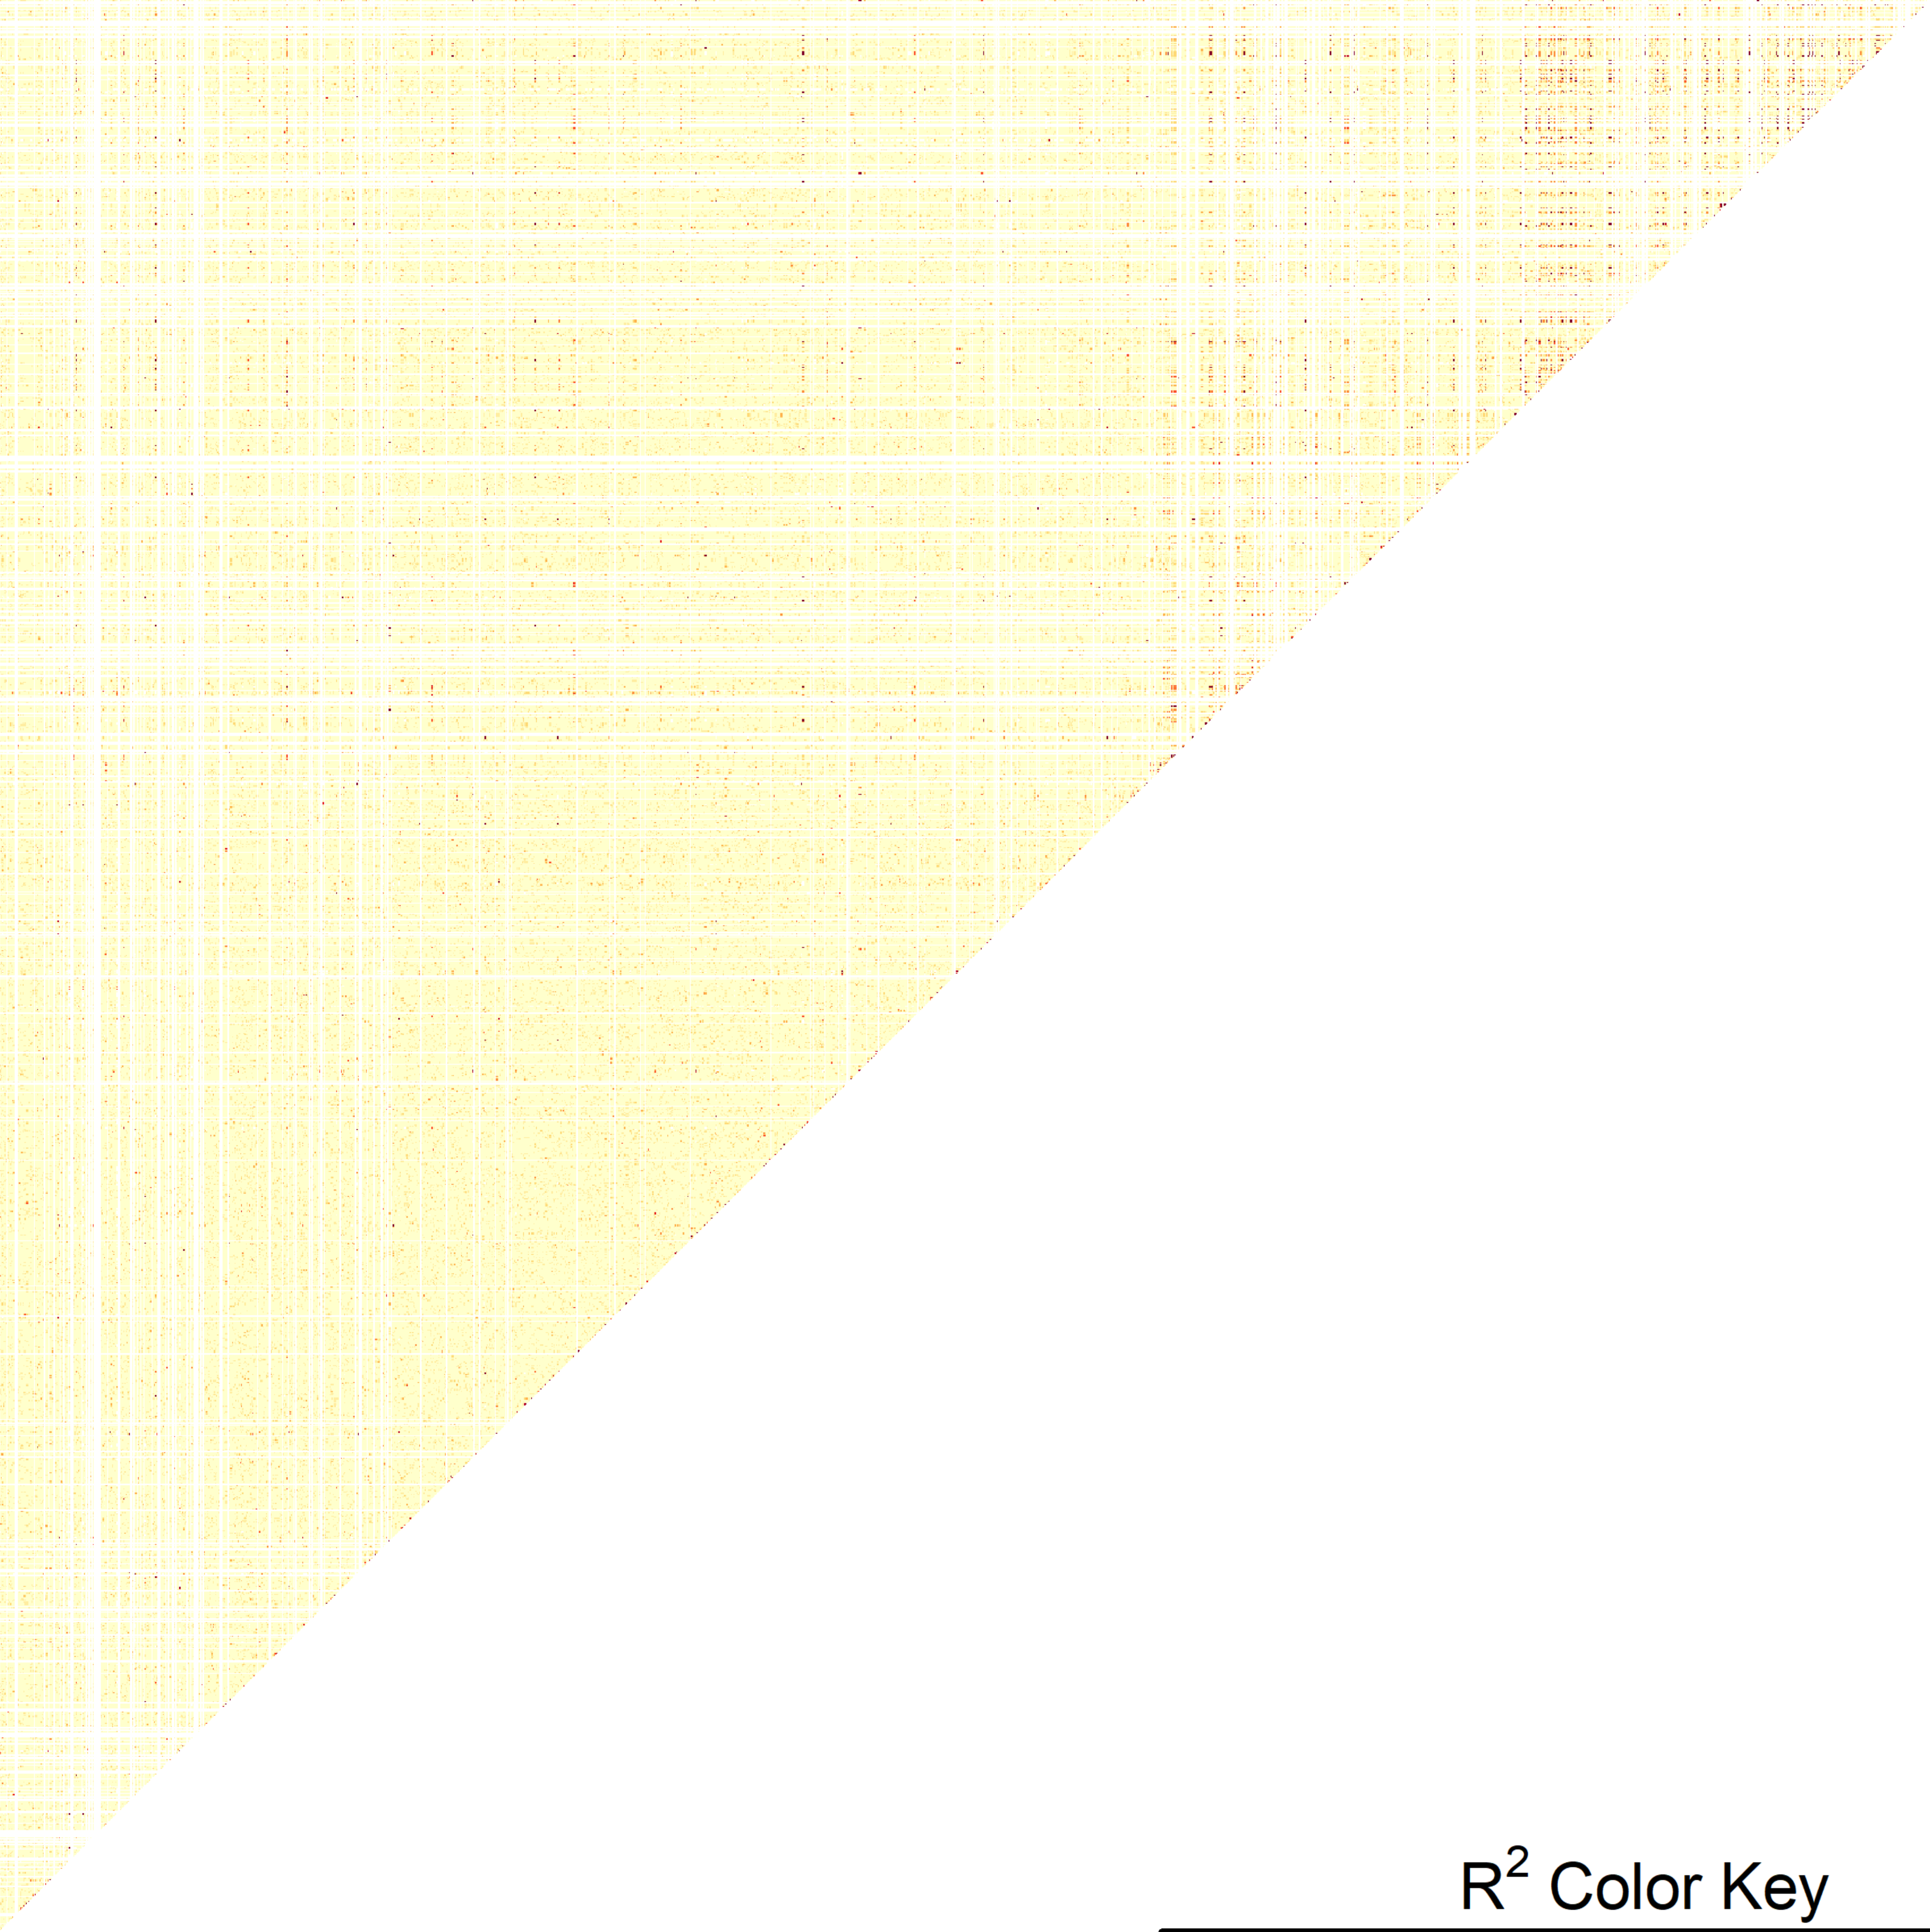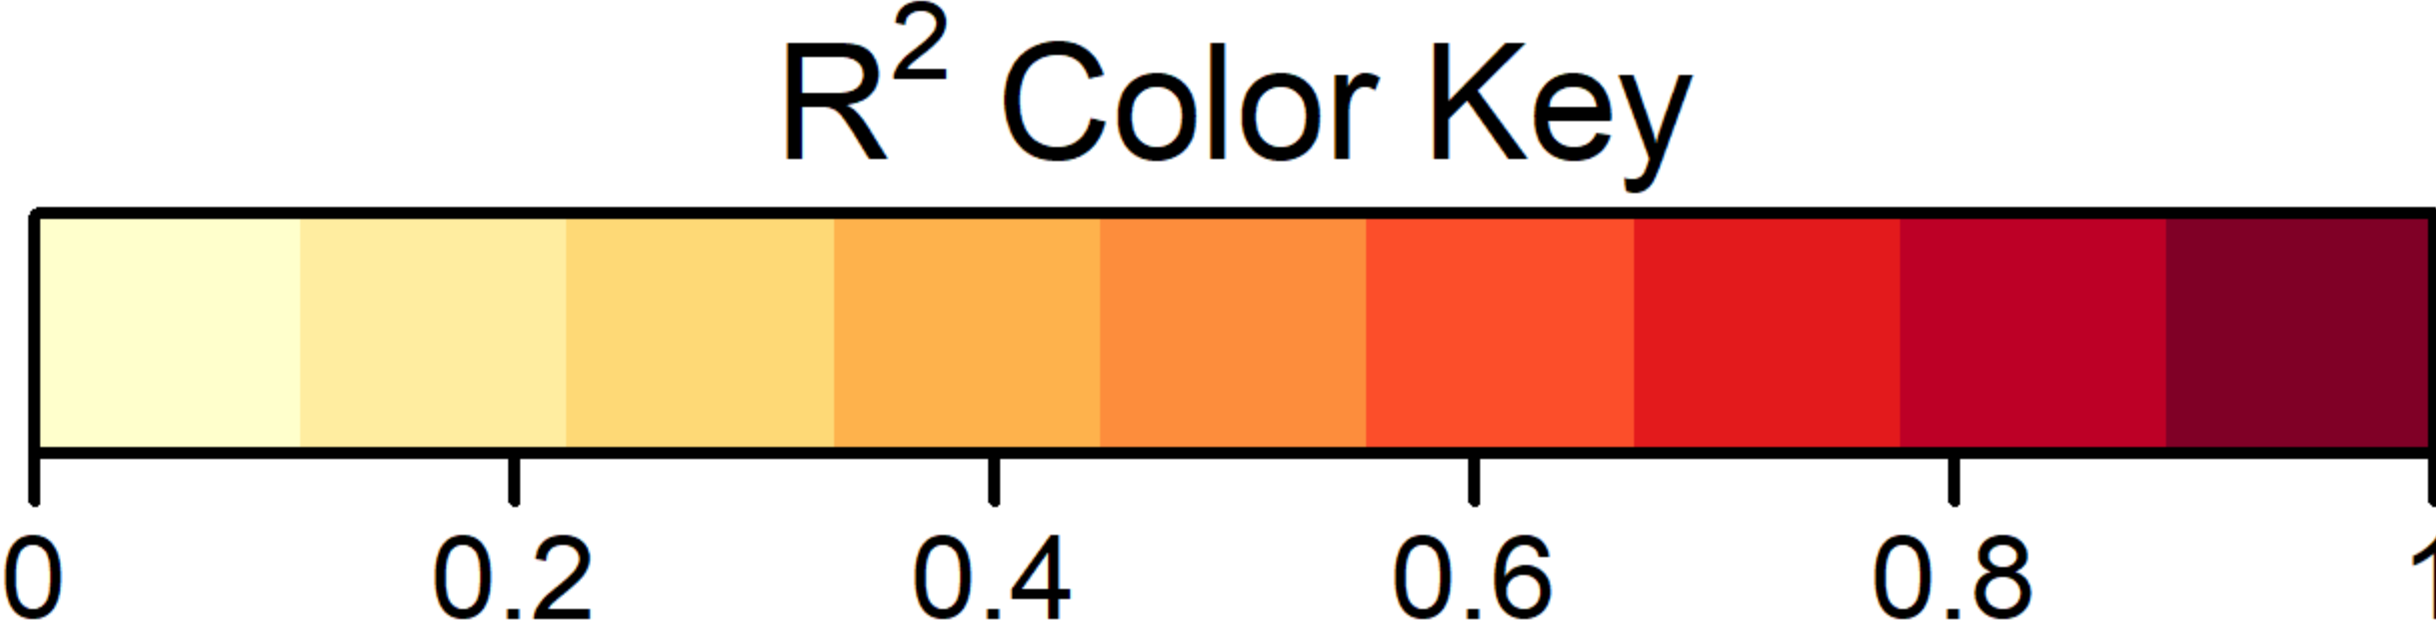



P. maximus - Chromosome 19

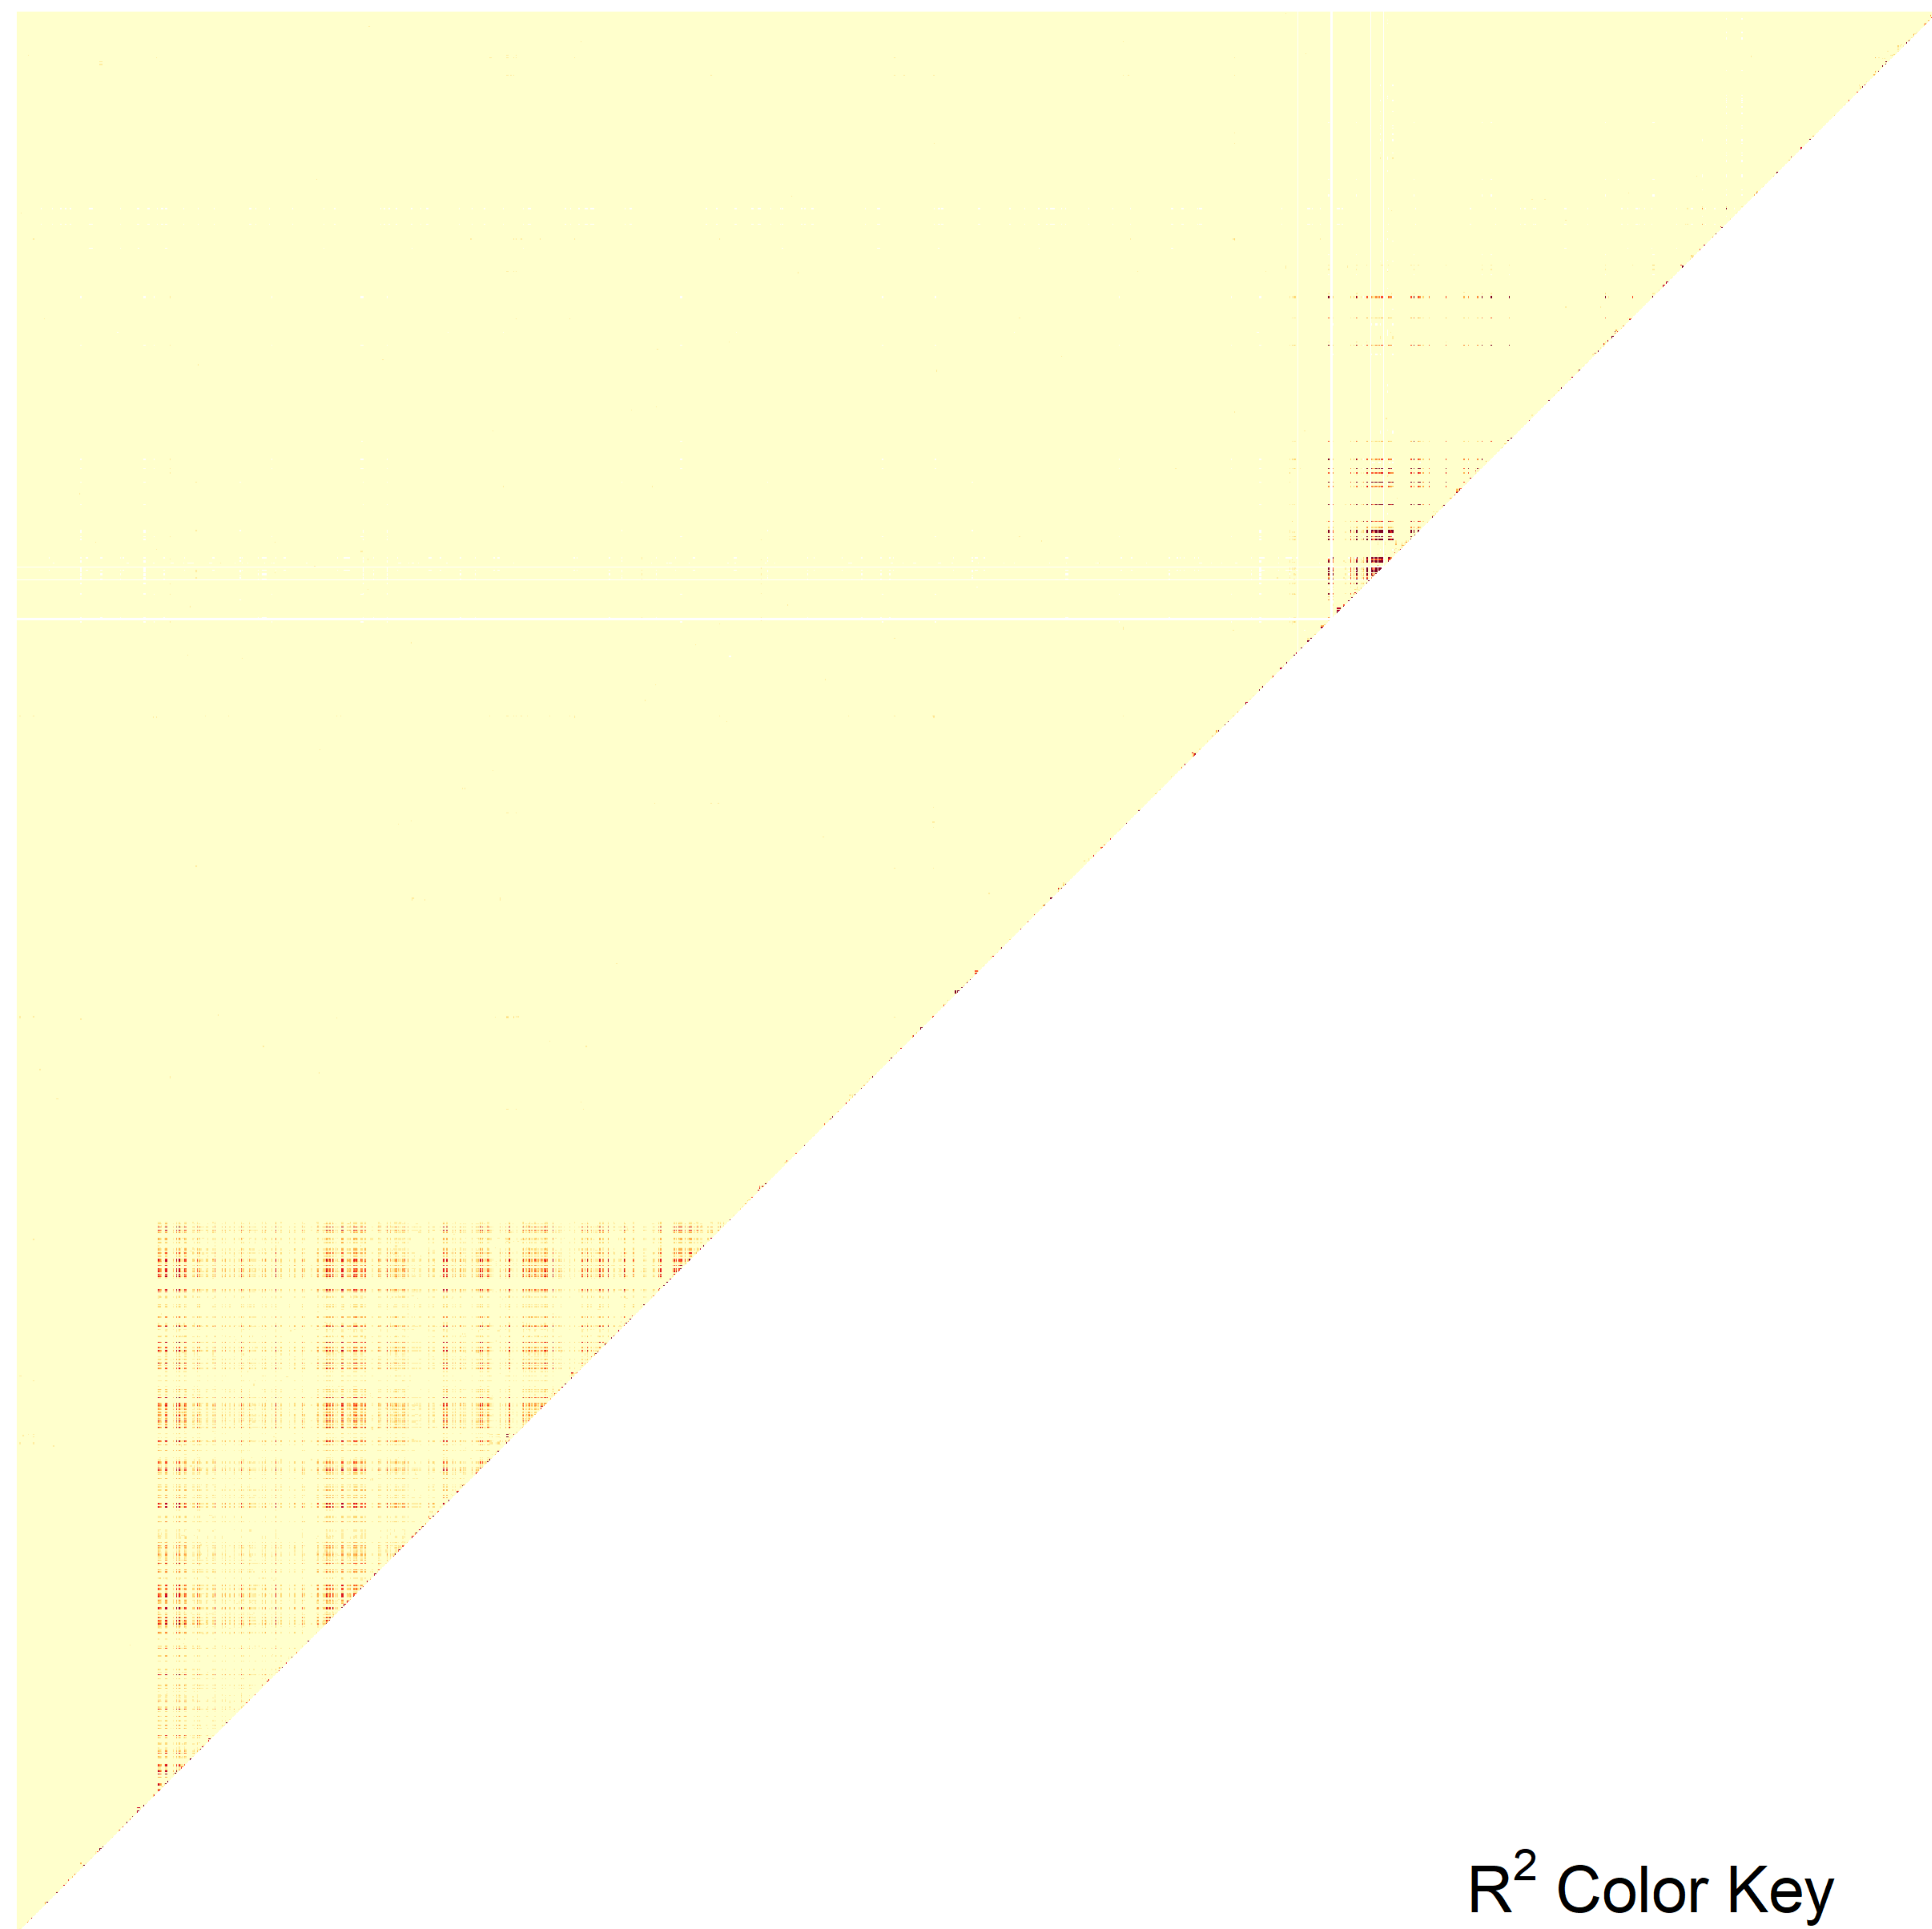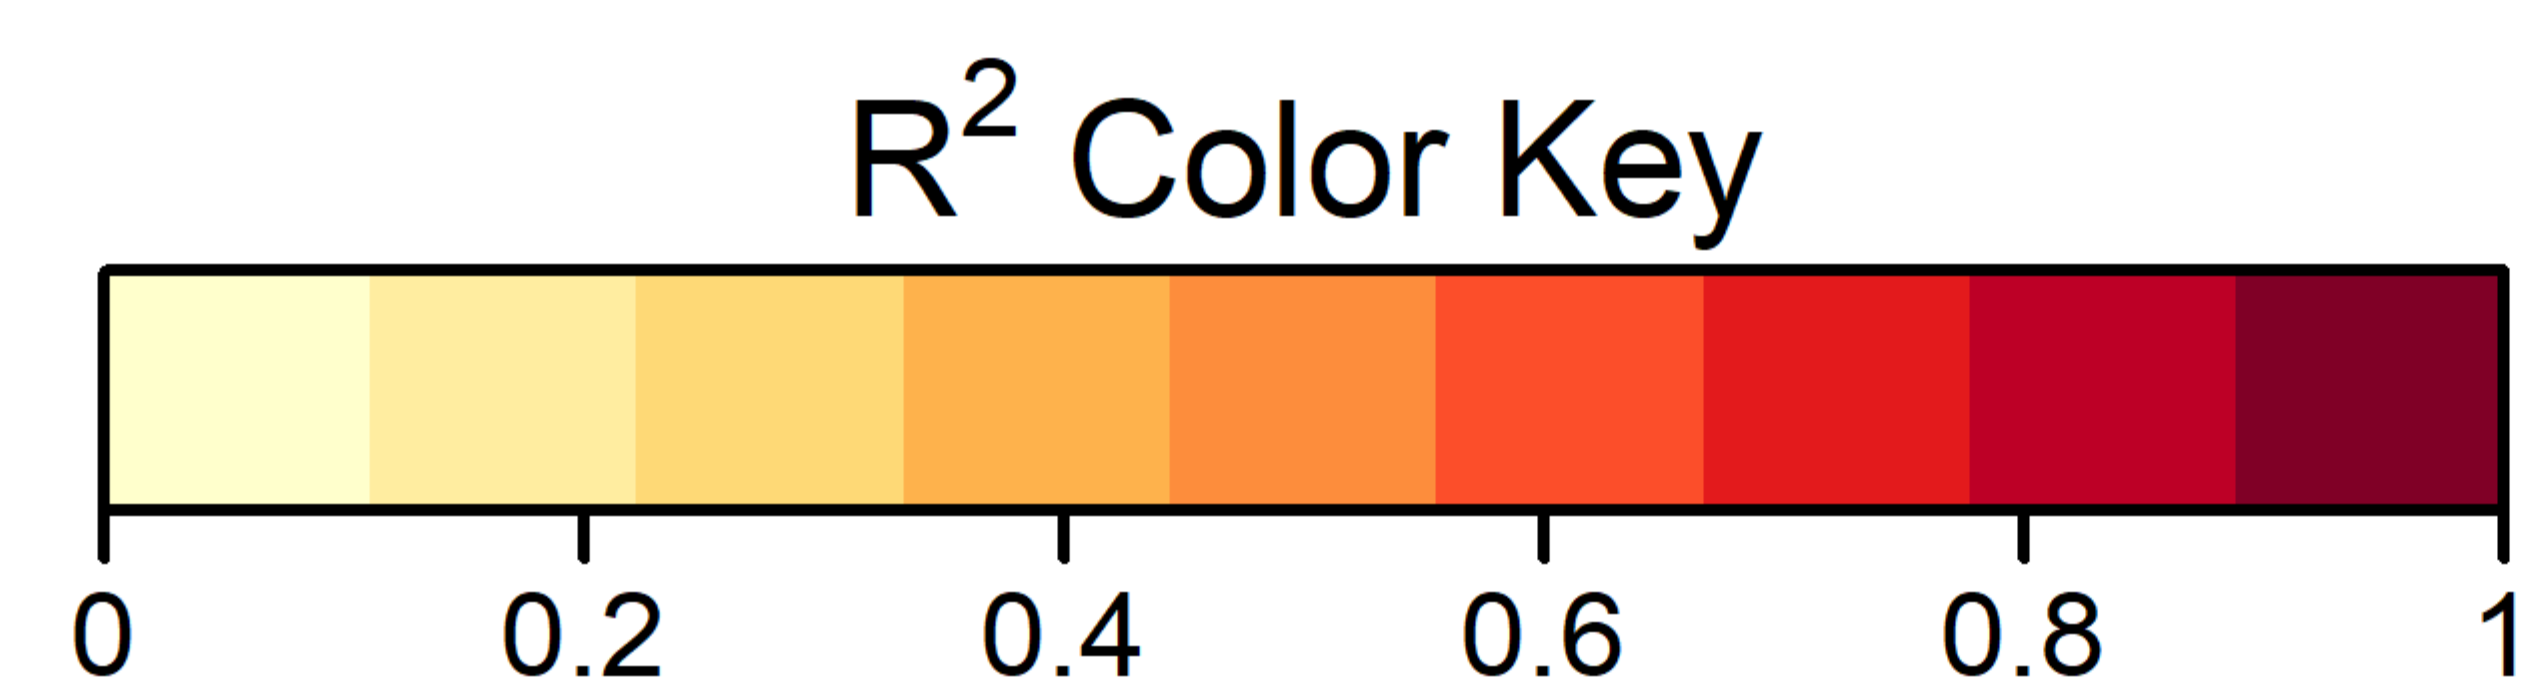

P. jacobaeus - Chromosome 19

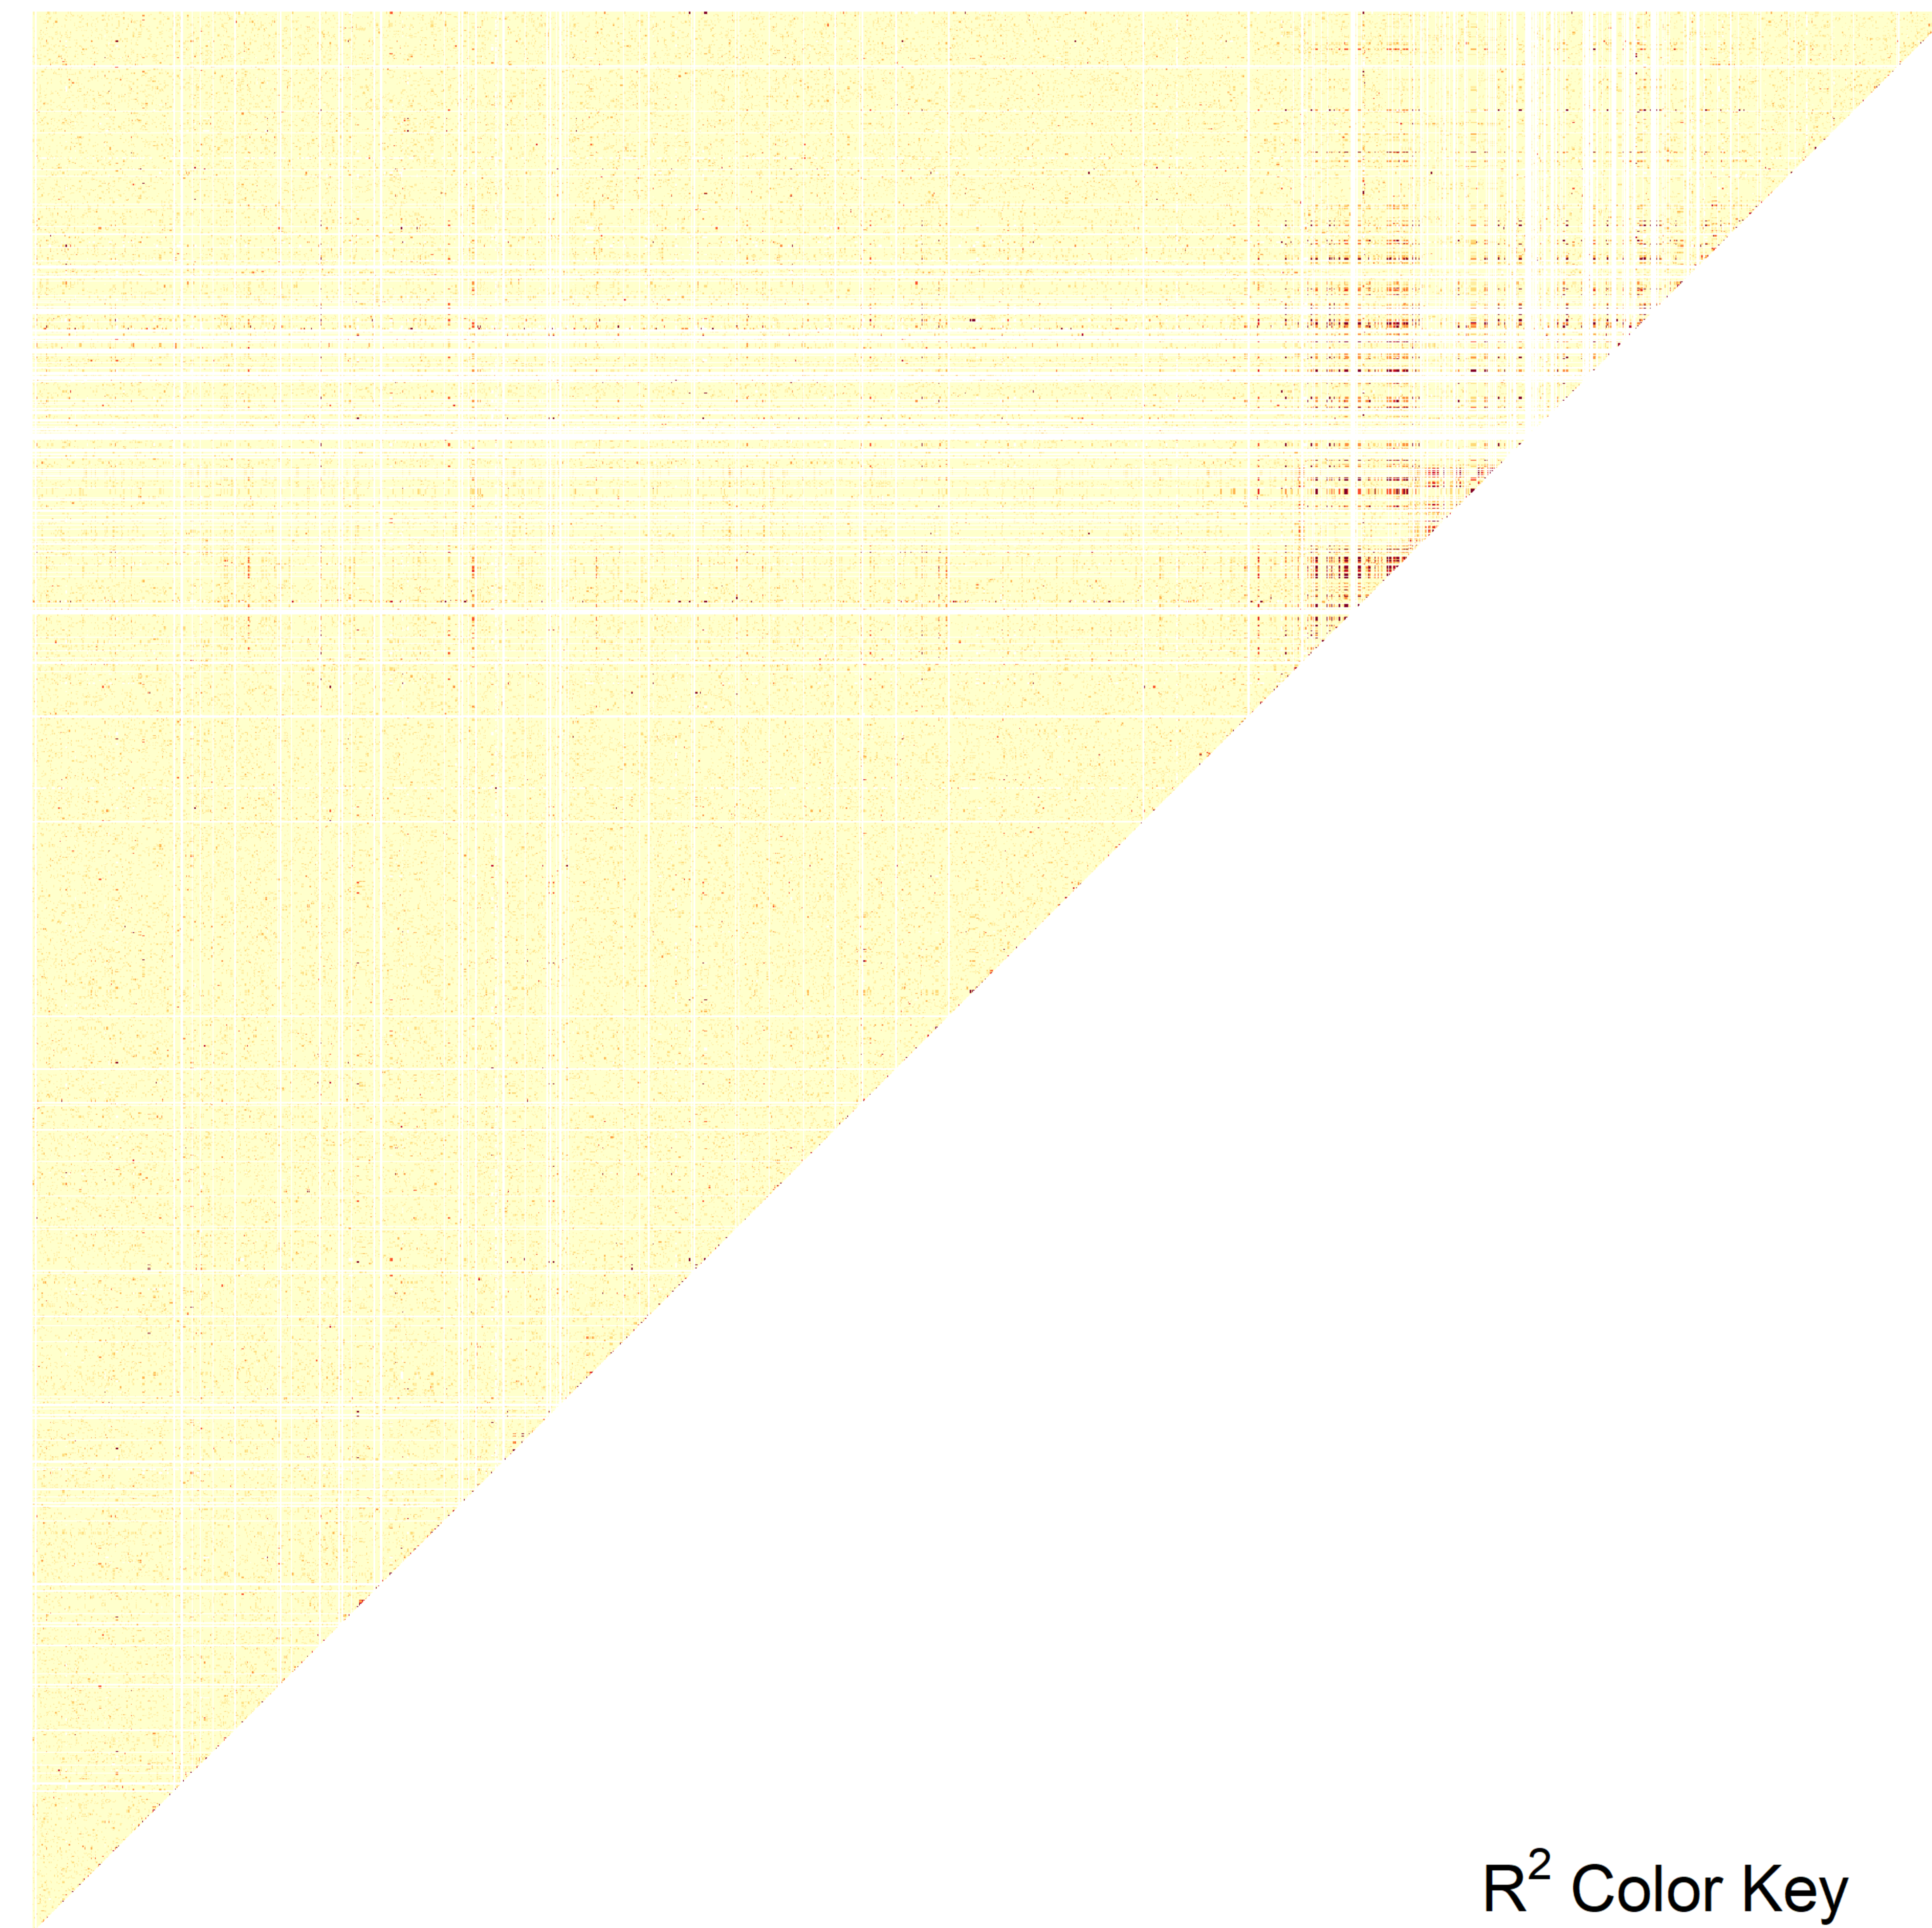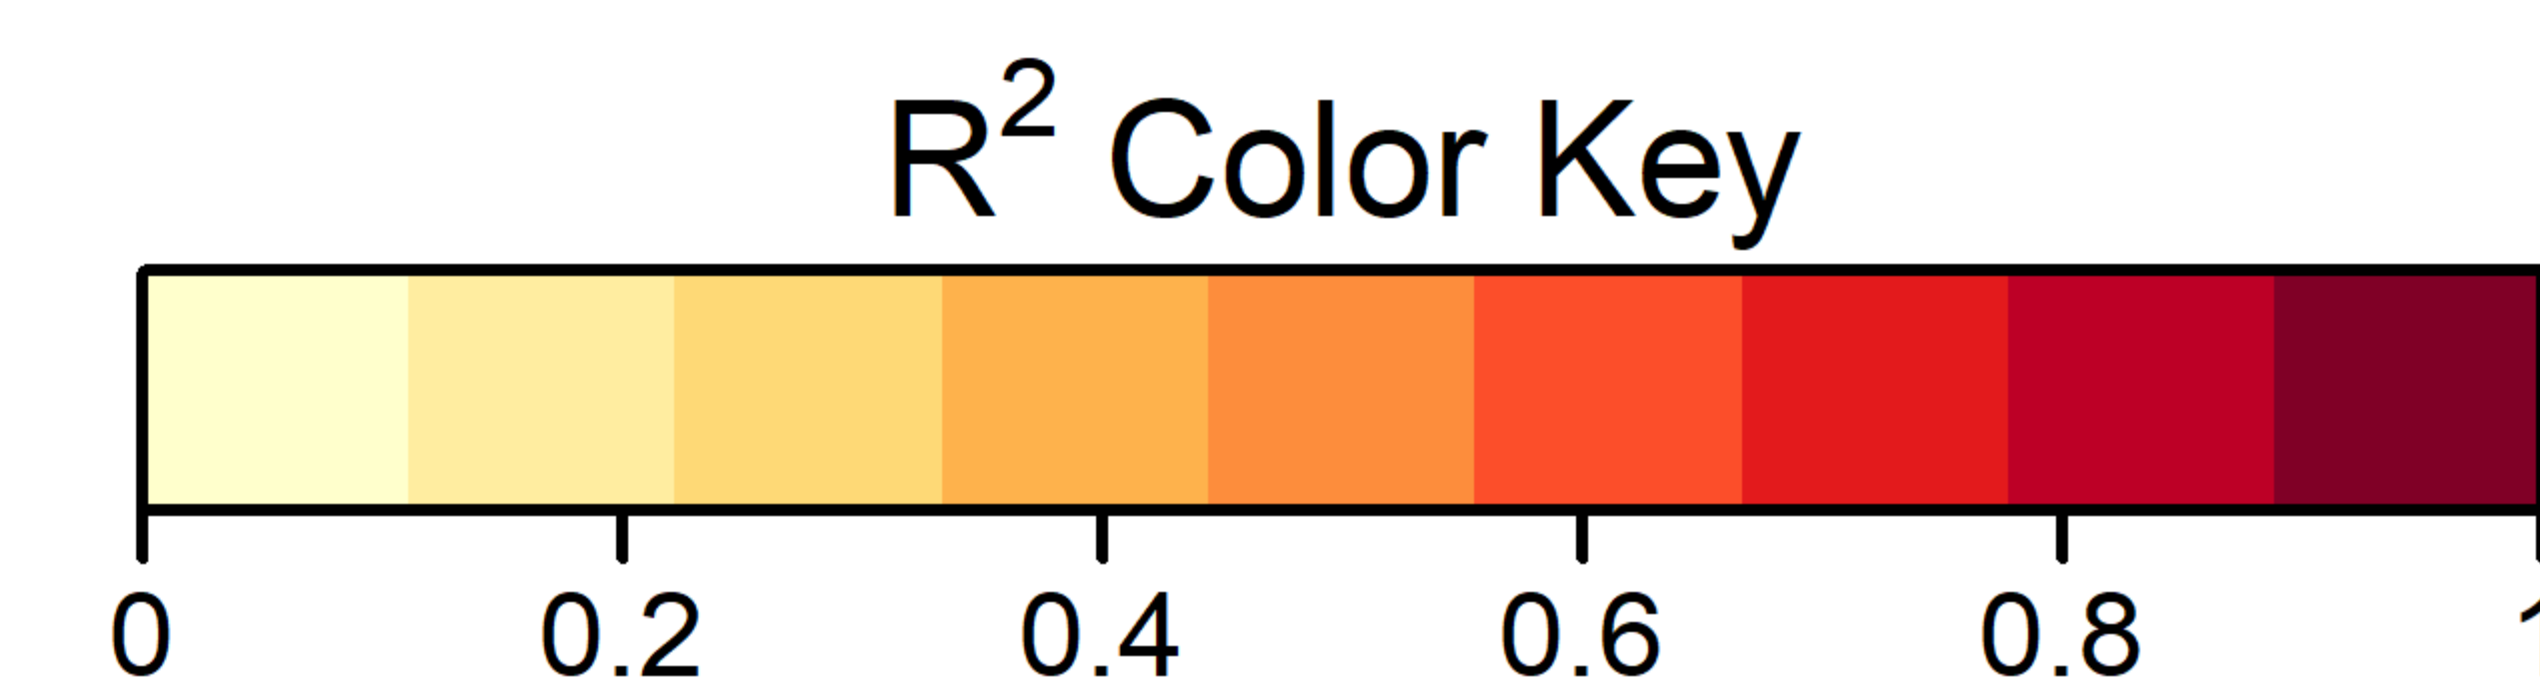

Supplement: s1 [file s1]
