# Supplementary material for: Heterogeneous Genomic Divergence Landscape in Two Commercially Important European Scallop Species
Source: Genes (Basel). 2022 Dec 21;14(1):14. doi: 10.3390/genes14010014 (PMC9858869; doi:10.3390/genes14010014)
Supplement: Supplementary file 1 [file genes-14-00014-s001.zip]

Archive with 16 entries (16 files):
- Figure_S1.tif
- Figure_S2.pdf
- Figure_S3.pdf
- Figure_S4.pdf
- Figure_S5.tiff
- Figure_S6.pdf
- Supplementary material captions.pdf
- Table_S1.xlsx
- Table_S2.xlsx
- Table_S3.xlsx
- Table_S4.xlsx
- Table_S5.xlsx
- Table_S6.txt
- Table_S7.txt
- Table_S8.txt
- Table_S9.txt
