# Supplementary material for: Heterogeneous Genomic Divergence Landscape in Two Commercially Important European Scallop Species
Source: Genes (Basel). 2022 Dec 21;14(1):14. doi: 10.3390/genes14010014 (PMC9858869; doi:10.3390/genes14010014)
Supplement: Supplementary file 1 [file genes-14-00014-s001.zip › Table_S1.xlsx]

## Sheet: Tabelle1
Sampling location	Species	Samples passing QC
Moaña, Spain	P. maximus	20
Lion Gulf, France	P. jacobaeus	19
Novigrad Bay and Banjole, Croatia	P. jacobaeus	8
La Tremblade, France	P. maximus	21
Bay of Brest, France	P. maximus	18
Tinduff, France	P. maximus	16
Port-en-Bessin, France	P. maximus	18
Tucker Rock, UK	P. maximus	20
Bantry Bay, Ireland	P. maximus	20
Mulroy Bay, Ireland	P. maximus	20
Oban, UK	P. maximus	21
Fetlar Island, UK	P. maximus	20
Froan, Norway	P. maximus	21
Bodø, Norway	P. maximus	20
