# Supplementary material for: Heterogeneous Genomic Divergence Landscape in Two Commercially Important European Scallop Species
Source: Genes (Basel). 2022 Dec 21;14(1):14. doi: 10.3390/genes14010014 (PMC9858869; doi:10.3390/genes14010014)
Supplement: Supplementary file 1 [file genes-14-00014-s001.zip › Table_S2.xlsx]

## Sheet: Tabelle1
Parameter	Priors SI model	Priors IM model	Priors AM model	Priors SC model	Priors SCS model
Nanc	100 - 100,000	100 - 100,000	100 - 100,000	100 - 100,000	100 - 100,000
Npma	100 - 100,000	100 - 100,000	100 - 100,000	100 - 100,000	100 - 100,000
Npja	100 - 100,000	100 - 100,000	100 - 100,000	100 - 100,000	100 - 100,000
Ts	50,000 - 300,000	50,000 - 300,000	50,000 - 300,000	50,000 - 300,000	50,000 - 300,000
T1	NA	NA	6,000 - Ts	10 - 6,000	Ts - T2
T2	NA	NA	NA	NA	10 - 6,000
Nmjm	NA	0.01 - 20	0.01 - 20	0.01 - 20	0.01 - 20
Nmmj	NA	0.01 - 20	0.01 - 20	0.01 - 20	0.01 - 20
