# Supplementary material for: Heterogeneous Genomic Divergence Landscape in Two Commercially Important European Scallop Species
Source: Genes (Basel). 2022 Dec 21;14(1):14. doi: 10.3390/genes14010014 (PMC9858869; doi:10.3390/genes14010014)
Supplement: Supplementary file 1 [file genes-14-00014-s001.zip › Table_S3.xlsx]

## Sheet: Tabelle1
Model	Max ln(likelihood)	No. of parameters	AIC
SI	-1693012	4	3386032
IM	-1571340	6	3142692
AM	-1588199	7	3176412
SC	-1560328	7	3120670
SCS	-1553087	8	3106190
