# Supplementary material for: Heterogeneous Genomic Divergence Landscape in Two Commercially Important European Scallop Species
Source: Genes (Basel). 2022 Dec 21;14(1):14. doi: 10.3390/genes14010014 (PMC9858869; doi:10.3390/genes14010014)
Supplement: Supplementary file 1 [file genes-14-00014-s001.zip › Table_S4.xlsx]

## Sheet: Tabelle1
Parameter	Estimate	95% CI
Nanc	194668	189,082 - 270,707
Npma	313532	279,052 - 314,745
Npja	313238	278,462 - 314,615
Ts	299001	235,482 - 329,076
T1	14799	14,020 - 20,850
T2	58	20 - 286
Nmjm	6.88053e-05	6.30E-05 - 7.87E-05
Nmmj	2.47526e-05	2.04E-05 - 2.82E-05
