# Supplementary material for: Heterogeneous Genomic Divergence Landscape in Two Commercially Important European Scallop Species
Source: Genes (Basel). 2022 Dec 21;14(1):14. doi: 10.3390/genes14010014 (PMC9858869; doi:10.3390/genes14010014)
Supplement: Supplementary file 1 [file genes-14-00014-s001.zip › Table_S5.xlsx]

## Sheet: ST_pi
Chromosome	π (x 105), P. maximus	π (x 105), P. jacobaeus
1	1.75	1.84
2	1.78	1.45
3	1.79	1.61
4	1.88	1.92
5	1.74	1.84
6	1.87	1.93
7	1.82	1.72
8	1.78	1.78
9	1.71	1.73
10	1.59	1.28
11	1.69	1.37
12	1.85	1.83
13	1.76	1.62
14	1.85	1.55
15	1.89	1.59
16	1.78	1.84
17	1.79	1.81
18	1.89	1.72
19	1.94	1.73
Unplaced	1.94	1.71
Total	1.8	1.69
