# Supplementary material for: Heterogeneous Genomic Divergence Landscape in Two Commercially Important European Scallop Species
Source: Genes (Basel). 2022 Dec 21;14(1):14. doi: 10.3390/genes14010014 (PMC9858869; doi:10.3390/genes14010014)
Supplement: Supplementary file 1 [file genes-14-00014-s001.zip › Table_S6.txt]

Scaffold	Position	P_maximus_allele	P_jacobaeus_allele
HiC_scaffold_2	29094177	C	T
HiC_scaffold_2	36529941	A	C
HiC_scaffold_2	37758110	C	G
HiC_scaffold_2	37758077	A	G
HiC_scaffold_10	27320828	G	T
HiC_scaffold_10	27414099	C	G
HiC_scaffold_11	24553531	G	T
HiC_scaffold_11	24748579	T	A
HiC_scaffold_11	24847905	C	A
HiC_scaffold_11	24893050	T	G
HiC_scaffold_11	25041438	A	G
HiC_scaffold_11	25041439	C	T
HiC_scaffold_11	25655556	C	G
HiC_scaffold_11	26775629	A	C
HiC_scaffold_11	27041601	G	C
HiC_scaffold_11	27262040	A	G
HiC_scaffold_11	27374363	A	C
HiC_scaffold_11	27689725	C	G
HiC_scaffold_11	28533877	G	C
HiC_scaffold_11	28674640	C	T
HiC_scaffold_11	28878935	T	C
HiC_scaffold_11	29100168	C	T
HiC_scaffold_11	29148302	C	G
HiC_scaffold_11	29238461	A	G
HiC_scaffold_11	29238419	A	T
HiC_scaffold_11	29358303	C	A
HiC_scaffold_11	29426228	A	C
HiC_scaffold_11	29535074	T	G
HiC_scaffold_11	29535083	T	G
HiC_scaffold_11	29728493	C	T
HiC_scaffold_11	29745329	G	A
HiC_scaffold_11	29752207	G	A
HiC_scaffold_11	29934529	G	T
HiC_scaffold_11	30158343	T	C
HiC_scaffold_11	30161412	A	C
HiC_scaffold_11	30186234	T	C
HiC_scaffold_11	30246068	T	G
HiC_scaffold_11	30246042	G	C
HiC_scaffold_11	30256534	T	G
HiC_scaffold_11	30813737	A	G
HiC_scaffold_11	30982642	G	C
HiC_scaffold_11	32039383	A	G
HiC_scaffold_11	32262202	G	T
HiC_scaffold_11	32262205	T	G
HiC_scaffold_11	32625765	G	A
HiC_scaffold_11	32645492	T	A
HiC_scaffold_11	32796920	T	C
HiC_scaffold_11	32846972	C	T
HiC_scaffold_11	33283104	T	C
HiC_scaffold_11	33398182	T	C
HiC_scaffold_11	33498525	G	A
HiC_scaffold_11	34266165	A	C
HiC_scaffold_11	34270741	G	A
HiC_scaffold_11	34417564	G	T
HiC_scaffold_11	34417556	T	G
HiC_scaffold_11	34417537	G	C
HiC_scaffold_11	34630195	T	C
HiC_scaffold_11	34630145	T	C
HiC_scaffold_11	34646489	G	A
HiC_scaffold_11	34825592	T	A
HiC_scaffold_14	26352202	T	A
HiC_scaffold_18	32182198	A	G
