# Supplementary material for: Heterogeneous Genomic Divergence Landscape in Two Commercially Important European Scallop Species
Source: Genes (Basel). 2022 Dec 21;14(1):14. doi: 10.3390/genes14010014 (PMC9858869; doi:10.3390/genes14010014)
Supplement: Supplementary file 1 [file genes-14-00014-s001.zip › Table_S7.txt]

GO.ID	Term	classicFisher
GO:0002755	MyD88-dependent toll-like receptor signa...	0.0045
GO:0009058	biosynthetic process	0.0048
GO:0034472	snRNA 3'-end processing	0.018
GO:0032456	endocytic recycling	0.018
GO:0036265	RNA (guanine-N7)-methylation	0.018
GO:0006777	Mo-molybdopterin cofactor biosynthetic p...	0.018
GO:0006465	signal peptide processing	0.0357
GO:0045454	cell redox homeostasis	0.0579
GO:0035556	intracellular signal transduction	0.1055
GO:0006605	protein targeting	0.1354
GO:0006388	tRNA splicing, via endonucleolytic cleav...	0.1354
GO:0006807	nitrogen compound metabolic process	0.1683
GO:0006886	intracellular protein transport	0.1976
GO:0006396	RNA processing	0.223
GO:0007154	cell communication	0.2572
GO:0007165	signal transduction	0.2917
GO:0042254	ribosome biogenesis	0.3431
GO:0000413	protein peptidyl-prolyl isomerization	0.3784
GO:0016579	protein deubiquitination	0.401
GO:0006812	cation transport	0.5378
GO:0006351	transcription, DNA-templated	0.7369
GO:0006508	proteolysis	0.7533
GO:0006464	cellular protein modification process	0.9822
GO:0002224	toll-like receptor signaling pathway	1
GO:0008104	protein localization	1
GO:0006139	nucleobase-containing compound metabolic...	1
GO:0006796	phosphate-containing compound metabolic ...	1
GO:0034660	ncRNA metabolic process	1
GO:0090304	nucleic acid metabolic process	1
GO:0036211	protein modification process	1
GO:0043170	macromolecule metabolic process	1
GO:0044249	cellular biosynthetic process	1
GO:0051189	prosthetic group metabolic process	1
GO:0043603	cellular amide metabolic process	1
GO:0045184	establishment of protein localization	1
GO:0071840	cellular component organization or bioge...	1
GO:0050896	response to stimulus	1
GO:0043412	macromolecule modification	1
GO:0010467	gene expression	1
GO:0022613	ribonucleoprotein complex biogenesis	1
GO:0051604	protein maturation	1
GO:0044260	cellular macromolecule metabolic process	1
GO:0043414	macromolecule methylation	1
GO:0044237	cellular metabolic process	1
GO:0046907	intracellular transport	1
GO:0046483	heterocycle metabolic process	1
GO:0044238	primary metabolic process	1
GO:0034654	nucleobase-containing compound biosynthe...	1
GO:0034470	ncRNA processing	1
GO:0051179	localization	1
GO:0006399	tRNA metabolic process	1
GO:0044267	cellular protein metabolic process	1
GO:0032774	RNA biosynthetic process	1
GO:0044085	cellular component biogenesis	1
GO:0002376	immune system process	1
GO:0090407	organophosphate biosynthetic process	1
GO:0006810	transport	1
GO:0000394	RNA splicing, via endonucleolytic cleava...	1
GO:0006811	ion transport	1
GO:0043628	ncRNA 3'-end processing	1
GO:0016485	protein processing	1
GO:0009451	RNA modification	1
GO:0043545	molybdopterin cofactor metabolic process	1
GO:1901576	organic substance biosynthetic process	1
GO:0009987	cellular process	1
GO:0001510	RNA methylation	1
GO:0018193	peptidyl-amino acid modification	1
GO:0008380	RNA splicing	1
GO:0071702	organic substance transport	1
GO:0018208	peptidyl-proline modification	1
GO:0019438	aromatic compound biosynthetic process	1
GO:0071704	organic substance metabolic process	1
GO:0016180	snRNA processing	1
GO:0097659	nucleic acid-templated transcription	1
GO:0071705	nitrogen compound transport	1
GO:0019538	protein metabolic process	1
GO:0002682	regulation of immune system process	1
GO:0008033	tRNA processing	1
GO:0006518	peptide metabolic process	1
GO:0016070	RNA metabolic process	1
GO:0051641	cellular localization	1
GO:0044271	cellular nitrogen compound biosynthetic ...	1
GO:0009059	macromolecule biosynthetic process	1
GO:0016073	snRNA metabolic process	1
GO:0019720	Mo-molybdopterin cofactor metabolic proc...	1
GO:0098876	vesicle-mediated transport to the plasma...	1
GO:0031123	RNA 3'-end processing	1
GO:0002764	immune response-regulating signaling pat...	1
GO:0019725	cellular homeostasis	1
GO:0050789	regulation of biological process	1
GO:0051649	establishment of localization in cell	1
GO:0033036	macromolecule localization	1
GO:1901360	organic cyclic compound metabolic proces...	1
GO:1901362	organic cyclic compound biosynthetic pro...	1
GO:0019637	organophosphate metabolic process	1
GO:0008150	biological_process	1
GO:0008152	metabolic process	1
GO:0070646	protein modification by small protein re...	1
GO:0034613	cellular protein localization	1
GO:0070647	protein modification by small protein co...	1
GO:0042592	homeostatic process	1
GO:0050776	regulation of immune response	1
GO:0018130	heterocycle biosynthetic process	1
GO:0032259	methylation	1
GO:0006955	immune response	1
GO:0016192	vesicle-mediated transport	1
GO:0051668	localization within membrane	1
GO:0015031	protein transport	1
GO:0023052	signaling	1
GO:0070727	cellular macromolecule localization	1
GO:0016197	endosomal transport	1
GO:0065007	biological regulation	1
GO:0048583	regulation of response to stimulus	1
GO:0065008	regulation of biological quality	1
GO:0034641	cellular nitrogen compound metabolic pro...	1
GO:0051716	cellular response to stimulus	1
GO:0034645	cellular macromolecule biosynthetic proc...	1
GO:0051234	establishment of localization	1
GO:0050794	regulation of cellular process	1
GO:1901564	organonitrogen compound metabolic proces...	1
GO:0002221	pattern recognition receptor signaling p...	1
GO:0006725	cellular aromatic compound metabolic pro...	1
GO:1901566	organonitrogen compound biosynthetic pro...	1
GO:0006793	phosphorus metabolic process	1
GO:0000003	reproduction	1
GO:0000012	single strand break repair	1
GO:0000027	ribosomal large subunit assembly	1
GO:0000038	very long-chain fatty acid metabolic pro...	1
GO:0000041	transition metal ion transport	1
GO:0000045	autophagosome assembly	1
GO:0000054	ribosomal subunit export from nucleus	1
GO:0000055	ribosomal large subunit export from nucl...	1
GO:0000070	mitotic sister chromatid segregation	1
GO:0000075	cell cycle checkpoint signaling	1
GO:0000077	DNA damage checkpoint signaling	1
GO:0000079	regulation of cyclin-dependent protein s...	1
GO:0000086	G2/M transition of mitotic cell cycle	1
GO:0000122	negative regulation of transcription by ...	1
GO:0000154	rRNA modification	1
GO:0000184	nuclear-transcribed mRNA catabolic proce...	1
GO:0000209	protein polyubiquitination	1
GO:0000226	microtubule cytoskeleton organization	1
GO:0000244	spliceosomal tri-snRNP complex assembly	1
GO:0000245	spliceosomal complex assembly	1
GO:0000255	allantoin metabolic process	1
GO:0000256	allantoin catabolic process	1
GO:0000266	mitochondrial fission	1
GO:0000272	polysaccharide catabolic process	1
GO:0000278	mitotic cell cycle	1
GO:0000280	nuclear division	1
GO:0000281	mitotic cytokinesis	1
GO:0000288	nuclear-transcribed mRNA catabolic proce...	1
GO:0000289	nuclear-transcribed mRNA poly(A) tail sh...	1
GO:0000290	deadenylation-dependent decapping of nuc...	1
GO:0000338	protein deneddylation	1
GO:0000350	generation of catalytic spliceosome for ...	1
GO:0000375	RNA splicing, via transesterification re...	1
GO:0000377	RNA splicing, via transesterification re...	1
GO:0000380	alternative mRNA splicing, via spliceoso...	1
GO:0000381	regulation of alternative mRNA splicing,...	1
GO:0000387	spliceosomal snRNP assembly	1
GO:0000393	spliceosomal conformational changes to g...	1
GO:0000398	mRNA splicing, via spliceosome	1
GO:0000462	maturation of SSU-rRNA from tricistronic...	1
GO:0000469	cleavage involved in rRNA processing	1
GO:0000491	small nucleolar ribonucleoprotein comple...	1
GO:0000493	box H/ACA snoRNP assembly	1
GO:0000711	meiotic DNA repair synthesis	1
GO:0000712	resolution of meiotic recombination inte...	1
GO:0000723	telomere maintenance	1
GO:0000724	double-strand break repair via homologou...	1
GO:0000725	recombinational repair	1
GO:0000731	DNA synthesis involved in DNA repair	1
GO:0000768	syncytium formation by plasma membrane f...	1
GO:0000819	sister chromatid segregation	1
GO:0000902	cell morphogenesis	1
GO:0000910	cytokinesis	1
GO:0000912	assembly of actomyosin apparatus involve...	1
GO:0000915	actomyosin contractile ring assembly	1
GO:0000921	septin ring assembly	1
GO:0000956	nuclear-transcribed mRNA catabolic proce...	1
GO:0000959	mitochondrial RNA metabolic process	1
GO:0001505	regulation of neurotransmitter levels	1
GO:0001516	prostaglandin biosynthetic process	1
GO:0001522	pseudouridine synthesis	1
GO:0001525	angiogenesis	1
GO:0001558	regulation of cell growth	1
GO:0001568	blood vessel development	1
GO:0001573	ganglioside metabolic process	1
GO:0001578	microtubule bundle formation	1
GO:0001655	urogenital system development	1
GO:0001678	cellular glucose homeostasis	1
GO:0001731	formation of translation preinitiation c...	1
GO:0001736	establishment of planar polarity	1
GO:0001738	morphogenesis of a polarized epithelium	1
GO:0001764	neuron migration	1
GO:0001765	membrane raft assembly	1
GO:0001816	cytokine production	1
GO:0001817	regulation of cytokine production	1
GO:0001822	kidney development	1
GO:0001867	complement activation, lectin pathway	1
GO:0001881	receptor recycling	1
GO:0001919	regulation of receptor recycling	1
GO:0001932	regulation of protein phosphorylation	1
GO:0001944	vasculature development	1
GO:0002009	morphogenesis of an epithelium	1
GO:0002084	protein depalmitoylation	1
GO:0002097	tRNA wobble base modification	1
GO:0002098	tRNA wobble uridine modification	1
GO:0002100	tRNA wobble adenosine to inosine editing	1
GO:0002181	cytoplasmic translation	1
GO:0002182	cytoplasmic translational elongation	1
GO:0002183	cytoplasmic translational initiation	1
GO:0002218	activation of innate immune response	1
GO:0002252	immune effector process	1
GO:0002253	activation of immune response	1
GO:0002684	positive regulation of immune system pro...	1
GO:0002790	peptide secretion	1
GO:0002791	regulation of peptide secretion	1
GO:0002831	regulation of response to biotic stimulu...	1
GO:0002833	positive regulation of response to bioti...	1
GO:0002949	tRNA threonylcarbamoyladenosine modifica...	1
GO:0003006	developmental process involved in reprod...	1
GO:0003008	system process	1
GO:0003341	cilium movement	1
GO:0003352	regulation of cilium movement	1
GO:0005975	carbohydrate metabolic process	1
GO:0005976	polysaccharide metabolic process	1
GO:0005996	monosaccharide metabolic process	1
GO:0006012	galactose metabolic process	1
GO:0006022	aminoglycan metabolic process	1
GO:0006023	aminoglycan biosynthetic process	1
GO:0006024	glycosaminoglycan biosynthetic process	1
GO:0006029	proteoglycan metabolic process	1
GO:0006066	alcohol metabolic process	1
GO:0006082	organic acid metabolic process	1
GO:0006091	generation of precursor metabolites and ...	1
GO:0006108	malate metabolic process	1
GO:0006119	oxidative phosphorylation	1
GO:0006122	mitochondrial electron transport, ubiqui...	1
GO:0006144	purine nucleobase metabolic process	1
GO:0006145	purine nucleobase catabolic process	1
GO:0006147	guanine catabolic process	1
GO:0006163	purine nucleotide metabolic process	1
GO:0006164	purine nucleotide biosynthetic process	1
GO:0006188	IMP biosynthetic process	1
GO:0006189	'de novo' IMP biosynthetic process	1
GO:0006211	5-methylcytosine catabolic process	1
GO:0006220	pyrimidine nucleotide metabolic process	1
GO:0006221	pyrimidine nucleotide biosynthetic proce...	1
GO:0006259	DNA metabolic process	1
GO:0006260	DNA replication	1
GO:0006261	DNA-dependent DNA replication	1
GO:0006270	DNA replication initiation	1
GO:0006274	DNA replication termination	1
GO:0006275	regulation of DNA replication	1
GO:0006281	DNA repair	1
GO:0006282	regulation of DNA repair	1
GO:0006284	base-excision repair	1
GO:0006302	double-strand break repair	1
GO:0006303	double-strand break repair via nonhomolo...	1
GO:0006310	DNA recombination	1
GO:0006323	DNA packaging	1
GO:0006325	chromatin organization	1
GO:0006338	chromatin remodeling	1
GO:0006352	DNA-templated transcription, initiation	1
GO:0006354	DNA-templated transcription, elongation	1
GO:0006355	regulation of transcription, DNA-templat...	1
GO:0006357	regulation of transcription by RNA polym...	1
GO:0006359	regulation of transcription by RNA polym...	1
GO:0006360	transcription by RNA polymerase I	1
GO:0006364	rRNA processing	1
GO:0006366	transcription by RNA polymerase II	1
GO:0006367	transcription initiation from RNA polyme...	1
GO:0006368	transcription elongation from RNA polyme...	1
GO:0006382	adenosine to inosine editing	1
GO:0006383	transcription by RNA polymerase III	1
GO:0006390	mitochondrial transcription	1
GO:0006392	transcription elongation from mitochondr...	1
GO:0006397	mRNA processing	1
GO:0006400	tRNA modification	1
GO:0006401	RNA catabolic process	1
GO:0006402	mRNA catabolic process	1
GO:0006403	RNA localization	1
GO:0006405	RNA export from nucleus	1
GO:0006406	mRNA export from nucleus	1
GO:0006408	snRNA export from nucleus	1
GO:0006412	translation	1
GO:0006413	translational initiation	1
GO:0006414	translational elongation	1
GO:0006417	regulation of translation	1
GO:0006418	tRNA aminoacylation for protein translat...	1
GO:0006419	alanyl-tRNA aminoacylation	1
GO:0006430	lysyl-tRNA aminoacylation	1
GO:0006448	regulation of translational elongation	1
GO:0006450	regulation of translational fidelity	1
GO:0006457	protein folding	1
GO:0006468	protein phosphorylation	1
GO:0006470	protein dephosphorylation	1
GO:0006473	protein acetylation	1
GO:0006474	N-terminal protein amino acid acetylatio...	1
GO:0006475	internal protein amino acid acetylation	1
GO:0006477	protein sulfation	1
GO:0006478	peptidyl-tyrosine sulfation	1
GO:0006479	protein methylation	1
GO:0006480	N-terminal protein amino acid methylatio...	1
GO:0006482	protein demethylation	1
GO:0006486	protein glycosylation	1
GO:0006487	protein N-linked glycosylation	1
GO:0006488	dolichol-linked oligosaccharide biosynth...	1
GO:0006490	oligosaccharide-lipid intermediate biosy...	1
GO:0006491	N-glycan processing	1
GO:0006493	protein O-linked glycosylation	1
GO:0006497	protein lipidation	1
GO:0006505	GPI anchor metabolic process	1
GO:0006506	GPI anchor biosynthetic process	1
GO:0006511	ubiquitin-dependent protein catabolic pr...	1
GO:0006520	cellular amino acid metabolic process	1
GO:0006536	glutamate metabolic process	1
GO:0006537	glutamate biosynthetic process	1
GO:0006575	cellular modified amino acid metabolic p...	1
GO:0006576	cellular biogenic amine metabolic proces...	1
GO:0006595	polyamine metabolic process	1
GO:0006596	polyamine biosynthetic process	1
GO:0006597	spermine biosynthetic process	1
GO:0006606	protein import into nucleus	1
GO:0006611	protein export from nucleus	1
GO:0006612	protein targeting to membrane	1
GO:0006613	cotranslational protein targeting to mem...	1
GO:0006614	SRP-dependent cotranslational protein ta...	1
GO:0006616	SRP-dependent cotranslational protein ta...	1
GO:0006620	posttranslational protein targeting to e...	1
GO:0006621	protein retention in ER lumen	1
GO:0006623	protein targeting to vacuole	1
GO:0006629	lipid metabolic process	1
GO:0006631	fatty acid metabolic process	1
GO:0006633	fatty acid biosynthetic process	1
GO:0006636	unsaturated fatty acid biosynthetic proc...	1
GO:0006637	acyl-CoA metabolic process	1
GO:0006643	membrane lipid metabolic process	1
GO:0006644	phospholipid metabolic process	1
GO:0006650	glycerophospholipid metabolic process	1
GO:0006656	phosphatidylcholine biosynthetic process	1
GO:0006658	phosphatidylserine metabolic process	1
GO:0006659	phosphatidylserine biosynthetic process	1
GO:0006661	phosphatidylinositol biosynthetic proces...	1
GO:0006664	glycolipid metabolic process	1
GO:0006665	sphingolipid metabolic process	1
GO:0006672	ceramide metabolic process	1
GO:0006687	glycosphingolipid metabolic process	1
GO:0006689	ganglioside catabolic process	1
GO:0006690	icosanoid metabolic process	1
GO:0006691	leukotriene metabolic process	1
GO:0006692	prostanoid metabolic process	1
GO:0006693	prostaglandin metabolic process	1
GO:0006720	isoprenoid metabolic process	1
GO:0006729	tetrahydrobiopterin biosynthetic process	1
GO:0006739	NADP metabolic process	1
GO:0006742	NADP catabolic process	1
GO:0006743	ubiquinone metabolic process	1
GO:0006744	ubiquinone biosynthetic process	1
GO:0006749	glutathione metabolic process	1
GO:0006750	glutathione biosynthetic process	1
GO:0006751	glutathione catabolic process	1
GO:0006753	nucleoside phosphate metabolic process	1
GO:0006754	ATP biosynthetic process	1
GO:0006766	vitamin metabolic process	1
GO:0006767	water-soluble vitamin metabolic process	1
GO:0006778	porphyrin-containing compound metabolic ...	1
GO:0006779	porphyrin-containing compound biosynthet...	1
GO:0006783	heme biosynthetic process	1
GO:0006784	heme A biosynthetic process	1
GO:0006790	sulfur compound metabolic process	1
GO:0006801	superoxide metabolic process	1
GO:0006813	potassium ion transport	1
GO:0006814	sodium ion transport	1
GO:0006816	calcium ion transport	1
GO:0006826	iron ion transport	1
GO:0006836	neurotransmitter transport	1
GO:0006839	mitochondrial transport	1
GO:0006851	mitochondrial calcium ion transmembrane ...	1
GO:0006869	lipid transport	1
GO:0006873	cellular ion homeostasis	1
GO:0006874	cellular calcium ion homeostasis	1
GO:0006875	cellular metal ion homeostasis	1
GO:0006887	exocytosis	1
GO:0006888	endoplasmic reticulum to Golgi vesicle-m...	1
GO:0006890	retrograde vesicle-mediated transport, G...	1
GO:0006891	intra-Golgi vesicle-mediated transport	1
GO:0006892	post-Golgi vesicle-mediated transport	1
GO:0006895	Golgi to endosome transport	1
GO:0006897	endocytosis	1
GO:0006904	vesicle docking involved in exocytosis	1
GO:0006913	nucleocytoplasmic transport	1
GO:0006914	autophagy	1
GO:0006915	apoptotic process	1
GO:0006928	movement of cell or subcellular componen...	1
GO:0006949	syncytium formation	1
GO:0006950	response to stress	1
GO:0006952	defense response	1
GO:0006956	complement activation	1
GO:0006959	humoral immune response	1
GO:0006974	cellular response to DNA damage stimulus	1
GO:0006979	response to oxidative stress	1
GO:0006986	response to unfolded protein	1
GO:0006996	organelle organization	1
GO:0006997	nucleus organization	1
GO:0007005	mitochondrion organization	1
GO:0007009	plasma membrane organization	1
GO:0007010	cytoskeleton organization	1
GO:0007015	actin filament organization	1
GO:0007017	microtubule-based process	1
GO:0007018	microtubule-based movement	1
GO:0007021	tubulin complex assembly	1
GO:0007023	post-chaperonin tubulin folding pathway	1
GO:0007029	endoplasmic reticulum organization	1
GO:0007030	Golgi organization	1
GO:0007033	vacuole organization	1
GO:0007034	vacuolar transport	1
GO:0007041	lysosomal transport	1
GO:0007049	cell cycle	1
GO:0007051	spindle organization	1
GO:0007052	mitotic spindle organization	1
GO:0007059	chromosome segregation	1
GO:0007062	sister chromatid cohesion	1
GO:0007064	mitotic sister chromatid cohesion	1
GO:0007076	mitotic chromosome condensation	1
GO:0007093	mitotic cell cycle checkpoint signaling	1
GO:0007098	centrosome cycle	1
GO:0007099	centriole replication	1
GO:0007127	meiosis I	1
GO:0007129	homologous chromosome pairing at meiosis	1
GO:0007131	reciprocal meiotic recombination	1
GO:0007155	cell adhesion	1
GO:0007157	heterophilic cell-cell adhesion via plas...	1
GO:0007160	cell-matrix adhesion	1
GO:0007164	establishment of tissue polarity	1
GO:0007166	cell surface receptor signaling pathway	1
GO:0007167	enzyme linked receptor protein signaling...	1
GO:0007178	transmembrane receptor protein serine/th...	1
GO:0007179	transforming growth factor beta receptor...	1
GO:0007186	G protein-coupled receptor signaling pat...	1
GO:0007213	G protein-coupled acetylcholine receptor...	1
GO:0007218	neuropeptide signaling pathway	1
GO:0007219	Notch signaling pathway	1
GO:0007224	smoothened signaling pathway	1
GO:0007229	integrin-mediated signaling pathway	1
GO:0007249	I-kappaB kinase/NF-kappaB signaling	1
GO:0007264	small GTPase mediated signal transductio...	1
GO:0007265	Ras protein signal transduction	1
GO:0007266	Rho protein signal transduction	1
GO:0007267	cell-cell signaling	1
GO:0007268	chemical synaptic transmission	1
GO:0007269	neurotransmitter secretion	1
GO:0007275	multicellular organism development	1
GO:0007276	gamete generation	1
GO:0007283	spermatogenesis	1
GO:0007338	single fertilization	1
GO:0007340	acrosome reaction	1
GO:0007346	regulation of mitotic cell cycle	1
GO:0007399	nervous system development	1
GO:0007517	muscle organ development	1
GO:0007520	myoblast fusion	1
GO:0007596	blood coagulation	1
GO:0007599	hemostasis	1
GO:0007600	sensory perception	1
GO:0007601	visual perception	1
GO:0007605	sensory perception of sound	1
GO:0007623	circadian rhythm	1
GO:0008053	mitochondrial fusion	1
GO:0008064	regulation of actin polymerization or de...	1
GO:0008154	actin polymerization or depolymerization	1
GO:0008202	steroid metabolic process	1
GO:0008203	cholesterol metabolic process	1
GO:0008213	protein alkylation	1
GO:0008214	protein dealkylation	1
GO:0008215	spermine metabolic process	1
GO:0008219	cell death	1
GO:0008283	cell population proliferation	1
GO:0008285	negative regulation of cell population p...	1
GO:0008299	isoprenoid biosynthetic process	1
GO:0008608	attachment of spindle microtubules to ki...	1
GO:0008610	lipid biosynthetic process	1
GO:0008612	peptidyl-lysine modification to peptidyl...	1
GO:0008643	carbohydrate transport	1
GO:0008652	cellular amino acid biosynthetic process	1
GO:0008654	phospholipid biosynthetic process	1
GO:0009056	catabolic process	1
GO:0009057	macromolecule catabolic process	1
GO:0009060	aerobic respiration	1
GO:0009064	glutamine family amino acid metabolic pr...	1
GO:0009084	glutamine family amino acid biosynthetic...	1
GO:0009100	glycoprotein metabolic process	1
GO:0009101	glycoprotein biosynthetic process	1
GO:0009110	vitamin biosynthetic process	1
GO:0009112	nucleobase metabolic process	1
GO:0009116	nucleoside metabolic process	1
GO:0009117	nucleotide metabolic process	1
GO:0009123	nucleoside monophosphate metabolic proce...	1
GO:0009124	nucleoside monophosphate biosynthetic pr...	1
GO:0009126	purine nucleoside monophosphate metaboli...	1
GO:0009127	purine nucleoside monophosphate biosynth...	1
GO:0009141	nucleoside triphosphate metabolic proces...	1
GO:0009142	nucleoside triphosphate biosynthetic pro...	1
GO:0009143	nucleoside triphosphate catabolic proces...	1
GO:0009144	purine nucleoside triphosphate metabolic...	1
GO:0009145	purine nucleoside triphosphate biosynthe...	1
GO:0009150	purine ribonucleotide metabolic process	1
GO:0009152	purine ribonucleotide biosynthetic proce...	1
GO:0009156	ribonucleoside monophosphate biosyntheti...	1
GO:0009161	ribonucleoside monophosphate metabolic p...	1
GO:0009165	nucleotide biosynthetic process	1
GO:0009166	nucleotide catabolic process	1
GO:0009167	purine ribonucleoside monophosphate meta...	1
GO:0009168	purine ribonucleoside monophosphate bios...	1
GO:0009187	cyclic nucleotide metabolic process	1
GO:0009190	cyclic nucleotide biosynthetic process	1
GO:0009199	ribonucleoside triphosphate metabolic pr...	1
GO:0009201	ribonucleoside triphosphate biosynthetic...	1
GO:0009205	purine ribonucleoside triphosphate metab...	1
GO:0009206	purine ribonucleoside triphosphate biosy...	1
GO:0009235	cobalamin metabolic process	1
GO:0009247	glycolipid biosynthetic process	1
GO:0009259	ribonucleotide metabolic process	1
GO:0009260	ribonucleotide biosynthetic process	1
GO:0009306	protein secretion	1
GO:0009308	amine metabolic process	1
GO:0009309	amine biosynthetic process	1
GO:0009314	response to radiation	1
GO:0009411	response to UV	1
GO:0009416	response to light stimulus	1
GO:0009566	fertilization	1
GO:0009605	response to external stimulus	1
GO:0009607	response to biotic stimulus	1
GO:0009611	response to wounding	1
GO:0009617	response to bacterium	1
GO:0009628	response to abiotic stimulus	1
GO:0009653	anatomical structure morphogenesis	1
GO:0009719	response to endogenous stimulus	1
GO:0009725	response to hormone	1
GO:0009743	response to carbohydrate	1
GO:0009746	response to hexose	1
GO:0009749	response to glucose	1
GO:0009755	hormone-mediated signaling pathway	1
GO:0009790	embryo development	1
GO:0009888	tissue development	1
GO:0009889	regulation of biosynthetic process	1
GO:0009890	negative regulation of biosynthetic proc...	1
GO:0009891	positive regulation of biosynthetic proc...	1
GO:0009892	negative regulation of metabolic process	1
GO:0009893	positive regulation of metabolic process	1
GO:0009894	regulation of catabolic process	1
GO:0009896	positive regulation of catabolic process	1
GO:0009914	hormone transport	1
GO:0009966	regulation of signal transduction	1
GO:0009967	positive regulation of signal transducti...	1
GO:0009968	negative regulation of signal transducti...	1
GO:0010033	response to organic substance	1
GO:0010035	response to inorganic substance	1
GO:0010038	response to metal ion	1
GO:0010243	response to organonitrogen compound	1
GO:0010256	endomembrane system organization	1
GO:0010257	NADH dehydrogenase complex assembly	1
GO:0010265	SCF complex assembly	1
GO:0010389	regulation of G2/M transition of mitotic...	1
GO:0010452	histone H3-K36 methylation	1
GO:0010468	regulation of gene expression	1
GO:0010498	proteasomal protein catabolic process	1
GO:0010506	regulation of autophagy	1
GO:0010556	regulation of macromolecule biosynthetic...	1
GO:0010557	positive regulation of macromolecule bio...	1
GO:0010558	negative regulation of macromolecule bio...	1
GO:0010562	positive regulation of phosphorus metabo...	1
GO:0010563	negative regulation of phosphorus metabo...	1
GO:0010564	regulation of cell cycle process	1
GO:0010604	positive regulation of macromolecule met...	1
GO:0010605	negative regulation of macromolecule met...	1
GO:0010608	posttranscriptional regulation of gene e...	1
GO:0010629	negative regulation of gene expression	1
GO:0010638	positive regulation of organelle organiz...	1
GO:0010639	negative regulation of organelle organiz...	1
GO:0010646	regulation of cell communication	1
GO:0010647	positive regulation of cell communicatio...	1
GO:0010648	negative regulation of cell communicatio...	1
GO:0010817	regulation of hormone levels	1
GO:0010824	regulation of centrosome duplication	1
GO:0010826	negative regulation of centrosome duplic...	1
GO:0010876	lipid localization	1
GO:0010921	regulation of phosphatase activity	1
GO:0010923	negative regulation of phosphatase activ...	1
GO:0010941	regulation of cell death	1
GO:0010948	negative regulation of cell cycle proces...	1
GO:0010970	transport along microtubule	1
GO:0010972	negative regulation of G2/M transition o...	1
GO:0012501	programmed cell death	1
GO:0014070	response to organic cyclic compound	1
GO:0014902	myotube differentiation	1
GO:0015012	heparan sulfate proteoglycan biosyntheti...	1
GO:0015074	DNA integration	1
GO:0015748	organophosphate ester transport	1
GO:0015833	peptide transport	1
GO:0015850	organic hydroxy compound transport	1
GO:0015889	cobalamin transport	1
GO:0015914	phospholipid transport	1
GO:0015918	sterol transport	1
GO:0015931	nucleobase-containing compound transport	1
GO:0015980	energy derivation by oxidation of organi...	1
GO:0015985	energy coupled proton transport, down el...	1
GO:0015986	ATP synthesis coupled proton transport	1
GO:0016032	viral process	1
GO:0016042	lipid catabolic process	1
GO:0016043	cellular component organization	1
GO:0016049	cell growth	1
GO:0016052	carbohydrate catabolic process	1
GO:0016053	organic acid biosynthetic process	1
GO:0016055	Wnt signaling pathway	1
GO:0016071	mRNA metabolic process	1
GO:0016072	rRNA metabolic process	1
GO:0016079	synaptic vesicle exocytosis	1
GO:0016093	polyprenol metabolic process	1
GO:0016125	sterol metabolic process	1
GO:0016236	macroautophagy	1
GO:0016255	attachment of GPI anchor to protein	1
GO:0016310	phosphorylation	1
GO:0016311	dephosphorylation	1
GO:0016441	posttranscriptional gene silencing	1
GO:0016458	gene silencing	1
GO:0016477	cell migration	1
GO:0016480	negative regulation of transcription by ...	1
GO:0016482	cytosolic transport	1
GO:0016553	base conversion or substitution editing	1
GO:0016567	protein ubiquitination	1
GO:0016570	histone modification	1
GO:0016571	histone methylation	1
GO:0016573	histone acetylation	1
GO:0016598	protein arginylation	1
GO:0017004	cytochrome complex assembly	1
GO:0017015	regulation of transforming growth factor...	1
GO:0017038	protein import	1
GO:0017062	respiratory chain complex III assembly	1
GO:0017121	plasma membrane phospholipid scrambling	1
GO:0017148	negative regulation of translation	1
GO:0017182	peptidyl-diphthamide metabolic process	1
GO:0017183	peptidyl-diphthamide biosynthetic proces...	1
GO:0017196	N-terminal peptidyl-methionine acetylati...	1
GO:0018022	peptidyl-lysine methylation	1
GO:0018023	peptidyl-lysine trimethylation	1
GO:0018095	protein polyglutamylation	1
GO:0018149	peptide cross-linking	1
GO:0018200	peptidyl-glutamic acid modification	1
GO:0018202	peptidyl-histidine modification	1
GO:0018205	peptidyl-lysine modification	1
GO:0018206	peptidyl-methionine modification	1
GO:0018212	peptidyl-tyrosine modification	1
GO:0018393	internal peptidyl-lysine acetylation	1
GO:0018394	peptidyl-lysine acetylation	1
GO:0019058	viral life cycle	1
GO:0019062	virion attachment to host cell	1
GO:0019184	nonribosomal peptide biosynthetic proces...	1
GO:0019219	regulation of nucleobase-containing comp...	1
GO:0019220	regulation of phosphate metabolic proces...	1
GO:0019222	regulation of metabolic process	1
GO:0019318	hexose metabolic process	1
GO:0019348	dolichol metabolic process	1
GO:0019362	pyridine nucleotide metabolic process	1
GO:0019364	pyridine nucleotide catabolic process	1
GO:0019377	glycolipid catabolic process	1
GO:0019439	aromatic compound catabolic process	1
GO:0019646	aerobic electron transport chain	1
GO:0019693	ribose phosphate metabolic process	1
GO:0019722	calcium-mediated signaling	1
GO:0019751	polyol metabolic process	1
GO:0019752	carboxylic acid metabolic process	1
GO:0019857	5-methylcytosine metabolic process	1
GO:0019915	lipid storage	1
GO:0019932	second-messenger-mediated signaling	1
GO:0019941	modification-dependent protein catabolic...	1
GO:0019953	sexual reproduction	1
GO:0022008	neurogenesis	1
GO:0022402	cell cycle process	1
GO:0022406	membrane docking	1
GO:0022411	cellular component disassembly	1
GO:0022414	reproductive process	1
GO:0022607	cellular component assembly	1
GO:0022610	biological adhesion	1
GO:0022618	ribonucleoprotein complex assembly	1
GO:0022900	electron transport chain	1
GO:0022904	respiratory electron transport chain	1
GO:0023051	regulation of signaling	1
GO:0023056	positive regulation of signaling	1
GO:0023057	negative regulation of signaling	1
GO:0023061	signal release	1
GO:0030001	metal ion transport	1
GO:0030003	cellular cation homeostasis	1
GO:0030029	actin filament-based process	1
GO:0030030	cell projection organization	1
GO:0030031	cell projection assembly	1
GO:0030036	actin cytoskeleton organization	1
GO:0030041	actin filament polymerization	1
GO:0030042	actin filament depolymerization	1
GO:0030072	peptide hormone secretion	1
GO:0030073	insulin secretion	1
GO:0030111	regulation of Wnt signaling pathway	1
GO:0030149	sphingolipid catabolic process	1
GO:0030154	cell differentiation	1
GO:0030162	regulation of proteolysis	1
GO:0030163	protein catabolic process	1
GO:0030166	proteoglycan biosynthetic process	1
GO:0030177	positive regulation of Wnt signaling pat...	1
GO:0030193	regulation of blood coagulation	1
GO:0030194	positive regulation of blood coagulation	1
GO:0030201	heparan sulfate proteoglycan metabolic p...	1
GO:0030203	glycosaminoglycan metabolic process	1
GO:0030258	lipid modification	1
GO:0030261	chromosome condensation	1
GO:0030431	sleep	1
GO:0030488	tRNA methylation	1
GO:0030490	maturation of SSU-rRNA	1
GO:0030509	BMP signaling pathway	1
GO:0030510	regulation of BMP signaling pathway	1
GO:0030512	negative regulation of transforming grow...	1
GO:0030514	negative regulation of BMP signaling pat...	1
GO:0030518	intracellular steroid hormone receptor s...	1
GO:0030522	intracellular receptor signaling pathway	1
GO:0030575	nuclear body organization	1
GO:0030576	Cajal body organization	1
GO:0030705	cytoskeleton-dependent intracellular tra...	1
GO:0030832	regulation of actin filament length	1
GO:0030833	regulation of actin filament polymerizat...	1
GO:0030834	regulation of actin filament depolymeriz...	1
GO:0030835	negative regulation of actin filament de...	1
GO:0030837	negative regulation of actin filament po...	1
GO:0030838	positive regulation of actin filament po...	1
GO:0030865	cortical cytoskeleton organization	1
GO:0030866	cortical actin cytoskeleton organization	1
GO:0031023	microtubule organizing center organizati...	1
GO:0031032	actomyosin structure organization	1
GO:0031047	gene silencing by RNA	1
GO:0031106	septin ring organization	1
GO:0031109	microtubule polymerization or depolymeri...	1
GO:0031110	regulation of microtubule polymerization...	1
GO:0031124	mRNA 3'-end processing	1
GO:0031204	posttranslational protein targeting to m...	1
GO:0031323	regulation of cellular metabolic process	1
GO:0031324	negative regulation of cellular metaboli...	1
GO:0031325	positive regulation of cellular metaboli...	1
GO:0031326	regulation of cellular biosynthetic proc...	1
GO:0031327	negative regulation of cellular biosynth...	1
GO:0031328	positive regulation of cellular biosynth...	1
GO:0031329	regulation of cellular catabolic process	1
GO:0031331	positive regulation of cellular cataboli...	1
GO:0031333	negative regulation of protein-containin...	1
GO:0031334	positive regulation of protein-containin...	1
GO:0031347	regulation of defense response	1
GO:0031349	positive regulation of defense response	1
GO:0031365	N-terminal protein amino acid modificati...	1
GO:0031396	regulation of protein ubiquitination	1
GO:0031399	regulation of protein modification proce...	1
GO:0031401	positive regulation of protein modificat...	1
GO:0031503	protein-containing complex localization	1
GO:0031570	DNA integrity checkpoint signaling	1
GO:0031579	membrane raft organization	1
GO:0031589	cell-substrate adhesion	1
GO:0031929	TOR signaling	1
GO:0032006	regulation of TOR signaling	1
GO:0032007	negative regulation of TOR signaling	1
GO:0032008	positive regulation of TOR signaling	1
GO:0032101	regulation of response to external stimu...	1
GO:0032103	positive regulation of response to exter...	1
GO:0032185	septin cytoskeleton organization	1
GO:0032200	telomere organization	1
GO:0032228	regulation of synaptic transmission, GAB...	1
GO:0032268	regulation of cellular protein metabolic...	1
GO:0032269	negative regulation of cellular protein ...	1
GO:0032270	positive regulation of cellular protein ...	1
GO:0032271	regulation of protein polymerization	1
GO:0032272	negative regulation of protein polymeriz...	1
GO:0032273	positive regulation of protein polymeriz...	1
GO:0032324	molybdopterin cofactor biosynthetic proc...	1
GO:0032365	intracellular lipid transport	1
GO:0032366	intracellular sterol transport	1
GO:0032418	lysosome localization	1
GO:0032434	regulation of proteasomal ubiquitin-depe...	1
GO:0032446	protein modification by small protein co...	1
GO:0032501	multicellular organismal process	1
GO:0032502	developmental process	1
GO:0032504	multicellular organism reproduction	1
GO:0032506	cytokinetic process	1
GO:0032507	maintenance of protein location in cell	1
GO:0032535	regulation of cellular component size	1
GO:0032787	monocarboxylic acid metabolic process	1
GO:0032870	cellular response to hormone stimulus	1
GO:0032879	regulation of localization	1
GO:0032880	regulation of protein localization	1
GO:0032886	regulation of microtubule-based process	1
GO:0032940	secretion by cell	1
GO:0032954	regulation of cytokinetic process	1
GO:0032956	regulation of actin cytoskeleton organiz...	1
GO:0032970	regulation of actin filament-based proce...	1
GO:0032981	mitochondrial respiratory chain complex ...	1
GO:0032984	protein-containing complex disassembly	1
GO:0033013	tetrapyrrole metabolic process	1
GO:0033014	tetrapyrrole biosynthetic process	1
GO:0033043	regulation of organelle organization	1
GO:0033108	mitochondrial respiratory chain complex ...	1
GO:0033260	nuclear DNA replication	1
GO:0033365	protein localization to organelle	1
GO:0033500	carbohydrate homeostasis	1
GO:0033554	cellular response to stress	1
GO:0033559	unsaturated fatty acid metabolic process	1
GO:0033750	ribosome localization	1
GO:0033865	nucleoside bisphosphate metabolic proces...	1
GO:0033875	ribonucleoside bisphosphate metabolic pr...	1
GO:0033993	response to lipid	1
GO:0034032	purine nucleoside bisphosphate metabolic...	1
GO:0034204	lipid translocation	1
GO:0034220	ion transmembrane transport	1
GO:0034248	regulation of cellular amide metabolic p...	1
GO:0034249	negative regulation of cellular amide me...	1
GO:0034284	response to monosaccharide	1
GO:0034311	diol metabolic process	1
GO:0034312	diol biosynthetic process	1
GO:0034314	Arp2/3 complex-mediated actin nucleation	1
GO:0034315	regulation of Arp2/3 complex-mediated ac...	1
GO:0034504	protein localization to nucleus	1
GO:0034551	mitochondrial respiratory chain complex ...	1
GO:0034622	cellular protein-containing complex asse...	1
GO:0034655	nucleobase-containing compound catabolic...	1
GO:0034968	histone lysine methylation	1
GO:0035023	regulation of Rho protein signal transdu...	1
GO:0035075	response to ecdysone	1
GO:0035076	ecdysone receptor-mediated signaling pat...	1
GO:0035082	axoneme assembly	1
GO:0035194	post-transcriptional gene silencing by R...	1
GO:0035195	gene silencing by miRNA	1
GO:0035239	tube morphogenesis	1
GO:0035278	miRNA mediated inhibition of translation	1
GO:0035295	tube development	1
GO:0035303	regulation of dephosphorylation	1
GO:0035304	regulation of protein dephosphorylation	1
GO:0035305	negative regulation of dephosphorylation	1
GO:0035306	positive regulation of dephosphorylation	1
GO:0035307	positive regulation of protein dephospho...	1
GO:0035383	thioester metabolic process	1
GO:0035437	maintenance of protein localization in e...	1
GO:0035592	establishment of protein localization to...	1
GO:0035601	protein deacylation	1
GO:0035735	intraciliary transport involved in ciliu...	1
GO:0035825	homologous recombination	1
GO:0035966	response to topologically incorrect prot...	1
GO:0036297	interstrand cross-link repair	1
GO:0036314	response to sterol	1
GO:0036315	cellular response to sterol	1
GO:0036444	calcium import into the mitochondrion	1
GO:0038061	NIK/NF-kappaB signaling	1
GO:0038166	angiotensin-activated signaling pathway	1
GO:0040007	growth	1
GO:0040008	regulation of growth	1
GO:0040011	locomotion	1
GO:0040012	regulation of locomotion	1
GO:0040033	negative regulation of translation, ncRN...	1
GO:0042060	wound healing	1
GO:0042073	intraciliary transport	1
GO:0042127	regulation of cell population proliferat...	1
GO:0042147	retrograde transport, endosome to Golgi	1
GO:0042157	lipoprotein metabolic process	1
GO:0042158	lipoprotein biosynthetic process	1
GO:0042159	lipoprotein catabolic process	1
GO:0042168	heme metabolic process	1
GO:0042176	regulation of protein catabolic process	1
GO:0042180	cellular ketone metabolic process	1
GO:0042181	ketone biosynthetic process	1
GO:0042219	cellular modified amino acid catabolic p...	1
GO:0042221	response to chemical	1
GO:0042255	ribosome assembly	1
GO:0042256	mature ribosome assembly	1
GO:0042273	ribosomal large subunit biogenesis	1
GO:0042274	ribosomal small subunit biogenesis	1
GO:0042325	regulation of phosphorylation	1
GO:0042364	water-soluble vitamin biosynthetic proce...	1
GO:0042398	cellular modified amino acid biosyntheti...	1
GO:0042401	cellular biogenic amine biosynthetic pro...	1
GO:0042440	pigment metabolic process	1
GO:0042558	pteridine-containing compound metabolic ...	1
GO:0042559	pteridine-containing compound biosynthet...	1
GO:0042593	glucose homeostasis	1
GO:0042692	muscle cell differentiation	1
GO:0042742	defense response to bacterium	1
GO:0042752	regulation of circadian rhythm	1
GO:0042754	negative regulation of circadian rhythm	1
GO:0042770	signal transduction in response to DNA d...	1
GO:0042773	ATP synthesis coupled electron transport	1
GO:0042775	mitochondrial ATP synthesis coupled elec...	1
GO:0042816	vitamin B6 metabolic process	1
GO:0042819	vitamin B6 biosynthetic process	1
GO:0042886	amide transport	1
GO:0042981	regulation of apoptotic process	1
GO:0043038	amino acid activation	1
GO:0043039	tRNA aminoacylation	1
GO:0043043	peptide biosynthetic process	1
GO:0043062	extracellular structure organization	1
GO:0043063	intercellular bridge organization	1
GO:0043066	negative regulation of apoptotic process	1
GO:0043067	regulation of programmed cell death	1
GO:0043069	negative regulation of programmed cell d...	1
GO:0043086	negative regulation of catalytic activit...	1
GO:0043087	regulation of GTPase activity	1
GO:0043112	receptor metabolic process	1
GO:0043122	regulation of I-kappaB kinase/NF-kappaB ...	1
GO:0043123	positive regulation of I-kappaB kinase/N...	1
GO:0043161	proteasome-mediated ubiquitin-dependent ...	1
GO:0043171	peptide catabolic process	1
GO:0043207	response to external biotic stimulus	1
GO:0043242	negative regulation of protein-containin...	1
GO:0043244	regulation of protein-containing complex...	1
GO:0043248	proteasome assembly	1
GO:0043254	regulation of protein-containing complex...	1
GO:0043401	steroid hormone mediated signaling pathw...	1
GO:0043413	macromolecule glycosylation	1
GO:0043434	response to peptide hormone	1
GO:0043436	oxoacid metabolic process	1
GO:0043461	proton-transporting ATP synthase complex...	1
GO:0043484	regulation of RNA splicing	1
GO:0043487	regulation of RNA stability	1
GO:0043488	regulation of mRNA stability	1
GO:0043543	protein acylation	1
GO:0043549	regulation of kinase activity	1
GO:0043550	regulation of lipid kinase activity	1
GO:0043551	regulation of phosphatidylinositol 3-kin...	1
GO:0043604	amide biosynthetic process	1
GO:0043605	cellular amide catabolic process	1
GO:0043624	cellular protein complex disassembly	1
GO:0043632	modification-dependent macromolecule cat...	1
GO:0043648	dicarboxylic acid metabolic process	1
GO:0043650	dicarboxylic acid biosynthetic process	1
GO:0043666	regulation of phosphoprotein phosphatase...	1
GO:0043933	protein-containing complex subunit organ...	1
GO:0043967	histone H4 acetylation	1
GO:0043984	histone H4-K16 acetylation	1
GO:0044087	regulation of cellular component biogene...	1
GO:0044089	positive regulation of cellular componen...	1
GO:0044091	membrane biogenesis	1
GO:0044092	negative regulation of molecular functio...	1
GO:0044106	cellular amine metabolic process	1
GO:0044242	cellular lipid catabolic process	1
GO:0044248	cellular catabolic process	1
GO:0044255	cellular lipid metabolic process	1
GO:0044257	cellular protein catabolic process	1
GO:0044265	cellular macromolecule catabolic process	1
GO:0044270	cellular nitrogen compound catabolic pro...	1
GO:0044272	sulfur compound biosynthetic process	1
GO:0044273	sulfur compound catabolic process	1
GO:0044281	small molecule metabolic process	1
GO:0044283	small molecule biosynthetic process	1
GO:0044403	biological process involved in symbiotic...	1
GO:0044406	adhesion of symbiont to host	1
GO:0044419	biological process involved in interspec...	1
GO:0044650	adhesion of symbiont to host cell	1
GO:0044703	multi-organism reproductive process	1
GO:0044770	cell cycle phase transition	1
GO:0044772	mitotic cell cycle phase transition	1
GO:0044782	cilium organization	1
GO:0044786	cell cycle DNA replication	1
GO:0044837	actomyosin contractile ring organization	1
GO:0044839	cell cycle G2/M phase transition	1
GO:0044854	plasma membrane raft assembly	1
GO:0044857	plasma membrane raft organization	1
GO:0045010	actin nucleation	1
GO:0045017	glycerolipid biosynthetic process	1
GO:0045047	protein targeting to ER	1
GO:0045048	protein insertion into ER membrane	1
GO:0045055	regulated exocytosis	1
GO:0045087	innate immune response	1
GO:0045088	regulation of innate immune response	1
GO:0045089	positive regulation of innate immune res...	1
GO:0045103	intermediate filament-based process	1
GO:0045104	intermediate filament cytoskeleton organ...	1
GO:0045132	meiotic chromosome segregation	1
GO:0045143	homologous chromosome segregation	1
GO:0045185	maintenance of protein location	1
GO:0045332	phospholipid translocation	1
GO:0045333	cellular respiration	1
GO:0045739	positive regulation of DNA repair	1
GO:0045786	negative regulation of cell cycle	1
GO:0045859	regulation of protein kinase activity	1
GO:0045892	negative regulation of transcription, DN...	1
GO:0045893	positive regulation of transcription, DN...	1
GO:0045930	negative regulation of mitotic cell cycl...	1
GO:0045934	negative regulation of nucleobase-contai...	1
GO:0045935	positive regulation of nucleobase-contai...	1
GO:0045936	negative regulation of phosphate metabol...	1
GO:0045937	positive regulation of phosphate metabol...	1
GO:0045974	regulation of translation, ncRNA-mediate...	1
GO:0046034	ATP metabolic process	1
GO:0046040	IMP metabolic process	1
GO:0046098	guanine metabolic process	1
GO:0046113	nucleobase catabolic process	1
GO:0046146	tetrahydrobiopterin metabolic process	1
GO:0046148	pigment biosynthetic process	1
GO:0046160	heme a metabolic process	1
GO:0046165	alcohol biosynthetic process	1
GO:0046173	polyol biosynthetic process	1
GO:0046390	ribose phosphate biosynthetic process	1
GO:0046394	carboxylic acid biosynthetic process	1
GO:0046434	organophosphate catabolic process	1
GO:0046456	icosanoid biosynthetic process	1
GO:0046457	prostanoid biosynthetic process	1
GO:0046466	membrane lipid catabolic process	1
GO:0046467	membrane lipid biosynthetic process	1
GO:0046470	phosphatidylcholine metabolic process	1
GO:0046474	glycerophospholipid biosynthetic process	1
GO:0046479	glycosphingolipid catabolic process	1
GO:0046486	glycerolipid metabolic process	1
GO:0046488	phosphatidylinositol metabolic process	1
GO:0046496	nicotinamide nucleotide metabolic proces...	1
GO:0046514	ceramide catabolic process	1
GO:0046578	regulation of Ras protein signal transdu...	1
GO:0046605	regulation of centrosome cycle	1
GO:0046606	negative regulation of centrosome cycle	1
GO:0046700	heterocycle catabolic process	1
GO:0046839	phospholipid dephosphorylation	1
GO:0046854	phosphatidylinositol phosphate biosynthe...	1
GO:0046856	phosphatidylinositol dephosphorylation	1
GO:0046879	hormone secretion	1
GO:0046883	regulation of hormone secretion	1
GO:0046903	secretion	1
GO:0048024	regulation of mRNA splicing, via spliceo...	1
GO:0048167	regulation of synaptic plasticity	1
GO:0048168	regulation of neuronal synaptic plastici...	1
GO:0048193	Golgi vesicle transport	1
GO:0048232	male gamete generation	1
GO:0048278	vesicle docking	1
GO:0048284	organelle fusion	1
GO:0048285	organelle fission	1
GO:0048511	rhythmic process	1
GO:0048513	animal organ development	1
GO:0048514	blood vessel morphogenesis	1
GO:0048518	positive regulation of biological proces...	1
GO:0048519	negative regulation of biological proces...	1
GO:0048522	positive regulation of cellular process	1
GO:0048523	negative regulation of cellular process	1
GO:0048545	response to steroid hormone	1
GO:0048584	positive regulation of response to stimu...	1
GO:0048585	negative regulation of response to stimu...	1
GO:0048598	embryonic morphogenesis	1
GO:0048609	multicellular organismal reproductive pr...	1
GO:0048646	anatomical structure formation involved ...	1
GO:0048699	generation of neurons	1
GO:0048729	tissue morphogenesis	1
GO:0048731	system development	1
GO:0048856	anatomical structure development	1
GO:0048869	cellular developmental process	1
GO:0048870	cell motility	1
GO:0048878	chemical homeostasis	1
GO:0050657	nucleic acid transport	1
GO:0050658	RNA transport	1
GO:0050684	regulation of mRNA processing	1
GO:0050708	regulation of protein secretion	1
GO:0050778	positive regulation of immune response	1
GO:0050779	RNA destabilization	1
GO:0050790	regulation of catalytic activity	1
GO:0050796	regulation of insulin secretion	1
GO:0050801	ion homeostasis	1
GO:0050804	modulation of chemical synaptic transmis...	1
GO:0050817	coagulation	1
GO:0050818	regulation of coagulation	1
GO:0050820	positive regulation of coagulation	1
GO:0050829	defense response to Gram-negative bacter...	1
GO:0050877	nervous system process	1
GO:0050878	regulation of body fluid levels	1
GO:0050953	sensory perception of light stimulus	1
GO:0050954	sensory perception of mechanical stimulu...	1
GO:0051028	mRNA transport	1
GO:0051030	snRNA transport	1
GO:0051046	regulation of secretion	1
GO:0051049	regulation of transport	1
GO:0051052	regulation of DNA metabolic process	1
GO:0051054	positive regulation of DNA metabolic pro...	1
GO:0051056	regulation of small GTPase mediated sign...	1
GO:0051125	regulation of actin nucleation	1
GO:0051126	negative regulation of actin nucleation	1
GO:0051128	regulation of cellular component organiz...	1
GO:0051129	negative regulation of cellular componen...	1
GO:0051130	positive regulation of cellular componen...	1
GO:0051146	striated muscle cell differentiation	1
GO:0051168	nuclear export	1
GO:0051169	nuclear transport	1
GO:0051170	import into nucleus	1
GO:0051171	regulation of nitrogen compound metaboli...	1
GO:0051172	negative regulation of nitrogen compound...	1
GO:0051173	positive regulation of nitrogen compound...	1
GO:0051174	regulation of phosphorus metabolic proce...	1
GO:0051180	vitamin transport	1
GO:0051205	protein insertion into membrane	1
GO:0051223	regulation of protein transport	1
GO:0051225	spindle assembly	1
GO:0051235	maintenance of location	1
GO:0051236	establishment of RNA localization	1
GO:0051239	regulation of multicellular organismal p...	1
GO:0051240	positive regulation of multicellular org...	1
GO:0051246	regulation of protein metabolic process	1
GO:0051247	positive regulation of protein metabolic...	1
GO:0051248	negative regulation of protein metabolic...	1
GO:0051252	regulation of RNA metabolic process	1
GO:0051253	negative regulation of RNA metabolic pro...	1
GO:0051254	positive regulation of RNA metabolic pro...	1
GO:0051258	protein polymerization	1
GO:0051259	protein complex oligomerization	1
GO:0051260	protein homooligomerization	1
GO:0051261	protein depolymerization	1
GO:0051262	protein tetramerization	1
GO:0051270	regulation of cellular component movemen...	1
GO:0051276	chromosome organization	1
GO:0051298	centrosome duplication	1
GO:0051301	cell division	1
GO:0051304	chromosome separation	1
GO:0051307	meiotic chromosome separation	1
GO:0051321	meiotic cell cycle	1
GO:0051336	regulation of hydrolase activity	1
GO:0051338	regulation of transferase activity	1
GO:0051346	negative regulation of hydrolase activit...	1
GO:0051493	regulation of cytoskeleton organization	1
GO:0051494	negative regulation of cytoskeleton orga...	1
GO:0051495	positive regulation of cytoskeleton orga...	1
GO:0051560	mitochondrial calcium ion homeostasis	1
GO:0051603	proteolysis involved in cellular protein...	1
GO:0051640	organelle localization	1
GO:0051651	maintenance of location in cell	1
GO:0051656	establishment of organelle localization	1
GO:0051674	localization of cell	1
GO:0051693	actin filament capping	1
GO:0051704	multi-organism process	1
GO:0051707	response to other organism	1
GO:0051726	regulation of cell cycle	1
GO:0051923	sulfation	1
GO:0051932	synaptic transmission, GABAergic	1
GO:0055065	metal ion homeostasis	1
GO:0055070	copper ion homeostasis	1
GO:0055072	iron ion homeostasis	1
GO:0055074	calcium ion homeostasis	1
GO:0055076	transition metal ion homeostasis	1
GO:0055080	cation homeostasis	1
GO:0055082	cellular chemical homeostasis	1
GO:0055085	transmembrane transport	1
GO:0055086	nucleobase-containing small molecule met...	1
GO:0060070	canonical Wnt signaling pathway	1
GO:0060147	regulation of posttranscriptional gene s...	1
GO:0060255	regulation of macromolecule metabolic pr...	1
GO:0060271	cilium assembly	1
GO:0060401	cytosolic calcium ion transport	1
GO:0060429	epithelium development	1
GO:0060548	negative regulation of cell death	1
GO:0060632	regulation of microtubule-based movement	1
GO:0060828	regulation of canonical Wnt signaling pa...	1
GO:0060964	regulation of gene silencing by miRNA	1
GO:0060966	regulation of gene silencing by RNA	1
GO:0060968	regulation of gene silencing	1
GO:0061013	regulation of mRNA catabolic process	1
GO:0061014	positive regulation of mRNA catabolic pr...	1
GO:0061024	membrane organization	1
GO:0061041	regulation of wound healing	1
GO:0061061	muscle structure development	1
GO:0061136	regulation of proteasomal protein catabo...	1
GO:0061157	mRNA destabilization	1
GO:0061640	cytoskeleton-dependent cytokinesis	1
GO:0061919	process utilizing autophagic mechanism	1
GO:0061982	meiosis I cell cycle process	1
GO:0065002	intracellular protein transmembrane tran...	1
GO:0065003	protein-containing complex assembly	1
GO:0065009	regulation of molecular function	1
GO:0070070	proton-transporting V-type ATPase comple...	1
GO:0070071	proton-transporting two-sector ATPase co...	1
GO:0070072	vacuolar proton-transporting V-type ATPa...	1
GO:0070085	glycosylation	1
GO:0070192	chromosome organization involved in meio...	1
GO:0070201	regulation of establishment of protein l...	1
GO:0070286	axonemal dynein complex assembly	1
GO:0070481	nuclear-transcribed mRNA catabolic proce...	1
GO:0070507	regulation of microtubule cytoskeleton o...	1
GO:0070509	calcium ion import	1
GO:0070525	tRNA threonylcarbamoyladenosine metaboli...	1
GO:0070588	calcium ion transmembrane transport	1
GO:0070836	caveola assembly	1
GO:0070848	response to growth factor	1
GO:0070887	cellular response to chemical stimulus	1
GO:0070925	organelle assembly	1
GO:0070972	protein localization to endoplasmic reti...	1
GO:0070988	demethylation	1
GO:0071103	DNA conformation change	1
GO:0071166	ribonucleoprotein complex localization	1
GO:0071205	protein localization to juxtaparanode re...	1
GO:0071310	cellular response to organic substance	1
GO:0071322	cellular response to carbohydrate stimul...	1
GO:0071326	cellular response to monosaccharide stim...	1
GO:0071331	cellular response to hexose stimulus	1
GO:0071333	cellular response to glucose stimulus	1
GO:0071363	cellular response to growth factor stimu...	1
GO:0071375	cellular response to peptide hormone sti...	1
GO:0071383	cellular response to steroid hormone sti...	1
GO:0071390	cellular response to ecdysone	1
GO:0071396	cellular response to lipid	1
GO:0071407	cellular response to organic cyclic comp...	1
GO:0071417	cellular response to organonitrogen comp...	1
GO:0071426	ribonucleoprotein complex export from nu...	1
GO:0071427	mRNA-containing ribonucleoprotein comple...	1
GO:0071428	rRNA-containing ribonucleoprotein comple...	1
GO:0071495	cellular response to endogenous stimulus	1
GO:0071559	response to transforming growth factor b...	1
GO:0071560	cellular response to transforming growth...	1
GO:0071692	protein localization to extracellular re...	1
GO:0071709	membrane assembly	1
GO:0071772	response to BMP	1
GO:0071773	cellular response to BMP stimulus	1
GO:0071786	endoplasmic reticulum tubular network or...	1
GO:0071806	protein transmembrane transport	1
GO:0071816	tail-anchored membrane protein insertion...	1
GO:0071826	ribonucleoprotein complex subunit organi...	1
GO:0071897	DNA biosynthetic process	1
GO:0071900	regulation of protein serine/threonine k...	1
GO:0072001	renal system development	1
GO:0072330	monocarboxylic acid biosynthetic process	1
GO:0072359	circulatory system development	1
GO:0072503	cellular divalent inorganic cation homeo...	1
GO:0072507	divalent inorganic cation homeostasis	1
GO:0072521	purine-containing compound metabolic pro...	1
GO:0072522	purine-containing compound biosynthetic ...	1
GO:0072523	purine-containing compound catabolic pro...	1
GO:0072524	pyridine-containing compound metabolic p...	1
GO:0072525	pyridine-containing compound biosyntheti...	1
GO:0072526	pyridine-containing compound catabolic p...	1
GO:0072527	pyrimidine-containing compound metabolic...	1
GO:0072528	pyrimidine-containing compound biosynthe...	1
GO:0072529	pyrimidine-containing compound catabolic...	1
GO:0072593	reactive oxygen species metabolic proces...	1
GO:0072594	establishment of protein localization to...	1
GO:0072595	maintenance of protein localization in o...	1
GO:0072599	establishment of protein localization to...	1
GO:0072657	protein localization to membrane	1
GO:0072665	protein localization to vacuole	1
GO:0072666	establishment of protein localization to...	1
GO:0080090	regulation of primary metabolic process	1
GO:0080134	regulation of response to stress	1
GO:0080135	regulation of cellular response to stres...	1
GO:0090066	regulation of anatomical structure size	1
GO:0090087	regulation of peptide transport	1
GO:0090092	regulation of transmembrane receptor pro...	1
GO:0090101	negative regulation of transmembrane rec...	1
GO:0090150	establishment of protein localization to...	1
GO:0090263	positive regulation of canonical Wnt sig...	1
GO:0090276	regulation of peptide hormone secretion	1
GO:0090287	regulation of cellular response to growt...	1
GO:0090288	negative regulation of cellular response...	1
GO:0090303	positive regulation of wound healing	1
GO:0090305	nucleic acid phosphodiester bond hydroly...	1
GO:0090307	mitotic spindle assembly	1
GO:0090501	RNA phosphodiester bond hydrolysis	1
GO:0095500	acetylcholine receptor signaling pathway	1
GO:0097035	regulation of membrane lipid distributio...	1
GO:0097064	ncRNA export from nucleus	1
GO:0097190	apoptotic signaling pathway	1
GO:0097193	intrinsic apoptotic signaling pathway	1
GO:0097198	histone H3-K36 trimethylation	1
GO:0097305	response to alcohol	1
GO:0097306	cellular response to alcohol	1
GO:0097428	protein maturation by iron-sulfur cluste...	1
GO:0097435	supramolecular fiber organization	1
GO:0098534	centriole assembly	1
GO:0098542	defense response to other organism	1
GO:0098609	cell-cell adhesion	1
GO:0098655	cation transmembrane transport	1
GO:0098660	inorganic ion transmembrane transport	1
GO:0098662	inorganic cation transmembrane transport	1
GO:0098732	macromolecule deacylation	1
GO:0098734	macromolecule depalmitoylation	1
GO:0098742	cell-cell adhesion via plasma-membrane a...	1
GO:0098771	inorganic ion homeostasis	1
GO:0098813	nuclear chromosome segregation	1
GO:0098916	anterograde trans-synaptic signaling	1
GO:0098926	postsynaptic signal transduction	1
GO:0099003	vesicle-mediated transport in synapse	1
GO:0099111	microtubule-based transport	1
GO:0099177	regulation of trans-synaptic signaling	1
GO:0099504	synaptic vesicle cycle	1
GO:0099536	synaptic signaling	1
GO:0099537	trans-synaptic signaling	1
GO:0099612	protein localization to axon	1
GO:0099643	signal release from synapse	1
GO:0106035	protein maturation by [4Fe-4S] cluster t...	1
GO:0110020	regulation of actomyosin structure organ...	1
GO:0110053	regulation of actin filament organizatio...	1
GO:0110154	RNA decapping	1
GO:0110156	methylguanosine-cap decapping	1
GO:0120031	plasma membrane bounded cell projection ...	1
GO:0120036	plasma membrane bounded cell projection ...	1
GO:0140013	meiotic nuclear division	1
GO:0140014	mitotic nuclear division	1
GO:0140029	exocytic process	1
GO:0140053	mitochondrial gene expression	1
GO:0140056	organelle localization by membrane tethe...	1
GO:0140253	cell-cell fusion	1
GO:0140352	export from cell	1
GO:0140527	reciprocal homologous recombination	1
GO:0140694	non-membrane-bounded organelle assembly	1
GO:0198738	cell-cell signaling by wnt	1
GO:1900046	regulation of hemostasis	1
GO:1900048	positive regulation of hemostasis	1
GO:1900247	regulation of cytoplasmic translational ...	1
GO:1901135	carbohydrate derivative metabolic proces...	1
GO:1901136	carbohydrate derivative catabolic proces...	1
GO:1901137	carbohydrate derivative biosynthetic pro...	1
GO:1901222	regulation of NIK/NF-kappaB signaling	1
GO:1901292	nucleoside phosphate catabolic process	1
GO:1901293	nucleoside phosphate biosynthetic proces...	1
GO:1901361	organic cyclic compound catabolic proces...	1
GO:1901565	organonitrogen compound catabolic proces...	1
GO:1901575	organic substance catabolic process	1
GO:1901605	alpha-amino acid metabolic process	1
GO:1901607	alpha-amino acid biosynthetic process	1
GO:1901615	organic hydroxy compound metabolic proce...	1
GO:1901617	organic hydroxy compound biosynthetic pr...	1
GO:1901652	response to peptide	1
GO:1901653	cellular response to peptide	1
GO:1901654	response to ketone	1
GO:1901655	cellular response to ketone	1
GO:1901657	glycosyl compound metabolic process	1
GO:1901661	quinone metabolic process	1
GO:1901663	quinone biosynthetic process	1
GO:1901698	response to nitrogen compound	1
GO:1901699	cellular response to nitrogen compound	1
GO:1901700	response to oxygen-containing compound	1
GO:1901701	cellular response to oxygen-containing c...	1
GO:1901879	regulation of protein depolymerization	1
GO:1901880	negative regulation of protein depolymer...	1
GO:1901987	regulation of cell cycle phase transitio...	1
GO:1901988	negative regulation of cell cycle phase ...	1
GO:1901990	regulation of mitotic cell cycle phase t...	1
GO:1901991	negative regulation of mitotic cell cycl...	1
GO:1902294	cell cycle DNA replication termination	1
GO:1902317	nuclear DNA replication termination	1
GO:1902531	regulation of intracellular signal trans...	1
GO:1902532	negative regulation of intracellular sig...	1
GO:1902533	positive regulation of intracellular sig...	1
GO:1902600	proton transmembrane transport	1
GO:1902652	secondary alcohol metabolic process	1
GO:1902679	negative regulation of RNA biosynthetic ...	1
GO:1902680	positive regulation of RNA biosynthetic ...	1
GO:1902749	regulation of cell cycle G2/M phase tran...	1
GO:1902750	negative regulation of cell cycle G2/M p...	1
GO:1902850	microtubule cytoskeleton organization in...	1
GO:1902903	regulation of supramolecular fiber organ...	1
GO:1902904	negative regulation of supramolecular fi...	1
GO:1902905	positive regulation of supramolecular fi...	1
GO:1902969	mitotic DNA replication	1
GO:1902979	mitotic DNA replication termination	1
GO:1903034	regulation of response to wounding	1
GO:1903036	positive regulation of response to wound...	1
GO:1903046	meiotic cell cycle process	1
GO:1903047	mitotic cell cycle process	1
GO:1903050	regulation of proteolysis involved in ce...	1
GO:1903259	exon-exon junction complex disassembly	1
GO:1903311	regulation of mRNA metabolic process	1
GO:1903313	positive regulation of mRNA metabolic pr...	1
GO:1903320	regulation of protein modification by sm...	1
GO:1903362	regulation of cellular protein catabolic...	1
GO:1903506	regulation of nucleic acid-templated tra...	1
GO:1903507	negative regulation of nucleic acid-temp...	1
GO:1903508	positive regulation of nucleic acid-temp...	1
GO:1903509	liposaccharide metabolic process	1
GO:1903530	regulation of secretion by cell	1
GO:1903844	regulation of cellular response to trans...	1
GO:1904029	regulation of cyclin-dependent protein k...	1
GO:1904385	cellular response to angiotensin	1
GO:1905037	autophagosome organization	1
GO:1905114	cell surface receptor signaling pathway ...	1
GO:1905144	response to acetylcholine	1
GO:1905145	cellular response to acetylcholine	1
GO:1990542	mitochondrial transmembrane transport	1
GO:1990776	response to angiotensin	1
GO:2000058	regulation of ubiquitin-dependent protei...	1
GO:2000112	regulation of cellular macromolecule bio...	1
GO:2000113	negative regulation of cellular macromol...	1
GO:2000145	regulation of cell motility	1
GO:2000431	regulation of cytokinesis, actomyosin co...	1
GO:2001020	regulation of response to DNA damage sti...	1
GO:2001022	positive regulation of response to DNA d...	1
GO:2001141	regulation of RNA biosynthetic process	1
