# Supplementary material for: Heterogeneous Genomic Divergence Landscape in Two Commercially Important European Scallop Species
Source: Genes (Basel). 2022 Dec 21;14(1):14. doi: 10.3390/genes14010014 (PMC9858869; doi:10.3390/genes14010014)
Supplement: Supplementary file 1 [file genes-14-00014-s001.zip › Table_S9.txt]

CHR	SNP_position	Type	Effect	Start	Stop	Annotation	NR_ID	NR_Description	SwissP_ID	SwissP_Description	KEGG_ID	KEGG_Description	Within_gene
HiC_scaffold_1	16607914	downstream_gene_variant	NA	16605150	16605761	evm.model.000985F_PILON.17	XP_021346849.1	neurogenic_differentiation_factor_6-like__[Mizuhopecten_yessoensis]	sp|B6VQA1|DIMM_DROME	Protein_dimmed_OS=Drosophila_melanogaster_OX=7227_GN=dimm_PE=1_SV=1	crg:105329470	K08040_class_B_basic_helix-loop-helix_protein_8_|_(RefSeq)_neurogenic_differentiation_factor_4_(A)	NO
HiC_scaffold_1	16607915	downstream_gene_variant	NA	16605150	16605761	evm.model.000985F_PILON.17	XP_021346849.1	neurogenic_differentiation_factor_6-like__[Mizuhopecten_yessoensis]	sp|B6VQA1|DIMM_DROME	Protein_dimmed_OS=Drosophila_melanogaster_OX=7227_GN=dimm_PE=1_SV=1	crg:105329470	K08040_class_B_basic_helix-loop-helix_protein_8_|_(RefSeq)_neurogenic_differentiation_factor_4_(A)	NO
HiC_scaffold_1	16644539	intergenic_region	NA	16605150	16605761	evm.model.000985F_PILON.17	XP_021346849.1	neurogenic_differentiation_factor_6-like__[Mizuhopecten_yessoensis]	sp|B6VQA1|DIMM_DROME	Protein_dimmed_OS=Drosophila_melanogaster_OX=7227_GN=dimm_PE=1_SV=1	crg:105329470	K08040_class_B_basic_helix-loop-helix_protein_8_|_(RefSeq)_neurogenic_differentiation_factor_4_(A)	NO
HiC_scaffold_1	16695229	intergenic_region	NA	16605150	16605761	evm.model.000985F_PILON.17	XP_021346849.1	neurogenic_differentiation_factor_6-like__[Mizuhopecten_yessoensis]	sp|B6VQA1|DIMM_DROME	Protein_dimmed_OS=Drosophila_melanogaster_OX=7227_GN=dimm_PE=1_SV=1	crg:105329470	K08040_class_B_basic_helix-loop-helix_protein_8_|_(RefSeq)_neurogenic_differentiation_factor_4_(A)	NO
HiC_scaffold_1	16699372	intergenic_region	NA	16605150	16605761	evm.model.000985F_PILON.17	XP_021346849.1	neurogenic_differentiation_factor_6-like__[Mizuhopecten_yessoensis]	sp|B6VQA1|DIMM_DROME	Protein_dimmed_OS=Drosophila_melanogaster_OX=7227_GN=dimm_PE=1_SV=1	crg:105329470	K08040_class_B_basic_helix-loop-helix_protein_8_|_(RefSeq)_neurogenic_differentiation_factor_4_(A)	NO
HiC_scaffold_1	17115601	intergenic_region	NA	16997950	17065543	evm.model.000985F_PILON.3	XP_021370544.1	small_G_protein_signaling_modulator_3_homolog_isoform_X2__[Mizuhopecten_yessoensis]	sp|A6H8I2|SGSM3_XENLA	Small_G_protein_signaling_modulator_3_homolog_OS=Xenopus_laevis_OX=8355_GN=sgsm3_PE=2_SV=1	myi:110461425	K20176_small_G_protein_signaling_modulator_3_|_(RefSeq)_small_G_protein_signaling_modulator_3_homolog_isoform_X1_(A)	NO
HiC_scaffold_1	17115560	intergenic_region	NA	16997950	17065543	evm.model.000985F_PILON.3	XP_021370544.1	small_G_protein_signaling_modulator_3_homolog_isoform_X2__[Mizuhopecten_yessoensis]	sp|A6H8I2|SGSM3_XENLA	Small_G_protein_signaling_modulator_3_homolog_OS=Xenopus_laevis_OX=8355_GN=sgsm3_PE=2_SV=1	myi:110461425	K20176_small_G_protein_signaling_modulator_3_|_(RefSeq)_small_G_protein_signaling_modulator_3_homolog_isoform_X1_(A)	NO
HiC_scaffold_1	17115559	intergenic_region	NA	16997950	17065543	evm.model.000985F_PILON.3	XP_021370544.1	small_G_protein_signaling_modulator_3_homolog_isoform_X2__[Mizuhopecten_yessoensis]	sp|A6H8I2|SGSM3_XENLA	Small_G_protein_signaling_modulator_3_homolog_OS=Xenopus_laevis_OX=8355_GN=sgsm3_PE=2_SV=1	myi:110461425	K20176_small_G_protein_signaling_modulator_3_|_(RefSeq)_small_G_protein_signaling_modulator_3_homolog_isoform_X1_(A)	NO
HiC_scaffold_1	17138692	intergenic_region	NA	16997950	17065543	evm.model.000985F_PILON.3	XP_021370544.1	small_G_protein_signaling_modulator_3_homolog_isoform_X2__[Mizuhopecten_yessoensis]	sp|A6H8I2|SGSM3_XENLA	Small_G_protein_signaling_modulator_3_homolog_OS=Xenopus_laevis_OX=8355_GN=sgsm3_PE=2_SV=1	myi:110461425	K20176_small_G_protein_signaling_modulator_3_|_(RefSeq)_small_G_protein_signaling_modulator_3_homolog_isoform_X1_(A)	NO
HiC_scaffold_1	17138697	intergenic_region	NA	16997950	17065543	evm.model.000985F_PILON.3	XP_021370544.1	small_G_protein_signaling_modulator_3_homolog_isoform_X2__[Mizuhopecten_yessoensis]	sp|A6H8I2|SGSM3_XENLA	Small_G_protein_signaling_modulator_3_homolog_OS=Xenopus_laevis_OX=8355_GN=sgsm3_PE=2_SV=1	myi:110461425	K20176_small_G_protein_signaling_modulator_3_|_(RefSeq)_small_G_protein_signaling_modulator_3_homolog_isoform_X1_(A)	NO
HiC_scaffold_1	17161024	upstream_gene_variant	NA	17159318	17159653	evm.model.001270F_PILON.11	XP_014287368.1	uncharacterized_protein_LOC106687790__[Halyomorpha_halys]	NA	NA	NA	NA	NO
HiC_scaffold_1	17201048	intergenic_region	NA	17172049	17174007	evm.model.001270F_PILON.14	PVD18325.1	hypothetical_protein_C0Q70_20874__[Pomacea_canaliculata]	sp|Q9H2D6|TARA_HUMAN	TRIO_and_F-actin-binding_protein_OS=Homo_sapiens_OX=9606_GN=TRIOBP_PE=1_SV=3	sasa:106592811	K03344_Dvl-binding_protein_IDAX_|_(RefSeq)_mucin-19-like_(A)	NO
HiC_scaffold_1	17201047	intergenic_region	NA	17172049	17174007	evm.model.001270F_PILON.14	PVD18325.1	hypothetical_protein_C0Q70_20874__[Pomacea_canaliculata]	sp|Q9H2D6|TARA_HUMAN	TRIO_and_F-actin-binding_protein_OS=Homo_sapiens_OX=9606_GN=TRIOBP_PE=1_SV=3	sasa:106592811	K03344_Dvl-binding_protein_IDAX_|_(RefSeq)_mucin-19-like_(A)	NO
HiC_scaffold_1	17260618	intergenic_region	NA	17216970	17246032	evm.model.001270F_PILON.18	XP_021368449.1	uncharacterized_protein_LOC110460066__[Mizuhopecten_yessoensis]	NA	NA	NA	NA	NO
HiC_scaffold_1	17260609	intergenic_region	NA	17216970	17246032	evm.model.001270F_PILON.18	XP_021368449.1	uncharacterized_protein_LOC110460066__[Mizuhopecten_yessoensis]	NA	NA	NA	NA	NO
HiC_scaffold_1	17269170	upstream_gene_variant	NA	17216970	17246032	evm.model.001270F_PILON.18	XP_021368449.1	uncharacterized_protein_LOC110460066__[Mizuhopecten_yessoensis]	NA	NA	NA	NA	NO
HiC_scaffold_1	19036988	intron_variant	NA	19034619	19040182	evm.model.000681F_PILON.2	XP_021355755.1	E3_ubiquitin-protein_ligase_RNF181-like__[Mizuhopecten_yessoensis]	sp|Q6GPV5|RN181_XENLA	E3_ubiquitin-protein_ligase_RNF181_OS=Xenopus_laevis_OX=8355_GN=rnf181_PE=2_SV=1	myi:110451860	K22378_E3_ubiquitin-protein_ligase_RNF181_[EC:2.3.2.27]_|_(RefSeq)_E3_ubiquitin-protein_ligase_RNF181-like_(A)	YES
HiC_scaffold_1	19036987	intron_variant	NA	19034619	19040182	evm.model.000681F_PILON.2	XP_021355755.1	E3_ubiquitin-protein_ligase_RNF181-like__[Mizuhopecten_yessoensis]	sp|Q6GPV5|RN181_XENLA	E3_ubiquitin-protein_ligase_RNF181_OS=Xenopus_laevis_OX=8355_GN=rnf181_PE=2_SV=1	myi:110451860	K22378_E3_ubiquitin-protein_ligase_RNF181_[EC:2.3.2.27]_|_(RefSeq)_E3_ubiquitin-protein_ligase_RNF181-like_(A)	YES
HiC_scaffold_1	19038734	intron_variant	NA	19034619	19040182	evm.model.000681F_PILON.2	XP_021355755.1	E3_ubiquitin-protein_ligase_RNF181-like__[Mizuhopecten_yessoensis]	sp|Q6GPV5|RN181_XENLA	E3_ubiquitin-protein_ligase_RNF181_OS=Xenopus_laevis_OX=8355_GN=rnf181_PE=2_SV=1	myi:110451860	K22378_E3_ubiquitin-protein_ligase_RNF181_[EC:2.3.2.27]_|_(RefSeq)_E3_ubiquitin-protein_ligase_RNF181-like_(A)	YES
HiC_scaffold_1	19038749	intron_variant	NA	19034619	19040182	evm.model.000681F_PILON.2	XP_021355755.1	E3_ubiquitin-protein_ligase_RNF181-like__[Mizuhopecten_yessoensis]	sp|Q6GPV5|RN181_XENLA	E3_ubiquitin-protein_ligase_RNF181_OS=Xenopus_laevis_OX=8355_GN=rnf181_PE=2_SV=1	myi:110451860	K22378_E3_ubiquitin-protein_ligase_RNF181_[EC:2.3.2.27]_|_(RefSeq)_E3_ubiquitin-protein_ligase_RNF181-like_(A)	YES
HiC_scaffold_1	19038751	intron_variant	NA	19034619	19040182	evm.model.000681F_PILON.2	XP_021355755.1	E3_ubiquitin-protein_ligase_RNF181-like__[Mizuhopecten_yessoensis]	sp|Q6GPV5|RN181_XENLA	E3_ubiquitin-protein_ligase_RNF181_OS=Xenopus_laevis_OX=8355_GN=rnf181_PE=2_SV=1	myi:110451860	K22378_E3_ubiquitin-protein_ligase_RNF181_[EC:2.3.2.27]_|_(RefSeq)_E3_ubiquitin-protein_ligase_RNF181-like_(A)	YES
HiC_scaffold_1	19069932	intron_variant	NA	19047498	19092179	evm.model.000681F_PILON.4	XP_021355757.1	zinc_transporter_ZIP11-like__[Mizuhopecten_yessoensis]	sp|Q8BWY7|S39AB_MOUSE	Zinc_transporter_ZIP11_OS=Mus_musculus_OX=10090_GN=Slc39a11_PE=1_SV=1	myi:110451861	K14717_solute_carrier_family_39_(zinc_transporter),_member_11_|_(RefSeq)_zinc_transporter_ZIP11-like_(A)	YES
HiC_scaffold_1	19069898	intron_variant	NA	19047498	19092179	evm.model.000681F_PILON.4	XP_021355757.1	zinc_transporter_ZIP11-like__[Mizuhopecten_yessoensis]	sp|Q8BWY7|S39AB_MOUSE	Zinc_transporter_ZIP11_OS=Mus_musculus_OX=10090_GN=Slc39a11_PE=1_SV=1	myi:110451861	K14717_solute_carrier_family_39_(zinc_transporter),_member_11_|_(RefSeq)_zinc_transporter_ZIP11-like_(A)	YES
HiC_scaffold_1	20349849	intron_variant	NA	20306669	20355753	evm.model.000246F_PILON.2	XP_021360081.1	neuropeptide_SIFamide_receptor-like__[Mizuhopecten_yessoensis]	sp|Q8IN35|SIFAR_DROME	Neuropeptide_SIFamide_receptor_OS=Drosophila_melanogaster_OX=7227_GN=SIFaR_PE=2_SV=2	myi:110454731	K08375_neuropeptide_FF_receptor_2_|_(RefSeq)_neuropeptide_SIFamide_receptor-like_(A)	YES
HiC_scaffold_1	20349787	intron_variant	NA	20306669	20355753	evm.model.000246F_PILON.2	XP_021360081.1	neuropeptide_SIFamide_receptor-like__[Mizuhopecten_yessoensis]	sp|Q8IN35|SIFAR_DROME	Neuropeptide_SIFamide_receptor_OS=Drosophila_melanogaster_OX=7227_GN=SIFaR_PE=2_SV=2	myi:110454731	K08375_neuropeptide_FF_receptor_2_|_(RefSeq)_neuropeptide_SIFamide_receptor-like_(A)	YES
HiC_scaffold_1	20355168	missense_variant	MODERATE	20306669	20355753	evm.model.000246F_PILON.2	XP_021360081.1	neuropeptide_SIFamide_receptor-like__[Mizuhopecten_yessoensis]	sp|Q8IN35|SIFAR_DROME	Neuropeptide_SIFamide_receptor_OS=Drosophila_melanogaster_OX=7227_GN=SIFaR_PE=2_SV=2	myi:110454731	K08375_neuropeptide_FF_receptor_2_|_(RefSeq)_neuropeptide_SIFamide_receptor-like_(A)	YES
HiC_scaffold_1	20369132	intron_variant	NA	20360302	20377373	evm.model.000246F_PILON.3	XP_023675098.1	serine/threonine-protein_kinase_WNK2-like__[Paramormyrops_kingsleyae]	NA	NA	bvg:104905407	K10955_mucin-2_|_(RefSeq)_mucin-2-like_(A)	YES
HiC_scaffold_1	20369148	intron_variant	NA	20360302	20377373	evm.model.000246F_PILON.3	XP_023675098.1	serine/threonine-protein_kinase_WNK2-like__[Paramormyrops_kingsleyae]	NA	NA	bvg:104905407	K10955_mucin-2_|_(RefSeq)_mucin-2-like_(A)	YES
HiC_scaffold_1	20369159	intron_variant	NA	20360302	20377373	evm.model.000246F_PILON.3	XP_023675098.1	serine/threonine-protein_kinase_WNK2-like__[Paramormyrops_kingsleyae]	NA	NA	bvg:104905407	K10955_mucin-2_|_(RefSeq)_mucin-2-like_(A)	YES
HiC_scaffold_1	20369108	intron_variant	NA	20360302	20377373	evm.model.000246F_PILON.3	XP_023675098.1	serine/threonine-protein_kinase_WNK2-like__[Paramormyrops_kingsleyae]	NA	NA	bvg:104905407	K10955_mucin-2_|_(RefSeq)_mucin-2-like_(A)	YES
HiC_scaffold_1	20378949	upstream_gene_variant	NA	20360302	20377373	evm.model.000246F_PILON.3	XP_023675098.1	serine/threonine-protein_kinase_WNK2-like__[Paramormyrops_kingsleyae]	NA	NA	bvg:104905407	K10955_mucin-2_|_(RefSeq)_mucin-2-like_(A)	NO
HiC_scaffold_1	20378962	upstream_gene_variant	NA	20360302	20377373	evm.model.000246F_PILON.3	XP_023675098.1	serine/threonine-protein_kinase_WNK2-like__[Paramormyrops_kingsleyae]	NA	NA	bvg:104905407	K10955_mucin-2_|_(RefSeq)_mucin-2-like_(A)	NO
HiC_scaffold_1	20378979	upstream_gene_variant	NA	20360302	20377373	evm.model.000246F_PILON.3	XP_023675098.1	serine/threonine-protein_kinase_WNK2-like__[Paramormyrops_kingsleyae]	NA	NA	bvg:104905407	K10955_mucin-2_|_(RefSeq)_mucin-2-like_(A)	NO
HiC_scaffold_1	20384288	upstream_gene_variant	NA	20360302	20377373	evm.model.000246F_PILON.3	XP_023675098.1	serine/threonine-protein_kinase_WNK2-like__[Paramormyrops_kingsleyae]	NA	NA	bvg:104905407	K10955_mucin-2_|_(RefSeq)_mucin-2-like_(A)	NO
HiC_scaffold_1	20384296	upstream_gene_variant	NA	20360302	20377373	evm.model.000246F_PILON.3	XP_023675098.1	serine/threonine-protein_kinase_WNK2-like__[Paramormyrops_kingsleyae]	NA	NA	bvg:104905407	K10955_mucin-2_|_(RefSeq)_mucin-2-like_(A)	NO
HiC_scaffold_1	20384304	upstream_gene_variant	NA	20360302	20377373	evm.model.000246F_PILON.3	XP_023675098.1	serine/threonine-protein_kinase_WNK2-like__[Paramormyrops_kingsleyae]	NA	NA	bvg:104905407	K10955_mucin-2_|_(RefSeq)_mucin-2-like_(A)	NO
HiC_scaffold_1	20828033	intron_variant	NA	20815721	20863153	evm.model.000246F_PILON.27	EKC28057.1	Short_transient_receptor_potential_channel_3__[Crassostrea_gigas]	sp|Q13507|TRPC3_HUMAN	Short_transient_receptor_potential_channel_3_OS=Homo_sapiens_OX=9606_GN=TRPC3_PE=1_SV=3	myi:110441447	K04966_transient_receptor_potential_cation_channel_subfamily_C_member_3_|_(RefSeq)_short_transient_receptor_potential_channel_3-like_(A)	YES
HiC_scaffold_1	20827990	intron_variant	NA	20815721	20863153	evm.model.000246F_PILON.27	EKC28057.1	Short_transient_receptor_potential_channel_3__[Crassostrea_gigas]	sp|Q13507|TRPC3_HUMAN	Short_transient_receptor_potential_channel_3_OS=Homo_sapiens_OX=9606_GN=TRPC3_PE=1_SV=3	myi:110441447	K04966_transient_receptor_potential_cation_channel_subfamily_C_member_3_|_(RefSeq)_short_transient_receptor_potential_channel_3-like_(A)	YES
HiC_scaffold_1	20827981	intron_variant	NA	20815721	20863153	evm.model.000246F_PILON.27	EKC28057.1	Short_transient_receptor_potential_channel_3__[Crassostrea_gigas]	sp|Q13507|TRPC3_HUMAN	Short_transient_receptor_potential_channel_3_OS=Homo_sapiens_OX=9606_GN=TRPC3_PE=1_SV=3	myi:110441447	K04966_transient_receptor_potential_cation_channel_subfamily_C_member_3_|_(RefSeq)_short_transient_receptor_potential_channel_3-like_(A)	YES
HiC_scaffold_1	20831820	intron_variant	NA	20815721	20863153	evm.model.000246F_PILON.27	EKC28057.1	Short_transient_receptor_potential_channel_3__[Crassostrea_gigas]	sp|Q13507|TRPC3_HUMAN	Short_transient_receptor_potential_channel_3_OS=Homo_sapiens_OX=9606_GN=TRPC3_PE=1_SV=3	myi:110441447	K04966_transient_receptor_potential_cation_channel_subfamily_C_member_3_|_(RefSeq)_short_transient_receptor_potential_channel_3-like_(A)	YES
HiC_scaffold_1	20854349	intron_variant	NA	20815721	20863153	evm.model.000246F_PILON.27	EKC28057.1	Short_transient_receptor_potential_channel_3__[Crassostrea_gigas]	sp|Q13507|TRPC3_HUMAN	Short_transient_receptor_potential_channel_3_OS=Homo_sapiens_OX=9606_GN=TRPC3_PE=1_SV=3	myi:110441447	K04966_transient_receptor_potential_cation_channel_subfamily_C_member_3_|_(RefSeq)_short_transient_receptor_potential_channel_3-like_(A)	YES
HiC_scaffold_1	20854331	intron_variant	NA	20815721	20863153	evm.model.000246F_PILON.27	EKC28057.1	Short_transient_receptor_potential_channel_3__[Crassostrea_gigas]	sp|Q13507|TRPC3_HUMAN	Short_transient_receptor_potential_channel_3_OS=Homo_sapiens_OX=9606_GN=TRPC3_PE=1_SV=3	myi:110441447	K04966_transient_receptor_potential_cation_channel_subfamily_C_member_3_|_(RefSeq)_short_transient_receptor_potential_channel_3-like_(A)	YES
HiC_scaffold_1	21613345	intergenic_region	NA	21520958	21521176	evm.model.003401F_PILON.4	NA	NA	NA	NA	NA	NA	NO
HiC_scaffold_1	21637204	downstream_gene_variant	NA	21632534	21635160	evm.model.002447F_PILON.4	XP_023335951.1	mucin-22-like__[Eurytemora_affinis]	NA	NA	xla:108695696	K20684_Rho_guanine_nucleotide_exchange_factor_5_|_(RefSeq)_uncharacterized_LOC108695696_(A)	NO
HiC_scaffold_1	21637206	downstream_gene_variant	NA	21632534	21635160	evm.model.002447F_PILON.4	XP_023335951.1	mucin-22-like__[Eurytemora_affinis]	NA	NA	xla:108695696	K20684_Rho_guanine_nucleotide_exchange_factor_5_|_(RefSeq)_uncharacterized_LOC108695696_(A)	NO
HiC_scaffold_1	21637160	downstream_gene_variant	NA	21632534	21635160	evm.model.002447F_PILON.4	XP_023335951.1	mucin-22-like__[Eurytemora_affinis]	NA	NA	xla:108695696	K20684_Rho_guanine_nucleotide_exchange_factor_5_|_(RefSeq)_uncharacterized_LOC108695696_(A)	NO
HiC_scaffold_1	21637146	downstream_gene_variant	NA	21632534	21635160	evm.model.002447F_PILON.4	XP_023335951.1	mucin-22-like__[Eurytemora_affinis]	NA	NA	xla:108695696	K20684_Rho_guanine_nucleotide_exchange_factor_5_|_(RefSeq)_uncharacterized_LOC108695696_(A)	NO
HiC_scaffold_1	29202807	intron_variant	NA	29175592	29278989	evm.model.001183F_PILON.28.1	OWF35161.1	hypothetical_protein_KP79_PYT05405__[Mizuhopecten_yessoensis]	NA	NA	NA	NA	YES
HiC_scaffold_1	29202775	intron_variant	NA	29175592	29278989	evm.model.001183F_PILON.28.1	OWF35161.1	hypothetical_protein_KP79_PYT05405__[Mizuhopecten_yessoensis]	NA	NA	NA	NA	YES
HiC_scaffold_1	29251429	intron_variant	NA	29175592	29278989	evm.model.001183F_PILON.28.1	OWF35161.1	hypothetical_protein_KP79_PYT05405__[Mizuhopecten_yessoensis]	NA	NA	NA	NA	YES
HiC_scaffold_1	29260001	synonymous_variant	LOW	29175592	29278989	evm.model.001183F_PILON.28.1	OWF35161.1	hypothetical_protein_KP79_PYT05405__[Mizuhopecten_yessoensis]	NA	NA	NA	NA	YES
HiC_scaffold_1	29279915	upstream_gene_variant	NA	29175592	29278989	evm.model.001183F_PILON.28.1	OWF35161.1	hypothetical_protein_KP79_PYT05405__[Mizuhopecten_yessoensis]	NA	NA	NA	NA	NO
HiC_scaffold_1	29279918	upstream_gene_variant	NA	29175592	29278989	evm.model.001183F_PILON.28.1	OWF35161.1	hypothetical_protein_KP79_PYT05405__[Mizuhopecten_yessoensis]	NA	NA	NA	NA	NO
HiC_scaffold_2	9712863	upstream_gene_variant	NA	9692859	9709582	evm.model.000002F_PILON.127.1	XP_021349492.1	nuclear_hormone_receptor_E75-like_isoform_X1__[Mizuhopecten_yessoensis]	sp|O77245|E75_METEN	Nuclear_hormone_receptor_E75_OS=Metapenaeus_ensis_OX=32278_GN=E75_PE=2_SV=1	crg:105331216	K08530_peroxisome_proliferator-activated_receptor_gamma_|_(RefSeq)_retinoic_acid_receptor_gamma_isoform_X1_(A)	NO
HiC_scaffold_2	9756687	intergenic_region	NA	9739705	9748697	evm.model.000002F_PILON.135	XP_021349496.1	vitamin_D3_receptor-like_isoform_X3__[Mizuhopecten_yessoensis]	sp|F1QLY4|RORAA_DANRE	Nuclear_receptor_ROR-alpha_A_OS=Danio_rerio_OX=7955_GN=roraa_PE=2_SV=2	myi:110447864	K08532_RAR-related_orphan_receptor_alpha_|_(RefSeq)_vitamin_D3_receptor-like_isoform_X1_(A)	NO
HiC_scaffold_2	9756688	intergenic_region	NA	9739705	9748697	evm.model.000002F_PILON.135	XP_021349496.1	vitamin_D3_receptor-like_isoform_X3__[Mizuhopecten_yessoensis]	sp|F1QLY4|RORAA_DANRE	Nuclear_receptor_ROR-alpha_A_OS=Danio_rerio_OX=7955_GN=roraa_PE=2_SV=2	myi:110447864	K08532_RAR-related_orphan_receptor_alpha_|_(RefSeq)_vitamin_D3_receptor-like_isoform_X1_(A)	NO
HiC_scaffold_2	9756705	intergenic_region	NA	9739705	9748697	evm.model.000002F_PILON.135	XP_021349496.1	vitamin_D3_receptor-like_isoform_X3__[Mizuhopecten_yessoensis]	sp|F1QLY4|RORAA_DANRE	Nuclear_receptor_ROR-alpha_A_OS=Danio_rerio_OX=7955_GN=roraa_PE=2_SV=2	myi:110447864	K08532_RAR-related_orphan_receptor_alpha_|_(RefSeq)_vitamin_D3_receptor-like_isoform_X1_(A)	NO
HiC_scaffold_2	9780086	intergenic_region	NA	9739705	9748697	evm.model.000002F_PILON.135	XP_021349496.1	vitamin_D3_receptor-like_isoform_X3__[Mizuhopecten_yessoensis]	sp|F1QLY4|RORAA_DANRE	Nuclear_receptor_ROR-alpha_A_OS=Danio_rerio_OX=7955_GN=roraa_PE=2_SV=2	myi:110447864	K08532_RAR-related_orphan_receptor_alpha_|_(RefSeq)_vitamin_D3_receptor-like_isoform_X1_(A)	NO
HiC_scaffold_2	9792200	upstream_gene_variant	NA	9789715	9791528	evm.model.000002F_PILON.138	SUX22649.1	Uncharacterised_protein__[Cardiobacterium_valvarum]	NA	NA	lak:106180727	K14317_nuclear_pore_complex_protein_Nup214_|_(RefSeq)_nuclear_pore_complex_protein_Nup214_isoform_X1_(A)	NO
HiC_scaffold_2	10443475	intron_variant	NA	10439497	10453329	evm.model.000002F_PILON.169	XP_021350385.1	uncharacterized_protein_LOC110448454_isoform_X3__[Mizuhopecten_yessoensis]	NA	NA	NA	NA	YES
HiC_scaffold_2	10453486	downstream_gene_variant	NA	10439497	10453329	evm.model.000002F_PILON.169	XP_021350385.1	uncharacterized_protein_LOC110448454_isoform_X3__[Mizuhopecten_yessoensis]	NA	NA	NA	NA	NO
HiC_scaffold_2	10453503	downstream_gene_variant	NA	10439497	10453329	evm.model.000002F_PILON.169	XP_021350385.1	uncharacterized_protein_LOC110448454_isoform_X3__[Mizuhopecten_yessoensis]	NA	NA	NA	NA	NO
HiC_scaffold_2	10461073	intergenic_region	NA	10439497	10453329	evm.model.000002F_PILON.169	XP_021350385.1	uncharacterized_protein_LOC110448454_isoform_X3__[Mizuhopecten_yessoensis]	NA	NA	NA	NA	NO
HiC_scaffold_2	10461078	intergenic_region	NA	10439497	10453329	evm.model.000002F_PILON.169	XP_021350385.1	uncharacterized_protein_LOC110448454_isoform_X3__[Mizuhopecten_yessoensis]	NA	NA	NA	NA	NO
HiC_scaffold_2	10461046	intergenic_region	NA	10439497	10453329	evm.model.000002F_PILON.169	XP_021350385.1	uncharacterized_protein_LOC110448454_isoform_X3__[Mizuhopecten_yessoensis]	NA	NA	NA	NA	NO
HiC_scaffold_2	10461034	intergenic_region	NA	10439497	10453329	evm.model.000002F_PILON.169	XP_021350385.1	uncharacterized_protein_LOC110448454_isoform_X3__[Mizuhopecten_yessoensis]	NA	NA	NA	NA	NO
HiC_scaffold_2	10461017	intergenic_region	NA	10439497	10453329	evm.model.000002F_PILON.169	XP_021350385.1	uncharacterized_protein_LOC110448454_isoform_X3__[Mizuhopecten_yessoensis]	NA	NA	NA	NA	NO
HiC_scaffold_2	10494611	downstream_gene_variant	NA	10483264	10493686	evm.model.000002F_PILON.170	XP_021350380.1	major_egg_antigen-like__[Mizuhopecten_yessoensis]	sp|P12812|P40_SCHMA	Major_egg_antigen_OS=Schistosoma_mansoni_OX=6183_PE=2_SV=1	smm:Smp_048050	K09541_crystallin,_alpha_A_|_(RefSeq)_putative_alpha_crystallin_A_chain_[Contains:_Alpha_crystallin_A_chain,_short_form]_(A)	NO
HiC_scaffold_2	10494582	downstream_gene_variant	NA	10483264	10493686	evm.model.000002F_PILON.170	XP_021350380.1	major_egg_antigen-like__[Mizuhopecten_yessoensis]	sp|P12812|P40_SCHMA	Major_egg_antigen_OS=Schistosoma_mansoni_OX=6183_PE=2_SV=1	smm:Smp_048050	K09541_crystallin,_alpha_A_|_(RefSeq)_putative_alpha_crystallin_A_chain_[Contains:_Alpha_crystallin_A_chain,_short_form]_(A)	NO
HiC_scaffold_2	10744428	3_prime_UTR_variant	NA	10744209	10770654	evm.model.000002F_PILON.188_evm.model.000002F_PILON.189	XP_021346326.1	tyrosine-protein_kinase_BAZ1B-like_isoform_X1__[Mizuhopecten_yessoensis]	sp|Q9UIG0|BAZ1B_HUMAN	Tyrosine-protein_kinase_BAZ1B_OS=Homo_sapiens_OX=9606_GN=BAZ1B_PE=1_SV=2	crg:105331842	K11658_bromodomain_adjacent_to_zinc_finger_domain_protein_1B_|_(RefSeq)_tyrosine-protein_kinase_BAZ1B_isoform_X1_(A)	YES
HiC_scaffold_2	10744416	3_prime_UTR_variant	NA	10744209	10770654	evm.model.000002F_PILON.188_evm.model.000002F_PILON.189	XP_021346326.1	tyrosine-protein_kinase_BAZ1B-like_isoform_X1__[Mizuhopecten_yessoensis]	sp|Q9UIG0|BAZ1B_HUMAN	Tyrosine-protein_kinase_BAZ1B_OS=Homo_sapiens_OX=9606_GN=BAZ1B_PE=1_SV=2	crg:105331842	K11658_bromodomain_adjacent_to_zinc_finger_domain_protein_1B_|_(RefSeq)_tyrosine-protein_kinase_BAZ1B_isoform_X1_(A)	YES
HiC_scaffold_2	10747782	synonymous_variant	LOW	10744209	10770654	evm.model.000002F_PILON.188_evm.model.000002F_PILON.189	XP_021346326.1	tyrosine-protein_kinase_BAZ1B-like_isoform_X1__[Mizuhopecten_yessoensis]	sp|Q9UIG0|BAZ1B_HUMAN	Tyrosine-protein_kinase_BAZ1B_OS=Homo_sapiens_OX=9606_GN=BAZ1B_PE=1_SV=2	crg:105331842	K11658_bromodomain_adjacent_to_zinc_finger_domain_protein_1B_|_(RefSeq)_tyrosine-protein_kinase_BAZ1B_isoform_X1_(A)	YES
HiC_scaffold_2	10747788	synonymous_variant	LOW	10744209	10770654	evm.model.000002F_PILON.188_evm.model.000002F_PILON.189	XP_021346326.1	tyrosine-protein_kinase_BAZ1B-like_isoform_X1__[Mizuhopecten_yessoensis]	sp|Q9UIG0|BAZ1B_HUMAN	Tyrosine-protein_kinase_BAZ1B_OS=Homo_sapiens_OX=9606_GN=BAZ1B_PE=1_SV=2	crg:105331842	K11658_bromodomain_adjacent_to_zinc_finger_domain_protein_1B_|_(RefSeq)_tyrosine-protein_kinase_BAZ1B_isoform_X1_(A)	YES
HiC_scaffold_2	10767499	intron_variant	NA	10744209	10770654	evm.model.000002F_PILON.188_evm.model.000002F_PILON.189	XP_021346326.1	tyrosine-protein_kinase_BAZ1B-like_isoform_X1__[Mizuhopecten_yessoensis]	sp|Q9UIG0|BAZ1B_HUMAN	Tyrosine-protein_kinase_BAZ1B_OS=Homo_sapiens_OX=9606_GN=BAZ1B_PE=1_SV=2	crg:105331842	K11658_bromodomain_adjacent_to_zinc_finger_domain_protein_1B_|_(RefSeq)_tyrosine-protein_kinase_BAZ1B_isoform_X1_(A)	YES
HiC_scaffold_2	10777588	intron_variant	NA	10773265	10796802	evm.model.000002F_PILON.190	OWF56582.1	Flap_endonuclease_GEN-like_1__[Mizuhopecten_yessoensis]	sp|Q17RS7|GEN_HUMAN	Flap_endonuclease_GEN_homolog_1_OS=Homo_sapiens_OX=9606_GN=GEN1_PE=1_SV=2	myi:110445853	K15338_flap_endonuclease_GEN_[EC:3.1.-.-]_|_(RefSeq)_flap_endonuclease_GEN_homolog_1-like_(A)	YES
HiC_scaffold_2	10777603	intron_variant	NA	10773265	10796802	evm.model.000002F_PILON.190	OWF56582.1	Flap_endonuclease_GEN-like_1__[Mizuhopecten_yessoensis]	sp|Q17RS7|GEN_HUMAN	Flap_endonuclease_GEN_homolog_1_OS=Homo_sapiens_OX=9606_GN=GEN1_PE=1_SV=2	myi:110445853	K15338_flap_endonuclease_GEN_[EC:3.1.-.-]_|_(RefSeq)_flap_endonuclease_GEN_homolog_1-like_(A)	YES
HiC_scaffold_2	10777570	intron_variant	NA	10773265	10796802	evm.model.000002F_PILON.190	OWF56582.1	Flap_endonuclease_GEN-like_1__[Mizuhopecten_yessoensis]	sp|Q17RS7|GEN_HUMAN	Flap_endonuclease_GEN_homolog_1_OS=Homo_sapiens_OX=9606_GN=GEN1_PE=1_SV=2	myi:110445853	K15338_flap_endonuclease_GEN_[EC:3.1.-.-]_|_(RefSeq)_flap_endonuclease_GEN_homolog_1-like_(A)	YES
HiC_scaffold_2	10777564	intron_variant	NA	10773265	10796802	evm.model.000002F_PILON.190	OWF56582.1	Flap_endonuclease_GEN-like_1__[Mizuhopecten_yessoensis]	sp|Q17RS7|GEN_HUMAN	Flap_endonuclease_GEN_homolog_1_OS=Homo_sapiens_OX=9606_GN=GEN1_PE=1_SV=2	myi:110445853	K15338_flap_endonuclease_GEN_[EC:3.1.-.-]_|_(RefSeq)_flap_endonuclease_GEN_homolog_1-like_(A)	YES
HiC_scaffold_2	10788547	intron_variant	NA	10773265	10796802	evm.model.000002F_PILON.190	OWF56582.1	Flap_endonuclease_GEN-like_1__[Mizuhopecten_yessoensis]	sp|Q17RS7|GEN_HUMAN	Flap_endonuclease_GEN_homolog_1_OS=Homo_sapiens_OX=9606_GN=GEN1_PE=1_SV=2	myi:110445853	K15338_flap_endonuclease_GEN_[EC:3.1.-.-]_|_(RefSeq)_flap_endonuclease_GEN_homolog_1-like_(A)	YES
HiC_scaffold_2	10797384	upstream_gene_variant	NA	10773265	10796802	evm.model.000002F_PILON.190	OWF56582.1	Flap_endonuclease_GEN-like_1__[Mizuhopecten_yessoensis]	sp|Q17RS7|GEN_HUMAN	Flap_endonuclease_GEN_homolog_1_OS=Homo_sapiens_OX=9606_GN=GEN1_PE=1_SV=2	myi:110445853	K15338_flap_endonuclease_GEN_[EC:3.1.-.-]_|_(RefSeq)_flap_endonuclease_GEN_homolog_1-like_(A)	NO
HiC_scaffold_2	10797397	upstream_gene_variant	NA	10773265	10796802	evm.model.000002F_PILON.190	OWF56582.1	Flap_endonuclease_GEN-like_1__[Mizuhopecten_yessoensis]	sp|Q17RS7|GEN_HUMAN	Flap_endonuclease_GEN_homolog_1_OS=Homo_sapiens_OX=9606_GN=GEN1_PE=1_SV=2	myi:110445853	K15338_flap_endonuclease_GEN_[EC:3.1.-.-]_|_(RefSeq)_flap_endonuclease_GEN_homolog_1-like_(A)	NO
HiC_scaffold_2	10839607	intergenic_region	NA	10809028	10820915	evm.model.000002F_PILON.192	PKL90991.1	hypothetical_protein_CVV21_09300,_partial__[Candidatus_Goldbacteria_bacterium_HGW-Goldbacteria-1]	sp|Q7TQN8|GP119_RAT	Glucose-dependent_insulinotropic_receptor_OS=Rattus_norvegicus_OX=10116_GN=Gpr119_PE=1_SV=1	aje:HCAG_07263	K01183_chitinase_[EC:3.2.1.14]_|_(RefSeq)_hypothetical_protein_(A)	NO
HiC_scaffold_2	10839588	intergenic_region	NA	10809028	10820915	evm.model.000002F_PILON.192	PKL90991.1	hypothetical_protein_CVV21_09300,_partial__[Candidatus_Goldbacteria_bacterium_HGW-Goldbacteria-1]	sp|Q7TQN8|GP119_RAT	Glucose-dependent_insulinotropic_receptor_OS=Rattus_norvegicus_OX=10116_GN=Gpr119_PE=1_SV=1	aje:HCAG_07263	K01183_chitinase_[EC:3.2.1.14]_|_(RefSeq)_hypothetical_protein_(A)	NO
HiC_scaffold_2	10856333	upstream_gene_variant	NA	10809028	10820915	evm.model.000002F_PILON.192	PKL90991.1	hypothetical_protein_CVV21_09300,_partial__[Candidatus_Goldbacteria_bacterium_HGW-Goldbacteria-1]	sp|Q7TQN8|GP119_RAT	Glucose-dependent_insulinotropic_receptor_OS=Rattus_norvegicus_OX=10116_GN=Gpr119_PE=1_SV=1	aje:HCAG_07263	K01183_chitinase_[EC:3.2.1.14]_|_(RefSeq)_hypothetical_protein_(A)	NO
HiC_scaffold_2	10856345	upstream_gene_variant	NA	10809028	10820915	evm.model.000002F_PILON.192	PKL90991.1	hypothetical_protein_CVV21_09300,_partial__[Candidatus_Goldbacteria_bacterium_HGW-Goldbacteria-1]	sp|Q7TQN8|GP119_RAT	Glucose-dependent_insulinotropic_receptor_OS=Rattus_norvegicus_OX=10116_GN=Gpr119_PE=1_SV=1	aje:HCAG_07263	K01183_chitinase_[EC:3.2.1.14]_|_(RefSeq)_hypothetical_protein_(A)	NO
HiC_scaffold_2	10856298	upstream_gene_variant	NA	10809028	10820915	evm.model.000002F_PILON.192	PKL90991.1	hypothetical_protein_CVV21_09300,_partial__[Candidatus_Goldbacteria_bacterium_HGW-Goldbacteria-1]	sp|Q7TQN8|GP119_RAT	Glucose-dependent_insulinotropic_receptor_OS=Rattus_norvegicus_OX=10116_GN=Gpr119_PE=1_SV=1	aje:HCAG_07263	K01183_chitinase_[EC:3.2.1.14]_|_(RefSeq)_hypothetical_protein_(A)	NO
HiC_scaffold_2	10866726	intron_variant	NA	10858272	11037858	evm.model.000002F_PILON.194.2	XP_021346459.1	twitchin-like_isoform_X10__[Mizuhopecten_yessoensis]	sp|Q23551|UNC22_CAEEL	Twitchin_OS=Caenorhabditis_elegans_OX=6239_GN=unc-22_PE=1_SV=3	aplc:110985846	K12567_titin_[EC:2.7.11.1]_|_(RefSeq)_titin-like_(A)	YES
HiC_scaffold_2	10880216	intron_variant	NA	10858272	11037858	evm.model.000002F_PILON.194.2	XP_021346459.1	twitchin-like_isoform_X10__[Mizuhopecten_yessoensis]	sp|Q23551|UNC22_CAEEL	Twitchin_OS=Caenorhabditis_elegans_OX=6239_GN=unc-22_PE=1_SV=3	aplc:110985846	K12567_titin_[EC:2.7.11.1]_|_(RefSeq)_titin-like_(A)	YES
HiC_scaffold_2	10888019	intron_variant	NA	10858272	11037858	evm.model.000002F_PILON.194.2	XP_021346459.1	twitchin-like_isoform_X10__[Mizuhopecten_yessoensis]	sp|Q23551|UNC22_CAEEL	Twitchin_OS=Caenorhabditis_elegans_OX=6239_GN=unc-22_PE=1_SV=3	aplc:110985846	K12567_titin_[EC:2.7.11.1]_|_(RefSeq)_titin-like_(A)	YES
HiC_scaffold_2	10896621	intron_variant	NA	10858272	11037858	evm.model.000002F_PILON.194.2	XP_021346459.1	twitchin-like_isoform_X10__[Mizuhopecten_yessoensis]	sp|Q23551|UNC22_CAEEL	Twitchin_OS=Caenorhabditis_elegans_OX=6239_GN=unc-22_PE=1_SV=3	aplc:110985846	K12567_titin_[EC:2.7.11.1]_|_(RefSeq)_titin-like_(A)	YES
HiC_scaffold_2	23212627	upstream_gene_variant	NA	23131731	23216413	evm.model.000594F_PILON.27	OWF49861.1	Cubilin__[Mizuhopecten_yessoensis]	sp|Q9TU53|CUBN_CANLF	Cubilin_OS=Canis_lupus_familiaris_OX=9615_GN=CUBN_PE=1_SV=1	myi:110451136	K14616_cubilin_|_(RefSeq)_cubilin-like_(A)	YES
HiC_scaffold_2	23212566	upstream_gene_variant	NA	23131731	23216413	evm.model.000594F_PILON.27	OWF49861.1	Cubilin__[Mizuhopecten_yessoensis]	sp|Q9TU53|CUBN_CANLF	Cubilin_OS=Canis_lupus_familiaris_OX=9615_GN=CUBN_PE=1_SV=1	myi:110451136	K14616_cubilin_|_(RefSeq)_cubilin-like_(A)	YES
HiC_scaffold_2	23216543	upstream_gene_variant	NA	23131731	23216413	evm.model.000594F_PILON.27	OWF49861.1	Cubilin__[Mizuhopecten_yessoensis]	sp|Q9TU53|CUBN_CANLF	Cubilin_OS=Canis_lupus_familiaris_OX=9615_GN=CUBN_PE=1_SV=1	myi:110451136	K14616_cubilin_|_(RefSeq)_cubilin-like_(A)	NO
HiC_scaffold_2	23291315	intergenic_region	NA	23265103	23282569	evm.model.000594F_PILON.22	XP_021347452.1	uncharacterized_protein_LOC110446569_isoform_X3__[Mizuhopecten_yessoensis]	NA	NA	NA	NA	NO
HiC_scaffold_2	23291326	intergenic_region	NA	23265103	23282569	evm.model.000594F_PILON.22	XP_021347452.1	uncharacterized_protein_LOC110446569_isoform_X3__[Mizuhopecten_yessoensis]	NA	NA	NA	NA	NO
HiC_scaffold_2	23300461	intron_variant	NA	23298321	23324406	evm.model.000594F_PILON.21	XP_021347454.1	transforming_growth_factor_beta_receptor_type_3-like__[Mizuhopecten_yessoensis]	sp|P26342|TGBR3_RAT	Transforming_growth_factor_beta_receptor_type_3_OS=Rattus_norvegicus_OX=10116_GN=Tgfbr3_PE=1_SV=1	myi:110446572	K05843_transforming_growth_factor,_beta_receptor_III_|_(RefSeq)_transforming_growth_factor_beta_receptor_type_3-like_(A)	YES
HiC_scaffold_2	23300460	intron_variant	NA	23298321	23324406	evm.model.000594F_PILON.21	XP_021347454.1	transforming_growth_factor_beta_receptor_type_3-like__[Mizuhopecten_yessoensis]	sp|P26342|TGBR3_RAT	Transforming_growth_factor_beta_receptor_type_3_OS=Rattus_norvegicus_OX=10116_GN=Tgfbr3_PE=1_SV=1	myi:110446572	K05843_transforming_growth_factor,_beta_receptor_III_|_(RefSeq)_transforming_growth_factor_beta_receptor_type_3-like_(A)	YES
HiC_scaffold_2	23323662	intron_variant	NA	23298321	23324406	evm.model.000594F_PILON.21	XP_021347454.1	transforming_growth_factor_beta_receptor_type_3-like__[Mizuhopecten_yessoensis]	sp|P26342|TGBR3_RAT	Transforming_growth_factor_beta_receptor_type_3_OS=Rattus_norvegicus_OX=10116_GN=Tgfbr3_PE=1_SV=1	myi:110446572	K05843_transforming_growth_factor,_beta_receptor_III_|_(RefSeq)_transforming_growth_factor_beta_receptor_type_3-like_(A)	YES
HiC_scaffold_2	23323657	intron_variant	NA	23298321	23324406	evm.model.000594F_PILON.21	XP_021347454.1	transforming_growth_factor_beta_receptor_type_3-like__[Mizuhopecten_yessoensis]	sp|P26342|TGBR3_RAT	Transforming_growth_factor_beta_receptor_type_3_OS=Rattus_norvegicus_OX=10116_GN=Tgfbr3_PE=1_SV=1	myi:110446572	K05843_transforming_growth_factor,_beta_receptor_III_|_(RefSeq)_transforming_growth_factor_beta_receptor_type_3-like_(A)	YES
HiC_scaffold_2	23340621	downstream_gene_variant	NA	23333746	23337189	evm.model.000594F_PILON.20	XP_022201215.1	cysteine-rich,_acidic_integral_membrane_protein-like__[Nilaparvata_lugens]	sp|Q03650|CRAM_TRYBB	Cysteine-rich,_acidic_integral_membrane_protein_OS=Trypanosoma_brucei_brucei_OX=5702_GN=CRAM_PE=2_SV=1	cjo:107324155	K13106_pre-mRNA-splicing_factor_CWC26_|_(RefSeq)_BUD13;_BUD13_homolog_(A)	NO
HiC_scaffold_2	23340632	downstream_gene_variant	NA	23333746	23337189	evm.model.000594F_PILON.20	XP_022201215.1	cysteine-rich,_acidic_integral_membrane_protein-like__[Nilaparvata_lugens]	sp|Q03650|CRAM_TRYBB	Cysteine-rich,_acidic_integral_membrane_protein_OS=Trypanosoma_brucei_brucei_OX=5702_GN=CRAM_PE=2_SV=1	cjo:107324155	K13106_pre-mRNA-splicing_factor_CWC26_|_(RefSeq)_BUD13;_BUD13_homolog_(A)	NO
HiC_scaffold_2	23340601	downstream_gene_variant	NA	23333746	23337189	evm.model.000594F_PILON.20	XP_022201215.1	cysteine-rich,_acidic_integral_membrane_protein-like__[Nilaparvata_lugens]	sp|Q03650|CRAM_TRYBB	Cysteine-rich,_acidic_integral_membrane_protein_OS=Trypanosoma_brucei_brucei_OX=5702_GN=CRAM_PE=2_SV=1	cjo:107324155	K13106_pre-mRNA-splicing_factor_CWC26_|_(RefSeq)_BUD13;_BUD13_homolog_(A)	NO
HiC_scaffold_2	23340596	downstream_gene_variant	NA	23333746	23337189	evm.model.000594F_PILON.20	XP_022201215.1	cysteine-rich,_acidic_integral_membrane_protein-like__[Nilaparvata_lugens]	sp|Q03650|CRAM_TRYBB	Cysteine-rich,_acidic_integral_membrane_protein_OS=Trypanosoma_brucei_brucei_OX=5702_GN=CRAM_PE=2_SV=1	cjo:107324155	K13106_pre-mRNA-splicing_factor_CWC26_|_(RefSeq)_BUD13;_BUD13_homolog_(A)	NO
HiC_scaffold_2	23358464	intergenic_region	NA	23333746	23337189	evm.model.000594F_PILON.20	XP_022201215.1	cysteine-rich,_acidic_integral_membrane_protein-like__[Nilaparvata_lugens]	sp|Q03650|CRAM_TRYBB	Cysteine-rich,_acidic_integral_membrane_protein_OS=Trypanosoma_brucei_brucei_OX=5702_GN=CRAM_PE=2_SV=1	cjo:107324155	K13106_pre-mRNA-splicing_factor_CWC26_|_(RefSeq)_BUD13;_BUD13_homolog_(A)	NO
HiC_scaffold_2	23366442	intergenic_region	NA	23333746	23337189	evm.model.000594F_PILON.20	XP_022201215.1	cysteine-rich,_acidic_integral_membrane_protein-like__[Nilaparvata_lugens]	sp|Q03650|CRAM_TRYBB	Cysteine-rich,_acidic_integral_membrane_protein_OS=Trypanosoma_brucei_brucei_OX=5702_GN=CRAM_PE=2_SV=1	cjo:107324155	K13106_pre-mRNA-splicing_factor_CWC26_|_(RefSeq)_BUD13;_BUD13_homolog_(A)	NO
HiC_scaffold_2	23373573	intergenic_region	NA	23333746	23337189	evm.model.000594F_PILON.20	XP_022201215.1	cysteine-rich,_acidic_integral_membrane_protein-like__[Nilaparvata_lugens]	sp|Q03650|CRAM_TRYBB	Cysteine-rich,_acidic_integral_membrane_protein_OS=Trypanosoma_brucei_brucei_OX=5702_GN=CRAM_PE=2_SV=1	cjo:107324155	K13106_pre-mRNA-splicing_factor_CWC26_|_(RefSeq)_BUD13;_BUD13_homolog_(A)	NO
HiC_scaffold_2	23427132	intron_variant	NA	23421572	23462987	evm.model.000594F_PILON.15	XP_022324961.1	tetratricopeptide_repeat_protein_28-like_isoform_X4__[Crassostrea_virginica]	sp|Q80XJ3|TTC28_MOUSE	Tetratricopeptide_repeat_protein_28_OS=Mus_musculus_OX=10090_GN=Ttc28_PE=1_SV=3	xla:108714445	K15837_G-protein_signaling_modulator_2_|_(RefSeq)_G-protein-signaling_modulator_2-like_(A)	YES
HiC_scaffold_2	23427116	intron_variant	NA	23421572	23462987	evm.model.000594F_PILON.15	XP_022324961.1	tetratricopeptide_repeat_protein_28-like_isoform_X4__[Crassostrea_virginica]	sp|Q80XJ3|TTC28_MOUSE	Tetratricopeptide_repeat_protein_28_OS=Mus_musculus_OX=10090_GN=Ttc28_PE=1_SV=3	xla:108714445	K15837_G-protein_signaling_modulator_2_|_(RefSeq)_G-protein-signaling_modulator_2-like_(A)	YES
HiC_scaffold_2	23434156	intron_variant	NA	23421572	23462987	evm.model.000594F_PILON.15	XP_022324961.1	tetratricopeptide_repeat_protein_28-like_isoform_X4__[Crassostrea_virginica]	sp|Q80XJ3|TTC28_MOUSE	Tetratricopeptide_repeat_protein_28_OS=Mus_musculus_OX=10090_GN=Ttc28_PE=1_SV=3	xla:108714445	K15837_G-protein_signaling_modulator_2_|_(RefSeq)_G-protein-signaling_modulator_2-like_(A)	YES
HiC_scaffold_2	23434147	intron_variant	NA	23421572	23462987	evm.model.000594F_PILON.15	XP_022324961.1	tetratricopeptide_repeat_protein_28-like_isoform_X4__[Crassostrea_virginica]	sp|Q80XJ3|TTC28_MOUSE	Tetratricopeptide_repeat_protein_28_OS=Mus_musculus_OX=10090_GN=Ttc28_PE=1_SV=3	xla:108714445	K15837_G-protein_signaling_modulator_2_|_(RefSeq)_G-protein-signaling_modulator_2-like_(A)	YES
HiC_scaffold_2	23446558	intron_variant	NA	23421572	23462987	evm.model.000594F_PILON.15	XP_022324961.1	tetratricopeptide_repeat_protein_28-like_isoform_X4__[Crassostrea_virginica]	sp|Q80XJ3|TTC28_MOUSE	Tetratricopeptide_repeat_protein_28_OS=Mus_musculus_OX=10090_GN=Ttc28_PE=1_SV=3	xla:108714445	K15837_G-protein_signaling_modulator_2_|_(RefSeq)_G-protein-signaling_modulator_2-like_(A)	YES
HiC_scaffold_2	23490703	intron_variant	NA	23481005	23490786	evm.model.000594F_PILON.14	WP_116511668.1	DUF3494_domain-containing_protein__[Streptomyces_sp._AcE210]	NA	NA	els:105028552	K06792_aggrecan_1_|_(RefSeq)_acan;_aggrecan_core_protein_(A)	YES
HiC_scaffold_2	23490733	missense_variant	MODERATE	23481005	23490786	evm.model.000594F_PILON.14	WP_116511668.1	DUF3494_domain-containing_protein__[Streptomyces_sp._AcE210]	NA	NA	els:105028552	K06792_aggrecan_1_|_(RefSeq)_acan;_aggrecan_core_protein_(A)	YES
HiC_scaffold_2	23490690	intron_variant	NA	23481005	23490786	evm.model.000594F_PILON.14	WP_116511668.1	DUF3494_domain-containing_protein__[Streptomyces_sp._AcE210]	NA	NA	els:105028552	K06792_aggrecan_1_|_(RefSeq)_acan;_aggrecan_core_protein_(A)	YES
HiC_scaffold_2	23490682	intron_variant	NA	23481005	23490786	evm.model.000594F_PILON.14	WP_116511668.1	DUF3494_domain-containing_protein__[Streptomyces_sp._AcE210]	NA	NA	els:105028552	K06792_aggrecan_1_|_(RefSeq)_acan;_aggrecan_core_protein_(A)	YES
HiC_scaffold_2	23490662	intron_variant	NA	23481005	23490786	evm.model.000594F_PILON.14	WP_116511668.1	DUF3494_domain-containing_protein__[Streptomyces_sp._AcE210]	NA	NA	els:105028552	K06792_aggrecan_1_|_(RefSeq)_acan;_aggrecan_core_protein_(A)	YES
HiC_scaffold_2	23497855	intergenic_region	NA	23481005	23490786	evm.model.000594F_PILON.14	WP_116511668.1	DUF3494_domain-containing_protein__[Streptomyces_sp._AcE210]	NA	NA	els:105028552	K06792_aggrecan_1_|_(RefSeq)_acan;_aggrecan_core_protein_(A)	NO
HiC_scaffold_2	23529226	intron_variant	NA	23525542	23550039	evm.model.000594F_PILON.12	AXN93520.1	LRYamide__[Mizuhopecten_yessoensis]	NA	NA	NA	NA	YES
HiC_scaffold_2	23529183	intron_variant	NA	23525542	23550039	evm.model.000594F_PILON.12	AXN93520.1	LRYamide__[Mizuhopecten_yessoensis]	NA	NA	NA	NA	YES
HiC_scaffold_2	23529177	intron_variant	NA	23525542	23550039	evm.model.000594F_PILON.12	AXN93520.1	LRYamide__[Mizuhopecten_yessoensis]	NA	NA	NA	NA	YES
HiC_scaffold_2	23556938	intergenic_region	NA	23525542	23550039	evm.model.000594F_PILON.12	AXN93520.1	LRYamide__[Mizuhopecten_yessoensis]	NA	NA	NA	NA	NO
HiC_scaffold_2	23578189	intergenic_region	NA	23525542	23550039	evm.model.000594F_PILON.12	AXN93520.1	LRYamide__[Mizuhopecten_yessoensis]	NA	NA	NA	NA	NO
HiC_scaffold_2	23578182	intergenic_region	NA	23525542	23550039	evm.model.000594F_PILON.12	AXN93520.1	LRYamide__[Mizuhopecten_yessoensis]	NA	NA	NA	NA	NO
HiC_scaffold_2	23592105	intergenic_region	NA	23525542	23550039	evm.model.000594F_PILON.12	AXN93520.1	LRYamide__[Mizuhopecten_yessoensis]	NA	NA	NA	NA	NO
HiC_scaffold_2	23592096	intergenic_region	NA	23525542	23550039	evm.model.000594F_PILON.12	AXN93520.1	LRYamide__[Mizuhopecten_yessoensis]	NA	NA	NA	NA	NO
HiC_scaffold_2	23935492	intergenic_region	NA	23927500	23929603	evm.model.000376F_PILON.8	XP_021354451.1	thyroglobulin-like__[Mizuhopecten_yessoensis]	sp|P01266|THYG_HUMAN	Thyroglobulin_OS=Homo_sapiens_OX=9606_GN=TG_PE=1_SV=5	adf:107342837	K10809_thyroglobulin_|_(RefSeq)_uncharacterized_LOC107342837_(A)	NO
HiC_scaffold_2	23935473	intergenic_region	NA	23927500	23929603	evm.model.000376F_PILON.8	XP_021354451.1	thyroglobulin-like__[Mizuhopecten_yessoensis]	sp|P01266|THYG_HUMAN	Thyroglobulin_OS=Homo_sapiens_OX=9606_GN=TG_PE=1_SV=5	adf:107342837	K10809_thyroglobulin_|_(RefSeq)_uncharacterized_LOC107342837_(A)	NO
HiC_scaffold_2	23935466	intergenic_region	NA	23927500	23929603	evm.model.000376F_PILON.8	XP_021354451.1	thyroglobulin-like__[Mizuhopecten_yessoensis]	sp|P01266|THYG_HUMAN	Thyroglobulin_OS=Homo_sapiens_OX=9606_GN=TG_PE=1_SV=5	adf:107342837	K10809_thyroglobulin_|_(RefSeq)_uncharacterized_LOC107342837_(A)	NO
HiC_scaffold_2	23941986	intergenic_region	NA	23927500	23929603	evm.model.000376F_PILON.8	XP_021354451.1	thyroglobulin-like__[Mizuhopecten_yessoensis]	sp|P01266|THYG_HUMAN	Thyroglobulin_OS=Homo_sapiens_OX=9606_GN=TG_PE=1_SV=5	adf:107342837	K10809_thyroglobulin_|_(RefSeq)_uncharacterized_LOC107342837_(A)	NO
HiC_scaffold_2	23941987	intergenic_region	NA	23927500	23929603	evm.model.000376F_PILON.8	XP_021354451.1	thyroglobulin-like__[Mizuhopecten_yessoensis]	sp|P01266|THYG_HUMAN	Thyroglobulin_OS=Homo_sapiens_OX=9606_GN=TG_PE=1_SV=5	adf:107342837	K10809_thyroglobulin_|_(RefSeq)_uncharacterized_LOC107342837_(A)	NO
HiC_scaffold_2	23941959	intergenic_region	NA	23927500	23929603	evm.model.000376F_PILON.8	XP_021354451.1	thyroglobulin-like__[Mizuhopecten_yessoensis]	sp|P01266|THYG_HUMAN	Thyroglobulin_OS=Homo_sapiens_OX=9606_GN=TG_PE=1_SV=5	adf:107342837	K10809_thyroglobulin_|_(RefSeq)_uncharacterized_LOC107342837_(A)	NO
HiC_scaffold_2	23941949	intergenic_region	NA	23927500	23929603	evm.model.000376F_PILON.8	XP_021354451.1	thyroglobulin-like__[Mizuhopecten_yessoensis]	sp|P01266|THYG_HUMAN	Thyroglobulin_OS=Homo_sapiens_OX=9606_GN=TG_PE=1_SV=5	adf:107342837	K10809_thyroglobulin_|_(RefSeq)_uncharacterized_LOC107342837_(A)	NO
HiC_scaffold_2	23941943	intergenic_region	NA	23927500	23929603	evm.model.000376F_PILON.8	XP_021354451.1	thyroglobulin-like__[Mizuhopecten_yessoensis]	sp|P01266|THYG_HUMAN	Thyroglobulin_OS=Homo_sapiens_OX=9606_GN=TG_PE=1_SV=5	adf:107342837	K10809_thyroglobulin_|_(RefSeq)_uncharacterized_LOC107342837_(A)	NO
HiC_scaffold_2	23941939	intergenic_region	NA	23927500	23929603	evm.model.000376F_PILON.8	XP_021354451.1	thyroglobulin-like__[Mizuhopecten_yessoensis]	sp|P01266|THYG_HUMAN	Thyroglobulin_OS=Homo_sapiens_OX=9606_GN=TG_PE=1_SV=5	adf:107342837	K10809_thyroglobulin_|_(RefSeq)_uncharacterized_LOC107342837_(A)	NO
HiC_scaffold_2	23970437	intergenic_region	NA	23927500	23929603	evm.model.000376F_PILON.8	XP_021354451.1	thyroglobulin-like__[Mizuhopecten_yessoensis]	sp|P01266|THYG_HUMAN	Thyroglobulin_OS=Homo_sapiens_OX=9606_GN=TG_PE=1_SV=5	adf:107342837	K10809_thyroglobulin_|_(RefSeq)_uncharacterized_LOC107342837_(A)	NO
HiC_scaffold_2	23996173	intron_variant	NA	23990267	24018986	evm.model.000376F_PILON.10	OWF36259.1	Polycystic_kidney_disease_protein_1-like_2__[Mizuhopecten_yessoensis]	sp|Q7TN88|PK1L2_MOUSE	Polycystic_kidney_disease_protein_1-like_2_OS=Mus_musculus_OX=10090_GN=Pkd1l2_PE=2_SV=1	myi:110441912	K04988_polycystin_1L2_|_(RefSeq)_polycystic_kidney_disease_protein_1-like_2_(A)	YES
HiC_scaffold_2	24157501	intron_variant	NA	24151979	24180190	evm.model.000376F_PILON.18	XP_022341874.1	LOW_QUALITY_PROTEIN:_centrosomal_protein_of_70_kDa-like__[Crassostrea_virginica]	sp|Q8NHQ1|CEP70_HUMAN	Centrosomal_protein_of_70_kDa_OS=Homo_sapiens_OX=9606_GN=CEP70_PE=1_SV=2	crg:105341395	K16802_centrosomal_protein_CEP70_|_(RefSeq)_centrosomal_protein_of_70_kDa_isoform_X1_(A)	YES
HiC_scaffold_2	24178375	synonymous_variant	LOW	24151979	24180190	evm.model.000376F_PILON.18	XP_022341874.1	LOW_QUALITY_PROTEIN:_centrosomal_protein_of_70_kDa-like__[Crassostrea_virginica]	sp|Q8NHQ1|CEP70_HUMAN	Centrosomal_protein_of_70_kDa_OS=Homo_sapiens_OX=9606_GN=CEP70_PE=1_SV=2	crg:105341395	K16802_centrosomal_protein_CEP70_|_(RefSeq)_centrosomal_protein_of_70_kDa_isoform_X1_(A)	YES
HiC_scaffold_2	24181618	missense_variant	MODERATE	24181282	24185671	evm.model.000376F_PILON.19	XP_021374889.1	uncharacterized_protein_LOC110464150_isoform_X1__[Mizuhopecten_yessoensis]	sp|Q9GZS9|CHST5_HUMAN	Carbohydrate_sulfotransferase_5_OS=Homo_sapiens_OX=9606_GN=CHST5_PE=2_SV=3	myi:110459039	K01022_keratan_sulfate_6-sulfotransferase_1_[EC:2.8.2.21]_|_(RefSeq)_carbohydrate_sulfotransferase_1-like_isoform_X1_(A)	YES
HiC_scaffold_2	24181633	synonymous_variant	LOW	24181282	24185671	evm.model.000376F_PILON.19	XP_021374889.1	uncharacterized_protein_LOC110464150_isoform_X1__[Mizuhopecten_yessoensis]	sp|Q9GZS9|CHST5_HUMAN	Carbohydrate_sulfotransferase_5_OS=Homo_sapiens_OX=9606_GN=CHST5_PE=2_SV=3	myi:110459039	K01022_keratan_sulfate_6-sulfotransferase_1_[EC:2.8.2.21]_|_(RefSeq)_carbohydrate_sulfotransferase_1-like_isoform_X1_(A)	YES
HiC_scaffold_2	24185179	downstream_gene_variant	NA	24181282	24185671	evm.model.000376F_PILON.19	XP_021374889.1	uncharacterized_protein_LOC110464150_isoform_X1__[Mizuhopecten_yessoensis]	sp|Q9GZS9|CHST5_HUMAN	Carbohydrate_sulfotransferase_5_OS=Homo_sapiens_OX=9606_GN=CHST5_PE=2_SV=3	myi:110459039	K01022_keratan_sulfate_6-sulfotransferase_1_[EC:2.8.2.21]_|_(RefSeq)_carbohydrate_sulfotransferase_1-like_isoform_X1_(A)	YES
HiC_scaffold_2	24870913	upstream_gene_variant	NA	24864616	24867871	evm.model.001044F_PILON.8	XP_010638760.1	PREDICTED:_mucin-5AC__[Fukomys_damarensis]	sp|Q8ILR9|YPF17_PLAF7	Protein_PF14_0175_OS=Plasmodium_falciparum_(isolate_3D7)_OX=36329_GN=PF14_0175_PE=1_SV=1	fab:101812001	K17285_selenium-binding_protein_1_|_(RefSeq)_SELENBP1;_selenium_binding_protein_1_(A)	NO
HiC_scaffold_2	24884441	intron_variant	NA	24882851	24888448	evm.model.001044F_PILON.9	XP_021367509.1	barH-like_1_homeobox_protein__[Mizuhopecten_yessoensis]	sp|Q9BZE3|BARH1_HUMAN	BarH-like_1_homeobox_protein_OS=Homo_sapiens_OX=9606_GN=BARHL1_PE=2_SV=1	myi:110459528	K09360_BarH-like_|_(RefSeq)_barH-like_1_homeobox_protein_(A)	YES
HiC_scaffold_2	24884443	intron_variant	NA	24882851	24888448	evm.model.001044F_PILON.9	XP_021367509.1	barH-like_1_homeobox_protein__[Mizuhopecten_yessoensis]	sp|Q9BZE3|BARH1_HUMAN	BarH-like_1_homeobox_protein_OS=Homo_sapiens_OX=9606_GN=BARHL1_PE=2_SV=1	myi:110459528	K09360_BarH-like_|_(RefSeq)_barH-like_1_homeobox_protein_(A)	YES
HiC_scaffold_2	24884394	intron_variant	NA	24882851	24888448	evm.model.001044F_PILON.9	XP_021367509.1	barH-like_1_homeobox_protein__[Mizuhopecten_yessoensis]	sp|Q9BZE3|BARH1_HUMAN	BarH-like_1_homeobox_protein_OS=Homo_sapiens_OX=9606_GN=BARHL1_PE=2_SV=1	myi:110459528	K09360_BarH-like_|_(RefSeq)_barH-like_1_homeobox_protein_(A)	YES
HiC_scaffold_2	24891613	downstream_gene_variant	NA	24882851	24888448	evm.model.001044F_PILON.9	XP_021367509.1	barH-like_1_homeobox_protein__[Mizuhopecten_yessoensis]	sp|Q9BZE3|BARH1_HUMAN	BarH-like_1_homeobox_protein_OS=Homo_sapiens_OX=9606_GN=BARHL1_PE=2_SV=1	myi:110459528	K09360_BarH-like_|_(RefSeq)_barH-like_1_homeobox_protein_(A)	NO
HiC_scaffold_2	24910245	intergenic_region	NA	24882851	24888448	evm.model.001044F_PILON.9	XP_021367509.1	barH-like_1_homeobox_protein__[Mizuhopecten_yessoensis]	sp|Q9BZE3|BARH1_HUMAN	BarH-like_1_homeobox_protein_OS=Homo_sapiens_OX=9606_GN=BARHL1_PE=2_SV=1	myi:110459528	K09360_BarH-like_|_(RefSeq)_barH-like_1_homeobox_protein_(A)	NO
HiC_scaffold_2	24910215	intergenic_region	NA	24882851	24888448	evm.model.001044F_PILON.9	XP_021367509.1	barH-like_1_homeobox_protein__[Mizuhopecten_yessoensis]	sp|Q9BZE3|BARH1_HUMAN	BarH-like_1_homeobox_protein_OS=Homo_sapiens_OX=9606_GN=BARHL1_PE=2_SV=1	myi:110459528	K09360_BarH-like_|_(RefSeq)_barH-like_1_homeobox_protein_(A)	NO
HiC_scaffold_2	24910210	intergenic_region	NA	24882851	24888448	evm.model.001044F_PILON.9	XP_021367509.1	barH-like_1_homeobox_protein__[Mizuhopecten_yessoensis]	sp|Q9BZE3|BARH1_HUMAN	BarH-like_1_homeobox_protein_OS=Homo_sapiens_OX=9606_GN=BARHL1_PE=2_SV=1	myi:110459528	K09360_BarH-like_|_(RefSeq)_barH-like_1_homeobox_protein_(A)	NO
HiC_scaffold_2	24945697	intergenic_region	NA	24916515	24918097	evm.model.001044F_PILON.11	XP_008017802.1	PREDICTED:_uncharacterized_protein_DKFZp434B061-like_isoform_X1__[Chlorocebus_sabaeus]	sp|Q9UF83|YM012_HUMAN	Uncharacterized_protein_DKFZp434B061_OS=Homo_sapiens_OX=9606_PE=2_SV=2	oaa:103164821	K20780_mediator_of_DNA_damage_checkpoint_protein_1_|_(RefSeq)_MDC1;_mediator_of_DNA_damage_checkpoint_protein_1_isoform_X1_(A)	NO
HiC_scaffold_2	24945686	intergenic_region	NA	24916515	24918097	evm.model.001044F_PILON.11	XP_008017802.1	PREDICTED:_uncharacterized_protein_DKFZp434B061-like_isoform_X1__[Chlorocebus_sabaeus]	sp|Q9UF83|YM012_HUMAN	Uncharacterized_protein_DKFZp434B061_OS=Homo_sapiens_OX=9606_PE=2_SV=2	oaa:103164821	K20780_mediator_of_DNA_damage_checkpoint_protein_1_|_(RefSeq)_MDC1;_mediator_of_DNA_damage_checkpoint_protein_1_isoform_X1_(A)	NO
HiC_scaffold_2	24975010	downstream_gene_variant	NA	24916515	24918097	evm.model.001044F_PILON.11	XP_008017802.1	PREDICTED:_uncharacterized_protein_DKFZp434B061-like_isoform_X1__[Chlorocebus_sabaeus]	sp|Q9UF83|YM012_HUMAN	Uncharacterized_protein_DKFZp434B061_OS=Homo_sapiens_OX=9606_PE=2_SV=2	oaa:103164821	K20780_mediator_of_DNA_damage_checkpoint_protein_1_|_(RefSeq)_MDC1;_mediator_of_DNA_damage_checkpoint_protein_1_isoform_X1_(A)	NO
HiC_scaffold_2	24975000	downstream_gene_variant	NA	24916515	24918097	evm.model.001044F_PILON.11	XP_008017802.1	PREDICTED:_uncharacterized_protein_DKFZp434B061-like_isoform_X1__[Chlorocebus_sabaeus]	sp|Q9UF83|YM012_HUMAN	Uncharacterized_protein_DKFZp434B061_OS=Homo_sapiens_OX=9606_PE=2_SV=2	oaa:103164821	K20780_mediator_of_DNA_damage_checkpoint_protein_1_|_(RefSeq)_MDC1;_mediator_of_DNA_damage_checkpoint_protein_1_isoform_X1_(A)	NO
HiC_scaffold_2	24974989	downstream_gene_variant	NA	24916515	24918097	evm.model.001044F_PILON.11	XP_008017802.1	PREDICTED:_uncharacterized_protein_DKFZp434B061-like_isoform_X1__[Chlorocebus_sabaeus]	sp|Q9UF83|YM012_HUMAN	Uncharacterized_protein_DKFZp434B061_OS=Homo_sapiens_OX=9606_PE=2_SV=2	oaa:103164821	K20780_mediator_of_DNA_damage_checkpoint_protein_1_|_(RefSeq)_MDC1;_mediator_of_DNA_damage_checkpoint_protein_1_isoform_X1_(A)	NO
HiC_scaffold_2	24997647	intergenic_region	NA	24979783	24991602	evm.model.001044F_PILON.13	XP_021363064.1	homeobox_protein_ceh-31-like__[Mizuhopecten_yessoensis]	sp|Q9BZE3|BARH1_HUMAN	BarH-like_1_homeobox_protein_OS=Homo_sapiens_OX=9606_GN=BARHL1_PE=2_SV=1	myi:110456574	K09360_BarH-like_|_(RefSeq)_homeobox_protein_ceh-31-like_(A)	NO
HiC_scaffold_2	25567459	synonymous_variant	LOW	25562914	25599644	evm.model.000743F_PILON.25	OWF49906.1	Macrophage_mannose_receptor_1__[Mizuhopecten_yessoensis]	sp|Q61830|MRC1_MOUSE	Macrophage_mannose_receptor_1_OS=Mus_musculus_OX=10090_GN=Mrc1_PE=1_SV=2	myi:110451068	K06560_mannose_receptor,_C_type_|_(RefSeq)_macrophage_mannose_receptor_1-like_isoform_X1_(A)	YES
HiC_scaffold_2	25567435	synonymous_variant	LOW	25562914	25599644	evm.model.000743F_PILON.25	OWF49906.1	Macrophage_mannose_receptor_1__[Mizuhopecten_yessoensis]	sp|Q61830|MRC1_MOUSE	Macrophage_mannose_receptor_1_OS=Mus_musculus_OX=10090_GN=Mrc1_PE=1_SV=2	myi:110451068	K06560_mannose_receptor,_C_type_|_(RefSeq)_macrophage_mannose_receptor_1-like_isoform_X1_(A)	YES
HiC_scaffold_2	25567417	synonymous_variant	LOW	25562914	25599644	evm.model.000743F_PILON.25	OWF49906.1	Macrophage_mannose_receptor_1__[Mizuhopecten_yessoensis]	sp|Q61830|MRC1_MOUSE	Macrophage_mannose_receptor_1_OS=Mus_musculus_OX=10090_GN=Mrc1_PE=1_SV=2	myi:110451068	K06560_mannose_receptor,_C_type_|_(RefSeq)_macrophage_mannose_receptor_1-like_isoform_X1_(A)	YES
HiC_scaffold_2	25572807	intron_variant	NA	25562914	25599644	evm.model.000743F_PILON.25	OWF49906.1	Macrophage_mannose_receptor_1__[Mizuhopecten_yessoensis]	sp|Q61830|MRC1_MOUSE	Macrophage_mannose_receptor_1_OS=Mus_musculus_OX=10090_GN=Mrc1_PE=1_SV=2	myi:110451068	K06560_mannose_receptor,_C_type_|_(RefSeq)_macrophage_mannose_receptor_1-like_isoform_X1_(A)	YES
HiC_scaffold_2	25582211	splice_region_variant&intron_variant	LOW	25562914	25599644	evm.model.000743F_PILON.25	OWF49906.1	Macrophage_mannose_receptor_1__[Mizuhopecten_yessoensis]	sp|Q61830|MRC1_MOUSE	Macrophage_mannose_receptor_1_OS=Mus_musculus_OX=10090_GN=Mrc1_PE=1_SV=2	myi:110451068	K06560_mannose_receptor,_C_type_|_(RefSeq)_macrophage_mannose_receptor_1-like_isoform_X1_(A)	YES
HiC_scaffold_2	25582208	splice_region_variant&intron_variant	LOW	25562914	25599644	evm.model.000743F_PILON.25	OWF49906.1	Macrophage_mannose_receptor_1__[Mizuhopecten_yessoensis]	sp|Q61830|MRC1_MOUSE	Macrophage_mannose_receptor_1_OS=Mus_musculus_OX=10090_GN=Mrc1_PE=1_SV=2	myi:110451068	K06560_mannose_receptor,_C_type_|_(RefSeq)_macrophage_mannose_receptor_1-like_isoform_X1_(A)	YES
HiC_scaffold_2	25594640	intron_variant	NA	25562914	25599644	evm.model.000743F_PILON.25	OWF49906.1	Macrophage_mannose_receptor_1__[Mizuhopecten_yessoensis]	sp|Q61830|MRC1_MOUSE	Macrophage_mannose_receptor_1_OS=Mus_musculus_OX=10090_GN=Mrc1_PE=1_SV=2	myi:110451068	K06560_mannose_receptor,_C_type_|_(RefSeq)_macrophage_mannose_receptor_1-like_isoform_X1_(A)	YES
HiC_scaffold_2	25594628	intron_variant	NA	25562914	25599644	evm.model.000743F_PILON.25	OWF49906.1	Macrophage_mannose_receptor_1__[Mizuhopecten_yessoensis]	sp|Q61830|MRC1_MOUSE	Macrophage_mannose_receptor_1_OS=Mus_musculus_OX=10090_GN=Mrc1_PE=1_SV=2	myi:110451068	K06560_mannose_receptor,_C_type_|_(RefSeq)_macrophage_mannose_receptor_1-like_isoform_X1_(A)	YES
HiC_scaffold_2	26608135	synonymous_variant	LOW	26570228	26619714	evm.model.000045F_PILON.26	XP_021347801.1	serine/arginine_repetitive_matrix_protein_2-like_isoform_X1__[Mizuhopecten_yessoensis]	sp|A2AR02|PPIG_MOUSE	Peptidyl-prolyl_cis-trans_isomerase_G_OS=Mus_musculus_OX=10090_GN=Ppig_PE=1_SV=1	crg:105328321	K09566_peptidyl-prolyl_isomerase_G_(cyclophilin_G)_[EC:5.2.1.8]_|_(RefSeq)_peptidyl-prolyl_cis-trans_isomerase_G_(A)	YES
HiC_scaffold_2	26608150	synonymous_variant	LOW	26570228	26619714	evm.model.000045F_PILON.26	XP_021347801.1	serine/arginine_repetitive_matrix_protein_2-like_isoform_X1__[Mizuhopecten_yessoensis]	sp|A2AR02|PPIG_MOUSE	Peptidyl-prolyl_cis-trans_isomerase_G_OS=Mus_musculus_OX=10090_GN=Ppig_PE=1_SV=1	crg:105328321	K09566_peptidyl-prolyl_isomerase_G_(cyclophilin_G)_[EC:5.2.1.8]_|_(RefSeq)_peptidyl-prolyl_cis-trans_isomerase_G_(A)	YES
HiC_scaffold_2	26632879	upstream_gene_variant	NA	26623149	26629506	evm.model.000045F_PILON.28	NA	NA	NA	NA	NA	NA	NO
HiC_scaffold_2	26668386	synonymous_variant	LOW	26653072	26690599	evm.model.000045F_PILON.30	XP_021347808.1	transcriptional_activator_GLI3-like__[Mizuhopecten_yessoensis]	sp|Q91660|GLI3_XENLA	Zinc_finger_protein_GLI3_OS=Xenopus_laevis_OX=8355_GN=gli3_PE=2_SV=1	myi:110446821	K16798_zinc_finger_protein_GLI2_|_(RefSeq)_transcriptional_activator_GLI3-like_(A)	YES
HiC_scaffold_2	26668345	intron_variant	NA	26653072	26690599	evm.model.000045F_PILON.30	XP_021347808.1	transcriptional_activator_GLI3-like__[Mizuhopecten_yessoensis]	sp|Q91660|GLI3_XENLA	Zinc_finger_protein_GLI3_OS=Xenopus_laevis_OX=8355_GN=gli3_PE=2_SV=1	myi:110446821	K16798_zinc_finger_protein_GLI2_|_(RefSeq)_transcriptional_activator_GLI3-like_(A)	YES
HiC_scaffold_2	26754374	intergenic_region	NA	26653072	26690599	evm.model.000045F_PILON.30	XP_021347808.1	transcriptional_activator_GLI3-like__[Mizuhopecten_yessoensis]	sp|Q91660|GLI3_XENLA	Zinc_finger_protein_GLI3_OS=Xenopus_laevis_OX=8355_GN=gli3_PE=2_SV=1	myi:110446821	K16798_zinc_finger_protein_GLI2_|_(RefSeq)_transcriptional_activator_GLI3-like_(A)	NO
HiC_scaffold_2	26754371	intergenic_region	NA	26653072	26690599	evm.model.000045F_PILON.30	XP_021347808.1	transcriptional_activator_GLI3-like__[Mizuhopecten_yessoensis]	sp|Q91660|GLI3_XENLA	Zinc_finger_protein_GLI3_OS=Xenopus_laevis_OX=8355_GN=gli3_PE=2_SV=1	myi:110446821	K16798_zinc_finger_protein_GLI2_|_(RefSeq)_transcriptional_activator_GLI3-like_(A)	NO
HiC_scaffold_2	26756972	intergenic_region	NA	26653072	26690599	evm.model.000045F_PILON.30	XP_021347808.1	transcriptional_activator_GLI3-like__[Mizuhopecten_yessoensis]	sp|Q91660|GLI3_XENLA	Zinc_finger_protein_GLI3_OS=Xenopus_laevis_OX=8355_GN=gli3_PE=2_SV=1	myi:110446821	K16798_zinc_finger_protein_GLI2_|_(RefSeq)_transcriptional_activator_GLI3-like_(A)	NO
HiC_scaffold_2	26756986	intergenic_region	NA	26653072	26690599	evm.model.000045F_PILON.30	XP_021347808.1	transcriptional_activator_GLI3-like__[Mizuhopecten_yessoensis]	sp|Q91660|GLI3_XENLA	Zinc_finger_protein_GLI3_OS=Xenopus_laevis_OX=8355_GN=gli3_PE=2_SV=1	myi:110446821	K16798_zinc_finger_protein_GLI2_|_(RefSeq)_transcriptional_activator_GLI3-like_(A)	NO
HiC_scaffold_2	26764686	upstream_gene_variant	NA	26653072	26690599	evm.model.000045F_PILON.30	XP_021347808.1	transcriptional_activator_GLI3-like__[Mizuhopecten_yessoensis]	sp|Q91660|GLI3_XENLA	Zinc_finger_protein_GLI3_OS=Xenopus_laevis_OX=8355_GN=gli3_PE=2_SV=1	myi:110446821	K16798_zinc_finger_protein_GLI2_|_(RefSeq)_transcriptional_activator_GLI3-like_(A)	NO
HiC_scaffold_2	26764715	upstream_gene_variant	NA	26653072	26690599	evm.model.000045F_PILON.30	XP_021347808.1	transcriptional_activator_GLI3-like__[Mizuhopecten_yessoensis]	sp|Q91660|GLI3_XENLA	Zinc_finger_protein_GLI3_OS=Xenopus_laevis_OX=8355_GN=gli3_PE=2_SV=1	myi:110446821	K16798_zinc_finger_protein_GLI2_|_(RefSeq)_transcriptional_activator_GLI3-like_(A)	NO
HiC_scaffold_2	26764716	upstream_gene_variant	NA	26653072	26690599	evm.model.000045F_PILON.30	XP_021347808.1	transcriptional_activator_GLI3-like__[Mizuhopecten_yessoensis]	sp|Q91660|GLI3_XENLA	Zinc_finger_protein_GLI3_OS=Xenopus_laevis_OX=8355_GN=gli3_PE=2_SV=1	myi:110446821	K16798_zinc_finger_protein_GLI2_|_(RefSeq)_transcriptional_activator_GLI3-like_(A)	NO
HiC_scaffold_2	26787826	intergenic_region	NA	26765288	26767797	evm.model.000045F_PILON.35	NA	NA	NA	NA	mgp:100543652	K07609_nestin_|_(RefSeq)_NES;_nestin_(A)	NO
HiC_scaffold_2	26787827	intergenic_region	NA	26765288	26767797	evm.model.000045F_PILON.35	NA	NA	NA	NA	mgp:100543652	K07609_nestin_|_(RefSeq)_NES;_nestin_(A)	NO
HiC_scaffold_2	26787766	intergenic_region	NA	26765288	26767797	evm.model.000045F_PILON.35	NA	NA	NA	NA	mgp:100543652	K07609_nestin_|_(RefSeq)_NES;_nestin_(A)	NO
HiC_scaffold_2	26795918	intergenic_region	NA	26765288	26767797	evm.model.000045F_PILON.35	NA	NA	NA	NA	mgp:100543652	K07609_nestin_|_(RefSeq)_NES;_nestin_(A)	NO
HiC_scaffold_2	26795869	intergenic_region	NA	26765288	26767797	evm.model.000045F_PILON.35	NA	NA	NA	NA	mgp:100543652	K07609_nestin_|_(RefSeq)_NES;_nestin_(A)	NO
HiC_scaffold_2	26795862	intergenic_region	NA	26765288	26767797	evm.model.000045F_PILON.35	NA	NA	NA	NA	mgp:100543652	K07609_nestin_|_(RefSeq)_NES;_nestin_(A)	NO
HiC_scaffold_2	26795860	intergenic_region	NA	26765288	26767797	evm.model.000045F_PILON.35	NA	NA	NA	NA	mgp:100543652	K07609_nestin_|_(RefSeq)_NES;_nestin_(A)	NO
HiC_scaffold_2	27302491	intron_variant	NA	27300488	27303134	evm.model.000045F_PILON.80	PIK49018.1	hypothetical_protein_BSL78_14124__[Apostichopus_japonicus]	sp|Q99PL5|RRBP1_MOUSE	Ribosome-binding_protein_1_OS=Mus_musculus_OX=10090_GN=Rrbp1_PE=1_SV=2	sasa:106571056	K03006_DNA-directed_RNA_polymerase_II_subunit_RPB1_[EC:2.7.7.6]_|_(RefSeq)_putative_protein_TPRXL_(A)	YES
HiC_scaffold_2	27331708	upstream_gene_variant	NA	27310322	27332577	evm.model.000045F_PILON.82	XP_021378699.1	E3_ubiquitin-protein_ligase_RFWD2-like__[Mizuhopecten_yessoensis]	sp|Q9R1A8|COP1_MOUSE	E3_ubiquitin-protein_ligase_COP1_OS=Mus_musculus_OX=10090_GN=Cop1_PE=1_SV=2	myi:110466495	K10143_E3_ubiquitin-protein_ligase_RFWD2_[EC:2.3.2.27]_|_(RefSeq)_E3_ubiquitin-protein_ligase_RFWD2-like_(A)	YES
HiC_scaffold_2	27374635	intron_variant	NA	27353695	27423559	evm.model.000045F_PILON.86	XP_021378644.1	guanine_nucleotide_exchange_factor_VAV2-like_isoform_X6__[Mizuhopecten_yessoensis]	sp|P52735|VAV2_HUMAN	Guanine_nucleotide_exchange_factor_VAV2_OS=Homo_sapiens_OX=9606_GN=VAV2_PE=1_SV=2	myi:110466438	K05730_guanine_nucleotide_exchange_factor_VAV_|_(RefSeq)_guanine_nucleotide_exchange_factor_VAV2-like_isoform_X1_(A)	YES
HiC_scaffold_2	27374656	intron_variant	NA	27353695	27423559	evm.model.000045F_PILON.86	XP_021378644.1	guanine_nucleotide_exchange_factor_VAV2-like_isoform_X6__[Mizuhopecten_yessoensis]	sp|P52735|VAV2_HUMAN	Guanine_nucleotide_exchange_factor_VAV2_OS=Homo_sapiens_OX=9606_GN=VAV2_PE=1_SV=2	myi:110466438	K05730_guanine_nucleotide_exchange_factor_VAV_|_(RefSeq)_guanine_nucleotide_exchange_factor_VAV2-like_isoform_X1_(A)	YES
HiC_scaffold_2	27381168	intron_variant	NA	27353695	27423559	evm.model.000045F_PILON.86	XP_021378644.1	guanine_nucleotide_exchange_factor_VAV2-like_isoform_X6__[Mizuhopecten_yessoensis]	sp|P52735|VAV2_HUMAN	Guanine_nucleotide_exchange_factor_VAV2_OS=Homo_sapiens_OX=9606_GN=VAV2_PE=1_SV=2	myi:110466438	K05730_guanine_nucleotide_exchange_factor_VAV_|_(RefSeq)_guanine_nucleotide_exchange_factor_VAV2-like_isoform_X1_(A)	YES
HiC_scaffold_2	27381161	intron_variant	NA	27353695	27423559	evm.model.000045F_PILON.86	XP_021378644.1	guanine_nucleotide_exchange_factor_VAV2-like_isoform_X6__[Mizuhopecten_yessoensis]	sp|P52735|VAV2_HUMAN	Guanine_nucleotide_exchange_factor_VAV2_OS=Homo_sapiens_OX=9606_GN=VAV2_PE=1_SV=2	myi:110466438	K05730_guanine_nucleotide_exchange_factor_VAV_|_(RefSeq)_guanine_nucleotide_exchange_factor_VAV2-like_isoform_X1_(A)	YES
HiC_scaffold_2	27381516	intron_variant	NA	27353695	27423559	evm.model.000045F_PILON.86	XP_021378644.1	guanine_nucleotide_exchange_factor_VAV2-like_isoform_X6__[Mizuhopecten_yessoensis]	sp|P52735|VAV2_HUMAN	Guanine_nucleotide_exchange_factor_VAV2_OS=Homo_sapiens_OX=9606_GN=VAV2_PE=1_SV=2	myi:110466438	K05730_guanine_nucleotide_exchange_factor_VAV_|_(RefSeq)_guanine_nucleotide_exchange_factor_VAV2-like_isoform_X1_(A)	YES
HiC_scaffold_2	27381517	intron_variant	NA	27353695	27423559	evm.model.000045F_PILON.86	XP_021378644.1	guanine_nucleotide_exchange_factor_VAV2-like_isoform_X6__[Mizuhopecten_yessoensis]	sp|P52735|VAV2_HUMAN	Guanine_nucleotide_exchange_factor_VAV2_OS=Homo_sapiens_OX=9606_GN=VAV2_PE=1_SV=2	myi:110466438	K05730_guanine_nucleotide_exchange_factor_VAV_|_(RefSeq)_guanine_nucleotide_exchange_factor_VAV2-like_isoform_X1_(A)	YES
HiC_scaffold_2	27381544	intron_variant	NA	27353695	27423559	evm.model.000045F_PILON.86	XP_021378644.1	guanine_nucleotide_exchange_factor_VAV2-like_isoform_X6__[Mizuhopecten_yessoensis]	sp|P52735|VAV2_HUMAN	Guanine_nucleotide_exchange_factor_VAV2_OS=Homo_sapiens_OX=9606_GN=VAV2_PE=1_SV=2	myi:110466438	K05730_guanine_nucleotide_exchange_factor_VAV_|_(RefSeq)_guanine_nucleotide_exchange_factor_VAV2-like_isoform_X1_(A)	YES
HiC_scaffold_2	27408138	intron_variant	NA	27353695	27423559	evm.model.000045F_PILON.86	XP_021378644.1	guanine_nucleotide_exchange_factor_VAV2-like_isoform_X6__[Mizuhopecten_yessoensis]	sp|P52735|VAV2_HUMAN	Guanine_nucleotide_exchange_factor_VAV2_OS=Homo_sapiens_OX=9606_GN=VAV2_PE=1_SV=2	myi:110466438	K05730_guanine_nucleotide_exchange_factor_VAV_|_(RefSeq)_guanine_nucleotide_exchange_factor_VAV2-like_isoform_X1_(A)	YES
HiC_scaffold_2	27424369	downstream_gene_variant	NA	27353695	27423559	evm.model.000045F_PILON.86	XP_021378644.1	guanine_nucleotide_exchange_factor_VAV2-like_isoform_X6__[Mizuhopecten_yessoensis]	sp|P52735|VAV2_HUMAN	Guanine_nucleotide_exchange_factor_VAV2_OS=Homo_sapiens_OX=9606_GN=VAV2_PE=1_SV=2	myi:110466438	K05730_guanine_nucleotide_exchange_factor_VAV_|_(RefSeq)_guanine_nucleotide_exchange_factor_VAV2-like_isoform_X1_(A)	NO
HiC_scaffold_2	27424319	downstream_gene_variant	NA	27353695	27423559	evm.model.000045F_PILON.86	XP_021378644.1	guanine_nucleotide_exchange_factor_VAV2-like_isoform_X6__[Mizuhopecten_yessoensis]	sp|P52735|VAV2_HUMAN	Guanine_nucleotide_exchange_factor_VAV2_OS=Homo_sapiens_OX=9606_GN=VAV2_PE=1_SV=2	myi:110466438	K05730_guanine_nucleotide_exchange_factor_VAV_|_(RefSeq)_guanine_nucleotide_exchange_factor_VAV2-like_isoform_X1_(A)	NO
HiC_scaffold_2	27444585	intron_variant	NA	27438007	27445666	evm.model.000045F_PILON.87	XP_021378552.1	ADAMTS-like_protein_2__[Mizuhopecten_yessoensis]	sp|Q9UKP4|ATS7_HUMAN	A_disintegrin_and_metalloproteinase_with_thrombospondin_motifs_7_OS=Homo_sapiens_OX=9606_GN=ADAMTS7_PE=1_SV=2	pdam:113677779	K08631_a_disintegrin_and_metalloproteinase_with_thrombospondin_motifs_17_[EC:3.4.24.-]_|_(RefSeq)_A_disintegrin_and_metalloproteinase_with_thrombospondin_motifs_19-like_(A)	YES
HiC_scaffold_2	27456444	synonymous_variant	LOW	27456052	27483278	evm.model.000045F_PILON.89	XP_021378590.1	5-hydroxytryptamine_receptor_1D-like__[Mizuhopecten_yessoensis]	sp|Q93127|GPR18_AMPAM	Probable_G-protein_coupled_receptor_No18_OS=Amphibalanus_amphitrite_OX=1232801_PE=3_SV=1	myi:110451394	K04233_allatostatin_A_receptor_|_(RefSeq)_uncharacterized_protein_LOC110451394_(A)	YES
HiC_scaffold_2	27456403	missense_variant	MODERATE	27456052	27483278	evm.model.000045F_PILON.89	XP_021378590.1	5-hydroxytryptamine_receptor_1D-like__[Mizuhopecten_yessoensis]	sp|Q93127|GPR18_AMPAM	Probable_G-protein_coupled_receptor_No18_OS=Amphibalanus_amphitrite_OX=1232801_PE=3_SV=1	myi:110451394	K04233_allatostatin_A_receptor_|_(RefSeq)_uncharacterized_protein_LOC110451394_(A)	YES
HiC_scaffold_2	27456396	synonymous_variant	LOW	27456052	27483278	evm.model.000045F_PILON.89	XP_021378590.1	5-hydroxytryptamine_receptor_1D-like__[Mizuhopecten_yessoensis]	sp|Q93127|GPR18_AMPAM	Probable_G-protein_coupled_receptor_No18_OS=Amphibalanus_amphitrite_OX=1232801_PE=3_SV=1	myi:110451394	K04233_allatostatin_A_receptor_|_(RefSeq)_uncharacterized_protein_LOC110451394_(A)	YES
HiC_scaffold_2	27469131	intron_variant	NA	27456052	27483278	evm.model.000045F_PILON.89	XP_021378590.1	5-hydroxytryptamine_receptor_1D-like__[Mizuhopecten_yessoensis]	sp|Q93127|GPR18_AMPAM	Probable_G-protein_coupled_receptor_No18_OS=Amphibalanus_amphitrite_OX=1232801_PE=3_SV=1	myi:110451394	K04233_allatostatin_A_receptor_|_(RefSeq)_uncharacterized_protein_LOC110451394_(A)	YES
HiC_scaffold_2	27469093	intron_variant	NA	27456052	27483278	evm.model.000045F_PILON.89	XP_021378590.1	5-hydroxytryptamine_receptor_1D-like__[Mizuhopecten_yessoensis]	sp|Q93127|GPR18_AMPAM	Probable_G-protein_coupled_receptor_No18_OS=Amphibalanus_amphitrite_OX=1232801_PE=3_SV=1	myi:110451394	K04233_allatostatin_A_receptor_|_(RefSeq)_uncharacterized_protein_LOC110451394_(A)	YES
HiC_scaffold_2	27469091	intron_variant	NA	27456052	27483278	evm.model.000045F_PILON.89	XP_021378590.1	5-hydroxytryptamine_receptor_1D-like__[Mizuhopecten_yessoensis]	sp|Q93127|GPR18_AMPAM	Probable_G-protein_coupled_receptor_No18_OS=Amphibalanus_amphitrite_OX=1232801_PE=3_SV=1	myi:110451394	K04233_allatostatin_A_receptor_|_(RefSeq)_uncharacterized_protein_LOC110451394_(A)	YES
HiC_scaffold_2	28044622	intron_variant	NA	28013652	28071568	evm.model.000045F_PILON.116	XP_021355025.1	abnormal_spindle-like_microcephaly-associated_protein_homolog__[Mizuhopecten_yessoensis]	sp|P62287|ASPM_COLGU	Abnormal_spindle-like_microcephaly-associated_protein_homolog_OS=Colobus_guereza_OX=33548_GN=ASPM_PE=3_SV=1	myi:110451379	K16743_abnormal_spindle-like_microcephaly-associated_protein_|_(RefSeq)_abnormal_spindle-like_microcephaly-associated_protein_homolog_(A)	YES
HiC_scaffold_2	28051249	intron_variant	NA	28013652	28071568	evm.model.000045F_PILON.116	XP_021355025.1	abnormal_spindle-like_microcephaly-associated_protein_homolog__[Mizuhopecten_yessoensis]	sp|P62287|ASPM_COLGU	Abnormal_spindle-like_microcephaly-associated_protein_homolog_OS=Colobus_guereza_OX=33548_GN=ASPM_PE=3_SV=1	myi:110451379	K16743_abnormal_spindle-like_microcephaly-associated_protein_|_(RefSeq)_abnormal_spindle-like_microcephaly-associated_protein_homolog_(A)	YES
HiC_scaffold_2	28051265	intron_variant	NA	28013652	28071568	evm.model.000045F_PILON.116	XP_021355025.1	abnormal_spindle-like_microcephaly-associated_protein_homolog__[Mizuhopecten_yessoensis]	sp|P62287|ASPM_COLGU	Abnormal_spindle-like_microcephaly-associated_protein_homolog_OS=Colobus_guereza_OX=33548_GN=ASPM_PE=3_SV=1	myi:110451379	K16743_abnormal_spindle-like_microcephaly-associated_protein_|_(RefSeq)_abnormal_spindle-like_microcephaly-associated_protein_homolog_(A)	YES
HiC_scaffold_2	28057614	intron_variant	NA	28013652	28071568	evm.model.000045F_PILON.116	XP_021355025.1	abnormal_spindle-like_microcephaly-associated_protein_homolog__[Mizuhopecten_yessoensis]	sp|P62287|ASPM_COLGU	Abnormal_spindle-like_microcephaly-associated_protein_homolog_OS=Colobus_guereza_OX=33548_GN=ASPM_PE=3_SV=1	myi:110451379	K16743_abnormal_spindle-like_microcephaly-associated_protein_|_(RefSeq)_abnormal_spindle-like_microcephaly-associated_protein_homolog_(A)	YES
HiC_scaffold_2	28057611	intron_variant	NA	28013652	28071568	evm.model.000045F_PILON.116	XP_021355025.1	abnormal_spindle-like_microcephaly-associated_protein_homolog__[Mizuhopecten_yessoensis]	sp|P62287|ASPM_COLGU	Abnormal_spindle-like_microcephaly-associated_protein_homolog_OS=Colobus_guereza_OX=33548_GN=ASPM_PE=3_SV=1	myi:110451379	K16743_abnormal_spindle-like_microcephaly-associated_protein_|_(RefSeq)_abnormal_spindle-like_microcephaly-associated_protein_homolog_(A)	YES
HiC_scaffold_2	28421754	intergenic_region	NA	28377259	28401074	evm.model.003307F_PILON.1.2	XP_021356700.1	retrograde_protein_of_51_kDa-like_isoform_X2__[Mizuhopecten_yessoensis]	sp|Q6QUW1|RGP51_LYMST	Retrograde_protein_of_51_kDa_OS=Lymnaea_stagnalis_OX=6523_GN=RGP51_PE=1_SV=1	myi:110452468	K07605_type_II_keratin,_basic_|_(RefSeq)_retrograde_protein_of_51_kDa-like_isoform_X1_(A)	NO
HiC_scaffold_2	28422130	intergenic_region	NA	28377259	28401074	evm.model.003307F_PILON.1.2	XP_021356700.1	retrograde_protein_of_51_kDa-like_isoform_X2__[Mizuhopecten_yessoensis]	sp|Q6QUW1|RGP51_LYMST	Retrograde_protein_of_51_kDa_OS=Lymnaea_stagnalis_OX=6523_GN=RGP51_PE=1_SV=1	myi:110452468	K07605_type_II_keratin,_basic_|_(RefSeq)_retrograde_protein_of_51_kDa-like_isoform_X1_(A)	NO
HiC_scaffold_2	28426116	intergenic_region	NA	28377259	28401074	evm.model.003307F_PILON.1.2	XP_021356700.1	retrograde_protein_of_51_kDa-like_isoform_X2__[Mizuhopecten_yessoensis]	sp|Q6QUW1|RGP51_LYMST	Retrograde_protein_of_51_kDa_OS=Lymnaea_stagnalis_OX=6523_GN=RGP51_PE=1_SV=1	myi:110452468	K07605_type_II_keratin,_basic_|_(RefSeq)_retrograde_protein_of_51_kDa-like_isoform_X1_(A)	NO
HiC_scaffold_2	28426114	intergenic_region	NA	28377259	28401074	evm.model.003307F_PILON.1.2	XP_021356700.1	retrograde_protein_of_51_kDa-like_isoform_X2__[Mizuhopecten_yessoensis]	sp|Q6QUW1|RGP51_LYMST	Retrograde_protein_of_51_kDa_OS=Lymnaea_stagnalis_OX=6523_GN=RGP51_PE=1_SV=1	myi:110452468	K07605_type_II_keratin,_basic_|_(RefSeq)_retrograde_protein_of_51_kDa-like_isoform_X1_(A)	NO
HiC_scaffold_2	28490017	downstream_gene_variant	NA	28480039	28482831	evm.model.002548F_PILON.3	NA	NA	NA	NA	NA	NA	NO
HiC_scaffold_2	28491848	missense_variant	MODERATE	28491823	28496841	evm.model.002548F_PILON.4	NA	NA	NA	NA	NA	NA	YES
HiC_scaffold_2	28512677	intron_variant	NA	28499455	28521345	evm.model.002548F_PILON.7	XP_021348572.1	uncharacterized_protein_LOC110447298_isoform_X11__[Mizuhopecten_yessoensis]	NA	NA	NA	NA	YES
HiC_scaffold_2	28512671	intron_variant	NA	28499455	28521345	evm.model.002548F_PILON.7	XP_021348572.1	uncharacterized_protein_LOC110447298_isoform_X11__[Mizuhopecten_yessoensis]	NA	NA	NA	NA	YES
HiC_scaffold_2	28520476	synonymous_variant	LOW	28499455	28521345	evm.model.002548F_PILON.7	XP_021348572.1	uncharacterized_protein_LOC110447298_isoform_X11__[Mizuhopecten_yessoensis]	NA	NA	NA	NA	YES
HiC_scaffold_2	28520422	synonymous_variant	LOW	28499455	28521345	evm.model.002548F_PILON.7	XP_021348572.1	uncharacterized_protein_LOC110447298_isoform_X11__[Mizuhopecten_yessoensis]	NA	NA	NA	NA	YES
HiC_scaffold_2	28562828	3_prime_UTR_variant	NA	28561255	28594859	evm.model.002548F_PILON.12	XP_022326791.1	70_kDa_neurofilament_protein-like_isoform_X2__[Crassostrea_virginica]	sp|Q01241|NF70_DORPE	70_kDa_neurofilament_protein_OS=Doryteuthis_pealeii_OX=1051067_PE=2_SV=1	myi:110447302	K04574_neurofilament_heavy_polypeptide_|_(RefSeq)_neurofilament_medium_polypeptide-like_(A)	YES
HiC_scaffold_2	28562774	3_prime_UTR_variant	NA	28561255	28594859	evm.model.002548F_PILON.12	XP_022326791.1	70_kDa_neurofilament_protein-like_isoform_X2__[Crassostrea_virginica]	sp|Q01241|NF70_DORPE	70_kDa_neurofilament_protein_OS=Doryteuthis_pealeii_OX=1051067_PE=2_SV=1	myi:110447302	K04574_neurofilament_heavy_polypeptide_|_(RefSeq)_neurofilament_medium_polypeptide-like_(A)	YES
HiC_scaffold_2	28579892	intron_variant	NA	28561255	28594859	evm.model.002548F_PILON.12	XP_022326791.1	70_kDa_neurofilament_protein-like_isoform_X2__[Crassostrea_virginica]	sp|Q01241|NF70_DORPE	70_kDa_neurofilament_protein_OS=Doryteuthis_pealeii_OX=1051067_PE=2_SV=1	myi:110447302	K04574_neurofilament_heavy_polypeptide_|_(RefSeq)_neurofilament_medium_polypeptide-like_(A)	YES
HiC_scaffold_2	28579907	intron_variant	NA	28561255	28594859	evm.model.002548F_PILON.12	XP_022326791.1	70_kDa_neurofilament_protein-like_isoform_X2__[Crassostrea_virginica]	sp|Q01241|NF70_DORPE	70_kDa_neurofilament_protein_OS=Doryteuthis_pealeii_OX=1051067_PE=2_SV=1	myi:110447302	K04574_neurofilament_heavy_polypeptide_|_(RefSeq)_neurofilament_medium_polypeptide-like_(A)	YES
HiC_scaffold_2	28585672	intron_variant	NA	28561255	28594859	evm.model.002548F_PILON.12	XP_022326791.1	70_kDa_neurofilament_protein-like_isoform_X2__[Crassostrea_virginica]	sp|Q01241|NF70_DORPE	70_kDa_neurofilament_protein_OS=Doryteuthis_pealeii_OX=1051067_PE=2_SV=1	myi:110447302	K04574_neurofilament_heavy_polypeptide_|_(RefSeq)_neurofilament_medium_polypeptide-like_(A)	YES
HiC_scaffold_2	28593097	intron_variant	NA	28561255	28594859	evm.model.002548F_PILON.12	XP_022326791.1	70_kDa_neurofilament_protein-like_isoform_X2__[Crassostrea_virginica]	sp|Q01241|NF70_DORPE	70_kDa_neurofilament_protein_OS=Doryteuthis_pealeii_OX=1051067_PE=2_SV=1	myi:110447302	K04574_neurofilament_heavy_polypeptide_|_(RefSeq)_neurofilament_medium_polypeptide-like_(A)	YES
HiC_scaffold_2	28593052	intron_variant	NA	28561255	28594859	evm.model.002548F_PILON.12	XP_022326791.1	70_kDa_neurofilament_protein-like_isoform_X2__[Crassostrea_virginica]	sp|Q01241|NF70_DORPE	70_kDa_neurofilament_protein_OS=Doryteuthis_pealeii_OX=1051067_PE=2_SV=1	myi:110447302	K04574_neurofilament_heavy_polypeptide_|_(RefSeq)_neurofilament_medium_polypeptide-like_(A)	YES
HiC_scaffold_2	28626537	intergenic_region	NA	28609393	28616624	evm.model.000393F_PILON.1	XP_021346783.1	uncharacterized_protein_LOC110446122__[Mizuhopecten_yessoensis]	sp|Q94481|CIGB_DICDI	FNIP_repeat-containing_protein_cigB_OS=Dictyostelium_discoideum_OX=44689_GN=cigB_PE=2_SV=3	blep:AL038_10105	K02487_type_IV_pili_sensor_histidine_kinase_and_response_regulator_K06596_chemosensory_pili_system_protein_ChpA_(sensor_histidine_kinase/response_regulator)_|_(GenBank)_hypothetical_protein_(A)	NO
HiC_scaffold_2	28637047	intergenic_region	NA	28609393	28616624	evm.model.000393F_PILON.1	XP_021346783.1	uncharacterized_protein_LOC110446122__[Mizuhopecten_yessoensis]	sp|Q94481|CIGB_DICDI	FNIP_repeat-containing_protein_cigB_OS=Dictyostelium_discoideum_OX=44689_GN=cigB_PE=2_SV=3	blep:AL038_10105	K02487_type_IV_pili_sensor_histidine_kinase_and_response_regulator_K06596_chemosensory_pili_system_protein_ChpA_(sensor_histidine_kinase/response_regulator)_|_(GenBank)_hypothetical_protein_(A)	NO
HiC_scaffold_2	28637006	intergenic_region	NA	28609393	28616624	evm.model.000393F_PILON.1	XP_021346783.1	uncharacterized_protein_LOC110446122__[Mizuhopecten_yessoensis]	sp|Q94481|CIGB_DICDI	FNIP_repeat-containing_protein_cigB_OS=Dictyostelium_discoideum_OX=44689_GN=cigB_PE=2_SV=3	blep:AL038_10105	K02487_type_IV_pili_sensor_histidine_kinase_and_response_regulator_K06596_chemosensory_pili_system_protein_ChpA_(sensor_histidine_kinase/response_regulator)_|_(GenBank)_hypothetical_protein_(A)	NO
HiC_scaffold_2	28644441	intergenic_region	NA	28609393	28616624	evm.model.000393F_PILON.1	XP_021346783.1	uncharacterized_protein_LOC110446122__[Mizuhopecten_yessoensis]	sp|Q94481|CIGB_DICDI	FNIP_repeat-containing_protein_cigB_OS=Dictyostelium_discoideum_OX=44689_GN=cigB_PE=2_SV=3	blep:AL038_10105	K02487_type_IV_pili_sensor_histidine_kinase_and_response_regulator_K06596_chemosensory_pili_system_protein_ChpA_(sensor_histidine_kinase/response_regulator)_|_(GenBank)_hypothetical_protein_(A)	NO
HiC_scaffold_2	28644448	intergenic_region	NA	28609393	28616624	evm.model.000393F_PILON.1	XP_021346783.1	uncharacterized_protein_LOC110446122__[Mizuhopecten_yessoensis]	sp|Q94481|CIGB_DICDI	FNIP_repeat-containing_protein_cigB_OS=Dictyostelium_discoideum_OX=44689_GN=cigB_PE=2_SV=3	blep:AL038_10105	K02487_type_IV_pili_sensor_histidine_kinase_and_response_regulator_K06596_chemosensory_pili_system_protein_ChpA_(sensor_histidine_kinase/response_regulator)_|_(GenBank)_hypothetical_protein_(A)	NO
HiC_scaffold_2	28644449	intergenic_region	NA	28609393	28616624	evm.model.000393F_PILON.1	XP_021346783.1	uncharacterized_protein_LOC110446122__[Mizuhopecten_yessoensis]	sp|Q94481|CIGB_DICDI	FNIP_repeat-containing_protein_cigB_OS=Dictyostelium_discoideum_OX=44689_GN=cigB_PE=2_SV=3	blep:AL038_10105	K02487_type_IV_pili_sensor_histidine_kinase_and_response_regulator_K06596_chemosensory_pili_system_protein_ChpA_(sensor_histidine_kinase/response_regulator)_|_(GenBank)_hypothetical_protein_(A)	NO
HiC_scaffold_2	28644455	intergenic_region	NA	28609393	28616624	evm.model.000393F_PILON.1	XP_021346783.1	uncharacterized_protein_LOC110446122__[Mizuhopecten_yessoensis]	sp|Q94481|CIGB_DICDI	FNIP_repeat-containing_protein_cigB_OS=Dictyostelium_discoideum_OX=44689_GN=cigB_PE=2_SV=3	blep:AL038_10105	K02487_type_IV_pili_sensor_histidine_kinase_and_response_regulator_K06596_chemosensory_pili_system_protein_ChpA_(sensor_histidine_kinase/response_regulator)_|_(GenBank)_hypothetical_protein_(A)	NO
HiC_scaffold_2	28675961	intergenic_region	NA	28609393	28616624	evm.model.000393F_PILON.1	XP_021346783.1	uncharacterized_protein_LOC110446122__[Mizuhopecten_yessoensis]	sp|Q94481|CIGB_DICDI	FNIP_repeat-containing_protein_cigB_OS=Dictyostelium_discoideum_OX=44689_GN=cigB_PE=2_SV=3	blep:AL038_10105	K02487_type_IV_pili_sensor_histidine_kinase_and_response_regulator_K06596_chemosensory_pili_system_protein_ChpA_(sensor_histidine_kinase/response_regulator)_|_(GenBank)_hypothetical_protein_(A)	NO
HiC_scaffold_2	28675973	intergenic_region	NA	28609393	28616624	evm.model.000393F_PILON.1	XP_021346783.1	uncharacterized_protein_LOC110446122__[Mizuhopecten_yessoensis]	sp|Q94481|CIGB_DICDI	FNIP_repeat-containing_protein_cigB_OS=Dictyostelium_discoideum_OX=44689_GN=cigB_PE=2_SV=3	blep:AL038_10105	K02487_type_IV_pili_sensor_histidine_kinase_and_response_regulator_K06596_chemosensory_pili_system_protein_ChpA_(sensor_histidine_kinase/response_regulator)_|_(GenBank)_hypothetical_protein_(A)	NO
HiC_scaffold_2	28697097	intron_variant	NA	28696256	28721582	evm.model.000393F_PILON.4	XP_021353973.1	uncharacterized_protein_LOC110450673__[Mizuhopecten_yessoensis]	sp|Q1EG27|MYO3B_MOUSE	Myosin-IIIb_OS=Mus_musculus_OX=10090_GN=Myo3b_PE=1_SV=2	myi:110450673	K00698_chitin_synthase_[EC:2.4.1.16]_|_(RefSeq)_uncharacterized_protein_LOC110450673_(A)	YES
HiC_scaffold_2	28697081	intron_variant	NA	28696256	28721582	evm.model.000393F_PILON.4	XP_021353973.1	uncharacterized_protein_LOC110450673__[Mizuhopecten_yessoensis]	sp|Q1EG27|MYO3B_MOUSE	Myosin-IIIb_OS=Mus_musculus_OX=10090_GN=Myo3b_PE=1_SV=2	myi:110450673	K00698_chitin_synthase_[EC:2.4.1.16]_|_(RefSeq)_uncharacterized_protein_LOC110450673_(A)	YES
HiC_scaffold_2	28697078	intron_variant	NA	28696256	28721582	evm.model.000393F_PILON.4	XP_021353973.1	uncharacterized_protein_LOC110450673__[Mizuhopecten_yessoensis]	sp|Q1EG27|MYO3B_MOUSE	Myosin-IIIb_OS=Mus_musculus_OX=10090_GN=Myo3b_PE=1_SV=2	myi:110450673	K00698_chitin_synthase_[EC:2.4.1.16]_|_(RefSeq)_uncharacterized_protein_LOC110450673_(A)	YES
HiC_scaffold_2	28698497	intron_variant	NA	28696256	28721582	evm.model.000393F_PILON.4	XP_021353973.1	uncharacterized_protein_LOC110450673__[Mizuhopecten_yessoensis]	sp|Q1EG27|MYO3B_MOUSE	Myosin-IIIb_OS=Mus_musculus_OX=10090_GN=Myo3b_PE=1_SV=2	myi:110450673	K00698_chitin_synthase_[EC:2.4.1.16]_|_(RefSeq)_uncharacterized_protein_LOC110450673_(A)	YES
HiC_scaffold_2	28718852	upstream_gene_variant	NA	28696256	28721582	evm.model.000393F_PILON.4	XP_021353973.1	uncharacterized_protein_LOC110450673__[Mizuhopecten_yessoensis]	sp|Q1EG27|MYO3B_MOUSE	Myosin-IIIb_OS=Mus_musculus_OX=10090_GN=Myo3b_PE=1_SV=2	myi:110450673	K00698_chitin_synthase_[EC:2.4.1.16]_|_(RefSeq)_uncharacterized_protein_LOC110450673_(A)	YES
HiC_scaffold_2	28718879	upstream_gene_variant	NA	28696256	28721582	evm.model.000393F_PILON.4	XP_021353973.1	uncharacterized_protein_LOC110450673__[Mizuhopecten_yessoensis]	sp|Q1EG27|MYO3B_MOUSE	Myosin-IIIb_OS=Mus_musculus_OX=10090_GN=Myo3b_PE=1_SV=2	myi:110450673	K00698_chitin_synthase_[EC:2.4.1.16]_|_(RefSeq)_uncharacterized_protein_LOC110450673_(A)	YES
HiC_scaffold_2	28732698	3_prime_UTR_variant	NA	28721596	28733340	evm.model.000393F_PILON.5	XP_021367707.1	uncharacterized_protein_LOC110459670_isoform_X3__[Mizuhopecten_yessoensis]	sp|G5EBQ8|CHS2_CAEEL	Chitin_synthase_chs-2_OS=Caenorhabditis_elegans_OX=6239_GN=chs-2_PE=1_SV=1	myi:110459670	K00698_chitin_synthase_[EC:2.4.1.16]_|_(RefSeq)_uncharacterized_protein_LOC110459670_isoform_X1_(A)	YES
HiC_scaffold_2	28763073	upstream_gene_variant	NA	28744109	28762688	evm.model.000393F_PILON.6	XP_021367708.1	uncharacterized_protein_LOC110459671__[Mizuhopecten_yessoensis]	sp|G5EBQ8|CHS2_CAEEL	Chitin_synthase_chs-2_OS=Caenorhabditis_elegans_OX=6239_GN=chs-2_PE=1_SV=1	myi:110459671	K00698_chitin_synthase_[EC:2.4.1.16]_|_(RefSeq)_uncharacterized_protein_LOC110459671_(A)	NO
HiC_scaffold_2	28763070	upstream_gene_variant	NA	28744109	28762688	evm.model.000393F_PILON.6	XP_021367708.1	uncharacterized_protein_LOC110459671__[Mizuhopecten_yessoensis]	sp|G5EBQ8|CHS2_CAEEL	Chitin_synthase_chs-2_OS=Caenorhabditis_elegans_OX=6239_GN=chs-2_PE=1_SV=1	myi:110459671	K00698_chitin_synthase_[EC:2.4.1.16]_|_(RefSeq)_uncharacterized_protein_LOC110459671_(A)	NO
HiC_scaffold_2	28763052	upstream_gene_variant	NA	28744109	28762688	evm.model.000393F_PILON.6	XP_021367708.1	uncharacterized_protein_LOC110459671__[Mizuhopecten_yessoensis]	sp|G5EBQ8|CHS2_CAEEL	Chitin_synthase_chs-2_OS=Caenorhabditis_elegans_OX=6239_GN=chs-2_PE=1_SV=1	myi:110459671	K00698_chitin_synthase_[EC:2.4.1.16]_|_(RefSeq)_uncharacterized_protein_LOC110459671_(A)	NO
HiC_scaffold_2	28869219	intergenic_region	NA	28845607	28846008	evm.model.000393F_PILON.9	XP_009065909.1	hypothetical_protein_LOTGIDRAFT_176238,_partial__[Lottia_gigantea]	NA	NA	sko:102809689	K04575_amyotrophic_lateral_sclerosis_2_protein_|_(RefSeq)_alsin-like_(A)	NO
HiC_scaffold_2	28869203	intergenic_region	NA	28845607	28846008	evm.model.000393F_PILON.9	XP_009065909.1	hypothetical_protein_LOTGIDRAFT_176238,_partial__[Lottia_gigantea]	NA	NA	sko:102809689	K04575_amyotrophic_lateral_sclerosis_2_protein_|_(RefSeq)_alsin-like_(A)	NO
HiC_scaffold_2	28877816	intergenic_region	NA	28845607	28846008	evm.model.000393F_PILON.9	XP_009065909.1	hypothetical_protein_LOTGIDRAFT_176238,_partial__[Lottia_gigantea]	NA	NA	sko:102809689	K04575_amyotrophic_lateral_sclerosis_2_protein_|_(RefSeq)_alsin-like_(A)	NO
HiC_scaffold_2	28877806	intergenic_region	NA	28845607	28846008	evm.model.000393F_PILON.9	XP_009065909.1	hypothetical_protein_LOTGIDRAFT_176238,_partial__[Lottia_gigantea]	NA	NA	sko:102809689	K04575_amyotrophic_lateral_sclerosis_2_protein_|_(RefSeq)_alsin-like_(A)	NO
HiC_scaffold_2	28877792	intergenic_region	NA	28845607	28846008	evm.model.000393F_PILON.9	XP_009065909.1	hypothetical_protein_LOTGIDRAFT_176238,_partial__[Lottia_gigantea]	NA	NA	sko:102809689	K04575_amyotrophic_lateral_sclerosis_2_protein_|_(RefSeq)_alsin-like_(A)	NO
HiC_scaffold_2	28896218	intergenic_region	NA	28845607	28846008	evm.model.000393F_PILON.9	XP_009065909.1	hypothetical_protein_LOTGIDRAFT_176238,_partial__[Lottia_gigantea]	NA	NA	sko:102809689	K04575_amyotrophic_lateral_sclerosis_2_protein_|_(RefSeq)_alsin-like_(A)	NO
HiC_scaffold_2	28896161	intergenic_region	NA	28845607	28846008	evm.model.000393F_PILON.9	XP_009065909.1	hypothetical_protein_LOTGIDRAFT_176238,_partial__[Lottia_gigantea]	NA	NA	sko:102809689	K04575_amyotrophic_lateral_sclerosis_2_protein_|_(RefSeq)_alsin-like_(A)	NO
HiC_scaffold_2	29036774	downstream_gene_variant	NA	29032917	29037911	evm.model.000393F_PILON.15	NA	NA	NA	NA	NA	NA	YES
HiC_scaffold_2	29046680	intron_variant	NA	29037494	29049383	evm.model.000393F_PILON.16	XP_021354615.1	uncharacterized_protein_LOC110451084__[Mizuhopecten_yessoensis]	NA	NA	NA	NA	YES
HiC_scaffold_2	29054597	3_prime_UTR_variant	NA	29053729	29061099	evm.model.000393F_PILON.17	XP_021354614.1	myosin-2_essential_light_chain-like__[Mizuhopecten_yessoensis]	sp|P54357|MLC2_DROME	Myosin-2_essential_light_chain_OS=Drosophila_melanogaster_OX=7227_GN=Mlc-c_PE=1_SV=1	myi:110451083	K12751_myosin_light_chain_6_|_(RefSeq)_myosin-2_essential_light_chain-like_(A)	YES
HiC_scaffold_2	29094131	intron_variant	NA	29084921	29105369	evm.model.000393F_PILON.21	XP_021365468.1	TBC1_domain_family_member_13-like__[Mizuhopecten_yessoensis]	sp|Q9NVG8|TBC13_HUMAN	TBC1_domain_family_member_13_OS=Homo_sapiens_OX=9606_GN=TBC1D13_PE=1_SV=3	nve:NEMVE_v1g165490	K18469_TBC1_domain_family_member_5_|_(RefSeq)_hypothetical_protein_(A)	YES
HiC_scaffold_2	29094169	intron_variant	NA	29084921	29105369	evm.model.000393F_PILON.21	XP_021365468.1	TBC1_domain_family_member_13-like__[Mizuhopecten_yessoensis]	sp|Q9NVG8|TBC13_HUMAN	TBC1_domain_family_member_13_OS=Homo_sapiens_OX=9606_GN=TBC1D13_PE=1_SV=3	nve:NEMVE_v1g165490	K18469_TBC1_domain_family_member_5_|_(RefSeq)_hypothetical_protein_(A)	YES
HiC_scaffold_2	29094177	intron_variant	NA	29084921	29105369	evm.model.000393F_PILON.21	XP_021365468.1	TBC1_domain_family_member_13-like__[Mizuhopecten_yessoensis]	sp|Q9NVG8|TBC13_HUMAN	TBC1_domain_family_member_13_OS=Homo_sapiens_OX=9606_GN=TBC1D13_PE=1_SV=3	nve:NEMVE_v1g165490	K18469_TBC1_domain_family_member_5_|_(RefSeq)_hypothetical_protein_(A)	YES
HiC_scaffold_2	29139637	intergenic_region	NA	29106680	29121689	evm.model.000393F_PILON.22	XP_021365483.1	uncharacterized_protein_LOC110458205__[Mizuhopecten_yessoensis]	NA	NA	NA	NA	NO
HiC_scaffold_2	29139657	intergenic_region	NA	29106680	29121689	evm.model.000393F_PILON.22	XP_021365483.1	uncharacterized_protein_LOC110458205__[Mizuhopecten_yessoensis]	NA	NA	NA	NA	NO
HiC_scaffold_2	29146708	intergenic_region	NA	29106680	29121689	evm.model.000393F_PILON.22	XP_021365483.1	uncharacterized_protein_LOC110458205__[Mizuhopecten_yessoensis]	NA	NA	NA	NA	NO
HiC_scaffold_2	29179593	intergenic_region	NA	29167087	29168367	evm.model.000393F_PILON.24	EKC31318.1	hypothetical_protein_CGI_10009958__[Crassostrea_gigas]	NA	NA	NA	NA	NO
HiC_scaffold_2	29179582	intergenic_region	NA	29167087	29168367	evm.model.000393F_PILON.24	EKC31318.1	hypothetical_protein_CGI_10009958__[Crassostrea_gigas]	NA	NA	NA	NA	NO
HiC_scaffold_2	29184589	downstream_gene_variant	NA	29167087	29168367	evm.model.000393F_PILON.24	EKC31318.1	hypothetical_protein_CGI_10009958__[Crassostrea_gigas]	NA	NA	NA	NA	NO
HiC_scaffold_2	29184588	downstream_gene_variant	NA	29167087	29168367	evm.model.000393F_PILON.24	EKC31318.1	hypothetical_protein_CGI_10009958__[Crassostrea_gigas]	NA	NA	NA	NA	NO
HiC_scaffold_2	29191015	intron_variant	NA	29188563	29194188	evm.model.000393F_PILON.26	XP_021365506.1	uncharacterized_protein_LOC110458218__[Mizuhopecten_yessoensis]	sp|Q9H1U4|MEGF9_HUMAN	Multiple_epidermal_growth_factor-like_domains_protein_9_OS=Homo_sapiens_OX=9606_GN=MEGF9_PE=2_SV=3	bfo:BRAFLDRAFT_88482	K06240_laminin,_alpha_3/5_|_(RefSeq)_hypothetical_protein_(A)	YES
HiC_scaffold_2	29309565	intron_variant	NA	29303505	29316179	evm.model.000393F_PILON.38	XP_021369556.1	suppressor_APC_domain-containing_protein_2-like__[Mizuhopecten_yessoensis]	sp|Q86UD0|SAPC2_HUMAN	Suppressor_APC_domain-containing_protein_2_OS=Homo_sapiens_OX=9606_GN=SAPCD2_PE=1_SV=2	NA	NA	YES
HiC_scaffold_2	29322597	intron_variant	NA	29316730	29338656	evm.model.000393F_PILON.39	XP_021369640.1	aspartate,_glycine,_lysine_and_serine-rich_protein-like_isoform_X1__[Mizuhopecten_yessoensis]	sp|Q9ULV3|CIZ1_HUMAN	Cip1-interacting_zinc_finger_protein_OS=Homo_sapiens_OX=9606_GN=CIZ1_PE=1_SV=2	gja:107110271	K13213_matrin_3_|_(RefSeq)_MATR3;_matrin_3_(A)	YES
HiC_scaffold_2	29349028	upstream_gene_variant	NA	29316730	29338656	evm.model.000393F_PILON.39	XP_021369640.1	aspartate,_glycine,_lysine_and_serine-rich_protein-like_isoform_X1__[Mizuhopecten_yessoensis]	sp|Q9ULV3|CIZ1_HUMAN	Cip1-interacting_zinc_finger_protein_OS=Homo_sapiens_OX=9606_GN=CIZ1_PE=1_SV=2	gja:107110271	K13213_matrin_3_|_(RefSeq)_MATR3;_matrin_3_(A)	NO
HiC_scaffold_2	29352484	upstream_gene_variant	NA	29349486	29351553	evm.model.000393F_PILON.40	XP_021369609.1	probable_palmitoyltransferase_ZDHHC24__[Mizuhopecten_yessoensis]	sp|Q2TGI5|ZDH24_RAT	Probable_palmitoyltransferase_ZDHHC24_OS=Rattus_norvegicus_OX=10116_GN=Zdhhc24_PE=2_SV=1	myi:110460786	K18932_palmitoyltransferase_[EC:2.3.1.225]_|_(RefSeq)_probable_palmitoyltransferase_ZDHHC24_(A)	NO
HiC_scaffold_2	29352487	upstream_gene_variant	NA	29349486	29351553	evm.model.000393F_PILON.40	XP_021369609.1	probable_palmitoyltransferase_ZDHHC24__[Mizuhopecten_yessoensis]	sp|Q2TGI5|ZDH24_RAT	Probable_palmitoyltransferase_ZDHHC24_OS=Rattus_norvegicus_OX=10116_GN=Zdhhc24_PE=2_SV=1	myi:110460786	K18932_palmitoyltransferase_[EC:2.3.1.225]_|_(RefSeq)_probable_palmitoyltransferase_ZDHHC24_(A)	NO
HiC_scaffold_2	29368411	intron_variant	NA	29352501	29398342	evm.model.000393F_PILON.42	XP_021369648.1	valine--tRNA_ligase-like__[Mizuhopecten_yessoensis]	sp|P49696|SYVC_TAKRU	Valine--tRNA_ligase_OS=Takifugu_rubripes_OX=31033_GN=vars_PE=3_SV=1	myi:110460814	K01873_valyl-tRNA_synthetase_[EC:6.1.1.9]_|_(RefSeq)_valine--tRNA_ligase-like_(A)	YES
HiC_scaffold_2	29383518	intron_variant	NA	29352501	29398342	evm.model.000393F_PILON.42	XP_021369648.1	valine--tRNA_ligase-like__[Mizuhopecten_yessoensis]	sp|P49696|SYVC_TAKRU	Valine--tRNA_ligase_OS=Takifugu_rubripes_OX=31033_GN=vars_PE=3_SV=1	myi:110460814	K01873_valyl-tRNA_synthetase_[EC:6.1.1.9]_|_(RefSeq)_valine--tRNA_ligase-like_(A)	YES
HiC_scaffold_2	29383510	intron_variant	NA	29352501	29398342	evm.model.000393F_PILON.42	XP_021369648.1	valine--tRNA_ligase-like__[Mizuhopecten_yessoensis]	sp|P49696|SYVC_TAKRU	Valine--tRNA_ligase_OS=Takifugu_rubripes_OX=31033_GN=vars_PE=3_SV=1	myi:110460814	K01873_valyl-tRNA_synthetase_[EC:6.1.1.9]_|_(RefSeq)_valine--tRNA_ligase-like_(A)	YES
HiC_scaffold_2	29389873	intron_variant	NA	29352501	29398342	evm.model.000393F_PILON.42	XP_021369648.1	valine--tRNA_ligase-like__[Mizuhopecten_yessoensis]	sp|P49696|SYVC_TAKRU	Valine--tRNA_ligase_OS=Takifugu_rubripes_OX=31033_GN=vars_PE=3_SV=1	myi:110460814	K01873_valyl-tRNA_synthetase_[EC:6.1.1.9]_|_(RefSeq)_valine--tRNA_ligase-like_(A)	YES
HiC_scaffold_2	29389885	intron_variant	NA	29352501	29398342	evm.model.000393F_PILON.42	XP_021369648.1	valine--tRNA_ligase-like__[Mizuhopecten_yessoensis]	sp|P49696|SYVC_TAKRU	Valine--tRNA_ligase_OS=Takifugu_rubripes_OX=31033_GN=vars_PE=3_SV=1	myi:110460814	K01873_valyl-tRNA_synthetase_[EC:6.1.1.9]_|_(RefSeq)_valine--tRNA_ligase-like_(A)	YES
HiC_scaffold_2	29389840	intron_variant	NA	29352501	29398342	evm.model.000393F_PILON.42	XP_021369648.1	valine--tRNA_ligase-like__[Mizuhopecten_yessoensis]	sp|P49696|SYVC_TAKRU	Valine--tRNA_ligase_OS=Takifugu_rubripes_OX=31033_GN=vars_PE=3_SV=1	myi:110460814	K01873_valyl-tRNA_synthetase_[EC:6.1.1.9]_|_(RefSeq)_valine--tRNA_ligase-like_(A)	YES
HiC_scaffold_2	29396786	3_prime_UTR_variant	NA	29352501	29398342	evm.model.000393F_PILON.42	XP_021369648.1	valine--tRNA_ligase-like__[Mizuhopecten_yessoensis]	sp|P49696|SYVC_TAKRU	Valine--tRNA_ligase_OS=Takifugu_rubripes_OX=31033_GN=vars_PE=3_SV=1	myi:110460814	K01873_valyl-tRNA_synthetase_[EC:6.1.1.9]_|_(RefSeq)_valine--tRNA_ligase-like_(A)	YES
HiC_scaffold_2	29396801	3_prime_UTR_variant	NA	29352501	29398342	evm.model.000393F_PILON.42	XP_021369648.1	valine--tRNA_ligase-like__[Mizuhopecten_yessoensis]	sp|P49696|SYVC_TAKRU	Valine--tRNA_ligase_OS=Takifugu_rubripes_OX=31033_GN=vars_PE=3_SV=1	myi:110460814	K01873_valyl-tRNA_synthetase_[EC:6.1.1.9]_|_(RefSeq)_valine--tRNA_ligase-like_(A)	YES
HiC_scaffold_2	29514242	intron_variant	NA	29418956	29522549	evm.model.000393F_PILON.45	XP_021369629.1	ATP-binding_cassette_sub-family_A_member_2-like_isoform_X1__[Mizuhopecten_yessoensis]	sp|Q9ESR9|ABCA2_RAT	ATP-binding_cassette_sub-family_A_member_2_OS=Rattus_norvegicus_OX=10116_GN=Abca2_PE=1_SV=1	myi:110460799	K05642_ATP-binding_cassette,_subfamily_A_(ABC1),_member_2_|_(RefSeq)_ATP-binding_cassette_sub-family_A_member_2-like_isoform_X1_(A)	YES
HiC_scaffold_2	29514234	intron_variant	NA	29418956	29522549	evm.model.000393F_PILON.45	XP_021369629.1	ATP-binding_cassette_sub-family_A_member_2-like_isoform_X1__[Mizuhopecten_yessoensis]	sp|Q9ESR9|ABCA2_RAT	ATP-binding_cassette_sub-family_A_member_2_OS=Rattus_norvegicus_OX=10116_GN=Abca2_PE=1_SV=1	myi:110460799	K05642_ATP-binding_cassette,_subfamily_A_(ABC1),_member_2_|_(RefSeq)_ATP-binding_cassette_sub-family_A_member_2-like_isoform_X1_(A)	YES
HiC_scaffold_2	29514229	intron_variant	NA	29418956	29522549	evm.model.000393F_PILON.45	XP_021369629.1	ATP-binding_cassette_sub-family_A_member_2-like_isoform_X1__[Mizuhopecten_yessoensis]	sp|Q9ESR9|ABCA2_RAT	ATP-binding_cassette_sub-family_A_member_2_OS=Rattus_norvegicus_OX=10116_GN=Abca2_PE=1_SV=1	myi:110460799	K05642_ATP-binding_cassette,_subfamily_A_(ABC1),_member_2_|_(RefSeq)_ATP-binding_cassette_sub-family_A_member_2-like_isoform_X1_(A)	YES
HiC_scaffold_2	29566139	intron_variant	NA	29548762	29567234	evm.model.000393F_PILON.48	XP_021369621.1	serine/threonine_kinase-like_domain-containing_protein_STKLD1_isoform_X3__[Mizuhopecten_yessoensis]	sp|Q80YS9|STKL1_MOUSE	Serine/threonine_kinase-like_domain-containing_protein_STKLD1_OS=Mus_musculus_OX=10090_GN=Stkld1_PE=2_SV=3	myi:110460792	K17546_serine/threonine_kinase-like_domain-containing_protein_STKLD1_|_(RefSeq)_serine/threonine_kinase-like_domain-containing_protein_STKLD1_isoform_X1_(A)	YES
HiC_scaffold_2	29566143	splice_region_variant&intron_variant	LOW	29548762	29567234	evm.model.000393F_PILON.48	XP_021369621.1	serine/threonine_kinase-like_domain-containing_protein_STKLD1_isoform_X3__[Mizuhopecten_yessoensis]	sp|Q80YS9|STKL1_MOUSE	Serine/threonine_kinase-like_domain-containing_protein_STKLD1_OS=Mus_musculus_OX=10090_GN=Stkld1_PE=2_SV=3	myi:110460792	K17546_serine/threonine_kinase-like_domain-containing_protein_STKLD1_|_(RefSeq)_serine/threonine_kinase-like_domain-containing_protein_STKLD1_isoform_X1_(A)	YES
HiC_scaffold_2	29566090	intron_variant	NA	29548762	29567234	evm.model.000393F_PILON.48	XP_021369621.1	serine/threonine_kinase-like_domain-containing_protein_STKLD1_isoform_X3__[Mizuhopecten_yessoensis]	sp|Q80YS9|STKL1_MOUSE	Serine/threonine_kinase-like_domain-containing_protein_STKLD1_OS=Mus_musculus_OX=10090_GN=Stkld1_PE=2_SV=3	myi:110460792	K17546_serine/threonine_kinase-like_domain-containing_protein_STKLD1_|_(RefSeq)_serine/threonine_kinase-like_domain-containing_protein_STKLD1_isoform_X1_(A)	YES
HiC_scaffold_2	29566081	intron_variant	NA	29548762	29567234	evm.model.000393F_PILON.48	XP_021369621.1	serine/threonine_kinase-like_domain-containing_protein_STKLD1_isoform_X3__[Mizuhopecten_yessoensis]	sp|Q80YS9|STKL1_MOUSE	Serine/threonine_kinase-like_domain-containing_protein_STKLD1_OS=Mus_musculus_OX=10090_GN=Stkld1_PE=2_SV=3	myi:110460792	K17546_serine/threonine_kinase-like_domain-containing_protein_STKLD1_|_(RefSeq)_serine/threonine_kinase-like_domain-containing_protein_STKLD1_isoform_X1_(A)	YES
HiC_scaffold_2	29579088	intron_variant	NA	29576640	29589468	evm.model.000393F_PILON.49	XP_021376136.1	alpha-tubulin_N-acetyltransferase_1-like_isoform_X1__[Mizuhopecten_yessoensis]	sp|B3RNE8|ATAT_TRIAD	Alpha-tubulin_N-acetyltransferase_OS=Trichoplax_adhaerens_OX=10228_GN=TRIADDRAFT_53139_PE=3_SV=1	myi:110464956	K19573_alpha-tubulin_N-acetyltransferase_1_[EC:2.3.1.108]_|_(RefSeq)_alpha-tubulin_N-acetyltransferase_1-like_isoform_X1_(A)	YES
HiC_scaffold_2	29588419	intron_variant	NA	29576640	29589468	evm.model.000393F_PILON.49	XP_021376136.1	alpha-tubulin_N-acetyltransferase_1-like_isoform_X1__[Mizuhopecten_yessoensis]	sp|B3RNE8|ATAT_TRIAD	Alpha-tubulin_N-acetyltransferase_OS=Trichoplax_adhaerens_OX=10228_GN=TRIADDRAFT_53139_PE=3_SV=1	myi:110464956	K19573_alpha-tubulin_N-acetyltransferase_1_[EC:2.3.1.108]_|_(RefSeq)_alpha-tubulin_N-acetyltransferase_1-like_isoform_X1_(A)	YES
HiC_scaffold_2	29588409	intron_variant	NA	29576640	29589468	evm.model.000393F_PILON.49	XP_021376136.1	alpha-tubulin_N-acetyltransferase_1-like_isoform_X1__[Mizuhopecten_yessoensis]	sp|B3RNE8|ATAT_TRIAD	Alpha-tubulin_N-acetyltransferase_OS=Trichoplax_adhaerens_OX=10228_GN=TRIADDRAFT_53139_PE=3_SV=1	myi:110464956	K19573_alpha-tubulin_N-acetyltransferase_1_[EC:2.3.1.108]_|_(RefSeq)_alpha-tubulin_N-acetyltransferase_1-like_isoform_X1_(A)	YES
HiC_scaffold_2	29588393	intron_variant	NA	29576640	29589468	evm.model.000393F_PILON.49	XP_021376136.1	alpha-tubulin_N-acetyltransferase_1-like_isoform_X1__[Mizuhopecten_yessoensis]	sp|B3RNE8|ATAT_TRIAD	Alpha-tubulin_N-acetyltransferase_OS=Trichoplax_adhaerens_OX=10228_GN=TRIADDRAFT_53139_PE=3_SV=1	myi:110464956	K19573_alpha-tubulin_N-acetyltransferase_1_[EC:2.3.1.108]_|_(RefSeq)_alpha-tubulin_N-acetyltransferase_1-like_isoform_X1_(A)	YES
HiC_scaffold_2	29594964	intron_variant	NA	29593889	29597754	evm.model.000393F_PILON.50	KYO44285.1	60S_ribosomal_protein_L23_isoform_B__[Alligator_mississippiensis]	sp|P48159|RL23_DROME	60S_ribosomal_protein_L23_OS=Drosophila_melanogaster_OX=7227_GN=RpL23_PE=1_SV=2	myi:110463033	K02894_large_subunit_ribosomal_protein_L23e_|_(RefSeq)_60S_ribosomal_protein_L23_(A)	YES
HiC_scaffold_2	29594931	intron_variant	NA	29593889	29597754	evm.model.000393F_PILON.50	KYO44285.1	60S_ribosomal_protein_L23_isoform_B__[Alligator_mississippiensis]	sp|P48159|RL23_DROME	60S_ribosomal_protein_L23_OS=Drosophila_melanogaster_OX=7227_GN=RpL23_PE=1_SV=2	myi:110463033	K02894_large_subunit_ribosomal_protein_L23e_|_(RefSeq)_60S_ribosomal_protein_L23_(A)	YES
HiC_scaffold_2	30504021	intergenic_region	NA	30494523	30496702	evm.model.000401F_PILON.34	XP_021377093.1	uncharacterized_protein_LOC110465526_isoform_X1__[Mizuhopecten_yessoensis]	NA	NA	NA	NA	NO
HiC_scaffold_2	30535190	intergenic_region	NA	30494523	30496702	evm.model.000401F_PILON.34	XP_021377093.1	uncharacterized_protein_LOC110465526_isoform_X1__[Mizuhopecten_yessoensis]	NA	NA	NA	NA	NO
HiC_scaffold_2	30535147	intergenic_region	NA	30494523	30496702	evm.model.000401F_PILON.34	XP_021377093.1	uncharacterized_protein_LOC110465526_isoform_X1__[Mizuhopecten_yessoensis]	NA	NA	NA	NA	NO
HiC_scaffold_2	30535125	intergenic_region	NA	30494523	30496702	evm.model.000401F_PILON.34	XP_021377093.1	uncharacterized_protein_LOC110465526_isoform_X1__[Mizuhopecten_yessoensis]	NA	NA	NA	NA	NO
HiC_scaffold_2	30539187	intergenic_region	NA	30494523	30496702	evm.model.000401F_PILON.34	XP_021377093.1	uncharacterized_protein_LOC110465526_isoform_X1__[Mizuhopecten_yessoensis]	NA	NA	NA	NA	NO
HiC_scaffold_2	30558836	intergenic_region	NA	30494523	30496702	evm.model.000401F_PILON.34	XP_021377093.1	uncharacterized_protein_LOC110465526_isoform_X1__[Mizuhopecten_yessoensis]	NA	NA	NA	NA	NO
HiC_scaffold_2	31204507	synonymous_variant	LOW	31186560	31211285	evm.model.001408F_PILON.13	XP_021349740.1	carboxyl-terminal_PDZ_ligand_of_neuronal_nitric_oxide_synthase_protein-like_isoform_X1__[Mizuhopecten_yessoensis]	sp|Q8SXX4|CAPON_DROME	Capon-like_protein_OS=Drosophila_melanogaster_OX=7227_GN=CG42673_PE=2_SV=1	myi:110448032	K16513_carboxyl-terminal_PDZ_ligand_of_neuronal_nitric_oxide_synthase_protein_|_(RefSeq)_carboxyl-terminal_PDZ_ligand_of_neuronal_nitric_oxide_synthase_protein-like_isoform_X1_(A)	YES
HiC_scaffold_2	31204510	synonymous_variant	LOW	31186560	31211285	evm.model.001408F_PILON.13	XP_021349740.1	carboxyl-terminal_PDZ_ligand_of_neuronal_nitric_oxide_synthase_protein-like_isoform_X1__[Mizuhopecten_yessoensis]	sp|Q8SXX4|CAPON_DROME	Capon-like_protein_OS=Drosophila_melanogaster_OX=7227_GN=CG42673_PE=2_SV=1	myi:110448032	K16513_carboxyl-terminal_PDZ_ligand_of_neuronal_nitric_oxide_synthase_protein_|_(RefSeq)_carboxyl-terminal_PDZ_ligand_of_neuronal_nitric_oxide_synthase_protein-like_isoform_X1_(A)	YES
HiC_scaffold_2	31204525	synonymous_variant	LOW	31186560	31211285	evm.model.001408F_PILON.13	XP_021349740.1	carboxyl-terminal_PDZ_ligand_of_neuronal_nitric_oxide_synthase_protein-like_isoform_X1__[Mizuhopecten_yessoensis]	sp|Q8SXX4|CAPON_DROME	Capon-like_protein_OS=Drosophila_melanogaster_OX=7227_GN=CG42673_PE=2_SV=1	myi:110448032	K16513_carboxyl-terminal_PDZ_ligand_of_neuronal_nitric_oxide_synthase_protein_|_(RefSeq)_carboxyl-terminal_PDZ_ligand_of_neuronal_nitric_oxide_synthase_protein-like_isoform_X1_(A)	YES
HiC_scaffold_2	31204468	synonymous_variant	LOW	31186560	31211285	evm.model.001408F_PILON.13	XP_021349740.1	carboxyl-terminal_PDZ_ligand_of_neuronal_nitric_oxide_synthase_protein-like_isoform_X1__[Mizuhopecten_yessoensis]	sp|Q8SXX4|CAPON_DROME	Capon-like_protein_OS=Drosophila_melanogaster_OX=7227_GN=CG42673_PE=2_SV=1	myi:110448032	K16513_carboxyl-terminal_PDZ_ligand_of_neuronal_nitric_oxide_synthase_protein_|_(RefSeq)_carboxyl-terminal_PDZ_ligand_of_neuronal_nitric_oxide_synthase_protein-like_isoform_X1_(A)	YES
HiC_scaffold_2	31250085	splice_region_variant&intron_variant	LOW	31220907	31259884	evm.model.001408F_PILON.15	XP_021358169.1	signal_transducer_and_activator_of_transcription_5A-like_isoform_X1__[Mizuhopecten_yessoensis]	sp|Q9TUZ1|STA5A_PIG	Signal_transducer_and_activator_of_transcription_5A_OS=Sus_scrofa_OX=9823_GN=STAT5A_PE=2_SV=1	myi:110453520	K11224_signal_transducer_and_activator_of_transcription_5B_|_(RefSeq)_signal_transducer_and_activator_of_transcription_5A-like_isoform_X1_(A)	YES
HiC_scaffold_2	31250082	intron_variant	NA	31220907	31259884	evm.model.001408F_PILON.15	XP_021358169.1	signal_transducer_and_activator_of_transcription_5A-like_isoform_X1__[Mizuhopecten_yessoensis]	sp|Q9TUZ1|STA5A_PIG	Signal_transducer_and_activator_of_transcription_5A_OS=Sus_scrofa_OX=9823_GN=STAT5A_PE=2_SV=1	myi:110453520	K11224_signal_transducer_and_activator_of_transcription_5B_|_(RefSeq)_signal_transducer_and_activator_of_transcription_5A-like_isoform_X1_(A)	YES
HiC_scaffold_2	31250874	intron_variant	NA	31220907	31259884	evm.model.001408F_PILON.15	XP_021358169.1	signal_transducer_and_activator_of_transcription_5A-like_isoform_X1__[Mizuhopecten_yessoensis]	sp|Q9TUZ1|STA5A_PIG	Signal_transducer_and_activator_of_transcription_5A_OS=Sus_scrofa_OX=9823_GN=STAT5A_PE=2_SV=1	myi:110453520	K11224_signal_transducer_and_activator_of_transcription_5B_|_(RefSeq)_signal_transducer_and_activator_of_transcription_5A-like_isoform_X1_(A)	YES
HiC_scaffold_2	31256123	intron_variant	NA	31220907	31259884	evm.model.001408F_PILON.15	XP_021358169.1	signal_transducer_and_activator_of_transcription_5A-like_isoform_X1__[Mizuhopecten_yessoensis]	sp|Q9TUZ1|STA5A_PIG	Signal_transducer_and_activator_of_transcription_5A_OS=Sus_scrofa_OX=9823_GN=STAT5A_PE=2_SV=1	myi:110453520	K11224_signal_transducer_and_activator_of_transcription_5B_|_(RefSeq)_signal_transducer_and_activator_of_transcription_5A-like_isoform_X1_(A)	YES
HiC_scaffold_2	31286308	intron_variant	NA	31261872	31288375	evm.model.001408F_PILON.16	XP_021358142.1	uncharacterized_protein_LOC110453511__[Mizuhopecten_yessoensis]	sp|Q6VVW5|ANPRB_MOUSE	Atrial_natriuretic_peptide_receptor_2_OS=Mus_musculus_OX=10090_GN=Npr2_PE=1_SV=2	spis:111334554	K12323_atrial_natriuretic_peptide_receptor_A_[EC:4.6.1.2]_|_(RefSeq)_atrial_natriuretic_peptide_receptor_1-like_(A)	YES
HiC_scaffold_2	31409392	intron_variant	NA	31384590	31429394	evm.model.001242F_PILON.8	XP_007897863.1	PREDICTED:_mucin-19-like__[Callorhinchus_milii]	sp|Q9BXJ4|C1QT3_HUMAN	Complement_C1q_tumor_necrosis_factor-related_protein_3_OS=Homo_sapiens_OX=9606_GN=C1QTNF3_PE=1_SV=1	myi:110452027	K23284_C1q-related_factor_|_(RefSeq)_C1q-related_factor-like_isoform_X1_(A)	YES
HiC_scaffold_2	31424488	intron_variant	NA	31384590	31429394	evm.model.001242F_PILON.8	XP_007897863.1	PREDICTED:_mucin-19-like__[Callorhinchus_milii]	sp|Q9BXJ4|C1QT3_HUMAN	Complement_C1q_tumor_necrosis_factor-related_protein_3_OS=Homo_sapiens_OX=9606_GN=C1QTNF3_PE=1_SV=1	myi:110452027	K23284_C1q-related_factor_|_(RefSeq)_C1q-related_factor-like_isoform_X1_(A)	YES
HiC_scaffold_2	31424506	intron_variant	NA	31384590	31429394	evm.model.001242F_PILON.8	XP_007897863.1	PREDICTED:_mucin-19-like__[Callorhinchus_milii]	sp|Q9BXJ4|C1QT3_HUMAN	Complement_C1q_tumor_necrosis_factor-related_protein_3_OS=Homo_sapiens_OX=9606_GN=C1QTNF3_PE=1_SV=1	myi:110452027	K23284_C1q-related_factor_|_(RefSeq)_C1q-related_factor-like_isoform_X1_(A)	YES
HiC_scaffold_2	31424468	intron_variant	NA	31384590	31429394	evm.model.001242F_PILON.8	XP_007897863.1	PREDICTED:_mucin-19-like__[Callorhinchus_milii]	sp|Q9BXJ4|C1QT3_HUMAN	Complement_C1q_tumor_necrosis_factor-related_protein_3_OS=Homo_sapiens_OX=9606_GN=C1QTNF3_PE=1_SV=1	myi:110452027	K23284_C1q-related_factor_|_(RefSeq)_C1q-related_factor-like_isoform_X1_(A)	YES
HiC_scaffold_2	31424447	intron_variant	NA	31384590	31429394	evm.model.001242F_PILON.8	XP_007897863.1	PREDICTED:_mucin-19-like__[Callorhinchus_milii]	sp|Q9BXJ4|C1QT3_HUMAN	Complement_C1q_tumor_necrosis_factor-related_protein_3_OS=Homo_sapiens_OX=9606_GN=C1QTNF3_PE=1_SV=1	myi:110452027	K23284_C1q-related_factor_|_(RefSeq)_C1q-related_factor-like_isoform_X1_(A)	YES
HiC_scaffold_2	31432820	downstream_gene_variant	NA	31384590	31429394	evm.model.001242F_PILON.8	XP_007897863.1	PREDICTED:_mucin-19-like__[Callorhinchus_milii]	sp|Q9BXJ4|C1QT3_HUMAN	Complement_C1q_tumor_necrosis_factor-related_protein_3_OS=Homo_sapiens_OX=9606_GN=C1QTNF3_PE=1_SV=1	myi:110452027	K23284_C1q-related_factor_|_(RefSeq)_C1q-related_factor-like_isoform_X1_(A)	NO
HiC_scaffold_2	31451551	upstream_gene_variant	NA	31450121	31450735	evm.model.001242F_PILON.9	XP_006817081.1	PREDICTED:_probable_GPI-anchored_adhesin-like_protein_PGA55-like__[Saccoglossus_kowalevskii]	sp|Q6H236|PEG3_BOVIN	Paternally-expressed_gene_3_protein_OS=Bos_taurus_OX=9913_GN=PEG3_PE=2_SV=1	myi:110447873	K18626_trichohyalin_|_(RefSeq)_trichohyalin-like_(A)	NO
HiC_scaffold_2	31451568	upstream_gene_variant	NA	31450121	31450735	evm.model.001242F_PILON.9	XP_006817081.1	PREDICTED:_probable_GPI-anchored_adhesin-like_protein_PGA55-like__[Saccoglossus_kowalevskii]	sp|Q6H236|PEG3_BOVIN	Paternally-expressed_gene_3_protein_OS=Bos_taurus_OX=9913_GN=PEG3_PE=2_SV=1	myi:110447873	K18626_trichohyalin_|_(RefSeq)_trichohyalin-like_(A)	NO
HiC_scaffold_2	31461161	downstream_gene_variant	NA	31452770	31461074	evm.model.001242F_PILON.10	XP_021355955.1	homeobox_protein_vab-7-like__[Mizuhopecten_yessoensis]	sp|P50476|HOX3_XENLA	Homeobox_protein_XHOX-3_OS=Xenopus_laevis_OX=8355_GN=xhox3_PE=2_SV=1	myi:110452018	K09320_homeobox_even-skipped_homolog_protein_|_(RefSeq)_homeobox_protein_vab-7-like_(A)	NO
HiC_scaffold_2	31902537	intron_variant	NA	31897121	31912329	evm.model.000039F_PILON.97	XP_021340544.1	atrial_natriuretic_peptide_receptor_1-like__[Mizuhopecten_yessoensis]	sp|P16066|ANPRA_HUMAN	Atrial_natriuretic_peptide_receptor_1_OS=Homo_sapiens_OX=9606_GN=NPR1_PE=1_SV=1	myi:110441660	K12323_atrial_natriuretic_peptide_receptor_A_[EC:4.6.1.2]_|_(RefSeq)_atrial_natriuretic_peptide_receptor_1-like_(A)	YES
HiC_scaffold_2	31907446	stop_gained	HIGH	31897121	31912329	evm.model.000039F_PILON.97	XP_021340544.1	atrial_natriuretic_peptide_receptor_1-like__[Mizuhopecten_yessoensis]	sp|P16066|ANPRA_HUMAN	Atrial_natriuretic_peptide_receptor_1_OS=Homo_sapiens_OX=9606_GN=NPR1_PE=1_SV=1	myi:110441660	K12323_atrial_natriuretic_peptide_receptor_A_[EC:4.6.1.2]_|_(RefSeq)_atrial_natriuretic_peptide_receptor_1-like_(A)	YES
HiC_scaffold_2	31907411	missense_variant	MODERATE	31897121	31912329	evm.model.000039F_PILON.97	XP_021340544.1	atrial_natriuretic_peptide_receptor_1-like__[Mizuhopecten_yessoensis]	sp|P16066|ANPRA_HUMAN	Atrial_natriuretic_peptide_receptor_1_OS=Homo_sapiens_OX=9606_GN=NPR1_PE=1_SV=1	myi:110441660	K12323_atrial_natriuretic_peptide_receptor_A_[EC:4.6.1.2]_|_(RefSeq)_atrial_natriuretic_peptide_receptor_1-like_(A)	YES
HiC_scaffold_2	31928071	3_prime_UTR_variant	NA	31926426	31956413	evm.model.000039F_PILON.95.1	XP_021340948.1	carnitine_O-acetyltransferase-like__[Mizuhopecten_yessoensis]	sp|P52826|CACP_COLLI	Carnitine_O-acetyltransferase_OS=Columba_livia_OX=8932_GN=CRAT_PE=1_SV=1	myi:110441945	K00624_carnitine_O-acetyltransferase_[EC:2.3.1.7]_|_(RefSeq)_carnitine_O-acetyltransferase-like_(A)	YES
HiC_scaffold_2	31928083	3_prime_UTR_variant	NA	31926426	31956413	evm.model.000039F_PILON.95.1	XP_021340948.1	carnitine_O-acetyltransferase-like__[Mizuhopecten_yessoensis]	sp|P52826|CACP_COLLI	Carnitine_O-acetyltransferase_OS=Columba_livia_OX=8932_GN=CRAT_PE=1_SV=1	myi:110441945	K00624_carnitine_O-acetyltransferase_[EC:2.3.1.7]_|_(RefSeq)_carnitine_O-acetyltransferase-like_(A)	YES
HiC_scaffold_2	31928090	3_prime_UTR_variant	NA	31926426	31956413	evm.model.000039F_PILON.95.1	XP_021340948.1	carnitine_O-acetyltransferase-like__[Mizuhopecten_yessoensis]	sp|P52826|CACP_COLLI	Carnitine_O-acetyltransferase_OS=Columba_livia_OX=8932_GN=CRAT_PE=1_SV=1	myi:110441945	K00624_carnitine_O-acetyltransferase_[EC:2.3.1.7]_|_(RefSeq)_carnitine_O-acetyltransferase-like_(A)	YES
HiC_scaffold_2	31941220	intron_variant	NA	31926426	31956413	evm.model.000039F_PILON.95.1	XP_021340948.1	carnitine_O-acetyltransferase-like__[Mizuhopecten_yessoensis]	sp|P52826|CACP_COLLI	Carnitine_O-acetyltransferase_OS=Columba_livia_OX=8932_GN=CRAT_PE=1_SV=1	myi:110441945	K00624_carnitine_O-acetyltransferase_[EC:2.3.1.7]_|_(RefSeq)_carnitine_O-acetyltransferase-like_(A)	YES
HiC_scaffold_2	31941237	intron_variant	NA	31926426	31956413	evm.model.000039F_PILON.95.1	XP_021340948.1	carnitine_O-acetyltransferase-like__[Mizuhopecten_yessoensis]	sp|P52826|CACP_COLLI	Carnitine_O-acetyltransferase_OS=Columba_livia_OX=8932_GN=CRAT_PE=1_SV=1	myi:110441945	K00624_carnitine_O-acetyltransferase_[EC:2.3.1.7]_|_(RefSeq)_carnitine_O-acetyltransferase-like_(A)	YES
HiC_scaffold_2	31941240	intron_variant	NA	31926426	31956413	evm.model.000039F_PILON.95.1	XP_021340948.1	carnitine_O-acetyltransferase-like__[Mizuhopecten_yessoensis]	sp|P52826|CACP_COLLI	Carnitine_O-acetyltransferase_OS=Columba_livia_OX=8932_GN=CRAT_PE=1_SV=1	myi:110441945	K00624_carnitine_O-acetyltransferase_[EC:2.3.1.7]_|_(RefSeq)_carnitine_O-acetyltransferase-like_(A)	YES
HiC_scaffold_2	31953583	intron_variant	NA	31926426	31956413	evm.model.000039F_PILON.95.1	XP_021340948.1	carnitine_O-acetyltransferase-like__[Mizuhopecten_yessoensis]	sp|P52826|CACP_COLLI	Carnitine_O-acetyltransferase_OS=Columba_livia_OX=8932_GN=CRAT_PE=1_SV=1	myi:110441945	K00624_carnitine_O-acetyltransferase_[EC:2.3.1.7]_|_(RefSeq)_carnitine_O-acetyltransferase-like_(A)	YES
HiC_scaffold_2	31953598	intron_variant	NA	31926426	31956413	evm.model.000039F_PILON.95.1	XP_021340948.1	carnitine_O-acetyltransferase-like__[Mizuhopecten_yessoensis]	sp|P52826|CACP_COLLI	Carnitine_O-acetyltransferase_OS=Columba_livia_OX=8932_GN=CRAT_PE=1_SV=1	myi:110441945	K00624_carnitine_O-acetyltransferase_[EC:2.3.1.7]_|_(RefSeq)_carnitine_O-acetyltransferase-like_(A)	YES
HiC_scaffold_2	31957551	upstream_gene_variant	NA	31926426	31956413	evm.model.000039F_PILON.95.1	XP_021340948.1	carnitine_O-acetyltransferase-like__[Mizuhopecten_yessoensis]	sp|P52826|CACP_COLLI	Carnitine_O-acetyltransferase_OS=Columba_livia_OX=8932_GN=CRAT_PE=1_SV=1	myi:110441945	K00624_carnitine_O-acetyltransferase_[EC:2.3.1.7]_|_(RefSeq)_carnitine_O-acetyltransferase-like_(A)	NO
HiC_scaffold_2	31979947	intergenic_region	NA	31965212	31974577	evm.model.000039F_PILON.94	XP_021340820.1	dimethylaniline_monooxygenase_[N-oxide-forming]_5-like__[Mizuhopecten_yessoensis]	sp|Q04799|FMO5_RABIT	Dimethylaniline_monooxygenase_[N-oxide-forming]_5_OS=Oryctolagus_cuniculus_OX=9986_GN=FMO5_PE=2_SV=2	myi:110441861	K00485_dimethylaniline_monooxygenase_(N-oxide_forming)_[EC:1.14.13.8]_|_(RefSeq)_dimethylaniline_monooxygenase_[N-oxide-forming]_5-like_(A)	NO
HiC_scaffold_2	31979935	intergenic_region	NA	31965212	31974577	evm.model.000039F_PILON.94	XP_021340820.1	dimethylaniline_monooxygenase_[N-oxide-forming]_5-like__[Mizuhopecten_yessoensis]	sp|Q04799|FMO5_RABIT	Dimethylaniline_monooxygenase_[N-oxide-forming]_5_OS=Oryctolagus_cuniculus_OX=9986_GN=FMO5_PE=2_SV=2	myi:110441861	K00485_dimethylaniline_monooxygenase_(N-oxide_forming)_[EC:1.14.13.8]_|_(RefSeq)_dimethylaniline_monooxygenase_[N-oxide-forming]_5-like_(A)	NO
HiC_scaffold_2	31979930	intergenic_region	NA	31965212	31974577	evm.model.000039F_PILON.94	XP_021340820.1	dimethylaniline_monooxygenase_[N-oxide-forming]_5-like__[Mizuhopecten_yessoensis]	sp|Q04799|FMO5_RABIT	Dimethylaniline_monooxygenase_[N-oxide-forming]_5_OS=Oryctolagus_cuniculus_OX=9986_GN=FMO5_PE=2_SV=2	myi:110441861	K00485_dimethylaniline_monooxygenase_(N-oxide_forming)_[EC:1.14.13.8]_|_(RefSeq)_dimethylaniline_monooxygenase_[N-oxide-forming]_5-like_(A)	NO
HiC_scaffold_2	31995106	downstream_gene_variant	NA	31965212	31974577	evm.model.000039F_PILON.94	XP_021340820.1	dimethylaniline_monooxygenase_[N-oxide-forming]_5-like__[Mizuhopecten_yessoensis]	sp|Q04799|FMO5_RABIT	Dimethylaniline_monooxygenase_[N-oxide-forming]_5_OS=Oryctolagus_cuniculus_OX=9986_GN=FMO5_PE=2_SV=2	myi:110441861	K00485_dimethylaniline_monooxygenase_(N-oxide_forming)_[EC:1.14.13.8]_|_(RefSeq)_dimethylaniline_monooxygenase_[N-oxide-forming]_5-like_(A)	NO
HiC_scaffold_2	31995120	downstream_gene_variant	NA	31965212	31974577	evm.model.000039F_PILON.94	XP_021340820.1	dimethylaniline_monooxygenase_[N-oxide-forming]_5-like__[Mizuhopecten_yessoensis]	sp|Q04799|FMO5_RABIT	Dimethylaniline_monooxygenase_[N-oxide-forming]_5_OS=Oryctolagus_cuniculus_OX=9986_GN=FMO5_PE=2_SV=2	myi:110441861	K00485_dimethylaniline_monooxygenase_(N-oxide_forming)_[EC:1.14.13.8]_|_(RefSeq)_dimethylaniline_monooxygenase_[N-oxide-forming]_5-like_(A)	NO
HiC_scaffold_2	32008643	intron_variant	NA	31995705	32017661	evm.model.000039F_PILON.93	XP_021340807.1	LIM/homeobox_protein_Lhx3-like_isoform_X4__[Mizuhopecten_yessoensis]	sp|Q90421|LHX3_DANRE	LIM/homeobox_protein_Lhx3_OS=Danio_rerio_OX=7955_GN=lhx3_PE=2_SV=1	myi:110441840	K09374_LIM_homeobox_protein_3/4_|_(RefSeq)_LIM/homeobox_protein_Lhx3-like_isoform_X1_(A)	YES
HiC_scaffold_2	32018975	upstream_gene_variant	NA	31995705	32017661	evm.model.000039F_PILON.93	XP_021340807.1	LIM/homeobox_protein_Lhx3-like_isoform_X4__[Mizuhopecten_yessoensis]	sp|Q90421|LHX3_DANRE	LIM/homeobox_protein_Lhx3_OS=Danio_rerio_OX=7955_GN=lhx3_PE=2_SV=1	myi:110441840	K09374_LIM_homeobox_protein_3/4_|_(RefSeq)_LIM/homeobox_protein_Lhx3-like_isoform_X1_(A)	NO
HiC_scaffold_2	32018976	upstream_gene_variant	NA	31995705	32017661	evm.model.000039F_PILON.93	XP_021340807.1	LIM/homeobox_protein_Lhx3-like_isoform_X4__[Mizuhopecten_yessoensis]	sp|Q90421|LHX3_DANRE	LIM/homeobox_protein_Lhx3_OS=Danio_rerio_OX=7955_GN=lhx3_PE=2_SV=1	myi:110441840	K09374_LIM_homeobox_protein_3/4_|_(RefSeq)_LIM/homeobox_protein_Lhx3-like_isoform_X1_(A)	NO
HiC_scaffold_2	32047123	intergenic_region	NA	31995705	32017661	evm.model.000039F_PILON.93	XP_021340807.1	LIM/homeobox_protein_Lhx3-like_isoform_X4__[Mizuhopecten_yessoensis]	sp|Q90421|LHX3_DANRE	LIM/homeobox_protein_Lhx3_OS=Danio_rerio_OX=7955_GN=lhx3_PE=2_SV=1	myi:110441840	K09374_LIM_homeobox_protein_3/4_|_(RefSeq)_LIM/homeobox_protein_Lhx3-like_isoform_X1_(A)	NO
HiC_scaffold_2	32047069	intergenic_region	NA	31995705	32017661	evm.model.000039F_PILON.93	XP_021340807.1	LIM/homeobox_protein_Lhx3-like_isoform_X4__[Mizuhopecten_yessoensis]	sp|Q90421|LHX3_DANRE	LIM/homeobox_protein_Lhx3_OS=Danio_rerio_OX=7955_GN=lhx3_PE=2_SV=1	myi:110441840	K09374_LIM_homeobox_protein_3/4_|_(RefSeq)_LIM/homeobox_protein_Lhx3-like_isoform_X1_(A)	NO
HiC_scaffold_2	32073373	intergenic_region	NA	31995705	32017661	evm.model.000039F_PILON.93	XP_021340807.1	LIM/homeobox_protein_Lhx3-like_isoform_X4__[Mizuhopecten_yessoensis]	sp|Q90421|LHX3_DANRE	LIM/homeobox_protein_Lhx3_OS=Danio_rerio_OX=7955_GN=lhx3_PE=2_SV=1	myi:110441840	K09374_LIM_homeobox_protein_3/4_|_(RefSeq)_LIM/homeobox_protein_Lhx3-like_isoform_X1_(A)	NO
HiC_scaffold_2	32081996	intergenic_region	NA	31995705	32017661	evm.model.000039F_PILON.93	XP_021340807.1	LIM/homeobox_protein_Lhx3-like_isoform_X4__[Mizuhopecten_yessoensis]	sp|Q90421|LHX3_DANRE	LIM/homeobox_protein_Lhx3_OS=Danio_rerio_OX=7955_GN=lhx3_PE=2_SV=1	myi:110441840	K09374_LIM_homeobox_protein_3/4_|_(RefSeq)_LIM/homeobox_protein_Lhx3-like_isoform_X1_(A)	NO
HiC_scaffold_2	32437650	intergenic_region	NA	32378619	32425697	evm.model.000039F_PILON.71	XP_021362364.1	G-protein-signaling_modulator_2-like__[Mizuhopecten_yessoensis]	sp|P81274|GPSM2_HUMAN	G-protein-signaling_modulator_2_OS=Homo_sapiens_OX=9606_GN=GPSM2_PE=1_SV=3	myi:110456128	K15837_G-protein_signaling_modulator_2_|_(RefSeq)_G-protein-signaling_modulator_2-like_(A)	NO
HiC_scaffold_2	32437579	intergenic_region	NA	32378619	32425697	evm.model.000039F_PILON.71	XP_021362364.1	G-protein-signaling_modulator_2-like__[Mizuhopecten_yessoensis]	sp|P81274|GPSM2_HUMAN	G-protein-signaling_modulator_2_OS=Homo_sapiens_OX=9606_GN=GPSM2_PE=1_SV=3	myi:110456128	K15837_G-protein_signaling_modulator_2_|_(RefSeq)_G-protein-signaling_modulator_2-like_(A)	NO
HiC_scaffold_2	32478412	intergenic_region	NA	32378619	32425697	evm.model.000039F_PILON.71	XP_021362364.1	G-protein-signaling_modulator_2-like__[Mizuhopecten_yessoensis]	sp|P81274|GPSM2_HUMAN	G-protein-signaling_modulator_2_OS=Homo_sapiens_OX=9606_GN=GPSM2_PE=1_SV=3	myi:110456128	K15837_G-protein_signaling_modulator_2_|_(RefSeq)_G-protein-signaling_modulator_2-like_(A)	NO
HiC_scaffold_2	32489494	intergenic_region	NA	32378619	32425697	evm.model.000039F_PILON.71	XP_021362364.1	G-protein-signaling_modulator_2-like__[Mizuhopecten_yessoensis]	sp|P81274|GPSM2_HUMAN	G-protein-signaling_modulator_2_OS=Homo_sapiens_OX=9606_GN=GPSM2_PE=1_SV=3	myi:110456128	K15837_G-protein_signaling_modulator_2_|_(RefSeq)_G-protein-signaling_modulator_2-like_(A)	NO
HiC_scaffold_2	32494207	upstream_gene_variant	NA	32378619	32425697	evm.model.000039F_PILON.71	XP_021362364.1	G-protein-signaling_modulator_2-like__[Mizuhopecten_yessoensis]	sp|P81274|GPSM2_HUMAN	G-protein-signaling_modulator_2_OS=Homo_sapiens_OX=9606_GN=GPSM2_PE=1_SV=3	myi:110456128	K15837_G-protein_signaling_modulator_2_|_(RefSeq)_G-protein-signaling_modulator_2-like_(A)	NO
HiC_scaffold_2	32497522	intron_variant	NA	32495690	32513082	evm.model.000039F_PILON.69	XP_021362363.1	pre-mRNA-splicing_factor_SYF1-like__[Mizuhopecten_yessoensis]	sp|Q9DCD2|SYF1_MOUSE	Pre-mRNA-splicing_factor_SYF1_OS=Mus_musculus_OX=10090_GN=Xab2_PE=1_SV=1	myi:110456127	K12867_pre-mRNA-splicing_factor_SYF1_|_(RefSeq)_pre-mRNA-splicing_factor_SYF1-like_(A)	YES
HiC_scaffold_2	32618762	downstream_gene_variant	NA	32584025	32587276	evm.model.000039F_PILON.63	XP_021362390.1	uncharacterized_protein_LOC110456147__[Mizuhopecten_yessoensis]	NA	NA	NA	NA	NO
HiC_scaffold_2	32638989	intron_variant	NA	32626012	32640225	evm.model.000039F_PILON.59	XP_021355984.1	probable_inactive_1-aminocyclopropane-1-carboxylate_synthase-like_protein_2__[Mizuhopecten_yessoensis]	sp|Q4AC99|1A1L2_HUMAN	Probable_inactive_1-aminocyclopropane-1-carboxylate_synthase-like_protein_2_OS=Homo_sapiens_OX=9606_GN=ACCSL_PE=2_SV=3	dosa:Os06t0130400-01	K14270_aminotransferase_|_(RAP-DB)_Os06g0130400,_ACS6,_ACC_SYNTHASE_6;_Similar_to_1-aminocyclopropane-1-carboxylate_synthase_(EC_4.4.1.14)_(Fragment)._(A)	YES
HiC_scaffold_2	32638973	intron_variant	NA	32626012	32640225	evm.model.000039F_PILON.59	XP_021355984.1	probable_inactive_1-aminocyclopropane-1-carboxylate_synthase-like_protein_2__[Mizuhopecten_yessoensis]	sp|Q4AC99|1A1L2_HUMAN	Probable_inactive_1-aminocyclopropane-1-carboxylate_synthase-like_protein_2_OS=Homo_sapiens_OX=9606_GN=ACCSL_PE=2_SV=3	dosa:Os06t0130400-01	K14270_aminotransferase_|_(RAP-DB)_Os06g0130400,_ACS6,_ACC_SYNTHASE_6;_Similar_to_1-aminocyclopropane-1-carboxylate_synthase_(EC_4.4.1.14)_(Fragment)._(A)	YES
HiC_scaffold_2	32661805	upstream_gene_variant	NA	32651351	32661424	evm.model.000039F_PILON.58	XP_021355984.1	probable_inactive_1-aminocyclopropane-1-carboxylate_synthase-like_protein_2__[Mizuhopecten_yessoensis]	sp|Q4AC99|1A1L2_HUMAN	Probable_inactive_1-aminocyclopropane-1-carboxylate_synthase-like_protein_2_OS=Homo_sapiens_OX=9606_GN=ACCSL_PE=2_SV=3	dosa:Os06t0130400-01	K14270_aminotransferase_|_(RAP-DB)_Os06g0130400,_ACS6,_ACC_SYNTHASE_6;_Similar_to_1-aminocyclopropane-1-carboxylate_synthase_(EC_4.4.1.14)_(Fragment)._(A)	NO
HiC_scaffold_2	32678140	downstream_gene_variant	NA	32669354	32671773	evm.model.000039F_PILON.56	XP_021356023.1	perlucin-like__[Mizuhopecten_yessoensis]	sp|P86854|PLCL_MYTGA	Perlucin-like_protein_OS=Mytilus_galloprovincialis_OX=29158_PE=1_SV=1	myi:110452063	K06468_low_affinity_immunoglobulin_epsilon_Fc_receptor_|_(RefSeq)_perlucin-like_(A)	NO
HiC_scaffold_2	32678110	downstream_gene_variant	NA	32669354	32671773	evm.model.000039F_PILON.56	XP_021356023.1	perlucin-like__[Mizuhopecten_yessoensis]	sp|P86854|PLCL_MYTGA	Perlucin-like_protein_OS=Mytilus_galloprovincialis_OX=29158_PE=1_SV=1	myi:110452063	K06468_low_affinity_immunoglobulin_epsilon_Fc_receptor_|_(RefSeq)_perlucin-like_(A)	NO
HiC_scaffold_2	32678098	downstream_gene_variant	NA	32669354	32671773	evm.model.000039F_PILON.56	XP_021356023.1	perlucin-like__[Mizuhopecten_yessoensis]	sp|P86854|PLCL_MYTGA	Perlucin-like_protein_OS=Mytilus_galloprovincialis_OX=29158_PE=1_SV=1	myi:110452063	K06468_low_affinity_immunoglobulin_epsilon_Fc_receptor_|_(RefSeq)_perlucin-like_(A)	NO
HiC_scaffold_2	32686899	upstream_gene_variant	NA	32679492	32683149	evm.model.000039F_PILON.55	XP_021356042.1	perlucin-like_protein__[Mizuhopecten_yessoensis]	sp|A6QP79|COL12_BOVIN	Collectin-12_OS=Bos_taurus_OX=9913_GN=COLEC12_PE=2_SV=1	myi:110452063	K06468_low_affinity_immunoglobulin_epsilon_Fc_receptor_|_(RefSeq)_perlucin-like_(A)	NO
HiC_scaffold_2	32699631	upstream_gene_variant	NA	32696469	32698230	evm.model.000039F_PILON.53	XP_021356848.1	perlucin-like_protein__[Mizuhopecten_yessoensis]	sp|P86854|PLCL_MYTGA	Perlucin-like_protein_OS=Mytilus_galloprovincialis_OX=29158_PE=1_SV=1	myi:110452063	K06468_low_affinity_immunoglobulin_epsilon_Fc_receptor_|_(RefSeq)_perlucin-like_(A)	NO
HiC_scaffold_2	33101227	intergenic_region	NA	33017343	33046677	evm.model.000039F_PILON.37	XP_021345170.1	homeobox_protein_Hox-A1-like__[Mizuhopecten_yessoensis]	sp|Q08821|HXA1_XENLA	Homeobox_protein_Hox-A1_(Fragment)_OS=Xenopus_laevis_OX=8355_GN=hoxa1_PE=2_SV=1	myi:110445101	K09301_homeobox_protein_HoxA/B/D1_|_(RefSeq)_homeobox_protein_Hox-A1-like_(A)	NO
HiC_scaffold_2	33124349	intergenic_region	NA	33017343	33046677	evm.model.000039F_PILON.37	XP_021345170.1	homeobox_protein_Hox-A1-like__[Mizuhopecten_yessoensis]	sp|Q08821|HXA1_XENLA	Homeobox_protein_Hox-A1_(Fragment)_OS=Xenopus_laevis_OX=8355_GN=hoxa1_PE=2_SV=1	myi:110445101	K09301_homeobox_protein_HoxA/B/D1_|_(RefSeq)_homeobox_protein_Hox-A1-like_(A)	NO
HiC_scaffold_2	33124346	intergenic_region	NA	33017343	33046677	evm.model.000039F_PILON.37	XP_021345170.1	homeobox_protein_Hox-A1-like__[Mizuhopecten_yessoensis]	sp|Q08821|HXA1_XENLA	Homeobox_protein_Hox-A1_(Fragment)_OS=Xenopus_laevis_OX=8355_GN=hoxa1_PE=2_SV=1	myi:110445101	K09301_homeobox_protein_HoxA/B/D1_|_(RefSeq)_homeobox_protein_Hox-A1-like_(A)	NO
HiC_scaffold_2	33171067	intron_variant	NA	33139336	33177252	evm.model.000039F_PILON.35	XP_021345165.1	uncharacterized_protein_DDB_G0283357-like__[Mizuhopecten_yessoensis]	sp|Q0VCS4|HXA2_BOVIN	Homeobox_protein_Hox-A2_OS=Bos_taurus_OX=9913_GN=HOXA2_PE=2_SV=1	myi:110445098	K09302_homeobox_protein_HoxA/B2_|_(RefSeq)_uncharacterized_protein_DDB_G0283357-like_(A)	YES
HiC_scaffold_2	33191823	intergenic_region	NA	33139336	33177252	evm.model.000039F_PILON.35	XP_021345165.1	uncharacterized_protein_DDB_G0283357-like__[Mizuhopecten_yessoensis]	sp|Q0VCS4|HXA2_BOVIN	Homeobox_protein_Hox-A2_OS=Bos_taurus_OX=9913_GN=HOXA2_PE=2_SV=1	myi:110445098	K09302_homeobox_protein_HoxA/B2_|_(RefSeq)_uncharacterized_protein_DDB_G0283357-like_(A)	NO
HiC_scaffold_2	33191800	intergenic_region	NA	33139336	33177252	evm.model.000039F_PILON.35	XP_021345165.1	uncharacterized_protein_DDB_G0283357-like__[Mizuhopecten_yessoensis]	sp|Q0VCS4|HXA2_BOVIN	Homeobox_protein_Hox-A2_OS=Bos_taurus_OX=9913_GN=HOXA2_PE=2_SV=1	myi:110445098	K09302_homeobox_protein_HoxA/B2_|_(RefSeq)_uncharacterized_protein_DDB_G0283357-like_(A)	NO
HiC_scaffold_2	33306434	intergenic_region	NA	33271410	33276526	evm.model.000039F_PILON.34	XP_021345097.1	homeobox_protein_Hox-B3-like__[Mizuhopecten_yessoensis]	sp|A1L2P5|HXD3_XENLA	Homeobox_protein_Hox-D3_OS=Xenopus_laevis_OX=8355_GN=hoxd3_PE=2_SV=1	myi:110445065	K09303_homeobox_protein_HoxA/B/D3_|_(RefSeq)_homeobox_protein_Hox-B3-like_(A)	NO
HiC_scaffold_2	33306450	intergenic_region	NA	33271410	33276526	evm.model.000039F_PILON.34	XP_021345097.1	homeobox_protein_Hox-B3-like__[Mizuhopecten_yessoensis]	sp|A1L2P5|HXD3_XENLA	Homeobox_protein_Hox-D3_OS=Xenopus_laevis_OX=8355_GN=hoxd3_PE=2_SV=1	myi:110445065	K09303_homeobox_protein_HoxA/B/D3_|_(RefSeq)_homeobox_protein_Hox-B3-like_(A)	NO
HiC_scaffold_2	33306399	intergenic_region	NA	33271410	33276526	evm.model.000039F_PILON.34	XP_021345097.1	homeobox_protein_Hox-B3-like__[Mizuhopecten_yessoensis]	sp|A1L2P5|HXD3_XENLA	Homeobox_protein_Hox-D3_OS=Xenopus_laevis_OX=8355_GN=hoxd3_PE=2_SV=1	myi:110445065	K09303_homeobox_protein_HoxA/B/D3_|_(RefSeq)_homeobox_protein_Hox-B3-like_(A)	NO
HiC_scaffold_2	33306378	intergenic_region	NA	33271410	33276526	evm.model.000039F_PILON.34	XP_021345097.1	homeobox_protein_Hox-B3-like__[Mizuhopecten_yessoensis]	sp|A1L2P5|HXD3_XENLA	Homeobox_protein_Hox-D3_OS=Xenopus_laevis_OX=8355_GN=hoxd3_PE=2_SV=1	myi:110445065	K09303_homeobox_protein_HoxA/B/D3_|_(RefSeq)_homeobox_protein_Hox-B3-like_(A)	NO
HiC_scaffold_2	33306375	intergenic_region	NA	33271410	33276526	evm.model.000039F_PILON.34	XP_021345097.1	homeobox_protein_Hox-B3-like__[Mizuhopecten_yessoensis]	sp|A1L2P5|HXD3_XENLA	Homeobox_protein_Hox-D3_OS=Xenopus_laevis_OX=8355_GN=hoxd3_PE=2_SV=1	myi:110445065	K09303_homeobox_protein_HoxA/B/D3_|_(RefSeq)_homeobox_protein_Hox-B3-like_(A)	NO
HiC_scaffold_2	33312534	intergenic_region	NA	33271410	33276526	evm.model.000039F_PILON.34	XP_021345097.1	homeobox_protein_Hox-B3-like__[Mizuhopecten_yessoensis]	sp|A1L2P5|HXD3_XENLA	Homeobox_protein_Hox-D3_OS=Xenopus_laevis_OX=8355_GN=hoxd3_PE=2_SV=1	myi:110445065	K09303_homeobox_protein_HoxA/B/D3_|_(RefSeq)_homeobox_protein_Hox-B3-like_(A)	NO
HiC_scaffold_2	33312550	intergenic_region	NA	33271410	33276526	evm.model.000039F_PILON.34	XP_021345097.1	homeobox_protein_Hox-B3-like__[Mizuhopecten_yessoensis]	sp|A1L2P5|HXD3_XENLA	Homeobox_protein_Hox-D3_OS=Xenopus_laevis_OX=8355_GN=hoxd3_PE=2_SV=1	myi:110445065	K09303_homeobox_protein_HoxA/B/D3_|_(RefSeq)_homeobox_protein_Hox-B3-like_(A)	NO
HiC_scaffold_2	33312557	intergenic_region	NA	33271410	33276526	evm.model.000039F_PILON.34	XP_021345097.1	homeobox_protein_Hox-B3-like__[Mizuhopecten_yessoensis]	sp|A1L2P5|HXD3_XENLA	Homeobox_protein_Hox-D3_OS=Xenopus_laevis_OX=8355_GN=hoxd3_PE=2_SV=1	myi:110445065	K09303_homeobox_protein_HoxA/B/D3_|_(RefSeq)_homeobox_protein_Hox-B3-like_(A)	NO
HiC_scaffold_2	33340696	intergenic_region	NA	33271410	33276526	evm.model.000039F_PILON.34	XP_021345097.1	homeobox_protein_Hox-B3-like__[Mizuhopecten_yessoensis]	sp|A1L2P5|HXD3_XENLA	Homeobox_protein_Hox-D3_OS=Xenopus_laevis_OX=8355_GN=hoxd3_PE=2_SV=1	myi:110445065	K09303_homeobox_protein_HoxA/B/D3_|_(RefSeq)_homeobox_protein_Hox-B3-like_(A)	NO
HiC_scaffold_2	33379430	intergenic_region	NA	33271410	33276526	evm.model.000039F_PILON.34	XP_021345097.1	homeobox_protein_Hox-B3-like__[Mizuhopecten_yessoensis]	sp|A1L2P5|HXD3_XENLA	Homeobox_protein_Hox-D3_OS=Xenopus_laevis_OX=8355_GN=hoxd3_PE=2_SV=1	myi:110445065	K09303_homeobox_protein_HoxA/B/D3_|_(RefSeq)_homeobox_protein_Hox-B3-like_(A)	NO
HiC_scaffold_2	33382962	intergenic_region	NA	33271410	33276526	evm.model.000039F_PILON.34	XP_021345097.1	homeobox_protein_Hox-B3-like__[Mizuhopecten_yessoensis]	sp|A1L2P5|HXD3_XENLA	Homeobox_protein_Hox-D3_OS=Xenopus_laevis_OX=8355_GN=hoxd3_PE=2_SV=1	myi:110445065	K09303_homeobox_protein_HoxA/B/D3_|_(RefSeq)_homeobox_protein_Hox-B3-like_(A)	NO
HiC_scaffold_2	33382967	intergenic_region	NA	33271410	33276526	evm.model.000039F_PILON.34	XP_021345097.1	homeobox_protein_Hox-B3-like__[Mizuhopecten_yessoensis]	sp|A1L2P5|HXD3_XENLA	Homeobox_protein_Hox-D3_OS=Xenopus_laevis_OX=8355_GN=hoxd3_PE=2_SV=1	myi:110445065	K09303_homeobox_protein_HoxA/B/D3_|_(RefSeq)_homeobox_protein_Hox-B3-like_(A)	NO
HiC_scaffold_2	33382975	intergenic_region	NA	33271410	33276526	evm.model.000039F_PILON.34	XP_021345097.1	homeobox_protein_Hox-B3-like__[Mizuhopecten_yessoensis]	sp|A1L2P5|HXD3_XENLA	Homeobox_protein_Hox-D3_OS=Xenopus_laevis_OX=8355_GN=hoxd3_PE=2_SV=1	myi:110445065	K09303_homeobox_protein_HoxA/B/D3_|_(RefSeq)_homeobox_protein_Hox-B3-like_(A)	NO
HiC_scaffold_2	33382977	intergenic_region	NA	33271410	33276526	evm.model.000039F_PILON.34	XP_021345097.1	homeobox_protein_Hox-B3-like__[Mizuhopecten_yessoensis]	sp|A1L2P5|HXD3_XENLA	Homeobox_protein_Hox-D3_OS=Xenopus_laevis_OX=8355_GN=hoxd3_PE=2_SV=1	myi:110445065	K09303_homeobox_protein_HoxA/B/D3_|_(RefSeq)_homeobox_protein_Hox-B3-like_(A)	NO
HiC_scaffold_2	33396882	intergenic_region	NA	33271410	33276526	evm.model.000039F_PILON.34	XP_021345097.1	homeobox_protein_Hox-B3-like__[Mizuhopecten_yessoensis]	sp|A1L2P5|HXD3_XENLA	Homeobox_protein_Hox-D3_OS=Xenopus_laevis_OX=8355_GN=hoxd3_PE=2_SV=1	myi:110445065	K09303_homeobox_protein_HoxA/B/D3_|_(RefSeq)_homeobox_protein_Hox-B3-like_(A)	NO
HiC_scaffold_2	33428900	intergenic_region	NA	33271410	33276526	evm.model.000039F_PILON.34	XP_021345097.1	homeobox_protein_Hox-B3-like__[Mizuhopecten_yessoensis]	sp|A1L2P5|HXD3_XENLA	Homeobox_protein_Hox-D3_OS=Xenopus_laevis_OX=8355_GN=hoxd3_PE=2_SV=1	myi:110445065	K09303_homeobox_protein_HoxA/B/D3_|_(RefSeq)_homeobox_protein_Hox-B3-like_(A)	NO
HiC_scaffold_2	33434440	intergenic_region	NA	33271410	33276526	evm.model.000039F_PILON.34	XP_021345097.1	homeobox_protein_Hox-B3-like__[Mizuhopecten_yessoensis]	sp|A1L2P5|HXD3_XENLA	Homeobox_protein_Hox-D3_OS=Xenopus_laevis_OX=8355_GN=hoxd3_PE=2_SV=1	myi:110445065	K09303_homeobox_protein_HoxA/B/D3_|_(RefSeq)_homeobox_protein_Hox-B3-like_(A)	NO
HiC_scaffold_2	33443892	downstream_gene_variant	NA	33271410	33276526	evm.model.000039F_PILON.34	XP_021345097.1	homeobox_protein_Hox-B3-like__[Mizuhopecten_yessoensis]	sp|A1L2P5|HXD3_XENLA	Homeobox_protein_Hox-D3_OS=Xenopus_laevis_OX=8355_GN=hoxd3_PE=2_SV=1	myi:110445065	K09303_homeobox_protein_HoxA/B/D3_|_(RefSeq)_homeobox_protein_Hox-B3-like_(A)	NO
HiC_scaffold_2	33452320	intron_variant	NA	33445332	33454667	evm.model.000039F_PILON.32	XP_021345157.1	homeobox_protein_Hox-A4-like__[Mizuhopecten_yessoensis]	sp|P14840|HXB4_CHICK	Homeobox_protein_Hox-B4_OS=Gallus_gallus_OX=9031_GN=HOXB4_PE=2_SV=1	myi:110445094	K09304_homeobox_protein_HoxA/B/C/D4_|_(RefSeq)_homeobox_protein_Hox-A4-like_(A)	YES
HiC_scaffold_2	33471033	intergenic_region	NA	33445332	33454667	evm.model.000039F_PILON.32	XP_021345157.1	homeobox_protein_Hox-A4-like__[Mizuhopecten_yessoensis]	sp|P14840|HXB4_CHICK	Homeobox_protein_Hox-B4_OS=Gallus_gallus_OX=9031_GN=HOXB4_PE=2_SV=1	myi:110445094	K09304_homeobox_protein_HoxA/B/C/D4_|_(RefSeq)_homeobox_protein_Hox-A4-like_(A)	NO
HiC_scaffold_2	33476802	intergenic_region	NA	33445332	33454667	evm.model.000039F_PILON.32	XP_021345157.1	homeobox_protein_Hox-A4-like__[Mizuhopecten_yessoensis]	sp|P14840|HXB4_CHICK	Homeobox_protein_Hox-B4_OS=Gallus_gallus_OX=9031_GN=HOXB4_PE=2_SV=1	myi:110445094	K09304_homeobox_protein_HoxA/B/C/D4_|_(RefSeq)_homeobox_protein_Hox-A4-like_(A)	NO
HiC_scaffold_2	33521827	intergenic_region	NA	33514256	33515907	evm.model.000039F_PILON.30	OWF54796.1	Hyaluronan_mediated_motility_receptor__[Mizuhopecten_yessoensis]	sp|O88799|ZAN_MOUSE	Zonadhesin_OS=Mus_musculus_OX=10090_GN=Zan_PE=1_SV=1	pki:111844400	K19346_nesprin-2_|_(RefSeq)_nesprin-2-like_isoform_X1_(A)	NO
HiC_scaffold_2	33521804	intergenic_region	NA	33514256	33515907	evm.model.000039F_PILON.30	OWF54796.1	Hyaluronan_mediated_motility_receptor__[Mizuhopecten_yessoensis]	sp|O88799|ZAN_MOUSE	Zonadhesin_OS=Mus_musculus_OX=10090_GN=Zan_PE=1_SV=1	pki:111844400	K19346_nesprin-2_|_(RefSeq)_nesprin-2-like_isoform_X1_(A)	NO
HiC_scaffold_2	33536443	intergenic_region	NA	33514256	33515907	evm.model.000039F_PILON.30	OWF54796.1	Hyaluronan_mediated_motility_receptor__[Mizuhopecten_yessoensis]	sp|O88799|ZAN_MOUSE	Zonadhesin_OS=Mus_musculus_OX=10090_GN=Zan_PE=1_SV=1	pki:111844400	K19346_nesprin-2_|_(RefSeq)_nesprin-2-like_isoform_X1_(A)	NO
HiC_scaffold_2	33558761	intergenic_region	NA	33514256	33515907	evm.model.000039F_PILON.30	OWF54796.1	Hyaluronan_mediated_motility_receptor__[Mizuhopecten_yessoensis]	sp|O88799|ZAN_MOUSE	Zonadhesin_OS=Mus_musculus_OX=10090_GN=Zan_PE=1_SV=1	pki:111844400	K19346_nesprin-2_|_(RefSeq)_nesprin-2-like_isoform_X1_(A)	NO
HiC_scaffold_2	33558783	intergenic_region	NA	33514256	33515907	evm.model.000039F_PILON.30	OWF54796.1	Hyaluronan_mediated_motility_receptor__[Mizuhopecten_yessoensis]	sp|O88799|ZAN_MOUSE	Zonadhesin_OS=Mus_musculus_OX=10090_GN=Zan_PE=1_SV=1	pki:111844400	K19346_nesprin-2_|_(RefSeq)_nesprin-2-like_isoform_X1_(A)	NO
HiC_scaffold_2	33563456	intergenic_region	NA	33514256	33515907	evm.model.000039F_PILON.30	OWF54796.1	Hyaluronan_mediated_motility_receptor__[Mizuhopecten_yessoensis]	sp|O88799|ZAN_MOUSE	Zonadhesin_OS=Mus_musculus_OX=10090_GN=Zan_PE=1_SV=1	pki:111844400	K19346_nesprin-2_|_(RefSeq)_nesprin-2-like_isoform_X1_(A)	NO
HiC_scaffold_2	33563463	intergenic_region	NA	33514256	33515907	evm.model.000039F_PILON.30	OWF54796.1	Hyaluronan_mediated_motility_receptor__[Mizuhopecten_yessoensis]	sp|O88799|ZAN_MOUSE	Zonadhesin_OS=Mus_musculus_OX=10090_GN=Zan_PE=1_SV=1	pki:111844400	K19346_nesprin-2_|_(RefSeq)_nesprin-2-like_isoform_X1_(A)	NO
HiC_scaffold_2	33575941	intron_variant	NA	33570994	33602033	evm.model.000039F_PILON.27	XP_021345158.1	homeobox_protein_Hox-B4-like__[Mizuhopecten_yessoensis]	sp|P09014|HXB5A_DANRE	Homeobox_protein_Hox-B5a_OS=Danio_rerio_OX=7955_GN=hoxb5a_PE=2_SV=2	myi:110445095	K09305_homeobox_protein_HoxA/B/C5_|_(RefSeq)_homeobox_protein_Hox-B4-like_(A)	YES
HiC_scaffold_2	33575944	intron_variant	NA	33570994	33602033	evm.model.000039F_PILON.27	XP_021345158.1	homeobox_protein_Hox-B4-like__[Mizuhopecten_yessoensis]	sp|P09014|HXB5A_DANRE	Homeobox_protein_Hox-B5a_OS=Danio_rerio_OX=7955_GN=hoxb5a_PE=2_SV=2	myi:110445095	K09305_homeobox_protein_HoxA/B/C5_|_(RefSeq)_homeobox_protein_Hox-B4-like_(A)	YES
HiC_scaffold_2	33575945	intron_variant	NA	33570994	33602033	evm.model.000039F_PILON.27	XP_021345158.1	homeobox_protein_Hox-B4-like__[Mizuhopecten_yessoensis]	sp|P09014|HXB5A_DANRE	Homeobox_protein_Hox-B5a_OS=Danio_rerio_OX=7955_GN=hoxb5a_PE=2_SV=2	myi:110445095	K09305_homeobox_protein_HoxA/B/C5_|_(RefSeq)_homeobox_protein_Hox-B4-like_(A)	YES
HiC_scaffold_2	33592834	intron_variant	NA	33570994	33602033	evm.model.000039F_PILON.27	XP_021345158.1	homeobox_protein_Hox-B4-like__[Mizuhopecten_yessoensis]	sp|P09014|HXB5A_DANRE	Homeobox_protein_Hox-B5a_OS=Danio_rerio_OX=7955_GN=hoxb5a_PE=2_SV=2	myi:110445095	K09305_homeobox_protein_HoxA/B/C5_|_(RefSeq)_homeobox_protein_Hox-B4-like_(A)	YES
HiC_scaffold_2	33718237	intergenic_region	NA	33570994	33602033	evm.model.000039F_PILON.27	XP_021345158.1	homeobox_protein_Hox-B4-like__[Mizuhopecten_yessoensis]	sp|P09014|HXB5A_DANRE	Homeobox_protein_Hox-B5a_OS=Danio_rerio_OX=7955_GN=hoxb5a_PE=2_SV=2	myi:110445095	K09305_homeobox_protein_HoxA/B/C5_|_(RefSeq)_homeobox_protein_Hox-B4-like_(A)	NO
HiC_scaffold_2	33776255	intergenic_region	NA	33763446	33764120	evm.model.000039F_PILON.22	XP_027143059.1	uncharacterized_protein_LOC113747438_isoform_X1__[Larimichthys_crocea]	NA	NA	nve:NEMVE_v1g197820	K10667_E3_ubiquitin-protein_ligase_RNF8_[EC:2.3.2.27]_|_(RefSeq)_hypothetical_protein_(A)	NO
HiC_scaffold_2	33776254	intergenic_region	NA	33763446	33764120	evm.model.000039F_PILON.22	XP_027143059.1	uncharacterized_protein_LOC113747438_isoform_X1__[Larimichthys_crocea]	NA	NA	nve:NEMVE_v1g197820	K10667_E3_ubiquitin-protein_ligase_RNF8_[EC:2.3.2.27]_|_(RefSeq)_hypothetical_protein_(A)	NO
HiC_scaffold_2	33780417	intergenic_region	NA	33763446	33764120	evm.model.000039F_PILON.22	XP_027143059.1	uncharacterized_protein_LOC113747438_isoform_X1__[Larimichthys_crocea]	NA	NA	nve:NEMVE_v1g197820	K10667_E3_ubiquitin-protein_ligase_RNF8_[EC:2.3.2.27]_|_(RefSeq)_hypothetical_protein_(A)	NO
HiC_scaffold_2	33797526	intergenic_region	NA	33763446	33764120	evm.model.000039F_PILON.22	XP_027143059.1	uncharacterized_protein_LOC113747438_isoform_X1__[Larimichthys_crocea]	NA	NA	nve:NEMVE_v1g197820	K10667_E3_ubiquitin-protein_ligase_RNF8_[EC:2.3.2.27]_|_(RefSeq)_hypothetical_protein_(A)	NO
HiC_scaffold_2	33797522	intergenic_region	NA	33763446	33764120	evm.model.000039F_PILON.22	XP_027143059.1	uncharacterized_protein_LOC113747438_isoform_X1__[Larimichthys_crocea]	NA	NA	nve:NEMVE_v1g197820	K10667_E3_ubiquitin-protein_ligase_RNF8_[EC:2.3.2.27]_|_(RefSeq)_hypothetical_protein_(A)	NO
HiC_scaffold_2	33828199	intergenic_region	NA	33763446	33764120	evm.model.000039F_PILON.22	XP_027143059.1	uncharacterized_protein_LOC113747438_isoform_X1__[Larimichthys_crocea]	NA	NA	nve:NEMVE_v1g197820	K10667_E3_ubiquitin-protein_ligase_RNF8_[EC:2.3.2.27]_|_(RefSeq)_hypothetical_protein_(A)	NO
HiC_scaffold_2	33828201	intergenic_region	NA	33763446	33764120	evm.model.000039F_PILON.22	XP_027143059.1	uncharacterized_protein_LOC113747438_isoform_X1__[Larimichthys_crocea]	NA	NA	nve:NEMVE_v1g197820	K10667_E3_ubiquitin-protein_ligase_RNF8_[EC:2.3.2.27]_|_(RefSeq)_hypothetical_protein_(A)	NO
HiC_scaffold_2	33856834	intron_variant	NA	33835018	33865396	evm.model.000039F_PILON.20	XP_021345173.1	homeobox_protein_Hox-B5-like__[Mizuhopecten_yessoensis]	sp|A1YFA5|HXB7_GORGO	Homeobox_protein_Hox-B7_OS=Gorilla_gorilla_gorilla_OX=9595_GN=HOXB7_PE=3_SV=1	myi:110445103	K09311_Antp_family,_other_|_(RefSeq)_homeobox_protein_Hox-B5-like_(A)	YES
HiC_scaffold_2	33880452	intergenic_region	NA	33835018	33865396	evm.model.000039F_PILON.20	XP_021345173.1	homeobox_protein_Hox-B5-like__[Mizuhopecten_yessoensis]	sp|A1YFA5|HXB7_GORGO	Homeobox_protein_Hox-B7_OS=Gorilla_gorilla_gorilla_OX=9595_GN=HOXB7_PE=3_SV=1	myi:110445103	K09311_Antp_family,_other_|_(RefSeq)_homeobox_protein_Hox-B5-like_(A)	NO
HiC_scaffold_2	33885878	intergenic_region	NA	33835018	33865396	evm.model.000039F_PILON.20	XP_021345173.1	homeobox_protein_Hox-B5-like__[Mizuhopecten_yessoensis]	sp|A1YFA5|HXB7_GORGO	Homeobox_protein_Hox-B7_OS=Gorilla_gorilla_gorilla_OX=9595_GN=HOXB7_PE=3_SV=1	myi:110445103	K09311_Antp_family,_other_|_(RefSeq)_homeobox_protein_Hox-B5-like_(A)	NO
HiC_scaffold_2	33898161	intergenic_region	NA	33835018	33865396	evm.model.000039F_PILON.20	XP_021345173.1	homeobox_protein_Hox-B5-like__[Mizuhopecten_yessoensis]	sp|A1YFA5|HXB7_GORGO	Homeobox_protein_Hox-B7_OS=Gorilla_gorilla_gorilla_OX=9595_GN=HOXB7_PE=3_SV=1	myi:110445103	K09311_Antp_family,_other_|_(RefSeq)_homeobox_protein_Hox-B5-like_(A)	NO
HiC_scaffold_2	34408810	intergenic_region	NA	34297365	34298070	evm.model.000475F_PILON.29	XP_021345166.1	homeotic_protein_ultrabithorax-like__[Mizuhopecten_yessoensis]	NA	NA	myi:110445099	K09311_Antp_family,_other_|_(RefSeq)_homeotic_protein_ultrabithorax-like_(A)	NO
HiC_scaffold_2	34408818	intergenic_region	NA	34297365	34298070	evm.model.000475F_PILON.29	XP_021345166.1	homeotic_protein_ultrabithorax-like__[Mizuhopecten_yessoensis]	NA	NA	myi:110445099	K09311_Antp_family,_other_|_(RefSeq)_homeotic_protein_ultrabithorax-like_(A)	NO
HiC_scaffold_2	34438503	intergenic_region	NA	34297365	34298070	evm.model.000475F_PILON.29	XP_021345166.1	homeotic_protein_ultrabithorax-like__[Mizuhopecten_yessoensis]	NA	NA	myi:110445099	K09311_Antp_family,_other_|_(RefSeq)_homeotic_protein_ultrabithorax-like_(A)	NO
HiC_scaffold_2	34438493	intergenic_region	NA	34297365	34298070	evm.model.000475F_PILON.29	XP_021345166.1	homeotic_protein_ultrabithorax-like__[Mizuhopecten_yessoensis]	NA	NA	myi:110445099	K09311_Antp_family,_other_|_(RefSeq)_homeotic_protein_ultrabithorax-like_(A)	NO
HiC_scaffold_2	34489648	upstream_gene_variant	NA	34469886	34488555	evm.model.000475F_PILON.26	XP_021345167.1	homeobox_protein_mab-5-like__[Mizuhopecten_yessoensis]	sp|P09087|ABDB_DROME	Homeobox_protein_abdominal-B_OS=Drosophila_melanogaster_OX=7227_GN=Abd-B_PE=1_SV=3	crg:105323257	K09300_homeobox_protein_abdominal-B_and_related_proteins_|_(RefSeq)_homeobox_protein_abdominal-B_(A)	NO
HiC_scaffold_2	34489652	upstream_gene_variant	NA	34469886	34488555	evm.model.000475F_PILON.26	XP_021345167.1	homeobox_protein_mab-5-like__[Mizuhopecten_yessoensis]	sp|P09087|ABDB_DROME	Homeobox_protein_abdominal-B_OS=Drosophila_melanogaster_OX=7227_GN=Abd-B_PE=1_SV=3	crg:105323257	K09300_homeobox_protein_abdominal-B_and_related_proteins_|_(RefSeq)_homeobox_protein_abdominal-B_(A)	NO
HiC_scaffold_2	34489653	upstream_gene_variant	NA	34469886	34488555	evm.model.000475F_PILON.26	XP_021345167.1	homeobox_protein_mab-5-like__[Mizuhopecten_yessoensis]	sp|P09087|ABDB_DROME	Homeobox_protein_abdominal-B_OS=Drosophila_melanogaster_OX=7227_GN=Abd-B_PE=1_SV=3	crg:105323257	K09300_homeobox_protein_abdominal-B_and_related_proteins_|_(RefSeq)_homeobox_protein_abdominal-B_(A)	NO
HiC_scaffold_2	34489658	upstream_gene_variant	NA	34469886	34488555	evm.model.000475F_PILON.26	XP_021345167.1	homeobox_protein_mab-5-like__[Mizuhopecten_yessoensis]	sp|P09087|ABDB_DROME	Homeobox_protein_abdominal-B_OS=Drosophila_melanogaster_OX=7227_GN=Abd-B_PE=1_SV=3	crg:105323257	K09300_homeobox_protein_abdominal-B_and_related_proteins_|_(RefSeq)_homeobox_protein_abdominal-B_(A)	NO
HiC_scaffold_2	34495910	intergenic_region	NA	34469886	34488555	evm.model.000475F_PILON.26	XP_021345167.1	homeobox_protein_mab-5-like__[Mizuhopecten_yessoensis]	sp|P09087|ABDB_DROME	Homeobox_protein_abdominal-B_OS=Drosophila_melanogaster_OX=7227_GN=Abd-B_PE=1_SV=3	crg:105323257	K09300_homeobox_protein_abdominal-B_and_related_proteins_|_(RefSeq)_homeobox_protein_abdominal-B_(A)	NO
HiC_scaffold_2	34624260	intergenic_region	NA	34469886	34488555	evm.model.000475F_PILON.26	XP_021345167.1	homeobox_protein_mab-5-like__[Mizuhopecten_yessoensis]	sp|P09087|ABDB_DROME	Homeobox_protein_abdominal-B_OS=Drosophila_melanogaster_OX=7227_GN=Abd-B_PE=1_SV=3	crg:105323257	K09300_homeobox_protein_abdominal-B_and_related_proteins_|_(RefSeq)_homeobox_protein_abdominal-B_(A)	NO
HiC_scaffold_2	34634818	intergenic_region	NA	34469886	34488555	evm.model.000475F_PILON.26	XP_021345167.1	homeobox_protein_mab-5-like__[Mizuhopecten_yessoensis]	sp|P09087|ABDB_DROME	Homeobox_protein_abdominal-B_OS=Drosophila_melanogaster_OX=7227_GN=Abd-B_PE=1_SV=3	crg:105323257	K09300_homeobox_protein_abdominal-B_and_related_proteins_|_(RefSeq)_homeobox_protein_abdominal-B_(A)	NO
HiC_scaffold_2	34659393	intergenic_region	NA	34469886	34488555	evm.model.000475F_PILON.26	XP_021345167.1	homeobox_protein_mab-5-like__[Mizuhopecten_yessoensis]	sp|P09087|ABDB_DROME	Homeobox_protein_abdominal-B_OS=Drosophila_melanogaster_OX=7227_GN=Abd-B_PE=1_SV=3	crg:105323257	K09300_homeobox_protein_abdominal-B_and_related_proteins_|_(RefSeq)_homeobox_protein_abdominal-B_(A)	NO
HiC_scaffold_2	34677524	intergenic_region	NA	34469886	34488555	evm.model.000475F_PILON.26	XP_021345167.1	homeobox_protein_mab-5-like__[Mizuhopecten_yessoensis]	sp|P09087|ABDB_DROME	Homeobox_protein_abdominal-B_OS=Drosophila_melanogaster_OX=7227_GN=Abd-B_PE=1_SV=3	crg:105323257	K09300_homeobox_protein_abdominal-B_and_related_proteins_|_(RefSeq)_homeobox_protein_abdominal-B_(A)	NO
HiC_scaffold_2	34677461	intergenic_region	NA	34469886	34488555	evm.model.000475F_PILON.26	XP_021345167.1	homeobox_protein_mab-5-like__[Mizuhopecten_yessoensis]	sp|P09087|ABDB_DROME	Homeobox_protein_abdominal-B_OS=Drosophila_melanogaster_OX=7227_GN=Abd-B_PE=1_SV=3	crg:105323257	K09300_homeobox_protein_abdominal-B_and_related_proteins_|_(RefSeq)_homeobox_protein_abdominal-B_(A)	NO
HiC_scaffold_2	34694847	intergenic_region	NA	34469886	34488555	evm.model.000475F_PILON.26	XP_021345167.1	homeobox_protein_mab-5-like__[Mizuhopecten_yessoensis]	sp|P09087|ABDB_DROME	Homeobox_protein_abdominal-B_OS=Drosophila_melanogaster_OX=7227_GN=Abd-B_PE=1_SV=3	crg:105323257	K09300_homeobox_protein_abdominal-B_and_related_proteins_|_(RefSeq)_homeobox_protein_abdominal-B_(A)	NO
HiC_scaffold_2	34694802	intergenic_region	NA	34469886	34488555	evm.model.000475F_PILON.26	XP_021345167.1	homeobox_protein_mab-5-like__[Mizuhopecten_yessoensis]	sp|P09087|ABDB_DROME	Homeobox_protein_abdominal-B_OS=Drosophila_melanogaster_OX=7227_GN=Abd-B_PE=1_SV=3	crg:105323257	K09300_homeobox_protein_abdominal-B_and_related_proteins_|_(RefSeq)_homeobox_protein_abdominal-B_(A)	NO
HiC_scaffold_2	34694800	intergenic_region	NA	34469886	34488555	evm.model.000475F_PILON.26	XP_021345167.1	homeobox_protein_mab-5-like__[Mizuhopecten_yessoensis]	sp|P09087|ABDB_DROME	Homeobox_protein_abdominal-B_OS=Drosophila_melanogaster_OX=7227_GN=Abd-B_PE=1_SV=3	crg:105323257	K09300_homeobox_protein_abdominal-B_and_related_proteins_|_(RefSeq)_homeobox_protein_abdominal-B_(A)	NO
HiC_scaffold_2	34712726	intergenic_region	NA	34469886	34488555	evm.model.000475F_PILON.26	XP_021345167.1	homeobox_protein_mab-5-like__[Mizuhopecten_yessoensis]	sp|P09087|ABDB_DROME	Homeobox_protein_abdominal-B_OS=Drosophila_melanogaster_OX=7227_GN=Abd-B_PE=1_SV=3	crg:105323257	K09300_homeobox_protein_abdominal-B_and_related_proteins_|_(RefSeq)_homeobox_protein_abdominal-B_(A)	NO
HiC_scaffold_2	34712980	intergenic_region	NA	34469886	34488555	evm.model.000475F_PILON.26	XP_021345167.1	homeobox_protein_mab-5-like__[Mizuhopecten_yessoensis]	sp|P09087|ABDB_DROME	Homeobox_protein_abdominal-B_OS=Drosophila_melanogaster_OX=7227_GN=Abd-B_PE=1_SV=3	crg:105323257	K09300_homeobox_protein_abdominal-B_and_related_proteins_|_(RefSeq)_homeobox_protein_abdominal-B_(A)	NO
HiC_scaffold_2	34725952	intergenic_region	NA	34469886	34488555	evm.model.000475F_PILON.26	XP_021345167.1	homeobox_protein_mab-5-like__[Mizuhopecten_yessoensis]	sp|P09087|ABDB_DROME	Homeobox_protein_abdominal-B_OS=Drosophila_melanogaster_OX=7227_GN=Abd-B_PE=1_SV=3	crg:105323257	K09300_homeobox_protein_abdominal-B_and_related_proteins_|_(RefSeq)_homeobox_protein_abdominal-B_(A)	NO
HiC_scaffold_2	34725959	intergenic_region	NA	34469886	34488555	evm.model.000475F_PILON.26	XP_021345167.1	homeobox_protein_mab-5-like__[Mizuhopecten_yessoensis]	sp|P09087|ABDB_DROME	Homeobox_protein_abdominal-B_OS=Drosophila_melanogaster_OX=7227_GN=Abd-B_PE=1_SV=3	crg:105323257	K09300_homeobox_protein_abdominal-B_and_related_proteins_|_(RefSeq)_homeobox_protein_abdominal-B_(A)	NO
HiC_scaffold_2	34748981	intergenic_region	NA	34469886	34488555	evm.model.000475F_PILON.26	XP_021345167.1	homeobox_protein_mab-5-like__[Mizuhopecten_yessoensis]	sp|P09087|ABDB_DROME	Homeobox_protein_abdominal-B_OS=Drosophila_melanogaster_OX=7227_GN=Abd-B_PE=1_SV=3	crg:105323257	K09300_homeobox_protein_abdominal-B_and_related_proteins_|_(RefSeq)_homeobox_protein_abdominal-B_(A)	NO
HiC_scaffold_2	34796629	intergenic_region	NA	34469886	34488555	evm.model.000475F_PILON.26	XP_021345167.1	homeobox_protein_mab-5-like__[Mizuhopecten_yessoensis]	sp|P09087|ABDB_DROME	Homeobox_protein_abdominal-B_OS=Drosophila_melanogaster_OX=7227_GN=Abd-B_PE=1_SV=3	crg:105323257	K09300_homeobox_protein_abdominal-B_and_related_proteins_|_(RefSeq)_homeobox_protein_abdominal-B_(A)	NO
HiC_scaffold_2	34796557	intergenic_region	NA	34469886	34488555	evm.model.000475F_PILON.26	XP_021345167.1	homeobox_protein_mab-5-like__[Mizuhopecten_yessoensis]	sp|P09087|ABDB_DROME	Homeobox_protein_abdominal-B_OS=Drosophila_melanogaster_OX=7227_GN=Abd-B_PE=1_SV=3	crg:105323257	K09300_homeobox_protein_abdominal-B_and_related_proteins_|_(RefSeq)_homeobox_protein_abdominal-B_(A)	NO
HiC_scaffold_2	34821444	intergenic_region	NA	34469886	34488555	evm.model.000475F_PILON.26	XP_021345167.1	homeobox_protein_mab-5-like__[Mizuhopecten_yessoensis]	sp|P09087|ABDB_DROME	Homeobox_protein_abdominal-B_OS=Drosophila_melanogaster_OX=7227_GN=Abd-B_PE=1_SV=3	crg:105323257	K09300_homeobox_protein_abdominal-B_and_related_proteins_|_(RefSeq)_homeobox_protein_abdominal-B_(A)	NO
HiC_scaffold_2	34841704	intergenic_region	NA	34469886	34488555	evm.model.000475F_PILON.26	XP_021345167.1	homeobox_protein_mab-5-like__[Mizuhopecten_yessoensis]	sp|P09087|ABDB_DROME	Homeobox_protein_abdominal-B_OS=Drosophila_melanogaster_OX=7227_GN=Abd-B_PE=1_SV=3	crg:105323257	K09300_homeobox_protein_abdominal-B_and_related_proteins_|_(RefSeq)_homeobox_protein_abdominal-B_(A)	NO
HiC_scaffold_2	34841698	intergenic_region	NA	34469886	34488555	evm.model.000475F_PILON.26	XP_021345167.1	homeobox_protein_mab-5-like__[Mizuhopecten_yessoensis]	sp|P09087|ABDB_DROME	Homeobox_protein_abdominal-B_OS=Drosophila_melanogaster_OX=7227_GN=Abd-B_PE=1_SV=3	crg:105323257	K09300_homeobox_protein_abdominal-B_and_related_proteins_|_(RefSeq)_homeobox_protein_abdominal-B_(A)	NO
HiC_scaffold_2	34841697	intergenic_region	NA	34469886	34488555	evm.model.000475F_PILON.26	XP_021345167.1	homeobox_protein_mab-5-like__[Mizuhopecten_yessoensis]	sp|P09087|ABDB_DROME	Homeobox_protein_abdominal-B_OS=Drosophila_melanogaster_OX=7227_GN=Abd-B_PE=1_SV=3	crg:105323257	K09300_homeobox_protein_abdominal-B_and_related_proteins_|_(RefSeq)_homeobox_protein_abdominal-B_(A)	NO
HiC_scaffold_2	34841693	intergenic_region	NA	34469886	34488555	evm.model.000475F_PILON.26	XP_021345167.1	homeobox_protein_mab-5-like__[Mizuhopecten_yessoensis]	sp|P09087|ABDB_DROME	Homeobox_protein_abdominal-B_OS=Drosophila_melanogaster_OX=7227_GN=Abd-B_PE=1_SV=3	crg:105323257	K09300_homeobox_protein_abdominal-B_and_related_proteins_|_(RefSeq)_homeobox_protein_abdominal-B_(A)	NO
HiC_scaffold_2	34870878	intergenic_region	NA	34469886	34488555	evm.model.000475F_PILON.26	XP_021345167.1	homeobox_protein_mab-5-like__[Mizuhopecten_yessoensis]	sp|P09087|ABDB_DROME	Homeobox_protein_abdominal-B_OS=Drosophila_melanogaster_OX=7227_GN=Abd-B_PE=1_SV=3	crg:105323257	K09300_homeobox_protein_abdominal-B_and_related_proteins_|_(RefSeq)_homeobox_protein_abdominal-B_(A)	NO
HiC_scaffold_2	34870833	intergenic_region	NA	34469886	34488555	evm.model.000475F_PILON.26	XP_021345167.1	homeobox_protein_mab-5-like__[Mizuhopecten_yessoensis]	sp|P09087|ABDB_DROME	Homeobox_protein_abdominal-B_OS=Drosophila_melanogaster_OX=7227_GN=Abd-B_PE=1_SV=3	crg:105323257	K09300_homeobox_protein_abdominal-B_and_related_proteins_|_(RefSeq)_homeobox_protein_abdominal-B_(A)	NO
HiC_scaffold_2	34898922	intergenic_region	NA	34469886	34488555	evm.model.000475F_PILON.26	XP_021345167.1	homeobox_protein_mab-5-like__[Mizuhopecten_yessoensis]	sp|P09087|ABDB_DROME	Homeobox_protein_abdominal-B_OS=Drosophila_melanogaster_OX=7227_GN=Abd-B_PE=1_SV=3	crg:105323257	K09300_homeobox_protein_abdominal-B_and_related_proteins_|_(RefSeq)_homeobox_protein_abdominal-B_(A)	NO
HiC_scaffold_2	34899479	intergenic_region	NA	34469886	34488555	evm.model.000475F_PILON.26	XP_021345167.1	homeobox_protein_mab-5-like__[Mizuhopecten_yessoensis]	sp|P09087|ABDB_DROME	Homeobox_protein_abdominal-B_OS=Drosophila_melanogaster_OX=7227_GN=Abd-B_PE=1_SV=3	crg:105323257	K09300_homeobox_protein_abdominal-B_and_related_proteins_|_(RefSeq)_homeobox_protein_abdominal-B_(A)	NO
HiC_scaffold_2	34899497	intergenic_region	NA	34469886	34488555	evm.model.000475F_PILON.26	XP_021345167.1	homeobox_protein_mab-5-like__[Mizuhopecten_yessoensis]	sp|P09087|ABDB_DROME	Homeobox_protein_abdominal-B_OS=Drosophila_melanogaster_OX=7227_GN=Abd-B_PE=1_SV=3	crg:105323257	K09300_homeobox_protein_abdominal-B_and_related_proteins_|_(RefSeq)_homeobox_protein_abdominal-B_(A)	NO
HiC_scaffold_2	34899498	intergenic_region	NA	34469886	34488555	evm.model.000475F_PILON.26	XP_021345167.1	homeobox_protein_mab-5-like__[Mizuhopecten_yessoensis]	sp|P09087|ABDB_DROME	Homeobox_protein_abdominal-B_OS=Drosophila_melanogaster_OX=7227_GN=Abd-B_PE=1_SV=3	crg:105323257	K09300_homeobox_protein_abdominal-B_and_related_proteins_|_(RefSeq)_homeobox_protein_abdominal-B_(A)	NO
HiC_scaffold_2	35208552	intron_variant	NA	35186468	35239580	evm.model.000199F_PILON.47	XP_021345129.1	NGFI-A-binding_protein_1-like_isoform_X2__[Mizuhopecten_yessoensis]	sp|Q15742|NAB2_HUMAN	NGFI-A-binding_protein_2_OS=Homo_sapiens_OX=9606_GN=NAB2_PE=1_SV=1	myi:110445072	K22388_NGFI-A-binding_protein_|_(RefSeq)_NGFI-A-binding_protein_1-like_isoform_X1_(A)	YES
HiC_scaffold_2	35265046	intron_variant	NA	35245308	35309293	evm.model.000199F_PILON.46	XP_021345149.1	molybdenum_cofactor_sulfurase-like__[Mizuhopecten_yessoensis]	sp|Q96EN8|MOCOS_HUMAN	Molybdenum_cofactor_sulfurase_OS=Homo_sapiens_OX=9606_GN=MOCOS_PE=1_SV=2	myi:110445086	K15631_molybdenum_cofactor_sulfurtransferase_[EC:2.8.1.9]_|_(RefSeq)_molybdenum_cofactor_sulfurase-like_(A)	YES
HiC_scaffold_2	35265048	intron_variant	NA	35245308	35309293	evm.model.000199F_PILON.46	XP_021345149.1	molybdenum_cofactor_sulfurase-like__[Mizuhopecten_yessoensis]	sp|Q96EN8|MOCOS_HUMAN	Molybdenum_cofactor_sulfurase_OS=Homo_sapiens_OX=9606_GN=MOCOS_PE=1_SV=2	myi:110445086	K15631_molybdenum_cofactor_sulfurtransferase_[EC:2.8.1.9]_|_(RefSeq)_molybdenum_cofactor_sulfurase-like_(A)	YES
HiC_scaffold_2	35264986	intron_variant	NA	35245308	35309293	evm.model.000199F_PILON.46	XP_021345149.1	molybdenum_cofactor_sulfurase-like__[Mizuhopecten_yessoensis]	sp|Q96EN8|MOCOS_HUMAN	Molybdenum_cofactor_sulfurase_OS=Homo_sapiens_OX=9606_GN=MOCOS_PE=1_SV=2	myi:110445086	K15631_molybdenum_cofactor_sulfurtransferase_[EC:2.8.1.9]_|_(RefSeq)_molybdenum_cofactor_sulfurase-like_(A)	YES
HiC_scaffold_2	35282490	intron_variant	NA	35245308	35309293	evm.model.000199F_PILON.46	XP_021345149.1	molybdenum_cofactor_sulfurase-like__[Mizuhopecten_yessoensis]	sp|Q96EN8|MOCOS_HUMAN	Molybdenum_cofactor_sulfurase_OS=Homo_sapiens_OX=9606_GN=MOCOS_PE=1_SV=2	myi:110445086	K15631_molybdenum_cofactor_sulfurtransferase_[EC:2.8.1.9]_|_(RefSeq)_molybdenum_cofactor_sulfurase-like_(A)	YES
HiC_scaffold_2	35298292	synonymous_variant	LOW	35245308	35309293	evm.model.000199F_PILON.46	XP_021345149.1	molybdenum_cofactor_sulfurase-like__[Mizuhopecten_yessoensis]	sp|Q96EN8|MOCOS_HUMAN	Molybdenum_cofactor_sulfurase_OS=Homo_sapiens_OX=9606_GN=MOCOS_PE=1_SV=2	myi:110445086	K15631_molybdenum_cofactor_sulfurtransferase_[EC:2.8.1.9]_|_(RefSeq)_molybdenum_cofactor_sulfurase-like_(A)	YES
HiC_scaffold_2	35406343	intron_variant	NA	35389660	35410734	evm.model.000199F_PILON.43	XP_022292235.1	mucin-2-like_isoform_X3__[Crassostrea_virginica]	sp|Q8MTI2|BSL1_TRIVA	Putative_surface_protein_bspA-like_OS=Trichomonas_vaginalis_OX=5722_GN=BSPAL1_PE=4_SV=1	bta:789503	K13908_mucin-5B_|_(RefSeq)_mucin-5B_(A)	YES
HiC_scaffold_2	35406342	intron_variant	NA	35389660	35410734	evm.model.000199F_PILON.43	XP_022292235.1	mucin-2-like_isoform_X3__[Crassostrea_virginica]	sp|Q8MTI2|BSL1_TRIVA	Putative_surface_protein_bspA-like_OS=Trichomonas_vaginalis_OX=5722_GN=BSPAL1_PE=4_SV=1	bta:789503	K13908_mucin-5B_|_(RefSeq)_mucin-5B_(A)	YES
HiC_scaffold_2	35410915	upstream_gene_variant	NA	35389660	35410734	evm.model.000199F_PILON.43	XP_022292235.1	mucin-2-like_isoform_X3__[Crassostrea_virginica]	sp|Q8MTI2|BSL1_TRIVA	Putative_surface_protein_bspA-like_OS=Trichomonas_vaginalis_OX=5722_GN=BSPAL1_PE=4_SV=1	bta:789503	K13908_mucin-5B_|_(RefSeq)_mucin-5B_(A)	NO
HiC_scaffold_2	35410939	upstream_gene_variant	NA	35389660	35410734	evm.model.000199F_PILON.43	XP_022292235.1	mucin-2-like_isoform_X3__[Crassostrea_virginica]	sp|Q8MTI2|BSL1_TRIVA	Putative_surface_protein_bspA-like_OS=Trichomonas_vaginalis_OX=5722_GN=BSPAL1_PE=4_SV=1	bta:789503	K13908_mucin-5B_|_(RefSeq)_mucin-5B_(A)	NO
HiC_scaffold_2	35443263	intergenic_region	NA	35419536	35421829	evm.model.000199F_PILON.42	XP_013998920.1	PREDICTED:_hornerin-like__[Salmo_salar]	NA	NA	kmr:108234727	K08451_adhesion_G-protein_coupled_receptor_G2_|_(RefSeq)_adgrg2;_adhesion_G-protein_coupled_receptor_G2_isoform_X1_(A)	NO
HiC_scaffold_2	35444243	intergenic_region	NA	35419536	35421829	evm.model.000199F_PILON.42	XP_013998920.1	PREDICTED:_hornerin-like__[Salmo_salar]	NA	NA	kmr:108234727	K08451_adhesion_G-protein_coupled_receptor_G2_|_(RefSeq)_adgrg2;_adhesion_G-protein_coupled_receptor_G2_isoform_X1_(A)	NO
HiC_scaffold_2	35477401	intergenic_region	NA	35419536	35421829	evm.model.000199F_PILON.42	XP_013998920.1	PREDICTED:_hornerin-like__[Salmo_salar]	NA	NA	kmr:108234727	K08451_adhesion_G-protein_coupled_receptor_G2_|_(RefSeq)_adgrg2;_adhesion_G-protein_coupled_receptor_G2_isoform_X1_(A)	NO
HiC_scaffold_2	35477394	intergenic_region	NA	35419536	35421829	evm.model.000199F_PILON.42	XP_013998920.1	PREDICTED:_hornerin-like__[Salmo_salar]	NA	NA	kmr:108234727	K08451_adhesion_G-protein_coupled_receptor_G2_|_(RefSeq)_adgrg2;_adhesion_G-protein_coupled_receptor_G2_isoform_X1_(A)	NO
HiC_scaffold_2	35477393	intergenic_region	NA	35419536	35421829	evm.model.000199F_PILON.42	XP_013998920.1	PREDICTED:_hornerin-like__[Salmo_salar]	NA	NA	kmr:108234727	K08451_adhesion_G-protein_coupled_receptor_G2_|_(RefSeq)_adgrg2;_adhesion_G-protein_coupled_receptor_G2_isoform_X1_(A)	NO
HiC_scaffold_2	35501878	intergenic_region	NA	35419536	35421829	evm.model.000199F_PILON.42	XP_013998920.1	PREDICTED:_hornerin-like__[Salmo_salar]	NA	NA	kmr:108234727	K08451_adhesion_G-protein_coupled_receptor_G2_|_(RefSeq)_adgrg2;_adhesion_G-protein_coupled_receptor_G2_isoform_X1_(A)	NO
HiC_scaffold_2	35535211	upstream_gene_variant	NA	35419536	35421829	evm.model.000199F_PILON.42	XP_013998920.1	PREDICTED:_hornerin-like__[Salmo_salar]	NA	NA	kmr:108234727	K08451_adhesion_G-protein_coupled_receptor_G2_|_(RefSeq)_adgrg2;_adhesion_G-protein_coupled_receptor_G2_isoform_X1_(A)	NO
HiC_scaffold_2	35552404	intron_variant	NA	35539352	35583048	evm.model.000199F_PILON.39.5	XP_021345116.1	poly(rC)-binding_protein_3-like_isoform_X8__[Mizuhopecten_yessoensis]	sp|P57721|PCBP3_HUMAN	Poly(rC)-binding_protein_3_OS=Homo_sapiens_OX=9606_GN=PCBP3_PE=2_SV=2	myi:110445068	K21444_poly(rC)-binding_protein_3/4_|_(RefSeq)_poly(rC)-binding_protein_3-like_isoform_X1_(A)	YES
HiC_scaffold_2	35552429	intron_variant	NA	35539352	35583048	evm.model.000199F_PILON.39.5	XP_021345116.1	poly(rC)-binding_protein_3-like_isoform_X8__[Mizuhopecten_yessoensis]	sp|P57721|PCBP3_HUMAN	Poly(rC)-binding_protein_3_OS=Homo_sapiens_OX=9606_GN=PCBP3_PE=2_SV=2	myi:110445068	K21444_poly(rC)-binding_protein_3/4_|_(RefSeq)_poly(rC)-binding_protein_3-like_isoform_X1_(A)	YES
HiC_scaffold_2	35560103	synonymous_variant	LOW	35539352	35583048	evm.model.000199F_PILON.39.5	XP_021345116.1	poly(rC)-binding_protein_3-like_isoform_X8__[Mizuhopecten_yessoensis]	sp|P57721|PCBP3_HUMAN	Poly(rC)-binding_protein_3_OS=Homo_sapiens_OX=9606_GN=PCBP3_PE=2_SV=2	myi:110445068	K21444_poly(rC)-binding_protein_3/4_|_(RefSeq)_poly(rC)-binding_protein_3-like_isoform_X1_(A)	YES
HiC_scaffold_2	35749840	intron_variant	NA	35746290	35781886	evm.model.000199F_PILON.28	XP_021349667.1	extended_synaptotagmin-2-like_isoform_X6__[Mizuhopecten_yessoensis]	sp|A0FGR8|ESYT2_HUMAN	Extended_synaptotagmin-2_OS=Homo_sapiens_OX=9606_GN=ESYT2_PE=1_SV=1	tsp:Tsp_01622	K19513_protein_CLEC16A_|_(RefSeq)_putative_C2_domain_protein_(A)	YES
HiC_scaffold_2	35762256	intron_variant	NA	35746290	35781886	evm.model.000199F_PILON.28	XP_021349667.1	extended_synaptotagmin-2-like_isoform_X6__[Mizuhopecten_yessoensis]	sp|A0FGR8|ESYT2_HUMAN	Extended_synaptotagmin-2_OS=Homo_sapiens_OX=9606_GN=ESYT2_PE=1_SV=1	tsp:Tsp_01622	K19513_protein_CLEC16A_|_(RefSeq)_putative_C2_domain_protein_(A)	YES
HiC_scaffold_2	35777801	intron_variant	NA	35746290	35781886	evm.model.000199F_PILON.28	XP_021349667.1	extended_synaptotagmin-2-like_isoform_X6__[Mizuhopecten_yessoensis]	sp|A0FGR8|ESYT2_HUMAN	Extended_synaptotagmin-2_OS=Homo_sapiens_OX=9606_GN=ESYT2_PE=1_SV=1	tsp:Tsp_01622	K19513_protein_CLEC16A_|_(RefSeq)_putative_C2_domain_protein_(A)	YES
HiC_scaffold_2	35782855	upstream_gene_variant	NA	35746290	35781886	evm.model.000199F_PILON.28	XP_021349667.1	extended_synaptotagmin-2-like_isoform_X6__[Mizuhopecten_yessoensis]	sp|A0FGR8|ESYT2_HUMAN	Extended_synaptotagmin-2_OS=Homo_sapiens_OX=9606_GN=ESYT2_PE=1_SV=1	tsp:Tsp_01622	K19513_protein_CLEC16A_|_(RefSeq)_putative_C2_domain_protein_(A)	NO
HiC_scaffold_2	35782859	upstream_gene_variant	NA	35746290	35781886	evm.model.000199F_PILON.28	XP_021349667.1	extended_synaptotagmin-2-like_isoform_X6__[Mizuhopecten_yessoensis]	sp|A0FGR8|ESYT2_HUMAN	Extended_synaptotagmin-2_OS=Homo_sapiens_OX=9606_GN=ESYT2_PE=1_SV=1	tsp:Tsp_01622	K19513_protein_CLEC16A_|_(RefSeq)_putative_C2_domain_protein_(A)	NO
HiC_scaffold_2	35942924	intron_variant	NA	35917530	35950985	evm.model.000199F_PILON.21	XP_021371468.1	argininosuccinate_synthase-like__[Mizuhopecten_yessoensis]	sp|Q66I24|ASSY_DANRE	Argininosuccinate_synthase_OS=Danio_rerio_OX=7955_GN=ass1_PE=2_SV=1	myi:110462019	K01940_argininosuccinate_synthase_[EC:6.3.4.5]_|_(RefSeq)_argininosuccinate_synthase-like_(A)	YES
HiC_scaffold_2	35942881	intron_variant	NA	35917530	35950985	evm.model.000199F_PILON.21	XP_021371468.1	argininosuccinate_synthase-like__[Mizuhopecten_yessoensis]	sp|Q66I24|ASSY_DANRE	Argininosuccinate_synthase_OS=Danio_rerio_OX=7955_GN=ass1_PE=2_SV=1	myi:110462019	K01940_argininosuccinate_synthase_[EC:6.3.4.5]_|_(RefSeq)_argininosuccinate_synthase-like_(A)	YES
HiC_scaffold_2	35942864	intron_variant	NA	35917530	35950985	evm.model.000199F_PILON.21	XP_021371468.1	argininosuccinate_synthase-like__[Mizuhopecten_yessoensis]	sp|Q66I24|ASSY_DANRE	Argininosuccinate_synthase_OS=Danio_rerio_OX=7955_GN=ass1_PE=2_SV=1	myi:110462019	K01940_argininosuccinate_synthase_[EC:6.3.4.5]_|_(RefSeq)_argininosuccinate_synthase-like_(A)	YES
HiC_scaffold_2	35972904	upstream_gene_variant	NA	35956431	35969529	evm.model.000199F_PILON.20	XP_021371175.1	tRNA_2'-phosphotransferase_1-like__[Mizuhopecten_yessoensis]	sp|Q8K3A2|TRPT1_MOUSE	tRNA_2'-phosphotransferase_1_OS=Mus_musculus_OX=10090_GN=Trpt1_PE=2_SV=2	myi:110461815	K10669_2'-phosphotransferase_[EC:2.7.1.160]_|_(RefSeq)_tRNA_2'-phosphotransferase_1-like_(A)	NO
HiC_scaffold_2	35972902	upstream_gene_variant	NA	35956431	35969529	evm.model.000199F_PILON.20	XP_021371175.1	tRNA_2'-phosphotransferase_1-like__[Mizuhopecten_yessoensis]	sp|Q8K3A2|TRPT1_MOUSE	tRNA_2'-phosphotransferase_1_OS=Mus_musculus_OX=10090_GN=Trpt1_PE=2_SV=2	myi:110461815	K10669_2'-phosphotransferase_[EC:2.7.1.160]_|_(RefSeq)_tRNA_2'-phosphotransferase_1-like_(A)	NO
HiC_scaffold_2	35972900	upstream_gene_variant	NA	35956431	35969529	evm.model.000199F_PILON.20	XP_021371175.1	tRNA_2'-phosphotransferase_1-like__[Mizuhopecten_yessoensis]	sp|Q8K3A2|TRPT1_MOUSE	tRNA_2'-phosphotransferase_1_OS=Mus_musculus_OX=10090_GN=Trpt1_PE=2_SV=2	myi:110461815	K10669_2'-phosphotransferase_[EC:2.7.1.160]_|_(RefSeq)_tRNA_2'-phosphotransferase_1-like_(A)	NO
HiC_scaffold_2	35972899	upstream_gene_variant	NA	35956431	35969529	evm.model.000199F_PILON.20	XP_021371175.1	tRNA_2'-phosphotransferase_1-like__[Mizuhopecten_yessoensis]	sp|Q8K3A2|TRPT1_MOUSE	tRNA_2'-phosphotransferase_1_OS=Mus_musculus_OX=10090_GN=Trpt1_PE=2_SV=2	myi:110461815	K10669_2'-phosphotransferase_[EC:2.7.1.160]_|_(RefSeq)_tRNA_2'-phosphotransferase_1-like_(A)	NO
HiC_scaffold_2	36352228	downstream_gene_variant	NA	36333177	36351946	evm.model.000199F_PILON.12	XP_021371150.1	LIM_homeobox_transcription_factor_1-alpha-like__[Mizuhopecten_yessoensis]	sp|O88609|LMX1B_MOUSE	LIM_homeobox_transcription_factor_1-beta_OS=Mus_musculus_OX=10090_GN=Lmx1b_PE=1_SV=3	myi:110461805	K09371_LIM_homeobox_transcription_factor_1_|_(RefSeq)_LIM_homeobox_transcription_factor_1-alpha-like_(A)	NO
HiC_scaffold_2	36353632	downstream_gene_variant	NA	36333177	36351946	evm.model.000199F_PILON.12	XP_021371150.1	LIM_homeobox_transcription_factor_1-alpha-like__[Mizuhopecten_yessoensis]	sp|O88609|LMX1B_MOUSE	LIM_homeobox_transcription_factor_1-beta_OS=Mus_musculus_OX=10090_GN=Lmx1b_PE=1_SV=3	myi:110461805	K09371_LIM_homeobox_transcription_factor_1_|_(RefSeq)_LIM_homeobox_transcription_factor_1-alpha-like_(A)	NO
HiC_scaffold_2	36383052	synonymous_variant	LOW	36380281	36458678	evm.model.000199F_PILON.7	OWF41899.1	E3_ubiquitin-protein_ligase_UBR4__[Mizuhopecten_yessoensis]	sp|Q5T4S7|UBR4_HUMAN	E3_ubiquitin-protein_ligase_UBR4_OS=Homo_sapiens_OX=9606_GN=UBR4_PE=1_SV=1	myi:110461808	K10691_E3_ubiquitin-protein_ligase_UBR4_[EC:2.3.2.27]_|_(RefSeq)_E3_ubiquitin-protein_ligase_UBR4-like_isoform_X1_(A)	YES
HiC_scaffold_2	36383037	synonymous_variant	LOW	36380281	36458678	evm.model.000199F_PILON.7	OWF41899.1	E3_ubiquitin-protein_ligase_UBR4__[Mizuhopecten_yessoensis]	sp|Q5T4S7|UBR4_HUMAN	E3_ubiquitin-protein_ligase_UBR4_OS=Homo_sapiens_OX=9606_GN=UBR4_PE=1_SV=1	myi:110461808	K10691_E3_ubiquitin-protein_ligase_UBR4_[EC:2.3.2.27]_|_(RefSeq)_E3_ubiquitin-protein_ligase_UBR4-like_isoform_X1_(A)	YES
HiC_scaffold_2	36383013	synonymous_variant	LOW	36380281	36458678	evm.model.000199F_PILON.7	OWF41899.1	E3_ubiquitin-protein_ligase_UBR4__[Mizuhopecten_yessoensis]	sp|Q5T4S7|UBR4_HUMAN	E3_ubiquitin-protein_ligase_UBR4_OS=Homo_sapiens_OX=9606_GN=UBR4_PE=1_SV=1	myi:110461808	K10691_E3_ubiquitin-protein_ligase_UBR4_[EC:2.3.2.27]_|_(RefSeq)_E3_ubiquitin-protein_ligase_UBR4-like_isoform_X1_(A)	YES
HiC_scaffold_2	36903235	upstream_gene_variant	NA	36895839	36900628	evm.model.000209F_PILON.55	XP_021340823.1	uncharacterized_protein_LOC110441867__[Mizuhopecten_yessoensis]	NA	NA	sko:100368911	K23092_putative_nucleotidyltransferase_[EC:2.7.7.-]_|_(RefSeq)_cyclic_GMP-AMP_synthase-like_(A)	NO
HiC_scaffold_2	36924101	synonymous_variant	LOW	36921244	36925456	evm.model.000209F_PILON.52	XP_021340822.1	von_Hippel-Lindau_disease_tumor_suppressor-like__[Mizuhopecten_yessoensis]	sp|Q64259|VHL_RAT	von_Hippel-Lindau_disease_tumor_suppressor_OS=Rattus_norvegicus_OX=10116_GN=Vhl_PE=1_SV=1	myi:110441865	K03871_von_Hippel-Lindau_disease_tumor_supressor_|_(RefSeq)_von_Hippel-Lindau_disease_tumor_suppressor-like_(A)	YES
HiC_scaffold_2	36971830	downstream_gene_variant	NA	36962816	36968005	evm.model.000209F_PILON.50	ROT70521.1	putative_mucin-1-like__[Penaeus_vannamei]	sp|Q6UWP8|SBSN_HUMAN	Suprabasin_OS=Homo_sapiens_OX=9606_GN=SBSN_PE=1_SV=2	bacu:103020181	K13908_mucin-5B_|_(RefSeq)_MUC5B;_mucin_5B,_oligomeric_mucus/gel-forming_(A)	NO
HiC_scaffold_2	36971841	downstream_gene_variant	NA	36962816	36968005	evm.model.000209F_PILON.50	ROT70521.1	putative_mucin-1-like__[Penaeus_vannamei]	sp|Q6UWP8|SBSN_HUMAN	Suprabasin_OS=Homo_sapiens_OX=9606_GN=SBSN_PE=1_SV=2	bacu:103020181	K13908_mucin-5B_|_(RefSeq)_MUC5B;_mucin_5B,_oligomeric_mucus/gel-forming_(A)	NO
HiC_scaffold_2	36971809	downstream_gene_variant	NA	36962816	36968005	evm.model.000209F_PILON.50	ROT70521.1	putative_mucin-1-like__[Penaeus_vannamei]	sp|Q6UWP8|SBSN_HUMAN	Suprabasin_OS=Homo_sapiens_OX=9606_GN=SBSN_PE=1_SV=2	bacu:103020181	K13908_mucin-5B_|_(RefSeq)_MUC5B;_mucin_5B,_oligomeric_mucus/gel-forming_(A)	NO
HiC_scaffold_2	36971786	downstream_gene_variant	NA	36962816	36968005	evm.model.000209F_PILON.50	ROT70521.1	putative_mucin-1-like__[Penaeus_vannamei]	sp|Q6UWP8|SBSN_HUMAN	Suprabasin_OS=Homo_sapiens_OX=9606_GN=SBSN_PE=1_SV=2	bacu:103020181	K13908_mucin-5B_|_(RefSeq)_MUC5B;_mucin_5B,_oligomeric_mucus/gel-forming_(A)	NO
HiC_scaffold_2	36971784	downstream_gene_variant	NA	36962816	36968005	evm.model.000209F_PILON.50	ROT70521.1	putative_mucin-1-like__[Penaeus_vannamei]	sp|Q6UWP8|SBSN_HUMAN	Suprabasin_OS=Homo_sapiens_OX=9606_GN=SBSN_PE=1_SV=2	bacu:103020181	K13908_mucin-5B_|_(RefSeq)_MUC5B;_mucin_5B,_oligomeric_mucus/gel-forming_(A)	NO
HiC_scaffold_2	36996170	intron_variant	NA	36990050	37012720	evm.model.000209F_PILON.47	XP_021351436.1	sushi,_von_Willebrand_factor_type_A,_EGF_and_pentraxin_domain-containing_protein_1-like__[Mizuhopecten_yessoensis]	sp|Q5EA25|SRPX2_BOVIN	Sushi_repeat-containing_protein_SRPX2_OS=Bos_taurus_OX=9913_GN=SRPX2_PE=2_SV=1	myi:110449123	K17495_CUB_and_sushi_domain-containing_protein_|_(RefSeq)_sushi,_von_Willebrand_factor_type_A,_EGF_and_pentraxin_domain-containing_protein_1-like_(A)	YES
HiC_scaffold_2	37316109	missense_variant	MODERATE	37309060	37316789	evm.model.000209F_PILON.29	XP_021341601.1	long-chain_fatty_acid_transport_protein_1-like__[Mizuhopecten_yessoensis]	sp|Q60714|S27A1_MOUSE	Long-chain_fatty_acid_transport_protein_1_OS=Mus_musculus_OX=10090_GN=Slc27a1_PE=1_SV=1	myi:110442359	K08745_solute_carrier_family_27_(fatty_acid_transporter),_member_1/4_[EC:6.2.1.-]_|_(RefSeq)_long-chain_fatty_acid_transport_protein_1-like_(A)	YES
HiC_scaffold_2	37339160	intron_variant	NA	37334212	37340517	evm.model.000209F_PILON.28	XP_021341590.1	E3_ubiquitin-protein_ligase_RNF165-like__[Mizuhopecten_yessoensis]	sp|Q7L0R7|RNF44_HUMAN	RING_finger_protein_44_OS=Homo_sapiens_OX=9606_GN=RNF44_PE=2_SV=1	crg:105319216	K19041_E3_ubiquitin-protein_ligase_RNF38/44_[EC:2.3.2.27]_|_(RefSeq)_uncharacterized_protein_LOC105319216_(A)	YES
HiC_scaffold_2	37339138	intron_variant	NA	37334212	37340517	evm.model.000209F_PILON.28	XP_021341590.1	E3_ubiquitin-protein_ligase_RNF165-like__[Mizuhopecten_yessoensis]	sp|Q7L0R7|RNF44_HUMAN	RING_finger_protein_44_OS=Homo_sapiens_OX=9606_GN=RNF44_PE=2_SV=1	crg:105319216	K19041_E3_ubiquitin-protein_ligase_RNF38/44_[EC:2.3.2.27]_|_(RefSeq)_uncharacterized_protein_LOC105319216_(A)	YES
HiC_scaffold_2	37339120	intron_variant	NA	37334212	37340517	evm.model.000209F_PILON.28	XP_021341590.1	E3_ubiquitin-protein_ligase_RNF165-like__[Mizuhopecten_yessoensis]	sp|Q7L0R7|RNF44_HUMAN	RING_finger_protein_44_OS=Homo_sapiens_OX=9606_GN=RNF44_PE=2_SV=1	crg:105319216	K19041_E3_ubiquitin-protein_ligase_RNF38/44_[EC:2.3.2.27]_|_(RefSeq)_uncharacterized_protein_LOC105319216_(A)	YES
HiC_scaffold_2	37374937	intergenic_region	NA	37364971	37368845	evm.model.000209F_PILON.26	XP_021341561.1	synaptotagmin-6-like_isoform_X2__[Mizuhopecten_yessoensis]	sp|Q5T7P8|SYT6_HUMAN	Synaptotagmin-6_OS=Homo_sapiens_OX=9606_GN=SYT6_PE=1_SV=3	myi:110442317	K19906_synaptotagmin-6_|_(RefSeq)_synaptotagmin-6-like_isoform_X1_(A)	NO
HiC_scaffold_2	37374942	intergenic_region	NA	37364971	37368845	evm.model.000209F_PILON.26	XP_021341561.1	synaptotagmin-6-like_isoform_X2__[Mizuhopecten_yessoensis]	sp|Q5T7P8|SYT6_HUMAN	Synaptotagmin-6_OS=Homo_sapiens_OX=9606_GN=SYT6_PE=1_SV=3	myi:110442317	K19906_synaptotagmin-6_|_(RefSeq)_synaptotagmin-6-like_isoform_X1_(A)	NO
HiC_scaffold_2	37401895	intergenic_region	NA	37364971	37368845	evm.model.000209F_PILON.26	XP_021341561.1	synaptotagmin-6-like_isoform_X2__[Mizuhopecten_yessoensis]	sp|Q5T7P8|SYT6_HUMAN	Synaptotagmin-6_OS=Homo_sapiens_OX=9606_GN=SYT6_PE=1_SV=3	myi:110442317	K19906_synaptotagmin-6_|_(RefSeq)_synaptotagmin-6-like_isoform_X1_(A)	NO
HiC_scaffold_2	37401871	intergenic_region	NA	37364971	37368845	evm.model.000209F_PILON.26	XP_021341561.1	synaptotagmin-6-like_isoform_X2__[Mizuhopecten_yessoensis]	sp|Q5T7P8|SYT6_HUMAN	Synaptotagmin-6_OS=Homo_sapiens_OX=9606_GN=SYT6_PE=1_SV=3	myi:110442317	K19906_synaptotagmin-6_|_(RefSeq)_synaptotagmin-6-like_isoform_X1_(A)	NO
HiC_scaffold_2	37421838	intergenic_region	NA	37364971	37368845	evm.model.000209F_PILON.26	XP_021341561.1	synaptotagmin-6-like_isoform_X2__[Mizuhopecten_yessoensis]	sp|Q5T7P8|SYT6_HUMAN	Synaptotagmin-6_OS=Homo_sapiens_OX=9606_GN=SYT6_PE=1_SV=3	myi:110442317	K19906_synaptotagmin-6_|_(RefSeq)_synaptotagmin-6-like_isoform_X1_(A)	NO
HiC_scaffold_2	37429834	intergenic_region	NA	37364971	37368845	evm.model.000209F_PILON.26	XP_021341561.1	synaptotagmin-6-like_isoform_X2__[Mizuhopecten_yessoensis]	sp|Q5T7P8|SYT6_HUMAN	Synaptotagmin-6_OS=Homo_sapiens_OX=9606_GN=SYT6_PE=1_SV=3	myi:110442317	K19906_synaptotagmin-6_|_(RefSeq)_synaptotagmin-6-like_isoform_X1_(A)	NO
HiC_scaffold_2	37436207	intergenic_region	NA	37364971	37368845	evm.model.000209F_PILON.26	XP_021341561.1	synaptotagmin-6-like_isoform_X2__[Mizuhopecten_yessoensis]	sp|Q5T7P8|SYT6_HUMAN	Synaptotagmin-6_OS=Homo_sapiens_OX=9606_GN=SYT6_PE=1_SV=3	myi:110442317	K19906_synaptotagmin-6_|_(RefSeq)_synaptotagmin-6-like_isoform_X1_(A)	NO
HiC_scaffold_2	37480086	intergenic_region	NA	37467693	37468545	evm.model.000209F_PILON.21	XP_014018986.1	PREDICTED:_extensin-like__[Salmo_salar]	NA	NA	amex:103034863	K05769_Rho_guanine_nucleotide_exchange_factor_4/29_|_(RefSeq)_uncharacterized_protein_LOC103034863_isoform_X1_(A)	NO
HiC_scaffold_2	37493245	downstream_gene_variant	NA	37467693	37468545	evm.model.000209F_PILON.21	XP_014018986.1	PREDICTED:_extensin-like__[Salmo_salar]	NA	NA	amex:103034863	K05769_Rho_guanine_nucleotide_exchange_factor_4/29_|_(RefSeq)_uncharacterized_protein_LOC103034863_isoform_X1_(A)	NO
HiC_scaffold_2	37493202	downstream_gene_variant	NA	37467693	37468545	evm.model.000209F_PILON.21	XP_014018986.1	PREDICTED:_extensin-like__[Salmo_salar]	NA	NA	amex:103034863	K05769_Rho_guanine_nucleotide_exchange_factor_4/29_|_(RefSeq)_uncharacterized_protein_LOC103034863_isoform_X1_(A)	NO
HiC_scaffold_2	38904468	intergenic_region	NA	38886782	38890866	evm.model.001214F_PILON.9	XP_021380287.1	uncharacterized_protein_LOC110467441__[Mizuhopecten_yessoensis]	NA	NA	sko:100367183	K17495_CUB_and_sushi_domain-containing_protein_|_(RefSeq)_CUB_and_sushi_domain-containing_protein_3-like_(A)	NO
HiC_scaffold_2	38909807	upstream_gene_variant	NA	38886782	38890866	evm.model.001214F_PILON.9	XP_021380287.1	uncharacterized_protein_LOC110467441__[Mizuhopecten_yessoensis]	NA	NA	sko:100367183	K17495_CUB_and_sushi_domain-containing_protein_|_(RefSeq)_CUB_and_sushi_domain-containing_protein_3-like_(A)	NO
HiC_scaffold_2	38930612	intergenic_region	NA	38911985	38919478	evm.model.001214F_PILON.10	OWF37419.1	hypothetical_protein_KP79_PYT04740__[Mizuhopecten_yessoensis]	NA	NA	NA	NA	NO
HiC_scaffold_2	38930609	intergenic_region	NA	38911985	38919478	evm.model.001214F_PILON.10	OWF37419.1	hypothetical_protein_KP79_PYT04740__[Mizuhopecten_yessoensis]	NA	NA	NA	NA	NO
HiC_scaffold_2	38955234	intron_variant	NA	38937422	38967622	evm.model.001214F_PILON.11	XP_021380332.1	uncharacterized_protein_LOC110467469__[Mizuhopecten_yessoensis]	NA	NA	NA	NA	YES
HiC_scaffold_2	38955178	intron_variant	NA	38937422	38967622	evm.model.001214F_PILON.11	XP_021380332.1	uncharacterized_protein_LOC110467469__[Mizuhopecten_yessoensis]	NA	NA	NA	NA	YES
HiC_scaffold_2	38997537	intergenic_region	NA	38937422	38967622	evm.model.001214F_PILON.11	XP_021380332.1	uncharacterized_protein_LOC110467469__[Mizuhopecten_yessoensis]	NA	NA	NA	NA	NO
HiC_scaffold_2	39208716	upstream_gene_variant	NA	39201542	39207788	evm.model.000334F_PILON.4	XP_021380362.1	uncharacterized_protein_LOC110467482__[Mizuhopecten_yessoensis]	sp|A5ULW4|MFNA_METS3	Probable_L-tyrosine/L-aspartate_decarboxylase_OS=Methanobrevibacter_smithii_(strain_ATCC_35061_/_DSM_861_/_OCM_144_/_PS)_OX=420247_GN=mfnA_PE=3_SV=1	gur:Gura_0951	K09645_vitellogenic_carboxypeptidase-like_protein_[EC:3.4.16.-]_|_(GenBank)_peptidase_S10,_serine_carboxypeptidase_(A)	NO
HiC_scaffold_2	39208718	upstream_gene_variant	NA	39201542	39207788	evm.model.000334F_PILON.4	XP_021380362.1	uncharacterized_protein_LOC110467482__[Mizuhopecten_yessoensis]	sp|A5ULW4|MFNA_METS3	Probable_L-tyrosine/L-aspartate_decarboxylase_OS=Methanobrevibacter_smithii_(strain_ATCC_35061_/_DSM_861_/_OCM_144_/_PS)_OX=420247_GN=mfnA_PE=3_SV=1	gur:Gura_0951	K09645_vitellogenic_carboxypeptidase-like_protein_[EC:3.4.16.-]_|_(GenBank)_peptidase_S10,_serine_carboxypeptidase_(A)	NO
HiC_scaffold_2	39254334	3_prime_UTR_variant	NA	39226123	39256057	evm.model.000334F_PILON.6	XP_021380247.1	uncharacterized_protein_LOC110467415_isoform_X3__[Mizuhopecten_yessoensis]	NA	NA	egl:EGR_08562	K18622_adducin_|_(RefSeq)_Alpha-adducin_(A)	YES
HiC_scaffold_2	39289646	intron_variant	NA	39257853	39319895	evm.model.000334F_PILON.7	XP_021380214.1	uncharacterized_protein_LOC110467400__[Mizuhopecten_yessoensis]	sp|P57999|ZAN_RABIT	Zonadhesin_(Fragment)_OS=Oryctolagus_cuniculus_OX=9986_GN=ZAN_PE=2_SV=2	lgi:LOTGIDRAFT_230443	K23342_fibrillin_2/3_|_(RefSeq)_hypothetical_protein_(A)	YES
HiC_scaffold_2	39289612	intron_variant	NA	39257853	39319895	evm.model.000334F_PILON.7	XP_021380214.1	uncharacterized_protein_LOC110467400__[Mizuhopecten_yessoensis]	sp|P57999|ZAN_RABIT	Zonadhesin_(Fragment)_OS=Oryctolagus_cuniculus_OX=9986_GN=ZAN_PE=2_SV=2	lgi:LOTGIDRAFT_230443	K23342_fibrillin_2/3_|_(RefSeq)_hypothetical_protein_(A)	YES
HiC_scaffold_2	39303806	intron_variant	NA	39257853	39319895	evm.model.000334F_PILON.7	XP_021380214.1	uncharacterized_protein_LOC110467400__[Mizuhopecten_yessoensis]	sp|P57999|ZAN_RABIT	Zonadhesin_(Fragment)_OS=Oryctolagus_cuniculus_OX=9986_GN=ZAN_PE=2_SV=2	lgi:LOTGIDRAFT_230443	K23342_fibrillin_2/3_|_(RefSeq)_hypothetical_protein_(A)	YES
HiC_scaffold_2	39305128	intron_variant	NA	39257853	39319895	evm.model.000334F_PILON.7	XP_021380214.1	uncharacterized_protein_LOC110467400__[Mizuhopecten_yessoensis]	sp|P57999|ZAN_RABIT	Zonadhesin_(Fragment)_OS=Oryctolagus_cuniculus_OX=9986_GN=ZAN_PE=2_SV=2	lgi:LOTGIDRAFT_230443	K23342_fibrillin_2/3_|_(RefSeq)_hypothetical_protein_(A)	YES
HiC_scaffold_2	39305149	intron_variant	NA	39257853	39319895	evm.model.000334F_PILON.7	XP_021380214.1	uncharacterized_protein_LOC110467400__[Mizuhopecten_yessoensis]	sp|P57999|ZAN_RABIT	Zonadhesin_(Fragment)_OS=Oryctolagus_cuniculus_OX=9986_GN=ZAN_PE=2_SV=2	lgi:LOTGIDRAFT_230443	K23342_fibrillin_2/3_|_(RefSeq)_hypothetical_protein_(A)	YES
HiC_scaffold_2	39315213	intron_variant	NA	39257853	39319895	evm.model.000334F_PILON.7	XP_021380214.1	uncharacterized_protein_LOC110467400__[Mizuhopecten_yessoensis]	sp|P57999|ZAN_RABIT	Zonadhesin_(Fragment)_OS=Oryctolagus_cuniculus_OX=9986_GN=ZAN_PE=2_SV=2	lgi:LOTGIDRAFT_230443	K23342_fibrillin_2/3_|_(RefSeq)_hypothetical_protein_(A)	YES
HiC_scaffold_2	39315201	intron_variant	NA	39257853	39319895	evm.model.000334F_PILON.7	XP_021380214.1	uncharacterized_protein_LOC110467400__[Mizuhopecten_yessoensis]	sp|P57999|ZAN_RABIT	Zonadhesin_(Fragment)_OS=Oryctolagus_cuniculus_OX=9986_GN=ZAN_PE=2_SV=2	lgi:LOTGIDRAFT_230443	K23342_fibrillin_2/3_|_(RefSeq)_hypothetical_protein_(A)	YES
HiC_scaffold_2	39315199	intron_variant	NA	39257853	39319895	evm.model.000334F_PILON.7	XP_021380214.1	uncharacterized_protein_LOC110467400__[Mizuhopecten_yessoensis]	sp|P57999|ZAN_RABIT	Zonadhesin_(Fragment)_OS=Oryctolagus_cuniculus_OX=9986_GN=ZAN_PE=2_SV=2	lgi:LOTGIDRAFT_230443	K23342_fibrillin_2/3_|_(RefSeq)_hypothetical_protein_(A)	YES
HiC_scaffold_2	39325570	intergenic_region	NA	39257853	39319895	evm.model.000334F_PILON.7	XP_021380214.1	uncharacterized_protein_LOC110467400__[Mizuhopecten_yessoensis]	sp|P57999|ZAN_RABIT	Zonadhesin_(Fragment)_OS=Oryctolagus_cuniculus_OX=9986_GN=ZAN_PE=2_SV=2	lgi:LOTGIDRAFT_230443	K23342_fibrillin_2/3_|_(RefSeq)_hypothetical_protein_(A)	NO
HiC_scaffold_2	39325566	intergenic_region	NA	39257853	39319895	evm.model.000334F_PILON.7	XP_021380214.1	uncharacterized_protein_LOC110467400__[Mizuhopecten_yessoensis]	sp|P57999|ZAN_RABIT	Zonadhesin_(Fragment)_OS=Oryctolagus_cuniculus_OX=9986_GN=ZAN_PE=2_SV=2	lgi:LOTGIDRAFT_230443	K23342_fibrillin_2/3_|_(RefSeq)_hypothetical_protein_(A)	NO
HiC_scaffold_2	39325559	intergenic_region	NA	39257853	39319895	evm.model.000334F_PILON.7	XP_021380214.1	uncharacterized_protein_LOC110467400__[Mizuhopecten_yessoensis]	sp|P57999|ZAN_RABIT	Zonadhesin_(Fragment)_OS=Oryctolagus_cuniculus_OX=9986_GN=ZAN_PE=2_SV=2	lgi:LOTGIDRAFT_230443	K23342_fibrillin_2/3_|_(RefSeq)_hypothetical_protein_(A)	NO
HiC_scaffold_2	39351733	intron_variant	NA	39341903	39352324	evm.model.000334F_PILON.9	XP_021380293.1	protein_TBRG4-like__[Mizuhopecten_yessoensis]	sp|Q6PA48|FAKD4_XENLA	FAST_kinase_domain-containing_protein_4_OS=Xenopus_laevis_OX=8355_GN=tbrg4_PE=2_SV=1	NA	NA	YES
HiC_scaffold_2	39384602	intergenic_region	NA	39341903	39352324	evm.model.000334F_PILON.9	XP_021380293.1	protein_TBRG4-like__[Mizuhopecten_yessoensis]	sp|Q6PA48|FAKD4_XENLA	FAST_kinase_domain-containing_protein_4_OS=Xenopus_laevis_OX=8355_GN=tbrg4_PE=2_SV=1	NA	NA	NO
HiC_scaffold_2	39384588	intergenic_region	NA	39341903	39352324	evm.model.000334F_PILON.9	XP_021380293.1	protein_TBRG4-like__[Mizuhopecten_yessoensis]	sp|Q6PA48|FAKD4_XENLA	FAST_kinase_domain-containing_protein_4_OS=Xenopus_laevis_OX=8355_GN=tbrg4_PE=2_SV=1	NA	NA	NO
HiC_scaffold_2	39392669	intergenic_region	NA	39341903	39352324	evm.model.000334F_PILON.9	XP_021380293.1	protein_TBRG4-like__[Mizuhopecten_yessoensis]	sp|Q6PA48|FAKD4_XENLA	FAST_kinase_domain-containing_protein_4_OS=Xenopus_laevis_OX=8355_GN=tbrg4_PE=2_SV=1	NA	NA	NO
HiC_scaffold_2	39612279	intron_variant	NA	39603213	39626337	evm.model.000334F_PILON.18	XP_021380178.1	mucin-17-like_isoform_X1__[Mizuhopecten_yessoensis]	sp|Q9H9B1|EHMT1_HUMAN	Histone-lysine_N-methyltransferase_EHMT1_OS=Homo_sapiens_OX=9606_GN=EHMT1_PE=1_SV=4	myi:110467381	K11420_euchromatic_histone-lysine_N-methyltransferase_[EC:2.1.1.43]_|_(RefSeq)_mucin-17-like_isoform_X1_(A)	YES
HiC_scaffold_2	39615602	synonymous_variant	LOW	39603213	39626337	evm.model.000334F_PILON.18	XP_021380178.1	mucin-17-like_isoform_X1__[Mizuhopecten_yessoensis]	sp|Q9H9B1|EHMT1_HUMAN	Histone-lysine_N-methyltransferase_EHMT1_OS=Homo_sapiens_OX=9606_GN=EHMT1_PE=1_SV=4	myi:110467381	K11420_euchromatic_histone-lysine_N-methyltransferase_[EC:2.1.1.43]_|_(RefSeq)_mucin-17-like_isoform_X1_(A)	YES
HiC_scaffold_2	39633824	intergenic_region	NA	39603213	39626337	evm.model.000334F_PILON.18	XP_021380178.1	mucin-17-like_isoform_X1__[Mizuhopecten_yessoensis]	sp|Q9H9B1|EHMT1_HUMAN	Histone-lysine_N-methyltransferase_EHMT1_OS=Homo_sapiens_OX=9606_GN=EHMT1_PE=1_SV=4	myi:110467381	K11420_euchromatic_histone-lysine_N-methyltransferase_[EC:2.1.1.43]_|_(RefSeq)_mucin-17-like_isoform_X1_(A)	NO
HiC_scaffold_2	39633834	intergenic_region	NA	39603213	39626337	evm.model.000334F_PILON.18	XP_021380178.1	mucin-17-like_isoform_X1__[Mizuhopecten_yessoensis]	sp|Q9H9B1|EHMT1_HUMAN	Histone-lysine_N-methyltransferase_EHMT1_OS=Homo_sapiens_OX=9606_GN=EHMT1_PE=1_SV=4	myi:110467381	K11420_euchromatic_histone-lysine_N-methyltransferase_[EC:2.1.1.43]_|_(RefSeq)_mucin-17-like_isoform_X1_(A)	NO
HiC_scaffold_2	39633848	intergenic_region	NA	39603213	39626337	evm.model.000334F_PILON.18	XP_021380178.1	mucin-17-like_isoform_X1__[Mizuhopecten_yessoensis]	sp|Q9H9B1|EHMT1_HUMAN	Histone-lysine_N-methyltransferase_EHMT1_OS=Homo_sapiens_OX=9606_GN=EHMT1_PE=1_SV=4	myi:110467381	K11420_euchromatic_histone-lysine_N-methyltransferase_[EC:2.1.1.43]_|_(RefSeq)_mucin-17-like_isoform_X1_(A)	NO
HiC_scaffold_2	39633853	intergenic_region	NA	39603213	39626337	evm.model.000334F_PILON.18	XP_021380178.1	mucin-17-like_isoform_X1__[Mizuhopecten_yessoensis]	sp|Q9H9B1|EHMT1_HUMAN	Histone-lysine_N-methyltransferase_EHMT1_OS=Homo_sapiens_OX=9606_GN=EHMT1_PE=1_SV=4	myi:110467381	K11420_euchromatic_histone-lysine_N-methyltransferase_[EC:2.1.1.43]_|_(RefSeq)_mucin-17-like_isoform_X1_(A)	NO
HiC_scaffold_2	39633793	intergenic_region	NA	39603213	39626337	evm.model.000334F_PILON.18	XP_021380178.1	mucin-17-like_isoform_X1__[Mizuhopecten_yessoensis]	sp|Q9H9B1|EHMT1_HUMAN	Histone-lysine_N-methyltransferase_EHMT1_OS=Homo_sapiens_OX=9606_GN=EHMT1_PE=1_SV=4	myi:110467381	K11420_euchromatic_histone-lysine_N-methyltransferase_[EC:2.1.1.43]_|_(RefSeq)_mucin-17-like_isoform_X1_(A)	NO
HiC_scaffold_2	39667529	intergenic_region	NA	39603213	39626337	evm.model.000334F_PILON.18	XP_021380178.1	mucin-17-like_isoform_X1__[Mizuhopecten_yessoensis]	sp|Q9H9B1|EHMT1_HUMAN	Histone-lysine_N-methyltransferase_EHMT1_OS=Homo_sapiens_OX=9606_GN=EHMT1_PE=1_SV=4	myi:110467381	K11420_euchromatic_histone-lysine_N-methyltransferase_[EC:2.1.1.43]_|_(RefSeq)_mucin-17-like_isoform_X1_(A)	NO
HiC_scaffold_2	39667547	intergenic_region	NA	39603213	39626337	evm.model.000334F_PILON.18	XP_021380178.1	mucin-17-like_isoform_X1__[Mizuhopecten_yessoensis]	sp|Q9H9B1|EHMT1_HUMAN	Histone-lysine_N-methyltransferase_EHMT1_OS=Homo_sapiens_OX=9606_GN=EHMT1_PE=1_SV=4	myi:110467381	K11420_euchromatic_histone-lysine_N-methyltransferase_[EC:2.1.1.43]_|_(RefSeq)_mucin-17-like_isoform_X1_(A)	NO
HiC_scaffold_2	39679351	intergenic_region	NA	39603213	39626337	evm.model.000334F_PILON.18	XP_021380178.1	mucin-17-like_isoform_X1__[Mizuhopecten_yessoensis]	sp|Q9H9B1|EHMT1_HUMAN	Histone-lysine_N-methyltransferase_EHMT1_OS=Homo_sapiens_OX=9606_GN=EHMT1_PE=1_SV=4	myi:110467381	K11420_euchromatic_histone-lysine_N-methyltransferase_[EC:2.1.1.43]_|_(RefSeq)_mucin-17-like_isoform_X1_(A)	NO
HiC_scaffold_2	39692868	downstream_gene_variant	NA	39603213	39626337	evm.model.000334F_PILON.18	XP_021380178.1	mucin-17-like_isoform_X1__[Mizuhopecten_yessoensis]	sp|Q9H9B1|EHMT1_HUMAN	Histone-lysine_N-methyltransferase_EHMT1_OS=Homo_sapiens_OX=9606_GN=EHMT1_PE=1_SV=4	myi:110467381	K11420_euchromatic_histone-lysine_N-methyltransferase_[EC:2.1.1.43]_|_(RefSeq)_mucin-17-like_isoform_X1_(A)	NO
HiC_scaffold_2	39909670	intron_variant	NA	39877751	39920937	evm.model.000334F_PILON.27	XP_021380222.1	voltage-dependent_calcium_channel_type_A_subunit_alpha-1-like_isoform_X7__[Mizuhopecten_yessoensis]	sp|C9D7C2|CAC1A_APIME	Voltage-dependent_calcium_channel_type_A_subunit_alpha-1_OS=Apis_mellifera_OX=7460_GN=CAC_PE=2_SV=1	myi:110467402	K04849_voltage-dependent_calcium_channel_N_type_alpha-1B_|_(RefSeq)_voltage-dependent_calcium_channel_type_A_subunit_alpha-1-like_isoform_X1_(A)	YES
HiC_scaffold_2	39909668	intron_variant	NA	39877751	39920937	evm.model.000334F_PILON.27	XP_021380222.1	voltage-dependent_calcium_channel_type_A_subunit_alpha-1-like_isoform_X7__[Mizuhopecten_yessoensis]	sp|C9D7C2|CAC1A_APIME	Voltage-dependent_calcium_channel_type_A_subunit_alpha-1_OS=Apis_mellifera_OX=7460_GN=CAC_PE=2_SV=1	myi:110467402	K04849_voltage-dependent_calcium_channel_N_type_alpha-1B_|_(RefSeq)_voltage-dependent_calcium_channel_type_A_subunit_alpha-1-like_isoform_X1_(A)	YES
HiC_scaffold_2	39909665	intron_variant	NA	39877751	39920937	evm.model.000334F_PILON.27	XP_021380222.1	voltage-dependent_calcium_channel_type_A_subunit_alpha-1-like_isoform_X7__[Mizuhopecten_yessoensis]	sp|C9D7C2|CAC1A_APIME	Voltage-dependent_calcium_channel_type_A_subunit_alpha-1_OS=Apis_mellifera_OX=7460_GN=CAC_PE=2_SV=1	myi:110467402	K04849_voltage-dependent_calcium_channel_N_type_alpha-1B_|_(RefSeq)_voltage-dependent_calcium_channel_type_A_subunit_alpha-1-like_isoform_X1_(A)	YES
HiC_scaffold_2	39910794	intron_variant	NA	39877751	39920937	evm.model.000334F_PILON.27	XP_021380222.1	voltage-dependent_calcium_channel_type_A_subunit_alpha-1-like_isoform_X7__[Mizuhopecten_yessoensis]	sp|C9D7C2|CAC1A_APIME	Voltage-dependent_calcium_channel_type_A_subunit_alpha-1_OS=Apis_mellifera_OX=7460_GN=CAC_PE=2_SV=1	myi:110467402	K04849_voltage-dependent_calcium_channel_N_type_alpha-1B_|_(RefSeq)_voltage-dependent_calcium_channel_type_A_subunit_alpha-1-like_isoform_X1_(A)	YES
HiC_scaffold_2	39915617	intron_variant	NA	39877751	39920937	evm.model.000334F_PILON.27	XP_021380222.1	voltage-dependent_calcium_channel_type_A_subunit_alpha-1-like_isoform_X7__[Mizuhopecten_yessoensis]	sp|C9D7C2|CAC1A_APIME	Voltage-dependent_calcium_channel_type_A_subunit_alpha-1_OS=Apis_mellifera_OX=7460_GN=CAC_PE=2_SV=1	myi:110467402	K04849_voltage-dependent_calcium_channel_N_type_alpha-1B_|_(RefSeq)_voltage-dependent_calcium_channel_type_A_subunit_alpha-1-like_isoform_X1_(A)	YES
HiC_scaffold_2	39915618	intron_variant	NA	39877751	39920937	evm.model.000334F_PILON.27	XP_021380222.1	voltage-dependent_calcium_channel_type_A_subunit_alpha-1-like_isoform_X7__[Mizuhopecten_yessoensis]	sp|C9D7C2|CAC1A_APIME	Voltage-dependent_calcium_channel_type_A_subunit_alpha-1_OS=Apis_mellifera_OX=7460_GN=CAC_PE=2_SV=1	myi:110467402	K04849_voltage-dependent_calcium_channel_N_type_alpha-1B_|_(RefSeq)_voltage-dependent_calcium_channel_type_A_subunit_alpha-1-like_isoform_X1_(A)	YES
HiC_scaffold_2	39915631	intron_variant	NA	39877751	39920937	evm.model.000334F_PILON.27	XP_021380222.1	voltage-dependent_calcium_channel_type_A_subunit_alpha-1-like_isoform_X7__[Mizuhopecten_yessoensis]	sp|C9D7C2|CAC1A_APIME	Voltage-dependent_calcium_channel_type_A_subunit_alpha-1_OS=Apis_mellifera_OX=7460_GN=CAC_PE=2_SV=1	myi:110467402	K04849_voltage-dependent_calcium_channel_N_type_alpha-1B_|_(RefSeq)_voltage-dependent_calcium_channel_type_A_subunit_alpha-1-like_isoform_X1_(A)	YES
HiC_scaffold_2	39920093	intron_variant	NA	39877751	39920937	evm.model.000334F_PILON.27	XP_021380222.1	voltage-dependent_calcium_channel_type_A_subunit_alpha-1-like_isoform_X7__[Mizuhopecten_yessoensis]	sp|C9D7C2|CAC1A_APIME	Voltage-dependent_calcium_channel_type_A_subunit_alpha-1_OS=Apis_mellifera_OX=7460_GN=CAC_PE=2_SV=1	myi:110467402	K04849_voltage-dependent_calcium_channel_N_type_alpha-1B_|_(RefSeq)_voltage-dependent_calcium_channel_type_A_subunit_alpha-1-like_isoform_X1_(A)	YES
HiC_scaffold_2	39940874	intergenic_region	NA	39877751	39920937	evm.model.000334F_PILON.27	XP_021380222.1	voltage-dependent_calcium_channel_type_A_subunit_alpha-1-like_isoform_X7__[Mizuhopecten_yessoensis]	sp|C9D7C2|CAC1A_APIME	Voltage-dependent_calcium_channel_type_A_subunit_alpha-1_OS=Apis_mellifera_OX=7460_GN=CAC_PE=2_SV=1	myi:110467402	K04849_voltage-dependent_calcium_channel_N_type_alpha-1B_|_(RefSeq)_voltage-dependent_calcium_channel_type_A_subunit_alpha-1-like_isoform_X1_(A)	NO
HiC_scaffold_2	39945522	upstream_gene_variant	NA	39877751	39920937	evm.model.000334F_PILON.27	XP_021380222.1	voltage-dependent_calcium_channel_type_A_subunit_alpha-1-like_isoform_X7__[Mizuhopecten_yessoensis]	sp|C9D7C2|CAC1A_APIME	Voltage-dependent_calcium_channel_type_A_subunit_alpha-1_OS=Apis_mellifera_OX=7460_GN=CAC_PE=2_SV=1	myi:110467402	K04849_voltage-dependent_calcium_channel_N_type_alpha-1B_|_(RefSeq)_voltage-dependent_calcium_channel_type_A_subunit_alpha-1-like_isoform_X1_(A)	NO
HiC_scaffold_2	39982200	synonymous_variant	LOW	39949649	40029502	evm.model.000334F_PILON.28	EKC27184.1	Voltage-dependent_L-type_calcium_channel_subunit_alpha-1C__[Crassostrea_gigas]	sp|C9D7C2|CAC1A_APIME	Voltage-dependent_calcium_channel_type_A_subunit_alpha-1_OS=Apis_mellifera_OX=7460_GN=CAC_PE=2_SV=1	myi:110467402	K04849_voltage-dependent_calcium_channel_N_type_alpha-1B_|_(RefSeq)_voltage-dependent_calcium_channel_type_A_subunit_alpha-1-like_isoform_X1_(A)	YES
HiC_scaffold_2	40008748	intron_variant	NA	39949649	40029502	evm.model.000334F_PILON.28	EKC27184.1	Voltage-dependent_L-type_calcium_channel_subunit_alpha-1C__[Crassostrea_gigas]	sp|C9D7C2|CAC1A_APIME	Voltage-dependent_calcium_channel_type_A_subunit_alpha-1_OS=Apis_mellifera_OX=7460_GN=CAC_PE=2_SV=1	myi:110467402	K04849_voltage-dependent_calcium_channel_N_type_alpha-1B_|_(RefSeq)_voltage-dependent_calcium_channel_type_A_subunit_alpha-1-like_isoform_X1_(A)	YES
HiC_scaffold_2	40008745	intron_variant	NA	39949649	40029502	evm.model.000334F_PILON.28	EKC27184.1	Voltage-dependent_L-type_calcium_channel_subunit_alpha-1C__[Crassostrea_gigas]	sp|C9D7C2|CAC1A_APIME	Voltage-dependent_calcium_channel_type_A_subunit_alpha-1_OS=Apis_mellifera_OX=7460_GN=CAC_PE=2_SV=1	myi:110467402	K04849_voltage-dependent_calcium_channel_N_type_alpha-1B_|_(RefSeq)_voltage-dependent_calcium_channel_type_A_subunit_alpha-1-like_isoform_X1_(A)	YES
HiC_scaffold_2	40012954	intron_variant	NA	39949649	40029502	evm.model.000334F_PILON.28	EKC27184.1	Voltage-dependent_L-type_calcium_channel_subunit_alpha-1C__[Crassostrea_gigas]	sp|C9D7C2|CAC1A_APIME	Voltage-dependent_calcium_channel_type_A_subunit_alpha-1_OS=Apis_mellifera_OX=7460_GN=CAC_PE=2_SV=1	myi:110467402	K04849_voltage-dependent_calcium_channel_N_type_alpha-1B_|_(RefSeq)_voltage-dependent_calcium_channel_type_A_subunit_alpha-1-like_isoform_X1_(A)	YES
HiC_scaffold_2	40012965	intron_variant	NA	39949649	40029502	evm.model.000334F_PILON.28	EKC27184.1	Voltage-dependent_L-type_calcium_channel_subunit_alpha-1C__[Crassostrea_gigas]	sp|C9D7C2|CAC1A_APIME	Voltage-dependent_calcium_channel_type_A_subunit_alpha-1_OS=Apis_mellifera_OX=7460_GN=CAC_PE=2_SV=1	myi:110467402	K04849_voltage-dependent_calcium_channel_N_type_alpha-1B_|_(RefSeq)_voltage-dependent_calcium_channel_type_A_subunit_alpha-1-like_isoform_X1_(A)	YES
HiC_scaffold_2	40012928	intron_variant	NA	39949649	40029502	evm.model.000334F_PILON.28	EKC27184.1	Voltage-dependent_L-type_calcium_channel_subunit_alpha-1C__[Crassostrea_gigas]	sp|C9D7C2|CAC1A_APIME	Voltage-dependent_calcium_channel_type_A_subunit_alpha-1_OS=Apis_mellifera_OX=7460_GN=CAC_PE=2_SV=1	myi:110467402	K04849_voltage-dependent_calcium_channel_N_type_alpha-1B_|_(RefSeq)_voltage-dependent_calcium_channel_type_A_subunit_alpha-1-like_isoform_X1_(A)	YES
HiC_scaffold_2	40037384	downstream_gene_variant	NA	40029579	40029932	evm.model.000334F_PILON.29	XP_021380221.1	voltage-dependent_calcium_channel_type_A_subunit_alpha-1-like_isoform_X6__[Mizuhopecten_yessoensis]	NA	NA	myi:110467402	K04849_voltage-dependent_calcium_channel_N_type_alpha-1B_|_(RefSeq)_voltage-dependent_calcium_channel_type_A_subunit_alpha-1-like_isoform_X1_(A)	NO
HiC_scaffold_2	40056821	upstream_gene_variant	NA	40041236	40055460	evm.model.000334F_PILON.30	XP_021380224.1	uncharacterized_protein_C9orf78_homolog__[Mizuhopecten_yessoensis]	sp|Q3TQI7|TLS1_MOUSE	Telomere_length_and_silencing_protein_1_homolog_OS=Mus_musculus_OX=10090_PE=1_SV=2	NA	NA	NO
HiC_scaffold_2	40056826	upstream_gene_variant	NA	40041236	40055460	evm.model.000334F_PILON.30	XP_021380224.1	uncharacterized_protein_C9orf78_homolog__[Mizuhopecten_yessoensis]	sp|Q3TQI7|TLS1_MOUSE	Telomere_length_and_silencing_protein_1_homolog_OS=Mus_musculus_OX=10090_PE=1_SV=2	NA	NA	NO
HiC_scaffold_2	40056791	upstream_gene_variant	NA	40041236	40055460	evm.model.000334F_PILON.30	XP_021380224.1	uncharacterized_protein_C9orf78_homolog__[Mizuhopecten_yessoensis]	sp|Q3TQI7|TLS1_MOUSE	Telomere_length_and_silencing_protein_1_homolog_OS=Mus_musculus_OX=10090_PE=1_SV=2	NA	NA	NO
HiC_scaffold_2	40056789	upstream_gene_variant	NA	40041236	40055460	evm.model.000334F_PILON.30	XP_021380224.1	uncharacterized_protein_C9orf78_homolog__[Mizuhopecten_yessoensis]	sp|Q3TQI7|TLS1_MOUSE	Telomere_length_and_silencing_protein_1_homolog_OS=Mus_musculus_OX=10090_PE=1_SV=2	NA	NA	NO
HiC_scaffold_2	40056770	upstream_gene_variant	NA	40041236	40055460	evm.model.000334F_PILON.30	XP_021380224.1	uncharacterized_protein_C9orf78_homolog__[Mizuhopecten_yessoensis]	sp|Q3TQI7|TLS1_MOUSE	Telomere_length_and_silencing_protein_1_homolog_OS=Mus_musculus_OX=10090_PE=1_SV=2	NA	NA	NO
HiC_scaffold_2	40056761	upstream_gene_variant	NA	40041236	40055460	evm.model.000334F_PILON.30	XP_021380224.1	uncharacterized_protein_C9orf78_homolog__[Mizuhopecten_yessoensis]	sp|Q3TQI7|TLS1_MOUSE	Telomere_length_and_silencing_protein_1_homolog_OS=Mus_musculus_OX=10090_PE=1_SV=2	NA	NA	NO
HiC_scaffold_2	40072339	intron_variant	NA	40058772	40114220	evm.model.000334F_PILON.31	XP_021380223.1	uncharacterized_protein_LOC110467403__[Mizuhopecten_yessoensis]	sp|Q7Z0T3|TEMPT_APLCA	Temptin_OS=Aplysia_californica_OX=6500_PE=1_SV=1	lgi:LOTGIDRAFT_162200	K00503_dopamine_beta-monooxygenase_[EC:1.14.17.1]_|_(RefSeq)_hypothetical_protein_(A)	YES
HiC_scaffold_2	40072361	intron_variant	NA	40058772	40114220	evm.model.000334F_PILON.31	XP_021380223.1	uncharacterized_protein_LOC110467403__[Mizuhopecten_yessoensis]	sp|Q7Z0T3|TEMPT_APLCA	Temptin_OS=Aplysia_californica_OX=6500_PE=1_SV=1	lgi:LOTGIDRAFT_162200	K00503_dopamine_beta-monooxygenase_[EC:1.14.17.1]_|_(RefSeq)_hypothetical_protein_(A)	YES
HiC_scaffold_3	1106975	intron_variant	NA	1045300	1186928	evm.model.001171F_PILON.15_evm.model.001171F_PILON.20	XP_021357719.1	inactive_tyrosine-protein_kinase_7-like__[Mizuhopecten_yessoensis]	sp|Q91048|PTK7_CHICK	Inactive_tyrosine-protein_kinase_7_OS=Gallus_gallus_OX=9031_GN=PTK7_PE=2_SV=1	myi:110453192	K05127_PTK7_protein_tyrosine_kinase_7_[EC:2.7.10.1]_|_(RefSeq)_inactive_tyrosine-protein_kinase_7-like_(A)	YES
HiC_scaffold_3	1122391	intron_variant	NA	1045300	1186928	evm.model.001171F_PILON.15_evm.model.001171F_PILON.20	XP_021357719.1	inactive_tyrosine-protein_kinase_7-like__[Mizuhopecten_yessoensis]	sp|Q91048|PTK7_CHICK	Inactive_tyrosine-protein_kinase_7_OS=Gallus_gallus_OX=9031_GN=PTK7_PE=2_SV=1	myi:110453192	K05127_PTK7_protein_tyrosine_kinase_7_[EC:2.7.10.1]_|_(RefSeq)_inactive_tyrosine-protein_kinase_7-like_(A)	YES
HiC_scaffold_3	1151761	intron_variant	NA	1045300	1186928	evm.model.001171F_PILON.15_evm.model.001171F_PILON.20	XP_021357719.1	inactive_tyrosine-protein_kinase_7-like__[Mizuhopecten_yessoensis]	sp|Q91048|PTK7_CHICK	Inactive_tyrosine-protein_kinase_7_OS=Gallus_gallus_OX=9031_GN=PTK7_PE=2_SV=1	myi:110453192	K05127_PTK7_protein_tyrosine_kinase_7_[EC:2.7.10.1]_|_(RefSeq)_inactive_tyrosine-protein_kinase_7-like_(A)	YES
HiC_scaffold_3	1164146	synonymous_variant	LOW	1045300	1186928	evm.model.001171F_PILON.15_evm.model.001171F_PILON.20	XP_021357719.1	inactive_tyrosine-protein_kinase_7-like__[Mizuhopecten_yessoensis]	sp|Q91048|PTK7_CHICK	Inactive_tyrosine-protein_kinase_7_OS=Gallus_gallus_OX=9031_GN=PTK7_PE=2_SV=1	myi:110453192	K05127_PTK7_protein_tyrosine_kinase_7_[EC:2.7.10.1]_|_(RefSeq)_inactive_tyrosine-protein_kinase_7-like_(A)	YES
HiC_scaffold_3	1164152	synonymous_variant	LOW	1045300	1186928	evm.model.001171F_PILON.15_evm.model.001171F_PILON.20	XP_021357719.1	inactive_tyrosine-protein_kinase_7-like__[Mizuhopecten_yessoensis]	sp|Q91048|PTK7_CHICK	Inactive_tyrosine-protein_kinase_7_OS=Gallus_gallus_OX=9031_GN=PTK7_PE=2_SV=1	myi:110453192	K05127_PTK7_protein_tyrosine_kinase_7_[EC:2.7.10.1]_|_(RefSeq)_inactive_tyrosine-protein_kinase_7-like_(A)	YES
HiC_scaffold_3	3320969	intron_variant	NA	3311684	3334785	evm.model.000005F_PILON.49	XP_021347365.1	sphingosine-1-phosphate_phosphatase_2-like__[Mizuhopecten_yessoensis]	sp|Q99P55|SGPP1_RAT	Sphingosine-1-phosphate_phosphatase_1_OS=Rattus_norvegicus_OX=10116_GN=Sgpp1_PE=1_SV=2	myi:110446509	K04716_sphingosine-1-phosphate_phosphatase_1_[EC:3.1.3.-]_|_(RefSeq)_sphingosine-1-phosphate_phosphatase_2-like_(A)	YES
HiC_scaffold_3	3320980	intron_variant	NA	3311684	3334785	evm.model.000005F_PILON.49	XP_021347365.1	sphingosine-1-phosphate_phosphatase_2-like__[Mizuhopecten_yessoensis]	sp|Q99P55|SGPP1_RAT	Sphingosine-1-phosphate_phosphatase_1_OS=Rattus_norvegicus_OX=10116_GN=Sgpp1_PE=1_SV=2	myi:110446509	K04716_sphingosine-1-phosphate_phosphatase_1_[EC:3.1.3.-]_|_(RefSeq)_sphingosine-1-phosphate_phosphatase_2-like_(A)	YES
HiC_scaffold_3	3320994	intron_variant	NA	3311684	3334785	evm.model.000005F_PILON.49	XP_021347365.1	sphingosine-1-phosphate_phosphatase_2-like__[Mizuhopecten_yessoensis]	sp|Q99P55|SGPP1_RAT	Sphingosine-1-phosphate_phosphatase_1_OS=Rattus_norvegicus_OX=10116_GN=Sgpp1_PE=1_SV=2	myi:110446509	K04716_sphingosine-1-phosphate_phosphatase_1_[EC:3.1.3.-]_|_(RefSeq)_sphingosine-1-phosphate_phosphatase_2-like_(A)	YES
HiC_scaffold_3	3334547	missense_variant	MODERATE	3311684	3334785	evm.model.000005F_PILON.49	XP_021347365.1	sphingosine-1-phosphate_phosphatase_2-like__[Mizuhopecten_yessoensis]	sp|Q99P55|SGPP1_RAT	Sphingosine-1-phosphate_phosphatase_1_OS=Rattus_norvegicus_OX=10116_GN=Sgpp1_PE=1_SV=2	myi:110446509	K04716_sphingosine-1-phosphate_phosphatase_1_[EC:3.1.3.-]_|_(RefSeq)_sphingosine-1-phosphate_phosphatase_2-like_(A)	YES
HiC_scaffold_3	3339876	upstream_gene_variant	NA	3311684	3334785	evm.model.000005F_PILON.49	XP_021347365.1	sphingosine-1-phosphate_phosphatase_2-like__[Mizuhopecten_yessoensis]	sp|Q99P55|SGPP1_RAT	Sphingosine-1-phosphate_phosphatase_1_OS=Rattus_norvegicus_OX=10116_GN=Sgpp1_PE=1_SV=2	myi:110446509	K04716_sphingosine-1-phosphate_phosphatase_1_[EC:3.1.3.-]_|_(RefSeq)_sphingosine-1-phosphate_phosphatase_2-like_(A)	NO
HiC_scaffold_3	3356804	synonymous_variant	LOW	3352762	3365042	evm.model.000005F_PILON.47	XP_021347367.1	REST_corepressor_3-like__[Mizuhopecten_yessoensis]	sp|Q9P2K3|RCOR3_HUMAN	REST_corepressor_3_OS=Homo_sapiens_OX=9606_GN=RCOR3_PE=1_SV=2	phyp:113529845	K11829_REST_corepressor_1_|_(RefSeq)_rcor1;_REST_corepressor_1_isoform_X1_(A)	YES
HiC_scaffold_3	3425268	downstream_gene_variant	NA	3420067	3421885	evm.model.000005F_PILON.40	XP_006820381.1	PREDICTED:_uncharacterized_protein_LOC100375086__[Saccoglossus_kowalevskii]	NA	NA	sko:100375086	K16449_regulator_of_G-protein_signaling_|_(RefSeq)_uncharacterized_LOC100375086_(A)	NO
HiC_scaffold_3	3455706	intergenic_region	NA	3420067	3421885	evm.model.000005F_PILON.40	XP_006820381.1	PREDICTED:_uncharacterized_protein_LOC100375086__[Saccoglossus_kowalevskii]	NA	NA	sko:100375086	K16449_regulator_of_G-protein_signaling_|_(RefSeq)_uncharacterized_LOC100375086_(A)	NO
HiC_scaffold_3	3455699	intergenic_region	NA	3420067	3421885	evm.model.000005F_PILON.40	XP_006820381.1	PREDICTED:_uncharacterized_protein_LOC100375086__[Saccoglossus_kowalevskii]	NA	NA	sko:100375086	K16449_regulator_of_G-protein_signaling_|_(RefSeq)_uncharacterized_LOC100375086_(A)	NO
HiC_scaffold_3	3455688	intergenic_region	NA	3420067	3421885	evm.model.000005F_PILON.40	XP_006820381.1	PREDICTED:_uncharacterized_protein_LOC100375086__[Saccoglossus_kowalevskii]	NA	NA	sko:100375086	K16449_regulator_of_G-protein_signaling_|_(RefSeq)_uncharacterized_LOC100375086_(A)	NO
HiC_scaffold_3	3455676	intergenic_region	NA	3420067	3421885	evm.model.000005F_PILON.40	XP_006820381.1	PREDICTED:_uncharacterized_protein_LOC100375086__[Saccoglossus_kowalevskii]	NA	NA	sko:100375086	K16449_regulator_of_G-protein_signaling_|_(RefSeq)_uncharacterized_LOC100375086_(A)	NO
HiC_scaffold_3	3455675	intergenic_region	NA	3420067	3421885	evm.model.000005F_PILON.40	XP_006820381.1	PREDICTED:_uncharacterized_protein_LOC100375086__[Saccoglossus_kowalevskii]	NA	NA	sko:100375086	K16449_regulator_of_G-protein_signaling_|_(RefSeq)_uncharacterized_LOC100375086_(A)	NO
HiC_scaffold_3	3462902	intergenic_region	NA	3420067	3421885	evm.model.000005F_PILON.40	XP_006820381.1	PREDICTED:_uncharacterized_protein_LOC100375086__[Saccoglossus_kowalevskii]	NA	NA	sko:100375086	K16449_regulator_of_G-protein_signaling_|_(RefSeq)_uncharacterized_LOC100375086_(A)	NO
HiC_scaffold_3	3462911	intergenic_region	NA	3420067	3421885	evm.model.000005F_PILON.40	XP_006820381.1	PREDICTED:_uncharacterized_protein_LOC100375086__[Saccoglossus_kowalevskii]	NA	NA	sko:100375086	K16449_regulator_of_G-protein_signaling_|_(RefSeq)_uncharacterized_LOC100375086_(A)	NO
HiC_scaffold_3	3462912	intergenic_region	NA	3420067	3421885	evm.model.000005F_PILON.40	XP_006820381.1	PREDICTED:_uncharacterized_protein_LOC100375086__[Saccoglossus_kowalevskii]	NA	NA	sko:100375086	K16449_regulator_of_G-protein_signaling_|_(RefSeq)_uncharacterized_LOC100375086_(A)	NO
HiC_scaffold_3	3462852	intergenic_region	NA	3420067	3421885	evm.model.000005F_PILON.40	XP_006820381.1	PREDICTED:_uncharacterized_protein_LOC100375086__[Saccoglossus_kowalevskii]	NA	NA	sko:100375086	K16449_regulator_of_G-protein_signaling_|_(RefSeq)_uncharacterized_LOC100375086_(A)	NO
HiC_scaffold_3	3462851	intergenic_region	NA	3420067	3421885	evm.model.000005F_PILON.40	XP_006820381.1	PREDICTED:_uncharacterized_protein_LOC100375086__[Saccoglossus_kowalevskii]	NA	NA	sko:100375086	K16449_regulator_of_G-protein_signaling_|_(RefSeq)_uncharacterized_LOC100375086_(A)	NO
HiC_scaffold_3	3477519	intergenic_region	NA	3420067	3421885	evm.model.000005F_PILON.40	XP_006820381.1	PREDICTED:_uncharacterized_protein_LOC100375086__[Saccoglossus_kowalevskii]	NA	NA	sko:100375086	K16449_regulator_of_G-protein_signaling_|_(RefSeq)_uncharacterized_LOC100375086_(A)	NO
HiC_scaffold_3	3541783	intergenic_region	NA	3420067	3421885	evm.model.000005F_PILON.40	XP_006820381.1	PREDICTED:_uncharacterized_protein_LOC100375086__[Saccoglossus_kowalevskii]	NA	NA	sko:100375086	K16449_regulator_of_G-protein_signaling_|_(RefSeq)_uncharacterized_LOC100375086_(A)	NO
HiC_scaffold_3	3555954	intergenic_region	NA	3420067	3421885	evm.model.000005F_PILON.40	XP_006820381.1	PREDICTED:_uncharacterized_protein_LOC100375086__[Saccoglossus_kowalevskii]	NA	NA	sko:100375086	K16449_regulator_of_G-protein_signaling_|_(RefSeq)_uncharacterized_LOC100375086_(A)	NO
HiC_scaffold_3	3564400	missense_variant	MODERATE	3563533	3631206	evm.model.000005F_PILON.36	XP_021374851.1	B-cell_lymphoma/leukemia_11A-like__[Mizuhopecten_yessoensis]	sp|Q99PV8|BC11B_MOUSE	B-cell_lymphoma/leukemia_11B_OS=Mus_musculus_OX=10090_GN=Bcl11b_PE=1_SV=1	myi:110464113	K22045_B-cell_lymphoma/leukemia_11A_|_(RefSeq)_B-cell_lymphoma/leukemia_11A-like_(A)	YES
HiC_scaffold_3	3569844	intron_variant	NA	3563533	3631206	evm.model.000005F_PILON.36	XP_021374851.1	B-cell_lymphoma/leukemia_11A-like__[Mizuhopecten_yessoensis]	sp|Q99PV8|BC11B_MOUSE	B-cell_lymphoma/leukemia_11B_OS=Mus_musculus_OX=10090_GN=Bcl11b_PE=1_SV=1	myi:110464113	K22045_B-cell_lymphoma/leukemia_11A_|_(RefSeq)_B-cell_lymphoma/leukemia_11A-like_(A)	YES
HiC_scaffold_3	3569829	intron_variant	NA	3563533	3631206	evm.model.000005F_PILON.36	XP_021374851.1	B-cell_lymphoma/leukemia_11A-like__[Mizuhopecten_yessoensis]	sp|Q99PV8|BC11B_MOUSE	B-cell_lymphoma/leukemia_11B_OS=Mus_musculus_OX=10090_GN=Bcl11b_PE=1_SV=1	myi:110464113	K22045_B-cell_lymphoma/leukemia_11A_|_(RefSeq)_B-cell_lymphoma/leukemia_11A-like_(A)	YES
HiC_scaffold_3	3585289	intron_variant	NA	3563533	3631206	evm.model.000005F_PILON.36	XP_021374851.1	B-cell_lymphoma/leukemia_11A-like__[Mizuhopecten_yessoensis]	sp|Q99PV8|BC11B_MOUSE	B-cell_lymphoma/leukemia_11B_OS=Mus_musculus_OX=10090_GN=Bcl11b_PE=1_SV=1	myi:110464113	K22045_B-cell_lymphoma/leukemia_11A_|_(RefSeq)_B-cell_lymphoma/leukemia_11A-like_(A)	YES
HiC_scaffold_3	3589476	intron_variant	NA	3563533	3631206	evm.model.000005F_PILON.36	XP_021374851.1	B-cell_lymphoma/leukemia_11A-like__[Mizuhopecten_yessoensis]	sp|Q99PV8|BC11B_MOUSE	B-cell_lymphoma/leukemia_11B_OS=Mus_musculus_OX=10090_GN=Bcl11b_PE=1_SV=1	myi:110464113	K22045_B-cell_lymphoma/leukemia_11A_|_(RefSeq)_B-cell_lymphoma/leukemia_11A-like_(A)	YES
HiC_scaffold_3	3589485	intron_variant	NA	3563533	3631206	evm.model.000005F_PILON.36	XP_021374851.1	B-cell_lymphoma/leukemia_11A-like__[Mizuhopecten_yessoensis]	sp|Q99PV8|BC11B_MOUSE	B-cell_lymphoma/leukemia_11B_OS=Mus_musculus_OX=10090_GN=Bcl11b_PE=1_SV=1	myi:110464113	K22045_B-cell_lymphoma/leukemia_11A_|_(RefSeq)_B-cell_lymphoma/leukemia_11A-like_(A)	YES
HiC_scaffold_3	3622813	intron_variant	NA	3563533	3631206	evm.model.000005F_PILON.36	XP_021374851.1	B-cell_lymphoma/leukemia_11A-like__[Mizuhopecten_yessoensis]	sp|Q99PV8|BC11B_MOUSE	B-cell_lymphoma/leukemia_11B_OS=Mus_musculus_OX=10090_GN=Bcl11b_PE=1_SV=1	myi:110464113	K22045_B-cell_lymphoma/leukemia_11A_|_(RefSeq)_B-cell_lymphoma/leukemia_11A-like_(A)	YES
HiC_scaffold_3	3622819	intron_variant	NA	3563533	3631206	evm.model.000005F_PILON.36	XP_021374851.1	B-cell_lymphoma/leukemia_11A-like__[Mizuhopecten_yessoensis]	sp|Q99PV8|BC11B_MOUSE	B-cell_lymphoma/leukemia_11B_OS=Mus_musculus_OX=10090_GN=Bcl11b_PE=1_SV=1	myi:110464113	K22045_B-cell_lymphoma/leukemia_11A_|_(RefSeq)_B-cell_lymphoma/leukemia_11A-like_(A)	YES
HiC_scaffold_3	3622754	intron_variant	NA	3563533	3631206	evm.model.000005F_PILON.36	XP_021374851.1	B-cell_lymphoma/leukemia_11A-like__[Mizuhopecten_yessoensis]	sp|Q99PV8|BC11B_MOUSE	B-cell_lymphoma/leukemia_11B_OS=Mus_musculus_OX=10090_GN=Bcl11b_PE=1_SV=1	myi:110464113	K22045_B-cell_lymphoma/leukemia_11A_|_(RefSeq)_B-cell_lymphoma/leukemia_11A-like_(A)	YES
HiC_scaffold_3	3622749	intron_variant	NA	3563533	3631206	evm.model.000005F_PILON.36	XP_021374851.1	B-cell_lymphoma/leukemia_11A-like__[Mizuhopecten_yessoensis]	sp|Q99PV8|BC11B_MOUSE	B-cell_lymphoma/leukemia_11B_OS=Mus_musculus_OX=10090_GN=Bcl11b_PE=1_SV=1	myi:110464113	K22045_B-cell_lymphoma/leukemia_11A_|_(RefSeq)_B-cell_lymphoma/leukemia_11A-like_(A)	YES
HiC_scaffold_3	3626142	intron_variant	NA	3563533	3631206	evm.model.000005F_PILON.36	XP_021374851.1	B-cell_lymphoma/leukemia_11A-like__[Mizuhopecten_yessoensis]	sp|Q99PV8|BC11B_MOUSE	B-cell_lymphoma/leukemia_11B_OS=Mus_musculus_OX=10090_GN=Bcl11b_PE=1_SV=1	myi:110464113	K22045_B-cell_lymphoma/leukemia_11A_|_(RefSeq)_B-cell_lymphoma/leukemia_11A-like_(A)	YES
HiC_scaffold_3	3661658	intergenic_region	NA	3563533	3631206	evm.model.000005F_PILON.36	XP_021374851.1	B-cell_lymphoma/leukemia_11A-like__[Mizuhopecten_yessoensis]	sp|Q99PV8|BC11B_MOUSE	B-cell_lymphoma/leukemia_11B_OS=Mus_musculus_OX=10090_GN=Bcl11b_PE=1_SV=1	myi:110464113	K22045_B-cell_lymphoma/leukemia_11A_|_(RefSeq)_B-cell_lymphoma/leukemia_11A-like_(A)	NO
HiC_scaffold_3	3661639	intergenic_region	NA	3563533	3631206	evm.model.000005F_PILON.36	XP_021374851.1	B-cell_lymphoma/leukemia_11A-like__[Mizuhopecten_yessoensis]	sp|Q99PV8|BC11B_MOUSE	B-cell_lymphoma/leukemia_11B_OS=Mus_musculus_OX=10090_GN=Bcl11b_PE=1_SV=1	myi:110464113	K22045_B-cell_lymphoma/leukemia_11A_|_(RefSeq)_B-cell_lymphoma/leukemia_11A-like_(A)	NO
HiC_scaffold_3	3665247	intergenic_region	NA	3563533	3631206	evm.model.000005F_PILON.36	XP_021374851.1	B-cell_lymphoma/leukemia_11A-like__[Mizuhopecten_yessoensis]	sp|Q99PV8|BC11B_MOUSE	B-cell_lymphoma/leukemia_11B_OS=Mus_musculus_OX=10090_GN=Bcl11b_PE=1_SV=1	myi:110464113	K22045_B-cell_lymphoma/leukemia_11A_|_(RefSeq)_B-cell_lymphoma/leukemia_11A-like_(A)	NO
HiC_scaffold_3	3665249	intergenic_region	NA	3563533	3631206	evm.model.000005F_PILON.36	XP_021374851.1	B-cell_lymphoma/leukemia_11A-like__[Mizuhopecten_yessoensis]	sp|Q99PV8|BC11B_MOUSE	B-cell_lymphoma/leukemia_11B_OS=Mus_musculus_OX=10090_GN=Bcl11b_PE=1_SV=1	myi:110464113	K22045_B-cell_lymphoma/leukemia_11A_|_(RefSeq)_B-cell_lymphoma/leukemia_11A-like_(A)	NO
HiC_scaffold_3	5209827	intergenic_region	NA	5200359	5203139	evm.model.000352F_PILON.22	VDC61989.1	unnamed_protein_product,_partial__[Brassica_rapa]	NA	NA	bfo:BRAFLDRAFT_64295	K15192_TATA-binding_protein-associated_factor_[EC:3.6.4.-]_|_(RefSeq)_hypothetical_protein_(A)	NO
HiC_scaffold_3	5224438	intergenic_region	NA	5200359	5203139	evm.model.000352F_PILON.22	VDC61989.1	unnamed_protein_product,_partial__[Brassica_rapa]	NA	NA	bfo:BRAFLDRAFT_64295	K15192_TATA-binding_protein-associated_factor_[EC:3.6.4.-]_|_(RefSeq)_hypothetical_protein_(A)	NO
HiC_scaffold_3	5232085	intergenic_region	NA	5200359	5203139	evm.model.000352F_PILON.22	VDC61989.1	unnamed_protein_product,_partial__[Brassica_rapa]	NA	NA	bfo:BRAFLDRAFT_64295	K15192_TATA-binding_protein-associated_factor_[EC:3.6.4.-]_|_(RefSeq)_hypothetical_protein_(A)	NO
HiC_scaffold_3	5260521	intergenic_region	NA	5200359	5203139	evm.model.000352F_PILON.22	VDC61989.1	unnamed_protein_product,_partial__[Brassica_rapa]	NA	NA	bfo:BRAFLDRAFT_64295	K15192_TATA-binding_protein-associated_factor_[EC:3.6.4.-]_|_(RefSeq)_hypothetical_protein_(A)	NO
HiC_scaffold_3	5262537	intergenic_region	NA	5200359	5203139	evm.model.000352F_PILON.22	VDC61989.1	unnamed_protein_product,_partial__[Brassica_rapa]	NA	NA	bfo:BRAFLDRAFT_64295	K15192_TATA-binding_protein-associated_factor_[EC:3.6.4.-]_|_(RefSeq)_hypothetical_protein_(A)	NO
HiC_scaffold_3	5270072	intergenic_region	NA	5200359	5203139	evm.model.000352F_PILON.22	VDC61989.1	unnamed_protein_product,_partial__[Brassica_rapa]	NA	NA	bfo:BRAFLDRAFT_64295	K15192_TATA-binding_protein-associated_factor_[EC:3.6.4.-]_|_(RefSeq)_hypothetical_protein_(A)	NO
HiC_scaffold_3	5270078	intergenic_region	NA	5200359	5203139	evm.model.000352F_PILON.22	VDC61989.1	unnamed_protein_product,_partial__[Brassica_rapa]	NA	NA	bfo:BRAFLDRAFT_64295	K15192_TATA-binding_protein-associated_factor_[EC:3.6.4.-]_|_(RefSeq)_hypothetical_protein_(A)	NO
HiC_scaffold_3	5270038	intergenic_region	NA	5200359	5203139	evm.model.000352F_PILON.22	VDC61989.1	unnamed_protein_product,_partial__[Brassica_rapa]	NA	NA	bfo:BRAFLDRAFT_64295	K15192_TATA-binding_protein-associated_factor_[EC:3.6.4.-]_|_(RefSeq)_hypothetical_protein_(A)	NO
HiC_scaffold_3	5270009	intergenic_region	NA	5200359	5203139	evm.model.000352F_PILON.22	VDC61989.1	unnamed_protein_product,_partial__[Brassica_rapa]	NA	NA	bfo:BRAFLDRAFT_64295	K15192_TATA-binding_protein-associated_factor_[EC:3.6.4.-]_|_(RefSeq)_hypothetical_protein_(A)	NO
HiC_scaffold_3	5297552	intergenic_region	NA	5200359	5203139	evm.model.000352F_PILON.22	VDC61989.1	unnamed_protein_product,_partial__[Brassica_rapa]	NA	NA	bfo:BRAFLDRAFT_64295	K15192_TATA-binding_protein-associated_factor_[EC:3.6.4.-]_|_(RefSeq)_hypothetical_protein_(A)	NO
HiC_scaffold_3	5297564	intergenic_region	NA	5200359	5203139	evm.model.000352F_PILON.22	VDC61989.1	unnamed_protein_product,_partial__[Brassica_rapa]	NA	NA	bfo:BRAFLDRAFT_64295	K15192_TATA-binding_protein-associated_factor_[EC:3.6.4.-]_|_(RefSeq)_hypothetical_protein_(A)	NO
HiC_scaffold_3	5297522	intergenic_region	NA	5200359	5203139	evm.model.000352F_PILON.22	VDC61989.1	unnamed_protein_product,_partial__[Brassica_rapa]	NA	NA	bfo:BRAFLDRAFT_64295	K15192_TATA-binding_protein-associated_factor_[EC:3.6.4.-]_|_(RefSeq)_hypothetical_protein_(A)	NO
HiC_scaffold_3	5297510	intergenic_region	NA	5200359	5203139	evm.model.000352F_PILON.22	VDC61989.1	unnamed_protein_product,_partial__[Brassica_rapa]	NA	NA	bfo:BRAFLDRAFT_64295	K15192_TATA-binding_protein-associated_factor_[EC:3.6.4.-]_|_(RefSeq)_hypothetical_protein_(A)	NO
HiC_scaffold_3	5297496	intergenic_region	NA	5200359	5203139	evm.model.000352F_PILON.22	VDC61989.1	unnamed_protein_product,_partial__[Brassica_rapa]	NA	NA	bfo:BRAFLDRAFT_64295	K15192_TATA-binding_protein-associated_factor_[EC:3.6.4.-]_|_(RefSeq)_hypothetical_protein_(A)	NO
HiC_scaffold_3	6403133	downstream_gene_variant	NA	6391927	6402943	evm.model.000132F_PILON.57	OWF56417.1	Multiple_coagulation_factor_deficiency_protein_2-like__[Mizuhopecten_yessoensis]	sp|Q5R8Z6|MCFD2_PONAB	Multiple_coagulation_factor_deficiency_protein_2_homolog_OS=Pongo_abelii_OX=9601_GN=MCFD2_PE=2_SV=1	myi:110447733	K20364_multiple_coagulation_factor_deficiency_protein_2_|_(RefSeq)_N66_matrix_protein-like_isoform_X1_(A)	NO
HiC_scaffold_3	6403138	downstream_gene_variant	NA	6391927	6402943	evm.model.000132F_PILON.57	OWF56417.1	Multiple_coagulation_factor_deficiency_protein_2-like__[Mizuhopecten_yessoensis]	sp|Q5R8Z6|MCFD2_PONAB	Multiple_coagulation_factor_deficiency_protein_2_homolog_OS=Pongo_abelii_OX=9601_GN=MCFD2_PE=2_SV=1	myi:110447733	K20364_multiple_coagulation_factor_deficiency_protein_2_|_(RefSeq)_N66_matrix_protein-like_isoform_X1_(A)	NO
HiC_scaffold_3	6403078	downstream_gene_variant	NA	6391927	6402943	evm.model.000132F_PILON.57	OWF56417.1	Multiple_coagulation_factor_deficiency_protein_2-like__[Mizuhopecten_yessoensis]	sp|Q5R8Z6|MCFD2_PONAB	Multiple_coagulation_factor_deficiency_protein_2_homolog_OS=Pongo_abelii_OX=9601_GN=MCFD2_PE=2_SV=1	myi:110447733	K20364_multiple_coagulation_factor_deficiency_protein_2_|_(RefSeq)_N66_matrix_protein-like_isoform_X1_(A)	NO
HiC_scaffold_3	6403067	downstream_gene_variant	NA	6391927	6402943	evm.model.000132F_PILON.57	OWF56417.1	Multiple_coagulation_factor_deficiency_protein_2-like__[Mizuhopecten_yessoensis]	sp|Q5R8Z6|MCFD2_PONAB	Multiple_coagulation_factor_deficiency_protein_2_homolog_OS=Pongo_abelii_OX=9601_GN=MCFD2_PE=2_SV=1	myi:110447733	K20364_multiple_coagulation_factor_deficiency_protein_2_|_(RefSeq)_N66_matrix_protein-like_isoform_X1_(A)	NO
HiC_scaffold_3	6475643	intergenic_region	NA	6413334	6429036	evm.model.000132F_PILON.55	XP_021349125.1	LOW_QUALITY_PROTEIN:_homeobox_protein_prophet_of_Pit-1-like__[Mizuhopecten_yessoensis]	sp|P23759|PAX7_HUMAN	Paired_box_protein_Pax-7_OS=Homo_sapiens_OX=9606_GN=PAX7_PE=1_SV=4	lcm:102362957	K09327_homeobox_protein_prophet_of_Pit-1_|_(RefSeq)_homeobox_protein_prophet_of_Pit-1-like_(A)	NO
HiC_scaffold_3	6497532	intergenic_region	NA	6413334	6429036	evm.model.000132F_PILON.55	XP_021349125.1	LOW_QUALITY_PROTEIN:_homeobox_protein_prophet_of_Pit-1-like__[Mizuhopecten_yessoensis]	sp|P23759|PAX7_HUMAN	Paired_box_protein_Pax-7_OS=Homo_sapiens_OX=9606_GN=PAX7_PE=1_SV=4	lcm:102362957	K09327_homeobox_protein_prophet_of_Pit-1_|_(RefSeq)_homeobox_protein_prophet_of_Pit-1-like_(A)	NO
HiC_scaffold_3	6497536	intergenic_region	NA	6413334	6429036	evm.model.000132F_PILON.55	XP_021349125.1	LOW_QUALITY_PROTEIN:_homeobox_protein_prophet_of_Pit-1-like__[Mizuhopecten_yessoensis]	sp|P23759|PAX7_HUMAN	Paired_box_protein_Pax-7_OS=Homo_sapiens_OX=9606_GN=PAX7_PE=1_SV=4	lcm:102362957	K09327_homeobox_protein_prophet_of_Pit-1_|_(RefSeq)_homeobox_protein_prophet_of_Pit-1-like_(A)	NO
HiC_scaffold_3	6497476	intergenic_region	NA	6413334	6429036	evm.model.000132F_PILON.55	XP_021349125.1	LOW_QUALITY_PROTEIN:_homeobox_protein_prophet_of_Pit-1-like__[Mizuhopecten_yessoensis]	sp|P23759|PAX7_HUMAN	Paired_box_protein_Pax-7_OS=Homo_sapiens_OX=9606_GN=PAX7_PE=1_SV=4	lcm:102362957	K09327_homeobox_protein_prophet_of_Pit-1_|_(RefSeq)_homeobox_protein_prophet_of_Pit-1-like_(A)	NO
HiC_scaffold_3	6497465	intergenic_region	NA	6413334	6429036	evm.model.000132F_PILON.55	XP_021349125.1	LOW_QUALITY_PROTEIN:_homeobox_protein_prophet_of_Pit-1-like__[Mizuhopecten_yessoensis]	sp|P23759|PAX7_HUMAN	Paired_box_protein_Pax-7_OS=Homo_sapiens_OX=9606_GN=PAX7_PE=1_SV=4	lcm:102362957	K09327_homeobox_protein_prophet_of_Pit-1_|_(RefSeq)_homeobox_protein_prophet_of_Pit-1-like_(A)	NO
HiC_scaffold_3	6713292	downstream_gene_variant	NA	6682311	6710035	evm.model.000132F_PILON.46	OWF56429.1	Protein_O-mannosyl-transferase_2__[Mizuhopecten_yessoensis]	sp|Q29IL2|POMT2_DROPS	Protein_O-mannosyl-transferase_2_OS=Drosophila_pseudoobscura_pseudoobscura_OX=46245_GN=tw_PE=3_SV=1	myi:110447844	K00728_dolichyl-phosphate-mannose-protein_mannosyltransferase_[EC:2.4.1.109]_|_(RefSeq)_protein_O-mannosyl-transferase_2-like_(A)	NO
HiC_scaffold_3	6713294	downstream_gene_variant	NA	6682311	6710035	evm.model.000132F_PILON.46	OWF56429.1	Protein_O-mannosyl-transferase_2__[Mizuhopecten_yessoensis]	sp|Q29IL2|POMT2_DROPS	Protein_O-mannosyl-transferase_2_OS=Drosophila_pseudoobscura_pseudoobscura_OX=46245_GN=tw_PE=3_SV=1	myi:110447844	K00728_dolichyl-phosphate-mannose-protein_mannosyltransferase_[EC:2.4.1.109]_|_(RefSeq)_protein_O-mannosyl-transferase_2-like_(A)	NO
HiC_scaffold_3	6732272	intergenic_region	NA	6682311	6710035	evm.model.000132F_PILON.46	OWF56429.1	Protein_O-mannosyl-transferase_2__[Mizuhopecten_yessoensis]	sp|Q29IL2|POMT2_DROPS	Protein_O-mannosyl-transferase_2_OS=Drosophila_pseudoobscura_pseudoobscura_OX=46245_GN=tw_PE=3_SV=1	myi:110447844	K00728_dolichyl-phosphate-mannose-protein_mannosyltransferase_[EC:2.4.1.109]_|_(RefSeq)_protein_O-mannosyl-transferase_2-like_(A)	NO
HiC_scaffold_3	6732270	intergenic_region	NA	6682311	6710035	evm.model.000132F_PILON.46	OWF56429.1	Protein_O-mannosyl-transferase_2__[Mizuhopecten_yessoensis]	sp|Q29IL2|POMT2_DROPS	Protein_O-mannosyl-transferase_2_OS=Drosophila_pseudoobscura_pseudoobscura_OX=46245_GN=tw_PE=3_SV=1	myi:110447844	K00728_dolichyl-phosphate-mannose-protein_mannosyltransferase_[EC:2.4.1.109]_|_(RefSeq)_protein_O-mannosyl-transferase_2-like_(A)	NO
HiC_scaffold_3	6732249	intergenic_region	NA	6682311	6710035	evm.model.000132F_PILON.46	OWF56429.1	Protein_O-mannosyl-transferase_2__[Mizuhopecten_yessoensis]	sp|Q29IL2|POMT2_DROPS	Protein_O-mannosyl-transferase_2_OS=Drosophila_pseudoobscura_pseudoobscura_OX=46245_GN=tw_PE=3_SV=1	myi:110447844	K00728_dolichyl-phosphate-mannose-protein_mannosyltransferase_[EC:2.4.1.109]_|_(RefSeq)_protein_O-mannosyl-transferase_2-like_(A)	NO
HiC_scaffold_3	6747420	downstream_gene_variant	NA	6682311	6710035	evm.model.000132F_PILON.46	OWF56429.1	Protein_O-mannosyl-transferase_2__[Mizuhopecten_yessoensis]	sp|Q29IL2|POMT2_DROPS	Protein_O-mannosyl-transferase_2_OS=Drosophila_pseudoobscura_pseudoobscura_OX=46245_GN=tw_PE=3_SV=1	myi:110447844	K00728_dolichyl-phosphate-mannose-protein_mannosyltransferase_[EC:2.4.1.109]_|_(RefSeq)_protein_O-mannosyl-transferase_2-like_(A)	NO
HiC_scaffold_3	6771231	intron_variant	NA	6769014	7027528	evm.model.000132F_PILON.33	QBB01734.1	Calmodulin-A,_partial__[Cotesia_chilonis]	sp|P62154|CALM_LOCMI	Calmodulin_OS=Locusta_migratoria_OX=7004_PE=1_SV=2	pgc:109854805	K02183_calmodulin_|_(RefSeq)_calmodulin_(A)	YES
HiC_scaffold_3	6790694	intron_variant	NA	6769014	7027528	evm.model.000132F_PILON.33	QBB01734.1	Calmodulin-A,_partial__[Cotesia_chilonis]	sp|P62154|CALM_LOCMI	Calmodulin_OS=Locusta_migratoria_OX=7004_PE=1_SV=2	pgc:109854805	K02183_calmodulin_|_(RefSeq)_calmodulin_(A)	YES
HiC_scaffold_3	6790703	intron_variant	NA	6769014	7027528	evm.model.000132F_PILON.33	QBB01734.1	Calmodulin-A,_partial__[Cotesia_chilonis]	sp|P62154|CALM_LOCMI	Calmodulin_OS=Locusta_migratoria_OX=7004_PE=1_SV=2	pgc:109854805	K02183_calmodulin_|_(RefSeq)_calmodulin_(A)	YES
HiC_scaffold_3	7432898	downstream_gene_variant	NA	7391493	7416140	evm.model.000132F_PILON.10	XP_019616091.1	PREDICTED:_calmodulin-like_protein_12__[Branchiostoma_belcheri]	sp|Q8STF0|CALM_STRIE	Calmodulin_OS=Strongylocentrotus_intermedius_OX=7667_PE=2_SV=3	aqu:100633336	K02183_calmodulin_|_(RefSeq)_LOW_QUALITY_PROTEIN:_calmodulin-like_protein_12_(A)	NO
HiC_scaffold_3	7432900	downstream_gene_variant	NA	7391493	7416140	evm.model.000132F_PILON.10	XP_019616091.1	PREDICTED:_calmodulin-like_protein_12__[Branchiostoma_belcheri]	sp|Q8STF0|CALM_STRIE	Calmodulin_OS=Strongylocentrotus_intermedius_OX=7667_PE=2_SV=3	aqu:100633336	K02183_calmodulin_|_(RefSeq)_LOW_QUALITY_PROTEIN:_calmodulin-like_protein_12_(A)	NO
HiC_scaffold_3	7432901	downstream_gene_variant	NA	7391493	7416140	evm.model.000132F_PILON.10	XP_019616091.1	PREDICTED:_calmodulin-like_protein_12__[Branchiostoma_belcheri]	sp|Q8STF0|CALM_STRIE	Calmodulin_OS=Strongylocentrotus_intermedius_OX=7667_PE=2_SV=3	aqu:100633336	K02183_calmodulin_|_(RefSeq)_LOW_QUALITY_PROTEIN:_calmodulin-like_protein_12_(A)	NO
HiC_scaffold_3	7432860	downstream_gene_variant	NA	7391493	7416140	evm.model.000132F_PILON.10	XP_019616091.1	PREDICTED:_calmodulin-like_protein_12__[Branchiostoma_belcheri]	sp|Q8STF0|CALM_STRIE	Calmodulin_OS=Strongylocentrotus_intermedius_OX=7667_PE=2_SV=3	aqu:100633336	K02183_calmodulin_|_(RefSeq)_LOW_QUALITY_PROTEIN:_calmodulin-like_protein_12_(A)	NO
HiC_scaffold_3	7498904	intron_variant	NA	7436369	7507382	evm.model.000132F_PILON.7	XP_029205908.1	calmodulin__[Acropora_millepora]	sp|Q95NR9|CALM_METSE	Calmodulin_OS=Metridium_senile_OX=6116_PE=1_SV=3	adf:107343607	K02183_calmodulin_|_(RefSeq)_calmodulin_(A)	YES
HiC_scaffold_3	7928488	upstream_gene_variant	NA	7857715	7905183	evm.model.000436F_PILON.29	XP_021353618.1	hypoxia-inducible_factor_1-alpha-like_isoform_X1__[Mizuhopecten_yessoensis]	sp|Q9YIB9|HIF1A_CHICK	Hypoxia-inducible_factor_1-alpha_OS=Gallus_gallus_OX=9031_GN=HIF1A_PE=2_SV=2	crg:105339544	K09095_hypoxia-inducible_factor_2_alpha_|_(RefSeq)_hypoxia-inducible_factor_1-alpha-like_(A)	NO
HiC_scaffold_3	7928485	upstream_gene_variant	NA	7857715	7905183	evm.model.000436F_PILON.29	XP_021353618.1	hypoxia-inducible_factor_1-alpha-like_isoform_X1__[Mizuhopecten_yessoensis]	sp|Q9YIB9|HIF1A_CHICK	Hypoxia-inducible_factor_1-alpha_OS=Gallus_gallus_OX=9031_GN=HIF1A_PE=2_SV=2	crg:105339544	K09095_hypoxia-inducible_factor_2_alpha_|_(RefSeq)_hypoxia-inducible_factor_1-alpha-like_(A)	NO
HiC_scaffold_3	7950453	intergenic_region	NA	7930008	7931187	evm.model.000436F_PILON.28	OWF50363.1	Glycoprotein_hormone_beta-5__[Mizuhopecten_yessoensis]	sp|A0A0F7YZI5|CTHB5_CONVC	Thyrostimulin_beta-5_subunit_OS=Conus_victoriae_OX=319920_PE=2_SV=1	NA	NA	NO
HiC_scaffold_3	7950475	intergenic_region	NA	7930008	7931187	evm.model.000436F_PILON.28	OWF50363.1	Glycoprotein_hormone_beta-5__[Mizuhopecten_yessoensis]	sp|A0A0F7YZI5|CTHB5_CONVC	Thyrostimulin_beta-5_subunit_OS=Conus_victoriae_OX=319920_PE=2_SV=1	NA	NA	NO
HiC_scaffold_3	7950411	intergenic_region	NA	7930008	7931187	evm.model.000436F_PILON.28	OWF50363.1	Glycoprotein_hormone_beta-5__[Mizuhopecten_yessoensis]	sp|A0A0F7YZI5|CTHB5_CONVC	Thyrostimulin_beta-5_subunit_OS=Conus_victoriae_OX=319920_PE=2_SV=1	NA	NA	NO
HiC_scaffold_3	7976601	intergenic_region	NA	7956370	7964561	evm.model.000436F_PILON.27	XP_021353724.1	thyrostimulin_alpha-2_subunit-like__[Mizuhopecten_yessoensis]	sp|A0A0F7Z3J2|CTHA2_CONVC	Thyrostimulin_alpha-2_subunit_OS=Conus_victoriae_OX=319920_PE=1_SV=1	NA	NA	NO
HiC_scaffold_3	7990625	intergenic_region	NA	7956370	7964561	evm.model.000436F_PILON.27	XP_021353724.1	thyrostimulin_alpha-2_subunit-like__[Mizuhopecten_yessoensis]	sp|A0A0F7Z3J2|CTHA2_CONVC	Thyrostimulin_alpha-2_subunit_OS=Conus_victoriae_OX=319920_PE=1_SV=1	NA	NA	NO
HiC_scaffold_3	7990631	intergenic_region	NA	7956370	7964561	evm.model.000436F_PILON.27	XP_021353724.1	thyrostimulin_alpha-2_subunit-like__[Mizuhopecten_yessoensis]	sp|A0A0F7Z3J2|CTHA2_CONVC	Thyrostimulin_alpha-2_subunit_OS=Conus_victoriae_OX=319920_PE=1_SV=1	NA	NA	NO
HiC_scaffold_3	7990611	intergenic_region	NA	7956370	7964561	evm.model.000436F_PILON.27	XP_021353724.1	thyrostimulin_alpha-2_subunit-like__[Mizuhopecten_yessoensis]	sp|A0A0F7Z3J2|CTHA2_CONVC	Thyrostimulin_alpha-2_subunit_OS=Conus_victoriae_OX=319920_PE=1_SV=1	NA	NA	NO
HiC_scaffold_3	7990605	intergenic_region	NA	7956370	7964561	evm.model.000436F_PILON.27	XP_021353724.1	thyrostimulin_alpha-2_subunit-like__[Mizuhopecten_yessoensis]	sp|A0A0F7Z3J2|CTHA2_CONVC	Thyrostimulin_alpha-2_subunit_OS=Conus_victoriae_OX=319920_PE=1_SV=1	NA	NA	NO
HiC_scaffold_3	9241038	intergenic_region	NA	9226136	9233273	evm.model.000077F_PILON.9	XP_021353684.1	zinc_transporter_ZIP14-like__[Mizuhopecten_yessoensis]	sp|Q5FVQ0|S39A8_RAT	Zinc_transporter_ZIP8_OS=Rattus_norvegicus_OX=10116_GN=Slc39a8_PE=2_SV=1	myi:110445450	K14714_solute_carrier_family_39_(zinc_transporter),_member_8_|_(RefSeq)_zinc_transporter_ZIP8-like_(A)	NO
HiC_scaffold_3	9258079	intron_variant	NA	9256660	9301746	evm.model.000077F_PILON.10	XP_021353686.1	cilia-_and_flagella-associated_protein_61-like_isoform_X2__[Mizuhopecten_yessoensis]	sp|Q8NHU2|CFA61_HUMAN	Cilia-_and_flagella-associated_protein_61_OS=Homo_sapiens_OX=9606_GN=CFAP61_PE=2_SV=3	pif:PITG_18373	K00939_adenylate_kinase_[EC:2.7.4.3]_|_(RefSeq)_adenylate_kinase,_putative_(A)	YES
HiC_scaffold_3	9274036	intron_variant	NA	9256660	9301746	evm.model.000077F_PILON.10	XP_021353686.1	cilia-_and_flagella-associated_protein_61-like_isoform_X2__[Mizuhopecten_yessoensis]	sp|Q8NHU2|CFA61_HUMAN	Cilia-_and_flagella-associated_protein_61_OS=Homo_sapiens_OX=9606_GN=CFAP61_PE=2_SV=3	pif:PITG_18373	K00939_adenylate_kinase_[EC:2.7.4.3]_|_(RefSeq)_adenylate_kinase,_putative_(A)	YES
HiC_scaffold_3	9274032	intron_variant	NA	9256660	9301746	evm.model.000077F_PILON.10	XP_021353686.1	cilia-_and_flagella-associated_protein_61-like_isoform_X2__[Mizuhopecten_yessoensis]	sp|Q8NHU2|CFA61_HUMAN	Cilia-_and_flagella-associated_protein_61_OS=Homo_sapiens_OX=9606_GN=CFAP61_PE=2_SV=3	pif:PITG_18373	K00939_adenylate_kinase_[EC:2.7.4.3]_|_(RefSeq)_adenylate_kinase,_putative_(A)	YES
HiC_scaffold_3	9298492	intron_variant	NA	9256660	9301746	evm.model.000077F_PILON.10	XP_021353686.1	cilia-_and_flagella-associated_protein_61-like_isoform_X2__[Mizuhopecten_yessoensis]	sp|Q8NHU2|CFA61_HUMAN	Cilia-_and_flagella-associated_protein_61_OS=Homo_sapiens_OX=9606_GN=CFAP61_PE=2_SV=3	pif:PITG_18373	K00939_adenylate_kinase_[EC:2.7.4.3]_|_(RefSeq)_adenylate_kinase,_putative_(A)	YES
HiC_scaffold_3	9298503	intron_variant	NA	9256660	9301746	evm.model.000077F_PILON.10	XP_021353686.1	cilia-_and_flagella-associated_protein_61-like_isoform_X2__[Mizuhopecten_yessoensis]	sp|Q8NHU2|CFA61_HUMAN	Cilia-_and_flagella-associated_protein_61_OS=Homo_sapiens_OX=9606_GN=CFAP61_PE=2_SV=3	pif:PITG_18373	K00939_adenylate_kinase_[EC:2.7.4.3]_|_(RefSeq)_adenylate_kinase,_putative_(A)	YES
HiC_scaffold_3	9298509	intron_variant	NA	9256660	9301746	evm.model.000077F_PILON.10	XP_021353686.1	cilia-_and_flagella-associated_protein_61-like_isoform_X2__[Mizuhopecten_yessoensis]	sp|Q8NHU2|CFA61_HUMAN	Cilia-_and_flagella-associated_protein_61_OS=Homo_sapiens_OX=9606_GN=CFAP61_PE=2_SV=3	pif:PITG_18373	K00939_adenylate_kinase_[EC:2.7.4.3]_|_(RefSeq)_adenylate_kinase,_putative_(A)	YES
HiC_scaffold_3	9336366	intergenic_region	NA	9306590	9318790	evm.model.000077F_PILON.11	XP_011416206.1	PREDICTED:_crooked_neck-like_protein_1__[Crassostrea_gigas]	sp|Q9BZJ0|CRNL1_HUMAN	Crooked_neck-like_protein_1_OS=Homo_sapiens_OX=9606_GN=CRNKL1_PE=1_SV=4	crg:105320107	K12869_crooked_neck_|_(RefSeq)_crooked_neck-like_protein_1_(A)	NO
HiC_scaffold_3	9336383	intergenic_region	NA	9306590	9318790	evm.model.000077F_PILON.11	XP_011416206.1	PREDICTED:_crooked_neck-like_protein_1__[Crassostrea_gigas]	sp|Q9BZJ0|CRNL1_HUMAN	Crooked_neck-like_protein_1_OS=Homo_sapiens_OX=9606_GN=CRNKL1_PE=1_SV=4	crg:105320107	K12869_crooked_neck_|_(RefSeq)_crooked_neck-like_protein_1_(A)	NO
HiC_scaffold_3	9378113	intron_variant	NA	9372887	9424754	evm.model.000077F_PILON.16	XP_021353694.1	N-alpha-acetyltransferase_20-like__[Mizuhopecten_yessoensis]	sp|Q6P632|NAA20_XENTR	N-alpha-acetyltransferase_20_OS=Xenopus_tropicalis_OX=8364_GN=naa20_PE=2_SV=1	lak:106165390	K17972_N-terminal_acetyltransferase_B_complex_catalytic_subunit_[EC:2.3.1.254]_|_(RefSeq)_N-alpha-acetyltransferase_20-like_(A)	YES
HiC_scaffold_3	9378129	intron_variant	NA	9372887	9424754	evm.model.000077F_PILON.16	XP_021353694.1	N-alpha-acetyltransferase_20-like__[Mizuhopecten_yessoensis]	sp|Q6P632|NAA20_XENTR	N-alpha-acetyltransferase_20_OS=Xenopus_tropicalis_OX=8364_GN=naa20_PE=2_SV=1	lak:106165390	K17972_N-terminal_acetyltransferase_B_complex_catalytic_subunit_[EC:2.3.1.254]_|_(RefSeq)_N-alpha-acetyltransferase_20-like_(A)	YES
HiC_scaffold_3	9392838	intron_variant	NA	9372887	9424754	evm.model.000077F_PILON.16	XP_021353694.1	N-alpha-acetyltransferase_20-like__[Mizuhopecten_yessoensis]	sp|Q6P632|NAA20_XENTR	N-alpha-acetyltransferase_20_OS=Xenopus_tropicalis_OX=8364_GN=naa20_PE=2_SV=1	lak:106165390	K17972_N-terminal_acetyltransferase_B_complex_catalytic_subunit_[EC:2.3.1.254]_|_(RefSeq)_N-alpha-acetyltransferase_20-like_(A)	YES
HiC_scaffold_3	9392798	intron_variant	NA	9372887	9424754	evm.model.000077F_PILON.16	XP_021353694.1	N-alpha-acetyltransferase_20-like__[Mizuhopecten_yessoensis]	sp|Q6P632|NAA20_XENTR	N-alpha-acetyltransferase_20_OS=Xenopus_tropicalis_OX=8364_GN=naa20_PE=2_SV=1	lak:106165390	K17972_N-terminal_acetyltransferase_B_complex_catalytic_subunit_[EC:2.3.1.254]_|_(RefSeq)_N-alpha-acetyltransferase_20-like_(A)	YES
HiC_scaffold_3	9392796	intron_variant	NA	9372887	9424754	evm.model.000077F_PILON.16	XP_021353694.1	N-alpha-acetyltransferase_20-like__[Mizuhopecten_yessoensis]	sp|Q6P632|NAA20_XENTR	N-alpha-acetyltransferase_20_OS=Xenopus_tropicalis_OX=8364_GN=naa20_PE=2_SV=1	lak:106165390	K17972_N-terminal_acetyltransferase_B_complex_catalytic_subunit_[EC:2.3.1.254]_|_(RefSeq)_N-alpha-acetyltransferase_20-like_(A)	YES
HiC_scaffold_3	9392768	intron_variant	NA	9372887	9424754	evm.model.000077F_PILON.16	XP_021353694.1	N-alpha-acetyltransferase_20-like__[Mizuhopecten_yessoensis]	sp|Q6P632|NAA20_XENTR	N-alpha-acetyltransferase_20_OS=Xenopus_tropicalis_OX=8364_GN=naa20_PE=2_SV=1	lak:106165390	K17972_N-terminal_acetyltransferase_B_complex_catalytic_subunit_[EC:2.3.1.254]_|_(RefSeq)_N-alpha-acetyltransferase_20-like_(A)	YES
HiC_scaffold_3	9392767	intron_variant	NA	9372887	9424754	evm.model.000077F_PILON.16	XP_021353694.1	N-alpha-acetyltransferase_20-like__[Mizuhopecten_yessoensis]	sp|Q6P632|NAA20_XENTR	N-alpha-acetyltransferase_20_OS=Xenopus_tropicalis_OX=8364_GN=naa20_PE=2_SV=1	lak:106165390	K17972_N-terminal_acetyltransferase_B_complex_catalytic_subunit_[EC:2.3.1.254]_|_(RefSeq)_N-alpha-acetyltransferase_20-like_(A)	YES
HiC_scaffold_3	9709104	intron_variant	NA	9692264	9720327	evm.model.000077F_PILON.22	XP_021361781.1	reticulon-1-A-like_isoform_X2__[Mizuhopecten_yessoensis]	sp|Q9JK11|RTN4_RAT	Reticulon-4_OS=Rattus_norvegicus_OX=10116_GN=Rtn4_PE=1_SV=1	myi:110455753	K20721_reticulon-1_|_(RefSeq)_reticulon-1-A-like_isoform_X1_(A)	YES
HiC_scaffold_3	9709093	intron_variant	NA	9692264	9720327	evm.model.000077F_PILON.22	XP_021361781.1	reticulon-1-A-like_isoform_X2__[Mizuhopecten_yessoensis]	sp|Q9JK11|RTN4_RAT	Reticulon-4_OS=Rattus_norvegicus_OX=10116_GN=Rtn4_PE=1_SV=1	myi:110455753	K20721_reticulon-1_|_(RefSeq)_reticulon-1-A-like_isoform_X1_(A)	YES
HiC_scaffold_3	9730151	intron_variant	NA	9720661	9734662	evm.model.000077F_PILON.23	XP_021361742.1	serine_palmitoyltransferase_2-like__[Mizuhopecten_yessoensis]	sp|P97363|SPTC2_MOUSE	Serine_palmitoyltransferase_2_OS=Mus_musculus_OX=10090_GN=Sptlc2_PE=1_SV=2	myi:110455733	K00654_serine_palmitoyltransferase_[EC:2.3.1.50]_|_(RefSeq)_serine_palmitoyltransferase_2-like_(A)	YES
HiC_scaffold_3	9730164	intron_variant	NA	9720661	9734662	evm.model.000077F_PILON.23	XP_021361742.1	serine_palmitoyltransferase_2-like__[Mizuhopecten_yessoensis]	sp|P97363|SPTC2_MOUSE	Serine_palmitoyltransferase_2_OS=Mus_musculus_OX=10090_GN=Sptlc2_PE=1_SV=2	myi:110455733	K00654_serine_palmitoyltransferase_[EC:2.3.1.50]_|_(RefSeq)_serine_palmitoyltransferase_2-like_(A)	YES
HiC_scaffold_3	9730172	intron_variant	NA	9720661	9734662	evm.model.000077F_PILON.23	XP_021361742.1	serine_palmitoyltransferase_2-like__[Mizuhopecten_yessoensis]	sp|P97363|SPTC2_MOUSE	Serine_palmitoyltransferase_2_OS=Mus_musculus_OX=10090_GN=Sptlc2_PE=1_SV=2	myi:110455733	K00654_serine_palmitoyltransferase_[EC:2.3.1.50]_|_(RefSeq)_serine_palmitoyltransferase_2-like_(A)	YES
HiC_scaffold_3	9737926	downstream_gene_variant	NA	9720661	9734662	evm.model.000077F_PILON.23	XP_021361742.1	serine_palmitoyltransferase_2-like__[Mizuhopecten_yessoensis]	sp|P97363|SPTC2_MOUSE	Serine_palmitoyltransferase_2_OS=Mus_musculus_OX=10090_GN=Sptlc2_PE=1_SV=2	myi:110455733	K00654_serine_palmitoyltransferase_[EC:2.3.1.50]_|_(RefSeq)_serine_palmitoyltransferase_2-like_(A)	NO
HiC_scaffold_3	9737922	downstream_gene_variant	NA	9720661	9734662	evm.model.000077F_PILON.23	XP_021361742.1	serine_palmitoyltransferase_2-like__[Mizuhopecten_yessoensis]	sp|P97363|SPTC2_MOUSE	Serine_palmitoyltransferase_2_OS=Mus_musculus_OX=10090_GN=Sptlc2_PE=1_SV=2	myi:110455733	K00654_serine_palmitoyltransferase_[EC:2.3.1.50]_|_(RefSeq)_serine_palmitoyltransferase_2-like_(A)	NO
HiC_scaffold_3	9738149	downstream_gene_variant	NA	9720661	9734662	evm.model.000077F_PILON.23	XP_021361742.1	serine_palmitoyltransferase_2-like__[Mizuhopecten_yessoensis]	sp|P97363|SPTC2_MOUSE	Serine_palmitoyltransferase_2_OS=Mus_musculus_OX=10090_GN=Sptlc2_PE=1_SV=2	myi:110455733	K00654_serine_palmitoyltransferase_[EC:2.3.1.50]_|_(RefSeq)_serine_palmitoyltransferase_2-like_(A)	NO
HiC_scaffold_3	11305083	downstream_gene_variant	NA	11288886	11301240	evm.model.000350F_PILON.2	XP_021367634.1	uncharacterized_protein_LOC110459612__[Mizuhopecten_yessoensis]	sp|Q567Z6|CRIPT_DANRE	Cysteine-rich_PDZ-binding_protein_OS=Danio_rerio_OX=7955_GN=cript_PE=3_SV=1	NA	NA	NO
HiC_scaffold_3	11305015	downstream_gene_variant	NA	11288886	11301240	evm.model.000350F_PILON.2	XP_021367634.1	uncharacterized_protein_LOC110459612__[Mizuhopecten_yessoensis]	sp|Q567Z6|CRIPT_DANRE	Cysteine-rich_PDZ-binding_protein_OS=Danio_rerio_OX=7955_GN=cript_PE=3_SV=1	NA	NA	NO
HiC_scaffold_3	11318644	intron_variant	NA	11312525	11326794	evm.model.000350F_PILON.3	OWF43523.1	Ras-related_protein_Rab-15__[Mizuhopecten_yessoensis]	sp|P35289|RAB15_RAT	Ras-related_protein_Rab-15_OS=Rattus_norvegicus_OX=10116_GN=Rab15_PE=2_SV=1	myi:110459613	K07908_Ras-related_protein_Rab-15_|_(RefSeq)_ras-related_protein_Rab-10-like_isoform_X1_(A)	YES
HiC_scaffold_3	11348366	intron_variant	NA	11336352	11354989	evm.model.000350F_PILON.4	OWF43522.1	WD_repeat-containing_protein_20__[Mizuhopecten_yessoensis]	sp|Q8TBZ3|WDR20_HUMAN	WD_repeat-containing_protein_20_OS=Homo_sapiens_OX=9606_GN=WDR20_PE=1_SV=2	aam:106490508	K06100_symplekin_|_(RefSeq)_SYMPK;_symplekin_(A)	YES
HiC_scaffold_3	11348365	intron_variant	NA	11336352	11354989	evm.model.000350F_PILON.4	OWF43522.1	WD_repeat-containing_protein_20__[Mizuhopecten_yessoensis]	sp|Q8TBZ3|WDR20_HUMAN	WD_repeat-containing_protein_20_OS=Homo_sapiens_OX=9606_GN=WDR20_PE=1_SV=2	aam:106490508	K06100_symplekin_|_(RefSeq)_SYMPK;_symplekin_(A)	YES
HiC_scaffold_3	11348364	intron_variant	NA	11336352	11354989	evm.model.000350F_PILON.4	OWF43522.1	WD_repeat-containing_protein_20__[Mizuhopecten_yessoensis]	sp|Q8TBZ3|WDR20_HUMAN	WD_repeat-containing_protein_20_OS=Homo_sapiens_OX=9606_GN=WDR20_PE=1_SV=2	aam:106490508	K06100_symplekin_|_(RefSeq)_SYMPK;_symplekin_(A)	YES
HiC_scaffold_3	12909926	intron_variant	NA	12895996	12924803	evm.model.000648F_PILON.19	XP_022332113.1	serine/threonine-protein_phosphatase_2A_56_kDa_regulatory_subunit_alpha_isoform-like__[Crassostrea_virginica]	sp|Q6PD03|2A5A_MOUSE	Serine/threonine-protein_phosphatase_2A_56_kDa_regulatory_subunit_alpha_isoform_OS=Mus_musculus_OX=10090_GN=Ppp2r5a_PE=1_SV=1	myi:110447435	K11584_serine/threonine-protein_phosphatase_2A_regulatory_subunit_B'_|_(RefSeq)_serine/threonine-protein_phosphatase_2A_56_kDa_regulatory_subunit_alpha_isoform-like_(A)	YES
HiC_scaffold_3	12921706	intron_variant	NA	12895996	12924803	evm.model.000648F_PILON.19	XP_022332113.1	serine/threonine-protein_phosphatase_2A_56_kDa_regulatory_subunit_alpha_isoform-like__[Crassostrea_virginica]	sp|Q6PD03|2A5A_MOUSE	Serine/threonine-protein_phosphatase_2A_56_kDa_regulatory_subunit_alpha_isoform_OS=Mus_musculus_OX=10090_GN=Ppp2r5a_PE=1_SV=1	myi:110447435	K11584_serine/threonine-protein_phosphatase_2A_regulatory_subunit_B'_|_(RefSeq)_serine/threonine-protein_phosphatase_2A_56_kDa_regulatory_subunit_alpha_isoform-like_(A)	YES
HiC_scaffold_3	12935141	intergenic_region	NA	12928693	12929073	evm.model.000648F_PILON.21	PLW27511.1	hypothetical_protein_PCANC_27705,_partial__[Puccinia_coronata_var._avenae_f._sp._avenae]	NA	NA	NA	NA	NO
HiC_scaffold_3	12935135	intergenic_region	NA	12928693	12929073	evm.model.000648F_PILON.21	PLW27511.1	hypothetical_protein_PCANC_27705,_partial__[Puccinia_coronata_var._avenae_f._sp._avenae]	NA	NA	NA	NA	NO
HiC_scaffold_3	12935134	intergenic_region	NA	12928693	12929073	evm.model.000648F_PILON.21	PLW27511.1	hypothetical_protein_PCANC_27705,_partial__[Puccinia_coronata_var._avenae_f._sp._avenae]	NA	NA	NA	NA	NO
HiC_scaffold_3	12953132	missense_variant	MODERATE	12953057	12956578	evm.model.000648F_PILON.24	XP_021348808.1	mitochondrial_import_receptor_subunit_TOM20_homolog__[Mizuhopecten_yessoensis]	sp|Q6DFM9|TOM20_XENTR	Mitochondrial_import_receptor_subunit_TOM20_homolog_OS=Xenopus_tropicalis_OX=8364_GN=tomm20_PE=2_SV=1	myi:110447437	K17770_mitochondrial_import_receptor_subunit_TOM20_|_(RefSeq)_mitochondrial_import_receptor_subunit_TOM20_homolog_(A)	YES
HiC_scaffold_3	12960505	downstream_gene_variant	NA	12953057	12956578	evm.model.000648F_PILON.24	XP_021348808.1	mitochondrial_import_receptor_subunit_TOM20_homolog__[Mizuhopecten_yessoensis]	sp|Q6DFM9|TOM20_XENTR	Mitochondrial_import_receptor_subunit_TOM20_homolog_OS=Xenopus_tropicalis_OX=8364_GN=tomm20_PE=2_SV=1	myi:110447437	K17770_mitochondrial_import_receptor_subunit_TOM20_|_(RefSeq)_mitochondrial_import_receptor_subunit_TOM20_homolog_(A)	NO
HiC_scaffold_3	12960486	downstream_gene_variant	NA	12953057	12956578	evm.model.000648F_PILON.24	XP_021348808.1	mitochondrial_import_receptor_subunit_TOM20_homolog__[Mizuhopecten_yessoensis]	sp|Q6DFM9|TOM20_XENTR	Mitochondrial_import_receptor_subunit_TOM20_homolog_OS=Xenopus_tropicalis_OX=8364_GN=tomm20_PE=2_SV=1	myi:110447437	K17770_mitochondrial_import_receptor_subunit_TOM20_|_(RefSeq)_mitochondrial_import_receptor_subunit_TOM20_homolog_(A)	NO
HiC_scaffold_7	45017940	intergenic_region	NA	44937242	44970244	evm.model.000026F_PILON.129	XP_021341817.1	testin-like__[Mizuhopecten_yessoensis]	sp|Q90YH9|TES_CHICK	Testin_OS=Gallus_gallus_OX=9031_GN=TES_PE=2_SV=1	nve:NEMVE_v1g79617	K04511_prickle_|_(RefSeq)_hypothetical_protein_(A)	NO
HiC_scaffold_7	45017938	intergenic_region	NA	44937242	44970244	evm.model.000026F_PILON.129	XP_021341817.1	testin-like__[Mizuhopecten_yessoensis]	sp|Q90YH9|TES_CHICK	Testin_OS=Gallus_gallus_OX=9031_GN=TES_PE=2_SV=1	nve:NEMVE_v1g79617	K04511_prickle_|_(RefSeq)_hypothetical_protein_(A)	NO
HiC_scaffold_7	45070705	intergenic_region	NA	44937242	44970244	evm.model.000026F_PILON.129	XP_021341817.1	testin-like__[Mizuhopecten_yessoensis]	sp|Q90YH9|TES_CHICK	Testin_OS=Gallus_gallus_OX=9031_GN=TES_PE=2_SV=1	nve:NEMVE_v1g79617	K04511_prickle_|_(RefSeq)_hypothetical_protein_(A)	NO
HiC_scaffold_7	45070699	intergenic_region	NA	44937242	44970244	evm.model.000026F_PILON.129	XP_021341817.1	testin-like__[Mizuhopecten_yessoensis]	sp|Q90YH9|TES_CHICK	Testin_OS=Gallus_gallus_OX=9031_GN=TES_PE=2_SV=1	nve:NEMVE_v1g79617	K04511_prickle_|_(RefSeq)_hypothetical_protein_(A)	NO
HiC_scaffold_7	45070768	intergenic_region	NA	44937242	44970244	evm.model.000026F_PILON.129	XP_021341817.1	testin-like__[Mizuhopecten_yessoensis]	sp|Q90YH9|TES_CHICK	Testin_OS=Gallus_gallus_OX=9031_GN=TES_PE=2_SV=1	nve:NEMVE_v1g79617	K04511_prickle_|_(RefSeq)_hypothetical_protein_(A)	NO
HiC_scaffold_7	45079922	intergenic_region	NA	44937242	44970244	evm.model.000026F_PILON.129	XP_021341817.1	testin-like__[Mizuhopecten_yessoensis]	sp|Q90YH9|TES_CHICK	Testin_OS=Gallus_gallus_OX=9031_GN=TES_PE=2_SV=1	nve:NEMVE_v1g79617	K04511_prickle_|_(RefSeq)_hypothetical_protein_(A)	NO
HiC_scaffold_7	45079916	intergenic_region	NA	44937242	44970244	evm.model.000026F_PILON.129	XP_021341817.1	testin-like__[Mizuhopecten_yessoensis]	sp|Q90YH9|TES_CHICK	Testin_OS=Gallus_gallus_OX=9031_GN=TES_PE=2_SV=1	nve:NEMVE_v1g79617	K04511_prickle_|_(RefSeq)_hypothetical_protein_(A)	NO
HiC_scaffold_7	45091621	3_prime_UTR_variant	NA	45089224	45120737	evm.model.000026F_PILON.125	XP_021364176.1	microphthalmia-associated_transcription_factor-like_isoform_X2__[Mizuhopecten_yessoensis]	sp|Q08874|MITF_MOUSE	Microphthalmia-associated_transcription_factor_OS=Mus_musculus_OX=10090_GN=Mitf_PE=1_SV=4	myi:110457295	K09455_microphthalmia-associated_transcription_factor_|_(RefSeq)_microphthalmia-associated_transcription_factor-like_isoform_X1_(A)	YES
HiC_scaffold_7	45096512	missense_variant	MODERATE	45089224	45120737	evm.model.000026F_PILON.125	XP_021364176.1	microphthalmia-associated_transcription_factor-like_isoform_X2__[Mizuhopecten_yessoensis]	sp|Q08874|MITF_MOUSE	Microphthalmia-associated_transcription_factor_OS=Mus_musculus_OX=10090_GN=Mitf_PE=1_SV=4	myi:110457295	K09455_microphthalmia-associated_transcription_factor_|_(RefSeq)_microphthalmia-associated_transcription_factor-like_isoform_X1_(A)	YES
HiC_scaffold_7	45402323	synonymous_variant	LOW	45385616	45440971	evm.model.000026F_PILON.112	XP_021341821.1	dynein_heavy_chain_12,_axonemal-like_isoform_X1__[Mizuhopecten_yessoensis]	sp|Q63170|DYH7_RAT	Dynein_heavy_chain_7,_axonemal_OS=Rattus_norvegicus_OX=10116_GN=Dnah7_PE=2_SV=2	myi:110442503	K10408_dynein_heavy_chain,_axonemal_|_(RefSeq)_dynein_heavy_chain_12,_axonemal-like_isoform_X1_(A)	YES
HiC_scaffold_7	45419557	intron_variant	NA	45385616	45440971	evm.model.000026F_PILON.112	XP_021341821.1	dynein_heavy_chain_12,_axonemal-like_isoform_X1__[Mizuhopecten_yessoensis]	sp|Q63170|DYH7_RAT	Dynein_heavy_chain_7,_axonemal_OS=Rattus_norvegicus_OX=10116_GN=Dnah7_PE=2_SV=2	myi:110442503	K10408_dynein_heavy_chain,_axonemal_|_(RefSeq)_dynein_heavy_chain_12,_axonemal-like_isoform_X1_(A)	YES
HiC_scaffold_7	45456924	intron_variant	NA	45451377	45529640	evm.model.000026F_PILON.111	XP_021341828.1	calcium/calmodulin-dependent_protein_kinase_type_1-like__[Mizuhopecten_yessoensis]	sp|W0LYS5|CAMKI_MACNP	Calcium/calmodulin-dependent_protein_kinase_type_1_OS=Macrobrachium_nipponense_OX=159736_GN=CaMKI_PE=2_SV=1	crg:105340286	K08794_calcium/calmodulin-dependent_protein_kinase_I_[EC:2.7.11.17]_|_(RefSeq)_calcium/calmodulin-dependent_protein_kinase_type_1_(A)	YES
HiC_scaffold_7	45456902	intron_variant	NA	45451377	45529640	evm.model.000026F_PILON.111	XP_021341828.1	calcium/calmodulin-dependent_protein_kinase_type_1-like__[Mizuhopecten_yessoensis]	sp|W0LYS5|CAMKI_MACNP	Calcium/calmodulin-dependent_protein_kinase_type_1_OS=Macrobrachium_nipponense_OX=159736_GN=CaMKI_PE=2_SV=1	crg:105340286	K08794_calcium/calmodulin-dependent_protein_kinase_I_[EC:2.7.11.17]_|_(RefSeq)_calcium/calmodulin-dependent_protein_kinase_type_1_(A)	YES
HiC_scaffold_7	45457990	intron_variant	NA	45451377	45529640	evm.model.000026F_PILON.111	XP_021341828.1	calcium/calmodulin-dependent_protein_kinase_type_1-like__[Mizuhopecten_yessoensis]	sp|W0LYS5|CAMKI_MACNP	Calcium/calmodulin-dependent_protein_kinase_type_1_OS=Macrobrachium_nipponense_OX=159736_GN=CaMKI_PE=2_SV=1	crg:105340286	K08794_calcium/calmodulin-dependent_protein_kinase_I_[EC:2.7.11.17]_|_(RefSeq)_calcium/calmodulin-dependent_protein_kinase_type_1_(A)	YES
HiC_scaffold_7	45478348	intron_variant	NA	45451377	45529640	evm.model.000026F_PILON.111	XP_021341828.1	calcium/calmodulin-dependent_protein_kinase_type_1-like__[Mizuhopecten_yessoensis]	sp|W0LYS5|CAMKI_MACNP	Calcium/calmodulin-dependent_protein_kinase_type_1_OS=Macrobrachium_nipponense_OX=159736_GN=CaMKI_PE=2_SV=1	crg:105340286	K08794_calcium/calmodulin-dependent_protein_kinase_I_[EC:2.7.11.17]_|_(RefSeq)_calcium/calmodulin-dependent_protein_kinase_type_1_(A)	YES
HiC_scaffold_9	17010923	upstream_gene_variant	NA	17009739	17012325	evm.model.000630F_PILON.55	XP_021360548.1	ARL14_effector_protein-like_isoform_X2__[Mizuhopecten_yessoensis]	sp|Q5EA92|AL14E_BOVIN	ARL14_effector_protein_OS=Bos_taurus_OX=9913_GN=ARL14EP_PE=2_SV=1	nai:NECAME_00531	K15272_solute_carrier_family_35_(UDP-sugar_transporter),_member_A1/2/3_|_(RefSeq)_UDP-galactose_transporter_(A)	YES
HiC_scaffold_9	17017808	3_prime_UTR_variant	NA	17012414	17020316	evm.model.000630F_PILON.54	XP_021360586.1	uncharacterized_protein_LOC110455027__[Mizuhopecten_yessoensis]	NA	NA	NA	NA	YES
HiC_scaffold_9	17028806	upstream_gene_variant	NA	17012414	17020316	evm.model.000630F_PILON.54	XP_021360586.1	uncharacterized_protein_LOC110455027__[Mizuhopecten_yessoensis]	NA	NA	NA	NA	NO
HiC_scaffold_9	17051439	intron_variant	NA	17029747	17070093	evm.model.000630F_PILON.53	XP_021360537.1	protein_4.1-like_isoform_X1__[Mizuhopecten_yessoensis]	sp|Q9WV92|E41L3_MOUSE	Band_4.1-like_protein_3_OS=Mus_musculus_OX=10090_GN=Epb41l3_PE=1_SV=1	myi:110454997	K06107_erythrocyte_membrane_protein_band_4.1_|_(RefSeq)_protein_4.1-like_isoform_X1_(A)	YES
HiC_scaffold_9	17069344	3_prime_UTR_variant	NA	17029747	17070093	evm.model.000630F_PILON.53	XP_021360537.1	protein_4.1-like_isoform_X1__[Mizuhopecten_yessoensis]	sp|Q9WV92|E41L3_MOUSE	Band_4.1-like_protein_3_OS=Mus_musculus_OX=10090_GN=Epb41l3_PE=1_SV=1	myi:110454997	K06107_erythrocyte_membrane_protein_band_4.1_|_(RefSeq)_protein_4.1-like_isoform_X1_(A)	YES
HiC_scaffold_9	17079379	upstream_gene_variant	NA	17070356	17076058	evm.model.000630F_PILON.52	XP_021360550.1	pyroglutamyl-peptidase_1-like__[Mizuhopecten_yessoensis]	sp|Q9ESW8|PGPI_MOUSE	Pyroglutamyl-peptidase_1_OS=Mus_musculus_OX=10090_GN=Pgpep1_PE=1_SV=1	myi:110455007	K01304_pyroglutamyl-peptidase_[EC:3.4.19.3]_|_(RefSeq)_pyroglutamyl-peptidase_1-like_(A)	NO
HiC_scaffold_9	17094897	intergenic_region	NA	17070356	17076058	evm.model.000630F_PILON.52	XP_021360550.1	pyroglutamyl-peptidase_1-like__[Mizuhopecten_yessoensis]	sp|Q9ESW8|PGPI_MOUSE	Pyroglutamyl-peptidase_1_OS=Mus_musculus_OX=10090_GN=Pgpep1_PE=1_SV=1	myi:110455007	K01304_pyroglutamyl-peptidase_[EC:3.4.19.3]_|_(RefSeq)_pyroglutamyl-peptidase_1-like_(A)	NO
HiC_scaffold_9	17094856	intergenic_region	NA	17070356	17076058	evm.model.000630F_PILON.52	XP_021360550.1	pyroglutamyl-peptidase_1-like__[Mizuhopecten_yessoensis]	sp|Q9ESW8|PGPI_MOUSE	Pyroglutamyl-peptidase_1_OS=Mus_musculus_OX=10090_GN=Pgpep1_PE=1_SV=1	myi:110455007	K01304_pyroglutamyl-peptidase_[EC:3.4.19.3]_|_(RefSeq)_pyroglutamyl-peptidase_1-like_(A)	NO
HiC_scaffold_9	17412071	intron_variant	NA	17398963	17415791	evm.model.000630F_PILON.38	XP_011417725.1	PREDICTED:_molybdopterin_synthase_catalytic_subunit__[Crassostrea_gigas]	sp|O96007|MOC2B_HUMAN	Molybdopterin_synthase_catalytic_subunit_OS=Homo_sapiens_OX=9606_GN=MOCS2_PE=1_SV=1	crg:105321186	K03635_molybdopterin_synthase_catalytic_subunit_[EC:2.8.1.12]_|_(RefSeq)_molybdopterin_synthase_catalytic_subunit_(A)	YES
HiC_scaffold_9	17469643	intron_variant	NA	17458208	17472429	evm.model.000630F_PILON.33	OLP91748.1	Histone-lysine_N-methyltransferase_SMYD3__[Symbiodinium_microadriaticum]	NA	NA	epa:110250615	K18626_trichohyalin_|_(RefSeq)_trichohyalin-like_(A)	YES
HiC_scaffold_9	17492638	intron_variant	NA	17474776	17497680	evm.model.000630F_PILON.32	XP_021360598.1	uncharacterized_protein_LOC110455033__[Mizuhopecten_yessoensis]	NA	NA	NA	NA	YES
HiC_scaffold_9	17492649	intron_variant	NA	17474776	17497680	evm.model.000630F_PILON.32	XP_021360598.1	uncharacterized_protein_LOC110455033__[Mizuhopecten_yessoensis]	NA	NA	NA	NA	YES
HiC_scaffold_9	17492614	intron_variant	NA	17474776	17497680	evm.model.000630F_PILON.32	XP_021360598.1	uncharacterized_protein_LOC110455033__[Mizuhopecten_yessoensis]	NA	NA	NA	NA	YES
HiC_scaffold_9	17492601	intron_variant	NA	17474776	17497680	evm.model.000630F_PILON.32	XP_021360598.1	uncharacterized_protein_LOC110455033__[Mizuhopecten_yessoensis]	NA	NA	NA	NA	YES
HiC_scaffold_9	17958787	missense_variant	MODERATE	17957195	17960812	evm.model.000425F_PILON.39	XP_021360567.1	laccase_domain-containing_protein_1-like__[Mizuhopecten_yessoensis]	sp|Q8BZT9|LACC1_MOUSE	Laccase_domain-containing_protein_1_OS=Mus_musculus_OX=10090_GN=Lacc1_PE=1_SV=1	myi:110455014	K05810_polyphenol_oxidase_[EC:1.10.3.-]_|_(RefSeq)_laccase_domain-containing_protein_1-like_(A)	YES
HiC_scaffold_9	17971952	intron_variant	NA	17966135	17974040	evm.model.000425F_PILON.37	XP_021360564.1	uncharacterized_protein_LOC110455013__[Mizuhopecten_yessoensis]	NA	NA	bfo:BRAFLDRAFT_130981	K13163_male-specific_lethal_1_|_(RefSeq)_hypothetical_protein_(A)	YES
HiC_scaffold_9	17982033	intergenic_region	NA	17966135	17974040	evm.model.000425F_PILON.37	XP_021360564.1	uncharacterized_protein_LOC110455013__[Mizuhopecten_yessoensis]	NA	NA	bfo:BRAFLDRAFT_130981	K13163_male-specific_lethal_1_|_(RefSeq)_hypothetical_protein_(A)	NO
HiC_scaffold_9	17982049	intergenic_region	NA	17966135	17974040	evm.model.000425F_PILON.37	XP_021360564.1	uncharacterized_protein_LOC110455013__[Mizuhopecten_yessoensis]	NA	NA	bfo:BRAFLDRAFT_130981	K13163_male-specific_lethal_1_|_(RefSeq)_hypothetical_protein_(A)	NO
HiC_scaffold_9	17981995	intergenic_region	NA	17966135	17974040	evm.model.000425F_PILON.37	XP_021360564.1	uncharacterized_protein_LOC110455013__[Mizuhopecten_yessoensis]	NA	NA	bfo:BRAFLDRAFT_130981	K13163_male-specific_lethal_1_|_(RefSeq)_hypothetical_protein_(A)	NO
HiC_scaffold_9	17981991	intergenic_region	NA	17966135	17974040	evm.model.000425F_PILON.37	XP_021360564.1	uncharacterized_protein_LOC110455013__[Mizuhopecten_yessoensis]	NA	NA	bfo:BRAFLDRAFT_130981	K13163_male-specific_lethal_1_|_(RefSeq)_hypothetical_protein_(A)	NO
HiC_scaffold_9	17989754	intron_variant	NA	17988488	18002673	evm.model.000425F_PILON.36	XP_021360518.1	thiamin_pyrophosphokinase_1-like_isoform_X1__[Mizuhopecten_yessoensis]	sp|Q9H3S4|TPK1_HUMAN	Thiamin_pyrophosphokinase_1_OS=Homo_sapiens_OX=9606_GN=TPK1_PE=1_SV=1	myi:110454988	K00949_thiamine_pyrophosphokinase_[EC:2.7.6.2]_|_(RefSeq)_thiamin_pyrophosphokinase_1-like_isoform_X1_(A)	YES
HiC_scaffold_9	17989755	intron_variant	NA	17988488	18002673	evm.model.000425F_PILON.36	XP_021360518.1	thiamin_pyrophosphokinase_1-like_isoform_X1__[Mizuhopecten_yessoensis]	sp|Q9H3S4|TPK1_HUMAN	Thiamin_pyrophosphokinase_1_OS=Homo_sapiens_OX=9606_GN=TPK1_PE=1_SV=1	myi:110454988	K00949_thiamine_pyrophosphokinase_[EC:2.7.6.2]_|_(RefSeq)_thiamin_pyrophosphokinase_1-like_isoform_X1_(A)	YES
HiC_scaffold_9	18111300	splice_region_variant&intron_variant	LOW	18107963	18113874	evm.model.000425F_PILON.29	XP_021360478.1	telomere_repeats-binding_bouquet_formation_protein_2-like_isoform_X1__[Mizuhopecten_yessoensis]	sp|Q5BJD2|TERB2_DANRE	Telomere_repeats-binding_bouquet_formation_protein_2_OS=Danio_rerio_OX=7955_GN=terb2_PE=2_SV=1	aml:100470239	K12034_tripartite_motif-containing_protein_69_[EC:2.3.2.27]_|_(RefSeq)_TERB2;_telomere_repeat_binding_bouquet_formation_protein_2_(A)	YES
HiC_scaffold_9	18122849	downstream_gene_variant	NA	18114148	18120810	evm.model.000425F_PILON.28	XP_021360511.1	methyl-CpG-binding_domain_protein_2-like_isoform_X1__[Mizuhopecten_yessoensis]	sp|Q9UBB5|MBD2_HUMAN	Methyl-CpG-binding_domain_protein_2_OS=Homo_sapiens_OX=9606_GN=MBD2_PE=1_SV=1	myi:110454985	K11590_methyl-CpG-binding_domain_protein_2_|_(RefSeq)_methyl-CpG-binding_domain_protein_2-like_isoform_X1_(A)	NO
HiC_scaffold_9	18128397	downstream_gene_variant	NA	18127451	18130959	evm.model.000425F_PILON.27	XP_021360535.1	protein_disulfide-isomerase_A3-like__[Mizuhopecten_yessoensis]	sp|Q8JG64|PDIA3_CHICK	Protein_disulfide-isomerase_A3_OS=Gallus_gallus_OX=9031_GN=PDIA3_PE=2_SV=1	myi:110454995	K08056_protein_disulfide-isomerase_A3_[EC:5.3.4.1]_|_(RefSeq)_protein_disulfide-isomerase_A3-like_(A)	YES
HiC_scaffold_9	18183192	splice_region_variant&intron_variant	LOW	18183098	18189576	evm.model.000425F_PILON.19	XP_021360642.1	uncharacterized_protein_LOC110455050__[Mizuhopecten_yessoensis]	sp|A7M7C7|SKOR2_MOUSE	SKI_family_transcriptional_corepressor_2_OS=Mus_musculus_OX=10090_GN=Skor2_PE=1_SV=1	cmk:103185104	K18499_Ski-like_protein_|_(RefSeq)_skil;_SKI_like_proto-oncogene_(A)	YES
HiC_scaffold_9	18183216	downstream_gene_variant	NA	18183098	18189576	evm.model.000425F_PILON.19	XP_021360642.1	uncharacterized_protein_LOC110455050__[Mizuhopecten_yessoensis]	sp|A7M7C7|SKOR2_MOUSE	SKI_family_transcriptional_corepressor_2_OS=Mus_musculus_OX=10090_GN=Skor2_PE=1_SV=1	cmk:103185104	K18499_Ski-like_protein_|_(RefSeq)_skil;_SKI_like_proto-oncogene_(A)	YES
HiC_scaffold_9	18183217	downstream_gene_variant	NA	18183098	18189576	evm.model.000425F_PILON.19	XP_021360642.1	uncharacterized_protein_LOC110455050__[Mizuhopecten_yessoensis]	sp|A7M7C7|SKOR2_MOUSE	SKI_family_transcriptional_corepressor_2_OS=Mus_musculus_OX=10090_GN=Skor2_PE=1_SV=1	cmk:103185104	K18499_Ski-like_protein_|_(RefSeq)_skil;_SKI_like_proto-oncogene_(A)	YES
HiC_scaffold_9	18855333	intergenic_region	NA	18572161	18592060	evm.model.000425F_PILON.2	XP_021346167.1	neuropeptide_receptor_15-like__[Mizuhopecten_yessoensis]	sp|Q09638|NPR15_CAEEL	Neuropeptide_receptor_15_OS=Caenorhabditis_elegans_OX=6239_GN=npr-15_PE=2_SV=3	lgi:LOTGIDRAFT_62145	K04282_thyrotropin-releasing_hormone_receptor_|_(RefSeq)_hypothetical_protein_(A)	NO
HiC_scaffold_9	18863088	intergenic_region	NA	18572161	18592060	evm.model.000425F_PILON.2	XP_021346167.1	neuropeptide_receptor_15-like__[Mizuhopecten_yessoensis]	sp|Q09638|NPR15_CAEEL	Neuropeptide_receptor_15_OS=Caenorhabditis_elegans_OX=6239_GN=npr-15_PE=2_SV=3	lgi:LOTGIDRAFT_62145	K04282_thyrotropin-releasing_hormone_receptor_|_(RefSeq)_hypothetical_protein_(A)	NO
HiC_scaffold_9	18872746	intergenic_region	NA	18572161	18592060	evm.model.000425F_PILON.2	XP_021346167.1	neuropeptide_receptor_15-like__[Mizuhopecten_yessoensis]	sp|Q09638|NPR15_CAEEL	Neuropeptide_receptor_15_OS=Caenorhabditis_elegans_OX=6239_GN=npr-15_PE=2_SV=3	lgi:LOTGIDRAFT_62145	K04282_thyrotropin-releasing_hormone_receptor_|_(RefSeq)_hypothetical_protein_(A)	NO
HiC_scaffold_9	18872740	intergenic_region	NA	18572161	18592060	evm.model.000425F_PILON.2	XP_021346167.1	neuropeptide_receptor_15-like__[Mizuhopecten_yessoensis]	sp|Q09638|NPR15_CAEEL	Neuropeptide_receptor_15_OS=Caenorhabditis_elegans_OX=6239_GN=npr-15_PE=2_SV=3	lgi:LOTGIDRAFT_62145	K04282_thyrotropin-releasing_hormone_receptor_|_(RefSeq)_hypothetical_protein_(A)	NO
HiC_scaffold_9	18872737	intergenic_region	NA	18572161	18592060	evm.model.000425F_PILON.2	XP_021346167.1	neuropeptide_receptor_15-like__[Mizuhopecten_yessoensis]	sp|Q09638|NPR15_CAEEL	Neuropeptide_receptor_15_OS=Caenorhabditis_elegans_OX=6239_GN=npr-15_PE=2_SV=3	lgi:LOTGIDRAFT_62145	K04282_thyrotropin-releasing_hormone_receptor_|_(RefSeq)_hypothetical_protein_(A)	NO
HiC_scaffold_9	18884862	intergenic_region	NA	18572161	18592060	evm.model.000425F_PILON.2	XP_021346167.1	neuropeptide_receptor_15-like__[Mizuhopecten_yessoensis]	sp|Q09638|NPR15_CAEEL	Neuropeptide_receptor_15_OS=Caenorhabditis_elegans_OX=6239_GN=npr-15_PE=2_SV=3	lgi:LOTGIDRAFT_62145	K04282_thyrotropin-releasing_hormone_receptor_|_(RefSeq)_hypothetical_protein_(A)	NO
HiC_scaffold_9	18884849	intergenic_region	NA	18572161	18592060	evm.model.000425F_PILON.2	XP_021346167.1	neuropeptide_receptor_15-like__[Mizuhopecten_yessoensis]	sp|Q09638|NPR15_CAEEL	Neuropeptide_receptor_15_OS=Caenorhabditis_elegans_OX=6239_GN=npr-15_PE=2_SV=3	lgi:LOTGIDRAFT_62145	K04282_thyrotropin-releasing_hormone_receptor_|_(RefSeq)_hypothetical_protein_(A)	NO
HiC_scaffold_9	19146506	synonymous_variant	LOW	19136209	19152646	evm.model.000737F_PILON.32	XP_021368649.1	very_long-chain_acyl-CoA_synthetase-like__[Mizuhopecten_yessoensis]	sp|O14975|S27A2_HUMAN	Very_long-chain_acyl-CoA_synthetase_OS=Homo_sapiens_OX=9606_GN=SLC27A2_PE=1_SV=2	myi:110460193	K08749_solute_carrier_family_27_(fatty_acid_transporter),_member_6_|_(RefSeq)_very_long-chain_acyl-CoA_synthetase-like_(A)	YES
HiC_scaffold_9	19167731	upstream_gene_variant	NA	19155979	19165901	evm.model.000737F_PILON.31	XP_021368568.1	ubiquitin-conjugating_enzyme_E2_R2-like__[Mizuhopecten_yessoensis]	sp|P49427|UB2R1_HUMAN	Ubiquitin-conjugating_enzyme_E2_R1_OS=Homo_sapiens_OX=9606_GN=CDC34_PE=1_SV=2	myi:110460153	K02207_ubiquitin-conjugating_enzyme_E2_R_[EC:2.3.2.23]_|_(RefSeq)_ubiquitin-conjugating_enzyme_E2_R2-like_(A)	NO
HiC_scaffold_9	19179962	intron_variant	NA	19174108	19184786	evm.model.000737F_PILON.30	XP_021368567.1	tyrosine-protein_phosphatase_non-receptor_type_9-like__[Mizuhopecten_yessoensis]	sp|Q641Z2|PTN9_RAT	Tyrosine-protein_phosphatase_non-receptor_type_9_OS=Rattus_norvegicus_OX=10116_GN=Ptpn9_PE=2_SV=1	myi:110460152	K18038_tyrosine-protein_phosphatase_non-receptor_type_9_[EC:3.1.3.48]_|_(RefSeq)_tyrosine-protein_phosphatase_non-receptor_type_9-like_(A)	YES
HiC_scaffold_9	19188920	downstream_gene_variant	NA	19174108	19184786	evm.model.000737F_PILON.30	XP_021368567.1	tyrosine-protein_phosphatase_non-receptor_type_9-like__[Mizuhopecten_yessoensis]	sp|Q641Z2|PTN9_RAT	Tyrosine-protein_phosphatase_non-receptor_type_9_OS=Rattus_norvegicus_OX=10116_GN=Ptpn9_PE=2_SV=1	myi:110460152	K18038_tyrosine-protein_phosphatase_non-receptor_type_9_[EC:3.1.3.48]_|_(RefSeq)_tyrosine-protein_phosphatase_non-receptor_type_9-like_(A)	NO
HiC_scaffold_9	19188924	downstream_gene_variant	NA	19174108	19184786	evm.model.000737F_PILON.30	XP_021368567.1	tyrosine-protein_phosphatase_non-receptor_type_9-like__[Mizuhopecten_yessoensis]	sp|Q641Z2|PTN9_RAT	Tyrosine-protein_phosphatase_non-receptor_type_9_OS=Rattus_norvegicus_OX=10116_GN=Ptpn9_PE=2_SV=1	myi:110460152	K18038_tyrosine-protein_phosphatase_non-receptor_type_9_[EC:3.1.3.48]_|_(RefSeq)_tyrosine-protein_phosphatase_non-receptor_type_9-like_(A)	NO
HiC_scaffold_9	19188945	downstream_gene_variant	NA	19174108	19184786	evm.model.000737F_PILON.30	XP_021368567.1	tyrosine-protein_phosphatase_non-receptor_type_9-like__[Mizuhopecten_yessoensis]	sp|Q641Z2|PTN9_RAT	Tyrosine-protein_phosphatase_non-receptor_type_9_OS=Rattus_norvegicus_OX=10116_GN=Ptpn9_PE=2_SV=1	myi:110460152	K18038_tyrosine-protein_phosphatase_non-receptor_type_9_[EC:3.1.3.48]_|_(RefSeq)_tyrosine-protein_phosphatase_non-receptor_type_9-like_(A)	NO
HiC_scaffold_9	19188897	downstream_gene_variant	NA	19174108	19184786	evm.model.000737F_PILON.30	XP_021368567.1	tyrosine-protein_phosphatase_non-receptor_type_9-like__[Mizuhopecten_yessoensis]	sp|Q641Z2|PTN9_RAT	Tyrosine-protein_phosphatase_non-receptor_type_9_OS=Rattus_norvegicus_OX=10116_GN=Ptpn9_PE=2_SV=1	myi:110460152	K18038_tyrosine-protein_phosphatase_non-receptor_type_9_[EC:3.1.3.48]_|_(RefSeq)_tyrosine-protein_phosphatase_non-receptor_type_9-like_(A)	NO
HiC_scaffold_9	19188876	downstream_gene_variant	NA	19174108	19184786	evm.model.000737F_PILON.30	XP_021368567.1	tyrosine-protein_phosphatase_non-receptor_type_9-like__[Mizuhopecten_yessoensis]	sp|Q641Z2|PTN9_RAT	Tyrosine-protein_phosphatase_non-receptor_type_9_OS=Rattus_norvegicus_OX=10116_GN=Ptpn9_PE=2_SV=1	myi:110460152	K18038_tyrosine-protein_phosphatase_non-receptor_type_9_[EC:3.1.3.48]_|_(RefSeq)_tyrosine-protein_phosphatase_non-receptor_type_9-like_(A)	NO
HiC_scaffold_9	19196398	missense_variant	MODERATE	19194219	19200670	evm.model.000737F_PILON.29	XP_021368695.1	uncharacterized_protein_LOC110460217__[Mizuhopecten_yessoensis]	NA	NA	sgh:107601611	K12567_titin_[EC:2.7.11.1]_|_(RefSeq)_titin-like_(A)	YES
HiC_scaffold_9	24010572	intron_variant	NA	23985963	24158766	evm.model.000315F_PILON.43	XP_021358513.1	magnesium/proton_exchanger_1-like_isoform_X9__[Mizuhopecten_yessoensis]	sp|P57103|NAC3_HUMAN	Sodium/calcium_exchanger_3_OS=Homo_sapiens_OX=9606_GN=SLC8A3_PE=1_SV=2	lak:106179368	K05849_solute_carrier_family_8_(sodium/calcium_exchanger)_|_(RefSeq)_sodium/calcium_exchanger_2_isoform_X1_(A)	YES
HiC_scaffold_9	24010560	intron_variant	NA	23985963	24158766	evm.model.000315F_PILON.43	XP_021358513.1	magnesium/proton_exchanger_1-like_isoform_X9__[Mizuhopecten_yessoensis]	sp|P57103|NAC3_HUMAN	Sodium/calcium_exchanger_3_OS=Homo_sapiens_OX=9606_GN=SLC8A3_PE=1_SV=2	lak:106179368	K05849_solute_carrier_family_8_(sodium/calcium_exchanger)_|_(RefSeq)_sodium/calcium_exchanger_2_isoform_X1_(A)	YES
HiC_scaffold_9	24024701	intron_variant	NA	23985963	24158766	evm.model.000315F_PILON.43	XP_021358513.1	magnesium/proton_exchanger_1-like_isoform_X9__[Mizuhopecten_yessoensis]	sp|P57103|NAC3_HUMAN	Sodium/calcium_exchanger_3_OS=Homo_sapiens_OX=9606_GN=SLC8A3_PE=1_SV=2	lak:106179368	K05849_solute_carrier_family_8_(sodium/calcium_exchanger)_|_(RefSeq)_sodium/calcium_exchanger_2_isoform_X1_(A)	YES
HiC_scaffold_9	24024677	intron_variant	NA	23985963	24158766	evm.model.000315F_PILON.43	XP_021358513.1	magnesium/proton_exchanger_1-like_isoform_X9__[Mizuhopecten_yessoensis]	sp|P57103|NAC3_HUMAN	Sodium/calcium_exchanger_3_OS=Homo_sapiens_OX=9606_GN=SLC8A3_PE=1_SV=2	lak:106179368	K05849_solute_carrier_family_8_(sodium/calcium_exchanger)_|_(RefSeq)_sodium/calcium_exchanger_2_isoform_X1_(A)	YES
HiC_scaffold_9	24025294	intron_variant	NA	23985963	24158766	evm.model.000315F_PILON.43	XP_021358513.1	magnesium/proton_exchanger_1-like_isoform_X9__[Mizuhopecten_yessoensis]	sp|P57103|NAC3_HUMAN	Sodium/calcium_exchanger_3_OS=Homo_sapiens_OX=9606_GN=SLC8A3_PE=1_SV=2	lak:106179368	K05849_solute_carrier_family_8_(sodium/calcium_exchanger)_|_(RefSeq)_sodium/calcium_exchanger_2_isoform_X1_(A)	YES
HiC_scaffold_9	24059950	intron_variant	NA	23985963	24158766	evm.model.000315F_PILON.43	XP_021358513.1	magnesium/proton_exchanger_1-like_isoform_X9__[Mizuhopecten_yessoensis]	sp|P57103|NAC3_HUMAN	Sodium/calcium_exchanger_3_OS=Homo_sapiens_OX=9606_GN=SLC8A3_PE=1_SV=2	lak:106179368	K05849_solute_carrier_family_8_(sodium/calcium_exchanger)_|_(RefSeq)_sodium/calcium_exchanger_2_isoform_X1_(A)	YES
HiC_scaffold_10	17154404	intron_variant	NA	17138337	17172518	evm.model.000046F_PILON.50	XP_021342480.1	ankyrin_repeat_and_BTB/POZ_domain-containing_protein_1-like__[Mizuhopecten_yessoensis]	sp|Q99LJ2|ABTB1_MOUSE	Ankyrin_repeat_and_BTB/POZ_domain-containing_protein_1_OS=Mus_musculus_OX=10090_GN=Abtb1_PE=2_SV=1	myi:110442914	K10520_ankyrin_repeat_and_BTB/POZ_domain-containing_protein_1_|_(RefSeq)_ankyrin_repeat_and_BTB/POZ_domain-containing_protein_1-like_(A)	YES
HiC_scaffold_10	17154399	intron_variant	NA	17138337	17172518	evm.model.000046F_PILON.50	XP_021342480.1	ankyrin_repeat_and_BTB/POZ_domain-containing_protein_1-like__[Mizuhopecten_yessoensis]	sp|Q99LJ2|ABTB1_MOUSE	Ankyrin_repeat_and_BTB/POZ_domain-containing_protein_1_OS=Mus_musculus_OX=10090_GN=Abtb1_PE=2_SV=1	myi:110442914	K10520_ankyrin_repeat_and_BTB/POZ_domain-containing_protein_1_|_(RefSeq)_ankyrin_repeat_and_BTB/POZ_domain-containing_protein_1-like_(A)	YES
HiC_scaffold_10	17156359	intron_variant	NA	17138337	17172518	evm.model.000046F_PILON.50	XP_021342480.1	ankyrin_repeat_and_BTB/POZ_domain-containing_protein_1-like__[Mizuhopecten_yessoensis]	sp|Q99LJ2|ABTB1_MOUSE	Ankyrin_repeat_and_BTB/POZ_domain-containing_protein_1_OS=Mus_musculus_OX=10090_GN=Abtb1_PE=2_SV=1	myi:110442914	K10520_ankyrin_repeat_and_BTB/POZ_domain-containing_protein_1_|_(RefSeq)_ankyrin_repeat_and_BTB/POZ_domain-containing_protein_1-like_(A)	YES
HiC_scaffold_10	17168924	3_prime_UTR_variant	NA	17138337	17172518	evm.model.000046F_PILON.50	XP_021342480.1	ankyrin_repeat_and_BTB/POZ_domain-containing_protein_1-like__[Mizuhopecten_yessoensis]	sp|Q99LJ2|ABTB1_MOUSE	Ankyrin_repeat_and_BTB/POZ_domain-containing_protein_1_OS=Mus_musculus_OX=10090_GN=Abtb1_PE=2_SV=1	myi:110442914	K10520_ankyrin_repeat_and_BTB/POZ_domain-containing_protein_1_|_(RefSeq)_ankyrin_repeat_and_BTB/POZ_domain-containing_protein_1-like_(A)	YES
HiC_scaffold_10	17182287	upstream_gene_variant	NA	17172600	17180840	evm.model.000046F_PILON.51	XP_021342484.1	leucine-rich_repeat-containing_protein_72-like__[Mizuhopecten_yessoensis]	sp|A6NJI9|LRC72_HUMAN	Leucine-rich_repeat-containing_protein_72_OS=Homo_sapiens_OX=9606_GN=LRRC72_PE=2_SV=2	dpx:DAPPUDRAFT_242342	K16606_leucine-rich_repeat-containing_protein_49_|_(GenBank)_hypothetical_protein_(A)	NO
HiC_scaffold_10	17182272	upstream_gene_variant	NA	17172600	17180840	evm.model.000046F_PILON.51	XP_021342484.1	leucine-rich_repeat-containing_protein_72-like__[Mizuhopecten_yessoensis]	sp|A6NJI9|LRC72_HUMAN	Leucine-rich_repeat-containing_protein_72_OS=Homo_sapiens_OX=9606_GN=LRRC72_PE=2_SV=2	dpx:DAPPUDRAFT_242342	K16606_leucine-rich_repeat-containing_protein_49_|_(GenBank)_hypothetical_protein_(A)	NO
HiC_scaffold_10	17220070	intergenic_region	NA	17190273	17194238	evm.model.000046F_PILON.53	TAN49405.1	heme_utilization_protein__[Methylococcaceae_bacterium]	sp|G4SLH0|TTN1_CAEEL	Titin_homolog_OS=Caenorhabditis_elegans_OX=6239_GN=ttn-1_PE=1_SV=2	amex:103044103	K20093_DNA_excision_repair_protein_ERCC-6-like_[EC:3.6.4.12]_|_(RefSeq)_ercc6l;_DNA_excision_repair_protein_ERCC-6-like_(A)	NO
HiC_scaffold_10	17220091	intergenic_region	NA	17190273	17194238	evm.model.000046F_PILON.53	TAN49405.1	heme_utilization_protein__[Methylococcaceae_bacterium]	sp|G4SLH0|TTN1_CAEEL	Titin_homolog_OS=Caenorhabditis_elegans_OX=6239_GN=ttn-1_PE=1_SV=2	amex:103044103	K20093_DNA_excision_repair_protein_ERCC-6-like_[EC:3.6.4.12]_|_(RefSeq)_ercc6l;_DNA_excision_repair_protein_ERCC-6-like_(A)	NO
HiC_scaffold_10	17240489	intergenic_region	NA	17190273	17194238	evm.model.000046F_PILON.53	TAN49405.1	heme_utilization_protein__[Methylococcaceae_bacterium]	sp|G4SLH0|TTN1_CAEEL	Titin_homolog_OS=Caenorhabditis_elegans_OX=6239_GN=ttn-1_PE=1_SV=2	amex:103044103	K20093_DNA_excision_repair_protein_ERCC-6-like_[EC:3.6.4.12]_|_(RefSeq)_ercc6l;_DNA_excision_repair_protein_ERCC-6-like_(A)	NO
HiC_scaffold_10	17240462	intergenic_region	NA	17190273	17194238	evm.model.000046F_PILON.53	TAN49405.1	heme_utilization_protein__[Methylococcaceae_bacterium]	sp|G4SLH0|TTN1_CAEEL	Titin_homolog_OS=Caenorhabditis_elegans_OX=6239_GN=ttn-1_PE=1_SV=2	amex:103044103	K20093_DNA_excision_repair_protein_ERCC-6-like_[EC:3.6.4.12]_|_(RefSeq)_ercc6l;_DNA_excision_repair_protein_ERCC-6-like_(A)	NO
HiC_scaffold_10	17247134	intergenic_region	NA	17190273	17194238	evm.model.000046F_PILON.53	TAN49405.1	heme_utilization_protein__[Methylococcaceae_bacterium]	sp|G4SLH0|TTN1_CAEEL	Titin_homolog_OS=Caenorhabditis_elegans_OX=6239_GN=ttn-1_PE=1_SV=2	amex:103044103	K20093_DNA_excision_repair_protein_ERCC-6-like_[EC:3.6.4.12]_|_(RefSeq)_ercc6l;_DNA_excision_repair_protein_ERCC-6-like_(A)	NO
HiC_scaffold_10	17247119	intergenic_region	NA	17190273	17194238	evm.model.000046F_PILON.53	TAN49405.1	heme_utilization_protein__[Methylococcaceae_bacterium]	sp|G4SLH0|TTN1_CAEEL	Titin_homolog_OS=Caenorhabditis_elegans_OX=6239_GN=ttn-1_PE=1_SV=2	amex:103044103	K20093_DNA_excision_repair_protein_ERCC-6-like_[EC:3.6.4.12]_|_(RefSeq)_ercc6l;_DNA_excision_repair_protein_ERCC-6-like_(A)	NO
HiC_scaffold_10	17260065	intergenic_region	NA	17190273	17194238	evm.model.000046F_PILON.53	TAN49405.1	heme_utilization_protein__[Methylococcaceae_bacterium]	sp|G4SLH0|TTN1_CAEEL	Titin_homolog_OS=Caenorhabditis_elegans_OX=6239_GN=ttn-1_PE=1_SV=2	amex:103044103	K20093_DNA_excision_repair_protein_ERCC-6-like_[EC:3.6.4.12]_|_(RefSeq)_ercc6l;_DNA_excision_repair_protein_ERCC-6-like_(A)	NO
HiC_scaffold_10	17260008	intergenic_region	NA	17190273	17194238	evm.model.000046F_PILON.53	TAN49405.1	heme_utilization_protein__[Methylococcaceae_bacterium]	sp|G4SLH0|TTN1_CAEEL	Titin_homolog_OS=Caenorhabditis_elegans_OX=6239_GN=ttn-1_PE=1_SV=2	amex:103044103	K20093_DNA_excision_repair_protein_ERCC-6-like_[EC:3.6.4.12]_|_(RefSeq)_ercc6l;_DNA_excision_repair_protein_ERCC-6-like_(A)	NO
HiC_scaffold_10	17269644	intergenic_region	NA	17190273	17194238	evm.model.000046F_PILON.53	TAN49405.1	heme_utilization_protein__[Methylococcaceae_bacterium]	sp|G4SLH0|TTN1_CAEEL	Titin_homolog_OS=Caenorhabditis_elegans_OX=6239_GN=ttn-1_PE=1_SV=2	amex:103044103	K20093_DNA_excision_repair_protein_ERCC-6-like_[EC:3.6.4.12]_|_(RefSeq)_ercc6l;_DNA_excision_repair_protein_ERCC-6-like_(A)	NO
HiC_scaffold_10	17269656	intergenic_region	NA	17190273	17194238	evm.model.000046F_PILON.53	TAN49405.1	heme_utilization_protein__[Methylococcaceae_bacterium]	sp|G4SLH0|TTN1_CAEEL	Titin_homolog_OS=Caenorhabditis_elegans_OX=6239_GN=ttn-1_PE=1_SV=2	amex:103044103	K20093_DNA_excision_repair_protein_ERCC-6-like_[EC:3.6.4.12]_|_(RefSeq)_ercc6l;_DNA_excision_repair_protein_ERCC-6-like_(A)	NO
HiC_scaffold_10	17269592	intergenic_region	NA	17190273	17194238	evm.model.000046F_PILON.53	TAN49405.1	heme_utilization_protein__[Methylococcaceae_bacterium]	sp|G4SLH0|TTN1_CAEEL	Titin_homolog_OS=Caenorhabditis_elegans_OX=6239_GN=ttn-1_PE=1_SV=2	amex:103044103	K20093_DNA_excision_repair_protein_ERCC-6-like_[EC:3.6.4.12]_|_(RefSeq)_ercc6l;_DNA_excision_repair_protein_ERCC-6-like_(A)	NO
HiC_scaffold_10	17269591	intergenic_region	NA	17190273	17194238	evm.model.000046F_PILON.53	TAN49405.1	heme_utilization_protein__[Methylococcaceae_bacterium]	sp|G4SLH0|TTN1_CAEEL	Titin_homolog_OS=Caenorhabditis_elegans_OX=6239_GN=ttn-1_PE=1_SV=2	amex:103044103	K20093_DNA_excision_repair_protein_ERCC-6-like_[EC:3.6.4.12]_|_(RefSeq)_ercc6l;_DNA_excision_repair_protein_ERCC-6-like_(A)	NO
HiC_scaffold_10	17520262	intron_variant	NA	17503885	17530942	evm.model.000046F_PILON.81	XP_021342479.1	uncharacterized_protein_LOC110442913_isoform_X7__[Mizuhopecten_yessoensis]	NA	NA	NA	NA	YES
HiC_scaffold_10	17520247	intron_variant	NA	17503885	17530942	evm.model.000046F_PILON.81	XP_021342479.1	uncharacterized_protein_LOC110442913_isoform_X7__[Mizuhopecten_yessoensis]	NA	NA	NA	NA	YES
HiC_scaffold_10	17545408	intergenic_region	NA	17503885	17530942	evm.model.000046F_PILON.81	XP_021342479.1	uncharacterized_protein_LOC110442913_isoform_X7__[Mizuhopecten_yessoensis]	NA	NA	NA	NA	NO
HiC_scaffold_10	17545705	intergenic_region	NA	17503885	17530942	evm.model.000046F_PILON.81	XP_021342479.1	uncharacterized_protein_LOC110442913_isoform_X7__[Mizuhopecten_yessoensis]	NA	NA	NA	NA	NO
HiC_scaffold_10	17555852	intergenic_region	NA	17503885	17530942	evm.model.000046F_PILON.81	XP_021342479.1	uncharacterized_protein_LOC110442913_isoform_X7__[Mizuhopecten_yessoensis]	NA	NA	NA	NA	NO
HiC_scaffold_10	17859227	intergenic_region	NA	17784776	17847245	evm.model.000046F_PILON.91	XP_021342441.1	hemicentin-1-like__[Mizuhopecten_yessoensis]	sp|Q8NDA2|HMCN2_HUMAN	Hemicentin-2_OS=Homo_sapiens_OX=9606_GN=HMCN2_PE=2_SV=3	myi:110442903	K17341_hemicentin_|_(RefSeq)_hemicentin-1-like_(A)	NO
HiC_scaffold_10	17859202	intergenic_region	NA	17784776	17847245	evm.model.000046F_PILON.91	XP_021342441.1	hemicentin-1-like__[Mizuhopecten_yessoensis]	sp|Q8NDA2|HMCN2_HUMAN	Hemicentin-2_OS=Homo_sapiens_OX=9606_GN=HMCN2_PE=2_SV=3	myi:110442903	K17341_hemicentin_|_(RefSeq)_hemicentin-1-like_(A)	NO
HiC_scaffold_10	17866067	downstream_gene_variant	NA	17784776	17847245	evm.model.000046F_PILON.91	XP_021342441.1	hemicentin-1-like__[Mizuhopecten_yessoensis]	sp|Q8NDA2|HMCN2_HUMAN	Hemicentin-2_OS=Homo_sapiens_OX=9606_GN=HMCN2_PE=2_SV=3	myi:110442903	K17341_hemicentin_|_(RefSeq)_hemicentin-1-like_(A)	NO
HiC_scaffold_10	17866079	downstream_gene_variant	NA	17784776	17847245	evm.model.000046F_PILON.91	XP_021342441.1	hemicentin-1-like__[Mizuhopecten_yessoensis]	sp|Q8NDA2|HMCN2_HUMAN	Hemicentin-2_OS=Homo_sapiens_OX=9606_GN=HMCN2_PE=2_SV=3	myi:110442903	K17341_hemicentin_|_(RefSeq)_hemicentin-1-like_(A)	NO
HiC_scaffold_10	17866082	downstream_gene_variant	NA	17784776	17847245	evm.model.000046F_PILON.91	XP_021342441.1	hemicentin-1-like__[Mizuhopecten_yessoensis]	sp|Q8NDA2|HMCN2_HUMAN	Hemicentin-2_OS=Homo_sapiens_OX=9606_GN=HMCN2_PE=2_SV=3	myi:110442903	K17341_hemicentin_|_(RefSeq)_hemicentin-1-like_(A)	NO
HiC_scaffold_10	17866037	downstream_gene_variant	NA	17784776	17847245	evm.model.000046F_PILON.91	XP_021342441.1	hemicentin-1-like__[Mizuhopecten_yessoensis]	sp|Q8NDA2|HMCN2_HUMAN	Hemicentin-2_OS=Homo_sapiens_OX=9606_GN=HMCN2_PE=2_SV=3	myi:110442903	K17341_hemicentin_|_(RefSeq)_hemicentin-1-like_(A)	NO
HiC_scaffold_10	17866027	downstream_gene_variant	NA	17784776	17847245	evm.model.000046F_PILON.91	XP_021342441.1	hemicentin-1-like__[Mizuhopecten_yessoensis]	sp|Q8NDA2|HMCN2_HUMAN	Hemicentin-2_OS=Homo_sapiens_OX=9606_GN=HMCN2_PE=2_SV=3	myi:110442903	K17341_hemicentin_|_(RefSeq)_hemicentin-1-like_(A)	NO
HiC_scaffold_10	17866018	downstream_gene_variant	NA	17784776	17847245	evm.model.000046F_PILON.91	XP_021342441.1	hemicentin-1-like__[Mizuhopecten_yessoensis]	sp|Q8NDA2|HMCN2_HUMAN	Hemicentin-2_OS=Homo_sapiens_OX=9606_GN=HMCN2_PE=2_SV=3	myi:110442903	K17341_hemicentin_|_(RefSeq)_hemicentin-1-like_(A)	NO
HiC_scaffold_10	18001402	5_prime_UTR_variant	NA	18001356	18023913	evm.model.000046F_PILON.108	XP_021338912.1	NADH-cytochrome_b5_reductase_3-like_isoform_X2__[Mizuhopecten_yessoensis]	sp|Q5BJ68|NB5R2_XENTR	NADH-cytochrome_b5_reductase_2_OS=Xenopus_tropicalis_OX=8364_GN=cyb5r2_PE=2_SV=1	myi:110440265	K00326_cytochrome-b5_reductase_[EC:1.6.2.2]_|_(RefSeq)_NADH-cytochrome_b5_reductase_3-like_isoform_X1_(A)	YES
HiC_scaffold_10	18032824	5_prime_UTR_variant	NA	18031892	18044888	evm.model.000046F_PILON.110	XP_013394893.1	NAD-dependent_protein_deacylase__[Lingula_anatina]	sp|E2RDZ6|SIR5_CANLF	NAD-dependent_protein_deacylase_sirtuin-5,_mitochondrial_OS=Canis_lupus_familiaris_OX=9615_GN=SIRT5_PE=3_SV=1	lak:106162228	K11415_NAD-dependent_deacetylase_sirtuin_5_[EC:3.5.1.-]_|_(RefSeq)_NAD-dependent_protein_deacylase_(A)	YES
HiC_scaffold_10	18074434	synonymous_variant	LOW	18067259	18080143	evm.model.000046F_PILON.112	XP_021338935.1	uncharacterized_protein_LOC110440287__[Mizuhopecten_yessoensis]	NA	NA	NA	NA	YES
HiC_scaffold_10	18081294	upstream_gene_variant	NA	18067259	18080143	evm.model.000046F_PILON.112	XP_021338935.1	uncharacterized_protein_LOC110440287__[Mizuhopecten_yessoensis]	NA	NA	NA	NA	NO
HiC_scaffold_10	18081516	upstream_gene_variant	NA	18067259	18080143	evm.model.000046F_PILON.112	XP_021338935.1	uncharacterized_protein_LOC110440287__[Mizuhopecten_yessoensis]	NA	NA	NA	NA	NO
HiC_scaffold_10	18570795	downstream_gene_variant	NA	18536376	18543509	evm.model.000449F_PILON.22	XP_021371369.1	uncharacterized_protein_LOC110461951__[Mizuhopecten_yessoensis]	sp|Q5N870|DCL3A_ORYSJ	Endoribonuclease_Dicer_homolog_3a_OS=Oryza_sativa_subsp._japonica_OX=39947_GN=DCL3A_PE=2_SV=1	pdam:113678531	K11699_RNA-dependent_RNA_polymerase_[EC:2.7.7.48]_|_(RefSeq)_uncharacterized_protein_LOC113678531_(A)	NO
HiC_scaffold_10	18570788	downstream_gene_variant	NA	18536376	18543509	evm.model.000449F_PILON.22	XP_021371369.1	uncharacterized_protein_LOC110461951__[Mizuhopecten_yessoensis]	sp|Q5N870|DCL3A_ORYSJ	Endoribonuclease_Dicer_homolog_3a_OS=Oryza_sativa_subsp._japonica_OX=39947_GN=DCL3A_PE=2_SV=1	pdam:113678531	K11699_RNA-dependent_RNA_polymerase_[EC:2.7.7.48]_|_(RefSeq)_uncharacterized_protein_LOC113678531_(A)	NO
HiC_scaffold_10	18570768	downstream_gene_variant	NA	18536376	18543509	evm.model.000449F_PILON.22	XP_021371369.1	uncharacterized_protein_LOC110461951__[Mizuhopecten_yessoensis]	sp|Q5N870|DCL3A_ORYSJ	Endoribonuclease_Dicer_homolog_3a_OS=Oryza_sativa_subsp._japonica_OX=39947_GN=DCL3A_PE=2_SV=1	pdam:113678531	K11699_RNA-dependent_RNA_polymerase_[EC:2.7.7.48]_|_(RefSeq)_uncharacterized_protein_LOC113678531_(A)	NO
HiC_scaffold_10	18570884	downstream_gene_variant	NA	18536376	18543509	evm.model.000449F_PILON.22	XP_021371369.1	uncharacterized_protein_LOC110461951__[Mizuhopecten_yessoensis]	sp|Q5N870|DCL3A_ORYSJ	Endoribonuclease_Dicer_homolog_3a_OS=Oryza_sativa_subsp._japonica_OX=39947_GN=DCL3A_PE=2_SV=1	pdam:113678531	K11699_RNA-dependent_RNA_polymerase_[EC:2.7.7.48]_|_(RefSeq)_uncharacterized_protein_LOC113678531_(A)	NO
HiC_scaffold_10	18570893	downstream_gene_variant	NA	18536376	18543509	evm.model.000449F_PILON.22	XP_021371369.1	uncharacterized_protein_LOC110461951__[Mizuhopecten_yessoensis]	sp|Q5N870|DCL3A_ORYSJ	Endoribonuclease_Dicer_homolog_3a_OS=Oryza_sativa_subsp._japonica_OX=39947_GN=DCL3A_PE=2_SV=1	pdam:113678531	K11699_RNA-dependent_RNA_polymerase_[EC:2.7.7.48]_|_(RefSeq)_uncharacterized_protein_LOC113678531_(A)	NO
HiC_scaffold_10	21436796	intron_variant	NA	21434262	21444662	evm.model.000268F_PILON.26	RUS75942.1	hypothetical_protein_EGW08_016288,_partial__[Elysia_chlorotica]	sp|P9WI14|PPE24_MYCTO	Uncharacterized_PPE_family_protein_PPE24_OS=Mycobacterium_tuberculosis_(strain_CDC_1551_/_Oshkosh)_OX=83331_GN=PPE24_PE=3_SV=1	acun:113482111	K19673_tetratricopeptide_repeat_protein_21B_|_(RefSeq)_TTC21B;_tetratricopeptide_repeat_protein_21B_(A)	YES
HiC_scaffold_10	21436817	intron_variant	NA	21434262	21444662	evm.model.000268F_PILON.26	RUS75942.1	hypothetical_protein_EGW08_016288,_partial__[Elysia_chlorotica]	sp|P9WI14|PPE24_MYCTO	Uncharacterized_PPE_family_protein_PPE24_OS=Mycobacterium_tuberculosis_(strain_CDC_1551_/_Oshkosh)_OX=83331_GN=PPE24_PE=3_SV=1	acun:113482111	K19673_tetratricopeptide_repeat_protein_21B_|_(RefSeq)_TTC21B;_tetratricopeptide_repeat_protein_21B_(A)	YES
HiC_scaffold_10	21451142	intergenic_region	NA	21434262	21444662	evm.model.000268F_PILON.26	RUS75942.1	hypothetical_protein_EGW08_016288,_partial__[Elysia_chlorotica]	sp|P9WI14|PPE24_MYCTO	Uncharacterized_PPE_family_protein_PPE24_OS=Mycobacterium_tuberculosis_(strain_CDC_1551_/_Oshkosh)_OX=83331_GN=PPE24_PE=3_SV=1	acun:113482111	K19673_tetratricopeptide_repeat_protein_21B_|_(RefSeq)_TTC21B;_tetratricopeptide_repeat_protein_21B_(A)	NO
HiC_scaffold_10	21455486	intergenic_region	NA	21434262	21444662	evm.model.000268F_PILON.26	RUS75942.1	hypothetical_protein_EGW08_016288,_partial__[Elysia_chlorotica]	sp|P9WI14|PPE24_MYCTO	Uncharacterized_PPE_family_protein_PPE24_OS=Mycobacterium_tuberculosis_(strain_CDC_1551_/_Oshkosh)_OX=83331_GN=PPE24_PE=3_SV=1	acun:113482111	K19673_tetratricopeptide_repeat_protein_21B_|_(RefSeq)_TTC21B;_tetratricopeptide_repeat_protein_21B_(A)	NO
HiC_scaffold_10	21475904	intergenic_region	NA	21434262	21444662	evm.model.000268F_PILON.26	RUS75942.1	hypothetical_protein_EGW08_016288,_partial__[Elysia_chlorotica]	sp|P9WI14|PPE24_MYCTO	Uncharacterized_PPE_family_protein_PPE24_OS=Mycobacterium_tuberculosis_(strain_CDC_1551_/_Oshkosh)_OX=83331_GN=PPE24_PE=3_SV=1	acun:113482111	K19673_tetratricopeptide_repeat_protein_21B_|_(RefSeq)_TTC21B;_tetratricopeptide_repeat_protein_21B_(A)	NO
HiC_scaffold_10	21475875	intergenic_region	NA	21434262	21444662	evm.model.000268F_PILON.26	RUS75942.1	hypothetical_protein_EGW08_016288,_partial__[Elysia_chlorotica]	sp|P9WI14|PPE24_MYCTO	Uncharacterized_PPE_family_protein_PPE24_OS=Mycobacterium_tuberculosis_(strain_CDC_1551_/_Oshkosh)_OX=83331_GN=PPE24_PE=3_SV=1	acun:113482111	K19673_tetratricopeptide_repeat_protein_21B_|_(RefSeq)_TTC21B;_tetratricopeptide_repeat_protein_21B_(A)	NO
HiC_scaffold_10	21475868	intergenic_region	NA	21434262	21444662	evm.model.000268F_PILON.26	RUS75942.1	hypothetical_protein_EGW08_016288,_partial__[Elysia_chlorotica]	sp|P9WI14|PPE24_MYCTO	Uncharacterized_PPE_family_protein_PPE24_OS=Mycobacterium_tuberculosis_(strain_CDC_1551_/_Oshkosh)_OX=83331_GN=PPE24_PE=3_SV=1	acun:113482111	K19673_tetratricopeptide_repeat_protein_21B_|_(RefSeq)_TTC21B;_tetratricopeptide_repeat_protein_21B_(A)	NO
HiC_scaffold_10	21494299	intergenic_region	NA	21434262	21444662	evm.model.000268F_PILON.26	RUS75942.1	hypothetical_protein_EGW08_016288,_partial__[Elysia_chlorotica]	sp|P9WI14|PPE24_MYCTO	Uncharacterized_PPE_family_protein_PPE24_OS=Mycobacterium_tuberculosis_(strain_CDC_1551_/_Oshkosh)_OX=83331_GN=PPE24_PE=3_SV=1	acun:113482111	K19673_tetratricopeptide_repeat_protein_21B_|_(RefSeq)_TTC21B;_tetratricopeptide_repeat_protein_21B_(A)	NO
HiC_scaffold_10	21494291	intergenic_region	NA	21434262	21444662	evm.model.000268F_PILON.26	RUS75942.1	hypothetical_protein_EGW08_016288,_partial__[Elysia_chlorotica]	sp|P9WI14|PPE24_MYCTO	Uncharacterized_PPE_family_protein_PPE24_OS=Mycobacterium_tuberculosis_(strain_CDC_1551_/_Oshkosh)_OX=83331_GN=PPE24_PE=3_SV=1	acun:113482111	K19673_tetratricopeptide_repeat_protein_21B_|_(RefSeq)_TTC21B;_tetratricopeptide_repeat_protein_21B_(A)	NO
HiC_scaffold_10	21972834	intergenic_region	NA	21937425	21952640	evm.model.000268F_PILON.48	XP_021368144.1	cysteine_and_glycine-rich_protein_1-like__[Mizuhopecten_yessoensis]	sp|Q05158|CSRP2_COTJA	Cysteine_and_glycine-rich_protein_2_OS=Coturnix_japonica_OX=93934_GN=CSRP2_PE=1_SV=2	myi:110459941	K09377_cysteine_and_glycine-rich_protein_|_(RefSeq)_cysteine_and_glycine-rich_protein_1-like_(A)	NO
HiC_scaffold_10	21972855	intergenic_region	NA	21937425	21952640	evm.model.000268F_PILON.48	XP_021368144.1	cysteine_and_glycine-rich_protein_1-like__[Mizuhopecten_yessoensis]	sp|Q05158|CSRP2_COTJA	Cysteine_and_glycine-rich_protein_2_OS=Coturnix_japonica_OX=93934_GN=CSRP2_PE=1_SV=2	myi:110459941	K09377_cysteine_and_glycine-rich_protein_|_(RefSeq)_cysteine_and_glycine-rich_protein_1-like_(A)	NO
HiC_scaffold_10	21987241	intergenic_region	NA	21937425	21952640	evm.model.000268F_PILON.48	XP_021368144.1	cysteine_and_glycine-rich_protein_1-like__[Mizuhopecten_yessoensis]	sp|Q05158|CSRP2_COTJA	Cysteine_and_glycine-rich_protein_2_OS=Coturnix_japonica_OX=93934_GN=CSRP2_PE=1_SV=2	myi:110459941	K09377_cysteine_and_glycine-rich_protein_|_(RefSeq)_cysteine_and_glycine-rich_protein_1-like_(A)	NO
HiC_scaffold_10	21993125	intergenic_region	NA	21937425	21952640	evm.model.000268F_PILON.48	XP_021368144.1	cysteine_and_glycine-rich_protein_1-like__[Mizuhopecten_yessoensis]	sp|Q05158|CSRP2_COTJA	Cysteine_and_glycine-rich_protein_2_OS=Coturnix_japonica_OX=93934_GN=CSRP2_PE=1_SV=2	myi:110459941	K09377_cysteine_and_glycine-rich_protein_|_(RefSeq)_cysteine_and_glycine-rich_protein_1-like_(A)	NO
HiC_scaffold_10	21993099	intergenic_region	NA	21937425	21952640	evm.model.000268F_PILON.48	XP_021368144.1	cysteine_and_glycine-rich_protein_1-like__[Mizuhopecten_yessoensis]	sp|Q05158|CSRP2_COTJA	Cysteine_and_glycine-rich_protein_2_OS=Coturnix_japonica_OX=93934_GN=CSRP2_PE=1_SV=2	myi:110459941	K09377_cysteine_and_glycine-rich_protein_|_(RefSeq)_cysteine_and_glycine-rich_protein_1-like_(A)	NO
HiC_scaffold_10	21998255	intergenic_region	NA	21937425	21952640	evm.model.000268F_PILON.48	XP_021368144.1	cysteine_and_glycine-rich_protein_1-like__[Mizuhopecten_yessoensis]	sp|Q05158|CSRP2_COTJA	Cysteine_and_glycine-rich_protein_2_OS=Coturnix_japonica_OX=93934_GN=CSRP2_PE=1_SV=2	myi:110459941	K09377_cysteine_and_glycine-rich_protein_|_(RefSeq)_cysteine_and_glycine-rich_protein_1-like_(A)	NO
HiC_scaffold_10	22242385	intergenic_region	NA	22189526	22204580	evm.model.003017F_PILON.1	XP_021360895.1	myomodulin_neuropeptides_2-like__[Mizuhopecten_yessoensis]	sp|Q2VF17|MYOM2_APLCA	Myomodulin_neuropeptides_2_OS=Aplysia_californica_OX=6500_GN=MMG2_PE=1_SV=1	NA	NA	NO
HiC_scaffold_10	22242391	intergenic_region	NA	22189526	22204580	evm.model.003017F_PILON.1	XP_021360895.1	myomodulin_neuropeptides_2-like__[Mizuhopecten_yessoensis]	sp|Q2VF17|MYOM2_APLCA	Myomodulin_neuropeptides_2_OS=Aplysia_californica_OX=6500_GN=MMG2_PE=1_SV=1	NA	NA	NO
HiC_scaffold_10	22264763	intergenic_region	NA	22189526	22204580	evm.model.003017F_PILON.1	XP_021360895.1	myomodulin_neuropeptides_2-like__[Mizuhopecten_yessoensis]	sp|Q2VF17|MYOM2_APLCA	Myomodulin_neuropeptides_2_OS=Aplysia_californica_OX=6500_GN=MMG2_PE=1_SV=1	NA	NA	NO
HiC_scaffold_10	22283412	intron_variant	NA	22276528	22312821	evm.model.000014F_PILON.136	OWF46761.1	hypothetical_protein_KP79_PYT18873__[Mizuhopecten_yessoensis]	NA	NA	NA	NA	YES
HiC_scaffold_10	22286586	synonymous_variant	LOW	22276528	22312821	evm.model.000014F_PILON.136	OWF46761.1	hypothetical_protein_KP79_PYT18873__[Mizuhopecten_yessoensis]	NA	NA	NA	NA	YES
HiC_scaffold_10	22286565	synonymous_variant	LOW	22276528	22312821	evm.model.000014F_PILON.136	OWF46761.1	hypothetical_protein_KP79_PYT18873__[Mizuhopecten_yessoensis]	NA	NA	NA	NA	YES
HiC_scaffold_10	22307233	intron_variant	NA	22276528	22312821	evm.model.000014F_PILON.136	OWF46761.1	hypothetical_protein_KP79_PYT18873__[Mizuhopecten_yessoensis]	NA	NA	NA	NA	YES
HiC_scaffold_10	22307247	intron_variant	NA	22276528	22312821	evm.model.000014F_PILON.136	OWF46761.1	hypothetical_protein_KP79_PYT18873__[Mizuhopecten_yessoensis]	NA	NA	NA	NA	YES
HiC_scaffold_10	22307257	intron_variant	NA	22276528	22312821	evm.model.000014F_PILON.136	OWF46761.1	hypothetical_protein_KP79_PYT18873__[Mizuhopecten_yessoensis]	NA	NA	NA	NA	YES
HiC_scaffold_10	22307258	intron_variant	NA	22276528	22312821	evm.model.000014F_PILON.136	OWF46761.1	hypothetical_protein_KP79_PYT18873__[Mizuhopecten_yessoensis]	NA	NA	NA	NA	YES
HiC_scaffold_10	22315800	downstream_gene_variant	NA	22276528	22312821	evm.model.000014F_PILON.136	OWF46761.1	hypothetical_protein_KP79_PYT18873__[Mizuhopecten_yessoensis]	NA	NA	NA	NA	NO
HiC_scaffold_10	22315782	downstream_gene_variant	NA	22276528	22312821	evm.model.000014F_PILON.136	OWF46761.1	hypothetical_protein_KP79_PYT18873__[Mizuhopecten_yessoensis]	NA	NA	NA	NA	NO
HiC_scaffold_10	22315775	downstream_gene_variant	NA	22276528	22312821	evm.model.000014F_PILON.136	OWF46761.1	hypothetical_protein_KP79_PYT18873__[Mizuhopecten_yessoensis]	NA	NA	NA	NA	NO
HiC_scaffold_10	22355226	upstream_gene_variant	NA	22347354	22352321	evm.model.000014F_PILON.134	OWF41859.1	Acyl-coenzyme_A_amino_acid_N-acyltransferase_1__[Mizuhopecten_yessoensis]	sp|A2AKK5|ACNT1_MOUSE	Acyl-coenzyme_A_amino_acid_N-acyltransferase_1_OS=Mus_musculus_OX=10090_GN=Acnat1_PE=1_SV=1	myi:110461867	K01068_acyl-coenzyme_A_thioesterase_1/2/4_[EC:3.1.2.2]_|_(RefSeq)_acyl-coenzyme_A_amino_acid_N-acyltransferase_1-like_(A)	NO
HiC_scaffold_10	22729032	intergenic_region	NA	22717937	22721981	evm.model.000014F_PILON.119	XP_021353929.1	uncharacterized_protein_LOC110450633__[Mizuhopecten_yessoensis]	NA	NA	NA	NA	NO
HiC_scaffold_10	22746307	intergenic_region	NA	22717937	22721981	evm.model.000014F_PILON.119	XP_021353929.1	uncharacterized_protein_LOC110450633__[Mizuhopecten_yessoensis]	NA	NA	NA	NA	NO
HiC_scaffold_10	22746289	intergenic_region	NA	22717937	22721981	evm.model.000014F_PILON.119	XP_021353929.1	uncharacterized_protein_LOC110450633__[Mizuhopecten_yessoensis]	NA	NA	NA	NA	NO
HiC_scaffold_10	22754716	intergenic_region	NA	22717937	22721981	evm.model.000014F_PILON.119	XP_021353929.1	uncharacterized_protein_LOC110450633__[Mizuhopecten_yessoensis]	NA	NA	NA	NA	NO
HiC_scaffold_10	22754699	intergenic_region	NA	22717937	22721981	evm.model.000014F_PILON.119	XP_021353929.1	uncharacterized_protein_LOC110450633__[Mizuhopecten_yessoensis]	NA	NA	NA	NA	NO
HiC_scaffold_10	22754677	intergenic_region	NA	22717937	22721981	evm.model.000014F_PILON.119	XP_021353929.1	uncharacterized_protein_LOC110450633__[Mizuhopecten_yessoensis]	NA	NA	NA	NA	NO
HiC_scaffold_10	22911621	synonymous_variant	LOW	22902623	22913123	evm.model.000014F_PILON.110	XP_004993095.1	hypothetical_protein_PTSG_06207__[Salpingoeca_rosetta]	sp|Q9W332|CUBN_DROME	Cubilin_homolog_OS=Drosophila_melanogaster_OX=7227_GN=Cubn_PE=2_SV=3	dgr:Dgri_GH12407	K14616_cubilin_|_(RefSeq)_GH12407_gene_product_from_transcript_GH12407-RA_(A)	YES
HiC_scaffold_10	22911606	missense_variant	MODERATE	22902623	22913123	evm.model.000014F_PILON.110	XP_004993095.1	hypothetical_protein_PTSG_06207__[Salpingoeca_rosetta]	sp|Q9W332|CUBN_DROME	Cubilin_homolog_OS=Drosophila_melanogaster_OX=7227_GN=Cubn_PE=2_SV=3	dgr:Dgri_GH12407	K14616_cubilin_|_(RefSeq)_GH12407_gene_product_from_transcript_GH12407-RA_(A)	YES
HiC_scaffold_10	22958111	missense_variant	MODERATE	22954003	22960288	evm.model.000014F_PILON.108	XP_021345821.1	uncharacterized_protein_LOC110445487__[Mizuhopecten_yessoensis]	sp|Q6NZG4|DDIAS_MOUSE	DNA_damage-induced_apoptosis_suppressor_protein_OS=Mus_musculus_OX=10090_GN=Ddias_PE=2_SV=1	NA	NA	YES
HiC_scaffold_10	22979475	intron_variant	NA	22959990	23005157	evm.model.000014F_PILON.107	XP_021345824.1	ABC_transporter_G_family_member_21-like__[Mizuhopecten_yessoensis]	sp|Q93YS4|AB22G_ARATH	ABC_transporter_G_family_member_22_OS=Arabidopsis_thaliana_OX=3702_GN=ABCG22_PE=1_SV=1	sre:PTSG_10425	K05681_ATP-binding_cassette,_subfamily_G_(WHITE),_member_2_|_(RefSeq)_ABC_transporter_(A)	YES
HiC_scaffold_10	22979438	intron_variant	NA	22959990	23005157	evm.model.000014F_PILON.107	XP_021345824.1	ABC_transporter_G_family_member_21-like__[Mizuhopecten_yessoensis]	sp|Q93YS4|AB22G_ARATH	ABC_transporter_G_family_member_22_OS=Arabidopsis_thaliana_OX=3702_GN=ABCG22_PE=1_SV=1	sre:PTSG_10425	K05681_ATP-binding_cassette,_subfamily_G_(WHITE),_member_2_|_(RefSeq)_ABC_transporter_(A)	YES
HiC_scaffold_10	22979418	intron_variant	NA	22959990	23005157	evm.model.000014F_PILON.107	XP_021345824.1	ABC_transporter_G_family_member_21-like__[Mizuhopecten_yessoensis]	sp|Q93YS4|AB22G_ARATH	ABC_transporter_G_family_member_22_OS=Arabidopsis_thaliana_OX=3702_GN=ABCG22_PE=1_SV=1	sre:PTSG_10425	K05681_ATP-binding_cassette,_subfamily_G_(WHITE),_member_2_|_(RefSeq)_ABC_transporter_(A)	YES
HiC_scaffold_10	24703048	intergenic_region	NA	24686357	24687317	evm.model.000014F_PILON.28	ROI27647.1	Acyl-coenzyme_A_thioesterase_3__[Anabarilius_grahami]	NA	NA	tdi:AUW17_09040	K13730_internalin_A_|_(GenBank)_hypothetical_protein_(A)	NO
HiC_scaffold_10	24703002	intergenic_region	NA	24686357	24687317	evm.model.000014F_PILON.28	ROI27647.1	Acyl-coenzyme_A_thioesterase_3__[Anabarilius_grahami]	NA	NA	tdi:AUW17_09040	K13730_internalin_A_|_(GenBank)_hypothetical_protein_(A)	NO
HiC_scaffold_10	24702993	intergenic_region	NA	24686357	24687317	evm.model.000014F_PILON.28	ROI27647.1	Acyl-coenzyme_A_thioesterase_3__[Anabarilius_grahami]	NA	NA	tdi:AUW17_09040	K13730_internalin_A_|_(GenBank)_hypothetical_protein_(A)	NO
HiC_scaffold_10	24735113	intron_variant	NA	24720402	24784666	evm.model.000014F_PILON.25	OWF53013.1	Rhombotin-1__[Mizuhopecten_yessoensis]	sp|Q0P5B3|RBTN1_BOVIN	Rhombotin-1_OS=Bos_taurus_OX=9913_GN=LMO1_PE=2_SV=1	pki:111859419	K15612_rhombotin-2_|_(RefSeq)_lmo2;_rhombotin-2_(A)	YES
HiC_scaffold_10	24735136	intron_variant	NA	24720402	24784666	evm.model.000014F_PILON.25	OWF53013.1	Rhombotin-1__[Mizuhopecten_yessoensis]	sp|Q0P5B3|RBTN1_BOVIN	Rhombotin-1_OS=Bos_taurus_OX=9913_GN=LMO1_PE=2_SV=1	pki:111859419	K15612_rhombotin-2_|_(RefSeq)_lmo2;_rhombotin-2_(A)	YES
HiC_scaffold_10	24735145	intron_variant	NA	24720402	24784666	evm.model.000014F_PILON.25	OWF53013.1	Rhombotin-1__[Mizuhopecten_yessoensis]	sp|Q0P5B3|RBTN1_BOVIN	Rhombotin-1_OS=Bos_taurus_OX=9913_GN=LMO1_PE=2_SV=1	pki:111859419	K15612_rhombotin-2_|_(RefSeq)_lmo2;_rhombotin-2_(A)	YES
HiC_scaffold_10	24747924	intron_variant	NA	24720402	24784666	evm.model.000014F_PILON.25	OWF53013.1	Rhombotin-1__[Mizuhopecten_yessoensis]	sp|Q0P5B3|RBTN1_BOVIN	Rhombotin-1_OS=Bos_taurus_OX=9913_GN=LMO1_PE=2_SV=1	pki:111859419	K15612_rhombotin-2_|_(RefSeq)_lmo2;_rhombotin-2_(A)	YES
HiC_scaffold_10	24747866	intron_variant	NA	24720402	24784666	evm.model.000014F_PILON.25	OWF53013.1	Rhombotin-1__[Mizuhopecten_yessoensis]	sp|Q0P5B3|RBTN1_BOVIN	Rhombotin-1_OS=Bos_taurus_OX=9913_GN=LMO1_PE=2_SV=1	pki:111859419	K15612_rhombotin-2_|_(RefSeq)_lmo2;_rhombotin-2_(A)	YES
HiC_scaffold_10	25002439	intergenic_region	NA	24984415	24986649	evm.model.000014F_PILON.9	KDR13487.1	hypothetical_protein_L798_12254,_partial__[Zootermopsis_nevadensis]	sp|P23253|TCNA_TRYCR	Sialidase_OS=Trypanosoma_cruzi_OX=5693_GN=TCNA_PE=2_SV=1	dpo:Dpse_GA31980	K10955_mucin-2_|_(RefSeq)_uncharacterized_protein_(A)	NO
HiC_scaffold_10	25002459	intergenic_region	NA	24984415	24986649	evm.model.000014F_PILON.9	KDR13487.1	hypothetical_protein_L798_12254,_partial__[Zootermopsis_nevadensis]	sp|P23253|TCNA_TRYCR	Sialidase_OS=Trypanosoma_cruzi_OX=5693_GN=TCNA_PE=2_SV=1	dpo:Dpse_GA31980	K10955_mucin-2_|_(RefSeq)_uncharacterized_protein_(A)	NO
HiC_scaffold_10	25002466	intergenic_region	NA	24984415	24986649	evm.model.000014F_PILON.9	KDR13487.1	hypothetical_protein_L798_12254,_partial__[Zootermopsis_nevadensis]	sp|P23253|TCNA_TRYCR	Sialidase_OS=Trypanosoma_cruzi_OX=5693_GN=TCNA_PE=2_SV=1	dpo:Dpse_GA31980	K10955_mucin-2_|_(RefSeq)_uncharacterized_protein_(A)	NO
HiC_scaffold_10	25071141	downstream_gene_variant	NA	25050481	25070993	evm.model.000014F_PILON.4	XP_021356937.1	uncharacterized_protein_LOC110452627,_partial__[Mizuhopecten_yessoensis]	NA	NA	NA	NA	NO
HiC_scaffold_10	25080013	intergenic_region	NA	25050481	25070993	evm.model.000014F_PILON.4	XP_021356937.1	uncharacterized_protein_LOC110452627,_partial__[Mizuhopecten_yessoensis]	NA	NA	NA	NA	NO
HiC_scaffold_10	26431791	intron_variant	NA	26367468	26449818	evm.model.000008F_PILON.65	XP_021345795.1	uncharacterized_protein_LOC110445468__[Mizuhopecten_yessoensis]	sp|Q9GLP1|FA5_PIG	Coagulation_factor_V_OS=Sus_scrofa_OX=9823_GN=F5_PE=2_SV=1	cfa:100685858	K03902_coagulation_factor_V_(labile_factor)_|_(RefSeq)_F5;_coagulation_factor_V_(A)	YES
HiC_scaffold_10	26431779	intron_variant	NA	26367468	26449818	evm.model.000008F_PILON.65	XP_021345795.1	uncharacterized_protein_LOC110445468__[Mizuhopecten_yessoensis]	sp|Q9GLP1|FA5_PIG	Coagulation_factor_V_OS=Sus_scrofa_OX=9823_GN=F5_PE=2_SV=1	cfa:100685858	K03902_coagulation_factor_V_(labile_factor)_|_(RefSeq)_F5;_coagulation_factor_V_(A)	YES
HiC_scaffold_10	26459272	intergenic_region	NA	26367468	26449818	evm.model.000008F_PILON.65	XP_021345795.1	uncharacterized_protein_LOC110445468__[Mizuhopecten_yessoensis]	sp|Q9GLP1|FA5_PIG	Coagulation_factor_V_OS=Sus_scrofa_OX=9823_GN=F5_PE=2_SV=1	cfa:100685858	K03902_coagulation_factor_V_(labile_factor)_|_(RefSeq)_F5;_coagulation_factor_V_(A)	NO
HiC_scaffold_10	26459259	intergenic_region	NA	26367468	26449818	evm.model.000008F_PILON.65	XP_021345795.1	uncharacterized_protein_LOC110445468__[Mizuhopecten_yessoensis]	sp|Q9GLP1|FA5_PIG	Coagulation_factor_V_OS=Sus_scrofa_OX=9823_GN=F5_PE=2_SV=1	cfa:100685858	K03902_coagulation_factor_V_(labile_factor)_|_(RefSeq)_F5;_coagulation_factor_V_(A)	NO
HiC_scaffold_10	26461265	intergenic_region	NA	26367468	26449818	evm.model.000008F_PILON.65	XP_021345795.1	uncharacterized_protein_LOC110445468__[Mizuhopecten_yessoensis]	sp|Q9GLP1|FA5_PIG	Coagulation_factor_V_OS=Sus_scrofa_OX=9823_GN=F5_PE=2_SV=1	cfa:100685858	K03902_coagulation_factor_V_(labile_factor)_|_(RefSeq)_F5;_coagulation_factor_V_(A)	NO
HiC_scaffold_10	26465726	intergenic_region	NA	26367468	26449818	evm.model.000008F_PILON.65	XP_021345795.1	uncharacterized_protein_LOC110445468__[Mizuhopecten_yessoensis]	sp|Q9GLP1|FA5_PIG	Coagulation_factor_V_OS=Sus_scrofa_OX=9823_GN=F5_PE=2_SV=1	cfa:100685858	K03902_coagulation_factor_V_(labile_factor)_|_(RefSeq)_F5;_coagulation_factor_V_(A)	NO
HiC_scaffold_10	26465701	intergenic_region	NA	26367468	26449818	evm.model.000008F_PILON.65	XP_021345795.1	uncharacterized_protein_LOC110445468__[Mizuhopecten_yessoensis]	sp|Q9GLP1|FA5_PIG	Coagulation_factor_V_OS=Sus_scrofa_OX=9823_GN=F5_PE=2_SV=1	cfa:100685858	K03902_coagulation_factor_V_(labile_factor)_|_(RefSeq)_F5;_coagulation_factor_V_(A)	NO
HiC_scaffold_10	26482156	intergenic_region	NA	26367468	26449818	evm.model.000008F_PILON.65	XP_021345795.1	uncharacterized_protein_LOC110445468__[Mizuhopecten_yessoensis]	sp|Q9GLP1|FA5_PIG	Coagulation_factor_V_OS=Sus_scrofa_OX=9823_GN=F5_PE=2_SV=1	cfa:100685858	K03902_coagulation_factor_V_(labile_factor)_|_(RefSeq)_F5;_coagulation_factor_V_(A)	NO
HiC_scaffold_10	26487149	intergenic_region	NA	26367468	26449818	evm.model.000008F_PILON.65	XP_021345795.1	uncharacterized_protein_LOC110445468__[Mizuhopecten_yessoensis]	sp|Q9GLP1|FA5_PIG	Coagulation_factor_V_OS=Sus_scrofa_OX=9823_GN=F5_PE=2_SV=1	cfa:100685858	K03902_coagulation_factor_V_(labile_factor)_|_(RefSeq)_F5;_coagulation_factor_V_(A)	NO
HiC_scaffold_10	26497304	intergenic_region	NA	26367468	26449818	evm.model.000008F_PILON.65	XP_021345795.1	uncharacterized_protein_LOC110445468__[Mizuhopecten_yessoensis]	sp|Q9GLP1|FA5_PIG	Coagulation_factor_V_OS=Sus_scrofa_OX=9823_GN=F5_PE=2_SV=1	cfa:100685858	K03902_coagulation_factor_V_(labile_factor)_|_(RefSeq)_F5;_coagulation_factor_V_(A)	NO
HiC_scaffold_10	26497329	intergenic_region	NA	26367468	26449818	evm.model.000008F_PILON.65	XP_021345795.1	uncharacterized_protein_LOC110445468__[Mizuhopecten_yessoensis]	sp|Q9GLP1|FA5_PIG	Coagulation_factor_V_OS=Sus_scrofa_OX=9823_GN=F5_PE=2_SV=1	cfa:100685858	K03902_coagulation_factor_V_(labile_factor)_|_(RefSeq)_F5;_coagulation_factor_V_(A)	NO
HiC_scaffold_10	26802728	synonymous_variant	LOW	26801674	26803631	evm.model.000008F_PILON.95	XP_021345745.1	growth_hormone_secretagogue_receptor_type_1-like__[Mizuhopecten_yessoensis]	sp|Q0GBZ5|OX1R_BOVIN	Orexin_receptor_type_1_OS=Bos_taurus_OX=9913_GN=HCRTR1_PE=2_SV=1	obi:106882543	K04194_cholecystokinin_A_receptor_|_(RefSeq)_isotocin_receptor-like_(A)	YES
HiC_scaffold_10	26812538	intergenic_region	NA	26801674	26803631	evm.model.000008F_PILON.95	XP_021345745.1	growth_hormone_secretagogue_receptor_type_1-like__[Mizuhopecten_yessoensis]	sp|Q0GBZ5|OX1R_BOVIN	Orexin_receptor_type_1_OS=Bos_taurus_OX=9913_GN=HCRTR1_PE=2_SV=1	obi:106882543	K04194_cholecystokinin_A_receptor_|_(RefSeq)_isotocin_receptor-like_(A)	NO
HiC_scaffold_10	26812504	intergenic_region	NA	26801674	26803631	evm.model.000008F_PILON.95	XP_021345745.1	growth_hormone_secretagogue_receptor_type_1-like__[Mizuhopecten_yessoensis]	sp|Q0GBZ5|OX1R_BOVIN	Orexin_receptor_type_1_OS=Bos_taurus_OX=9913_GN=HCRTR1_PE=2_SV=1	obi:106882543	K04194_cholecystokinin_A_receptor_|_(RefSeq)_isotocin_receptor-like_(A)	NO
HiC_scaffold_10	26820384	intergenic_region	NA	26801674	26803631	evm.model.000008F_PILON.95	XP_021345745.1	growth_hormone_secretagogue_receptor_type_1-like__[Mizuhopecten_yessoensis]	sp|Q0GBZ5|OX1R_BOVIN	Orexin_receptor_type_1_OS=Bos_taurus_OX=9913_GN=HCRTR1_PE=2_SV=1	obi:106882543	K04194_cholecystokinin_A_receptor_|_(RefSeq)_isotocin_receptor-like_(A)	NO
HiC_scaffold_10	26820411	intergenic_region	NA	26801674	26803631	evm.model.000008F_PILON.95	XP_021345745.1	growth_hormone_secretagogue_receptor_type_1-like__[Mizuhopecten_yessoensis]	sp|Q0GBZ5|OX1R_BOVIN	Orexin_receptor_type_1_OS=Bos_taurus_OX=9913_GN=HCRTR1_PE=2_SV=1	obi:106882543	K04194_cholecystokinin_A_receptor_|_(RefSeq)_isotocin_receptor-like_(A)	NO
HiC_scaffold_10	26820346	intergenic_region	NA	26801674	26803631	evm.model.000008F_PILON.95	XP_021345745.1	growth_hormone_secretagogue_receptor_type_1-like__[Mizuhopecten_yessoensis]	sp|Q0GBZ5|OX1R_BOVIN	Orexin_receptor_type_1_OS=Bos_taurus_OX=9913_GN=HCRTR1_PE=2_SV=1	obi:106882543	K04194_cholecystokinin_A_receptor_|_(RefSeq)_isotocin_receptor-like_(A)	NO
HiC_scaffold_10	26846163	intergenic_region	NA	26801674	26803631	evm.model.000008F_PILON.95	XP_021345745.1	growth_hormone_secretagogue_receptor_type_1-like__[Mizuhopecten_yessoensis]	sp|Q0GBZ5|OX1R_BOVIN	Orexin_receptor_type_1_OS=Bos_taurus_OX=9913_GN=HCRTR1_PE=2_SV=1	obi:106882543	K04194_cholecystokinin_A_receptor_|_(RefSeq)_isotocin_receptor-like_(A)	NO
HiC_scaffold_10	26846164	intergenic_region	NA	26801674	26803631	evm.model.000008F_PILON.95	XP_021345745.1	growth_hormone_secretagogue_receptor_type_1-like__[Mizuhopecten_yessoensis]	sp|Q0GBZ5|OX1R_BOVIN	Orexin_receptor_type_1_OS=Bos_taurus_OX=9913_GN=HCRTR1_PE=2_SV=1	obi:106882543	K04194_cholecystokinin_A_receptor_|_(RefSeq)_isotocin_receptor-like_(A)	NO
HiC_scaffold_10	26846175	intergenic_region	NA	26801674	26803631	evm.model.000008F_PILON.95	XP_021345745.1	growth_hormone_secretagogue_receptor_type_1-like__[Mizuhopecten_yessoensis]	sp|Q0GBZ5|OX1R_BOVIN	Orexin_receptor_type_1_OS=Bos_taurus_OX=9913_GN=HCRTR1_PE=2_SV=1	obi:106882543	K04194_cholecystokinin_A_receptor_|_(RefSeq)_isotocin_receptor-like_(A)	NO
HiC_scaffold_10	26846121	intergenic_region	NA	26801674	26803631	evm.model.000008F_PILON.95	XP_021345745.1	growth_hormone_secretagogue_receptor_type_1-like__[Mizuhopecten_yessoensis]	sp|Q0GBZ5|OX1R_BOVIN	Orexin_receptor_type_1_OS=Bos_taurus_OX=9913_GN=HCRTR1_PE=2_SV=1	obi:106882543	K04194_cholecystokinin_A_receptor_|_(RefSeq)_isotocin_receptor-like_(A)	NO
HiC_scaffold_10	26945825	intron_variant	NA	26930742	26952394	evm.model.000008F_PILON.98	XP_021345748.1	CD151_antigen-like__[Mizuhopecten_yessoensis]	sp|Q568Y5|TSN11_RAT	Tetraspanin-11_OS=Rattus_norvegicus_OX=10116_GN=Tspan11_PE=2_SV=1	crg:105345760	K06537_CD151_antigen_|_(RefSeq)_CD151_antigen-like_(A)	YES
HiC_scaffold_10	26945834	intron_variant	NA	26930742	26952394	evm.model.000008F_PILON.98	XP_021345748.1	CD151_antigen-like__[Mizuhopecten_yessoensis]	sp|Q568Y5|TSN11_RAT	Tetraspanin-11_OS=Rattus_norvegicus_OX=10116_GN=Tspan11_PE=2_SV=1	crg:105345760	K06537_CD151_antigen_|_(RefSeq)_CD151_antigen-like_(A)	YES
HiC_scaffold_10	26953437	synonymous_variant	LOW	26952936	26983425	evm.model.000008F_PILON.99	XP_021345797.1	deubiquitinating_protein_VCIP135-like__[Mizuhopecten_yessoensis]	sp|Q8CF97|VCIP1_RAT	Deubiquitinating_protein_VCIP135_OS=Rattus_norvegicus_OX=10116_GN=Vcpip1_PE=1_SV=2	myi:110445472	K11861_deubiquitinating_protein_VCIP135_[EC:3.4.19.12]_|_(RefSeq)_deubiquitinating_protein_VCIP135-like_(A)	YES
HiC_scaffold_10	26953433	missense_variant	MODERATE	26952936	26983425	evm.model.000008F_PILON.99	XP_021345797.1	deubiquitinating_protein_VCIP135-like__[Mizuhopecten_yessoensis]	sp|Q8CF97|VCIP1_RAT	Deubiquitinating_protein_VCIP135_OS=Rattus_norvegicus_OX=10116_GN=Vcpip1_PE=1_SV=2	myi:110445472	K11861_deubiquitinating_protein_VCIP135_[EC:3.4.19.12]_|_(RefSeq)_deubiquitinating_protein_VCIP135-like_(A)	YES
HiC_scaffold_10	26988148	upstream_gene_variant	NA	26985849	26995986	evm.model.000008F_PILON.100	XP_021345799.1	protein_phosphatase_inhibitor_2-like__[Mizuhopecten_yessoensis]	sp|P41236|IPP2_HUMAN	Protein_phosphatase_inhibitor_2_OS=Homo_sapiens_OX=9606_GN=PPP1R2_PE=1_SV=2	myi:110445473	K16833_protein_phosphatase_inhibitor_2_|_(RefSeq)_protein_phosphatase_inhibitor_2-like_(A)	YES
HiC_scaffold_10	26988133	upstream_gene_variant	NA	26985849	26995986	evm.model.000008F_PILON.100	XP_021345799.1	protein_phosphatase_inhibitor_2-like__[Mizuhopecten_yessoensis]	sp|P41236|IPP2_HUMAN	Protein_phosphatase_inhibitor_2_OS=Homo_sapiens_OX=9606_GN=PPP1R2_PE=1_SV=2	myi:110445473	K16833_protein_phosphatase_inhibitor_2_|_(RefSeq)_protein_phosphatase_inhibitor_2-like_(A)	YES
HiC_scaffold_10	27022396	intron_variant	NA	27013726	27027635	evm.model.000008F_PILON.102	XP_021345801.1	26S_proteasome_non-ATPase_regulatory_subunit_2-like__[Mizuhopecten_yessoensis]	sp|Q4FZT9|PSMD2_RAT	26S_proteasome_non-ATPase_regulatory_subunit_2_OS=Rattus_norvegicus_OX=10116_GN=Psmd2_PE=1_SV=1	myi:110445475	K03028_26S_proteasome_regulatory_subunit_N1_|_(RefSeq)_26S_proteasome_non-ATPase_regulatory_subunit_2-like_(A)	YES
HiC_scaffold_10	27022393	intron_variant	NA	27013726	27027635	evm.model.000008F_PILON.102	XP_021345801.1	26S_proteasome_non-ATPase_regulatory_subunit_2-like__[Mizuhopecten_yessoensis]	sp|Q4FZT9|PSMD2_RAT	26S_proteasome_non-ATPase_regulatory_subunit_2_OS=Rattus_norvegicus_OX=10116_GN=Psmd2_PE=1_SV=1	myi:110445475	K03028_26S_proteasome_regulatory_subunit_N1_|_(RefSeq)_26S_proteasome_non-ATPase_regulatory_subunit_2-like_(A)	YES
HiC_scaffold_10	27029410	upstream_gene_variant	NA	27028489	27067513	evm.model.000008F_PILON.103	XP_021345803.1	kinesin-like_protein_KIF17_isoform_X2__[Mizuhopecten_yessoensis]	sp|Q99PW8|KIF17_MOUSE	Kinesin-like_protein_KIF17_OS=Mus_musculus_OX=10090_GN=Kif17_PE=1_SV=1	myi:110445476	K20198_kinesin_family_member_17_|_(RefSeq)_kinesin-like_protein_KIF17_isoform_X1_(A)	YES
HiC_scaffold_10	27061040	intron_variant	NA	27028489	27067513	evm.model.000008F_PILON.103	XP_021345803.1	kinesin-like_protein_KIF17_isoform_X2__[Mizuhopecten_yessoensis]	sp|Q99PW8|KIF17_MOUSE	Kinesin-like_protein_KIF17_OS=Mus_musculus_OX=10090_GN=Kif17_PE=1_SV=1	myi:110445476	K20198_kinesin_family_member_17_|_(RefSeq)_kinesin-like_protein_KIF17_isoform_X1_(A)	YES
HiC_scaffold_10	27078338	synonymous_variant	LOW	27075168	27078372	evm.model.000008F_PILON.105	OWF54172.1	hypothetical_protein_KP79_PYT18918__[Mizuhopecten_yessoensis]	NA	NA	NA	NA	YES
HiC_scaffold_10	27201102	intron_variant	NA	27191624	27204888	evm.model.000008F_PILON.111	XP_021348009.1	probable_tubulin_polyglutamylase_TTLL1__[Mizuhopecten_yessoensis]	sp|Q0VC71|TTLL1_BOVIN	Probable_tubulin_polyglutamylase_TTLL1_OS=Bos_taurus_OX=9913_GN=TTLL1_PE=2_SV=1	myi:110446976	K16599_tubulin_polyglutamylase_TTLL1_[EC:6.-.-.-]_|_(RefSeq)_probable_tubulin_polyglutamylase_TTLL1_(A)	YES
HiC_scaffold_10	27201100	intron_variant	NA	27191624	27204888	evm.model.000008F_PILON.111	XP_021348009.1	probable_tubulin_polyglutamylase_TTLL1__[Mizuhopecten_yessoensis]	sp|Q0VC71|TTLL1_BOVIN	Probable_tubulin_polyglutamylase_TTLL1_OS=Bos_taurus_OX=9913_GN=TTLL1_PE=2_SV=1	myi:110446976	K16599_tubulin_polyglutamylase_TTLL1_[EC:6.-.-.-]_|_(RefSeq)_probable_tubulin_polyglutamylase_TTLL1_(A)	YES
HiC_scaffold_10	27201094	intron_variant	NA	27191624	27204888	evm.model.000008F_PILON.111	XP_021348009.1	probable_tubulin_polyglutamylase_TTLL1__[Mizuhopecten_yessoensis]	sp|Q0VC71|TTLL1_BOVIN	Probable_tubulin_polyglutamylase_TTLL1_OS=Bos_taurus_OX=9913_GN=TTLL1_PE=2_SV=1	myi:110446976	K16599_tubulin_polyglutamylase_TTLL1_[EC:6.-.-.-]_|_(RefSeq)_probable_tubulin_polyglutamylase_TTLL1_(A)	YES
HiC_scaffold_10	27201093	intron_variant	NA	27191624	27204888	evm.model.000008F_PILON.111	XP_021348009.1	probable_tubulin_polyglutamylase_TTLL1__[Mizuhopecten_yessoensis]	sp|Q0VC71|TTLL1_BOVIN	Probable_tubulin_polyglutamylase_TTLL1_OS=Bos_taurus_OX=9913_GN=TTLL1_PE=2_SV=1	myi:110446976	K16599_tubulin_polyglutamylase_TTLL1_[EC:6.-.-.-]_|_(RefSeq)_probable_tubulin_polyglutamylase_TTLL1_(A)	YES
HiC_scaffold_10	27209253	upstream_gene_variant	NA	27206545	27224712	evm.model.000008F_PILON.112	XP_021348010.1	transmembrane_protein_41B-like_isoform_X1__[Mizuhopecten_yessoensis]	sp|Q5ZIL6|TM41B_CHICK	Transmembrane_protein_41B_OS=Gallus_gallus_OX=9031_GN=TMEM41B_PE=2_SV=1	apro:F751_6247	K16302_metal_transporter_CNNM_|_(RefSeq)_Protein_MAM3_(A)	YES
HiC_scaffold_10	27225163	missense_variant	MODERATE	27216453	27226808	evm.model.000008F_PILON.113	XP_021348008.1	uncharacterized_protein_LOC110446975__[Mizuhopecten_yessoensis]	NA	NA	myi:110466486	K12026_tripartite_motif-containing_protein_56_[EC:2.3.2.27]_|_(RefSeq)_probable_E3_ubiquitin-protein_ligase_TRIM8_(A)	YES
HiC_scaffold_10	27262147	intergenic_region	NA	27235206	27242662	evm.model.000008F_PILON.115	AKS83613.1	putative_membrane_protein__[Yersinia_pestis_790]	NA	NA	NA	NA	NO
HiC_scaffold_10	27288682	downstream_gene_variant	NA	27269992	27281985	evm.model.000008F_PILON.116	XP_021348007.1	sodium-_and_chloride-dependent_GABA_transporter_1-like__[Mizuhopecten_yessoensis]	sp|Q9Y345|SC6A5_HUMAN	Sodium-_and_chloride-dependent_glycine_transporter_2_OS=Homo_sapiens_OX=9606_GN=SLC6A5_PE=1_SV=3	myi:110446974	K05038_solute_carrier_family_6_(neurotransmitter_transporter,_glycine)_member_5/9_|_(RefSeq)_sodium-_and_chloride-dependent_GABA_transporter_1-like_(A)	NO
HiC_scaffold_10	27288659	downstream_gene_variant	NA	27269992	27281985	evm.model.000008F_PILON.116	XP_021348007.1	sodium-_and_chloride-dependent_GABA_transporter_1-like__[Mizuhopecten_yessoensis]	sp|Q9Y345|SC6A5_HUMAN	Sodium-_and_chloride-dependent_glycine_transporter_2_OS=Homo_sapiens_OX=9606_GN=SLC6A5_PE=1_SV=3	myi:110446974	K05038_solute_carrier_family_6_(neurotransmitter_transporter,_glycine)_member_5/9_|_(RefSeq)_sodium-_and_chloride-dependent_GABA_transporter_1-like_(A)	NO
HiC_scaffold_10	27290114	3_prime_UTR_variant	NA	27290050	27302804	evm.model.000008F_PILON.117	XP_021348006.1	sodium-_and_chloride-dependent_glycine_transporter_1-like__[Mizuhopecten_yessoensis]	sp|A7Y2W8|SC6A9_XENLA	Sodium-_and_chloride-dependent_glycine_transporter_1_OS=Xenopus_laevis_OX=8355_GN=slc6a9_PE=2_SV=1	myi:110446973	K05038_solute_carrier_family_6_(neurotransmitter_transporter,_glycine)_member_5/9_|_(RefSeq)_sodium-_and_chloride-dependent_glycine_transporter_1-like_(A)	YES
HiC_scaffold_10	27294420	intron_variant	NA	27290050	27302804	evm.model.000008F_PILON.117	XP_021348006.1	sodium-_and_chloride-dependent_glycine_transporter_1-like__[Mizuhopecten_yessoensis]	sp|A7Y2W8|SC6A9_XENLA	Sodium-_and_chloride-dependent_glycine_transporter_1_OS=Xenopus_laevis_OX=8355_GN=slc6a9_PE=2_SV=1	myi:110446973	K05038_solute_carrier_family_6_(neurotransmitter_transporter,_glycine)_member_5/9_|_(RefSeq)_sodium-_and_chloride-dependent_glycine_transporter_1-like_(A)	YES
HiC_scaffold_10	27304055	upstream_gene_variant	NA	27290050	27302804	evm.model.000008F_PILON.117	XP_021348006.1	sodium-_and_chloride-dependent_glycine_transporter_1-like__[Mizuhopecten_yessoensis]	sp|A7Y2W8|SC6A9_XENLA	Sodium-_and_chloride-dependent_glycine_transporter_1_OS=Xenopus_laevis_OX=8355_GN=slc6a9_PE=2_SV=1	myi:110446973	K05038_solute_carrier_family_6_(neurotransmitter_transporter,_glycine)_member_5/9_|_(RefSeq)_sodium-_and_chloride-dependent_glycine_transporter_1-like_(A)	NO
HiC_scaffold_10	27304058	upstream_gene_variant	NA	27290050	27302804	evm.model.000008F_PILON.117	XP_021348006.1	sodium-_and_chloride-dependent_glycine_transporter_1-like__[Mizuhopecten_yessoensis]	sp|A7Y2W8|SC6A9_XENLA	Sodium-_and_chloride-dependent_glycine_transporter_1_OS=Xenopus_laevis_OX=8355_GN=slc6a9_PE=2_SV=1	myi:110446973	K05038_solute_carrier_family_6_(neurotransmitter_transporter,_glycine)_member_5/9_|_(RefSeq)_sodium-_and_chloride-dependent_glycine_transporter_1-like_(A)	NO
HiC_scaffold_10	27320828	intergenic_region	NA	27290050	27302804	evm.model.000008F_PILON.117	XP_021348006.1	sodium-_and_chloride-dependent_glycine_transporter_1-like__[Mizuhopecten_yessoensis]	sp|A7Y2W8|SC6A9_XENLA	Sodium-_and_chloride-dependent_glycine_transporter_1_OS=Xenopus_laevis_OX=8355_GN=slc6a9_PE=2_SV=1	myi:110446973	K05038_solute_carrier_family_6_(neurotransmitter_transporter,_glycine)_member_5/9_|_(RefSeq)_sodium-_and_chloride-dependent_glycine_transporter_1-like_(A)	NO
HiC_scaffold_10	27320779	intergenic_region	NA	27290050	27302804	evm.model.000008F_PILON.117	XP_021348006.1	sodium-_and_chloride-dependent_glycine_transporter_1-like__[Mizuhopecten_yessoensis]	sp|A7Y2W8|SC6A9_XENLA	Sodium-_and_chloride-dependent_glycine_transporter_1_OS=Xenopus_laevis_OX=8355_GN=slc6a9_PE=2_SV=1	myi:110446973	K05038_solute_carrier_family_6_(neurotransmitter_transporter,_glycine)_member_5/9_|_(RefSeq)_sodium-_and_chloride-dependent_glycine_transporter_1-like_(A)	NO
HiC_scaffold_10	27320778	intergenic_region	NA	27290050	27302804	evm.model.000008F_PILON.117	XP_021348006.1	sodium-_and_chloride-dependent_glycine_transporter_1-like__[Mizuhopecten_yessoensis]	sp|A7Y2W8|SC6A9_XENLA	Sodium-_and_chloride-dependent_glycine_transporter_1_OS=Xenopus_laevis_OX=8355_GN=slc6a9_PE=2_SV=1	myi:110446973	K05038_solute_carrier_family_6_(neurotransmitter_transporter,_glycine)_member_5/9_|_(RefSeq)_sodium-_and_chloride-dependent_glycine_transporter_1-like_(A)	NO
HiC_scaffold_10	27337656	downstream_gene_variant	NA	27332146	27333452	evm.model.000008F_PILON.121	NA	NA	NA	NA	NA	NA	NO
HiC_scaffold_10	27342979	intergenic_region	NA	27332146	27333452	evm.model.000008F_PILON.121	NA	NA	NA	NA	NA	NA	NO
HiC_scaffold_10	27342978	intergenic_region	NA	27332146	27333452	evm.model.000008F_PILON.121	NA	NA	NA	NA	NA	NA	NO
HiC_scaffold_10	27342977	intergenic_region	NA	27332146	27333452	evm.model.000008F_PILON.121	NA	NA	NA	NA	NA	NA	NO
HiC_scaffold_10	27350283	intergenic_region	NA	27332146	27333452	evm.model.000008F_PILON.121	NA	NA	NA	NA	NA	NA	NO
HiC_scaffold_10	27402314	synonymous_variant	LOW	27402196	27437018	evm.model.000008F_PILON.127	XP_021368325.1	uncharacterized_protein_LOC110459982__[Mizuhopecten_yessoensis]	NA	NA	otw:112237442	K22937_lysosomal-trafficking_regulator_|_(RefSeq)_LOW_QUALITY_PROTEIN:_lysosomal-trafficking_regulator-like_(A)	YES
HiC_scaffold_10	27414169	intron_variant	NA	27402196	27437018	evm.model.000008F_PILON.127	XP_021368325.1	uncharacterized_protein_LOC110459982__[Mizuhopecten_yessoensis]	NA	NA	otw:112237442	K22937_lysosomal-trafficking_regulator_|_(RefSeq)_LOW_QUALITY_PROTEIN:_lysosomal-trafficking_regulator-like_(A)	YES
HiC_scaffold_10	27414129	intron_variant	NA	27402196	27437018	evm.model.000008F_PILON.127	XP_021368325.1	uncharacterized_protein_LOC110459982__[Mizuhopecten_yessoensis]	NA	NA	otw:112237442	K22937_lysosomal-trafficking_regulator_|_(RefSeq)_LOW_QUALITY_PROTEIN:_lysosomal-trafficking_regulator-like_(A)	YES
HiC_scaffold_10	27414118	intron_variant	NA	27402196	27437018	evm.model.000008F_PILON.127	XP_021368325.1	uncharacterized_protein_LOC110459982__[Mizuhopecten_yessoensis]	NA	NA	otw:112237442	K22937_lysosomal-trafficking_regulator_|_(RefSeq)_LOW_QUALITY_PROTEIN:_lysosomal-trafficking_regulator-like_(A)	YES
HiC_scaffold_10	27414099	intron_variant	NA	27402196	27437018	evm.model.000008F_PILON.127	XP_021368325.1	uncharacterized_protein_LOC110459982__[Mizuhopecten_yessoensis]	NA	NA	otw:112237442	K22937_lysosomal-trafficking_regulator_|_(RefSeq)_LOW_QUALITY_PROTEIN:_lysosomal-trafficking_regulator-like_(A)	YES
HiC_scaffold_10	27463822	intron_variant	NA	27447360	27484379	evm.model.000008F_PILON.128	OWF43223.1	SET_and_MYND_domain-containing_protein_4__[Mizuhopecten_yessoensis]	sp|Q8BTK5|SMYD4_MOUSE	SET_and_MYND_domain-containing_protein_4_OS=Mus_musculus_OX=10090_GN=Smyd4_PE=2_SV=2	isc:IscW_ISCW000409	K11426_SET_and_MYND_domain-containing_protein_|_(RefSeq)_SET_and_MYND_domain-containing_protein_(SMYD),_putative_(A)	YES
HiC_scaffold_10	27463803	intron_variant	NA	27447360	27484379	evm.model.000008F_PILON.128	OWF43223.1	SET_and_MYND_domain-containing_protein_4__[Mizuhopecten_yessoensis]	sp|Q8BTK5|SMYD4_MOUSE	SET_and_MYND_domain-containing_protein_4_OS=Mus_musculus_OX=10090_GN=Smyd4_PE=2_SV=2	isc:IscW_ISCW000409	K11426_SET_and_MYND_domain-containing_protein_|_(RefSeq)_SET_and_MYND_domain-containing_protein_(SMYD),_putative_(A)	YES
HiC_scaffold_10	27481218	intron_variant	NA	27447360	27484379	evm.model.000008F_PILON.128	OWF43223.1	SET_and_MYND_domain-containing_protein_4__[Mizuhopecten_yessoensis]	sp|Q8BTK5|SMYD4_MOUSE	SET_and_MYND_domain-containing_protein_4_OS=Mus_musculus_OX=10090_GN=Smyd4_PE=2_SV=2	isc:IscW_ISCW000409	K11426_SET_and_MYND_domain-containing_protein_|_(RefSeq)_SET_and_MYND_domain-containing_protein_(SMYD),_putative_(A)	YES
HiC_scaffold_10	27481162	intron_variant	NA	27447360	27484379	evm.model.000008F_PILON.128	OWF43223.1	SET_and_MYND_domain-containing_protein_4__[Mizuhopecten_yessoensis]	sp|Q8BTK5|SMYD4_MOUSE	SET_and_MYND_domain-containing_protein_4_OS=Mus_musculus_OX=10090_GN=Smyd4_PE=2_SV=2	isc:IscW_ISCW000409	K11426_SET_and_MYND_domain-containing_protein_|_(RefSeq)_SET_and_MYND_domain-containing_protein_(SMYD),_putative_(A)	YES
HiC_scaffold_10	27503262	intron_variant	NA	27490598	27504741	evm.model.000008F_PILON.129	XP_021368125.1	transcriptional_activator_Myb-like_isoform_X2__[Mizuhopecten_yessoensis]	sp|P10242|MYB_HUMAN	Transcriptional_activator_Myb_OS=Homo_sapiens_OX=9606_GN=MYB_PE=1_SV=2	pcan:112559043	K09420_transcriptional_activator_Myb_|_(RefSeq)_myb-related_protein_A-like_isoform_X1_(A)	YES
HiC_scaffold_10	27503788	splice_region_variant&intron_variant	LOW	27490598	27504741	evm.model.000008F_PILON.129	XP_021368125.1	transcriptional_activator_Myb-like_isoform_X2__[Mizuhopecten_yessoensis]	sp|P10242|MYB_HUMAN	Transcriptional_activator_Myb_OS=Homo_sapiens_OX=9606_GN=MYB_PE=1_SV=2	pcan:112559043	K09420_transcriptional_activator_Myb_|_(RefSeq)_myb-related_protein_A-like_isoform_X1_(A)	YES
HiC_scaffold_10	27503811	intron_variant	NA	27490598	27504741	evm.model.000008F_PILON.129	XP_021368125.1	transcriptional_activator_Myb-like_isoform_X2__[Mizuhopecten_yessoensis]	sp|P10242|MYB_HUMAN	Transcriptional_activator_Myb_OS=Homo_sapiens_OX=9606_GN=MYB_PE=1_SV=2	pcan:112559043	K09420_transcriptional_activator_Myb_|_(RefSeq)_myb-related_protein_A-like_isoform_X1_(A)	YES
HiC_scaffold_10	27524002	upstream_gene_variant	NA	27516373	27519836	evm.model.000008F_PILON.131	XP_021368208.1	uncharacterized_protein_LOC110459960__[Mizuhopecten_yessoensis]	NA	NA	NA	NA	NO
HiC_scaffold_10	27524016	upstream_gene_variant	NA	27516373	27519836	evm.model.000008F_PILON.131	XP_021368208.1	uncharacterized_protein_LOC110459960__[Mizuhopecten_yessoensis]	NA	NA	NA	NA	NO
HiC_scaffold_10	27523981	upstream_gene_variant	NA	27516373	27519836	evm.model.000008F_PILON.131	XP_021368208.1	uncharacterized_protein_LOC110459960__[Mizuhopecten_yessoensis]	NA	NA	NA	NA	NO
HiC_scaffold_10	27523962	upstream_gene_variant	NA	27516373	27519836	evm.model.000008F_PILON.131	XP_021368208.1	uncharacterized_protein_LOC110459960__[Mizuhopecten_yessoensis]	NA	NA	NA	NA	NO
HiC_scaffold_10	27523952	upstream_gene_variant	NA	27516373	27519836	evm.model.000008F_PILON.131	XP_021368208.1	uncharacterized_protein_LOC110459960__[Mizuhopecten_yessoensis]	NA	NA	NA	NA	NO
HiC_scaffold_10	27590050	synonymous_variant	LOW	27552861	27600914	evm.model.000008F_PILON.132	OWF43219.1	Myotubularin-related_protein_13__[Mizuhopecten_yessoensis]	sp|Q6NTN5|MTMRD_XENLA	Myotubularin-related_protein_13_OS=Xenopus_laevis_OX=8355_GN=sbf2_PE=2_SV=1	myi:110459916	K18061_myotubularin-related_protein_5/13_|_(RefSeq)_myotubularin-related_protein_13-like_(A)	YES
HiC_scaffold_10	27611699	upstream_gene_variant	NA	27552861	27600914	evm.model.000008F_PILON.132	OWF43219.1	Myotubularin-related_protein_13__[Mizuhopecten_yessoensis]	sp|Q6NTN5|MTMRD_XENLA	Myotubularin-related_protein_13_OS=Xenopus_laevis_OX=8355_GN=sbf2_PE=2_SV=1	myi:110459916	K18061_myotubularin-related_protein_5/13_|_(RefSeq)_myotubularin-related_protein_13-like_(A)	NO
HiC_scaffold_10	27630259	synonymous_variant	LOW	27614335	27633552	evm.model.000008F_PILON.133	XP_021368192.1	uncharacterized_protein_LOC110459955__[Mizuhopecten_yessoensis]	sp|Q5CZC0|FSIP2_HUMAN	Fibrous_sheath-interacting_protein_2_OS=Homo_sapiens_OX=9606_GN=FSIP2_PE=2_SV=4	NA	NA	YES
HiC_scaffold_10	27636799	downstream_gene_variant	NA	27614335	27633552	evm.model.000008F_PILON.133	XP_021368192.1	uncharacterized_protein_LOC110459955__[Mizuhopecten_yessoensis]	sp|Q5CZC0|FSIP2_HUMAN	Fibrous_sheath-interacting_protein_2_OS=Homo_sapiens_OX=9606_GN=FSIP2_PE=2_SV=4	NA	NA	NO
HiC_scaffold_10	27636794	downstream_gene_variant	NA	27614335	27633552	evm.model.000008F_PILON.133	XP_021368192.1	uncharacterized_protein_LOC110459955__[Mizuhopecten_yessoensis]	sp|Q5CZC0|FSIP2_HUMAN	Fibrous_sheath-interacting_protein_2_OS=Homo_sapiens_OX=9606_GN=FSIP2_PE=2_SV=4	NA	NA	NO
HiC_scaffold_10	27636772	downstream_gene_variant	NA	27614335	27633552	evm.model.000008F_PILON.133	XP_021368192.1	uncharacterized_protein_LOC110459955__[Mizuhopecten_yessoensis]	sp|Q5CZC0|FSIP2_HUMAN	Fibrous_sheath-interacting_protein_2_OS=Homo_sapiens_OX=9606_GN=FSIP2_PE=2_SV=4	NA	NA	NO
HiC_scaffold_10	27696615	intergenic_region	NA	27672614	27681552	evm.model.000008F_PILON.139	XP_021368224.1	UHRF1-binding_protein_1-like_isoform_X2__[Mizuhopecten_yessoensis]	sp|Q6NRZ1|UH1BL_XENLA	UHRF1-binding_protein_1-like_OS=Xenopus_laevis_OX=8355_GN=uhrf1bp1l_PE=2_SV=1	NA	NA	NO
HiC_scaffold_10	27696642	intergenic_region	NA	27672614	27681552	evm.model.000008F_PILON.139	XP_021368224.1	UHRF1-binding_protein_1-like_isoform_X2__[Mizuhopecten_yessoensis]	sp|Q6NRZ1|UH1BL_XENLA	UHRF1-binding_protein_1-like_OS=Xenopus_laevis_OX=8355_GN=uhrf1bp1l_PE=2_SV=1	NA	NA	NO
HiC_scaffold_10	27818023	intron_variant	NA	27797950	27893382	evm.model.000008F_PILON.144	XP_011448284.1	PREDICTED:_ligand_of_Numb_protein_X_2_isoform_X2__[Crassostrea_gigas]	sp|Q8N448|LNX2_HUMAN	Ligand_of_Numb_protein_X_2_OS=Homo_sapiens_OX=9606_GN=LNX2_PE=1_SV=1	crg:105342893	K10692_ligand_of_Numb_protein_X_1/2_[EC:2.3.2.27]_|_(RefSeq)_ligand_of_Numb_protein_X_2_isoform_X1_(A)	YES
HiC_scaffold_10	27818024	intron_variant	NA	27797950	27893382	evm.model.000008F_PILON.144	XP_011448284.1	PREDICTED:_ligand_of_Numb_protein_X_2_isoform_X2__[Crassostrea_gigas]	sp|Q8N448|LNX2_HUMAN	Ligand_of_Numb_protein_X_2_OS=Homo_sapiens_OX=9606_GN=LNX2_PE=1_SV=1	crg:105342893	K10692_ligand_of_Numb_protein_X_1/2_[EC:2.3.2.27]_|_(RefSeq)_ligand_of_Numb_protein_X_2_isoform_X1_(A)	YES
HiC_scaffold_10	27817998	intron_variant	NA	27797950	27893382	evm.model.000008F_PILON.144	XP_011448284.1	PREDICTED:_ligand_of_Numb_protein_X_2_isoform_X2__[Crassostrea_gigas]	sp|Q8N448|LNX2_HUMAN	Ligand_of_Numb_protein_X_2_OS=Homo_sapiens_OX=9606_GN=LNX2_PE=1_SV=1	crg:105342893	K10692_ligand_of_Numb_protein_X_1/2_[EC:2.3.2.27]_|_(RefSeq)_ligand_of_Numb_protein_X_2_isoform_X1_(A)	YES
HiC_scaffold_10	27817976	intron_variant	NA	27797950	27893382	evm.model.000008F_PILON.144	XP_011448284.1	PREDICTED:_ligand_of_Numb_protein_X_2_isoform_X2__[Crassostrea_gigas]	sp|Q8N448|LNX2_HUMAN	Ligand_of_Numb_protein_X_2_OS=Homo_sapiens_OX=9606_GN=LNX2_PE=1_SV=1	crg:105342893	K10692_ligand_of_Numb_protein_X_1/2_[EC:2.3.2.27]_|_(RefSeq)_ligand_of_Numb_protein_X_2_isoform_X1_(A)	YES
HiC_scaffold_10	27828469	intron_variant	NA	27797950	27893382	evm.model.000008F_PILON.144	XP_011448284.1	PREDICTED:_ligand_of_Numb_protein_X_2_isoform_X2__[Crassostrea_gigas]	sp|Q8N448|LNX2_HUMAN	Ligand_of_Numb_protein_X_2_OS=Homo_sapiens_OX=9606_GN=LNX2_PE=1_SV=1	crg:105342893	K10692_ligand_of_Numb_protein_X_1/2_[EC:2.3.2.27]_|_(RefSeq)_ligand_of_Numb_protein_X_2_isoform_X1_(A)	YES
HiC_scaffold_10	27828488	intron_variant	NA	27797950	27893382	evm.model.000008F_PILON.144	XP_011448284.1	PREDICTED:_ligand_of_Numb_protein_X_2_isoform_X2__[Crassostrea_gigas]	sp|Q8N448|LNX2_HUMAN	Ligand_of_Numb_protein_X_2_OS=Homo_sapiens_OX=9606_GN=LNX2_PE=1_SV=1	crg:105342893	K10692_ligand_of_Numb_protein_X_1/2_[EC:2.3.2.27]_|_(RefSeq)_ligand_of_Numb_protein_X_2_isoform_X1_(A)	YES
HiC_scaffold_10	27843628	intron_variant	NA	27797950	27893382	evm.model.000008F_PILON.144	XP_011448284.1	PREDICTED:_ligand_of_Numb_protein_X_2_isoform_X2__[Crassostrea_gigas]	sp|Q8N448|LNX2_HUMAN	Ligand_of_Numb_protein_X_2_OS=Homo_sapiens_OX=9606_GN=LNX2_PE=1_SV=1	crg:105342893	K10692_ligand_of_Numb_protein_X_1/2_[EC:2.3.2.27]_|_(RefSeq)_ligand_of_Numb_protein_X_2_isoform_X1_(A)	YES
HiC_scaffold_10	27863025	intron_variant	NA	27797950	27893382	evm.model.000008F_PILON.144	XP_011448284.1	PREDICTED:_ligand_of_Numb_protein_X_2_isoform_X2__[Crassostrea_gigas]	sp|Q8N448|LNX2_HUMAN	Ligand_of_Numb_protein_X_2_OS=Homo_sapiens_OX=9606_GN=LNX2_PE=1_SV=1	crg:105342893	K10692_ligand_of_Numb_protein_X_1/2_[EC:2.3.2.27]_|_(RefSeq)_ligand_of_Numb_protein_X_2_isoform_X1_(A)	YES
HiC_scaffold_10	27863021	intron_variant	NA	27797950	27893382	evm.model.000008F_PILON.144	XP_011448284.1	PREDICTED:_ligand_of_Numb_protein_X_2_isoform_X2__[Crassostrea_gigas]	sp|Q8N448|LNX2_HUMAN	Ligand_of_Numb_protein_X_2_OS=Homo_sapiens_OX=9606_GN=LNX2_PE=1_SV=1	crg:105342893	K10692_ligand_of_Numb_protein_X_1/2_[EC:2.3.2.27]_|_(RefSeq)_ligand_of_Numb_protein_X_2_isoform_X1_(A)	YES
HiC_scaffold_10	27871202	intron_variant	NA	27797950	27893382	evm.model.000008F_PILON.144	XP_011448284.1	PREDICTED:_ligand_of_Numb_protein_X_2_isoform_X2__[Crassostrea_gigas]	sp|Q8N448|LNX2_HUMAN	Ligand_of_Numb_protein_X_2_OS=Homo_sapiens_OX=9606_GN=LNX2_PE=1_SV=1	crg:105342893	K10692_ligand_of_Numb_protein_X_1/2_[EC:2.3.2.27]_|_(RefSeq)_ligand_of_Numb_protein_X_2_isoform_X1_(A)	YES
HiC_scaffold_10	27871205	intron_variant	NA	27797950	27893382	evm.model.000008F_PILON.144	XP_011448284.1	PREDICTED:_ligand_of_Numb_protein_X_2_isoform_X2__[Crassostrea_gigas]	sp|Q8N448|LNX2_HUMAN	Ligand_of_Numb_protein_X_2_OS=Homo_sapiens_OX=9606_GN=LNX2_PE=1_SV=1	crg:105342893	K10692_ligand_of_Numb_protein_X_1/2_[EC:2.3.2.27]_|_(RefSeq)_ligand_of_Numb_protein_X_2_isoform_X1_(A)	YES
HiC_scaffold_10	27907688	intergenic_region	NA	27797950	27893382	evm.model.000008F_PILON.144	XP_011448284.1	PREDICTED:_ligand_of_Numb_protein_X_2_isoform_X2__[Crassostrea_gigas]	sp|Q8N448|LNX2_HUMAN	Ligand_of_Numb_protein_X_2_OS=Homo_sapiens_OX=9606_GN=LNX2_PE=1_SV=1	crg:105342893	K10692_ligand_of_Numb_protein_X_1/2_[EC:2.3.2.27]_|_(RefSeq)_ligand_of_Numb_protein_X_2_isoform_X1_(A)	NO
HiC_scaffold_10	27910296	intergenic_region	NA	27797950	27893382	evm.model.000008F_PILON.144	XP_011448284.1	PREDICTED:_ligand_of_Numb_protein_X_2_isoform_X2__[Crassostrea_gigas]	sp|Q8N448|LNX2_HUMAN	Ligand_of_Numb_protein_X_2_OS=Homo_sapiens_OX=9606_GN=LNX2_PE=1_SV=1	crg:105342893	K10692_ligand_of_Numb_protein_X_1/2_[EC:2.3.2.27]_|_(RefSeq)_ligand_of_Numb_protein_X_2_isoform_X1_(A)	NO
HiC_scaffold_10	27910305	intergenic_region	NA	27797950	27893382	evm.model.000008F_PILON.144	XP_011448284.1	PREDICTED:_ligand_of_Numb_protein_X_2_isoform_X2__[Crassostrea_gigas]	sp|Q8N448|LNX2_HUMAN	Ligand_of_Numb_protein_X_2_OS=Homo_sapiens_OX=9606_GN=LNX2_PE=1_SV=1	crg:105342893	K10692_ligand_of_Numb_protein_X_1/2_[EC:2.3.2.27]_|_(RefSeq)_ligand_of_Numb_protein_X_2_isoform_X1_(A)	NO
HiC_scaffold_10	27943122	intergenic_region	NA	27797950	27893382	evm.model.000008F_PILON.144	XP_011448284.1	PREDICTED:_ligand_of_Numb_protein_X_2_isoform_X2__[Crassostrea_gigas]	sp|Q8N448|LNX2_HUMAN	Ligand_of_Numb_protein_X_2_OS=Homo_sapiens_OX=9606_GN=LNX2_PE=1_SV=1	crg:105342893	K10692_ligand_of_Numb_protein_X_1/2_[EC:2.3.2.27]_|_(RefSeq)_ligand_of_Numb_protein_X_2_isoform_X1_(A)	NO
HiC_scaffold_10	27943120	intergenic_region	NA	27797950	27893382	evm.model.000008F_PILON.144	XP_011448284.1	PREDICTED:_ligand_of_Numb_protein_X_2_isoform_X2__[Crassostrea_gigas]	sp|Q8N448|LNX2_HUMAN	Ligand_of_Numb_protein_X_2_OS=Homo_sapiens_OX=9606_GN=LNX2_PE=1_SV=1	crg:105342893	K10692_ligand_of_Numb_protein_X_1/2_[EC:2.3.2.27]_|_(RefSeq)_ligand_of_Numb_protein_X_2_isoform_X1_(A)	NO
HiC_scaffold_10	27970879	intergenic_region	NA	27797950	27893382	evm.model.000008F_PILON.144	XP_011448284.1	PREDICTED:_ligand_of_Numb_protein_X_2_isoform_X2__[Crassostrea_gigas]	sp|Q8N448|LNX2_HUMAN	Ligand_of_Numb_protein_X_2_OS=Homo_sapiens_OX=9606_GN=LNX2_PE=1_SV=1	crg:105342893	K10692_ligand_of_Numb_protein_X_1/2_[EC:2.3.2.27]_|_(RefSeq)_ligand_of_Numb_protein_X_2_isoform_X1_(A)	NO
HiC_scaffold_10	27970841	intergenic_region	NA	27797950	27893382	evm.model.000008F_PILON.144	XP_011448284.1	PREDICTED:_ligand_of_Numb_protein_X_2_isoform_X2__[Crassostrea_gigas]	sp|Q8N448|LNX2_HUMAN	Ligand_of_Numb_protein_X_2_OS=Homo_sapiens_OX=9606_GN=LNX2_PE=1_SV=1	crg:105342893	K10692_ligand_of_Numb_protein_X_1/2_[EC:2.3.2.27]_|_(RefSeq)_ligand_of_Numb_protein_X_2_isoform_X1_(A)	NO
HiC_scaffold_10	27993474	downstream_gene_variant	NA	27989699	27990922	evm.model.000008F_PILON.145	XP_014369222.1	PREDICTED:_uncharacterized_protein_LOC106719400__[Papilio_machaon]	sp|Q03400|SANT_PLAF7	S-antigen_protein_OS=Plasmodium_falciparum_(isolate_3D7)_OX=36329_GN=PF10_0343_PE=2_SV=2	npr:108796840	K04596_adhesion_G_protein-coupled_receptor_B1_|_(RefSeq)_brain-specific_angiogenesis_inhibitor_1-like_(A)	NO
HiC_scaffold_10	28021815	intergenic_region	NA	27989699	27990922	evm.model.000008F_PILON.145	XP_014369222.1	PREDICTED:_uncharacterized_protein_LOC106719400__[Papilio_machaon]	sp|Q03400|SANT_PLAF7	S-antigen_protein_OS=Plasmodium_falciparum_(isolate_3D7)_OX=36329_GN=PF10_0343_PE=2_SV=2	npr:108796840	K04596_adhesion_G_protein-coupled_receptor_B1_|_(RefSeq)_brain-specific_angiogenesis_inhibitor_1-like_(A)	NO
HiC_scaffold_10	28021816	intergenic_region	NA	27989699	27990922	evm.model.000008F_PILON.145	XP_014369222.1	PREDICTED:_uncharacterized_protein_LOC106719400__[Papilio_machaon]	sp|Q03400|SANT_PLAF7	S-antigen_protein_OS=Plasmodium_falciparum_(isolate_3D7)_OX=36329_GN=PF10_0343_PE=2_SV=2	npr:108796840	K04596_adhesion_G_protein-coupled_receptor_B1_|_(RefSeq)_brain-specific_angiogenesis_inhibitor_1-like_(A)	NO
HiC_scaffold_10	28021842	intergenic_region	NA	27989699	27990922	evm.model.000008F_PILON.145	XP_014369222.1	PREDICTED:_uncharacterized_protein_LOC106719400__[Papilio_machaon]	sp|Q03400|SANT_PLAF7	S-antigen_protein_OS=Plasmodium_falciparum_(isolate_3D7)_OX=36329_GN=PF10_0343_PE=2_SV=2	npr:108796840	K04596_adhesion_G_protein-coupled_receptor_B1_|_(RefSeq)_brain-specific_angiogenesis_inhibitor_1-like_(A)	NO
HiC_scaffold_10	28021782	intergenic_region	NA	27989699	27990922	evm.model.000008F_PILON.145	XP_014369222.1	PREDICTED:_uncharacterized_protein_LOC106719400__[Papilio_machaon]	sp|Q03400|SANT_PLAF7	S-antigen_protein_OS=Plasmodium_falciparum_(isolate_3D7)_OX=36329_GN=PF10_0343_PE=2_SV=2	npr:108796840	K04596_adhesion_G_protein-coupled_receptor_B1_|_(RefSeq)_brain-specific_angiogenesis_inhibitor_1-like_(A)	NO
HiC_scaffold_10	28021776	intergenic_region	NA	27989699	27990922	evm.model.000008F_PILON.145	XP_014369222.1	PREDICTED:_uncharacterized_protein_LOC106719400__[Papilio_machaon]	sp|Q03400|SANT_PLAF7	S-antigen_protein_OS=Plasmodium_falciparum_(isolate_3D7)_OX=36329_GN=PF10_0343_PE=2_SV=2	npr:108796840	K04596_adhesion_G_protein-coupled_receptor_B1_|_(RefSeq)_brain-specific_angiogenesis_inhibitor_1-like_(A)	NO
HiC_scaffold_10	29003347	intergenic_region	NA	28970611	28971575	evm.model.000086F_PILON.51	XP_021367170.1	uncharacterized_protein_LOC110459277__[Mizuhopecten_yessoensis]	NA	NA	crg:105340692	K00548_5-methyltetrahydrofolate--homocysteine_methyltransferase_[EC:2.1.1.13]_|_(RefSeq)_methionine_synthase_(A)	NO
HiC_scaffold_10	29053389	intergenic_region	NA	28970611	28971575	evm.model.000086F_PILON.51	XP_021367170.1	uncharacterized_protein_LOC110459277__[Mizuhopecten_yessoensis]	NA	NA	crg:105340692	K00548_5-methyltetrahydrofolate--homocysteine_methyltransferase_[EC:2.1.1.13]_|_(RefSeq)_methionine_synthase_(A)	NO
HiC_scaffold_10	29053405	intergenic_region	NA	28970611	28971575	evm.model.000086F_PILON.51	XP_021367170.1	uncharacterized_protein_LOC110459277__[Mizuhopecten_yessoensis]	NA	NA	crg:105340692	K00548_5-methyltetrahydrofolate--homocysteine_methyltransferase_[EC:2.1.1.13]_|_(RefSeq)_methionine_synthase_(A)	NO
HiC_scaffold_10	29072886	upstream_gene_variant	NA	29071257	29071661	evm.model.000086F_PILON.50	XP_024117558.1	uncharacterized_protein_LOC112139090_isoform_X3__[Oryzias_melastigma]	NA	NA	aml:105238027	K21125_mucin-5AC_|_(RefSeq)_MUC5AC;_mucin_5AC,_oligomeric_mucus/gel-forming_(A)	NO
HiC_scaffold_10	29074047	upstream_gene_variant	NA	29071257	29071661	evm.model.000086F_PILON.50	XP_024117558.1	uncharacterized_protein_LOC112139090_isoform_X3__[Oryzias_melastigma]	NA	NA	aml:105238027	K21125_mucin-5AC_|_(RefSeq)_MUC5AC;_mucin_5AC,_oligomeric_mucus/gel-forming_(A)	NO
HiC_scaffold_10	29509604	downstream_gene_variant	NA	29504366	29511709	evm.model.000086F_PILON.32	XP_021377616.1	nitric_oxide_synthase-interacting_protein-like__[Mizuhopecten_yessoensis]	sp|Q6P829|NOSIP_XENTR	Nitric_oxide_synthase-interacting_protein_OS=Xenopus_tropicalis_OX=8364_GN=nosip_PE=2_SV=1	myi:110465831	K13125_nitric_oxide_synthase-interacting_protein_|_(RefSeq)_nitric_oxide_synthase-interacting_protein-like_(A)	YES
HiC_scaffold_10	29511451	3_prime_UTR_variant	NA	29504366	29511709	evm.model.000086F_PILON.32	XP_021377616.1	nitric_oxide_synthase-interacting_protein-like__[Mizuhopecten_yessoensis]	sp|Q6P829|NOSIP_XENTR	Nitric_oxide_synthase-interacting_protein_OS=Xenopus_tropicalis_OX=8364_GN=nosip_PE=2_SV=1	myi:110465831	K13125_nitric_oxide_synthase-interacting_protein_|_(RefSeq)_nitric_oxide_synthase-interacting_protein-like_(A)	YES
HiC_scaffold_10	29520423	upstream_gene_variant	NA	29511494	29520570	evm.model.000086F_PILON.31	XP_021377743.1	vesicle-associated_membrane_protein_3-like_isoform_X1__[Mizuhopecten_yessoensis]	sp|Q9M376|VA727_ARATH	Vesicle-associated_membrane_protein_727_OS=Arabidopsis_thaliana_OX=3702_GN=VAMP727_PE=1_SV=1	myi:110465909	K08513_vesicle-associated_membrane_protein_4_|_(RefSeq)_vesicle-associated_membrane_protein_3-like_isoform_X1_(A)	YES
HiC_scaffold_10	29541608	intron_variant	NA	29522457	29545352	evm.model.000086F_PILON.30	XP_021377442.1	importin-7-like__[Mizuhopecten_yessoensis]	sp|Q9EPL8|IPO7_MOUSE	Importin-7_OS=Mus_musculus_OX=10090_GN=Ipo7_PE=1_SV=2	myi:110465733	K20223_importin-7_|_(RefSeq)_importin-7-like_(A)	YES
HiC_scaffold_10	29541593	intron_variant	NA	29522457	29545352	evm.model.000086F_PILON.30	XP_021377442.1	importin-7-like__[Mizuhopecten_yessoensis]	sp|Q9EPL8|IPO7_MOUSE	Importin-7_OS=Mus_musculus_OX=10090_GN=Ipo7_PE=1_SV=2	myi:110465733	K20223_importin-7_|_(RefSeq)_importin-7-like_(A)	YES
HiC_scaffold_10	29541642	intron_variant	NA	29522457	29545352	evm.model.000086F_PILON.30	XP_021377442.1	importin-7-like__[Mizuhopecten_yessoensis]	sp|Q9EPL8|IPO7_MOUSE	Importin-7_OS=Mus_musculus_OX=10090_GN=Ipo7_PE=1_SV=2	myi:110465733	K20223_importin-7_|_(RefSeq)_importin-7-like_(A)	YES
HiC_scaffold_10	29541670	intron_variant	NA	29522457	29545352	evm.model.000086F_PILON.30	XP_021377442.1	importin-7-like__[Mizuhopecten_yessoensis]	sp|Q9EPL8|IPO7_MOUSE	Importin-7_OS=Mus_musculus_OX=10090_GN=Ipo7_PE=1_SV=2	myi:110465733	K20223_importin-7_|_(RefSeq)_importin-7-like_(A)	YES
HiC_scaffold_10	29556917	intron_variant	NA	29551357	29557699	evm.model.000086F_PILON.29	XP_021377561.1	tankyrase-2-like_isoform_X2__[Mizuhopecten_yessoensis]	sp|Q02357|ANK1_MOUSE	Ankyrin-1_OS=Mus_musculus_OX=10090_GN=Ank1_PE=1_SV=2	epz:103552877	K10380_ankyrin_|_(RefSeq)_ANK1;_ankyrin_1_(A)	YES
HiC_scaffold_10	29556926	intron_variant	NA	29551357	29557699	evm.model.000086F_PILON.29	XP_021377561.1	tankyrase-2-like_isoform_X2__[Mizuhopecten_yessoensis]	sp|Q02357|ANK1_MOUSE	Ankyrin-1_OS=Mus_musculus_OX=10090_GN=Ank1_PE=1_SV=2	epz:103552877	K10380_ankyrin_|_(RefSeq)_ANK1;_ankyrin_1_(A)	YES
HiC_scaffold_10	29702753	intron_variant	NA	29693505	29729878	evm.model.000086F_PILON.24	XP_021359614.1	inactive_phospholipase_C-like_protein_2_isoform_X2__[Mizuhopecten_yessoensis]	sp|Q9UPR0|PLCL2_HUMAN	Inactive_phospholipase_C-like_protein_2_OS=Homo_sapiens_OX=9606_GN=PLCL2_PE=1_SV=2	myi:110454443	K15370_inactive_phospholipase_C-like_protein_2_|_(RefSeq)_inactive_phospholipase_C-like_protein_2_isoform_X1_(A)	YES
HiC_scaffold_10	29702751	intron_variant	NA	29693505	29729878	evm.model.000086F_PILON.24	XP_021359614.1	inactive_phospholipase_C-like_protein_2_isoform_X2__[Mizuhopecten_yessoensis]	sp|Q9UPR0|PLCL2_HUMAN	Inactive_phospholipase_C-like_protein_2_OS=Homo_sapiens_OX=9606_GN=PLCL2_PE=1_SV=2	myi:110454443	K15370_inactive_phospholipase_C-like_protein_2_|_(RefSeq)_inactive_phospholipase_C-like_protein_2_isoform_X1_(A)	YES
HiC_scaffold_10	29702736	intron_variant	NA	29693505	29729878	evm.model.000086F_PILON.24	XP_021359614.1	inactive_phospholipase_C-like_protein_2_isoform_X2__[Mizuhopecten_yessoensis]	sp|Q9UPR0|PLCL2_HUMAN	Inactive_phospholipase_C-like_protein_2_OS=Homo_sapiens_OX=9606_GN=PLCL2_PE=1_SV=2	myi:110454443	K15370_inactive_phospholipase_C-like_protein_2_|_(RefSeq)_inactive_phospholipase_C-like_protein_2_isoform_X1_(A)	YES
HiC_scaffold_10	29724342	intron_variant	NA	29693505	29729878	evm.model.000086F_PILON.24	XP_021359614.1	inactive_phospholipase_C-like_protein_2_isoform_X2__[Mizuhopecten_yessoensis]	sp|Q9UPR0|PLCL2_HUMAN	Inactive_phospholipase_C-like_protein_2_OS=Homo_sapiens_OX=9606_GN=PLCL2_PE=1_SV=2	myi:110454443	K15370_inactive_phospholipase_C-like_protein_2_|_(RefSeq)_inactive_phospholipase_C-like_protein_2_isoform_X1_(A)	YES
HiC_scaffold_10	29724341	intron_variant	NA	29693505	29729878	evm.model.000086F_PILON.24	XP_021359614.1	inactive_phospholipase_C-like_protein_2_isoform_X2__[Mizuhopecten_yessoensis]	sp|Q9UPR0|PLCL2_HUMAN	Inactive_phospholipase_C-like_protein_2_OS=Homo_sapiens_OX=9606_GN=PLCL2_PE=1_SV=2	myi:110454443	K15370_inactive_phospholipase_C-like_protein_2_|_(RefSeq)_inactive_phospholipase_C-like_protein_2_isoform_X1_(A)	YES
HiC_scaffold_10	29724323	intron_variant	NA	29693505	29729878	evm.model.000086F_PILON.24	XP_021359614.1	inactive_phospholipase_C-like_protein_2_isoform_X2__[Mizuhopecten_yessoensis]	sp|Q9UPR0|PLCL2_HUMAN	Inactive_phospholipase_C-like_protein_2_OS=Homo_sapiens_OX=9606_GN=PLCL2_PE=1_SV=2	myi:110454443	K15370_inactive_phospholipase_C-like_protein_2_|_(RefSeq)_inactive_phospholipase_C-like_protein_2_isoform_X1_(A)	YES
HiC_scaffold_10	29766457	intron_variant	NA	29743033	29769828	evm.model.000086F_PILON.20	OWF47362.1	Inactive_phospholipase_C-like_protein_1__[Mizuhopecten_yessoensis]	sp|Q15111|PLCL1_HUMAN	Inactive_phospholipase_C-like_protein_1_OS=Homo_sapiens_OX=9606_GN=PLCL1_PE=1_SV=3	myi:110454444	K15370_inactive_phospholipase_C-like_protein_2_|_(RefSeq)_inactive_phospholipase_C-like_protein_1_(A)	YES
HiC_scaffold_10	30453306	intergenic_region	NA	30391351	30393789	evm.model.000577F_PILON.42	RMC22775.1	hypothetical_protein_DUI87_00223__[Hirundo_rustica_rustica]	sp|Q874R4|PFL3_SCHPO	Putative_cell_agglutination_protein_pfl3_OS=Schizosaccharomyces_pombe_(strain_972_/_ATCC_24843)_OX=284812_GN=pfl3_PE=3_SV=1	fab:101818944	K03006_DNA-directed_RNA_polymerase_II_subunit_RPB1_[EC:2.7.7.6]_|_(RefSeq)_DNA-directed_RNA_polymerase_II_subunit_RPB1-like_(A)	NO
HiC_scaffold_10	30476946	intron_variant	NA	30474379	30480671	evm.model.000577F_PILON.39	XP_021349467.1	tRNA_(guanine-N(7)-)-methyltransferase_non-catalytic_subunit_wdr4-like__[Mizuhopecten_yessoensis]	sp|A4IGH4|WDR4_DANRE	tRNA_(guanine-N(7)-)-methyltransferase_non-catalytic_subunit_wdr4_OS=Danio_rerio_OX=7955_GN=wdr4_PE=2_SV=2	myi:110447846	K15443_tRNA_(guanine-N(7)-)-methyltransferase_subunit_TRM82_|_(RefSeq)_tRNA_(guanine-N(7)-)-methyltransferase_non-catalytic_subunit_wdr4-like_(A)	YES
HiC_scaffold_10	30476962	intron_variant	NA	30474379	30480671	evm.model.000577F_PILON.39	XP_021349467.1	tRNA_(guanine-N(7)-)-methyltransferase_non-catalytic_subunit_wdr4-like__[Mizuhopecten_yessoensis]	sp|A4IGH4|WDR4_DANRE	tRNA_(guanine-N(7)-)-methyltransferase_non-catalytic_subunit_wdr4_OS=Danio_rerio_OX=7955_GN=wdr4_PE=2_SV=2	myi:110447846	K15443_tRNA_(guanine-N(7)-)-methyltransferase_subunit_TRM82_|_(RefSeq)_tRNA_(guanine-N(7)-)-methyltransferase_non-catalytic_subunit_wdr4-like_(A)	YES
HiC_scaffold_10	30476909	intron_variant	NA	30474379	30480671	evm.model.000577F_PILON.39	XP_021349467.1	tRNA_(guanine-N(7)-)-methyltransferase_non-catalytic_subunit_wdr4-like__[Mizuhopecten_yessoensis]	sp|A4IGH4|WDR4_DANRE	tRNA_(guanine-N(7)-)-methyltransferase_non-catalytic_subunit_wdr4_OS=Danio_rerio_OX=7955_GN=wdr4_PE=2_SV=2	myi:110447846	K15443_tRNA_(guanine-N(7)-)-methyltransferase_subunit_TRM82_|_(RefSeq)_tRNA_(guanine-N(7)-)-methyltransferase_non-catalytic_subunit_wdr4-like_(A)	YES
HiC_scaffold_10	30476894	intron_variant	NA	30474379	30480671	evm.model.000577F_PILON.39	XP_021349467.1	tRNA_(guanine-N(7)-)-methyltransferase_non-catalytic_subunit_wdr4-like__[Mizuhopecten_yessoensis]	sp|A4IGH4|WDR4_DANRE	tRNA_(guanine-N(7)-)-methyltransferase_non-catalytic_subunit_wdr4_OS=Danio_rerio_OX=7955_GN=wdr4_PE=2_SV=2	myi:110447846	K15443_tRNA_(guanine-N(7)-)-methyltransferase_subunit_TRM82_|_(RefSeq)_tRNA_(guanine-N(7)-)-methyltransferase_non-catalytic_subunit_wdr4-like_(A)	YES
HiC_scaffold_10	30815691	intergenic_region	NA	30717081	30788741	evm.model.000577F_PILON.24	XP_021378924.1	uncharacterized_protein_LOC110466609_isoform_X5__[Mizuhopecten_yessoensis]	NA	NA	NA	NA	NO
HiC_scaffold_10	30815685	intergenic_region	NA	30717081	30788741	evm.model.000577F_PILON.24	XP_021378924.1	uncharacterized_protein_LOC110466609_isoform_X5__[Mizuhopecten_yessoensis]	NA	NA	NA	NA	NO
HiC_scaffold_10	30830777	intergenic_region	NA	30717081	30788741	evm.model.000577F_PILON.24	XP_021378924.1	uncharacterized_protein_LOC110466609_isoform_X5__[Mizuhopecten_yessoensis]	NA	NA	NA	NA	NO
HiC_scaffold_10	30830718	intergenic_region	NA	30717081	30788741	evm.model.000577F_PILON.24	XP_021378924.1	uncharacterized_protein_LOC110466609_isoform_X5__[Mizuhopecten_yessoensis]	NA	NA	NA	NA	NO
HiC_scaffold_10	30859795	missense_variant	MODERATE	30859178	30860110	evm.model.000577F_PILON.21	XP_021356784.1	uncharacterized_protein_LOC110452522_isoform_X2__[Mizuhopecten_yessoensis]	NA	NA	sko:102804649	K18085_myotubularin-related_protein_10/11/12_|_(RefSeq)_uncharacterized_LOC102804649_(A)	YES
HiC_scaffold_10	30859797	missense_variant	MODERATE	30859178	30860110	evm.model.000577F_PILON.21	XP_021356784.1	uncharacterized_protein_LOC110452522_isoform_X2__[Mizuhopecten_yessoensis]	NA	NA	sko:102804649	K18085_myotubularin-related_protein_10/11/12_|_(RefSeq)_uncharacterized_LOC102804649_(A)	YES
HiC_scaffold_10	31033428	downstream_gene_variant	NA	31032527	31033095	evm.model.000577F_PILON.14	ARF10204.1	hypothetical_protein_Hokovirus_1_83__[Hokovirus_HKV1]	sp|Q0P6D6|CCD15_HUMAN	Coiled-coil_domain-containing_protein_15_OS=Homo_sapiens_OX=9606_GN=CCDC15_PE=2_SV=2	lsr:110482950	K17576_protein_phosphatase_1_regulatory_subunit_37_|_(RefSeq)_PPP1R37;_protein_phosphatase_1_regulatory_subunit_37_(A)	NO
HiC_scaffold_10	31033370	downstream_gene_variant	NA	31032527	31033095	evm.model.000577F_PILON.14	ARF10204.1	hypothetical_protein_Hokovirus_1_83__[Hokovirus_HKV1]	sp|Q0P6D6|CCD15_HUMAN	Coiled-coil_domain-containing_protein_15_OS=Homo_sapiens_OX=9606_GN=CCDC15_PE=2_SV=2	lsr:110482950	K17576_protein_phosphatase_1_regulatory_subunit_37_|_(RefSeq)_PPP1R37;_protein_phosphatase_1_regulatory_subunit_37_(A)	NO
HiC_scaffold_10	31043598	intron_variant	NA	31035224	31101528	evm.model.000577F_PILON.13	XP_021377280.1	lipoxygenase_homology_domain-containing_protein_1-like_isoform_X2__[Mizuhopecten_yessoensis]	sp|Q8IVV2|LOXH1_HUMAN	Lipoxygenase_homology_domain-containing_protein_1_OS=Homo_sapiens_OX=9606_GN=LOXHD1_PE=2_SV=4	pvt:110080238	K19538_retinitis_pigmentosa_1_|_(RefSeq)_lipoxygenase_homology_domain-containing_protein_1-like_isoform_X1_(A)	YES
HiC_scaffold_10	31054027	intron_variant	NA	31035224	31101528	evm.model.000577F_PILON.13	XP_021377280.1	lipoxygenase_homology_domain-containing_protein_1-like_isoform_X2__[Mizuhopecten_yessoensis]	sp|Q8IVV2|LOXH1_HUMAN	Lipoxygenase_homology_domain-containing_protein_1_OS=Homo_sapiens_OX=9606_GN=LOXHD1_PE=2_SV=4	pvt:110080238	K19538_retinitis_pigmentosa_1_|_(RefSeq)_lipoxygenase_homology_domain-containing_protein_1-like_isoform_X1_(A)	YES
HiC_scaffold_10	31053985	intron_variant	NA	31035224	31101528	evm.model.000577F_PILON.13	XP_021377280.1	lipoxygenase_homology_domain-containing_protein_1-like_isoform_X2__[Mizuhopecten_yessoensis]	sp|Q8IVV2|LOXH1_HUMAN	Lipoxygenase_homology_domain-containing_protein_1_OS=Homo_sapiens_OX=9606_GN=LOXHD1_PE=2_SV=4	pvt:110080238	K19538_retinitis_pigmentosa_1_|_(RefSeq)_lipoxygenase_homology_domain-containing_protein_1-like_isoform_X1_(A)	YES
HiC_scaffold_10	31053978	intron_variant	NA	31035224	31101528	evm.model.000577F_PILON.13	XP_021377280.1	lipoxygenase_homology_domain-containing_protein_1-like_isoform_X2__[Mizuhopecten_yessoensis]	sp|Q8IVV2|LOXH1_HUMAN	Lipoxygenase_homology_domain-containing_protein_1_OS=Homo_sapiens_OX=9606_GN=LOXHD1_PE=2_SV=4	pvt:110080238	K19538_retinitis_pigmentosa_1_|_(RefSeq)_lipoxygenase_homology_domain-containing_protein_1-like_isoform_X1_(A)	YES
HiC_scaffold_10	31094687	intron_variant	NA	31035224	31101528	evm.model.000577F_PILON.13	XP_021377280.1	lipoxygenase_homology_domain-containing_protein_1-like_isoform_X2__[Mizuhopecten_yessoensis]	sp|Q8IVV2|LOXH1_HUMAN	Lipoxygenase_homology_domain-containing_protein_1_OS=Homo_sapiens_OX=9606_GN=LOXHD1_PE=2_SV=4	pvt:110080238	K19538_retinitis_pigmentosa_1_|_(RefSeq)_lipoxygenase_homology_domain-containing_protein_1-like_isoform_X1_(A)	YES
HiC_scaffold_10	31120862	3_prime_UTR_variant	NA	31110593	31121639	evm.model.000577F_PILON.12	OWF54987.1	Urease_accessory_protein_UreD__[Mizuhopecten_yessoensis]	sp|E0ZS45|URED_ORYSI	Urease_accessory_protein_D_OS=Oryza_sativa_subsp._indica_OX=39946_GN=URED_PE=2_SV=1	myi:110465498	K03190_urease_accessory_protein_|_(RefSeq)_urease_accessory_protein_D-like_(A)	YES
HiC_scaffold_10	31120867	3_prime_UTR_variant	NA	31110593	31121639	evm.model.000577F_PILON.12	OWF54987.1	Urease_accessory_protein_UreD__[Mizuhopecten_yessoensis]	sp|E0ZS45|URED_ORYSI	Urease_accessory_protein_D_OS=Oryza_sativa_subsp._indica_OX=39946_GN=URED_PE=2_SV=1	myi:110465498	K03190_urease_accessory_protein_|_(RefSeq)_urease_accessory_protein_D-like_(A)	YES
HiC_scaffold_10	31120839	3_prime_UTR_variant	NA	31110593	31121639	evm.model.000577F_PILON.12	OWF54987.1	Urease_accessory_protein_UreD__[Mizuhopecten_yessoensis]	sp|E0ZS45|URED_ORYSI	Urease_accessory_protein_D_OS=Oryza_sativa_subsp._indica_OX=39946_GN=URED_PE=2_SV=1	myi:110465498	K03190_urease_accessory_protein_|_(RefSeq)_urease_accessory_protein_D-like_(A)	YES
HiC_scaffold_10	31120808	synonymous_variant	LOW	31110593	31121639	evm.model.000577F_PILON.12	OWF54987.1	Urease_accessory_protein_UreD__[Mizuhopecten_yessoensis]	sp|E0ZS45|URED_ORYSI	Urease_accessory_protein_D_OS=Oryza_sativa_subsp._indica_OX=39946_GN=URED_PE=2_SV=1	myi:110465498	K03190_urease_accessory_protein_|_(RefSeq)_urease_accessory_protein_D-like_(A)	YES
HiC_scaffold_10	31171886	intron_variant	NA	31146285	31202921	evm.model.000577F_PILON.6	XP_021377248.1	C2_domain-containing_protein_5-like_isoform_X3__[Mizuhopecten_yessoensis]	sp|Q86YS7|C2CD5_HUMAN	C2_domain-containing_protein_5_OS=Homo_sapiens_OX=9606_GN=C2CD5_PE=1_SV=1	ppp:112275251	K12486_stromal_membrane-associated_protein_|_(RefSeq)_probable_ADP-ribosylation_factor_GTPase-activating_protein_AGD13_(A)	YES
HiC_scaffold_10	31178417	intron_variant	NA	31146285	31202921	evm.model.000577F_PILON.6	XP_021377248.1	C2_domain-containing_protein_5-like_isoform_X3__[Mizuhopecten_yessoensis]	sp|Q86YS7|C2CD5_HUMAN	C2_domain-containing_protein_5_OS=Homo_sapiens_OX=9606_GN=C2CD5_PE=1_SV=1	ppp:112275251	K12486_stromal_membrane-associated_protein_|_(RefSeq)_probable_ADP-ribosylation_factor_GTPase-activating_protein_AGD13_(A)	YES
HiC_scaffold_10	31178423	intron_variant	NA	31146285	31202921	evm.model.000577F_PILON.6	XP_021377248.1	C2_domain-containing_protein_5-like_isoform_X3__[Mizuhopecten_yessoensis]	sp|Q86YS7|C2CD5_HUMAN	C2_domain-containing_protein_5_OS=Homo_sapiens_OX=9606_GN=C2CD5_PE=1_SV=1	ppp:112275251	K12486_stromal_membrane-associated_protein_|_(RefSeq)_probable_ADP-ribosylation_factor_GTPase-activating_protein_AGD13_(A)	YES
HiC_scaffold_10	31178385	intron_variant	NA	31146285	31202921	evm.model.000577F_PILON.6	XP_021377248.1	C2_domain-containing_protein_5-like_isoform_X3__[Mizuhopecten_yessoensis]	sp|Q86YS7|C2CD5_HUMAN	C2_domain-containing_protein_5_OS=Homo_sapiens_OX=9606_GN=C2CD5_PE=1_SV=1	ppp:112275251	K12486_stromal_membrane-associated_protein_|_(RefSeq)_probable_ADP-ribosylation_factor_GTPase-activating_protein_AGD13_(A)	YES
HiC_scaffold_10	31178380	intron_variant	NA	31146285	31202921	evm.model.000577F_PILON.6	XP_021377248.1	C2_domain-containing_protein_5-like_isoform_X3__[Mizuhopecten_yessoensis]	sp|Q86YS7|C2CD5_HUMAN	C2_domain-containing_protein_5_OS=Homo_sapiens_OX=9606_GN=C2CD5_PE=1_SV=1	ppp:112275251	K12486_stromal_membrane-associated_protein_|_(RefSeq)_probable_ADP-ribosylation_factor_GTPase-activating_protein_AGD13_(A)	YES
HiC_scaffold_10	31178372	intron_variant	NA	31146285	31202921	evm.model.000577F_PILON.6	XP_021377248.1	C2_domain-containing_protein_5-like_isoform_X3__[Mizuhopecten_yessoensis]	sp|Q86YS7|C2CD5_HUMAN	C2_domain-containing_protein_5_OS=Homo_sapiens_OX=9606_GN=C2CD5_PE=1_SV=1	ppp:112275251	K12486_stromal_membrane-associated_protein_|_(RefSeq)_probable_ADP-ribosylation_factor_GTPase-activating_protein_AGD13_(A)	YES
HiC_scaffold_10	31418133	upstream_gene_variant	NA	31406137	31406442	evm.model.001121F_PILON.17	XP_016695677.1	PREDICTED:_formin-like_protein_20_isoform_X3__[Gossypium_hirsutum]	NA	NA	NA	NA	NO
HiC_scaffold_10	31418122	upstream_gene_variant	NA	31406137	31406442	evm.model.001121F_PILON.17	XP_016695677.1	PREDICTED:_formin-like_protein_20_isoform_X3__[Gossypium_hirsutum]	NA	NA	NA	NA	NO
HiC_scaffold_10	31418111	upstream_gene_variant	NA	31406137	31406442	evm.model.001121F_PILON.17	XP_016695677.1	PREDICTED:_formin-like_protein_20_isoform_X3__[Gossypium_hirsutum]	NA	NA	NA	NA	NO
HiC_scaffold_10	31444731	intron_variant	NA	31418755	31451433	evm.model.001121F_PILON.16	XP_013072605.1	PREDICTED:_chitinase-like_protein_PB1E7.04c,_partial__[Biomphalaria_glabrata]	sp|H2A0N4|PIF_PINMG	Protein_PIF_OS=Margaritifera_margaritifera_OX=102329_PE=1_SV=1	crg:105336346	K17495_CUB_and_sushi_domain-containing_protein_|_(RefSeq)_sushi,_von_Willebrand_factor_type_A,_EGF_and_pentraxin_domain-containing_protein_1-like_isoform_X1_(A)	YES
HiC_scaffold_10	31480619	intergenic_region	NA	31418755	31451433	evm.model.001121F_PILON.16	XP_013072605.1	PREDICTED:_chitinase-like_protein_PB1E7.04c,_partial__[Biomphalaria_glabrata]	sp|H2A0N4|PIF_PINMG	Protein_PIF_OS=Margaritifera_margaritifera_OX=102329_PE=1_SV=1	crg:105336346	K17495_CUB_and_sushi_domain-containing_protein_|_(RefSeq)_sushi,_von_Willebrand_factor_type_A,_EGF_and_pentraxin_domain-containing_protein_1-like_isoform_X1_(A)	NO
HiC_scaffold_10	31480620	intergenic_region	NA	31418755	31451433	evm.model.001121F_PILON.16	XP_013072605.1	PREDICTED:_chitinase-like_protein_PB1E7.04c,_partial__[Biomphalaria_glabrata]	sp|H2A0N4|PIF_PINMG	Protein_PIF_OS=Margaritifera_margaritifera_OX=102329_PE=1_SV=1	crg:105336346	K17495_CUB_and_sushi_domain-containing_protein_|_(RefSeq)_sushi,_von_Willebrand_factor_type_A,_EGF_and_pentraxin_domain-containing_protein_1-like_isoform_X1_(A)	NO
HiC_scaffold_10	31488582	upstream_gene_variant	NA	31418755	31451433	evm.model.001121F_PILON.16	XP_013072605.1	PREDICTED:_chitinase-like_protein_PB1E7.04c,_partial__[Biomphalaria_glabrata]	sp|H2A0N4|PIF_PINMG	Protein_PIF_OS=Margaritifera_margaritifera_OX=102329_PE=1_SV=1	crg:105336346	K17495_CUB_and_sushi_domain-containing_protein_|_(RefSeq)_sushi,_von_Willebrand_factor_type_A,_EGF_and_pentraxin_domain-containing_protein_1-like_isoform_X1_(A)	NO
HiC_scaffold_10	32102989	intergenic_region	NA	32051494	32057245	evm.model.006025F_PILON.1	NA	NA	NA	NA	NA	NA	NO
HiC_scaffold_10	32103014	intergenic_region	NA	32051494	32057245	evm.model.006025F_PILON.1	NA	NA	NA	NA	NA	NA	NO
HiC_scaffold_10	32118812	intergenic_region	NA	32051494	32057245	evm.model.006025F_PILON.1	NA	NA	NA	NA	NA	NA	NO
HiC_scaffold_10	32118824	intergenic_region	NA	32051494	32057245	evm.model.006025F_PILON.1	NA	NA	NA	NA	NA	NA	NO
HiC_scaffold_10	32118754	intergenic_region	NA	32051494	32057245	evm.model.006025F_PILON.1	NA	NA	NA	NA	NA	NA	NO
HiC_scaffold_10	32134312	intergenic_region	NA	32051494	32057245	evm.model.006025F_PILON.1	NA	NA	NA	NA	NA	NA	NO
HiC_scaffold_10	32145742	intergenic_region	NA	32051494	32057245	evm.model.006025F_PILON.1	NA	NA	NA	NA	NA	NA	NO
HiC_scaffold_10	32145765	intergenic_region	NA	32051494	32057245	evm.model.006025F_PILON.1	NA	NA	NA	NA	NA	NA	NO
HiC_scaffold_10	32145696	intergenic_region	NA	32051494	32057245	evm.model.006025F_PILON.1	NA	NA	NA	NA	NA	NA	NO
HiC_scaffold_10	32165426	intergenic_region	NA	32051494	32057245	evm.model.006025F_PILON.1	NA	NA	NA	NA	NA	NA	NO
HiC_scaffold_10	32177757	downstream_gene_variant	NA	32051494	32057245	evm.model.006025F_PILON.1	NA	NA	NA	NA	NA	NA	NO
HiC_scaffold_10	32183765	intron_variant	NA	32179340	32203945	evm.model.000675F_PILON.41.1	XP_011447537.1	PREDICTED:_fatty_acyl-CoA_reductase_1__[Crassostrea_gigas]	sp|Q5R834|FACR1_PONAB	Fatty_acyl-CoA_reductase_1_OS=Pongo_abelii_OX=9601_GN=FAR1_PE=2_SV=1	myi:110459899	K13356_alcohol-forming_fatty_acyl-CoA_reductase_[EC:1.2.1.84]_|_(RefSeq)_fatty_acyl-CoA_reductase_1-like_isoform_X1_(A)	YES
HiC_scaffold_10	32197806	upstream_gene_variant	NA	32179340	32203945	evm.model.000675F_PILON.41.1	XP_011447537.1	PREDICTED:_fatty_acyl-CoA_reductase_1__[Crassostrea_gigas]	sp|Q5R834|FACR1_PONAB	Fatty_acyl-CoA_reductase_1_OS=Pongo_abelii_OX=9601_GN=FAR1_PE=2_SV=1	myi:110459899	K13356_alcohol-forming_fatty_acyl-CoA_reductase_[EC:1.2.1.84]_|_(RefSeq)_fatty_acyl-CoA_reductase_1-like_isoform_X1_(A)	YES
HiC_scaffold_10	32910284	intron_variant	NA	32896228	32911474	evm.model.000675F_PILON.2	XP_021347998.1	protein_lin-9_homolog_isoform_X2__[Mizuhopecten_yessoensis]	sp|Q4R8N2|LIN9_MACFA	Protein_lin-9_homolog_OS=Macaca_fascicularis_OX=9541_GN=LIN9_PE=2_SV=1	myi:110446970	K21773_protein_lin-9_|_(RefSeq)_protein_lin-9_homolog_isoform_X1_(A)	YES
HiC_scaffold_10	32910263	intron_variant	NA	32896228	32911474	evm.model.000675F_PILON.2	XP_021347998.1	protein_lin-9_homolog_isoform_X2__[Mizuhopecten_yessoensis]	sp|Q4R8N2|LIN9_MACFA	Protein_lin-9_homolog_OS=Macaca_fascicularis_OX=9541_GN=LIN9_PE=2_SV=1	myi:110446970	K21773_protein_lin-9_|_(RefSeq)_protein_lin-9_homolog_isoform_X1_(A)	YES
HiC_scaffold_10	32912688	upstream_gene_variant	NA	32896228	32911474	evm.model.000675F_PILON.2	XP_021347998.1	protein_lin-9_homolog_isoform_X2__[Mizuhopecten_yessoensis]	sp|Q4R8N2|LIN9_MACFA	Protein_lin-9_homolog_OS=Macaca_fascicularis_OX=9541_GN=LIN9_PE=2_SV=1	myi:110446970	K21773_protein_lin-9_|_(RefSeq)_protein_lin-9_homolog_isoform_X1_(A)	NO
HiC_scaffold_10	32923700	downstream_gene_variant	NA	32915376	32920612	evm.model.000675F_PILON.1	WP_053092065.1	accessory_Sec-dependent_serine-rich_glycoprotein_adhesin__[Streptococcus_parasanguinis]	sp|Q9W596|FUTSC_DROME	Microtubule-associated_protein_futsch_OS=Drosophila_melanogaster_OX=7227_GN=futsch_PE=1_SV=4	sasa:106591863	K11976_E3_ubiquitin-protein_ligase_RNF216_[EC:2.3.2.31]_|_(RefSeq)_E3_ubiquitin-protein_ligase_RNF216-like_(A)	NO
HiC_scaffold_10	32923680	downstream_gene_variant	NA	32915376	32920612	evm.model.000675F_PILON.1	WP_053092065.1	accessory_Sec-dependent_serine-rich_glycoprotein_adhesin__[Streptococcus_parasanguinis]	sp|Q9W596|FUTSC_DROME	Microtubule-associated_protein_futsch_OS=Drosophila_melanogaster_OX=7227_GN=futsch_PE=1_SV=4	sasa:106591863	K11976_E3_ubiquitin-protein_ligase_RNF216_[EC:2.3.2.31]_|_(RefSeq)_E3_ubiquitin-protein_ligase_RNF216-like_(A)	NO
HiC_scaffold_10	32968660	synonymous_variant	LOW	32968122	32988348	evm.model.002511F_PILON.2	RFU29819.1	hypothetical_protein_B7463_g6518,_partial__[Scytalidium_lignicola]	sp|Q658N2|WSCD1_HUMAN	WSC_domain-containing_protein_1_OS=Homo_sapiens_OX=9606_GN=WSCD1_PE=2_SV=1	lgi:LOTGIDRAFT_160629	K22144_cell_surface_hyaluronidase_[EC:3.2.1.35]_|_(RefSeq)_hypothetical_protein_(A)	YES
HiC_scaffold_10	33601081	missense_variant	MODERATE	33592349	33629770	evm.model.000565F_PILON.20	XP_021348021.1	uncharacterized_protein_LOC110446984__[Mizuhopecten_yessoensis]	sp|Q8N2E2|VWDE_HUMAN	von_Willebrand_factor_D_and_EGF_domain-containing_protein_OS=Homo_sapiens_OX=9606_GN=VWDE_PE=2_SV=4	crg:105324777	K10955_mucin-2_|_(RefSeq)_uncharacterized_protein_LOC105324777_(A)	YES
HiC_scaffold_10	33620615	intron_variant	NA	33592349	33629770	evm.model.000565F_PILON.20	XP_021348021.1	uncharacterized_protein_LOC110446984__[Mizuhopecten_yessoensis]	sp|Q8N2E2|VWDE_HUMAN	von_Willebrand_factor_D_and_EGF_domain-containing_protein_OS=Homo_sapiens_OX=9606_GN=VWDE_PE=2_SV=4	crg:105324777	K10955_mucin-2_|_(RefSeq)_uncharacterized_protein_LOC105324777_(A)	YES
HiC_scaffold_10	33641882	intron_variant	NA	33636069	33663429	evm.model.000565F_PILON.21	XP_021347984.1	protein_XRP2-like_isoform_X1__[Mizuhopecten_yessoensis]	sp|Q5ZHN4|XRP2_CHICK	Protein_XRP2_OS=Gallus_gallus_OX=9031_GN=RP2_PE=2_SV=3	myi:110446963	K18272_protein_XRP2_|_(RefSeq)_protein_XRP2-like_isoform_X1_(A)	YES
HiC_scaffold_10	33658810	synonymous_variant	LOW	33636069	33663429	evm.model.000565F_PILON.21	XP_021347984.1	protein_XRP2-like_isoform_X1__[Mizuhopecten_yessoensis]	sp|Q5ZHN4|XRP2_CHICK	Protein_XRP2_OS=Gallus_gallus_OX=9031_GN=RP2_PE=2_SV=3	myi:110446963	K18272_protein_XRP2_|_(RefSeq)_protein_XRP2-like_isoform_X1_(A)	YES
HiC_scaffold_10	33686317	synonymous_variant	LOW	33686224	33690648	evm.model.000565F_PILON.23	OWF51939.1	Mitotic-spindle_organizing_protein_1__[Mizuhopecten_yessoensis]	sp|Q8BUR9|MZT1_MOUSE	Mitotic-spindle_organizing_protein_1_OS=Mus_musculus_OX=10090_GN=Mzt1_PE=1_SV=1	lgi:LOTGIDRAFT_223273	K18633_mitotic-spindle_organizing_protein_1_|_(RefSeq)_hypothetical_protein_(A)	YES
HiC_scaffold_10	33686637	stop_gained	HIGH	33686224	33690648	evm.model.000565F_PILON.23	OWF51939.1	Mitotic-spindle_organizing_protein_1__[Mizuhopecten_yessoensis]	sp|Q8BUR9|MZT1_MOUSE	Mitotic-spindle_organizing_protein_1_OS=Mus_musculus_OX=10090_GN=Mzt1_PE=1_SV=1	lgi:LOTGIDRAFT_223273	K18633_mitotic-spindle_organizing_protein_1_|_(RefSeq)_hypothetical_protein_(A)	YES
HiC_scaffold_10	34636413	intergenic_region	NA	34613225	34613692	evm.model.000109F_PILON.20	NA	NA	NA	NA	NA	NA	NO
HiC_scaffold_10	34636447	intergenic_region	NA	34613225	34613692	evm.model.000109F_PILON.20	NA	NA	NA	NA	NA	NA	NO
HiC_scaffold_10	34668901	intergenic_region	NA	34613225	34613692	evm.model.000109F_PILON.20	NA	NA	NA	NA	NA	NA	NO
HiC_scaffold_10	34670209	intergenic_region	NA	34613225	34613692	evm.model.000109F_PILON.20	NA	NA	NA	NA	NA	NA	NO
HiC_scaffold_10	34670678	intergenic_region	NA	34613225	34613692	evm.model.000109F_PILON.20	NA	NA	NA	NA	NA	NA	NO
HiC_scaffold_10	34670698	intergenic_region	NA	34613225	34613692	evm.model.000109F_PILON.20	NA	NA	NA	NA	NA	NA	NO
HiC_scaffold_10	34912145	intergenic_region	NA	34887083	34896828	evm.model.000109F_PILON.12	XP_021355582.1	myb-related_transcription_factor,_partner_of_profilin-like__[Mizuhopecten_yessoensis]	NA	NA	myi:110451740	K23221_nuclear_apoptosis-inducing_factor_1_|_(RefSeq)_myb-related_transcription_factor,_partner_of_profilin-like_(A)	NO
HiC_scaffold_10	34912130	intergenic_region	NA	34887083	34896828	evm.model.000109F_PILON.12	XP_021355582.1	myb-related_transcription_factor,_partner_of_profilin-like__[Mizuhopecten_yessoensis]	NA	NA	myi:110451740	K23221_nuclear_apoptosis-inducing_factor_1_|_(RefSeq)_myb-related_transcription_factor,_partner_of_profilin-like_(A)	NO
HiC_scaffold_10	34959861	intergenic_region	NA	34927692	34928875	evm.model.000109F_PILON.11	XP_021357227.1	zinc_finger_protein_862-like__[Mizuhopecten_yessoensis]	sp|O60290|ZN862_HUMAN	Zinc_finger_protein_862_OS=Homo_sapiens_OX=9606_GN=ZNF862_PE=2_SV=2	hmg:100204771	K14685_solute_carrier_family_40_(iron-regulated_transporter),_member_1_|_(RefSeq)_uncharacterized_LOC100204771_(A)	NO
HiC_scaffold_10	34959865	intergenic_region	NA	34927692	34928875	evm.model.000109F_PILON.11	XP_021357227.1	zinc_finger_protein_862-like__[Mizuhopecten_yessoensis]	sp|O60290|ZN862_HUMAN	Zinc_finger_protein_862_OS=Homo_sapiens_OX=9606_GN=ZNF862_PE=2_SV=2	hmg:100204771	K14685_solute_carrier_family_40_(iron-regulated_transporter),_member_1_|_(RefSeq)_uncharacterized_LOC100204771_(A)	NO
HiC_scaffold_10	34981604	intron_variant	NA	34965258	34988870	evm.model.000109F_PILON.9	XP_021350289.1	ras-related_and_estrogen-regulated_growth_inhibitor-like__[Mizuhopecten_yessoensis]	sp|Q0VCJ7|RERG_BOVIN	Ras-related_and_estrogen-regulated_growth_inhibitor_OS=Bos_taurus_OX=9913_GN=RERG_PE=2_SV=1	myi:110448397	K07855_Ras-related_and_estrogen-regulated_growth_inhibitor_|_(RefSeq)_ras-related_and_estrogen-regulated_growth_inhibitor-like_(A)	YES
HiC_scaffold_10	34981547	intron_variant	NA	34965258	34988870	evm.model.000109F_PILON.9	XP_021350289.1	ras-related_and_estrogen-regulated_growth_inhibitor-like__[Mizuhopecten_yessoensis]	sp|Q0VCJ7|RERG_BOVIN	Ras-related_and_estrogen-regulated_growth_inhibitor_OS=Bos_taurus_OX=9913_GN=RERG_PE=2_SV=1	myi:110448397	K07855_Ras-related_and_estrogen-regulated_growth_inhibitor_|_(RefSeq)_ras-related_and_estrogen-regulated_growth_inhibitor-like_(A)	YES
HiC_scaffold_10	34981536	intron_variant	NA	34965258	34988870	evm.model.000109F_PILON.9	XP_021350289.1	ras-related_and_estrogen-regulated_growth_inhibitor-like__[Mizuhopecten_yessoensis]	sp|Q0VCJ7|RERG_BOVIN	Ras-related_and_estrogen-regulated_growth_inhibitor_OS=Bos_taurus_OX=9913_GN=RERG_PE=2_SV=1	myi:110448397	K07855_Ras-related_and_estrogen-regulated_growth_inhibitor_|_(RefSeq)_ras-related_and_estrogen-regulated_growth_inhibitor-like_(A)	YES
HiC_scaffold_10	35034651	upstream_gene_variant	NA	34965258	34988870	evm.model.000109F_PILON.9	XP_021350289.1	ras-related_and_estrogen-regulated_growth_inhibitor-like__[Mizuhopecten_yessoensis]	sp|Q0VCJ7|RERG_BOVIN	Ras-related_and_estrogen-regulated_growth_inhibitor_OS=Bos_taurus_OX=9913_GN=RERG_PE=2_SV=1	myi:110448397	K07855_Ras-related_and_estrogen-regulated_growth_inhibitor_|_(RefSeq)_ras-related_and_estrogen-regulated_growth_inhibitor-like_(A)	NO
HiC_scaffold_10	35046988	downstream_gene_variant	NA	35038473	35042216	evm.model.000109F_PILON.5	XP_021350290.1	uncharacterized_protein_LOC110448398__[Mizuhopecten_yessoensis]	sp|Q96LM5|CD045_HUMAN	Uncharacterized_protein_C4orf45_OS=Homo_sapiens_OX=9606_GN=C4orf45_PE=2_SV=3	NA	NA	NO
HiC_scaffold_10	35062601	intergenic_region	NA	35038473	35042216	evm.model.000109F_PILON.5	XP_021350290.1	uncharacterized_protein_LOC110448398__[Mizuhopecten_yessoensis]	sp|Q96LM5|CD045_HUMAN	Uncharacterized_protein_C4orf45_OS=Homo_sapiens_OX=9606_GN=C4orf45_PE=2_SV=3	NA	NA	NO
HiC_scaffold_10	35062614	intergenic_region	NA	35038473	35042216	evm.model.000109F_PILON.5	XP_021350290.1	uncharacterized_protein_LOC110448398__[Mizuhopecten_yessoensis]	sp|Q96LM5|CD045_HUMAN	Uncharacterized_protein_C4orf45_OS=Homo_sapiens_OX=9606_GN=C4orf45_PE=2_SV=3	NA	NA	NO
HiC_scaffold_10	35085706	intergenic_region	NA	35078731	35080616	evm.model.000109F_PILON.2	XP_021350325.1	uncharacterized_protein_LOC110448423_isoform_X2__[Mizuhopecten_yessoensis]	NA	NA	NA	NA	NO
HiC_scaffold_10	35098390	downstream_gene_variant	NA	35078731	35080616	evm.model.000109F_PILON.2	XP_021350325.1	uncharacterized_protein_LOC110448423_isoform_X2__[Mizuhopecten_yessoensis]	NA	NA	NA	NA	NO
HiC_scaffold_10	35421169	intron_variant	NA	35410769	35424643	evm.model.001039F_PILON.27	OWF52378.1	ATP-dependent_RNA_helicase_Dhx29__[Mizuhopecten_yessoensis]	sp|Q6PGC1|DHX29_MOUSE	ATP-dependent_RNA_helicase_DHX29_OS=Mus_musculus_OX=10090_GN=Dhx29_PE=1_SV=1	myi:110447858	K18995_ATP-dependent_RNA_helicase_DHX29_[EC:3.6.4.13]_|_(RefSeq)_ATP-dependent_RNA_helicase_DHX29-like_(A)	YES
HiC_scaffold_10	35421182	intron_variant	NA	35410769	35424643	evm.model.001039F_PILON.27	OWF52378.1	ATP-dependent_RNA_helicase_Dhx29__[Mizuhopecten_yessoensis]	sp|Q6PGC1|DHX29_MOUSE	ATP-dependent_RNA_helicase_DHX29_OS=Mus_musculus_OX=10090_GN=Dhx29_PE=1_SV=1	myi:110447858	K18995_ATP-dependent_RNA_helicase_DHX29_[EC:3.6.4.13]_|_(RefSeq)_ATP-dependent_RNA_helicase_DHX29-like_(A)	YES
HiC_scaffold_10	35421126	intron_variant	NA	35410769	35424643	evm.model.001039F_PILON.27	OWF52378.1	ATP-dependent_RNA_helicase_Dhx29__[Mizuhopecten_yessoensis]	sp|Q6PGC1|DHX29_MOUSE	ATP-dependent_RNA_helicase_DHX29_OS=Mus_musculus_OX=10090_GN=Dhx29_PE=1_SV=1	myi:110447858	K18995_ATP-dependent_RNA_helicase_DHX29_[EC:3.6.4.13]_|_(RefSeq)_ATP-dependent_RNA_helicase_DHX29-like_(A)	YES
HiC_scaffold_10	35435918	intergenic_region	NA	35410769	35424643	evm.model.001039F_PILON.27	OWF52378.1	ATP-dependent_RNA_helicase_Dhx29__[Mizuhopecten_yessoensis]	sp|Q6PGC1|DHX29_MOUSE	ATP-dependent_RNA_helicase_DHX29_OS=Mus_musculus_OX=10090_GN=Dhx29_PE=1_SV=1	myi:110447858	K18995_ATP-dependent_RNA_helicase_DHX29_[EC:3.6.4.13]_|_(RefSeq)_ATP-dependent_RNA_helicase_DHX29-like_(A)	NO
HiC_scaffold_10	35487626	upstream_gene_variant	NA	35466213	35483501	evm.model.001039F_PILON.25	XP_021349438.1	beta-hexosaminidase_subunit_beta-like__[Mizuhopecten_yessoensis]	sp|P07686|HEXB_HUMAN	Beta-hexosaminidase_subunit_beta_OS=Homo_sapiens_OX=9606_GN=HEXB_PE=1_SV=3	pcan:112576421	K12373_hexosaminidase_[EC:3.2.1.52]_|_(RefSeq)_LOW_QUALITY_PROTEIN:_beta-hexosaminidase_subunit_alpha-like_(A)	NO
HiC_scaffold_10	35512279	intergenic_region	NA	35466213	35483501	evm.model.001039F_PILON.25	XP_021349438.1	beta-hexosaminidase_subunit_beta-like__[Mizuhopecten_yessoensis]	sp|P07686|HEXB_HUMAN	Beta-hexosaminidase_subunit_beta_OS=Homo_sapiens_OX=9606_GN=HEXB_PE=1_SV=3	pcan:112576421	K12373_hexosaminidase_[EC:3.2.1.52]_|_(RefSeq)_LOW_QUALITY_PROTEIN:_beta-hexosaminidase_subunit_alpha-like_(A)	NO
HiC_scaffold_10	35517038	intergenic_region	NA	35466213	35483501	evm.model.001039F_PILON.25	XP_021349438.1	beta-hexosaminidase_subunit_beta-like__[Mizuhopecten_yessoensis]	sp|P07686|HEXB_HUMAN	Beta-hexosaminidase_subunit_beta_OS=Homo_sapiens_OX=9606_GN=HEXB_PE=1_SV=3	pcan:112576421	K12373_hexosaminidase_[EC:3.2.1.52]_|_(RefSeq)_LOW_QUALITY_PROTEIN:_beta-hexosaminidase_subunit_alpha-like_(A)	NO
HiC_scaffold_10	35519647	intergenic_region	NA	35466213	35483501	evm.model.001039F_PILON.25	XP_021349438.1	beta-hexosaminidase_subunit_beta-like__[Mizuhopecten_yessoensis]	sp|P07686|HEXB_HUMAN	Beta-hexosaminidase_subunit_beta_OS=Homo_sapiens_OX=9606_GN=HEXB_PE=1_SV=3	pcan:112576421	K12373_hexosaminidase_[EC:3.2.1.52]_|_(RefSeq)_LOW_QUALITY_PROTEIN:_beta-hexosaminidase_subunit_alpha-like_(A)	NO
HiC_scaffold_10	35533496	upstream_gene_variant	NA	35529011	35529541	evm.model.001039F_PILON.9	OWF37349.1	Acetylcholine_receptor_subunit_beta__[Mizuhopecten_yessoensis]	sp|O95264|5HT3B_HUMAN	5-hydroxytryptamine_receptor_3B_OS=Homo_sapiens_OX=9606_GN=HTR3B_PE=1_SV=1	myi:110452062	K04809_nicotinic_acetylcholine_receptor_alpha-7_|_(RefSeq)_neuronal_acetylcholine_receptor_subunit_alpha-7-like_(A)	NO
HiC_scaffold_10	35538856	intergenic_region	NA	35529011	35529541	evm.model.001039F_PILON.9	OWF37349.1	Acetylcholine_receptor_subunit_beta__[Mizuhopecten_yessoensis]	sp|O95264|5HT3B_HUMAN	5-hydroxytryptamine_receptor_3B_OS=Homo_sapiens_OX=9606_GN=HTR3B_PE=1_SV=1	myi:110452062	K04809_nicotinic_acetylcholine_receptor_alpha-7_|_(RefSeq)_neuronal_acetylcholine_receptor_subunit_alpha-7-like_(A)	NO
HiC_scaffold_10	35538870	intergenic_region	NA	35529011	35529541	evm.model.001039F_PILON.9	OWF37349.1	Acetylcholine_receptor_subunit_beta__[Mizuhopecten_yessoensis]	sp|O95264|5HT3B_HUMAN	5-hydroxytryptamine_receptor_3B_OS=Homo_sapiens_OX=9606_GN=HTR3B_PE=1_SV=1	myi:110452062	K04809_nicotinic_acetylcholine_receptor_alpha-7_|_(RefSeq)_neuronal_acetylcholine_receptor_subunit_alpha-7-like_(A)	NO
HiC_scaffold_10	35538877	intergenic_region	NA	35529011	35529541	evm.model.001039F_PILON.9	OWF37349.1	Acetylcholine_receptor_subunit_beta__[Mizuhopecten_yessoensis]	sp|O95264|5HT3B_HUMAN	5-hydroxytryptamine_receptor_3B_OS=Homo_sapiens_OX=9606_GN=HTR3B_PE=1_SV=1	myi:110452062	K04809_nicotinic_acetylcholine_receptor_alpha-7_|_(RefSeq)_neuronal_acetylcholine_receptor_subunit_alpha-7-like_(A)	NO
HiC_scaffold_10	35538820	intergenic_region	NA	35529011	35529541	evm.model.001039F_PILON.9	OWF37349.1	Acetylcholine_receptor_subunit_beta__[Mizuhopecten_yessoensis]	sp|O95264|5HT3B_HUMAN	5-hydroxytryptamine_receptor_3B_OS=Homo_sapiens_OX=9606_GN=HTR3B_PE=1_SV=1	myi:110452062	K04809_nicotinic_acetylcholine_receptor_alpha-7_|_(RefSeq)_neuronal_acetylcholine_receptor_subunit_alpha-7-like_(A)	NO
HiC_scaffold_10	35550731	intergenic_region	NA	35529011	35529541	evm.model.001039F_PILON.9	OWF37349.1	Acetylcholine_receptor_subunit_beta__[Mizuhopecten_yessoensis]	sp|O95264|5HT3B_HUMAN	5-hydroxytryptamine_receptor_3B_OS=Homo_sapiens_OX=9606_GN=HTR3B_PE=1_SV=1	myi:110452062	K04809_nicotinic_acetylcholine_receptor_alpha-7_|_(RefSeq)_neuronal_acetylcholine_receptor_subunit_alpha-7-like_(A)	NO
HiC_scaffold_10	35550729	intergenic_region	NA	35529011	35529541	evm.model.001039F_PILON.9	OWF37349.1	Acetylcholine_receptor_subunit_beta__[Mizuhopecten_yessoensis]	sp|O95264|5HT3B_HUMAN	5-hydroxytryptamine_receptor_3B_OS=Homo_sapiens_OX=9606_GN=HTR3B_PE=1_SV=1	myi:110452062	K04809_nicotinic_acetylcholine_receptor_alpha-7_|_(RefSeq)_neuronal_acetylcholine_receptor_subunit_alpha-7-like_(A)	NO
HiC_scaffold_10	35559331	intergenic_region	NA	35529011	35529541	evm.model.001039F_PILON.9	OWF37349.1	Acetylcholine_receptor_subunit_beta__[Mizuhopecten_yessoensis]	sp|O95264|5HT3B_HUMAN	5-hydroxytryptamine_receptor_3B_OS=Homo_sapiens_OX=9606_GN=HTR3B_PE=1_SV=1	myi:110452062	K04809_nicotinic_acetylcholine_receptor_alpha-7_|_(RefSeq)_neuronal_acetylcholine_receptor_subunit_alpha-7-like_(A)	NO
HiC_scaffold_10	35604722	upstream_gene_variant	NA	35573690	35585843	evm.model.001039F_PILON.8	XP_021338948.1	probable_cytochrome_P450_12d1_proximal,_mitochondrial__[Mizuhopecten_yessoensis]	sp|P82712|CCD1P_DROME	Probable_cytochrome_P450_12d1_proximal,_mitochondrial_OS=Drosophila_melanogaster_OX=7227_GN=Cyp12d1-p_PE=2_SV=3	crg:105340526	K15004_cytochrome_P450_family_12_[EC:1.14.-.-]_|_(RefSeq)_cytochrome_P450_27C1_(A)	NO
HiC_scaffold_10	35604727	upstream_gene_variant	NA	35573690	35585843	evm.model.001039F_PILON.8	XP_021338948.1	probable_cytochrome_P450_12d1_proximal,_mitochondrial__[Mizuhopecten_yessoensis]	sp|P82712|CCD1P_DROME	Probable_cytochrome_P450_12d1_proximal,_mitochondrial_OS=Drosophila_melanogaster_OX=7227_GN=Cyp12d1-p_PE=2_SV=3	crg:105340526	K15004_cytochrome_P450_family_12_[EC:1.14.-.-]_|_(RefSeq)_cytochrome_P450_27C1_(A)	NO
HiC_scaffold_10	35604750	upstream_gene_variant	NA	35573690	35585843	evm.model.001039F_PILON.8	XP_021338948.1	probable_cytochrome_P450_12d1_proximal,_mitochondrial__[Mizuhopecten_yessoensis]	sp|P82712|CCD1P_DROME	Probable_cytochrome_P450_12d1_proximal,_mitochondrial_OS=Drosophila_melanogaster_OX=7227_GN=Cyp12d1-p_PE=2_SV=3	crg:105340526	K15004_cytochrome_P450_family_12_[EC:1.14.-.-]_|_(RefSeq)_cytochrome_P450_27C1_(A)	NO
HiC_scaffold_10	35604705	upstream_gene_variant	NA	35573690	35585843	evm.model.001039F_PILON.8	XP_021338948.1	probable_cytochrome_P450_12d1_proximal,_mitochondrial__[Mizuhopecten_yessoensis]	sp|P82712|CCD1P_DROME	Probable_cytochrome_P450_12d1_proximal,_mitochondrial_OS=Drosophila_melanogaster_OX=7227_GN=Cyp12d1-p_PE=2_SV=3	crg:105340526	K15004_cytochrome_P450_family_12_[EC:1.14.-.-]_|_(RefSeq)_cytochrome_P450_27C1_(A)	NO
HiC_scaffold_10	35645985	intergenic_region	NA	35621724	35622574	evm.model.001039F_PILON.6	XP_011665910.1	PREDICTED:_uncharacterized_protein_LOC588801__[Strongylocentrotus_purpuratus]	sp|Q02290|XYNB_NEOPA	Endo-1,4-beta-xylanase_B_OS=Neocallimastix_patriciarum_OX=4758_GN=xynB_PE=2_SV=1	bim:100745452	K09312_homeobox_protein_CDX1/4_|_(RefSeq)_homeobox_protein_abdominal-B_isoform_X1_(A)	NO
HiC_scaffold_10	35645972	intergenic_region	NA	35621724	35622574	evm.model.001039F_PILON.6	XP_011665910.1	PREDICTED:_uncharacterized_protein_LOC588801__[Strongylocentrotus_purpuratus]	sp|Q02290|XYNB_NEOPA	Endo-1,4-beta-xylanase_B_OS=Neocallimastix_patriciarum_OX=4758_GN=xynB_PE=2_SV=1	bim:100745452	K09312_homeobox_protein_CDX1/4_|_(RefSeq)_homeobox_protein_abdominal-B_isoform_X1_(A)	NO
HiC_scaffold_10	35653348	intergenic_region	NA	35621724	35622574	evm.model.001039F_PILON.6	XP_011665910.1	PREDICTED:_uncharacterized_protein_LOC588801__[Strongylocentrotus_purpuratus]	sp|Q02290|XYNB_NEOPA	Endo-1,4-beta-xylanase_B_OS=Neocallimastix_patriciarum_OX=4758_GN=xynB_PE=2_SV=1	bim:100745452	K09312_homeobox_protein_CDX1/4_|_(RefSeq)_homeobox_protein_abdominal-B_isoform_X1_(A)	NO
HiC_scaffold_10	35674365	intron_variant	NA	35668513	35681426	evm.model.001039F_PILON.4	XP_021338938.1	uncharacterized_protein_LOC110440291__[Mizuhopecten_yessoensis]	NA	NA	NA	NA	YES
HiC_scaffold_10	35674356	intron_variant	NA	35668513	35681426	evm.model.001039F_PILON.4	XP_021338938.1	uncharacterized_protein_LOC110440291__[Mizuhopecten_yessoensis]	NA	NA	NA	NA	YES
HiC_scaffold_10	35698641	intron_variant	NA	35698035	35702433	evm.model.001039F_PILON.2	XP_021353423.1	mediator_of_RNA_polymerase_II_transcription_subunit_18-like__[Mizuhopecten_yessoensis]	sp|Q0VCD4|MED18_BOVIN	Mediator_of_RNA_polymerase_II_transcription_subunit_18_OS=Bos_taurus_OX=9913_GN=MED18_PE=2_SV=1	myi:110450291	K15135_mediator_of_RNA_polymerase_II_transcription_subunit_18_|_(RefSeq)_mediator_of_RNA_polymerase_II_transcription_subunit_18-like_(A)	YES
HiC_scaffold_10	35706810	downstream_gene_variant	NA	35698035	35702433	evm.model.001039F_PILON.2	XP_021353423.1	mediator_of_RNA_polymerase_II_transcription_subunit_18-like__[Mizuhopecten_yessoensis]	sp|Q0VCD4|MED18_BOVIN	Mediator_of_RNA_polymerase_II_transcription_subunit_18_OS=Bos_taurus_OX=9913_GN=MED18_PE=2_SV=1	myi:110450291	K15135_mediator_of_RNA_polymerase_II_transcription_subunit_18_|_(RefSeq)_mediator_of_RNA_polymerase_II_transcription_subunit_18-like_(A)	NO
HiC_scaffold_10	35706757	downstream_gene_variant	NA	35698035	35702433	evm.model.001039F_PILON.2	XP_021353423.1	mediator_of_RNA_polymerase_II_transcription_subunit_18-like__[Mizuhopecten_yessoensis]	sp|Q0VCD4|MED18_BOVIN	Mediator_of_RNA_polymerase_II_transcription_subunit_18_OS=Bos_taurus_OX=9913_GN=MED18_PE=2_SV=1	myi:110450291	K15135_mediator_of_RNA_polymerase_II_transcription_subunit_18_|_(RefSeq)_mediator_of_RNA_polymerase_II_transcription_subunit_18-like_(A)	NO
HiC_scaffold_10	35706738	downstream_gene_variant	NA	35698035	35702433	evm.model.001039F_PILON.2	XP_021353423.1	mediator_of_RNA_polymerase_II_transcription_subunit_18-like__[Mizuhopecten_yessoensis]	sp|Q0VCD4|MED18_BOVIN	Mediator_of_RNA_polymerase_II_transcription_subunit_18_OS=Bos_taurus_OX=9913_GN=MED18_PE=2_SV=1	myi:110450291	K15135_mediator_of_RNA_polymerase_II_transcription_subunit_18_|_(RefSeq)_mediator_of_RNA_polymerase_II_transcription_subunit_18-like_(A)	NO
HiC_scaffold_10	35774786	intergenic_region	NA	35709289	35721477	evm.model.001039F_PILON.1	XP_021353398.1	CD82_antigen-like__[Mizuhopecten_yessoensis]	sp|P27701|CD82_HUMAN	CD82_antigen_OS=Homo_sapiens_OX=9606_GN=CD82_PE=1_SV=1	crg:105340494	K06509_CD82_antigen_|_(RefSeq)_CD82_antigen_(A)	NO
HiC_scaffold_10	35774773	intergenic_region	NA	35709289	35721477	evm.model.001039F_PILON.1	XP_021353398.1	CD82_antigen-like__[Mizuhopecten_yessoensis]	sp|P27701|CD82_HUMAN	CD82_antigen_OS=Homo_sapiens_OX=9606_GN=CD82_PE=1_SV=1	crg:105340494	K06509_CD82_antigen_|_(RefSeq)_CD82_antigen_(A)	NO
HiC_scaffold_10	35900508	downstream_gene_variant	NA	35873668	35874090	evm.model.000110F_PILON.1	XP_021353420.1	lazarillo_protein-like__[Mizuhopecten_yessoensis]	NA	NA	myi:110450289	K03098_apolipoprotein_D_and_lipocalin_family_protein_|_(RefSeq)_lazarillo_protein-like_(A)	NO
HiC_scaffold_10	35900457	downstream_gene_variant	NA	35873668	35874090	evm.model.000110F_PILON.1	XP_021353420.1	lazarillo_protein-like__[Mizuhopecten_yessoensis]	NA	NA	myi:110450289	K03098_apolipoprotein_D_and_lipocalin_family_protein_|_(RefSeq)_lazarillo_protein-like_(A)	NO
HiC_scaffold_10	35900456	downstream_gene_variant	NA	35873668	35874090	evm.model.000110F_PILON.1	XP_021353420.1	lazarillo_protein-like__[Mizuhopecten_yessoensis]	NA	NA	myi:110450289	K03098_apolipoprotein_D_and_lipocalin_family_protein_|_(RefSeq)_lazarillo_protein-like_(A)	NO
HiC_scaffold_10	35934943	synonymous_variant	LOW	35915330	35966822	evm.model.000110F_PILON.3	XP_021373688.1	low-density_lipoprotein_receptor-related_protein_4-like_isoform_X2__[Mizuhopecten_yessoensis]	sp|O75096|LRP4_HUMAN	Low-density_lipoprotein_receptor-related_protein_4_OS=Homo_sapiens_OX=9606_GN=LRP4_PE=1_SV=4	myi:110463424	K20051_low-density_lipoprotein_receptor-related_protein_4_|_(RefSeq)_low-density_lipoprotein_receptor-related_protein_4-like_isoform_X1_(A)	YES
HiC_scaffold_10	35934916	intron_variant	NA	35915330	35966822	evm.model.000110F_PILON.3	XP_021373688.1	low-density_lipoprotein_receptor-related_protein_4-like_isoform_X2__[Mizuhopecten_yessoensis]	sp|O75096|LRP4_HUMAN	Low-density_lipoprotein_receptor-related_protein_4_OS=Homo_sapiens_OX=9606_GN=LRP4_PE=1_SV=4	myi:110463424	K20051_low-density_lipoprotein_receptor-related_protein_4_|_(RefSeq)_low-density_lipoprotein_receptor-related_protein_4-like_isoform_X1_(A)	YES
HiC_scaffold_10	35934900	intron_variant	NA	35915330	35966822	evm.model.000110F_PILON.3	XP_021373688.1	low-density_lipoprotein_receptor-related_protein_4-like_isoform_X2__[Mizuhopecten_yessoensis]	sp|O75096|LRP4_HUMAN	Low-density_lipoprotein_receptor-related_protein_4_OS=Homo_sapiens_OX=9606_GN=LRP4_PE=1_SV=4	myi:110463424	K20051_low-density_lipoprotein_receptor-related_protein_4_|_(RefSeq)_low-density_lipoprotein_receptor-related_protein_4-like_isoform_X1_(A)	YES
HiC_scaffold_10	35946927	intron_variant	NA	35915330	35966822	evm.model.000110F_PILON.3	XP_021373688.1	low-density_lipoprotein_receptor-related_protein_4-like_isoform_X2__[Mizuhopecten_yessoensis]	sp|O75096|LRP4_HUMAN	Low-density_lipoprotein_receptor-related_protein_4_OS=Homo_sapiens_OX=9606_GN=LRP4_PE=1_SV=4	myi:110463424	K20051_low-density_lipoprotein_receptor-related_protein_4_|_(RefSeq)_low-density_lipoprotein_receptor-related_protein_4-like_isoform_X1_(A)	YES
HiC_scaffold_10	35973677	intergenic_region	NA	35915330	35966822	evm.model.000110F_PILON.3	XP_021373688.1	low-density_lipoprotein_receptor-related_protein_4-like_isoform_X2__[Mizuhopecten_yessoensis]	sp|O75096|LRP4_HUMAN	Low-density_lipoprotein_receptor-related_protein_4_OS=Homo_sapiens_OX=9606_GN=LRP4_PE=1_SV=4	myi:110463424	K20051_low-density_lipoprotein_receptor-related_protein_4_|_(RefSeq)_low-density_lipoprotein_receptor-related_protein_4-like_isoform_X1_(A)	NO
HiC_scaffold_10	35973680	intergenic_region	NA	35915330	35966822	evm.model.000110F_PILON.3	XP_021373688.1	low-density_lipoprotein_receptor-related_protein_4-like_isoform_X2__[Mizuhopecten_yessoensis]	sp|O75096|LRP4_HUMAN	Low-density_lipoprotein_receptor-related_protein_4_OS=Homo_sapiens_OX=9606_GN=LRP4_PE=1_SV=4	myi:110463424	K20051_low-density_lipoprotein_receptor-related_protein_4_|_(RefSeq)_low-density_lipoprotein_receptor-related_protein_4-like_isoform_X1_(A)	NO
HiC_scaffold_10	35973693	intergenic_region	NA	35915330	35966822	evm.model.000110F_PILON.3	XP_021373688.1	low-density_lipoprotein_receptor-related_protein_4-like_isoform_X2__[Mizuhopecten_yessoensis]	sp|O75096|LRP4_HUMAN	Low-density_lipoprotein_receptor-related_protein_4_OS=Homo_sapiens_OX=9606_GN=LRP4_PE=1_SV=4	myi:110463424	K20051_low-density_lipoprotein_receptor-related_protein_4_|_(RefSeq)_low-density_lipoprotein_receptor-related_protein_4-like_isoform_X1_(A)	NO
HiC_scaffold_10	35993615	upstream_gene_variant	NA	35991648	36001507	evm.model.000110F_PILON.5	KFD48130.1	hypothetical_protein_M513_11011__[Trichuris_suis]	NA	NA	pss:102460466	K09228_KRAB_domain-containing_zinc_finger_protein_|_(RefSeq)_zinc_finger_protein_208-like_(A)	YES
HiC_scaffold_10	36311596	intron_variant	NA	36305821	36376470	evm.model.000110F_PILON.20.1	XP_021371541.1	vinculin-like_isoform_X17__[Mizuhopecten_yessoensis]	sp|O46037|VINC_DROME	Vinculin_OS=Drosophila_melanogaster_OX=7227_GN=Vinc_PE=1_SV=1	myi:110462068	K05700_vinculin_|_(RefSeq)_vinculin-like_isoform_X1_(A)	YES
HiC_scaffold_10	36347083	missense_variant	MODERATE	36305821	36376470	evm.model.000110F_PILON.20.1	XP_021371541.1	vinculin-like_isoform_X17__[Mizuhopecten_yessoensis]	sp|O46037|VINC_DROME	Vinculin_OS=Drosophila_melanogaster_OX=7227_GN=Vinc_PE=1_SV=1	myi:110462068	K05700_vinculin_|_(RefSeq)_vinculin-like_isoform_X1_(A)	YES
HiC_scaffold_10	36347050	synonymous_variant	LOW	36305821	36376470	evm.model.000110F_PILON.20.1	XP_021371541.1	vinculin-like_isoform_X17__[Mizuhopecten_yessoensis]	sp|O46037|VINC_DROME	Vinculin_OS=Drosophila_melanogaster_OX=7227_GN=Vinc_PE=1_SV=1	myi:110462068	K05700_vinculin_|_(RefSeq)_vinculin-like_isoform_X1_(A)	YES
HiC_scaffold_10	36372793	3_prime_UTR_variant	NA	36305821	36376470	evm.model.000110F_PILON.20.1	XP_021371541.1	vinculin-like_isoform_X17__[Mizuhopecten_yessoensis]	sp|O46037|VINC_DROME	Vinculin_OS=Drosophila_melanogaster_OX=7227_GN=Vinc_PE=1_SV=1	myi:110462068	K05700_vinculin_|_(RefSeq)_vinculin-like_isoform_X1_(A)	YES
HiC_scaffold_10	36372790	3_prime_UTR_variant	NA	36305821	36376470	evm.model.000110F_PILON.20.1	XP_021371541.1	vinculin-like_isoform_X17__[Mizuhopecten_yessoensis]	sp|O46037|VINC_DROME	Vinculin_OS=Drosophila_melanogaster_OX=7227_GN=Vinc_PE=1_SV=1	myi:110462068	K05700_vinculin_|_(RefSeq)_vinculin-like_isoform_X1_(A)	YES
HiC_scaffold_10	36710530	3_prime_UTR_variant	NA	36703604	36710672	evm.model.000110F_PILON.45	XP_021342620.1	cell_death_abnormality_protein_1-like__[Mizuhopecten_yessoensis]	NA	NA	NA	NA	YES
HiC_scaffold_10	36710504	3_prime_UTR_variant	NA	36703604	36710672	evm.model.000110F_PILON.45	XP_021342620.1	cell_death_abnormality_protein_1-like__[Mizuhopecten_yessoensis]	NA	NA	NA	NA	YES
HiC_scaffold_10	36742761	intergenic_region	NA	36714108	36732619	evm.model.000110F_PILON.46	XP_021342615.1	glycine_receptor_subunit_alphaZ1-like__[Mizuhopecten_yessoensis]	sp|Q61603|GLRA4_MOUSE	Glycine_receptor_subunit_alpha-4_OS=Mus_musculus_OX=10090_GN=Glra4_PE=1_SV=3	myi:110443005	K05195_glycine_receptor_alpha-3_|_(RefSeq)_glycine_receptor_subunit_alphaZ1-like_(A)	NO
HiC_scaffold_10	36742755	intergenic_region	NA	36714108	36732619	evm.model.000110F_PILON.46	XP_021342615.1	glycine_receptor_subunit_alphaZ1-like__[Mizuhopecten_yessoensis]	sp|Q61603|GLRA4_MOUSE	Glycine_receptor_subunit_alpha-4_OS=Mus_musculus_OX=10090_GN=Glra4_PE=1_SV=3	myi:110443005	K05195_glycine_receptor_alpha-3_|_(RefSeq)_glycine_receptor_subunit_alphaZ1-like_(A)	NO
HiC_scaffold_10	36747584	intergenic_region	NA	36714108	36732619	evm.model.000110F_PILON.46	XP_021342615.1	glycine_receptor_subunit_alphaZ1-like__[Mizuhopecten_yessoensis]	sp|Q61603|GLRA4_MOUSE	Glycine_receptor_subunit_alpha-4_OS=Mus_musculus_OX=10090_GN=Glra4_PE=1_SV=3	myi:110443005	K05195_glycine_receptor_alpha-3_|_(RefSeq)_glycine_receptor_subunit_alphaZ1-like_(A)	NO
HiC_scaffold_10	36758157	intergenic_region	NA	36714108	36732619	evm.model.000110F_PILON.46	XP_021342615.1	glycine_receptor_subunit_alphaZ1-like__[Mizuhopecten_yessoensis]	sp|Q61603|GLRA4_MOUSE	Glycine_receptor_subunit_alpha-4_OS=Mus_musculus_OX=10090_GN=Glra4_PE=1_SV=3	myi:110443005	K05195_glycine_receptor_alpha-3_|_(RefSeq)_glycine_receptor_subunit_alphaZ1-like_(A)	NO
HiC_scaffold_10	36818664	downstream_gene_variant	NA	36811991	36815352	evm.model.000110F_PILON.49	XP_022297751.1	uncharacterized_protein_LOC111107070__[Crassostrea_virginica]	NA	NA	amex:103035877	K22614_NLR_family_CARD_domain-containing_protein_3_|_(RefSeq)_LOW_QUALITY_PROTEIN:_uncharacterized_protein_LOC103035877_(A)	NO
HiC_scaffold_10	36818665	downstream_gene_variant	NA	36811991	36815352	evm.model.000110F_PILON.49	XP_022297751.1	uncharacterized_protein_LOC111107070__[Crassostrea_virginica]	NA	NA	amex:103035877	K22614_NLR_family_CARD_domain-containing_protein_3_|_(RefSeq)_LOW_QUALITY_PROTEIN:_uncharacterized_protein_LOC103035877_(A)	NO
HiC_scaffold_10	36818695	downstream_gene_variant	NA	36811991	36815352	evm.model.000110F_PILON.49	XP_022297751.1	uncharacterized_protein_LOC111107070__[Crassostrea_virginica]	NA	NA	amex:103035877	K22614_NLR_family_CARD_domain-containing_protein_3_|_(RefSeq)_LOW_QUALITY_PROTEIN:_uncharacterized_protein_LOC103035877_(A)	NO
HiC_scaffold_10	36828847	intergenic_region	NA	36811991	36815352	evm.model.000110F_PILON.49	XP_022297751.1	uncharacterized_protein_LOC111107070__[Crassostrea_virginica]	NA	NA	amex:103035877	K22614_NLR_family_CARD_domain-containing_protein_3_|_(RefSeq)_LOW_QUALITY_PROTEIN:_uncharacterized_protein_LOC103035877_(A)	NO
HiC_scaffold_10	36828849	intergenic_region	NA	36811991	36815352	evm.model.000110F_PILON.49	XP_022297751.1	uncharacterized_protein_LOC111107070__[Crassostrea_virginica]	NA	NA	amex:103035877	K22614_NLR_family_CARD_domain-containing_protein_3_|_(RefSeq)_LOW_QUALITY_PROTEIN:_uncharacterized_protein_LOC103035877_(A)	NO
HiC_scaffold_10	36846527	intergenic_region	NA	36811991	36815352	evm.model.000110F_PILON.49	XP_022297751.1	uncharacterized_protein_LOC111107070__[Crassostrea_virginica]	NA	NA	amex:103035877	K22614_NLR_family_CARD_domain-containing_protein_3_|_(RefSeq)_LOW_QUALITY_PROTEIN:_uncharacterized_protein_LOC103035877_(A)	NO
HiC_scaffold_10	36846521	intergenic_region	NA	36811991	36815352	evm.model.000110F_PILON.49	XP_022297751.1	uncharacterized_protein_LOC111107070__[Crassostrea_virginica]	NA	NA	amex:103035877	K22614_NLR_family_CARD_domain-containing_protein_3_|_(RefSeq)_LOW_QUALITY_PROTEIN:_uncharacterized_protein_LOC103035877_(A)	NO
HiC_scaffold_10	36846513	intergenic_region	NA	36811991	36815352	evm.model.000110F_PILON.49	XP_022297751.1	uncharacterized_protein_LOC111107070__[Crassostrea_virginica]	NA	NA	amex:103035877	K22614_NLR_family_CARD_domain-containing_protein_3_|_(RefSeq)_LOW_QUALITY_PROTEIN:_uncharacterized_protein_LOC103035877_(A)	NO
HiC_scaffold_10	36846640	intergenic_region	NA	36811991	36815352	evm.model.000110F_PILON.49	XP_022297751.1	uncharacterized_protein_LOC111107070__[Crassostrea_virginica]	NA	NA	amex:103035877	K22614_NLR_family_CARD_domain-containing_protein_3_|_(RefSeq)_LOW_QUALITY_PROTEIN:_uncharacterized_protein_LOC103035877_(A)	NO
HiC_scaffold_10	36908475	intron_variant	NA	36862712	36909565	evm.model.000110F_PILON.50	XP_021342588.1	tetratricopeptide_repeat_protein_17-like_isoform_X2__[Mizuhopecten_yessoensis]	sp|Q96AE7|TTC17_HUMAN	Tetratricopeptide_repeat_protein_17_OS=Homo_sapiens_OX=9606_GN=TTC17_PE=1_SV=1	NA	NA	YES
HiC_scaffold_10	36910452	upstream_gene_variant	NA	36862712	36909565	evm.model.000110F_PILON.50	XP_021342588.1	tetratricopeptide_repeat_protein_17-like_isoform_X2__[Mizuhopecten_yessoensis]	sp|Q96AE7|TTC17_HUMAN	Tetratricopeptide_repeat_protein_17_OS=Homo_sapiens_OX=9606_GN=TTC17_PE=1_SV=1	NA	NA	NO
HiC_scaffold_10	36910461	upstream_gene_variant	NA	36862712	36909565	evm.model.000110F_PILON.50	XP_021342588.1	tetratricopeptide_repeat_protein_17-like_isoform_X2__[Mizuhopecten_yessoensis]	sp|Q96AE7|TTC17_HUMAN	Tetratricopeptide_repeat_protein_17_OS=Homo_sapiens_OX=9606_GN=TTC17_PE=1_SV=1	NA	NA	NO
HiC_scaffold_10	36910462	upstream_gene_variant	NA	36862712	36909565	evm.model.000110F_PILON.50	XP_021342588.1	tetratricopeptide_repeat_protein_17-like_isoform_X2__[Mizuhopecten_yessoensis]	sp|Q96AE7|TTC17_HUMAN	Tetratricopeptide_repeat_protein_17_OS=Homo_sapiens_OX=9606_GN=TTC17_PE=1_SV=1	NA	NA	NO
HiC_scaffold_10	36910463	upstream_gene_variant	NA	36862712	36909565	evm.model.000110F_PILON.50	XP_021342588.1	tetratricopeptide_repeat_protein_17-like_isoform_X2__[Mizuhopecten_yessoensis]	sp|Q96AE7|TTC17_HUMAN	Tetratricopeptide_repeat_protein_17_OS=Homo_sapiens_OX=9606_GN=TTC17_PE=1_SV=1	NA	NA	NO
HiC_scaffold_10	36922723	intergenic_region	NA	36862712	36909565	evm.model.000110F_PILON.50	XP_021342588.1	tetratricopeptide_repeat_protein_17-like_isoform_X2__[Mizuhopecten_yessoensis]	sp|Q96AE7|TTC17_HUMAN	Tetratricopeptide_repeat_protein_17_OS=Homo_sapiens_OX=9606_GN=TTC17_PE=1_SV=1	NA	NA	NO
HiC_scaffold_10	36929264	downstream_gene_variant	NA	36862712	36909565	evm.model.000110F_PILON.50	XP_021342588.1	tetratricopeptide_repeat_protein_17-like_isoform_X2__[Mizuhopecten_yessoensis]	sp|Q96AE7|TTC17_HUMAN	Tetratricopeptide_repeat_protein_17_OS=Homo_sapiens_OX=9606_GN=TTC17_PE=1_SV=1	NA	NA	NO
HiC_scaffold_10	36929260	downstream_gene_variant	NA	36862712	36909565	evm.model.000110F_PILON.50	XP_021342588.1	tetratricopeptide_repeat_protein_17-like_isoform_X2__[Mizuhopecten_yessoensis]	sp|Q96AE7|TTC17_HUMAN	Tetratricopeptide_repeat_protein_17_OS=Homo_sapiens_OX=9606_GN=TTC17_PE=1_SV=1	NA	NA	NO
HiC_scaffold_10	36935595	intron_variant	NA	36931881	36938785	evm.model.000110F_PILON.51	XP_021342621.1	ecdysone-induced_protein_78C-like__[Mizuhopecten_yessoensis]	sp|O77245|E75_METEN	Nuclear_hormone_receptor_E75_OS=Metapenaeus_ensis_OX=32278_GN=E75_PE=2_SV=1	myi:110443008	K08701_nuclear_receptor_subfamily_1_group_D_member_3_|_(RefSeq)_ecdysone-induced_protein_78C-like_(A)	YES
HiC_scaffold_10	36958575	intron_variant	NA	36951970	36999353	evm.model.000110F_PILON.53	XP_021342627.1	DNA-binding_protein_RFX6-like__[Mizuhopecten_yessoensis]	sp|Q8C7R7|RFX6_MOUSE	DNA-binding_protein_RFX6_OS=Mus_musculus_OX=10090_GN=Rfx6_PE=1_SV=2	myi:110443013	K19521_regulatory_factor_X_6_|_(RefSeq)_DNA-binding_protein_RFX6-like_(A)	YES
HiC_scaffold_10	36958551	intron_variant	NA	36951970	36999353	evm.model.000110F_PILON.53	XP_021342627.1	DNA-binding_protein_RFX6-like__[Mizuhopecten_yessoensis]	sp|Q8C7R7|RFX6_MOUSE	DNA-binding_protein_RFX6_OS=Mus_musculus_OX=10090_GN=Rfx6_PE=1_SV=2	myi:110443013	K19521_regulatory_factor_X_6_|_(RefSeq)_DNA-binding_protein_RFX6-like_(A)	YES
HiC_scaffold_10	36974507	intron_variant	NA	36951970	36999353	evm.model.000110F_PILON.53	XP_021342627.1	DNA-binding_protein_RFX6-like__[Mizuhopecten_yessoensis]	sp|Q8C7R7|RFX6_MOUSE	DNA-binding_protein_RFX6_OS=Mus_musculus_OX=10090_GN=Rfx6_PE=1_SV=2	myi:110443013	K19521_regulatory_factor_X_6_|_(RefSeq)_DNA-binding_protein_RFX6-like_(A)	YES
HiC_scaffold_10	37509335	upstream_gene_variant	NA	37490256	37506486	evm.model.000110F_PILON.69	XP_021360170.1	mucin-6-like_isoform_X1__[Mizuhopecten_yessoensis]	NA	NA	mpha:105840022	K04365_B-Raf_proto-oncogene_serine/threonine-protein_kinase_[EC:2.7.11.1]_|_(RefSeq)_raf_homolog_serine/threonine-protein_kinase_phl_(A)	NO
HiC_scaffold_10	37529787	intron_variant	NA	37519144	37541381	evm.model.000110F_PILON.70	XP_021360172.1	inactive_hydroxysteroid_dehydrogenase-like_protein_1__[Mizuhopecten_yessoensis]	sp|Q5R7K0|HSDL1_PONAB	Inactive_hydroxysteroid_dehydrogenase-like_protein_1_OS=Pongo_abelii_OX=9601_GN=HSDL1_PE=2_SV=1	sko:100371713	K10251_17beta-estradiol_17-dehydrogenase_/_very-long-chain_3-oxoacyl-CoA_reductase_[EC:1.1.1.62_1.1.1.330]_|_(RefSeq)_estradiol_17-beta-dehydrogenase_12-B-like_(A)	YES
HiC_scaffold_10	37549594	3_prime_UTR_variant	NA	37549494	37564911	evm.model.000110F_PILON.71	XP_021360166.1	very-long-chain_3-oxoacyl-CoA_reductase-like__[Mizuhopecten_yessoensis]	sp|Q5E9H7|DHB12_BOVIN	Very-long-chain_3-oxoacyl-CoA_reductase_OS=Bos_taurus_OX=9913_GN=HSD17B12_PE=2_SV=1	myi:110454786	K10251_17beta-estradiol_17-dehydrogenase_/_very-long-chain_3-oxoacyl-CoA_reductase_[EC:1.1.1.62_1.1.1.330]_|_(RefSeq)_very-long-chain_3-oxoacyl-CoA_reductase-like_(A)	YES
HiC_scaffold_10	37569035	upstream_gene_variant	NA	37549494	37564911	evm.model.000110F_PILON.71	XP_021360166.1	very-long-chain_3-oxoacyl-CoA_reductase-like__[Mizuhopecten_yessoensis]	sp|Q5E9H7|DHB12_BOVIN	Very-long-chain_3-oxoacyl-CoA_reductase_OS=Bos_taurus_OX=9913_GN=HSD17B12_PE=2_SV=1	myi:110454786	K10251_17beta-estradiol_17-dehydrogenase_/_very-long-chain_3-oxoacyl-CoA_reductase_[EC:1.1.1.62_1.1.1.330]_|_(RefSeq)_very-long-chain_3-oxoacyl-CoA_reductase-like_(A)	NO
HiC_scaffold_10	37569040	upstream_gene_variant	NA	37549494	37564911	evm.model.000110F_PILON.71	XP_021360166.1	very-long-chain_3-oxoacyl-CoA_reductase-like__[Mizuhopecten_yessoensis]	sp|Q5E9H7|DHB12_BOVIN	Very-long-chain_3-oxoacyl-CoA_reductase_OS=Bos_taurus_OX=9913_GN=HSD17B12_PE=2_SV=1	myi:110454786	K10251_17beta-estradiol_17-dehydrogenase_/_very-long-chain_3-oxoacyl-CoA_reductase_[EC:1.1.1.62_1.1.1.330]_|_(RefSeq)_very-long-chain_3-oxoacyl-CoA_reductase-like_(A)	NO
HiC_scaffold_10	37580138	downstream_gene_variant	NA	37571290	37576682	evm.model.000110F_PILON.72	XP_021377730.1	succinate_dehydrogenase_assembly_factor_2,_mitochondrial-like__[Mizuhopecten_yessoensis]	sp|Q8C6I2|SDHF2_MOUSE	Succinate_dehydrogenase_assembly_factor_2,_mitochondrial_OS=Mus_musculus_OX=10090_GN=Sdhaf2_PE=1_SV=1	myi:110465902	K18168_succinate_dehydrogenase_assembly_factor_2_|_(RefSeq)_succinate_dehydrogenase_assembly_factor_2,_mitochondrial-like_(A)	NO
HiC_scaffold_10	37580122	downstream_gene_variant	NA	37571290	37576682	evm.model.000110F_PILON.72	XP_021377730.1	succinate_dehydrogenase_assembly_factor_2,_mitochondrial-like__[Mizuhopecten_yessoensis]	sp|Q8C6I2|SDHF2_MOUSE	Succinate_dehydrogenase_assembly_factor_2,_mitochondrial_OS=Mus_musculus_OX=10090_GN=Sdhaf2_PE=1_SV=1	myi:110465902	K18168_succinate_dehydrogenase_assembly_factor_2_|_(RefSeq)_succinate_dehydrogenase_assembly_factor_2,_mitochondrial-like_(A)	NO
HiC_scaffold_10	37586311	synonymous_variant	LOW	37580529	37591124	evm.model.000110F_PILON.73.1	ACL13150.1	cathepsin_D__[Azumapecten_farreri]	sp|Q03168|ASPP_AEDAE	Lysosomal_aspartic_protease_OS=Aedes_aegypti_OX=7159_GN=AAEL006169_PE=1_SV=2	myi:110466152	K01379_cathepsin_D_[EC:3.4.23.5]_|_(RefSeq)_lysosomal_aspartic_protease-like_(A)	YES
HiC_scaffold_10	37934110	intergenic_region	NA	37882048	37895470	evm.model.003727F_PILON.1	XP_021347337.1	uncharacterized_protein_LOC110446481_isoform_X2__[Mizuhopecten_yessoensis]	NA	NA	NA	NA	NO
HiC_scaffold_10	37934114	intergenic_region	NA	37882048	37895470	evm.model.003727F_PILON.1	XP_021347337.1	uncharacterized_protein_LOC110446481_isoform_X2__[Mizuhopecten_yessoensis]	NA	NA	NA	NA	NO
HiC_scaffold_10	37937071	intergenic_region	NA	37882048	37895470	evm.model.003727F_PILON.1	XP_021347337.1	uncharacterized_protein_LOC110446481_isoform_X2__[Mizuhopecten_yessoensis]	NA	NA	NA	NA	NO
HiC_scaffold_10	37990994	intergenic_region	NA	37953929	37975660	evm.model.000206F_PILON.79	OWF56531.1	Gamma-aminobutyric_acid_type_B_receptor_subunit_2__[Mizuhopecten_yessoensis]	sp|O75899|GABR2_HUMAN	Gamma-aminobutyric_acid_type_B_receptor_subunit_2_OS=Homo_sapiens_OX=9606_GN=GABBR2_PE=1_SV=1	myi:110446472	K04615_gamma-aminobutyric_acid_type_B_receptor_|_(RefSeq)_gamma-aminobutyric_acid_type_B_receptor_subunit_2-like_(A)	NO
HiC_scaffold_10	37998571	intergenic_region	NA	37953929	37975660	evm.model.000206F_PILON.79	OWF56531.1	Gamma-aminobutyric_acid_type_B_receptor_subunit_2__[Mizuhopecten_yessoensis]	sp|O75899|GABR2_HUMAN	Gamma-aminobutyric_acid_type_B_receptor_subunit_2_OS=Homo_sapiens_OX=9606_GN=GABBR2_PE=1_SV=1	myi:110446472	K04615_gamma-aminobutyric_acid_type_B_receptor_|_(RefSeq)_gamma-aminobutyric_acid_type_B_receptor_subunit_2-like_(A)	NO
HiC_scaffold_10	37998528	intergenic_region	NA	37953929	37975660	evm.model.000206F_PILON.79	OWF56531.1	Gamma-aminobutyric_acid_type_B_receptor_subunit_2__[Mizuhopecten_yessoensis]	sp|O75899|GABR2_HUMAN	Gamma-aminobutyric_acid_type_B_receptor_subunit_2_OS=Homo_sapiens_OX=9606_GN=GABBR2_PE=1_SV=1	myi:110446472	K04615_gamma-aminobutyric_acid_type_B_receptor_|_(RefSeq)_gamma-aminobutyric_acid_type_B_receptor_subunit_2-like_(A)	NO
HiC_scaffold_10	38803886	downstream_gene_variant	NA	38754662	38756249	evm.model.000206F_PILON.27	RMX52440.1	hypothetical_protein_pdam_00019905,_partial__[Pocillopora_damicornis]	NA	NA	lak:106156134	K23222_nuclease_HARBI1_[EC:3.1.-.-]_|_(RefSeq)_protein_ALP1-like_(A)	NO
HiC_scaffold_10	38803880	downstream_gene_variant	NA	38754662	38756249	evm.model.000206F_PILON.27	RMX52440.1	hypothetical_protein_pdam_00019905,_partial__[Pocillopora_damicornis]	NA	NA	lak:106156134	K23222_nuclease_HARBI1_[EC:3.1.-.-]_|_(RefSeq)_protein_ALP1-like_(A)	NO
HiC_scaffold_10	38811960	intron_variant	NA	38806045	38818103	evm.model.000206F_PILON.25	XP_021345503.1	putative_beta-hexosaminidase__[Mizuhopecten_yessoensis]	sp|P86956|HEX_PINMA	Putative_beta-hexosaminidase_OS=Pinctada_maxima_OX=104660_PE=1_SV=1	myi:110445288	K12373_hexosaminidase_[EC:3.2.1.52]_|_(RefSeq)_putative_beta-hexosaminidase_(A)	YES
HiC_scaffold_10	38826075	intergenic_region	NA	38806045	38818103	evm.model.000206F_PILON.25	XP_021345503.1	putative_beta-hexosaminidase__[Mizuhopecten_yessoensis]	sp|P86956|HEX_PINMA	Putative_beta-hexosaminidase_OS=Pinctada_maxima_OX=104660_PE=1_SV=1	myi:110445288	K12373_hexosaminidase_[EC:3.2.1.52]_|_(RefSeq)_putative_beta-hexosaminidase_(A)	NO
HiC_scaffold_10	38826031	intergenic_region	NA	38806045	38818103	evm.model.000206F_PILON.25	XP_021345503.1	putative_beta-hexosaminidase__[Mizuhopecten_yessoensis]	sp|P86956|HEX_PINMA	Putative_beta-hexosaminidase_OS=Pinctada_maxima_OX=104660_PE=1_SV=1	myi:110445288	K12373_hexosaminidase_[EC:3.2.1.52]_|_(RefSeq)_putative_beta-hexosaminidase_(A)	NO
HiC_scaffold_10	38826014	intergenic_region	NA	38806045	38818103	evm.model.000206F_PILON.25	XP_021345503.1	putative_beta-hexosaminidase__[Mizuhopecten_yessoensis]	sp|P86956|HEX_PINMA	Putative_beta-hexosaminidase_OS=Pinctada_maxima_OX=104660_PE=1_SV=1	myi:110445288	K12373_hexosaminidase_[EC:3.2.1.52]_|_(RefSeq)_putative_beta-hexosaminidase_(A)	NO
HiC_scaffold_10	39222096	intron_variant	NA	39220283	39242762	evm.model.000206F_PILON.4	XP_021340685.1	syndetin-like_isoform_X1__[Mizuhopecten_yessoensis]	sp|Q96JG6|VPS50_HUMAN	Syndetin_OS=Homo_sapiens_OX=9606_GN=VPS50_PE=1_SV=3	myi:110441765	K23288_syndetin_|_(RefSeq)_syndetin-like_isoform_X1_(A)	YES
HiC_scaffold_10	39222076	intron_variant	NA	39220283	39242762	evm.model.000206F_PILON.4	XP_021340685.1	syndetin-like_isoform_X1__[Mizuhopecten_yessoensis]	sp|Q96JG6|VPS50_HUMAN	Syndetin_OS=Homo_sapiens_OX=9606_GN=VPS50_PE=1_SV=3	myi:110441765	K23288_syndetin_|_(RefSeq)_syndetin-like_isoform_X1_(A)	YES
HiC_scaffold_10	39252414	intergenic_region	NA	39220283	39242762	evm.model.000206F_PILON.4	XP_021340685.1	syndetin-like_isoform_X1__[Mizuhopecten_yessoensis]	sp|Q96JG6|VPS50_HUMAN	Syndetin_OS=Homo_sapiens_OX=9606_GN=VPS50_PE=1_SV=3	myi:110441765	K23288_syndetin_|_(RefSeq)_syndetin-like_isoform_X1_(A)	NO
HiC_scaffold_10	39252389	intergenic_region	NA	39220283	39242762	evm.model.000206F_PILON.4	XP_021340685.1	syndetin-like_isoform_X1__[Mizuhopecten_yessoensis]	sp|Q96JG6|VPS50_HUMAN	Syndetin_OS=Homo_sapiens_OX=9606_GN=VPS50_PE=1_SV=3	myi:110441765	K23288_syndetin_|_(RefSeq)_syndetin-like_isoform_X1_(A)	NO
HiC_scaffold_10	39252375	intergenic_region	NA	39220283	39242762	evm.model.000206F_PILON.4	XP_021340685.1	syndetin-like_isoform_X1__[Mizuhopecten_yessoensis]	sp|Q96JG6|VPS50_HUMAN	Syndetin_OS=Homo_sapiens_OX=9606_GN=VPS50_PE=1_SV=3	myi:110441765	K23288_syndetin_|_(RefSeq)_syndetin-like_isoform_X1_(A)	NO
HiC_scaffold_10	39273824	intron_variant	NA	39270690	39285460	evm.model.000206F_PILON.2	XP_021340687.1	isocitrate_dehydrogenase_[NADP]_cytoplasmic-like__[Mizuhopecten_yessoensis]	sp|Q9Z2K9|IDHC_MICME	Isocitrate_dehydrogenase_[NADP]_cytoplasmic_OS=Microtus_mexicanus_OX=79689_GN=IDH1_PE=2_SV=1	myi:110441767	K00031_isocitrate_dehydrogenase_[EC:1.1.1.42]_|_(RefSeq)_isocitrate_dehydrogenase_[NADP]_cytoplasmic-like_(A)	YES
HiC_scaffold_10	39273832	intron_variant	NA	39270690	39285460	evm.model.000206F_PILON.2	XP_021340687.1	isocitrate_dehydrogenase_[NADP]_cytoplasmic-like__[Mizuhopecten_yessoensis]	sp|Q9Z2K9|IDHC_MICME	Isocitrate_dehydrogenase_[NADP]_cytoplasmic_OS=Microtus_mexicanus_OX=79689_GN=IDH1_PE=2_SV=1	myi:110441767	K00031_isocitrate_dehydrogenase_[EC:1.1.1.42]_|_(RefSeq)_isocitrate_dehydrogenase_[NADP]_cytoplasmic-like_(A)	YES
[truncated: 632 more rows]
