# Supplementary figures and images for: Heterogeneous Genomic Divergence Landscape in Two Commercially Important European Scallop Species
Source: MDPI journal article supplement (doi:10.3390/genes14010014), 2022-12-21

(a) *P. maximus*

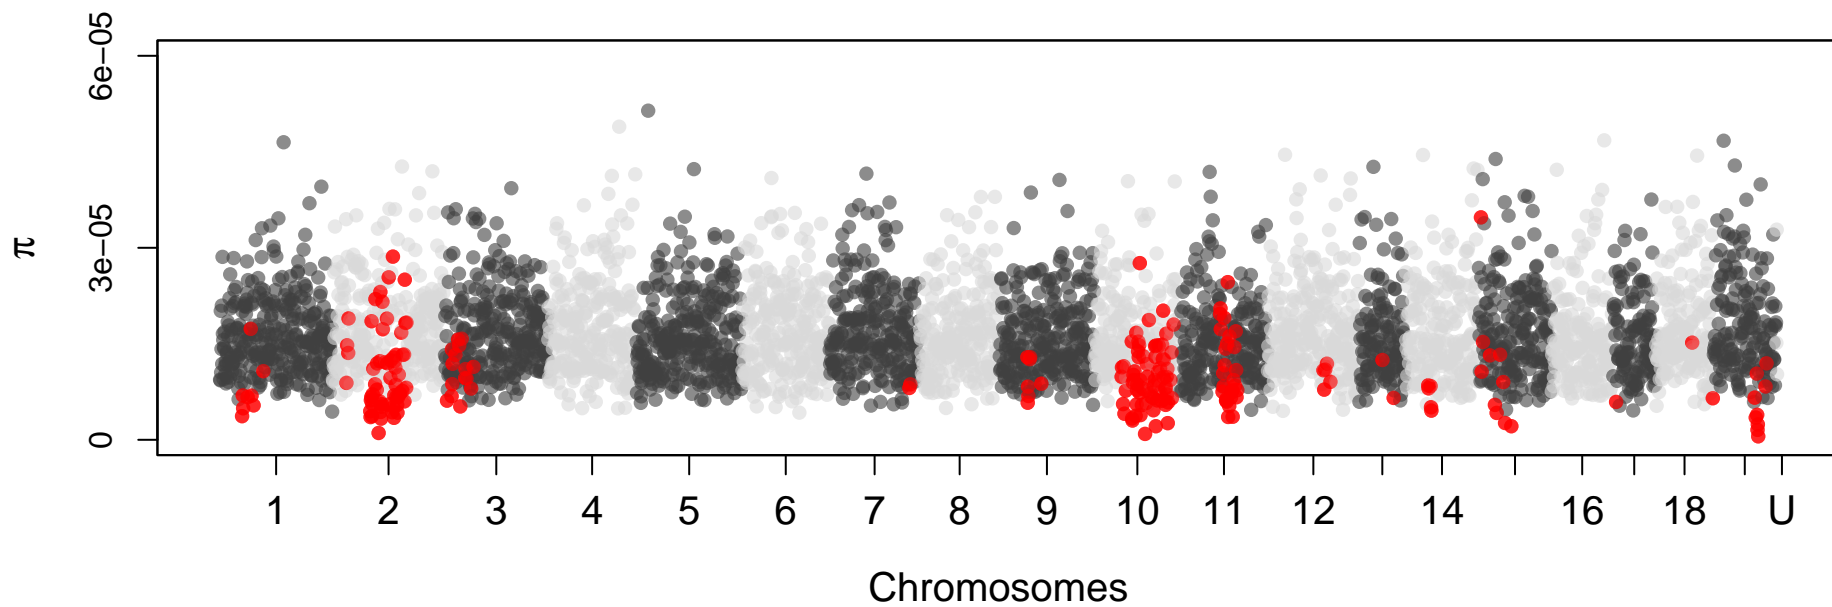

(b) *P. jacobaeus*

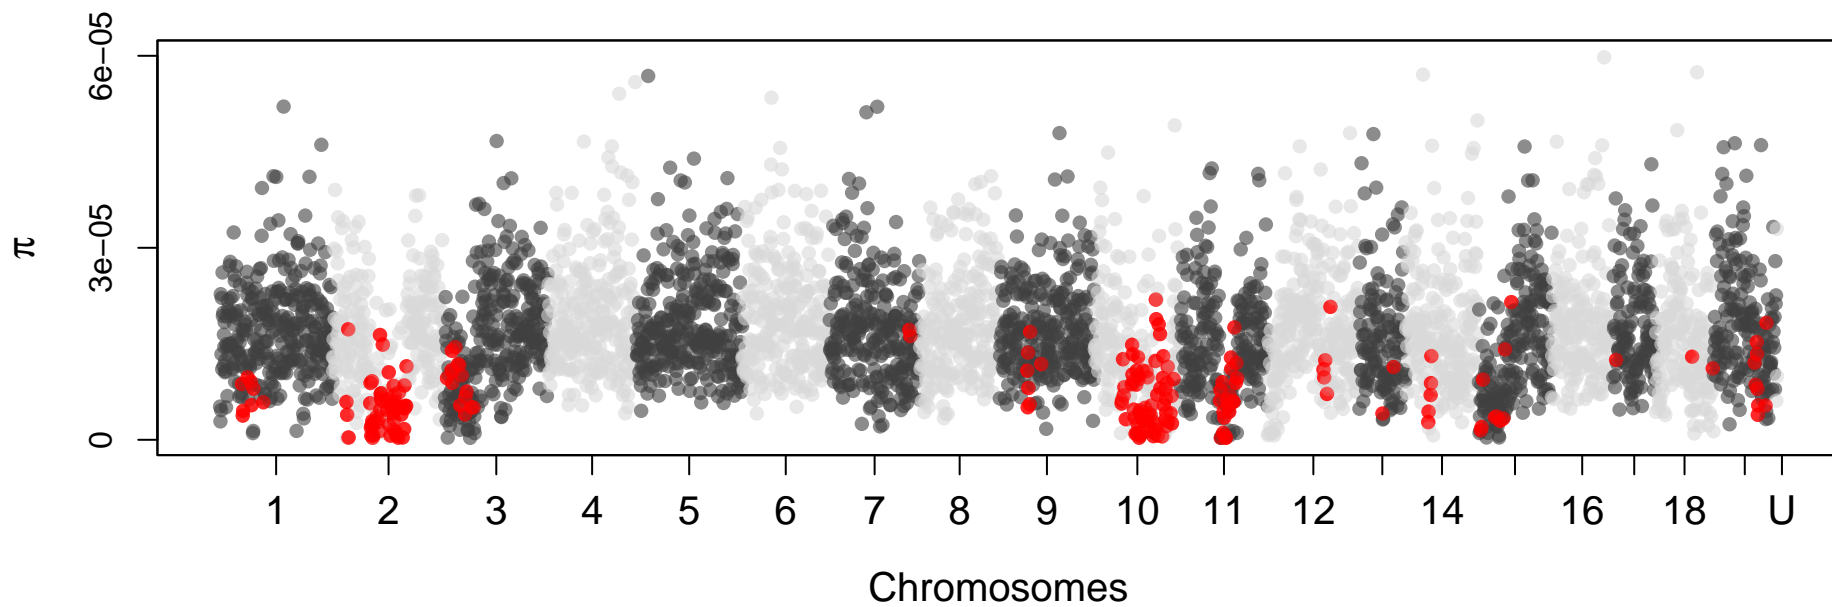

Supplement: s1 [file s1]

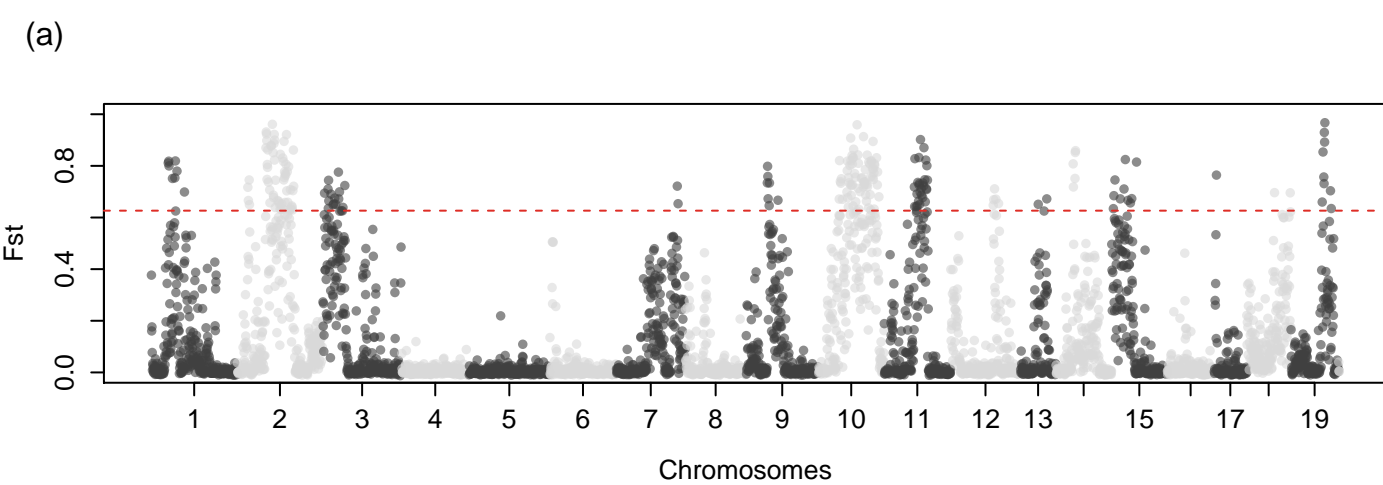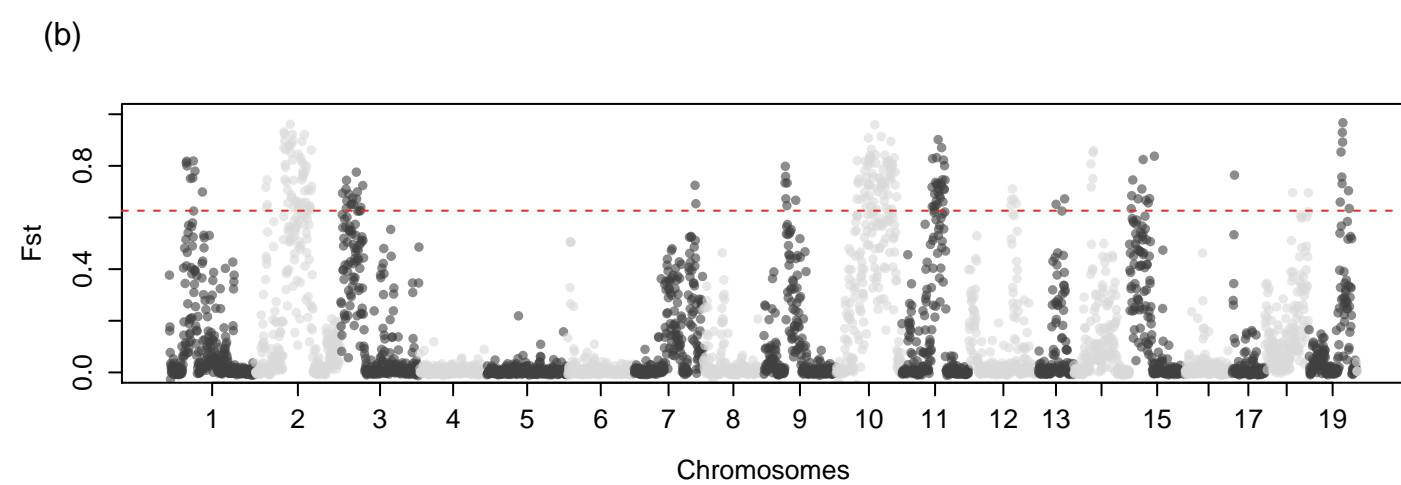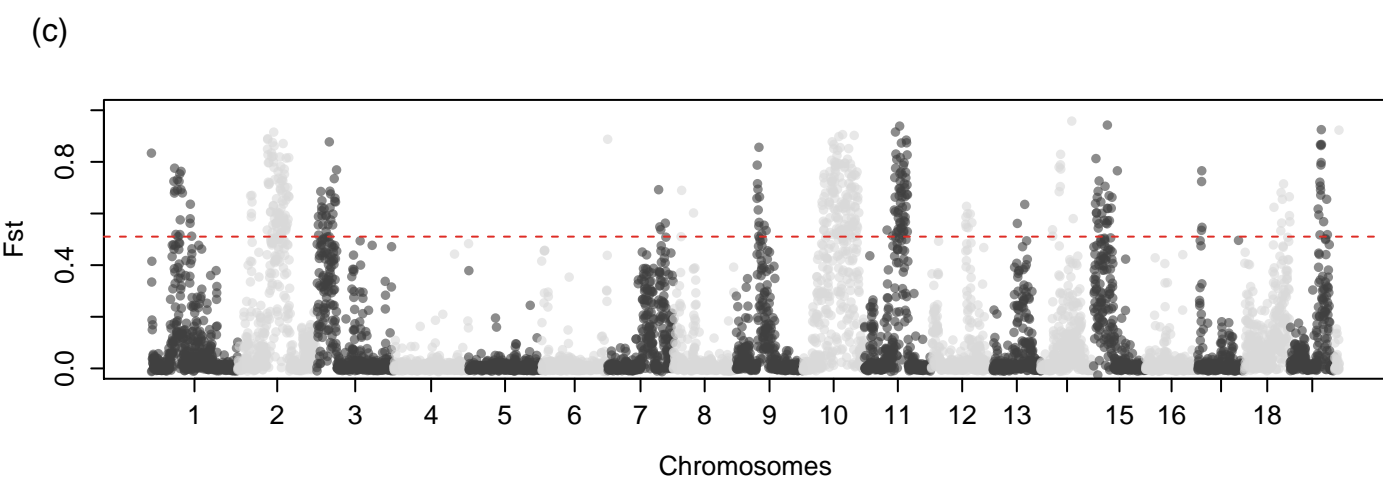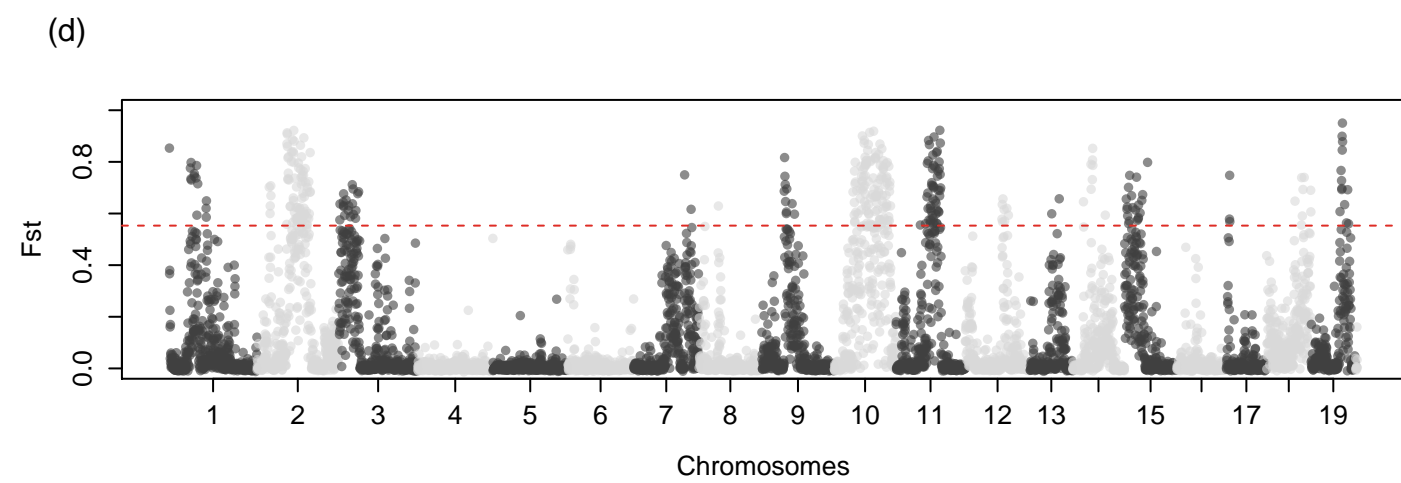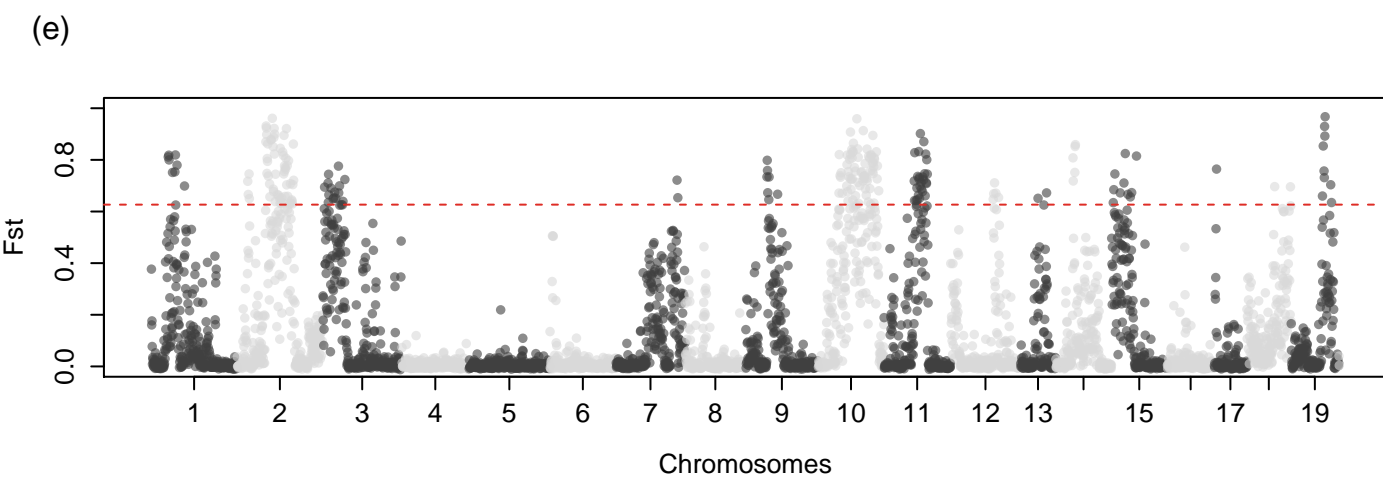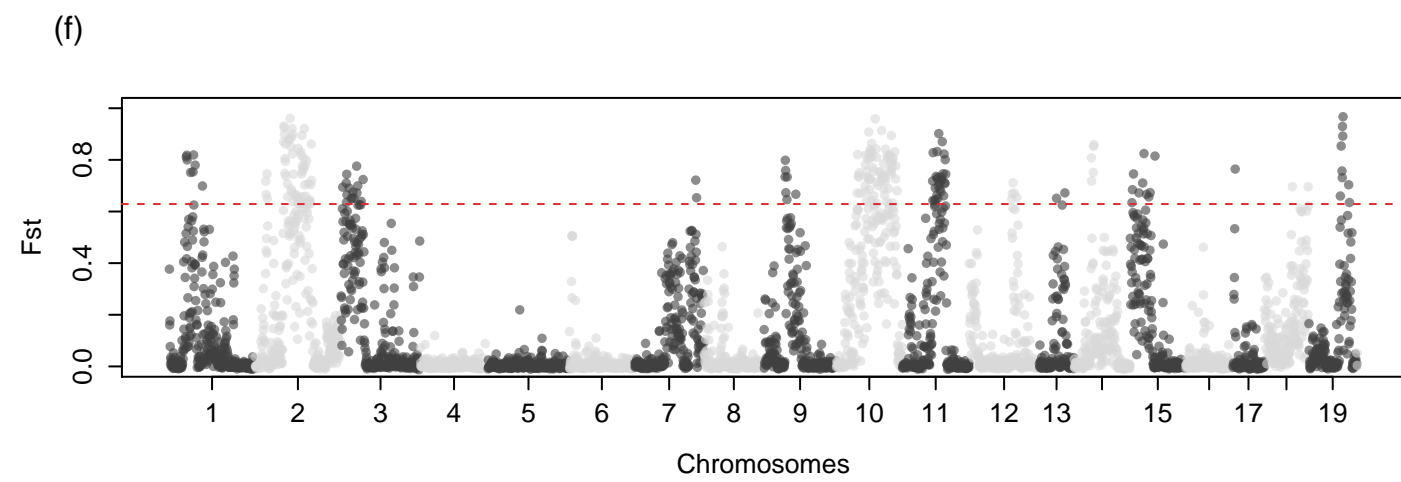

Supplement: s1 [file s1]

(a)

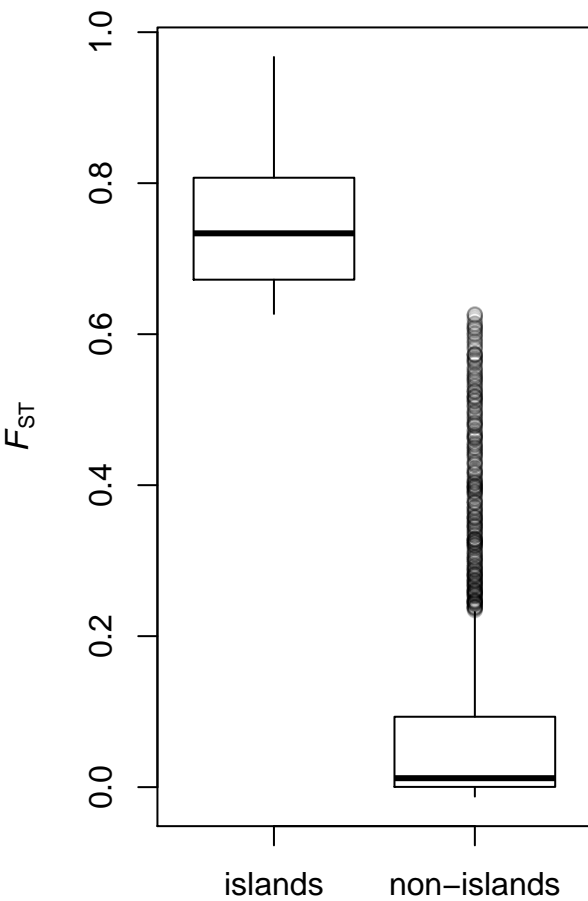

(b)

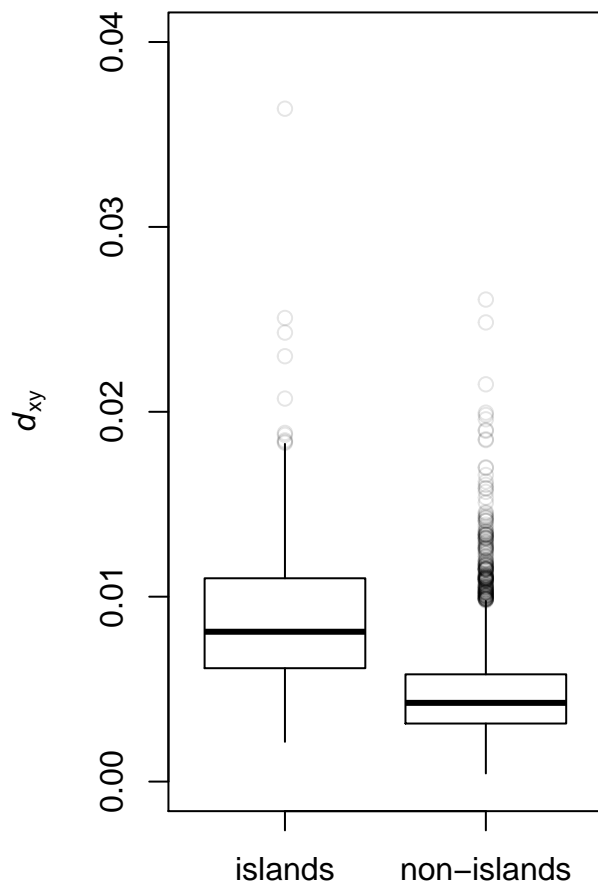

Supplement: s1 [file s1]
